# Supplementary material
Source: PubMed Central journal article supplement (PMC2719521)
Supplement: supp_84.8.685_Bida_eAppendix.pdf [file supp_84.8.685_Bida_eAppendix.pdf]

## Supplementary Online Content

Bida JP, Kyle RA, Therneau TM, Melton LJ III, Plevak MF, Larson DR, Dispenzieri A, Katzmann JA, Rajkumar SV. Disease associations with monoclonal gammopathy of undetermined significance: a population-based study of 17,398 patients. *Mayo Clin Proc.* 2009;84(8):685-693.

**eAPPENDIX.** Case (Monoclonal Gammopathy of Undetermined Significance [MGUS]) and Control Rate for Each of the 16,062 *Hospital Adaption of the International Classification of Diseases, 8th Edition*, Diagnostic Codes

This supplementary material has been peer reviewed, edited, and approved by the authors.

| Description                                        | No. of Positive Cases with Disease Code | Case Rate* | No. of Positive Controls with Disease Code | Control Rate* | Relative Risk (95%CI)    |
|----------------------------------------------------|-----------------------------------------|------------|--------------------------------------------|---------------|--------------------------|
| ABERRANT, BLOOD VESSEL, NOS                        | 0                                       | 0          | 2                                          | 0.5709        | 0(0-Inf)                 |
| ABERRANT, EYELASH                                  | 0                                       | 0          | 20                                         | 4.8919        | 0(0-Inf)                 |
| ABERRANT, THYROID                                  | 1                                       | 7.7838     | 0                                          | 0             | 17353147823.6925(0-Inf)  |
| ABNORMAL, (DIFFUSE) GAMMA GLOBULIN                 | 1                                       | 8.6103     | 2                                          | 0.8262        | 10.4219(0.9203-118.0257) |
| ABNORMAL, A/G RATIO                                | 0                                       | 0          | 1                                          | 1.9072        | 0(0-Inf)                 |
| ABNORMAL, ACID PHOSPHATASE, BLOOD SERUM            | 0                                       | 0          | 2                                          | 0.4854        | 0(0-Inf)                 |
| ABNORMAL, ALKALINE PHOSPHATASE, BLOOD SERUM        | 12                                      | 84.886     | 405                                        | 109.9699      | 0.7719(0.4342-1.3724)    |
| ABNORMAL, ALPHA-FETOPROTEIN, NOS                   | 1                                       | 7.3095     | 11                                         | 3.4001        | 2.1498(0.2747-16.8243)   |
| ABNORMAL, AMNIOTIC, FLUID FINDING (BABY'S HISTORY) | 0                                       | 0          | 1                                          | 0.8272        | 0(0-Inf)                 |
| ABNORMAL, AMNIOTIC, NEC (MOM'S HISTORY)            | 0                                       | 0          | 1                                          | 0.8271        | 0(0-Inf)                 |
| ABNORMAL, AMYLASE, BLOOD SERUM                     | 1                                       | 7.6912     | 43                                         | 14.111        | 0.5451(0.0748-3.9716)    |
| ABNORMAL, ANTI HCV +                               | 0                                       | 0          | 4                                          | 1.0119        | 0(0-Inf)                 |
| ABNORMAL, ANTIBODY TITERS, (ELEVATED)              | 2                                       | 14.4833    | 61                                         | 17.9465       | 0.807(0.1967-3.3113)     |
| ABNORMAL, AXIS DEVIATION                           | 1                                       | 7.0148     | 14                                         | 3.4011        | 2.0625(0.2683-15.8574)   |
| ABNORMAL, B 27                                     | 0                                       | 0          | 4                                          | 1.0301        | 0(0-Inf)                 |
| ABNORMAL, BASAL METABOLIC RATE                     | 0                                       | 0          | 5                                          | 1.1118        | 0(0-Inf)                 |
| ABNORMAL, BILIRUBIN, BLOOD SERUM                   | 1                                       | 7.775      | 34                                         | 11.8493       | 0.6562(0.0895-4.8087)    |
| ABNORMAL, BLEEDING TENDENCY                        | 0                                       | 0          | 1                                          | 0.8528        | 0(0-Inf)                 |
| ABNORMAL, BLEEDING TIME                            | 0                                       | 0          | 21                                         | 11.9291       | 0(0-Inf)                 |
| ABNORMAL, BLEEDING, UTERINE                        | 0                                       | 0          | 87                                         | 38.9866       | 0(0-Inf)                 |
| ABNORMAL, BLOOD FATS                               | 0                                       | 0          | 1                                          | 0.8528        | 0(0-Inf)                 |
| ABNORMAL, BLOOD SERUM FINDINGS                     | 10                                      | 90.8057    | 185                                        | 79.5512       | 1.1415(0.6029-2.1611)    |
| ABNORMAL, BLOOD-GAS LEVEL                          | 1                                       | 7.8277     | 5                                          | 1.6849        | 4.6458(0.5299-40.7304)   |
| ABNORMAL, BONE MARROW                              | 1                                       | 7.0952     | 8                                          | 2.3367        | 3.0364(0.3746-24.6102)   |
| ABNORMAL, CALCITONIN                               | 0                                       | 0          | 2                                          | 1.1973        | 0(0-Inf)                 |
| ABNORMAL, CALCIUM, BLOOD SERUM                     | 5                                       | 36.448     | 125                                        | 36.375        | 1.002(0.4087-2.4566)     |
| ABNORMAL, CARBONATE, BLOOD SERUM                   | 0                                       | 0          | 1                                          | 0.2354        | 0(0-Inf)                 |
| ABNORMAL, CARCINO-EMBRYONIC ANTIGEN (CEA)(CA 125)  | 2                                       | 14.3557    | 25                                         | 6.9878        | 2.0544(0.4821-8.7539)    |
| ABNORMAL, CARDIAC ENZYMES                          | 1                                       | 12.24      | 16                                         | 10.7661       | 1.1369(0.1499-8.6222)    |
| ABNORMAL, CATECHOLAMINES, URINE, ELEVATED          | 0                                       | 0          | 2                                          | 0.432         | 0(0-Inf)                 |
| ABNORMAL, CHLORIDE, BLOOD SERUM                    | 0                                       | 0          | 2                                          | 0.432         | 0(0-Inf)                 |
| ABNORMAL, CHOLESTEROL, BLOOD SERUM (LDL) (HDL)     | 29                                      | 205.32     | 1251                                       | 327.1077      | 0.6277(0.4341-0.9077)    |
| ABNORMAL, CHROMOSOME, NOS (SEE ALSO ANOMALY)       | 0                                       | 0          | 3                                          | 0.871         | 0(0-Inf)                 |
| ABNORMAL, CONDUCTION                               | 0                                       | 0          | 6                                          | 6.5326        | 0(0-Inf)                 |
| ABNORMAL, COPPER, BLOOD SERUM (CERULOPLASMIN)      | 1                                       | 7.1142     | 1                                          | 0.219         | 32.4918(1.8928-557.7592) |
| ABNORMAL, CORTISOL                                 | 0                                       | 0          | 3                                          | 1.2107        | 0(0-Inf)                 |
| ABNORMAL, CREATINE KINASE ENZYME                   | 0                                       | 0          | 56                                         | 20.7705       | 0(0-Inf)                 |
| ABNORMAL, CREATININE (CPK)                         | 25                                      | 249.9653   | 518                                        | 254.5002      | 0.9822(0.6568-1.4687)    |
| ABNORMAL, CULTURE, BLOOD, POSITIVE                 | 1                                       | 11.6618    | 9                                          | 5.7329        | 2.0342(0.2551-16.2224)   |
| ABNORMAL, CULTURE, NOSE, POSITIVE                  | 0                                       | 0          | 2                                          | 0.5908        | 0(0-Inf)                 |

| Description                                          | No. of Positive Cases with Disease Code | Case Rate* | No. of Positive Controls with Disease Code | Control Rate* | Relative Risk (95%CI)  |
|------------------------------------------------------|-----------------------------------------|------------|--------------------------------------------|---------------|------------------------|
| ABNORMAL, CULTURE, SPUTUM, POSITIVE, NEC             | 2                                       | 18.2439    | 17                                         | 7.387         | 2.4697(0.5653-10.7902) |
| ABNORMAL, CULTURE, STOOL, POSITIVE                   | 0                                       | 0          | 6                                          | 3.6258        | 0(0-Inf)               |
| ABNORMAL, CULTURE, THROAT, POSITIVE                  | 1                                       | 7.7343     | 55                                         | 12.9954       | 0.5952(0.0821-4.3144)  |
| ABNORMAL, CULTURE, URINE, POSITIVE                   | 4                                       | 51.3386    | 69                                         | 48.8586       | 1.0508(0.3826-2.8859)  |
| ABNORMAL, DARK ADAPTATION CURVE                      | 0                                       | 0          | 1                                          | 0.234         | 0(0-Inf)               |
| ABNORMAL, DENTITION                                  | 0                                       | 0          | 8                                          | 2.4857        | 0(0-Inf)               |
| ABNORMAL, DNA                                        | 0                                       | 0          | 2                                          | 0.5474        | 0(0-Inf)               |
| ABNORMAL, ECHOCARDIOGRAM                             | 11                                      | 100.0763   | 223                                        | 94.9346       | 1.0542(0.5744-1.9345)  |
| ABNORMAL, ECHOENCEPHALOGRAM                          | 0                                       | 0          | 2                                          | 0.4682        | 0(0-Inf)               |
| ABNORMAL, EJECTION FRACTION                          | 20                                      | 262.2082   | 273                                        | 197.5115      | 1.3276(0.842-2.0932)   |
| ABNORMAL, ELECTROCARDIOGRAM (ECG)(EKG)               | 27                                      | 222.6886   | 550                                        | 199.4077      | 1.1168(0.7579-1.6454)  |
| ABNORMAL, ELECTROENCEPHALOGRAM (EEG)                 | 0                                       | 0          | 13                                         | 4.7054        | 0(0-Inf)               |
| ABNORMAL, ELECTROLYTE, NOS                           | 1                                       | 11.1909    | 55                                         | 33.4182       | 0.3349(0.0463-2.4246)  |
| ABNORMAL, ENZYMES (GGT)(SGGT)                        | 11                                      | 80.7792    | 263                                        | 78.5181       | 1.0288(0.5618-1.884)   |
| ABNORMAL, ERYTHROCYTES                               | 0                                       | 0          | 1                                          | 0.8877        | 0(0-Inf)               |
| ABNORMAL, ERYTHROPOIESIS                             | 1                                       | 7.8803     | 10                                         | 3.415         | 2.3076(0.2915-18.2673) |
| ABNORMAL, EYE MOVEMENTS                              | 0                                       | 0          | 1                                          | 1.9059        | 0(0-Inf)               |
| ABNORMAL, FERRITIN (M 20-300;F 20-120)               | 4                                       | 31.7642    | 65                                         | 22.8047       | 1.3929(0.5055-3.8377)  |
| ABNORMAL, FETAL HEART RATE (INTRAUTERINE), NOS       | 0                                       | 0          | 1                                          | 0.398         | 0(0-Inf)               |
| ABNORMAL, FETAL HEART RATE BEFORE LABOR              | 0                                       | 0          | 1                                          | 0.398         | 0(0-Inf)               |
| ABNORMAL, FETAL HEART RATE DURING LABOR AND DELIVERY | 0                                       | 0          | 1                                          | 0.234         | 0(0-Inf)               |
| ABNORMAL, FIBRINOGEN TITER                           | 1                                       | 7.0623     | 3                                          | 0.7588        | 9.3073(0.9388-92.2689) |
| ABNORMAL, FINDING, NEC                               | 0                                       | 0          | 1                                          | 0.405         | 0(0-Inf)               |
| ABNORMAL, FUNCTION PUPIL NOS                         | 0                                       | 0          | 1                                          | 0.234         | 0(0-Inf)               |
| ABNORMAL, FUNCTION, CARDIAC                          | 0                                       | 0          | 12                                         | 4.1141        | 0(0-Inf)               |
| ABNORMAL, FUNCTION, LIVER                            | 30                                      | 226.3311   | 794                                        | 248.8699      | 0.9094(0.631-1.3107)   |
| ABNORMAL, FUNCTION, NEC                              | 0                                       | 0          | 1                                          | 0.234         | 0(0-Inf)               |
| ABNORMAL, FUNCTION, PULMONARY                        | 1                                       | 7.2644     | 131                                        | 38.7952       | 0.1872(0.0262-1.3408)  |
| ABNORMAL, FUNCTION, RENAL                            | 1                                       | 10.8985    | 13                                         | 7.3444        | 1.4839(0.1928-11.4226) |
| ABNORMAL, FUNCTION, THYROID                          | 5                                       | 35.0552    | 98                                         | 25.3901       | 1.3807(0.56-3.4043)    |
| ABNORMAL, GAIT                                       | 10                                      | 123.341    | 91                                         | 61.6637       | 2.0002(1.038-3.8545)   |
| ABNORMAL, GLOBULIN, THYROID BINDING (TBG)            | 2                                       | 19.0889    | 21                                         | 5.6867        | 3.3568(0.7798-14.4506) |
| ABNORMAL, GLUCOSE TOLERANCE TEST                     | 1                                       | 7.9236     | 26                                         | 6.6166        | 1.1975(0.1616-8.8734)  |
| ABNORMAL, GLUCOSE, BLOOD SERUM                       | 25                                      | 205.3355   | 825                                        | 300.0647      | 0.6843(0.4593-1.0195)  |
| ABNORMAL, HBS (HEPATITIS B SEROLOGY)                 | 0                                       | 0          | 15                                         | 3.7883        | 0(0-Inf)               |
| ABNORMAL, HCS (HEPATITIS C SEROLOGY)                 | 0                                       | 0          | 14                                         | 3.6506        | 0(0-Inf)               |
| ABNORMAL, HEMATOLOGIC FINDINGS                       | 0                                       | 0          | 7                                          | 1.8807        | 0(0-Inf)               |
| ABNORMAL, HEMOGLOBIN / HEMATOCRIT, NOS               | 2                                       | 16.9534    | 21                                         | 8.1564        | 2.0785(0.4838-8.9296)  |
| ABNORMAL, HEMOGLOBIN OR HEMATOCRIT, ELEVATED         | 1                                       | 7.384      | 57                                         | 17.6174       | 0.4191(0.0579-3.0341)  |
| ABNORMAL, HEMOGLOBIN OR HEMATOCRIT, LOW              | 9                                       | 68.5826    | 123                                        | 39.3441       | 1.7431(0.883-3.4413)   |

| Description                                             | No. of Positive Cases with Disease Code | Case Rate* | No. of Positive Controls with Disease Code | Control Rate* | Relative Risk (95%CI)   |
|---------------------------------------------------------|-----------------------------------------|------------|--------------------------------------------|---------------|-------------------------|
| ABNORMAL, HEMOQUANT, POSITIVE                           | 0                                       | 0          | 44                                         | 29.3324       | 0(0-Inf)                |
| ABNORMAL, HIV TEST POSITIVE                             | 0                                       | 0          | 3                                          | 0.746         | 0(0-Inf)                |
| ABNORMAL, HLA POSITIVE (HUMAN LEUKOCYTE ANTIGEN)        | 0                                       | 0          | 32                                         | 9.0765        | 0(0-Inf)                |
| ABNORMAL, HORMONE, THYROID STIMULATING (TSH)            | 16                                      | 129.3052   | 470                                        | 165.4771      | 0.7814(0.4742-1.2877)   |
| ABNORMAL, HORMONES, BLOOD SERUM (PTH)                   | 1                                       | 6.9501     | 56                                         | 14.2937       | 0.4862(0.0671-3.5231)   |
| ABNORMAL, HSA (HEPATITIS A SEROLOGY)                    | 0                                       | 0          | 1                                          | 0.8877        | 0(0-Inf)                |
| ABNORMAL, HTLV                                          | 0                                       | 0          | 3                                          | 0.6548        | 0(0-Inf)                |
| ABNORMAL, IMMUNOGLOBULIN (IGM IGA IGD IGE IGG)          | 7                                       | 49.2127    | 14                                         | 3.6688        | 13.4139(5.3177-33.8362) |
| ABNORMAL, INDOLACETIC ACID, URINE, ELEVATED (5HIAA)     | 0                                       | 0          | 2                                          | 0.4853        | 0(0-Inf)                |
| ABNORMAL, IRON, BLOOD SERUM, (M 20-300;F 21-120)        | 3                                       | 21.9519    | 123                                        | 28.745        | 0.7637(0.2424-2.4061)   |
| ABNORMAL, JAW, CLOSURE                                  | 0                                       | 0          | 2                                          | 1.7759        | 0(0-Inf)                |
| ABNORMAL, KNEE JERK                                     | 0                                       | 0          | 5                                          | 1.5262        | 0(0-Inf)                |
| ABNORMAL, LDH, BLOOD SERUM                              | 0                                       | 0          | 11                                         | 2.718         | 0(0-Inf)                |
| ABNORMAL, LIPASE, BLOOD SERUM                           | 1                                       | 9.4581     | 13                                         | 5.9834        | 1.5807(0.205-12.1898)   |
| ABNORMAL, LIPIDS, BLOOD SERUM                           | 24                                      | 170.3374   | 1090                                       | 292.2652      | 0.5828(0.3887-0.874)    |
| ABNORMAL, LITHIUM, BLOOD SERUM                          | 0                                       | 0          | 2                                          | 0.4854        | 0(0-Inf)                |
| ABNORMAL, LIVER                                         | 0                                       | 0          | 3                                          | 1.1479        | 0(0-Inf)                |
| ABNORMAL, MAGNESIUM, BLOOD SERUM                        | 0                                       | 0          | 4                                          | 2.3009        | 0(0-Inf)                |
| ABNORMAL, MAMMOGRAM (MILK OF CALCIUM BREAST)            | 3                                       | 21.1167    | 159                                        | 42.1992       | 0.5004(0.1594-1.5714)   |
| ABNORMAL, MCV, ELEVATED (NORMAL 84-99)                  | 5                                       | 50.8983    | 76                                         | 38.9859       | 1.3056(0.5266-3.2368)   |
| ABNORMAL, MCV, LOW (NORMAL 84-99)                       | 1                                       | 7.0488     | 16                                         | 4.2707        | 1.6505(0.2166-12.5743)  |
| ABNORMAL, MEGAKARYOCYTE                                 | 0                                       | 0          | 1                                          | 0.8877        | 0(0-Inf)                |
| ABNORMAL, MENSES                                        | 1                                       | 21.2073    | 8                                          | 3.0219        | 7.0179(0.87-56.6092)    |
| ABNORMAL, MICROBIOLOGIC FINDING                         | 0                                       | 0          | 1                                          | 0.234         | 0(0-Inf)                |
| ABNORMAL, MOVEMENT, HEAD                                | 0                                       | 0          | 2                                          | 0.5708        | 0(0-Inf)                |
| ABNORMAL, NITROGEN DERIVATIVES, BLOOD SERUM             | 0                                       | 0          | 5                                          | 3.2649        | 0(0-Inf)                |
| ABNORMAL, OCCULT BLOOD GUAIAC                           | 1                                       | 10.7954    | 24                                         | 13.6099       | 0.7932(0.1068-5.89)     |
| ABNORMAL, OPTOKINETICS                                  | 0                                       | 0          | 2                                          | 0.7055        | 0(0-Inf)                |
| ABNORMAL, OXYGEN SATURATION                             | 2                                       | 20.6785    | 69                                         | 36.255        | 0.5704(0.1395-2.3315)   |
| ABNORMAL, PAPANICOLAOU SMEAR, CERVIX, POSITIVE          | 8                                       | 62.9037    | 305                                        | 67.036        | 0.9384(0.4642-1.8969)   |
| ABNORMAL, PAPANICOLAOU, NEC, POSITIVE-OTHER THAN CERVIX | 0                                       | 0          | 10                                         | 2.3427        | 0(0-Inf)                |
| ABNORMAL, PERCUSSION, RESPIRATORY                       | 1                                       | 11.2749    | 0                                          | 0             | 7471487691.2608(0-Inf)  |
| ABNORMAL, PHOSPHORUS, BLOOD SERUM                       | 0                                       | 0          | 5                                          | 3.9425        | 0(0-Inf)                |
| ABNORMAL, PLATELET COUNT                                | 3                                       | 27.3732    | 55                                         | 24.0444       | 1.1384(0.3549-3.6518)   |
| ABNORMAL, PO2-OXYGEN RATIO                              | 0                                       | 0          | 2                                          | 1.8994        | 0(0-Inf)                |
| ABNORMAL, POSTURE                                       | 0                                       | 0          | 25                                         | 7.4291        | 0(0-Inf)                |
| ABNORMAL, POTASSIUM, BLOOD SERUM                        | 3                                       | 25.3585    | 61                                         | 23.4423       | 1.0817(0.3382-3.4602)   |
| ABNORMAL, PROSTATIC SPECIFIC ANTIGEN (PSA)              | 46                                      | 979.1134   | 1239                                       | 1355.1997     | 0.7225(0.538-0.9702)    |

| Description                                                  | No. of Positive Cases with Disease Code | Case Rate* | No. of Positive Controls with Disease Code | Control Rate* | Relative Risk (95%CI)  |
|--------------------------------------------------------------|-----------------------------------------|------------|--------------------------------------------|---------------|------------------------|
| ABNORMAL, PROTEIN, SERUM                                     | 16                                      | 183.1395   | 102                                        | 60.6793       | 3.0182(1.7759-5.1294)  |
| ABNORMAL, PROTEIN, TOTAL                                     | 0                                       | 0          | 3                                          | 0.9773        | 0(0-Inf)               |
| ABNORMAL, PROTHROMBIN TIME                                   | 9                                       | 106.3813   | 203                                        | 129.7799      | 0.8197(0.4199-1.6004)  |
| ABNORMAL, PULP, HARD TISSUE FORMATION IN                     | 0                                       | 0          | 1                                          | 0.234         | 0(0-Inf)               |
| ABNORMAL, PULSE                                              | 5                                       | 51.7684    | 57                                         | 29.9408       | 1.729(0.6903-4.331)    |
| ABNORMAL, PUPILS (PUPILLARY)                                 | 1                                       | 11.7921    | 4                                          | 2.7746        | 4.2499(0.4666-38.7117) |
| ABNORMAL, RED BLOOD CELL COUNT                               | 0                                       | 0          | 12                                         | 3.1927        | 0(0-Inf)               |
| ABNORMAL, RED BLOOD CELL MORPHOLOGY, NEC                     | 1                                       | 7.6458     | 12                                         | 3.9903        | 1.9161(0.2467-14.8795) |
| ABNORMAL, REFLEX, SEE ALSO DISORDER, MOTILITY FOR G I SYSTEM | 0                                       | 0          | 50                                         | 12.9761       | 0(0-Inf)               |
| ABNORMAL, RENIN (HIGH OR LOW)                                | 0                                       | 0          | 1                                          | 0.8533        | 0(0-Inf)               |
| ABNORMAL, SCAN, BONE                                         | 7                                       | 62.518     | 66                                         | 27.6439       | 2.2615(1.0328-4.9523)  |
| ABNORMAL, SCAN, BRAIN                                        | 2                                       | 18.9214    | 102                                        | 47.0201       | 0.4024(0.0991-1.6337)  |
| ABNORMAL, SCAN, LIVER                                        | 1                                       | 8.941      | 17                                         | 7.1709        | 1.2468(0.1648-9.4348)  |
| ABNORMAL, SCAN, LUNG                                         | 2                                       | 16.9026    | 88                                         | 33.9396       | 0.498(0.1223-2.0272)   |
| ABNORMAL, SCAN, NEC                                          | 18                                      | 156.3664   | 535                                        | 215.7029      | 0.7249(0.4528-1.1606)  |
| ABNORMAL, SCAN, PANCREAS                                     | 0                                       | 0          | 10                                         | 5.0892        | 0(0-Inf)               |
| ABNORMAL, SCAN, RENAL                                        | 1                                       | 9.9879     | 26                                         | 13.0084       | 0.7678(0.1037-5.6832)  |
| ABNORMAL, SCAN, SPLEEN                                       | 0                                       | 0          | 2                                          | 1.1615        | 0(0-Inf)               |
| ABNORMAL, SCAN, THYROID                                      | 0                                       | 0          | 6                                          | 1.7645        | 0(0-Inf)               |
| ABNORMAL, SEDIMENTATION RATE, ELEVATED                       | 13                                      | 118.7033   | 147                                        | 63.2544       | 1.8766(1.0612-3.3186)  |
| ABNORMAL, SEROLOGY FOR LYME'S DISEASE, POSITIVE              | 0                                       | 0          | 2                                          | 0.5457        | 0(0-Inf)               |
| ABNORMAL, SEROLOGY FOR SYPHILIS, FALSE POSITIVE              | 0                                       | 0          | 10                                         | 2.7202        | 0(0-Inf)               |
| ABNORMAL, SEROLOGY FOR SYPHILIS, POSITIVE                    | 1                                       | 7.1151     | 8                                          | 1.9134        | 3.7186(0.4567-30.2779) |
| ABNORMAL, SGOT (AST)(GOT)(NORMAL 8-20)                       | 13                                      | 95.8503    | 538                                        | 162.5619      | 0.5896(0.3398-1.0231)  |
| ABNORMAL, SGPT (ALT)                                         | 0                                       | 0          | 75                                         | 19.3661       | 0(0-Inf)               |
| ABNORMAL, SKIN TEST, POSITIVE                                | 0                                       | 0          | 6                                          | 1.6037        | 0(0-Inf)               |
| ABNORMAL, SODIUM, BLOOD SERUM                                | 0                                       | 0          | 7                                          | 5.0805        | 0(0-Inf)               |
| ABNORMAL, SPINAL FLUID                                       | 0                                       | 0          | 1                                          | 0.2354        | 0(0-Inf)               |
| ABNORMAL, SPUTUM (AMOUNT) (COLOR)                            | 0                                       | 0          | 84                                         | 50.1688       | 0(0-Inf)               |
| ABNORMAL, STOOLS, BLOOD IN                                   | 10                                      | 76.6179    | 237                                        | 76.0186       | 1.0079(0.5343-1.9011)  |
| ABNORMAL, STOOLS, COLOR                                      | 2                                       | 14.965     | 24                                         | 7.433         | 2.0133(0.4718-8.591)   |
| ABNORMAL, STOOLS, DARK COLOR                                 | 3                                       | 29.5348    | 97                                         | 47.7071       | 0.6191(0.1958-1.9573)  |
| ABNORMAL, STOOLS, FAT IN                                     | 0                                       | 0          | 3                                          | 2.0947        | 0(0-Inf)               |
| ABNORMAL, STOOLS, LIGHT COLOR                                | 0                                       | 0          | 3                                          | 3.9227        | 0(0-Inf)               |
| ABNORMAL, STOOLS, MUCUS IN                                   | 0                                       | 0          | 6                                          | 2.7027        | 0(0-Inf)               |
| ABNORMAL, STOOLS, NEC                                        | 1                                       | 9.6418     | 49                                         | 23.3904       | 0.4122(0.0568-2.9928)  |
| ABNORMAL, SWEATING PATTERN                                   | 1                                       | 8.2588     | 103                                        | 38.2115       | 0.2161(0.0301-1.5512)  |
| ABNORMAL, THYROXINE (T4)                                     | 3                                       | 23.3238    | 48                                         | 10.7117       | 2.1774(0.6739-7.0351)  |
| ABNORMAL, TOXICOLOGY, HEAVY METAL                            | 0                                       | 0          | 1                                          | 0.398         | 0(0-Inf)               |

| Description                                        | No. of Positive Cases with Disease Code | Case Rate* | No. of Positive Controls with Disease Code | Control Rate* | Relative Risk (95%CI)    |
|----------------------------------------------------|-----------------------------------------|------------|--------------------------------------------|---------------|--------------------------|
| ABNORMAL, TOXICOLOGY, NEC                          | 0                                       | 0          | 1                                          | 0.2354        | 0(0-Inf)                 |
| ABNORMAL, TRANSAMINASE, BLOOD SERUM                | 7                                       | 49.5035    | 186                                        | 50.4597       | 0.9811(0.4603-2.0912)    |
| ABNORMAL, TRIGLYCERIDE                             | 7                                       | 49.3629    | 368                                        | 90.2941       | 0.5467(0.2585-1.1562)    |
| ABNORMAL, TUBERCULIN TEST, POSITIVE                | 15                                      | 105.712    | 273                                        | 67.9517       | 1.5557(0.923-2.622)      |
| ABNORMAL, ULTRASOUND CARDIOGRAM                    | 0                                       | 0          | 1                                          | 0.2354        | 0(0-Inf)                 |
| ABNORMAL, URIC ACID, BLOOD SERUM                   | 2                                       | 17.6272    | 28                                         | 11.5444       | 1.5269(0.3616-6.4467)    |
| ABNORMAL, URINE, 17-KETOSTEROIDS ELEVATED          | 0                                       | 0          | 1                                          | 0.8273        | 0(0-Inf)                 |
| ABNORMAL, URINE, CASTS                             | 0                                       | 0          | 1                                          | 0.3526        | 0(0-Inf)                 |
| ABNORMAL, URINE, CATECHOLAMINES, ELEVATED          | 0                                       | 0          | 2                                          | 0.7052        | 0(0-Inf)                 |
| ABNORMAL, URINE, INDOLACETIC ACID ELEVATED (5HIAA) | 0                                       | 0          | 2                                          | 0.432         | 0(0-Inf)                 |
| ABNORMAL, URINE, MALIGNANT CELLS                   | 0                                       | 0          | 1                                          | 0.3526        | 0(0-Inf)                 |
| ABNORMAL, URINE, NEC                               | 16                                      | 146.636    | 209                                        | 90.8606       | 1.6139(0.9685-2.6892)    |
| ABNORMAL, URINE, POSITIVE MALIGNANT CELLS          | 0                                       | 0          | 14                                         | 9.9358        | 0(0-Inf)                 |
| ABNORMAL, URINE, SEDIMENT                          | 0                                       | 0          | 8                                          | 10.9238       | 0(0-Inf)                 |
| ABNORMAL, URINE, UNUSUAL COLOR OR ODOR             | 5                                       | 54.1931    | 100                                        | 57.1079       | 0.949(0.3856-2.3355)     |
| ABNORMAL, WHITE BLOOD CELL COUNT, ELEVATED         | 2                                       | 22.6135    | 91                                         | 54.9345       | 0.4116(0.1012-1.6738)    |
| ABNORMAL, WHITE BLOOD CELL COUNT, LOW              | 0                                       | 0          | 16                                         | 4.3988        | 0(0-Inf)                 |
| ABNORMAL, WHITE BLOOD CELL FINDINGS                | 1                                       | 6.961      | 11                                         | 2.7948        | 2.4907(0.3168-19.5843)   |
| ABNORMAL, XEROGRAPHY, BREAST                       | 0                                       | 0          | 1                                          | 0.234         | 0(0-Inf)                 |
| ABNORMAL, X-RAY, BILIARY TRACT                     | 0                                       | 0          | 6                                          | 4.8005        | 0(0-Inf)                 |
| ABNORMAL, X-RAY, BREAST                            | 14                                      | 99.2523    | 418                                        | 98.1199       | 1.0115(0.5929-1.7258)    |
| ABNORMAL, X-RAY, GASTROINTESTINAL TRACT            | 0                                       | 0          | 44                                         | 13.6861       | 0(0-Inf)                 |
| ABNORMAL, X-RAY, GENITOURINARY ORGANS              | 2                                       | 15.7933    | 25                                         | 8.7703        | 1.8008(0.4238-7.6513)    |
| ABNORMAL, X-RAY, HEAD                              | 0                                       | 0          | 41                                         | 16.1616       | 0(0-Inf)                 |
| ABNORMAL, X-RAY, HEART SHADOW                      | 1                                       | 6.9451     | 7                                          | 1.76          | 3.9462(0.4752-32.7731)   |
| ABNORMAL, X-RAY, INTRATHORACIC ORGANS              | 0                                       | 0          | 4                                          | 1.8411        | 0(0-Inf)                 |
| ABNORMAL, X-RAY, LUNG FIELD                        | 22                                      | 206.3104   | 500                                        | 224.158       | 0.9204(0.5999-1.4121)    |
| ABNORMAL, X-RAY, MUSCULOSKELETAL                   | 6                                       | 51.4769    | 169                                        | 66.3133       | 0.7763(0.3432-1.7557)    |
| ABNORMAL, X-RAY, NEC                               | 4                                       | 32.2176    | 101                                        | 35.8313       | 0.8991(0.3301-2.4489)    |
| ABNORMAL, ZINC, BLOOD SERUM                        | 1                                       | 11.5242    | 1                                          | 0.2567        | 44.8874(2.6681-755.1688) |
| ABORTION, HABITUAL                                 | 0                                       | 0          | 1                                          | 0.8271        | 0(0-Inf)                 |
| ABORTION, MISSED                                   | 0                                       | 0          | 9                                          | 4.644         | 0(0-Inf)                 |
| ABORTION, NOS, SEE ALSO ABORTION, SPONTANEOUS      | 0                                       | 0          | 4                                          | 3.3137        | 0(0-Inf)                 |
| ABORTION, SPONTANEOUS, COMPLETE                    | 0                                       | 0          | 17                                         | 17.3993       | 0(0-Inf)                 |
| ABORTION, SPONTANEOUS, INCOMPLETE                  | 1                                       | 99.9547    | 21                                         | 29.4832       | 3.3902(0.4558-25.2158)   |
| ABORTION, SPONTANEOUS, INEVITABLE                  | 0                                       | 0          | 1                                          | 0.398         | 0(0-Inf)                 |
| ABORTION, THREATENED                               | 0                                       | 0          | 5                                          | 3.0666        | 0(0-Inf)                 |
| ABRASION, ANAL --AABR                              | 0                                       | 0          | 10                                         | 2.9728        | 0(0-Inf)                 |
| ABRASION, CONJUNCTIVA                              | 1                                       | 7.1672     | 21                                         | 4.9771        | 1.44(0.1922-10.7892)     |
| ABRASION, CORNEA                                   | 33                                      | 296.4736   | 970                                        | 260.9995      | 1.1359(0.8022-1.6084)    |

| Description                                         | No. of Positive Cases with Disease Code |            | No. of Positive Controls with Disease Code |               | Relative Risk (95%CI)    |
|-----------------------------------------------------|-----------------------------------------|------------|--------------------------------------------|---------------|--------------------------|
|                                                     |                                         | Case Rate* |                                            | Control Rate* |                          |
| ABRASION, NOS, SEE ALSO INJURY, SUPERFICIAL BY SITE | 22                                      | 213.9912   | 301                                        | 141.9595      | 1.5074(0.9762-2.3278)    |
| ABRASION, TOOTH                                     | 0                                       | 0          | 12                                         | 2.9709        | 0(0-Inf)                 |
| ABSCCESS, ANAL                                      | 2                                       | 20.4556    | 25                                         | 7.483         | 2.7336(0.6431-11.6195)   |
| ABSCCESS, ANKLE (REGION)                            | 1                                       | 12.1188    | 23                                         | 15.2885       | 0.7927(0.1066-5.8939)    |
| ABSCCESS, ANORECTAL                                 | 0                                       | 0          | 2                                          | 0.8722        | 0(0-Inf)                 |
| ABSCCESS, APPENDIX                                  | 0                                       | 0          | 12                                         | 3.1619        | 0(0-Inf)                 |
| ABSCCESS, ARM                                       | 0                                       | 0          | 16                                         | 5.1704        | 0(0-Inf)                 |
| ABSCCESS, AURICLE                                   | 0                                       | 0          | 6                                          | 1.3973        | 0(0-Inf)                 |
| ABSCCESS, AXILLA                                    | 2                                       | 14.3213    | 20                                         | 4.6163        | 3.1023(0.7169-13.4245)   |
| ABSCCESS, BARTHOLIN                                 | 2                                       | 42.5953    | 35                                         | 17.2324       | 2.4718(0.5908-10.341)    |
| ABSCCESS, BARTHOLIN, RECURRENT                      | 0                                       | 0          | 2                                          | 0.7961        | 0(0-Inf)                 |
| ABSCCESS, BONE                                      | 0                                       | 0          | 1                                          | 0.8878        | 0(0-Inf)                 |
| ABSCCESS, BRAIN, LATE EFFECT                        | 0                                       | 0          | 1                                          | 0.2729        | 0(0-Inf)                 |
| ABSCCESS, BRAIN, NOS                                | 0                                       | 0          | 2                                          | 0.4854        | 0(0-Inf)                 |
| ABSCCESS, BREAST                                    | 0                                       | 0          | 76                                         | 16.7624       | 0(0-Inf)                 |
| ABSCCESS, BUCCAL CAVITY                             | 0                                       | 0          | 30                                         | 7.4388        | 0(0-Inf)                 |
| ABSCCESS, CERVICAL LYMPH NODES                      | 0                                       | 0          | 1                                          | 0.4751        | 0(0-Inf)                 |
| ABSCCESS, CERVICAL NECK REGION                      | 1                                       | 7.3925     | 19                                         | 4.8144        | 1.5355(0.2042-11.5465)   |
| ABSCCESS, CHEEK, INNER                              | 1                                       | 7.2109     | 2                                          | 0.4643        | 15.5317(1.3401-180.0172) |
| ABSCCESS, CHEST (INTERNAL), NOS                     | 0                                       | 0          | 3                                          | 0.7798        | 0(0-Inf)                 |
| ABSCCESS, COLON, NOS                                | 5                                       | 35.704     | 31                                         | 8.5635        | 4.1693(1.6049-10.8314)   |
| ABSCCESS, COLON, SIGMOID                            | 5                                       | 34.8291    | 39                                         | 9.8329        | 3.5421(1.3844-9.0628)    |
| ABSCCESS, CORNEA                                    | 0                                       | 0          | 3                                          | 0.7175        | 0(0-Inf)                 |
| ABSCCESS, DENTAL                                    | 1                                       | 7.1254     | 94                                         | 26.2406       | 0.2715(0.0378-1.9512)    |
| ABSCCESS, EAR                                       | 1                                       | 7.631      | 15                                         | 3.676         | 2.0759(0.2715-15.87)     |
| ABSCCESS, EAR LOBE                                  | 1                                       | 7.2476     | 10                                         | 2.2987        | 3.153(0.3971-25.0332)    |
| ABSCCESS, EPIDURAL, (SPINAL)                        | 0                                       | 0          | 8                                          | 3.5708        | 0(0-Inf)                 |
| ABSCCESS, EXTERNAL AUDITORY CANAL                   | 0                                       | 0          | 3                                          | 0.8873        | 0(0-Inf)                 |
| ABSCCESS, EYE                                       | 0                                       | 0          | 6                                          | 1.7129        | 0(0-Inf)                 |
| ABSCCESS, EYELID                                    | 0                                       | 0          | 3                                          | 0.6549        | 0(0-Inf)                 |
| ABSCCESS, FACE                                      | 3                                       | 21.1936    | 60                                         | 14.6949       | 1.4422(0.4503-4.6189)    |
| ABSCCESS, FINGER                                    | 1                                       | 6.9585     | 52                                         | 12.8277       | 0.5425(0.0748-3.9363)    |
| ABSCCESS, FINGER, ACUTE                             | 0                                       | 0          | 1                                          | 0.234         | 0(0-Inf)                 |
| ABSCCESS, FOOT                                      | 2                                       | 13.8539    | 22                                         | 5.6446        | 2.4544(0.5721-10.5293)   |
| ABSCCESS, FOREARM                                   | 0                                       | 0          | 6                                          | 1.577         | 0(0-Inf)                 |
| ABSCCESS, GINGIVAL                                  | 1                                       | 6.9535     | 13                                         | 3.1992        | 2.1735(0.281-16.8105)    |
| ABSCCESS, GUM                                       | 0                                       | 0          | 5                                          | 1.2093        | 0(0-Inf)                 |
| ABSCCESS, HAND                                      | 2                                       | 14.3386    | 16                                         | 4.7113        | 3.0434(0.6928-13.3697)   |
| ABSCCESS, HEPATIC                                   | 0                                       | 0          | 12                                         | 4.0723        | 0(0-Inf)                 |
| ABSCCESS, HIP                                       | 0                                       | 0          | 5                                          | 6.9144        | 0(0-Inf)                 |

| Description                                | No. of Positive Cases with Disease Code | Case Rate* | No. of Positive Controls with Disease Code | Control Rate* | Relative Risk (95%CI)  |
|--------------------------------------------|-----------------------------------------|------------|--------------------------------------------|---------------|------------------------|
| ABSCCESS, ILIOPSOAS, NOS                   | 0                                       | 0          | 2                                          | 0.5475        | 0(0-Inf)               |
| ABSCCESS, INTESTINE, LARGE                 | 1                                       | 6.9516     | 6                                          | 1.5224        | 4.5661(0.5367-38.847)  |
| ABSCCESS, INTESTINE, NOS                   | 0                                       | 0          | 13                                         | 6.2072        | 0(0-Inf)               |
| ABSCCESS, INTESTINE, SMALL                 | 0                                       | 0          | 11                                         | 4.6969        | 0(0-Inf)               |
| ABSCCESS, INTRA-ABDOMINAL                  | 1                                       | 8.4509     | 30                                         | 11.6238       | 0.727(0.0987-5.3536)   |
| ABSCCESS, ISCHIORECTAL                     | 0                                       | 0          | 8                                          | 2.4029        | 0(0-Inf)               |
| ABSCCESS, JAW                              | 0                                       | 0          | 13                                         | 3.252         | 0(0-Inf)               |
| ABSCCESS, JOINT, SEE ALSO INFECTION, JOINT | 0                                       | 0          | 1                                          | 0.2354        | 0(0-Inf)               |
| ABSCCESS, KIDNEY                           | 0                                       | 0          | 4                                          | 2.4147        | 0(0-Inf)               |
| ABSCCESS, LABIA                            | 0                                       | 0          | 27                                         | 12.1041       | 0(0-Inf)               |
| ABSCCESS, LEG                              | 5                                       | 36.4215    | 68                                         | 20.0807       | 1.8138(0.7282-4.5178)  |
| ABSCCESS, LID                              | 0                                       | 0          | 2                                          | 0.9508        | 0(0-Inf)               |
| ABSCCESS, LIP                              | 2                                       | 13.8683    | 16                                         | 3.9993        | 3.4677(0.7874-15.2719) |
| ABSCCESS, LIVER, NOS                       | 1                                       | 7.8839     | 6                                          | 2.0502        | 3.8455(0.4539-32.5762) |
| ABSCCESS, LUMBAR, NOS                      | 0                                       | 0          | 1                                          | 0.4049        | 0(0-Inf)               |
| ABSCCESS, LUNG, CHRONIC                    | 0                                       | 0          | 2                                          | 0.5475        | 0(0-Inf)               |
| ABSCCESS, LUNG, NOS                        | 1                                       | 7.0107     | 21                                         | 5.9175        | 1.1847(0.1584-8.8612)  |
| ABSCCESS, LUNG, RESOLVING                  | 0                                       | 0          | 1                                          | 0.2729        | 0(0-Inf)               |
| ABSCCESS, MAXILLA                          | 0                                       | 0          | 5                                          | 1.1789        | 0(0-Inf)               |
| ABSCCESS, MOUTH                            | 0                                       | 0          | 4                                          | 3.0035        | 0(0-Inf)               |
| ABSCCESS, MYOCARDIUM                       | 0                                       | 0          | 2                                          | 0.7897        | 0(0-Inf)               |
| ABSCCESS, NECK                             | 1                                       | 7.4382     | 25                                         | 7.8688        | 0.9453(0.1274-7.0121)  |
| ABSCCESS, NOS, SEE ALSO CELLULITIS         | 5                                       | 39.7517    | 135                                        | 47.0177       | 0.8455(0.3455-2.0687)  |
| ABSCCESS, NOSE                             | 2                                       | 14.1524    | 35                                         | 8.6455        | 1.637(0.3915-6.845)    |
| ABSCCESS, NOSE, EXTERNAL                   | 0                                       | 0          | 15                                         | 6.2982        | 0(0-Inf)               |
| ABSCCESS, ORBITAL                          | 0                                       | 0          | 1                                          | 0.398         | 0(0-Inf)               |
| ABSCCESS, OVARIAN OR PARA-OVARIAN          | 0                                       | 0          | 2                                          | 0.8097        | 0(0-Inf)               |
| ABSCCESS, PALATE, HARD                     | 0                                       | 0          | 1                                          | 0.4049        | 0(0-Inf)               |
| ABSCCESS, PALATE, NOS                      | 0                                       | 0          | 1                                          | 0.2729        | 0(0-Inf)               |
| ABSCCESS, PALATE, SOFT                     | 0                                       | 0          | 3                                          | 0.7798        | 0(0-Inf)               |
| ABSCCESS, PANCREAS (5-1-81)                | 0                                       | 0          | 4                                          | 1.5028        | 0(0-Inf)               |
| ABSCCESS, PAROTID                          | 0                                       | 0          | 2                                          | 1.8978        | 0(0-Inf)               |
| ABSCCESS, PAROTID DUCT OR GLAND REGION     | 0                                       | 0          | 2                                          | 0.7054        | 0(0-Inf)               |
| ABSCCESS, PELVIC, FEMALE                   | 1                                       | 14.005     | 17                                         | 8.8244        | 1.5871(0.209-12.0532)  |
| ABSCCESS, PELVIC, MALE                     | 2                                       | 13.7994    | 8                                          | 2.208         | 6.2498(1.3073-29.878)  |
| ABSCCESS, PENIS                            | 0                                       | 0          | 6                                          | 1.5938        | 0(0-Inf)               |
| ABSCCESS, PERIANAL                         | 2                                       | 14.0192    | 79                                         | 19.7434       | 0.7101(0.1741-2.8969)  |
| ABSCCESS, PERIAPPENDICEAL                  | 2                                       | 15.5231    | 8                                          | 2.6928        | 5.7647(1.203-27.625)   |
| ABSCCESS, PERINEAL, DEEP                   | 0                                       | 0          | 2                                          | 1.399         | 0(0-Inf)               |
| ABSCCESS, PERINEPHRIC                      | 0                                       | 0          | 1                                          | 0.398         | 0(0-Inf)               |



| Description                                             | No. of Positive Cases with Disease Code | Case Rate* | No. of Positive Controls with Disease Code | Control Rate* | Relative Risk (95%CI)  |
|---------------------------------------------------------|-----------------------------------------|------------|--------------------------------------------|---------------|------------------------|
| ABSCCESS, PERINEUM                                      | 0                                       | 0          | 31                                         | 7.91          | 0(0-Inf)               |
| ABSCCESS, PERIODONTAL                                   | 10                                      | 72.5691    | 349                                        | 83.7832       | 0.8662(0.4613-1.6265)  |
| ABSCCESS, PERIRECTAL                                    | 4                                       | 29.1199    | 61                                         | 18.5951       | 1.566(0.5672-4.3235)   |
| ABSCCESS, PERIRENAL                                     | 0                                       | 0          | 1                                          | 0.234         | 0(0-Inf)               |
| ABSCCESS, PERITONEAL                                    | 1                                       | 6.9652     | 3                                          | 0.7412        | 9.3977(0.9429-93.6637) |
| ABSCCESS, PERITONSILLAR                                 | 1                                       | 7.9576     | 34                                         | 8.5882        | 0.9266(0.1263-6.796)   |
| ABSCCESS, PERIURETHRAL                                  | 0                                       | 0          | 2                                          | 0.8097        | 0(0-Inf)               |
| ABSCCESS, PHARYNX                                       | 0                                       | 0          | 3                                          | 0.7798        | 0(0-Inf)               |
| ABSCCESS, PILONIDAL                                     | 0                                       | 0          | 8                                          | 3.4711        | 0(0-Inf)               |
| ABSCCESS, POSTAURICULAR                                 | 0                                       | 0          | 7                                          | 1.9963        | 0(0-Inf)               |
| ABSCCESS, POSTOP. CODE ALSO BY SITE IF STATED           | 6                                       | 51.3052    | 133                                        | 52.0787       | 0.9851(0.4338-2.2375)  |
| ABSCCESS, PROSTATE                                      | 0                                       | 0          | 5                                          | 2.4581        | 0(0-Inf)               |
| ABSCCESS, PSOAS, NOS                                    | 1                                       | 6.9312     | 7                                          | 1.7607        | 3.9367(0.4751-32.6189) |
| ABSCCESS, RECTAL                                        | 0                                       | 0          | 14                                         | 3.9074        | 0(0-Inf)               |
| ABSCCESS, RETROPHARYNGEAL                               | 0                                       | 0          | 4                                          | 2.1576        | 0(0-Inf)               |
| ABSCCESS, SALIVARY                                      | 0                                       | 0          | 1                                          | 1.9071        | 0(0-Inf)               |
| ABSCCESS, SCALP                                         | 1                                       | 7.0711     | 7                                          | 1.6582        | 4.2642(0.5138-35.3893) |
| ABSCCESS, SCROTUM                                       | 2                                       | 24.3189    | 7                                          | 4.6003        | 5.2864(1.0863-25.7261) |
| ABSCCESS, SPINAL CORD (ANY PART)                        | 0                                       | 0          | 2                                          | 0.7897        | 0(0-Inf)               |
| ABSCCESS, SPLEEN                                        | 0                                       | 0          | 1                                          | 0.8878        | 0(0-Inf)               |
| ABSCCESS, STITCH                                        | 3                                       | 20.8436    | 75                                         | 18.8561       | 1.1054(0.3474-3.5174)  |
| ABSCCESS, STOMAL, CODE ALSO COMPLICATION BY SITE STATED | 0                                       | 0          | 2                                          | 1.1971        | 0(0-Inf)               |
| ABSCCESS, SUBHEPATIC                                    | 0                                       | 0          | 2                                          | 0.7896        | 0(0-Inf)               |
| ABSCCESS, SUBLINGUAL                                    | 0                                       | 0          | 2                                          | 1.1971        | 0(0-Inf)               |
| ABSCCESS, SUBMANDIBULAR                                 | 0                                       | 0          | 6                                          | 2.7554        | 0(0-Inf)               |
| ABSCCESS, SUBMAXILLARY                                  | 0                                       | 0          | 2                                          | 0.6774        | 0(0-Inf)               |
| ABSCCESS, SUBMENTAL                                     | 0                                       | 0          | 2                                          | 2.5439        | 0(0-Inf)               |
| ABSCCESS, SUBPHRENIC                                    | 0                                       | 0          | 2                                          | 0.7896        | 0(0-Inf)               |
| ABSCCESS, SUBUNGUAL                                     | 3                                       | 23.7484    | 32                                         | 11.0777       | 2.1438(0.652-7.0485)   |
| ABSCCESS, TOE                                           | 4                                       | 42.3332    | 50                                         | 27.1886       | 1.557(0.56-4.3289)     |
| ABSCCESS, TONGUE                                        | 0                                       | 0          | 2                                          | 1.1619        | 0(0-Inf)               |
| ABSCCESS, TONSIL                                        | 0                                       | 0          | 3                                          | 0.7972        | 0(0-Inf)               |
| ABSCCESS, TOOTH                                         | 50                                      | 365.0404   | 1548                                       | 420.6879      | 0.8677(0.6543-1.1508)  |
| ABSCCESS, TRUNK                                         | 6                                       | 43.8256    | 151                                        | 44.943        | 0.9751(0.4303-2.2099)  |
| ABSCCESS, TUBO-OVARIAN                                  | 1                                       | 8.1284     | 7                                          | 1.5312        | 5.3085(0.6384-44.1449) |
| ABSCCESS, TUBO-OVARIAN, SECONDARY                       | 0                                       | 0          | 1                                          | 0.2354        | 0(0-Inf)               |
| ABSCCESS, VAGINAL                                       | 0                                       | 0          | 3                                          | 0.6536        | 0(0-Inf)               |
| ABSCCESS, VULVAR                                        | 0                                       | 0          | 14                                         | 8.2782        | 0(0-Inf)               |
| ABSCCESS, WRIST                                         | 0                                       | 0          | 4                                          | 1.0351        | 0(0-Inf)               |
| ABSENCE, ACQUIRED, NEC                                  | 5                                       | 37.8779    | 154                                        | 48.926        | 0.7742(0.317-1.8905)   |

| Description                                                | No. of Positive Cases with Disease Code | Case Rate* | No. of Positive Controls with Disease Code | Control Rate* | Relative Risk (95%CI)  |
|------------------------------------------------------------|-----------------------------------------|------------|--------------------------------------------|---------------|------------------------|
| ABSENCE, ADRENAL, PARTIAL, ACQUIRED                        | 0                                       | 0          | 1                                          | 0.8877        | 0(0-Inf)               |
| ABSENCE, ADRENAL, TOTAL, ACQUIRED                          | 0                                       | 0          | 9                                          | 4.207         | 0(0-Inf)               |
| ABSENCE, APPENDIX, ACQUIRED                                | 9                                       | 77.34      | 306                                        | 121.2391      | 0.6379(0.3283-1.2395)  |
| ABSENCE, ARM, CONGENITAL                                   | 0                                       | 0          | 1                                          | 6.4779        | 0(0-Inf)               |
| ABSENCE, BLADDER, TOTAL OR PARTIAL, ACQUIRED               | 4                                       | 50.0371    | 55                                         | 37.601        | 1.3307(0.4808-3.683)   |
| ABSENCE, BOWEL SOUNDS                                      | 0                                       | 0          | 1                                          | 0.3526        | 0(0-Inf)               |
| ABSENCE, BREAST, CONGENITAL                                | 0                                       | 0          | 2                                          | 1.1613        | 0(0-Inf)               |
| ABSENCE, BREAST, TOTAL (UNILATERAL OR BILATERAL), ACQUIRED | 10                                      | 74.7153    | 394                                        | 120.8803      | 0.6181(0.3295-1.1595)  |
| ABSENCE, COLON, NOS, ACQUIRED                              | 6                                       | 57.8999    | 92                                         | 43.5626       | 1.3291(0.5802-3.0446)  |
| ABSENCE, COLON, PARTIAL, ACQUIRED                          | 26                                      | 272.0595   | 454                                        | 240.3114      | 1.1321(0.7616-1.683)   |
| ABSENCE, COLON, TOTAL, ACQUIRED                            | 1                                       | 7.2471     | 32                                         | 9.503         | 0.7626(0.1038-5.6054)  |
| ABSENCE, EAR, NOS, CONGENITAL                              | 0                                       | 0          | 1                                          | 0.2354        | 0(0-Inf)               |
| ABSENCE, EYE, ACQUIRED                                     | 3                                       | 22.1284    | 13                                         | 4.0553        | 5.4566(1.5355-19.3912) |
| ABSENCE, FALLOPIAN TUBE, NOS (ACQUIRED)                    | 13                                      | 188.6063   | 383                                        | 215.9198      | 0.8735(0.5017-1.5207)  |
| ABSENCE, FIBULA, CONGENITAL                                | 0                                       | 0          | 1                                          | 0.234         | 0(0-Inf)               |
| ABSENCE, FOREARM, CONGENITAL                               | 0                                       | 0          | 1                                          | 2.4924        | 0(0-Inf)               |
| ABSENCE, GALLBLADDER, PARTIAL, ACQUIRED                    | 0                                       | 0          | 5                                          | 2.3435        | 0(0-Inf)               |
| ABSENCE, GALLBLADDER, TOTAL, ACQUIRED                      | 17                                      | 139.2363   | 670                                        | 245.4097      | 0.5674(0.3503-0.919)   |
| ABSENCE, GENITAL ORGAN, MALE, CONGENITAL                   | 0                                       | 0          | 1                                          | 0.3528        | 0(0-Inf)               |
| ABSENCE, GENITAL ORGAN, NEC, ACQUIRED                      | 1                                       | 20.6383    | 13                                         | 13.7528       | 1.5007(0.1952-11.5386) |
| ABSENCE, INTESTINE, SMALL, PARTIAL, ACQUIRED               | 0                                       | 0          | 38                                         | 14.8425       | 0(0-Inf)               |
| ABSENCE, INTESTINE, SMALL, TOTAL, ACQUIRED                 | 0                                       | 0          | 2                                          | 0.5908        | 0(0-Inf)               |
| ABSENCE, KIDNEY, CONGENITAL                                | 0                                       | 0          | 4                                          | 1.5796        | 0(0-Inf)               |
| ABSENCE, KIDNEY, PARTIAL, ACQUIRED                         | 1                                       | 9.5395     | 40                                         | 18.7565       | 0.5086(0.0697-3.7094)  |
| ABSENCE, KIDNEY, TOTAL, ACQUIRED                           | 14                                      | 124.7584   | 151                                        | 62.8203       | 1.986(1.1455-3.4431)   |
| ABSENCE, LARYNX, ACQUIRED                                  | 2                                       | 20.6894    | 13                                         | 6.8341        | 3.0274(0.6772-13.5343) |
| ABSENCE, LIMB, CONGENITAL                                  | 0                                       | 0          | 1                                          | 0.4751        | 0(0-Inf)               |
| ABSENCE, LIVER, PARTIAL, ACQUIRED                          | 1                                       | 8.9243     | 4                                          | 1.6895        | 5.2822(0.5772-48.3382) |
| ABSENCE, LUNG, PARTIAL, ACQUIRED, (LOBECTOMY)              | 4                                       | 35.6066    | 143                                        | 60.0728       | 0.5927(0.2191-1.6037)  |
| ABSENCE, LUNG, TOTAL, ACQUIRED, (PNEUMONECTOMY)            | 0                                       | 0          | 22                                         | 8.6924        | 0(0-Inf)               |
| ABSENCE, MUSCLE, NEC                                       | 0                                       | 0          | 1                                          | 2.4872        | 0(0-Inf)               |
| ABSENCE, NAIL                                              | 0                                       | 0          | 1                                          | 0.8528        | 0(0-Inf)               |
| ABSENCE, NIPPLE                                            | 0                                       | 0          | 1                                          | 0.234         | 0(0-Inf)               |
| ABSENCE, ORGAN, NEC                                        | 0                                       | 0          | 1                                          | 0.8528        | 0(0-Inf)               |
| ABSENCE, OVARIES (BILATERAL), ACQUIRED                     | 13                                      | 188.1929   | 374                                        | 208.1343      | 0.9042(0.5192-1.5745)  |
| ABSENCE, OVARY, NOS (ACQUIRED)                             | 6                                       | 86.6516    | 142                                        | 79.5721       | 1.089(0.4796-2.4723)   |
| ABSENCE, PANCREAS, PARTIAL, ACQUIRED                       | 0                                       | 0          | 6                                          | 3.6271        | 0(0-Inf)               |
| ABSENCE, PANCREAS, TOTAL, ACQUIRED                         | 0                                       | 0          | 3                                          | 0.746         | 0(0-Inf)               |
| ABSENCE, PARATHYROID, ACQUIRED                             | 2                                       | 14.4106    | 44                                         | 12.464        | 1.1562(0.2788-4.7947)  |

| Description                                           | No. of Positive Cases with Disease Code | Case Rate* | No. of Positive Controls with Disease Code | Control Rate* | Relative Risk (95%CI)   |
|-------------------------------------------------------|-----------------------------------------|------------|--------------------------------------------|---------------|-------------------------|
| ABSENCE, PECTORALIS MAJOR, CONGENITAL                 | 0                                       | 0          | 1                                          | 2.4872        | 0(0-Inf)                |
| ABSENCE, PENIS, ACQUIRED                              | 0                                       | 0          | 4                                          | 3.5512        | 0(0-Inf)                |
| ABSENCE, PERICARDIUM (CONGENITAL#)                    | 0                                       | 0          | 2                                          | 1.0786        | 0(0-Inf)                |
| ABSENCE, PROSTATE, PARTIAL, ACQUIRED (TUR)            | 31                                      | 470.2108   | 468                                        | 398.6521      | 1.1795(0.8193-1.698)    |
| ABSENCE, PROSTATE, TOTAL, ACQUIRED                    | 26                                      | 493.898    | 452                                        | 417.6167      | 1.1827(0.7957-1.7577)   |
| ABSENCE, PULSE                                        | 1                                       | 10.2718    | 27                                         | 14.0357       | 0.7318(0.099-5.4072)    |
| ABSENCE, RECTUM, PARTIAL, ACQUIRED                    | 0                                       | 0          | 11                                         | 4.3109        | 0(0-Inf)                |
| ABSENCE, RECTUM, TOTAL, ACQUIRED                      | 0                                       | 0          | 17                                         | 8.4806        | 0(0-Inf)                |
| ABSENCE, SEIZURE                                      | 0                                       | 0          | 1                                          | 0.2354        | 0(0-Inf)                |
| ABSENCE, SEMINAL TRACT OR DUCT, ACQUIRED              | 0                                       | 0          | 1                                          | 0.8888        | 0(0-Inf)                |
| ABSENCE, SPLEEN, ACQUIRED                             | 4                                       | 29.1869    | 67                                         | 19.8495       | 1.4704(0.5339-4.0495)   |
| ABSENCE, STOMACH, PARTIAL, ACQUIRED                   | 3                                       | 30.0531    | 37                                         | 18.4835       | 1.6259(0.4989-5.2991)   |
| ABSENCE, STOMACH, TOTAL, ACQUIRED                     | 1                                       | 9.3948     | 8                                          | 3.6439        | 2.5782(0.3182-20.8934)  |
| ABSENCE, TESTIS, ACQUIRED                             | 6                                       | 203.2954   | 75                                         | 149.2979      | 1.3617(0.5918-3.1333)   |
| ABSENCE, TESTIS, CONGENITAL                           | 1                                       | 7.2227     | 2                                          | 0.53          | 13.6278(1.1997-154.799) |
| ABSENCE, THYROID, SURGICAL C SYMPTOMS                 | 0                                       | 0          | 2                                          | 0.432         | 0(0-Inf)                |
| ABSENCE, THYROID, TOTAL OR PARTIAL, ACQUIRED          | 10                                      | 78.1446    | 222                                        | 73.5614       | 1.0623(0.5625-2.0062)   |
| ABSENCE, TOE, NOS (ACQUIRED)                          | 0                                       | 0          | 3                                          | 0.8186        | 0(0-Inf)                |
| ABSENCE, TOOTH, (CONGENITAL) NOS                      | 0                                       | 0          | 3                                          | 0.7884        | 0(0-Inf)                |
| ABSENCE, TOOTH, ACQUIRED                              | 7                                       | 62.6183    | 281                                        | 118.745       | 0.5273(0.2488-1.1177)   |
| ABSENCE, TOOTH, ACQUIRED, WITH MALOCCLUSION           | 0                                       | 0          | 9                                          | 2.1532        | 0(0-Inf)                |
| ABSENCE, TOOTH, TRAUMATIC                             | 0                                       | 0          | 2                                          | 0.8097        | 0(0-Inf)                |
| ABSENCE, TOOTH, WITH MALOCCLUSION                     | 0                                       | 0          | 1                                          | 0.398         | 0(0-Inf)                |
| ABSENCE, TRACHEA                                      | 0                                       | 0          | 1                                          | 0.2728        | 0(0-Inf)                |
| ABSENCE, URETER, ACQUIRED                             | 1                                       | 12.5739    | 25                                         | 17.2226       | 0.7301(0.0986-5.4065)   |
| ABSENCE, UTERUS, NOS (CONGENITAL)                     | 0                                       | 0          | 1                                          | 0.234         | 0(0-Inf)                |
| ABSENCE, UTERUS, PARTIAL, ACQUIRED                    | 1                                       | 13.8936    | 12                                         | 6.0628        | 2.2916(0.2936-17.8863)  |
| ABSENCE, UTERUS, TOTAL, ACQUIRED                      | 40                                      | 579.1947   | 1323                                       | 667.8695      | 0.8672(0.6326-1.1889)   |
| ABSENCE, VAGINA, ACQUIRED                             | 0                                       | 0          | 7                                          | 2.1543        | 0(0-Inf)                |
| ABSENCE, VULVA, ACQUIRED                              | 0                                       | 0          | 4                                          | 2.8097        | 0(0-Inf)                |
| ABULIA                                                | 0                                       | 0          | 5                                          | 2.2757        | 0(0-Inf)                |
| ABUSE, ALCOHOL, SEE ALSO ALCOHOLIC--ABAL              | 24                                      | 172.4046   | 597                                        | 157.121       | 1.0973(0.7289-1.6519)   |
| ABUSE, CAFFEINE                                       | 2                                       | 14.0897    | 26                                         | 7.1421        | 1.9728(0.4648-8.373)    |
| ABUSE, DRUG, NOS, CODE ALSO EFFECT, ADVERSE BY DRUG   | 0                                       | 0          | 6                                          | 1.4351        | 0(0-Inf)                |
| ABUSE, DRUG, SEE DEPENDENCE, BY SPECIFIC DRUG         | 1                                       | 7.0751     | 19                                         | 4.5695        | 1.5483(0.2056-11.6628)  |
| ABUSE, LAXATIVE                                       | 0                                       | 0          | 6                                          | 2.4306        | 0(0-Inf)                |
| ABUSE, NEC / NOS (INCLUDES MENTAL, VERBAL, EMOTIONAL) | 2                                       | 17.3353    | 18                                         | 7.3325        | 2.3642(0.543-10.2936)   |
| ABUSE, NICORETTE GUM                                  | 0                                       | 0          | 2                                          | 0.5474        | 0(0-Inf)                |
| ABUSE, TOBACCO--ABTB                                  | 80                                      | 670.2545   | 2667                                       | 714.7484      | 0.9377(0.7504-1.1719)   |
| ABUSE, VOICE                                          | 1                                       | 9.1355     | 19                                         | 5.0831        | 1.7972(0.2388-13.527)   |

| Description                                                 | No. of Positive Cases with Disease Code | Case Rate* | No. of Positive Controls with Disease Code | Control Rate* | Relative Risk (95%CI)    |
|-------------------------------------------------------------|-----------------------------------------|------------|--------------------------------------------|---------------|--------------------------|
| ACALCULIA (DEVELOPMENTAL)                                   | 0                                       | 0          | 2                                          | 0.7896        | 0(0-Inf)                 |
| ACANTHOLYSIS                                                | 3                                       | 25.5126    | 27                                         | 10.587        | 2.4098(0.726-7.9984)     |
| ACANTHOMA, MALIGNANT, CODE ALSO NEOPLASM, MALIGNANT BY SITE | 0                                       | 0          | 1                                          | 0.2729        | 0(0-Inf)                 |
| ACANTHOMA, NOS, CODE ALSO NEOPLASM, BENIGN BY SITE          | 7                                       | 50.9826    | 113                                        | 33.2692       | 1.5324(0.7119-3.2988)    |
| ACANTHOSIS, GLYCOGENIC                                      | 1                                       | 7.6519     | 4                                          | 1.2938        | 5.9142(0.6428-54.4147)   |
| ACANTHOSIS, NIGRICANS                                       | 0                                       | 0          | 14                                         | 4.4654        | 0(0-Inf)                 |
| ACANTHOSIS, NOS                                             | 0                                       | 0          | 41                                         | 12.3034       | 0(0-Inf)                 |
| ACCESSORY, ATRIOVENTRICULAR CONDUCTION                      | 0                                       | 0          | 6                                          | 1.5077        | 0(0-Inf)                 |
| ACCESSORY, BREAST TISSUE                                    | 0                                       | 0          | 3                                          | 0.8034        | 0(0-Inf)                 |
| ACCESSORY, LOBE, LUNG                                       | 0                                       | 0          | 1                                          | 0.8879        | 0(0-Inf)                 |
| ACCESSORY, NAVICULAR                                        | 0                                       | 0          | 7                                          | 1.7638        | 0(0-Inf)                 |
| ACCESSORY, NAVICULAR (LOWER EXTREMITY NUMBER)               | 0                                       | 0          | 5                                          | 1.526         | 0(0-Inf)                 |
| ACCESSORY, NIPPLE                                           | 1                                       | 9.8743     | 3                                          | 0.7591        | 13.0083(1.3039-129.7761) |
| ACCESSORY, PATHWAYS                                         | 0                                       | 0          | 4                                          | 1.2654        | 0(0-Inf)                 |
| ACCESSORY, RENAL ARTERY                                     | 0                                       | 0          | 3                                          | 0.6985        | 0(0-Inf)                 |
| ACCESSORY, SALIVARY GLAND                                   | 1                                       | 12.765     | 2                                          | 0.6013        | 21.2307(1.8482-243.8822) |
| ACCESSORY, SKIN TAGS                                        | 0                                       | 0          | 1                                          | 0.2354        | 0(0-Inf)                 |
| ACCESSORY, TEETH                                            | 0                                       | 0          | 1                                          | 0.4048        | 0(0-Inf)                 |
| ACCIDENT, ALL TERRAIN VEHICLE (ATV)(4-WHEELER)              | 0                                       | 0          | 1                                          | 0.3526        | 0(0-Inf)                 |
| ACCIDENT, ANIMAL, CAUSED (KICKS, BITES, SCRATCHES, ETC.)    | 0                                       | 0          | 20                                         | 5.8296        | 0(0-Inf)                 |
| ACCIDENT, ARC WELDING, CAUSED                               | 2                                       | 41.5574    | 20                                         | 12.8046       | 3.2455(0.7537-13.9751)   |
| ACCIDENT, ATHLETIC ACTIVITY, NEC                            | 2                                       | 24.3459    | 7                                          | 2.3286        | 10.4553(2.1331-51.2448)  |
| ACCIDENT, AUGER                                             | 1                                       | 7.1717     | 1                                          | 0.3095        | 23.1711(1.3962-384.5548) |
| ACCIDENT, AUTOMOBILE--MVA                                   | 23                                      | 162.4053   | 841                                        | 220.3567      | 0.737(0.4866-1.1163)     |
| ACCIDENT, BICYCLE                                           | 1                                       | 7.1737     | 27                                         | 6.8745        | 1.0435(0.1411-7.716)     |
| ACCIDENT, BOWLING                                           | 0                                       | 0          | 1                                          | 0.2354        | 0(0-Inf)                 |
| ACCIDENT, BUS                                               | 0                                       | 0          | 1                                          | 0.398         | 0(0-Inf)                 |
| ACCIDENT, CAUGHT IN BETWEEN OBJECTS                         | 1                                       | 7.6911     | 1                                          | 0.3293        | 23.3558(1.3832-394.3629) |
| ACCIDENT, CEREBROVASCULAR, NOS --CVA                        | 38                                      | 540.9732   | 657                                        | 533.6975      | 1.0136(0.7303-1.4068)    |
| ACCIDENT, CEREBROVASCULAR, OLD                              | 45                                      | 598.286    | 730                                        | 541.8547      | 1.1041(0.8164-1.4932)    |
| ACCIDENT, CEREBROVASCULAR, RESIDUAL                         | 15                                      | 199.1965   | 337                                        | 256.4735      | 0.7767(0.4625-1.3041)    |
| ACCIDENT, CEREBROVASCULAR, WITH PARALYSIS                   | 0                                       | 0          | 30                                         | 16.1269       | 0(0-Inf)                 |
| ACCIDENT, CORN PICKER                                       | 1                                       | 7.1719     | 1                                          | 0.3096        | 23.1681(1.3959-384.5189) |
| ACCIDENT, DRUG OVERDOSE                                     | 1                                       | 13.6475    | 21                                         | 6.4277        | 2.1232(0.2837-15.8919)   |
| ACCIDENT, ELECTRIC CURRENT, CAUSED                          | 0                                       | 0          | 3                                          | 0.8188        | 0(0-Inf)                 |
| ACCIDENT, EXPLOSION, CAUSED                                 | 0                                       | 0          | 3                                          | 0.746         | 0(0-Inf)                 |
| ACCIDENT, FALL                                              | 127                                     | 1760.878   | 1997                                       | 1459.1674     | 1.2068(1.0081-1.4445)    |
| ACCIDENT, FALL FROM HORSE                                   | 0                                       | 0          | 5                                          | 1.3256        | 0(0-Inf)                 |
| ACCIDENT, FALLING OBJECT, CAUSED                            | 0                                       | 0          | 2                                          | 0.5475        | 0(0-Inf)                 |

| Description                                                                 | No. of Positive Cases with Disease Code | Case Rate* | No. of Positive Controls with Disease Code | Control Rate* | Relative Risk (95%CI)  |
|-----------------------------------------------------------------------------|-----------------------------------------|------------|--------------------------------------------|---------------|------------------------|
| ACCIDENT, FARM, NEC                                                         | 0                                       | 0          | 2                                          | 0.7897        | 0(0-Inf)               |
| ACCIDENT, FIREARM, CAUSED                                                   | 0                                       | 0          | 11                                         | 2.9112        | 0(0-Inf)               |
| ACCIDENT, FIREWORKS, CAUSED                                                 | 0                                       | 0          | 1                                          | 0.2729        | 0(0-Inf)               |
| ACCIDENT, GOLF                                                              | 0                                       | 0          | 2                                          | 0.4853        | 0(0-Inf)               |
| ACCIDENT, HIGH PRESSURE TOOL                                                | 0                                       | 0          | 2                                          | 1.0782        | 0(0-Inf)               |
| ACCIDENT, HOT SUBSTANCE, CAUSED                                             | 0                                       | 0          | 2                                          | 1.7767        | 0(0-Inf)               |
| ACCIDENT, ICE SKATE                                                         | 0                                       | 0          | 1                                          | 0.8879        | 0(0-Inf)               |
| ACCIDENT, KNIFE, CAUSED                                                     | 0                                       | 0          | 7                                          | 1.8053        | 0(0-Inf)               |
| ACCIDENT, LAWN MOWER                                                        | 0                                       | 0          | 25                                         | 6.6921        | 0(0-Inf)               |
| ACCIDENT, LIGHTNING                                                         | 0                                       | 0          | 2                                          | 0.8096        | 0(0-Inf)               |
| ACCIDENT, MACHINERY, CAUSED                                                 | 1                                       | 9.1244     | 23                                         | 6.7432        | 1.3531(0.1819-10.0666) |
| ACCIDENT, MOPED                                                             | 0                                       | 0          | 1                                          | 0.398         | 0(0-Inf)               |
| ACCIDENT, MOTORCYCLE                                                        | 0                                       | 0          | 23                                         | 7.8633        | 0(0-Inf)               |
| ACCIDENT, NEC AND NOS                                                       | 1                                       | 6.9202     | 22                                         | 5.6323        | 1.2287(0.1646-9.1713)  |
| ACCIDENT, PEDESTRIAN                                                        | 1                                       | 7.984      | 19                                         | 6.6623        | 1.1984(0.1593-9.0154)  |
| ACCIDENT, POISONING                                                         | 0                                       | 0          | 2                                          | 0.5069        | 0(0-Inf)               |
| ACCIDENT, POISONING FROM DRUG, CODE ALSO EFFECT, ADVERSE BY DRUG, IF STATED | 0                                       | 0          | 8                                          | 1.7968        | 0(0-Inf)               |
| ACCIDENT, SEWING MACHINE, CAUSED                                            | 0                                       | 0          | 1                                          | 0.234         | 0(0-Inf)               |
| ACCIDENT, SKIING, SNOW                                                      | 1                                       | 7.2312     | 5                                          | 1.2821        | 5.6401(0.6459-49.2519) |
| ACCIDENT, SKIING, WATER                                                     | 0                                       | 0          | 3                                          | 0.9282        | 0(0-Inf)               |
| ACCIDENT, SNOWBLOWER                                                        | 0                                       | 0          | 5                                          | 1.7635        | 0(0-Inf)               |
| ACCIDENT, SNOWMOBILE                                                        | 0                                       | 0          | 7                                          | 2.1899        | 0(0-Inf)               |
| ACCIDENT, SPORT, NEC                                                        | 0                                       | 0          | 12                                         | 5.3172        | 0(0-Inf)               |
| ACCIDENT, STEAM, CAUSED                                                     | 0                                       | 0          | 2                                          | 0.5709        | 0(0-Inf)               |
| ACCIDENT, TENNIS                                                            | 0                                       | 0          | 1                                          | 0.8879        | 0(0-Inf)               |
| ACCIDENT, THROWN OBJECT, CAUSED                                             | 0                                       | 0          | 1                                          | 0.2729        | 0(0-Inf)               |
| ACCIDENT, TOOLS, CUTTING/PIERCING                                           | 1                                       | 17.3829    | 11                                         | 9.2036        | 1.8887(0.242-14.7413)  |
| ACCIDENT, TOOLS, MOTORIZED, CAUSED                                          | 2                                       | 13.7876    | 76                                         | 20.6179       | 0.6687(0.1639-2.7283)  |
| ACCIDENT, TOOLS, NON-MOTORIZED, CAUSED                                      | 0                                       | 0          | 4                                          | 1.5896        | 0(0-Inf)               |
| ACCIDENT, TRACTOR                                                           | 0                                       | 0          | 5                                          | 1.8564        | 0(0-Inf)               |
| ACCIDENT, TRUCK                                                             | 0                                       | 0          | 2                                          | 0.6777        | 0(0-Inf)               |
| ACCIDENT, VOLLEYBALL                                                        | 0                                       | 0          | 1                                          | 0.4751        | 0(0-Inf)               |
| ACCIDENT, WAR CAUSED                                                        | 0                                       | 0          | 1                                          | 0.8877        | 0(0-Inf)               |
| ACCIDENT, WASHING MACHINE, CAUSED                                           | 0                                       | 0          | 1                                          | 0.8536        | 0(0-Inf)               |
| ACCIDENT, WRESTLING                                                         | 1                                       | 11.67      | 0                                          | 0             | 8828324786.6574(0-Inf) |
| ACHALASIA, NOS                                                              | 1                                       | 7.3672     | 24                                         | 7.3884        | 0.9971(0.1341-7.4121)  |
| ACHALASIA, VIGOROUS                                                         | 0                                       | 0          | 1                                          | 0.2729        | 0(0-Inf)               |
| ACHLORHYDRIA, NOS                                                           | 1                                       | 6.9622     | 8                                          | 1.9977        | 3.4852(0.4275-28.4105) |
| ACHONDROPLASIA                                                              | 0                                       | 0          | 1                                          | 0.4049        | 0(0-Inf)               |

| Description                                              | No. of Positive Cases with Disease Code | Case Rate* | No. of Positive Controls with Disease Code | Control Rate* | Relative Risk (95%CI)    |
|----------------------------------------------------------|-----------------------------------------|------------|--------------------------------------------|---------------|--------------------------|
| ACIDEMIA, NOS                                            | 1                                       | 8.0718     | 2                                          | 0.7121        | 11.336(0.9849-130.4749)  |
| ACIDOSIS, LACTIC                                         | 1                                       | 9.7055     | 10                                         | 4.7795        | 2.0306(0.2572-16.0349)   |
| ACIDOSIS, METABOLIC                                      | 3                                       | 32.6958    | 54                                         | 30.6594       | 1.0664(0.3323-3.4219)    |
| ACIDOSIS, NOS, SEE ALSO KETO-ACIDOSIS                    | 2                                       | 19.3098    | 17                                         | 8.1142        | 2.3798(0.5448-10.3954)   |
| ACIDOSIS, RENAL                                          | 0                                       | 0          | 1                                          | 0.2354        | 0(0-Inf)                 |
| ACIDOSIS, RENAL, TUBULAR                                 | 0                                       | 0          | 13                                         | 5.5984        | 0(0-Inf)                 |
| ACIDOSIS, RESPIRATORY                                    | 0                                       | 0          | 13                                         | 9.2696        | 0(0-Inf)                 |
| ACIDOSIS, RESPIRATORY, COMPLICATED BY METABOLIC ACIDOSIS | 0                                       | 0          | 1                                          | 0.4048        | 0(0-Inf)                 |
| ACIDURIA (OROTIC)                                        | 0                                       | 0          | 1                                          | 0.398         | 0(0-Inf)                 |
| ACNE, CONGLOBATA                                         | 0                                       | 0          | 1                                          | 0.398         | 0(0-Inf)                 |
| ACNE, CYSTIC--ACNC                                       | 0                                       | 0          | 33                                         | 13.2892       | 0(0-Inf)                 |
| ACNE, EXCORIEE/EXCORIATED                                | 1                                       | 13.5833    | 7                                          | 2.2232        | 6.1097(0.7383-50.5626)   |
| ACNE, KELOIDALIS/KELOID                                  | 0                                       | 0          | 2                                          | 0.5458        | 0(0-Inf)                 |
| ACNE, MILIARIS                                           | 0                                       | 0          | 3                                          | 1.5102        | 0(0-Inf)                 |
| ACNE, NECROTICA                                          | 1                                       | 9.4083     | 5                                          | 1.2639        | 7.4439(0.8471-65.4103)   |
| ACNE, NOS--ACN                                           | 4                                       | 42.0531    | 309                                        | 81.8899       | 0.5135(0.1913-1.3784)    |
| ACNE, ROSACEA                                            | 34                                      | 243.176    | 846                                        | 217.3336      | 1.1189(0.7933-1.5782)    |
| ACNE, SCARRING                                           | 0                                       | 0          | 26                                         | 6.6536        | 0(0-Inf)                 |
| ACNE, VULGARIS--ACNV                                     | 1                                       | 19.9024    | 84                                         | 33.0904       | 0.6015(0.0836-4.3259)    |
| ACROCHORDON (SEE ALSO DERMATOFIBROMA)                    | 15                                      | 105.4331   | 567                                        | 140.1959      | 0.752(0.4499-1.2572)     |
| ACROCYANOSIS                                             | 2                                       | 14.743     | 22                                         | 6.6327        | 2.2228(0.518-9.5375)     |
| ACRODERMATITIS, CONTINUA                                 | 0                                       | 0          | 1                                          | 0.2354        | 0(0-Inf)                 |
| ACROKERATOELASTOIDOSIS (MARGINALIS)                      | 0                                       | 0          | 1                                          | 0.888         | 0(0-Inf)                 |
| ACROKERATOSIS, NOS, SEE ALSO KERATOSIS                   | 0                                       | 0          | 1                                          | 0.888         | 0(0-Inf)                 |
| ACROMEGALY, INACTIVE                                     | 1                                       | 7.1231     | 1                                          | 0.219         | 32.5315(1.8955-558.3129) |
| ACROMEGALY, NOS                                          | 1                                       | 7.2443     | 2                                          | 0.5748        | 12.6036(1.0906-145.6613) |
| ACROPARESTHESIA                                          | 0                                       | 0          | 11                                         | 2.527         | 0(0-Inf)                 |
| ACROSCLEROSIS                                            | 0                                       | 0          | 3                                          | 0.7022        | 0(0-Inf)                 |
| ACROTRICHOMA                                             | 2                                       | 14.6884    | 10                                         | 3.0611        | 4.7985(1.0359-22.2272)   |
| ACTINODERMATITIS                                         | 0                                       | 0          | 1                                          | 0.2729        | 0(0-Inf)                 |
| ACTINOMYCOSIS                                            | 0                                       | 0          | 3                                          | 1.1479        | 0(0-Inf)                 |
| ACUTE ABDOMEN                                            | 0                                       | 0          | 17                                         | 9.5363        | 0(0-Inf)                 |
| ADDUCTION, FOOT                                          | 0                                       | 0          | 1                                          | 0.234         | 0(0-Inf)                 |
| ADDUCTION, HIP                                           | 0                                       | 0          | 1                                          | 0.2354        | 0(0-Inf)                 |
| ADENITIS, MESENTERIC                                     | 0                                       | 0          | 1                                          | 0.234         | 0(0-Inf)                 |
| ADENITIS, NOS                                            | 0                                       | 0          | 37                                         | 8.8067        | 0(0-Inf)                 |
| ADENITIS, PAROTID GLAND                                  | 0                                       | 0          | 3                                          | 0.7063        | 0(0-Inf)                 |
| ADENITIS, SALIVARY DUCT OR GLAND, NOS                    | 0                                       | 0          | 1                                          | 0.8882        | 0(0-Inf)                 |
| ADENITIS, SUBMANDIBULAR GLAND                            | 0                                       | 0          | 8                                          | 1.9756        | 0(0-Inf)                 |

| Description                                               | No. of Positive Cases with Disease Code | Case Rate* | No. of Positive Controls with Disease Code | Control Rate* | Relative Risk (95%CI)  |
|-----------------------------------------------------------|-----------------------------------------|------------|--------------------------------------------|---------------|------------------------|
| ADENITIS, TUBERCULOUS                                     | 0                                       | 0          | 1                                          | 0.405         | 0(0-Inf)               |
| ADENOFIBROMA, NOS, CODE ALSO NEOPLASM, BENIGN BY SITE     | 0                                       | 0          | 9                                          | 2.2068        | 0(0-Inf)               |
| ADENOFIBROMA, PROSTATE                                    | 0                                       | 0          | 2                                          | 1.0787        | 0(0-Inf)               |
| ADENOIDITIS, NOS                                          | 0                                       | 0          | 4                                          | 0.9521        | 0(0-Inf)               |
| ADENOMA, CERVIX, BENIGN                                   | 1                                       | 41.37      | 25                                         | 18.63         | 2.2206(0.2999-16.4432) |
| ADENOMA, CHROMOPHOBE (PITUITARY)                          | 0                                       | 0          | 2                                          | 1.0783        | 0(0-Inf)               |
| ADENOMA, COLORECTAL/RECTOSIGMOID (JUNCTION)               | 4                                       | 33.6993    | 57                                         | 21.9556       | 1.5349(0.5546-4.2475)  |
| ADENOMA, ENDOMETRIUM, BENIGN                              | 0                                       | 0          | 74                                         | 39.1428       | 0(0-Inf)               |
| ADENOMA, HURTHLE CELL                                     | 0                                       | 0          | 28                                         | 6.5869        | 0(0-Inf)               |
| ADENOMA, INTESTINE, LARGE, BENIGN                         | 71                                      | 589.3624   | 1740                                       | 622.3438      | 0.947(0.7465-1.2014)   |
| ADENOMA, INTESTINE, NOS, BENIGN                           | 0                                       | 0          | 11                                         | 3.918         | 0(0-Inf)               |
| ADENOMA, INTESTINE, SMALL, BENIGN                         | 1                                       | 9.9234     | 12                                         | 5.9379        | 1.6712(0.2154-12.9685) |
| ADENOMA, MALIGNANT, CODE ALSO NEOPLASM, MALIGNANT BY SITE | 3                                       | 24.2204    | 103                                        | 36.9246       | 0.6559(0.2076-2.0721)  |
| ADENOMA, MALIGNUM, CODE ALSO NEOPLASM MALIGNANT BY SITE   | 0                                       | 0          | 1                                          | 0.4049        | 0(0-Inf)               |
| ADENOMA, NOS, CODE ALSO NEOPLASM, BENIGN BY SITE          | 4                                       | 29.9633    | 205                                        | 64.212        | 0.4666(0.1733-1.2568)  |
| ADENOMA, NULL CELL (PITUITARY)                            | 0                                       | 0          | 3                                          | 1.9013        | 0(0-Inf)               |
| ADENOMA, OXYPHILIC/OXYPHIL CELL (THYROID)                 | 0                                       | 0          | 2                                          | 0.7898        | 0(0-Inf)               |
| ADENOMA, PARATHYROID, BENIGN                              | 11                                      | 77.6224    | 124                                        | 29.4414       | 2.6365(1.4167-4.9066)  |
| ADENOMA, PAROTID, BENIGN                                  | 1                                       | 7.6924     | 14                                         | 3.3678        | 2.2841(0.2971-17.5623) |
| ADENOMA, PITUITARY, BENIGN                                | 3                                       | 27.8018    | 36                                         | 16.0444       | 1.7328(0.5308-5.6563)  |
| ADENOMA, PLEOMORPHIC (CODE ALSO NEO. BENIGN BY SITE)      | 1                                       | 7.0085     | 28                                         | 7.4437        | 0.9415(0.1274-6.9599)  |
| ADENOMA, PROLACTIN PRODUCING                              | 0                                       | 0          | 3                                          | 0.7885        | 0(0-Inf)               |
| ADENOMA, PROSTATE, BENIGN                                 | 2                                       | 46.3736    | 86                                         | 106.7153      | 0.4346(0.1068-1.7679)  |
| ADENOMA, RECTUM, BENIGN                                   | 16                                      | 117.5043   | 501                                        | 150.899       | 0.7787(0.4728-1.2824)  |
| ADENOMA, THYROID, NOS, SEE ALSO GOITER, NODULAR           | 1                                       | 7.5619     | 40                                         | 12.6032       | 0.6(0.0822-4.3821)     |
| ADENOMA, TUBULOVILLOUS CODE ALSO ADENOMA BY SITE STATED   | 9                                       | 78.0034    | 259                                        | 104.4378      | 0.7469(0.3837-1.4538)  |
| ADENOMATOUS THYROID SEE ALSO GOITER NODULAR               | 2                                       | 15.0839    | 57                                         | 13.2545       | 1.138(0.2766-4.6819)   |
| ADENOMYOEPITHELIOMA, CODE ALSO NEO. BENIGN BY SITE        | 0                                       | 0          | 1                                          | 0.4048        | 0(0-Inf)               |
| ADENOMYOMA, NOS, CODE ALSO NEOPLASM, BENIGN BY SITE       | 0                                       | 0          | 31                                         | 7.248         | 0(0-Inf)               |
| ADENOMYOMATOSIS, OF OVARY                                 | 0                                       | 0          | 1                                          | 0.8274        | 0(0-Inf)               |
| ADENOMYOSIS, CERVIX                                       | 0                                       | 0          | 3                                          | 0.6536        | 0(0-Inf)               |
| ADENOMYOSIS, FALLOPIAN TUBE                               | 0                                       | 0          | 1                                          | 0.234         | 0(0-Inf)               |
| ADENOMYOSIS, MYOMETRIUM                                   | 1                                       | 16.1619    | 51                                         | 22.3164       | 0.7242(0.0997-5.2602)  |
| ADENOMYOSIS, MYOMETRIUM, DIFFUSE                          | 0                                       | 0          | 2                                          | 0.796         | 0(0-Inf)               |
| ADENOMYOSIS, NOS, SEE ALSO ENDOMETRIOSIS                  | 1                                       | 17.8038    | 25                                         | 11.2924       | 1.5766(0.2121-11.7183) |
| ADENOMYOSIS, UTERUS                                       | 3                                       | 78.1602    | 93                                         | 51.2156       | 1.5261(0.4821-4.8311)  |
| ADENOMYOSIS, UTERUS, DIFFUSE                              | 0                                       | 0          | 2                                          | 0.5838        | 0(0-Inf)               |

| Description                                       | No. of Positive Cases with Disease Code | Case Rate* | No. of Positive Controls with Disease Code | Control Rate* | Relative Risk (95%CI)  |
|---------------------------------------------------|-----------------------------------------|------------|--------------------------------------------|---------------|------------------------|
| ADENOPATHY                                        | 17                                      | 118.8422   | 357                                        | 90.8346       | 1.3083(0.8028-2.1321)  |
| ADENOPHARYNGITIS                                  | 0                                       | 0          | 1                                          | 0.398         | 0(0-Inf)               |
| ADENOSARCOMA CODE ALSO NEOPLASM MALIGNANT BY SITE | 0                                       | 0          | 1                                          | 0.8529        | 0(0-Inf)               |
| ADENOSIS, BREAST                                  | 7                                       | 124.8181   | 184                                        | 83.6624       | 1.4919(0.6996-3.1816)  |
| ADENOSIS, VAGINAL                                 | 0                                       | 0          | 3                                          | 0.7022        | 0(0-Inf)               |
| ADHESION, ABDOMINAL                               | 0                                       | 0          | 33                                         | 12.8579       | 0(0-Inf)               |
| ADHESION, BLADDER                                 | 0                                       | 0          | 3                                          | 0.8119        | 0(0-Inf)               |
| ADHESION, CERVIX                                  | 0                                       | 0          | 2                                          | 0.432         | 0(0-Inf)               |
| ADHESION, CLITORIS                                | 0                                       | 0          | 1                                          | 0.2354        | 0(0-Inf)               |
| ADHESION, COLON                                   | 0                                       | 0          | 10                                         | 2.5439        | 0(0-Inf)               |
| ADHESION, FORESKIN                                | 0                                       | 0          | 5                                          | 3.6209        | 0(0-Inf)               |
| ADHESION, ILEUM                                   | 0                                       | 0          | 2                                          | 1.1974        | 0(0-Inf)               |
| ADHESION, INTESTINE, LARGE                        | 0                                       | 0          | 10                                         | 2.3876        | 0(0-Inf)               |
| ADHESION, INTESTINE, LARGE, WITH OBSTRUCTION      | 0                                       | 0          | 1                                          | 0.8888        | 0(0-Inf)               |
| ADHESION, INTESTINE, NEC                          | 0                                       | 0          | 6                                          | 1.3838        | 0(0-Inf)               |
| ADHESION, INTESTINE, NEC, WITH OBSTRUCTION        | 0                                       | 0          | 1                                          | 0.234         | 0(0-Inf)               |
| ADHESION, INTESTINE, SMALL, NEC                   | 1                                       | 7.2988     | 20                                         | 5.904         | 1.2362(0.1647-9.2797)  |
| ADHESION, INTESTINE, SMALL, WITH OBSTRUCTION      | 0                                       | 0          | 65                                         | 19.3583       | 0(0-Inf)               |
| ADHESION, JOINT, LOWER EXTREMITY                  | 1                                       | 6.9582     | 16                                         | 4.0609        | 1.7135(0.2249-13.0525) |
| ADHESION, JOINT, NOS                              | 0                                       | 0          | 2                                          | 0.5069        | 0(0-Inf)               |
| ADHESION, JOINT, UPPER EXTREMITY                  | 0                                       | 0          | 12                                         | 3.0081        | 0(0-Inf)               |
| ADHESION, LABIA                                   | 0                                       | 0          | 4                                          | 0.9419        | 0(0-Inf)               |
| ADHESION, MENINGES                                | 0                                       | 0          | 1                                          | 2.4889        | 0(0-Inf)               |
| ADHESION, NASAL                                   | 0                                       | 0          | 1                                          | 0.2729        | 0(0-Inf)               |
| ADHESION, NOS (GI#)                               | 0                                       | 0          | 7                                          | 2.0947        | 0(0-Inf)               |
| ADHESION, OCULAR MUSCLE                           | 0                                       | 0          | 1                                          | 0.2354        | 0(0-Inf)               |
| ADHESION, OMENTUM, SEE ALSO ADHESION, INTESTINE   | 0                                       | 0          | 1                                          | 0.2354        | 0(0-Inf)               |
| ADHESION, OVARY                                   | 0                                       | 0          | 9                                          | 2.5514        | 0(0-Inf)               |
| ADHESION, PELVIC FEMALE                           | 0                                       | 0          | 6                                          | 1.5038        | 0(0-Inf)               |
| ADHESION, PERICARDIUM, NOS                        | 0                                       | 0          | 1                                          | 0.3526        | 0(0-Inf)               |
| ADHESION, PERITONEAL, FEMALE                      | 0                                       | 0          | 20                                         | 9.8916        | 0(0-Inf)               |
| ADHESION, PERITONEAL, MALE                        | 0                                       | 0          | 1                                          | 0.3526        | 0(0-Inf)               |
| ADHESION, PERITONEAL, NOS                         | 0                                       | 0          | 1                                          | 0.2729        | 0(0-Inf)               |
| ADHESION, PERITONEAL, WITH INTESTINAL OBSTRUCTION | 0                                       | 0          | 1                                          | 0.8881        | 0(0-Inf)               |
| ADHESION, PERITUBAL                               | 0                                       | 0          | 2                                          | 1.1379        | 0(0-Inf)               |
| ADHESION, PLEURAL                                 | 0                                       | 0          | 5                                          | 1.3505        | 0(0-Inf)               |
| ADHESION, TENDON                                  | 0                                       | 0          | 11                                         | 2.7466        | 0(0-Inf)               |
| ADHESION, TUBO-OVARIAN                            | 0                                       | 0          | 19                                         | 11.2848       | 0(0-Inf)               |
| ADHESION, UTERUS                                  | 1                                       | 28.5618    | 16                                         | 9.33          | 3.0613(0.4029-23.2592) |
| ADHESION, VAGINA                                  | 0                                       | 0          | 11                                         | 4.7572        | 0(0-Inf)               |



| Description                                                             | No. of Positive Cases with Disease Code | Case Rate* | No. of Positive Controls with Disease Code | Control Rate* | Relative Risk (95%CI)   |
|-------------------------------------------------------------------------|-----------------------------------------|------------|--------------------------------------------|---------------|-------------------------|
| ADHESION, VITREORETINAL                                                 | 0                                       | 0          | 1                                          | 0.2729        | 0(0-Inf)                |
| ADIE'S PUPIL                                                            | 1                                       | 7.8761     | 23                                         | 5.2997        | 1.4861(0.1992-11.0852)  |
| ADIPOSITAS (CONDITION)(OBESITY #)                                       | 0                                       | 0          | 1                                          | 0.234         | 0(0-Inf)                |
| ADIPOSITA, HEART                                                        | 0                                       | 0          | 1                                          | 0.8528        | 0(0-Inf)                |
| ADIPOSITA, NOS (SEE ALSO FAT PAD)                                       | 0                                       | 0          | 9                                          | 2.3903        | 0(0-Inf)                |
| ADJUSTMENT, SPEECH PROCESSOR/HEARING DEVICE/COCHLEAR IMPLANT            | 3                                       | 36.2763    | 5                                          | 3.2501        | 11.1617(2.6217-47.5203) |
| ADMISSION, PRS TEST/XRAY ONLY                                           | 14                                      | 98.7352    | 421                                        | 112.194       | 0.88(0.516-1.501)       |
| ADMISSION, ALBERT LEA                                                   | 0                                       | 0          | 5                                          | 1.1874        | 0(0-Inf)                |
| ADMISSION, ALCOHOLIC TREATMENT UNIT--ADDU                               | 0                                       | 0          | 10                                         | 2.4562        | 0(0-Inf)                |
| ADMISSION, AUSTIN                                                       | 0                                       | 0          | 16                                         | 3.7177        | 0(0-Inf)                |
| ADMISSION, CANCELED--XC                                                 | 87                                      | 866.0755   | 3130                                       | 911.5042      | 0.9502(0.7675-1.1763)   |
| ADMISSION, CAST/SPLINT/IMMOBILIZER ADJUSTMENT                           | 3                                       | 24.1498    | 50                                         | 17.6239       | 1.3703(0.4253-4.4149)   |
| ADMISSION, CAST/SPLINT/IMMOBILIZER CHANGE                               | 14                                      | 103.7989   | 229                                        | 68.3351       | 1.519(0.8833-2.612)     |
| ADMISSION, CATHETER CHANGE                                              | 1                                       | 10.6048    | 48                                         | 26.1398       | 0.4057(0.0559-2.9457)   |
| ADMISSION, DIABETES UNIT                                                | 0                                       | 0          | 6                                          | 1.4658        | 0(0-Inf)                |
| ADMISSION, DIAGNOSIS NOT GIVEN --NODX                                   | 467                                     | 6218.193   | 13358                                      | 8698.3342     | 0.7149(0.6517-0.7842)   |
| ADMISSION, DRESSING CHANGE                                              | 3                                       | 22.3099    | 47                                         | 14.4026       | 1.549(0.4796-5.0028)    |
| ADMISSION, FMC PATIENT (FILMS/TESTS; PT. NOT SEEN)                      | 0                                       | 0          | 2                                          | 0.432         | 0(0-Inf)                |
| ADMISSION, HIBBING                                                      | 0                                       | 0          | 1                                          | 0.234         | 0(0-Inf)                |
| ADMISSION, LOST HISTORY (WILL CODE WHEN HISTORY FOUND)                  | 0                                       | 0          | 1                                          | 0.2354        | 0(0-Inf)                |
| ADMISSION, MPPTC (ST.MARY'S PSYCHIATRIC & PSYCHOLOGIC TREATMENT CENTER) | 19                                      | 165.4048   | 435                                        | 175.1741      | 0.9442(0.5957-1.4967)   |
| ADMISSION, NEC (HOSPITAL)                                               | 0                                       | 0          | 2                                          | 1.8979        | 0(0-Inf)                |
| ADMISSION, OUTSIDE FACILITY, NEC--ADOF                                  | 17                                      | 119.9042   | 666                                        | 180.7773      | 0.6633(0.4094-1.0744)   |
| ADMISSION, PATIENT NOT SEEN (NO OTHER CODES FOR THIS DATE)              | 65                                      | 516.6404   | 1619                                       | 535.3323      | 0.9651(0.7527-1.2375)   |
| ADMISSION, PATIENT NOT SEEN, NEC (THIS # MAY BE USED WITH OTHER CODES)  |                                         |            |                                            |               |                         |
|                                                                         | 47                                      | 385.0421   | 834                                        | 296.4114      | 1.299(0.9673-1.7445)    |
| ADMISSION, PRESCRIPTION ONLY                                            | 36                                      | 284.9642   | 1162                                       | 394.8527      | 0.7217(0.5176-1.0063)   |
| ADMISSION, REGISTERED RELATIVE--ADRR                                    | 4                                       | 62.2003    | 231                                        | 85.483        | 0.7276(0.2705-1.9575)   |
| ADMISSION, REREGISTERED BY ERROR--XER                                   | 17                                      | 131.5492   | 248                                        | 59.206        | 2.2219(1.3557-3.6414)   |
| ADMISSION, WINONA                                                       | 2                                       | 16.2977    | 16                                         | 3.7947        | 4.2949(0.9744-18.9316)  |

| Description                             | No. of Positive Cases with Disease Code | Case Rate* | No. of Positive Controls with Disease Code | Control Rate* | Relative Risk (95%CI)    |
|-----------------------------------------|-----------------------------------------|------------|--------------------------------------------|---------------|--------------------------|
| ADYNAMIC BOWEL                          | 6                                       | 64.4688    | 24                                         | 13.5141       | 4.7705(1.933-11.773)     |
| AERO-OTITIS MEDIA                       | 1                                       | 9.4683     | 25                                         | 6.585         | 1.4379(0.1936-10.6783)   |
| AEROPHAGIA                              | 2                                       | 14.9147    | 103                                        | 24.3414       | 0.6127(0.1508-2.489)     |
| AFFERENT PUPIL DEFECT                   | 0                                       | 0          | 1                                          | 0.4049        | 0(0-Inf)                 |
| AFTER-CATARACT, NEC                     | 0                                       | 0          | 10                                         | 7.177         | 0(0-Inf)                 |
| AGENESIS, KIDNEY                        | 0                                       | 0          | 1                                          | 0.3527        | 0(0-Inf)                 |
| AGENESIS, OVARY                         | 0                                       | 0          | 1                                          | 0.8274        | 0(0-Inf)                 |
| AGENESIS, OVIDUCT                       | 0                                       | 0          | 1                                          | 0.8275        | 0(0-Inf)                 |
| AGENESIS, RENAL                         | 0                                       | 0          | 1                                          | 0.3527        | 0(0-Inf)                 |
| AGEUSIA                                 | 0                                       | 0          | 3                                          | 0.7175        | 0(0-Inf)                 |
| AGING, FACIAL SKIN                      | 1                                       | 6.9001     | 45                                         | 10.8954       | 0.6333(0.0869-4.6141)    |
| AGING, LARYNX                           | 1                                       | 9.2529     | 3                                          | 1.3448        | 6.8804(0.6941-68.2075)   |
| AGITATION                               | 22                                      | 349.967    | 356                                        | 352.9576      | 0.9915(0.644-1.5266)     |
| AGNOSIA, NOS (VISUAL/SPEECH)            | 0                                       | 0          | 2                                          | 1.0782        | 0(0-Inf)                 |
| AGORAPHOBIA                             | 2                                       | 14.7846    | 44                                         | 13.2619       | 1.1148(0.2689-4.6214)    |
| AGRANULOCYTOSIS                         | 0                                       | 0          | 2                                          | 1.7767        | 0(0-Inf)                 |
| AGRAPHIA, NOS                           | 0                                       | 0          | 4                                          | 1.1419        | 0(0-Inf)                 |
| AIDS, NOS--AIDS                         | 0                                       | 0          | 2                                          | 0.5457        | 0(0-Inf)                 |
| AIR HUNGER                              | 0                                       | 0          | 6                                          | 3.1478        | 0(0-Inf)                 |
| AKATHISIA                               | 0                                       | 0          | 14                                         | 5.6987        | 0(0-Inf)                 |
| AKINETIC, HEART, NEC                    | 0                                       | 0          | 3                                          | 0.8873        | 0(0-Inf)                 |
| AKINETIC, VENTRICLE, LEFT               | 0                                       | 0          | 2                                          | 0.631         | 0(0-Inf)                 |
| ALBINISM                                | 1                                       | 14.9041    | 1                                          | 0.3476        | 42.8764(2.5566-719.0767) |
| ALBUMINURIA, NOS                        | 6                                       | 51.991     | 109                                        | 44.1847       | 1.1767(0.516-2.6834)     |
| ALCOHOL USE                             | 6                                       | 52.6237    | 124                                        | 51.4857       | 1.0221(0.4495-2.3239)    |
| ALCOHOLIC, ADDICTION--ALCO (ALCOHOLISM) | 29                                      | 226.4273   | 623                                        | 161.6174      | 1.401(0.9644-2.0353)     |
| ALCOHOLIC, CHRONIC                      | 3                                       | 20.8995    | 66                                         | 17.9517       | 1.1642(0.3648-3.7154)    |
| ALCOHOLIC, DETERIORATION                | 0                                       | 0          | 1                                          | 0.3526        | 0(0-Inf)                 |
| ALCOHOLIC, EPISODIC, EXCESSIVE DRINKING | 0                                       | 0          | 2                                          | 0.631         | 0(0-Inf)                 |
| ALCOHOLIC, HABITUAL, EXCESSIVE DRINKING | 0                                       | 0          | 1                                          | 0.4751        | 0(0-Inf)                 |
| ALCOHOLIC, HALLUCINOSES, NOS            | 0                                       | 0          | 1                                          | 0.234         | 0(0-Inf)                 |
| ALCOHOLIC, INTOXICATION, ACUTE          | 4                                       | 28.3953    | 130                                        | 36.8291       | 0.771(0.2845-2.0896)     |
| ALCOHOLIC, NOS                          | 2                                       | 20.0205    | 14                                         | 3.903         | 5.1295(1.1511-22.8585)   |
| ALCOHOLIC, TREATMENT UNIT               | 0                                       | 0          | 7                                          | 1.9956        | 0(0-Inf)                 |
| ALCOHOLISM IN REMISSION                 | 8                                       | 58.472     | 156                                        | 47.242        | 1.2377(0.6068-2.5245)    |
| ALDOSTERONISM, NOS                      | 0                                       | 0          | 6                                          | 2.0358        | 0(0-Inf)                 |
| ALDOSTERONISM, PRIMARY                  | 0                                       | 0          | 18                                         | 5.0476        | 0(0-Inf)                 |
| ALDOSTERONOMA                           | 0                                       | 0          | 1                                          | 0.2729        | 0(0-Inf)                 |
| ALEXIA                                  | 1                                       | 13.4748    | 1                                          | 0.7527        | 17.902(1.0898-294.086)   |
| ALKALOSIS, METABOLIC                    | 1                                       | 10.5194    | 19                                         | 10.23         | 1.0283(0.1369-7.7237)    |

| Description                                                 | No. of Positive Cases with Disease Code | Case Rate* | No. of Positive Controls with Disease Code | Control Rate* | Relative Risk (95%CI)  |
|-------------------------------------------------------------|-----------------------------------------|------------|--------------------------------------------|---------------|------------------------|
| ALKALOSIS, RESPIRATORY                                      | 0                                       | 0          | 3                                          | 1.5412        | 0(0-Inf)               |
| ALLERGY, ADHESIVE TAPE                                      | 3                                       | 21.1444    | 111                                        | 25.6702       | 0.8237(0.2609-2.6003)  |
| ALLERGY, BEE STING                                          | 4                                       | 29.2129    | 155                                        | 37.598        | 0.777(0.2874-2.1007)   |
| ALLERGY, CHEMICAL, CONTACT WITH SKIN                        | 0                                       | 0          | 20                                         | 4.4427        | 0(0-Inf)               |
| ALLERGY, CONTACT                                            | 0                                       | 0          | 31                                         | 8.0086        | 0(0-Inf)               |
| ALLERGY, COSMETICS                                          | 1                                       | 20.045     | 10                                         | 4.7588        | 4.2122(0.531-33.4148)  |
| ALLERGY, DETERGENTS                                         | 1                                       | 7.077      | 9                                          | 2.0649        | 3.4273(0.4262-27.557)  |
| ALLERGY, DRUG, NOS, SEE ALSO EFFECT, ADVERSE, DRUG          | 2                                       | 13.9561    | 13                                         | 3.087         | 4.5209(1.0036-20.3651) |
| ALLERGY, FOODSTUFF                                          | 2                                       | 14.2982    | 91                                         | 21.3419       | 0.67(0.1646-2.727)     |
| ALLERGY, HAIR DYE                                           | 0                                       | 0          | 3                                          | 0.7021        | 0(0-Inf)               |
| ALLERGY, HEAT (SKIN CONDITION)                              | 0                                       | 0          | 2                                          | 0.4854        | 0(0-Inf)               |
| ALLERGY, INSECT BITE, CODE ALSO INJURY, SUPERFICIAL BY SITE | 3                                       | 22.9075    | 87                                         | 20.5365       | 1.1155(0.3517-3.538)   |
| ALLERGY, LATEX (GLOVE)                                      | 0                                       | 0          | 24                                         | 6.5919        | 0(0-Inf)               |
| ALLERGY, MEDICINE, TOPICAL                                  | 0                                       | 0          | 13                                         | 2.9985        | 0(0-Inf)               |
| ALLERGY, METALS                                             | 1                                       | 8.1367     | 68                                         | 15.5023       | 0.5249(0.0727-3.7907)  |
| ALLERGY, MILK                                               | 0                                       | 0          | 4                                          | 1.1825        | 0(0-Inf)               |
| ALLERGY, NASAL (FEATHERS, DUST, ANIMAL DANDER, ETC)         | 1                                       | 7.6814     | 163                                        | 38.7998       | 0.198(0.0277-1.4152)   |
| ALLERGY, NEC                                                | 1                                       | 7.2864     | 42                                         | 9.5362        | 0.7641(0.1047-5.5762)  |
| ALLERGY, NOS                                                | 9                                       | 62.7645    | 233                                        | 59.1975       | 1.0603(0.5436-2.0679)  |
| ALLERGY, OPHTHALMIC, NEC/NOS                                | 0                                       | 0          | 13                                         | 4.094         | 0(0-Inf)               |
| ALLERGY, PARABEN                                            | 0                                       | 0          | 1                                          | 0.3526        | 0(0-Inf)               |
| ALLERGY, PERFUMES/DEODORANTS, CONTACT WITH SKIN             | 0                                       | 0          | 3                                          | 0.7063        | 0(0-Inf)               |
| ALLERGY, PLANT LEAVES                                       | 0                                       | 0          | 5                                          | 1.248         | 0(0-Inf)               |
| ALLERGY, POISON OAK                                         | 0                                       | 0          | 1                                          | 0.2729        | 0(0-Inf)               |
| ALLERGY, RHUS                                               | 1                                       | 8.7296     | 5                                          | 1.3249        | 6.5887(0.7526-57.6828) |
| ALLERGY, SEASONAL (POLLEN, RAGWEED)                         | 11                                      | 76.7977    | 304                                        | 74.517        | 1.0306(0.5637-1.8844)  |
| ALLERGY, SINUS                                              | 0                                       | 0          | 1                                          | 0.4048        | 0(0-Inf)               |
| ALLERGY, SUTURE MATERIAL                                    | 1                                       | 8.6039     | 15                                         | 5.956         | 1.4446(0.1891-11.0331) |
| ALOPECIA, AREATA                                            | 1                                       | 7.6227     | 83                                         | 19.2511       | 0.396(0.055-2.8496)    |
| ALOPECIA, AREATA, TOTALIS                                   | 0                                       | 0          | 6                                          | 1.7129        | 0(0-Inf)               |
| ALOPECIA, CICATRISATA                                       | 0                                       | 0          | 4                                          | 1.0274        | 0(0-Inf)               |
| ALOPECIA, NOS                                               | 5                                       | 34.7247    | 259                                        | 63.8773       | 0.5436(0.224-1.3192)   |
| ALOPECIA, SCARRING                                          | 1                                       | 7.7004     | 7                                          | 2.2824        | 3.3739(0.4072-27.953)  |
| ALOPECIA, UNIVERSALIS                                       | 0                                       | 0          | 3                                          | 1.1479        | 0(0-Inf)               |
| ALPHA INTRUSION SLEEP DISORDER                              | 0                                       | 0          | 1                                          | 0.3526        | 0(0-Inf)               |
| ALPHA-1-ANTITRYPSIN PHENOTYPE MZ                            | 0                                       | 0          | 3                                          | 0.8709        | 0(0-Inf)               |
| ALPHA-DELTA SLEEP                                           | 0                                       | 0          | 6                                          | 1.3836        | 0(0-Inf)               |
| ALTERNARIA                                                  | 0                                       | 0          | 1                                          | 0.234         | 0(0-Inf)               |
| ALVEOLITIS (ALLERGIC)                                       | 0                                       | 0          | 5                                          | 1.1789        | 0(0-Inf)               |

| Description                                            | No. of Positive Cases with Disease Code | Case Rate* | No. of Positive Controls with Disease Code | Control Rate* | Relative Risk (95%CI)  |
|--------------------------------------------------------|-----------------------------------------|------------|--------------------------------------------|---------------|------------------------|
| AMAUROSIS, FUGAX                                       | 5                                       | 41.6135    | 187                                        | 70.4966       | 0.5903(0.2425-1.4371)  |
| AMAUROSIS, NOS                                         | 1                                       | 7.2797     | 22                                         | 6.4755        | 1.1242(0.1505-8.3964)  |
| AMBLYOPIA, CONGENITAL                                  | 0                                       | 0          | 1                                          | 0.234         | 0(0-Inf)               |
| AMBLYOPIA, NOS                                         | 8                                       | 55.8452    | 287                                        | 71.2108       | 0.7842(0.3878-1.5859)  |
| AMBLYOPIA, REFRACTION                                  | 1                                       | 17.0684    | 7                                          | 2.5858        | 6.6009(0.7993-54.5102) |
| AMBLYOPIA, STRABISMIC                                  | 0                                       | 0          | 1                                          | 0.2354        | 0(0-Inf)               |
| AMBLYOPIA, TOBACCO, ALCOHOL                            | 0                                       | 0          | 1                                          | 0.2729        | 0(0-Inf)               |
| AMBLYOPIA, TRAUMATIC                                   | 0                                       | 0          | 1                                          | 1.0362        | 0(0-Inf)               |
| AMBLYOPIA, WITH EX ANOPSIA                             | 0                                       | 0          | 2                                          | 0.5474        | 0(0-Inf)               |
| AMEBIASIS                                              | 0                                       | 0          | 9                                          | 2.5796        | 0(0-Inf)               |
| AMELOBLASTOMA, NOS, CODE ALSO NEOPLASM, BENIGN BY SITE | 0                                       | 0          | 2                                          | 0.7896        | 0(0-Inf)               |
| AMENORRHEA, NOS                                        | 0                                       | 0          | 30                                         | 23.9724       | 0(0-Inf)               |
| AMENORRHEA, PRIMARY (NO MENARCHE BY AGE 18)            | 0                                       | 0          | 2                                          | 1.6554        | 0(0-Inf)               |
| AMENORRHEA, PRIMARY, DUE TO OVARIAN DYSFUNCTION        | 0                                       | 0          | 1                                          | 0.398         | 0(0-Inf)               |
| AMENORRHEA, SECONDARY (NO MENSES FOR AT LEAST 3 MOS.)  | 0                                       | 0          | 15                                         | 13.1183       | 0(0-Inf)               |
| AMENORRHEA, UNDETERMINED ETIOLOGY                      | 0                                       | 0          | 3                                          | 1.9324        | 0(0-Inf)               |
| AMENTIA                                                | 0                                       | 0          | 1                                          | 0.2354        | 0(0-Inf)               |
| AMETROPIA                                              | 0                                       | 0          | 1                                          | 0.3526        | 0(0-Inf)               |
| AMNESIA, GLOBAL                                        | 0                                       | 0          | 6                                          | 2.4219        | 0(0-Inf)               |
| AMNESIA, NOS                                           | 2                                       | 16.6426    | 42                                         | 15.9499       | 1.0434(0.2516-4.3274)  |
| AMNESIA, POST-TRAUMATIC                                | 0                                       | 0          | 4                                          | 0.9671        | 0(0-Inf)               |
| AMNESIA, TRANSIENT GLOBAL                              | 5                                       | 38.6199    | 124                                        | 40.7116       | 0.9486(0.387-2.325)    |
| AMNIOCENTESIS                                          | 0                                       | 0          | 1                                          | 0.398         | 0(0-Inf)               |
| AMPUTATION, NEAR, CODE ALSO WOUND OPEN BY SITE STATED  | 0                                       | 0          | 3                                          | 1.0578        | 0(0-Inf)               |
| AMPUTATION, TRAUMATIC, ARM, LATE EFFECT                | 0                                       | 0          | 1                                          | 2.4856        | 0(0-Inf)               |
| AMPUTATION, TRAUMATIC, ARM, PARTIAL / INCOMPLETE       | 0                                       | 0          | 1                                          | 0.2729        | 0(0-Inf)               |
| AMPUTATION, TRAUMATIC, FINGER, COMPLETE                | 0                                       | 0          | 14                                         | 7.423         | 0(0-Inf)               |
| AMPUTATION, TRAUMATIC, FINGER, LATE EFFECT             | 0                                       | 0          | 4                                          | 1.0951        | 0(0-Inf)               |
| AMPUTATION, TRAUMATIC, FINGER, NOS                     | 1                                       | 8.8442     | 13                                         | 5.5122        | 1.6045(0.2084-12.3553) |
| AMPUTATION, TRAUMATIC, FINGER, PARTIAL / INCOMPLETE    | 3                                       | 21.171     | 76                                         | 19.625        | 1.0788(0.3394-3.4293)  |
| AMPUTATION, TRAUMATIC, HAND, LATE EFFECT               | 0                                       | 0          | 1                                          | 0.3527        | 0(0-Inf)               |
| AMPUTATION, TRAUMATIC, LEG, PARTIAL / INCOMPLETE       | 0                                       | 0          | 2                                          | 0.5457        | 0(0-Inf)               |
| AMPUTATION, TRAUMATIC, THUMB, COMPLETE                 | 0                                       | 0          | 2                                          | 0.5475        | 0(0-Inf)               |
| AMPUTATION, TRAUMATIC, THUMB, NOS                      | 0                                       | 0          | 2                                          | 0.7052        | 0(0-Inf)               |
| AMPUTATION, TRAUMATIC, THUMB, PARTIAL / INCOMPLETE     | 1                                       | 6.8756     | 17                                         | 4.635         | 1.4834(0.1962-11.2166) |
| AMPUTATION, TRAUMATIC, TOE, NOS                        | 0                                       | 0          | 2                                          | 1.0783        | 0(0-Inf)               |
| AMPUTATION, TRAUMATIC, TOE, PARTIAL / INCOMPLETE       | 0                                       | 0          | 4                                          | 1.1511        | 0(0-Inf)               |
| AMYLOID, MACULAR                                       | 0                                       | 0          | 3                                          | 0.7175        | 0(0-Inf)               |
| AMYLOIDOSIS, AL A TYPE (FAMILIAL)                      | 0                                       | 0          | 1                                          | 0.4048        | 0(0-Inf)               |
| AMYLOIDOSIS, CNS                                       | 0                                       | 0          | 1                                          | 0.8877        | 0(0-Inf)               |

| Description                                       | No. of Positive Cases with Disease Code | Case Rate* | No. of Positive Controls with Disease Code | Control Rate* | Relative Risk (95%CI)    |
|---------------------------------------------------|-----------------------------------------|------------|--------------------------------------------|---------------|--------------------------|
| AMYLOIDOSIS, G. I.                                | 1                                       | 7.692      | 1                                          | 0.3293        | 23.3598(1.3835-394.4316) |
| AMYLOIDOSIS, HEART                                | 3                                       | 32.6529    | 1                                          | 0.5662        | 57.674(5.8377-569.7944)  |
| AMYLOIDOSIS, LICHEN, HEAD                         | 0                                       | 0          | 1                                          | 0.853         | 0(0-Inf)                 |
| AMYLOIDOSIS, LICHEN, LOWER EXTREMITY              | 0                                       | 0          | 1                                          | 0.234         | 0(0-Inf)                 |
| AMYLOIDOSIS, MACULAR                              | 0                                       | 0          | 1                                          | 0.2354        | 0(0-Inf)                 |
| AMYLOIDOSIS, NOS                                  | 7                                       | 85.227     | 18                                         | 11.821        | 7.2098(2.9849-17.4146)   |
| AMYLOIDOSIS, NOS, TRUNK                           | 2                                       | 20.7731    | 4                                          | 2.1131        | 9.8308(1.7596-54.9252)   |
| AMYLOIDOSIS, PRIMARY (SYSTEMIC), HEAD             | 0                                       | 0          | 1                                          | 0.4048        | 0(0-Inf)                 |
| AMYLOIDOSIS, PRIMARY (SYSTEMIC), NOS              | 4                                       | 32.1976    | 2                                          | 0.7082        | 45.463(8.0655-256.2613)  |
| AMYLOIDOSIS, PRIMARY (SYSTEMIC), TRUNK            | 1                                       | 12.3508    | 1                                          | 0.7553        | 16.3531(0.9863-271.1355) |
| AMYLOIDOSIS, RENAL                                | 1                                       | 8.0718     | 2                                          | 0.7121        | 11.3359(0.9849-130.4759) |
| AMYOTROPHY SEE ALSO ATROPHY                       | 0                                       | 0          | 2                                          | 1.0785        | 0(0-Inf)                 |
| ANAEJACULATION                                    | 0                                       | 0          | 1                                          | 0.2729        | 0(0-Inf)                 |
| ANAGEN EFFLUVIUM                                  | 0                                       | 0          | 2                                          | 0.4681        | 0(0-Inf)                 |
| ANALBUMINEMIA                                     | 0                                       | 0          | 1                                          | 0.8528        | 0(0-Inf)                 |
| ANAPHYLAXIS CODE ALSO EFFECT ADVERSE IF STATED    | 0                                       | 0          | 27                                         | 6.639         | 0(0-Inf)                 |
| ANARTHRIA                                         | 1                                       | 12.8517    | 4                                          | 2.8307        | 4.5401(0.4997-41.2523)   |
| ANASARCA, CARDIAC                                 | 0                                       | 0          | 1                                          | 0.2354        | 0(0-Inf)                 |
| ANASARCA, LUNG/PULMONARY                          | 1                                       | 30.5487    | 0                                          | 0             | 14380987438.5195(0-Inf)  |
| ANASARCA, NOS                                     | 3                                       | 36.0519    | 28                                         | 18.5611       | 1.9423(0.5872-6.4244)    |
| ANASARCA, NUTRITIONAL                             | 0                                       | 0          | 1                                          | 0.8528        | 0(0-Inf)                 |
| ANASARCA, RENAL                                   | 0                                       | 0          | 1                                          | 0.4048        | 0(0-Inf)                 |
| ANEMIA, APLASTIC, NOS                             | 0                                       | 0          | 1                                          | 6.48          | 0(0-Inf)                 |
| ANEMIA, B12 DEFICIENCY                            | 1                                       | 13.3123    | 24                                         | 18.6041       | 0.7156(0.0965-5.3084)    |
| ANEMIA, BLOOD DONATION CAUSED                     | 0                                       | 0          | 30                                         | 7.8902        | 0(0-Inf)                 |
| ANEMIA, BLOOD LOSS, ACUTE                         | 0                                       | 0          | 8                                          | 6.0212        | 0(0-Inf)                 |
| ANEMIA, BLOOD LOSS, CHRONIC                       | 0                                       | 0          | 18                                         | 5.2556        | 0(0-Inf)                 |
| ANEMIA, BLOOD LOSS--ANBL                          | 16                                      | 114.6774   | 298                                        | 81.4917       | 1.4072(0.8492-2.3319)    |
| ANEMIA, COOMBS'                                   | 0                                       | 0          | 1                                          | 0.4048        | 0(0-Inf)                 |
| ANEMIA, FANCONI'S                                 | 0                                       | 0          | 1                                          | 0.8878        | 0(0-Inf)                 |
| ANEMIA, FOLATE DEFICIENCY                         | 0                                       | 0          | 4                                          | 2.4138        | 0(0-Inf)                 |
| ANEMIA, HEMOLYTIC, ACQUIRED, (ACUTE)              | 1                                       | 8.7106     | 4                                          | 0.9402        | 9.2642(1.0018-85.6715)   |
| ANEMIA, HEMOLYTIC, AUTO-IMMUNE                    | 3                                       | 22.9281    | 14                                         | 4.5606        | 5.0275(1.4253-17.7329)   |
| ANEMIA, HEMOLYTIC, COLD AGGLUTININ                | 1                                       | 8.0789     | 2                                          | 0.7122        | 11.3442(0.9857-130.563)  |
| ANEMIA, HEMOLYTIC, COOMBS' POSITIVE               | 0                                       | 0          | 4                                          | 2.3009        | 0(0-Inf)                 |
| ANEMIA, HEMOLYTIC, DRUG-INDUCED                   | 0                                       | 0          | 1                                          | 0.4049        | 0(0-Inf)                 |
| ANEMIA, HEMOLYTIC, DUE TO INTERNAL PROSTHETIC DEV | 0                                       | 0          | 1                                          | 0.4048        | 0(0-Inf)                 |
| ANEMIA, HEMOLYTIC, NOS                            | 3                                       | 29.7379    | 16                                         | 7.8889        | 3.7696(1.0879-13.0617)   |
| ANEMIA, HYPERCHROMIC                              | 0                                       | 0          | 1                                          | 0.2354        | 0(0-Inf)                 |
| ANEMIA, HYPOCHROMIC                               | 1                                       | 7.4355     | 28                                         | 6.247         | 1.1902(0.1609-8.8031)    |

| Description                                                                | No. of Positive Cases with Disease Code | Case Rate* | No. of Positive Controls with Disease Code | Control Rate* | Relative Risk (95%CI)    |
|----------------------------------------------------------------------------|-----------------------------------------|------------|--------------------------------------------|---------------|--------------------------|
| ANEMIA, HYPOCHROMIC, SECONDARY TO BLEEDING                                 | 0                                       | 0          | 1                                          | 0.8277        | 0(0-Inf)                 |
| ANEMIA, IDIOPATHIC                                                         | 1                                       | 7.0512     | 11                                         | 2.9755        | 2.3697(0.3019-18.5985)   |
| ANEMIA, IRON DEFICIENCY, NOS--ANID                                         | 51                                      | 383.0343   | 1275                                       | 377.0723      | 1.0158(0.7671-1.3451)    |
| ANEMIA, IRON DEFICIENCY, NUTRITIONAL                                       | 1                                       | 7.2114     | 2                                          | 0.4643        | 15.5332(1.3401-180.0476) |
| ANEMIA, IRON DEFICIENCY, SECONDARY TO BLEEDING                             | 3                                       | 30.51      | 140                                        | 35.3773       | 0.8624(0.2742-2.7122)    |
| ANEMIA, MACROCYTIC                                                         | 11                                      | 158.8874   | 161                                        | 132.557       | 1.1986(0.6498-2.2111)    |
| ANEMIA, MEGALOBlastic                                                      | 1                                       | 14.2183    | 14                                         | 11.4184       | 1.2452(0.1629-9.5201)    |
| ANEMIA, MICROCYTIC, NOS                                                    | 5                                       | 47.7812    | 213                                        | 100.2199      | 0.4768(0.1962-1.1588)    |
| ANEMIA, NORMOCHROMIC                                                       | 9                                       | 88.5007    | 114                                        | 54.8939       | 1.6122(0.8155-3.1872)    |
| ANEMIA, NOS, WITH CHRONIC DISEASE, NEC                                     | 25                                      | 300.8677   | 326                                        | 213.2537      | 1.4108(0.938-2.1221)     |
| ANEMIA, NOS, WITH CHRONIC INFLAMMATORY DISORDER                            | 0                                       | 0          | 5                                          | 1.9399        | 0(0-Inf)                 |
| ANEMIA, NOS, WITH CHRONIC RENAL DISEASE (CODE ALSO RENAL CONDITION STATED) | 11                                      | 128.5267   | 146                                        | 90.463        | 1.4208(0.7683-2.6274)    |
| ANEMIA, NOS, WITH MYXEDEMA                                                 | 0                                       | 0          | 1                                          | 0.398         | 0(0-Inf)                 |
| ANEMIA, NOS--AN                                                            | 182                                     | 2262.945   | 3267                                       | 2007.4658     | 1.1273(0.9706-1.3092)    |
| ANEMIA, NUTRITIONAL                                                        | 0                                       | 0          | 2                                          | 1.1381        | 0(0-Inf)                 |
| ANEMIA, PERNICIOUS C COMBINED DEGENERATION                                 | 0                                       | 0          | 2                                          | 0.432         | 0(0-Inf)                 |
| ANEMIA, PERNICIOUS, NOS                                                    | 8                                       | 84.6419    | 147                                        | 80.1368       | 1.0562(0.5173-2.1564)    |
| ANEMIA, REFRACTORY                                                         | 3                                       | 35.2027    | 23                                         | 14.4104       | 2.4429(0.7289-8.1869)    |
| ANEMIA, REFRACTORY WITH EXCESS BLASTS                                      | 0                                       | 0          | 4                                          | 7.8999        | 0(0-Inf)                 |
| ANEMIA, REFRACTORY WITH RINGED SIDEROBLAST                                 | 1                                       | 13.1916    | 8                                          | 5.9195        | 2.2285(0.2761-17.9896)   |
| ANEMIA, SECONDARY                                                          | 20                                      | 171.8058   | 236                                        | 92.1059       | 1.8653(1.179-2.9512)     |
| ANEMIA, SIDEROBLASTIC                                                      | 1                                       | 7.2359     | 2                                          | 0.575         | 12.585(1.0892-145.4175)  |
| ANEMIA, SIDEROPENIC, NOS                                                   | 0                                       | 0          | 1                                          | 0.234         | 0(0-Inf)                 |
| ANERGY (SEE ALSO ANERGASIA)                                                | 0                                       | 0          | 3                                          | 3.9234        | 0(0-Inf)                 |
| ANESTHESIA, CORNEA                                                         | 1                                       | 6.9386     | 7                                          | 1.7589        | 3.9449(0.4755-32.7249)   |
| ANESTHESIA, DOLOROSA                                                       | 0                                       | 0          | 1                                          | 0.4048        | 0(0-Inf)                 |
| ANESTHESIA, EYE                                                            | 0                                       | 0          | 1                                          | 0.4751        | 0(0-Inf)                 |
| ANESTHESIA, NOS                                                            | 1                                       | 7.0787     | 14                                         | 3.9522        | 1.7911(0.2333-13.7496)   |
| ANETODERMA                                                                 | 0                                       | 0          | 4                                          | 0.9157        | 0(0-Inf)                 |
| ANEURYSM, RUPTURED CODE ALSO ANEURYSM BY SITE                              | 0                                       | 0          | 7                                          | 2.1817        | 0(0-Inf)                 |
| ANEURYSM, ABDOMINAL, ARTERY, NOS                                           | 0                                       | 0          | 13                                         | 14.0958       | 0(0-Inf)                 |
| ANEURYSM, ANASTOMOTIC, CODE ALSO BY SITE                                   | 0                                       | 0          | 10                                         | 4.8596        | 0(0-Inf)                 |
| ANEURYSM, AORTA ABDOMINAL, NOS --AAA                                       | 32                                      | 397.7727   | 583                                        | 381.791       | 1.0419(0.7293-1.4883)    |
| ANEURYSM, AORTA, ABDOMINAL, DISSECTING                                     | 0                                       | 0          | 5                                          | 1.9393        | 0(0-Inf)                 |
| ANEURYSM, AORTA, ABDOMINAL, LEAKING                                        | 0                                       | 0          | 3                                          | 3.9222        | 0(0-Inf)                 |
| ANEURYSM, AORTA, ABDOMINAL, RUPTURED                                       | 2                                       | 29.6323    | 30                                         | 25.5447       | 1.16(0.2763-4.8693)      |
| ANEURYSM, AORTA, NEC, DISSECTING                                           | 2                                       | 22.7691    | 18                                         | 10.812        | 2.1059(0.4853-9.1389)    |
| ANEURYSM, AORTA, NOS                                                       | 7                                       | 92.7084    | 125                                        | 92.2135       | 1.0054(0.4688-2.1562)    |

| Description                                                | No. of Positive Cases with Disease Code | Case Rate* | No. of Positive Controls with Disease Code | Control Rate* | Relative Risk (95%CI)  |
|------------------------------------------------------------|-----------------------------------------|------------|--------------------------------------------|---------------|------------------------|
| ANEURYSM, AORTA, NOS, LEAKING, SEE ALSO ANEURYSM, RUPTURED | 0                                       | 0          | 1                                          | 0.8528        | 0(0-Inf)               |
| ANEURYSM, AORTA, NOS, RUPTURED                             | 0                                       | 0          | 1                                          | 0.3526        | 0(0-Inf)               |
| ANEURYSM, AORTA, THORACIC, ASCENDING, DISSECTING           | 1                                       | 7.7452     | 12                                         | 3.9768        | 1.9476(0.2504-15.1497) |
| ANEURYSM, AORTA, THORACIC, ASCENDING, NOS                  | 2                                       | 21.3823    | 60                                         | 33.0674       | 0.6466(0.1577-2.6517)  |
| ANEURYSM, AORTA, THORACIC, ASCENDING, RUPTURED             | 0                                       | 0          | 1                                          | 0.3526        | 0(0-Inf)               |
| ANEURYSM, AORTA, THORACIC, DESCENDING, DISSECTING          | 0                                       | 0          | 7                                          | 3.1042        | 0(0-Inf)               |
| ANEURYSM, AORTA, THORACIC, DESCENDING, NOS                 | 1                                       | 10.1657    | 17                                         | 8.6811        | 1.171(0.1549-8.8548)   |
| ANEURYSM, AORTA, THORACIC, DESCENDING, RUPTURED            | 0                                       | 0          | 3                                          | 2.0942        | 0(0-Inf)               |
| ANEURYSM, AORTA, THORACIC, NOS                             | 4                                       | 50.9583    | 74                                         | 52.0384       | 0.9792(0.3572-2.6842)  |
| ANEURYSM, AORTA, THORACIC, NOS, DISSECTING                 | 1                                       | 13.2657    | 5                                          | 3.6821        | 3.6028(0.4157-31.2279) |
| ANEURYSM, AORTA, THORACIC, NOS, RUPTURED                   | 0                                       | 0          | 4                                          | 4.825         | 0(0-Inf)               |
| ANEURYSM, AORTIC ARCH                                      | 1                                       | 15.0802    | 8                                          | 7.3019        | 2.0652(0.2562-16.6494) |
| ANEURYSM, ATRIUM, CONGENITAL (FOSSA OVALIS)                | 0                                       | 0          | 1                                          | 0.8879        | 0(0-Inf)               |
| ANEURYSM, ATRIUM, NOS                                      | 0                                       | 0          | 3                                          | 0.7064        | 0(0-Inf)               |
| ANEURYSM, BASILAR ARTERY, NOS                              | 0                                       | 0          | 5                                          | 1.3505        | 0(0-Inf)               |
| ANEURYSM, BRAIN, NOS                                       | 0                                       | 0          | 10                                         | 3.2841        | 0(0-Inf)               |
| ANEURYSM, CARDIAC                                          | 1                                       | 8.9508     | 5                                          | 2.1149        | 4.2323(0.4847-36.9592) |
| ANEURYSM, CAROTID ARTERY, NOS                              | 2                                       | 14.2993    | 32                                         | 8.8922        | 1.6081(0.3827-6.7572)  |
| ANEURYSM, CELIAC ARTERY, NOS                               | 0                                       | 0          | 3                                          | 0.7461        | 0(0-Inf)               |
| ANEURYSM, CEREBRAL ARTERY, NOS                             | 3                                       | 20.882     | 54                                         | 13.4413       | 1.5536(0.4831-4.9956)  |
| ANEURYSM, CEREBRAL, RUPTURED, NOS                          | 0                                       | 0          | 2                                          | 0.5708        | 0(0-Inf)               |
| ANEURYSM, COMMUNICATING CEREBRAL ARTERY                    | 0                                       | 0          | 18                                         | 6.7557        | 0(0-Inf)               |
| ANEURYSM, CORONARY ARTERY, NOS                             | 0                                       | 0          | 13                                         | 6.4677        | 0(0-Inf)               |
| ANEURYSM, DISSECTING, NOS, CODE ALSO ANEURYSM BY SITE      | 0                                       | 0          | 33                                         | 11.285        | 0(0-Inf)               |
| ANEURYSM, ECTATIC, CODE ALSO BY SITE                       | 0                                       | 0          | 1                                          | 0.4048        | 0(0-Inf)               |
| ANEURYSM, EXTREMITY, LOWER, ARTERY, NOS                    | 0                                       | 0          | 2                                          | 0.4708        | 0(0-Inf)               |
| ANEURYSM, EXTREMITY, UPPER, ARTERY, NEC                    | 0                                       | 0          | 1                                          | 0.234         | 0(0-Inf)               |
| ANEURYSM, EXTREMITY, UPPER, ARTERY, NOS                    | 0                                       | 0          | 3                                          | 0.8018        | 0(0-Inf)               |
| ANEURYSM, FALSE, CODE ALSO BY SITE                         | 3                                       | 27.3025    | 56                                         | 24.2345       | 1.1266(0.3514-3.6123)  |
| ANEURYSM, FEMORAL ARTERY, COMMON, NOS                      | 0                                       | 0          | 20                                         | 12.7695       | 0(0-Inf)               |
| ANEURYSM, FEMORAL ARTERY, NOS                              | 2                                       | 22.2699    | 40                                         | 23.2476       | 0.9579(0.2307-3.977)   |
| ANEURYSM, FEMORAL ARTERY, SUPERFICIAL, NOS                 | 0                                       | 0          | 1                                          | 0.3526        | 0(0-Inf)               |
| ANEURYSM, FUSIFORM, CODE ALSO BY SITE                      | 0                                       | 0          | 3                                          | 1.1479        | 0(0-Inf)               |
| ANEURYSM, GRAFT, ANY, CODE ALSO BY SITE                    | 0                                       | 0          | 6                                          | 3.0216        | 0(0-Inf)               |
| ANEURYSM, HEAD, ARTERY, NEC                                | 0                                       | 0          | 2                                          | 0.5709        | 0(0-Inf)               |
| ANEURYSM, HEPATIC ARTERY, NOS                              | 1                                       | 6.8955     | 3                                          | 0.731         | 9.4333(0.9392-94.7442) |
| ANEURYSM, HYPOGASTRIC ARTERY, NOS                          | 1                                       | 12.4627    | 4                                          | 2.7098        | 4.5991(0.507-41.7223)  |
| ANEURYSM, ILIAC ARTERY, NOS                                | 4                                       | 42.5413    | 101                                        | 55.3898       | 0.768(0.2823-2.0896)   |

| Description                                                  | No. of Positive Cases with Disease Code | Case Rate* | No. of Positive Controls with Disease Code | Control Rate* | Relative Risk (95%CI)    |
|--------------------------------------------------------------|-----------------------------------------|------------|--------------------------------------------|---------------|--------------------------|
| ANEURYSM, INFECTED, CODE ALSO BY SITE AND ORGANISM IF STATED | 0                                       | 0          | 2                                          | 1.0783        | 0(0-Inf)                 |
| ANEURYSM, INFLAMMATORY (CODE ALSO BY SITE)                   | 0                                       | 0          | 7                                          | 2.7301        | 0(0-Inf)                 |
| ANEURYSM, INNOMINATE ARTERY, NOS                             | 0                                       | 0          | 1                                          | 0.4049        | 0(0-Inf)                 |
| ANEURYSM, INTRACRANIAL ARTERY, NOS                           | 0                                       | 0          | 16                                         | 4.716         | 0(0-Inf)                 |
| ANEURYSM, MACULAR                                            | 0                                       | 0          | 4                                          | 1.9297        | 0(0-Inf)                 |
| ANEURYSM, MESENTERIC ARTERY, NOS                             | 0                                       | 0          | 2                                          | 0.6309        | 0(0-Inf)                 |
| ANEURYSM, MYOCARDIAL                                         | 0                                       | 0          | 5                                          | 1.6797        | 0(0-Inf)                 |
| ANEURYSM, NOS                                                | 1                                       | 12.1292    | 24                                         | 15.6377       | 0.7756(0.1046-5.7533)    |
| ANEURYSM, OCCLUDED, CODE ALSO BY SITE                        | 0                                       | 0          | 2                                          | 0.5458        | 0(0-Inf)                 |
| ANEURYSM, OPHTHALMIC ARTERY, NOS                             | 0                                       | 0          | 9                                          | 3.3016        | 0(0-Inf)                 |
| ANEURYSM, PLANTAR ARTERY, NOS                                | 0                                       | 0          | 1                                          | 0.8882        | 0(0-Inf)                 |
| ANEURYSM, POPLITEAL ARTERY                                   | 2                                       | 42.2676    | 26                                         | 28.4087       | 1.4878(0.3517-6.2945)    |
| ANEURYSM, RADIAL ARTERY, NOS                                 | 1                                       | 14.0205    | 1                                          | 0.8073        | 17.3677(1.0509-287.0213) |
| ANEURYSM, RADIAL ARTERY, TRAUMATIC                           | 0                                       | 0          | 1                                          | 0.8537        | 0(0-Inf)                 |
| ANEURYSM, RENAL ARTERY, DISSECTING                           | 0                                       | 0          | 3                                          | 1.511         | 0(0-Inf)                 |
| ANEURYSM, RENAL ARTERY, NOS                                  | 2                                       | 20.5561    | 13                                         | 6.7573        | 3.0421(0.6796-13.6177)   |
| ANEURYSM, RETINAL ARTERY                                     | 1                                       | 10.6554    | 8                                          | 4.4343        | 2.4029(0.2968-19.4533)   |
| ANEURYSM, SACULAR, CODE ALSO BY SITE                         | 0                                       | 0          | 9                                          | 2.0877        | 0(0-Inf)                 |
| ANEURYSM, SINUS OF VALSALVA, CONGENITAL, NOS                 | 0                                       | 0          | 2                                          | 1.8977        | 0(0-Inf)                 |
| ANEURYSM, SPLENIC ARTERY                                     | 0                                       | 0          | 20                                         | 5.3133        | 0(0-Inf)                 |
| ANEURYSM, SUBCLAVIAN ARTERY                                  | 0                                       | 0          | 3                                          | 0.746         | 0(0-Inf)                 |
| ANEURYSM, THROMBOSED, CODE ALSO BY SITE                      | 1                                       | 13.905     | 8                                          | 6.2762        | 2.2155(0.2749-17.8566)   |
| ANEURYSM, TRUE, CODE ALSO ANEURYSM, BY SITE                  | 0                                       | 0          | 1                                          | 0.3526        | 0(0-Inf)                 |
| ANEURYSM, TRUNK, ARTERY, NEC                                 | 0                                       | 0          | 4                                          | 2.3947        | 0(0-Inf)                 |
| ANEURYSM, TRUNK, ARTERY, NOS                                 | 0                                       | 0          | 5                                          | 2.3433        | 0(0-Inf)                 |
| ANEURYSM, TRUNK, LATE EFFECT OR OLD                          | 0                                       | 0          | 1                                          | 0.3526        | 0(0-Inf)                 |
| ANEURYSM, ULNAR ARTERY, NOS                                  | 0                                       | 0          | 1                                          | 0.3526        | 0(0-Inf)                 |
| ANEURYSM, VEIN, NEC/NOS, SEE ALSO ANOMALY/DEFORMITY          | 0                                       | 0          | 2                                          | 0.5069        | 0(0-Inf)                 |
| ANEURYSM, VENOUS (SEE ALSO VARIX)                            | 0                                       | 0          | 2                                          | 0.4853        | 0(0-Inf)                 |
| ANEURYSM, VENTRICULAR SEPTAL                                 | 0                                       | 0          | 1                                          | 0.2354        | 0(0-Inf)                 |
| ANEURYSM, VENTRICULAR, LEFT (NON CONGENITAL)                 | 0                                       | 0          | 29                                         | 11.5751       | 0(0-Inf)                 |
| ANEURYSM, VENTRICULAR, NOS (NON-CONGENITAL)                  | 1                                       | 9.6219     | 5                                          | 2.367         | 4.0651(0.4667-35.4079)   |
| ANEURYSM, VERTEBRAL ARTERY, NOS                              | 0                                       | 0          | 10                                         | 3.298         | 0(0-Inf)                 |
| ANGIITIS, NECROTIZING                                        | 0                                       | 0          | 1                                          | 0.3526        | 0(0-Inf)                 |
| ANGIITIS, NOS                                                | 0                                       | 0          | 2                                          | 1.1973        | 0(0-Inf)                 |
| ANGINA, ABDOMINAL                                            | 0                                       | 0          | 3                                          | 1.977         | 0(0-Inf)                 |
| ANGINA, CARDIAC                                              | 0                                       | 0          | 1                                          | 0.8532        | 0(0-Inf)                 |
| ANGINA, DECUBITUS                                            | 0                                       | 0          | 1                                          | 0.2729        | 0(0-Inf)                 |
| ANGINA, INTESTINAL (5-1-81)                                  | 0                                       | 0          | 2                                          | 0.8096        | 0(0-Inf)                 |



| Description                                                            | No. of Positive Cases with Disease Code | Case Rate* | No. of Positive Controls with Disease Code | Control Rate* | Relative Risk (95%CI)  |
|------------------------------------------------------------------------|-----------------------------------------|------------|--------------------------------------------|---------------|------------------------|
| ANGINA, NOS --ANG                                                      | 87                                      | 859.7608   | 2075                                       | 964.4137      | 0.8915(0.719-1.1054)   |
| ANGINA, ON EXERTION                                                    | 3                                       | 31.2755    | 99                                         | 52.588        | 0.5947(0.1883-1.8787)  |
| ANGINA, PECTORIS --ANGP                                                | 64                                      | 554.5297   | 1237                                       | 451.0783      | 1.2293(0.9555-1.5817)  |
| ANGINA, PECTORIS, ATYPICAL                                             | 0                                       | 0          | 3                                          | 1.9035        | 0(0-Inf)               |
| ANGINA, PRINZMETAL                                                     | 0                                       | 0          | 5                                          | 1.734         | 0(0-Inf)               |
| ANGINA, PROGRESSIVE                                                    | 1                                       | 8.9396     | 44                                         | 18.6826       | 0.4785(0.0658-3.4822)  |
| ANGIOBLASTOMA CODE ALSO NEOPLASM MALIGNANT BY SITE                     | 0                                       | 0          | 1                                          | 0.4751        | 0(0-Inf)               |
| ANGIODYSPLASIA, GASTROINTESTINAL                                       | 0                                       | 0          | 4                                          | 1.3634        | 0(0-Inf)               |
| ANGIODYSPLASIA, INTESTINE, ACQUIRED (INCLUDE LOSS OF VASCULAR PATTERN) | 2                                       | 16.7626    | 66                                         | 25.0845       | 0.6682(0.1632-2.7362)  |
| ANGIODYSPLASIA, INTESTINE, CONGENITAL                                  | 0                                       | 0          | 2                                          | 1.1972        | 0(0-Inf)               |
| ANGIODYSPLASIA, NOS                                                    | 0                                       | 0          | 9                                          | 5.1249        | 0(0-Inf)               |
| ANGIODYSPLASIA, STOMACH, ACQUIRED (INCLUDE LOSS OF VASCULAR PATTERN)   | 2                                       | 18.1558    | 14                                         | 6.06          | 2.996(0.6739-13.3188)  |
| ANGIODYSPLASIA, STOMACH, CONGENITAL                                    | 0                                       | 0          | 2                                          | 0.7896        | 0(0-Inf)               |
| ANGIOEDEMA                                                             | 7                                       | 49.0787    | 280                                        | 68.3936       | 0.7176(0.3384-1.5216)  |
| ANGIOFIBROMA CODE ALSO HEMANGIOMA BY SITE                              | 0                                       | 0          | 13                                         | 3.847         | 0(0-Inf)               |
| ANGIOKERATOMA, CONGENITAL                                              | 0                                       | 0          | 5                                          | 1.3795        | 0(0-Inf)               |
| ANGIOKERATOMA, NOS, CODE ALSO NEO BENIGN BY SITE                       | 0                                       | 0          | 12                                         | 4.0043        | 0(0-Inf)               |
| ANGIOKERATOMA, OF FORDYCE                                              | 0                                       | 0          | 8                                          | 2.136         | 0(0-Inf)               |
| ANGIOLEIOMYOMA, NOS, CODE ALSO NEO BENIGN BY SITE                      | 1                                       | 6.9322     | 3                                          | 0.7347        | 9.4354(0.9427-94.4409) |
| ANGIOLIPOMA CODE ALSO LIPOMA BY SITE                                   | 1                                       | 6.9378     | 48                                         | 11.9894       | 0.5787(0.0796-4.2068)  |
| ANGIOMA, BRAIN                                                         | 0                                       | 0          | 4                                          | 1.0352        | 0(0-Inf)               |
| ANGIOMA, BRAIN, CAVERNOUS                                              | 0                                       | 0          | 2                                          | 0.4681        | 0(0-Inf)               |
| ANGIOMA, CAVERNOUS, CODE ALSO ANGIOMA, NEC, BY SITE                    | 0                                       | 0          | 2                                          | 0.432         | 0(0-Inf)               |
| ANGIOMA, CHERRY (CAMPBELL DE MORGAN'S SPOTS)                           | 26                                      | 205.8557   | 583                                        | 200.4456      | 1.027(0.6925-1.523)    |
| ANGIOMA, NEC, HEAD                                                     | 0                                       | 0          | 14                                         | 3.3556        | 0(0-Inf)               |
| ANGIOMA, NEC, LOWER EXTREMITY                                          | 0                                       | 0          | 3                                          | 0.8875        | 0(0-Inf)               |
| ANGIOMA, NEC, SEE ALSO HEMANGIOMA BY SITE                              | 1                                       | 7.0922     | 34                                         | 8.1734        | 0.8677(0.1182-6.3675)  |
| ANGIOMA, NEC, TRUNK                                                    | 0                                       | 0          | 8                                          | 1.8764        | 0(0-Inf)               |
| ANGIOMA, RETINA                                                        | 0                                       | 0          | 3                                          | 0.9165        | 0(0-Inf)               |
| ANGIOMA, SENILE                                                        | 0                                       | 0          | 10                                         | 2.46          | 0(0-Inf)               |
| ANGIOMA, SKIN, HEAD                                                    | 1                                       | 7.0529     | 24                                         | 6.5209        | 1.0816(0.1454-8.0474)  |
| ANGIOMA, SKIN, LOWER EXTREMITY                                         | 0                                       | 0          | 5                                          | 1.1873        | 0(0-Inf)               |
| ANGIOMA, SKIN, NECK                                                    | 0                                       | 0          | 3                                          | 1.5109        | 0(0-Inf)               |
| ANGIOMA, SKIN, NOS                                                     | 15                                      | 115.4694   | 347                                        | 113.6787      | 1.0158(0.6048-1.7059)  |
| ANGIOMA, SKIN, TRUNK                                                   | 3                                       | 21.0998    | 28                                         | 6.6953        | 3.1514(0.9492-10.4635) |
| ANGIOMA, SKIN, UPPER EXTREMITY                                         | 0                                       | 0          | 11                                         | 3.6508        | 0(0-Inf)               |
| ANGIOMA, SPIDER                                                        | 1                                       | 7.0763     | 49                                         | 11.0666       | 0.6394(0.0879-4.6489)  |
| ANGIOMA, STELLATE                                                      | 0                                       | 0          | 1                                          | 0.398         | 0(0-Inf)               |

| Description                                            | No. of Positive Cases with Disease Code | Case Rate* | No. of Positive Controls with Disease Code | Control Rate* | Relative Risk (95%CI)    |
|--------------------------------------------------------|-----------------------------------------|------------|--------------------------------------------|---------------|--------------------------|
| ANGIOMATOSIS, NOS, SEE ALSO HEMANGIOMA                 | 0                                       | 0          | 5                                          | 1.5557        | 0(0-Inf)                 |
| ANGIOMYOLIPOMA CODE ALSO LIPOMA BY SITE                | 2                                       | 13.8399    | 8                                          | 1.9405        | 7.132(1.4776-34.4235)    |
| ANGIOMYOMA CODE ALSO NEO BENIGN BY SITE                | 0                                       | 0          | 2                                          | 0.7897        | 0(0-Inf)                 |
| ANGIOPATHY, NOS                                        | 0                                       | 0          | 11                                         | 6.9036        | 0(0-Inf)                 |
| ANGIOPATHY, NOS, GASTROINTESTINAL                      | 1                                       | 9.6478     | 5                                          | 2.3694        | 4.0719(0.4676-35.4614)   |
| ANGIOSARCOMA CODE ALSO NEOPLASM MALIGNANT BY SITE      | 0                                       | 0          | 2                                          | 0.5709        | 0(0-Inf)                 |
| ANGIOSPASM, CEREBRAL                                   | 0                                       | 0          | 1                                          | 0.234         | 0(0-Inf)                 |
| ANGIOSPASM, NOS                                        | 0                                       | 0          | 1                                          | 0.234         | 0(0-Inf)                 |
| ANGULATION, INTESTINE, SEE ALSO OBSTRUCTION, INTESTINE | 1                                       | 8.5994     | 18                                         | 7.1389        | 1.2046(0.1596-9.0901)    |
| ANGULATION, WRIST, NOS                                 | 1                                       | 6.8945     | 5                                          | 1.2043        | 5.7249(0.6485-50.5352)   |
| ANHEDONIA, FEMALE                                      | 0                                       | 0          | 5                                          | 1.5648        | 0(0-Inf)                 |
| ANHEDONIA, MALE                                        | 1                                       | 8.601      | 2                                          | 0.8261        | 10.4117(0.9193-117.9169) |
| ANHIDROSIS                                             | 0                                       | 0          | 2                                          | 0.4681        | 0(0-Inf)                 |
| ANISEIKONIA                                            | 0                                       | 0          | 9                                          | 7.6999        | 0(0-Inf)                 |
| ANISOCORIA                                             | 1                                       | 6.931      | 35                                         | 8.6439        | 0.8018(0.1093-5.8817)    |
| ANISOMETROPIA, NOS                                     | 5                                       | 38.7348    | 146                                        | 48.4012       | 0.8003(0.3274-1.9559)    |
| ANKYLOSIS, ANKLE                                       | 0                                       | 0          | 3                                          | 0.7885        | 0(0-Inf)                 |
| ANKYLOSIS, ELBOW                                       | 0                                       | 0          | 3                                          | 0.7798        | 0(0-Inf)                 |
| ANKYLOSIS, FINGER                                      | 1                                       | 6.9682     | 6                                          | 1.3892        | 5.0161(0.5884-42.7601)   |
| ANKYLOSIS, HIP                                         | 0                                       | 0          | 7                                          | 2.0571        | 0(0-Inf)                 |
| ANKYLOSIS, JOINT, NOS                                  | 0                                       | 0          | 1                                          | 0.8271        | 0(0-Inf)                 |
| ANKYLOSIS, KNEE                                        | 0                                       | 0          | 3                                          | 0.6536        | 0(0-Inf)                 |
| ANKYLOSIS, SHOULDER                                    | 0                                       | 0          | 3                                          | 1.5114        | 0(0-Inf)                 |
| ANKYLOSIS, SPECIFIED SITE, NEC                         | 0                                       | 0          | 6                                          | 1.7128        | 0(0-Inf)                 |
| ANKYLOSIS, TOOTH                                       | 1                                       | 7.0863     | 3                                          | 0.8142        | 8.7036(0.8708-86.9933)   |
| ANKYLOSIS, WRIST                                       | 0                                       | 0          | 2                                          | 0.8101        | 0(0-Inf)                 |
| ANNULAR PANCREAS                                       | 0                                       | 0          | 3                                          | 1.0582        | 0(0-Inf)                 |
| ANOMALY (DEFORMITY), BLADDER, NOS                      | 1                                       | 9.6214     | 5                                          | 2.3662        | 4.0662(0.4668-35.4196)   |
| ANOMALY, ALVEOLAR RIDGE                                | 0                                       | 0          | 6                                          | 1.713         | 0(0-Inf)                 |
| ANOMALY, APPENDIX                                      | 0                                       | 0          | 1                                          | 0.2729        | 0(0-Inf)                 |
| ANOMALY, ARTERY, NEC, CONGENITAL                       | 0                                       | 0          | 2                                          | 0.5069        | 0(0-Inf)                 |
| ANOMALY, BILIARY DUCT, CONGENITAL                      | 0                                       | 0          | 1                                          | 0.234         | 0(0-Inf)                 |
| ANOMALY, BLADDER, CONGENITAL                           | 0                                       | 0          | 2                                          | 0.432         | 0(0-Inf)                 |
| ANOMALY, BONE, NEC, CONGENITAL                         | 0                                       | 0          | 1                                          | 0.4049        | 0(0-Inf)                 |
| ANOMALY, BRAIN STEM                                    | 0                                       | 0          | 1                                          | 0.4049        | 0(0-Inf)                 |
| ANOMALY, BRAIN, NOS                                    | 0                                       | 0          | 1                                          | 0.2729        | 0(0-Inf)                 |
| ANOMALY, BRAIN, TYPE NEC                               | 0                                       | 0          | 2                                          | 0.4681        | 0(0-Inf)                 |
| ANOMALY, BREAST, CONGENITAL                            | 0                                       | 0          | 1                                          | 0.8276        | 0(0-Inf)                 |
| ANOMALY, CANAL OF NUCK, CONGENITAL                     | 0                                       | 0          | 1                                          | 0.398         | 0(0-Inf)                 |
| ANOMALY, CECUM, CONGENITAL                             | 0                                       | 0          | 1                                          | 0.2354        | 0(0-Inf)                 |

| Description                                               | No. of Positive Cases with Disease Code | Case Rate* | No. of Positive Controls with Disease Code | Control Rate* | Relative Risk (95%CI)   |
|-----------------------------------------------------------|-----------------------------------------|------------|--------------------------------------------|---------------|-------------------------|
| ANOMALY, CHROMOSOME, PHILADELPHIA (PH')                   | 0                                       | 0          | 2                                          | 1.7754        | 0(0-Inf)                |
| ANOMALY, CIRCULATORY SYSTEM, NEC                          | 0                                       | 0          | 1                                          | 0.8877        | 0(0-Inf)                |
| ANOMALY, CLAVICLE, CONGENITAL                             | 0                                       | 0          | 1                                          | 0.398         | 0(0-Inf)                |
| ANOMALY, COLON, CONGENITAL                                | 0                                       | 0          | 2                                          | 0.4681        | 0(0-Inf)                |
| ANOMALY, CONGENITAL, NOS                                  | 0                                       | 0          | 1                                          | 0.3526        | 0(0-Inf)                |
| ANOMALY, CORONARY ARTERY OR VEIN                          | 0                                       | 0          | 6                                          | 2.5204        | 0(0-Inf)                |
| ANOMALY, DENTITION                                        | 1                                       | 7.2099     | 0                                          | 0             | 12740575128.1796(0-Inf) |
| ANOMALY, DUODENUM, CONGENITAL                             | 0                                       | 0          | 1                                          | 0.3526        | 0(0-Inf)                |
| ANOMALY, EAR, CONGENITAL                                  | 0                                       | 0          | 4                                          | 0.8814        | 0(0-Inf)                |
| ANOMALY, EAR, CONGENITAL, CAUSING IMPAIRMENT OF HEARING   | 0                                       | 0          | 1                                          | 0.4048        | 0(0-Inf)                |
| ANOMALY, EBSTEIN'S                                        | 0                                       | 0          | 1                                          | 0.2354        | 0(0-Inf)                |
| ANOMALY, EISENMENGER'S                                    | 0                                       | 0          | 1                                          | 0.2729        | 0(0-Inf)                |
| ANOMALY, EPIGLOTTIS, CONGENITAL                           | 0                                       | 0          | 2                                          | 0.9502        | 0(0-Inf)                |
| ANOMALY, ESOPHAGUS, CONGENITAL                            | 0                                       | 0          | 1                                          | 0.8536        | 0(0-Inf)                |
| ANOMALY, EYE NEC                                          | 0                                       | 0          | 4                                          | 1.1119        | 0(0-Inf)                |
| ANOMALY, EYE, CONGENITAL                                  | 0                                       | 0          | 2                                          | 1.2659        | 0(0-Inf)                |
| ANOMALY, EYELID, CONGENITAL                               | 0                                       | 0          | 1                                          | 0.3527        | 0(0-Inf)                |
| ANOMALY, FACE, CONGENITAL                                 | 0                                       | 0          | 1                                          | 1.0359        | 0(0-Inf)                |
| ANOMALY, FINGER, CONGENITAL                               | 0                                       | 0          | 1                                          | 0.3526        | 0(0-Inf)                |
| ANOMALY, FOOT, CONGENITAL                                 | 0                                       | 0          | 3                                          | 0.7065        | 0(0-Inf)                |
| ANOMALY, FOREARM, CONGENITAL                              | 0                                       | 0          | 1                                          | 0.3526        | 0(0-Inf)                |
| ANOMALY, FRENUM, CONGENITAL                               | 0                                       | 0          | 3                                          | 0.9608        | 0(0-Inf)                |
| ANOMALY, GENITAL ORGAN, FEMALE, INTERNAL, NEC, CONGENITAL | 0                                       | 0          | 1                                          | 0.827         | 0(0-Inf)                |
| ANOMALY, GENITAL ORGAN, FEMALE, NOS                       | 0                                       | 0          | 2                                          | 0.591         | 0(0-Inf)                |
| ANOMALY, GENITAL ORGAN, MALE, NOS                         | 0                                       | 0          | 1                                          | 0.2729        | 0(0-Inf)                |
| ANOMALY, GUM, CONGENITAL                                  | 0                                       | 0          | 1                                          | 0.4751        | 0(0-Inf)                |
| ANOMALY, HAIR, CONGENITAL, NOS                            | 0                                       | 0          | 1                                          | 0.4751        | 0(0-Inf)                |
| ANOMALY, HAND, CONGENITAL                                 | 0                                       | 0          | 2                                          | 0.432         | 0(0-Inf)                |
| ANOMALY, HIP, CONGENITAL                                  | 0                                       | 0          | 4                                          | 1.0274        | 0(0-Inf)                |
| ANOMALY, JAW, SIZE                                        | 0                                       | 0          | 1                                          | 0.4751        | 0(0-Inf)                |
| ANOMALY, KIDNEY, CONGENITAL                               | 0                                       | 0          | 3                                          | 0.6986        | 0(0-Inf)                |
| ANOMALY, LACRIMAL PASSAGES                                | 0                                       | 0          | 1                                          | 0.405         | 0(0-Inf)                |
| ANOMALY, LEUKOCYTES                                       | 0                                       | 0          | 1                                          | 0.2354        | 0(0-Inf)                |
| ANOMALY, LUMBOSACRAL, CONGENITAL, NOS                     | 0                                       | 0          | 4                                          | 1.4118        | 0(0-Inf)                |
| ANOMALY, MANDIBLE                                         | 0                                       | 0          | 1                                          | 0.2355        | 0(0-Inf)                |
| ANOMALY, MANDIBLE SIZE                                    | 0                                       | 0          | 1                                          | 0.398         | 0(0-Inf)                |
| ANOMALY, MAXILLA                                          | 0                                       | 0          | 1                                          | 0.4751        | 0(0-Inf)                |
| ANOMALY, MESENTERY, CONGENITAL                            | 0                                       | 0          | 1                                          | 0.234         | 0(0-Inf)                |
| ANOMALY, NAIL, CONGENITAL, NOS                            | 0                                       | 0          | 2                                          | 0.4853        | 0(0-Inf)                |

| Description                                                      | No. of Positive Cases with Disease Code | Case Rate* | No. of Positive Controls with Disease Code | Control Rate* | Relative Risk (95%CI)    |
|------------------------------------------------------------------|-----------------------------------------|------------|--------------------------------------------|---------------|--------------------------|
| ANOMALY, NERVOUS SYSTEM, NEC, CONGENITAL                         | 0                                       | 0          | 1                                          | 0.234         | 0(0-Inf)                 |
| ANOMALY, NERVOUS SYSTEM, NOS, CONGENITAL                         | 0                                       | 0          | 2                                          | 0.6775        | 0(0-Inf)                 |
| ANOMALY, OPTIC NERVE, CONGENITAL                                 | 0                                       | 0          | 1                                          | 0.398         | 0(0-Inf)                 |
| ANOMALY, ORBIT                                                   | 0                                       | 0          | 1                                          | 0.234         | 0(0-Inf)                 |
| ANOMALY, ORIGIN, CORONARY ARTERY                                 | 0                                       | 0          | 1                                          | 0.8877        | 0(0-Inf)                 |
| ANOMALY, PALATE, CONGENITAL                                      | 0                                       | 0          | 4                                          | 1.0586        | 0(0-Inf)                 |
| ANOMALY, PANCREAS, CONGENITAL                                    | 0                                       | 0          | 2                                          | 0.5475        | 0(0-Inf)                 |
| ANOMALY, PAROTID, CONGENITAL                                     | 0                                       | 0          | 1                                          | 0.4751        | 0(0-Inf)                 |
| ANOMALY, PETER'S                                                 | 0                                       | 0          | 1                                          | 0.8878        | 0(0-Inf)                 |
| ANOMALY, PIGMENTATION, NEC                                       | 1                                       | 9.276      | 3                                          | 0.7853        | 11.8127(1.1864-117.6129) |
| ANOMALY, PROSTATE, CONGENITAL                                    | 0                                       | 0          | 1                                          | 0.3526        | 0(0-Inf)                 |
| ANOMALY, PULMONARY VENOUS DRAINAGE, NOS                          | 0                                       | 0          | 1                                          | 0.2729        | 0(0-Inf)                 |
| ANOMALY, PYLORUS, CONGENITAL                                     | 0                                       | 0          | 1                                          | 0.3526        | 0(0-Inf)                 |
| ANOMALY, RIB, NOS, CONGENITAL                                    | 0                                       | 0          | 2                                          | 0.7052        | 0(0-Inf)                 |
| ANOMALY, SACRUM, CONGENITAL                                      | 0                                       | 0          | 1                                          | 0.234         | 0(0-Inf)                 |
| ANOMALY, SALIVARY GLAND OR DUCT, CONGENITAL                      | 0                                       | 0          | 1                                          | 0.2729        | 0(0-Inf)                 |
| ANOMALY, SINUS OF VALSALVA, CONGENITAL                           | 0                                       | 0          | 1                                          | 0.2729        | 0(0-Inf)                 |
| ANOMALY, SKELETAL, CONGENITAL, NOS                               | 0                                       | 0          | 2                                          | 0.8725        | 0(0-Inf)                 |
| ANOMALY, SKIN, CONGENITAL, NOS                                   | 0                                       | 0          | 1                                          | 0.4751        | 0(0-Inf)                 |
| ANOMALY, SPINAL CORD, CONGENITAL                                 | 0                                       | 0          | 3                                          | 0.9608        | 0(0-Inf)                 |
| ANOMALY, SPINE, CONGENITAL, NOS                                  | 0                                       | 0          | 12                                         | 3.1615        | 0(0-Inf)                 |
| ANOMALY, STOMACH, CONGENITAL                                     | 0                                       | 0          | 2                                          | 0.4709        | 0(0-Inf)                 |
| ANOMALY, SUBCLAVIAN ARTERY, CONGENITAL                           | 0                                       | 0          | 2                                          | 0.5709        | 0(0-Inf)                 |
| ANOMALY, TERMINATION, PULMONARY VEIN TO RIGHT SUPERIOR VENA CAVA | 0                                       | 0          | 1                                          | 1.0363        | 0(0-Inf)                 |
| ANOMALY, TESTICLE, CONGENITAL                                    | 0                                       | 0          | 1                                          | 0.2729        | 0(0-Inf)                 |
| ANOMALY, THORAX (CHEST), CONGENITAL                              | 0                                       | 0          | 1                                          | 0.4751        | 0(0-Inf)                 |
| ANOMALY, THROAT, CONGENITAL                                      | 1                                       | 11.6708    | 0                                          | 0             | 8828944044.0792(0-Inf)   |
| ANOMALY, THUMB, CONGENITAL                                       | 0                                       | 0          | 2                                          | 0.7961        | 0(0-Inf)                 |
| ANOMALY, THYMUS, CONGENITAL                                      | 0                                       | 0          | 1                                          | 0.234         | 0(0-Inf)                 |
| ANOMALY, TOE, CONGENITAL                                         | 0                                       | 0          | 3                                          | 0.8456        | 0(0-Inf)                 |
| ANOMALY, TRACHEA, CONGENITAL                                     | 0                                       | 0          | 1                                          | 0.2354        | 0(0-Inf)                 |
| ANOMALY, UMBILICAL CORD                                          | 0                                       | 0          | 1                                          | 0.2354        | 0(0-Inf)                 |
| ANOMALY, URETER, OBSTRUCTIVE, CONGENITAL                         | 0                                       | 0          | 1                                          | 0.398         | 0(0-Inf)                 |
| ANOMALY, URETHRA, CONGENITAL                                     | 0                                       | 0          | 1                                          | 0.2354        | 0(0-Inf)                 |
| ANOMALY, UTERUS, CONGENITAL                                      | 0                                       | 0          | 1                                          | 0.827         | 0(0-Inf)                 |
| ANOMALY, VASCULAR, NEC, CONGENITAL                               | 0                                       | 0          | 3                                          | 1.2106        | 0(0-Inf)                 |
| ANOMALY, VEIN, NEC/NOS, CONGENITAL                               | 0                                       | 0          | 1                                          | 0.398         | 0(0-Inf)                 |
| ANOMALY, VEIN, RETINA, CONGENITAL                                | 0                                       | 0          | 1                                          | 0.398         | 0(0-Inf)                 |
| ANOMALY, VENTRICULAR SEPTUM                                      | 0                                       | 0          | 1                                          | 0.8532        | 0(0-Inf)                 |

| Description                                                | No. of Positive Cases with Disease Code | Case Rate* | No. of Positive Controls with Disease Code | Control Rate* | Relative Risk (95%CI)   |
|------------------------------------------------------------|-----------------------------------------|------------|--------------------------------------------|---------------|-------------------------|
| ANOMIA                                                     | 1                                       | 11.9552    | 12                                         | 7.78          | 1.5367(0.1983-11.9077)  |
| ANOPHTHALMOS, ACQUIRED                                     | 0                                       | 0          | 1                                          | 0.234         | 0(0-Inf)                |
| ANOPHTHALMOS, NOS                                          | 0                                       | 0          | 1                                          | 0.234         | 0(0-Inf)                |
| ANOPSIA                                                    | 1                                       | 7.7813     | 2                                          | 0.6825        | 11.401(0.9965-130.4361) |
| ANOREXIA, NERVOSA                                          | 0                                       | 0          | 2                                          | 0.4681        | 0(0-Inf)                |
| ANOREXIA, NOS                                              | 23                                      | 299.6403   | 396                                        | 289.4298      | 1.0353(0.6792-1.5779)   |
| ANORGASMIA                                                 | 0                                       | 0          | 10                                         | 3.0985        | 0(0-Inf)                |
| ANOSMIA                                                    | 0                                       | 0          | 75                                         | 18.4048       | 0(0-Inf)                |
| ANOVULATION                                                | 0                                       | 0          | 10                                         | 4.5784        | 0(0-Inf)                |
| ANOVULATORY CYCLE (BLEEDING)                               | 0                                       | 0          | 9                                          | 3.5852        | 0(0-Inf)                |
| ANOXIA, CEREBRAL                                           | 0                                       | 0          | 5                                          | 2.4562        | 0(0-Inf)                |
| ANOXIA, NOS                                                | 0                                       | 0          | 4                                          | 1.3628        | 0(0-Inf)                |
| ANTERIOR BASEMENT MEMBRANE                                 | 2                                       | 16.2061    | 46                                         | 16.4939       | 0.9826(0.2374-4.0664)   |
| ANTHRACOSIS                                                | 0                                       | 0          | 8                                          | 2.174         | 0(0-Inf)                |
| ANTIBODY POSITIVE HTLV-III                                 | 0                                       | 0          | 2                                          | 1.1616        | 0(0-Inf)                |
| ANTIBODY-ANTIGEN REACTIONS (ANTINUCLEAR ANTIBODIES)        | 1                                       | 6.9861     | 78                                         | 20.2841       | 0.3444(0.0478-2.4814)   |
| ANTIMETROPIA                                               | 0                                       | 0          | 3                                          | 1.7287        | 0(0-Inf)                |
| ANTRITIS, STOMACH                                          | 7                                       | 60.4879    | 221                                        | 88.4736       | 0.6837(0.3216-1.4532)   |
| ANURIA, NOS                                                | 1                                       | 16.9764    | 7                                          | 7.1281        | 2.3816(0.2908-19.5056)  |
| ANXIETY, SEPARATION (CHILDHOOD), CODE ALSO REACTION BY AGE | 0                                       | 0          | 1                                          | 0.888         | 0(0-Inf)                |
| ANXIETY, STATE--ANX                                        | 107                                     | 827.4573   | 3184                                       | 890.6269      | 0.9291(0.7659-1.1271)   |
| AORTITIS, NOS                                              | 0                                       | 0          | 5                                          | 2.2762        | 0(0-Inf)                |
| APHAKIA, NOS--APHK                                         | 11                                      | 85.68      | 175                                        | 56.925        | 1.5051(0.8163-2.7752)   |
| APHASIA, MOTOR                                             | 0                                       | 0          | 4                                          | 2.9838        | 0(0-Inf)                |
| APHASIA, NEOPLASTIC                                        | 0                                       | 0          | 1                                          | 0.405         | 0(0-Inf)                |
| APHASIA, NOS                                               | 12                                      | 147.1964   | 221                                        | 148.8461      | 0.9889(0.5523-1.7706)   |
| APHASIA, POST-SURGICAL                                     | 0                                       | 0          | 3                                          | 0.961         | 0(0-Inf)                |
| APHASIA, TRAUMATIC                                         | 0                                       | 0          | 1                                          | 0.398         | 0(0-Inf)                |
| APHASIA, VASCULAR                                          | 4                                       | 30.9305    | 51                                         | 16.8143       | 1.8395(0.6614-5.1165)   |
| APHASIA, WERNICKE'S                                        | 0                                       | 0          | 6                                          | 5.6479        | 0(0-Inf)                |
| APHONIA, FUNCTIONAL, HYSTERICAL                            | 0                                       | 0          | 1                                          | 0.234         | 0(0-Inf)                |
| APHONIA, NOS                                               | 0                                       | 0          | 12                                         | 3.5103        | 0(0-Inf)                |
| APHONIA, PSYCHOGENIC                                       | 0                                       | 0          | 1                                          | 0.8274        | 0(0-Inf)                |
| APHTHAE (EPIZOOTIC)(FOOT-MOUTH DISEASE)                    | 2                                       | 16.9754    | 1                                          | 0.3907        | 43.454(3.7984-497.1146) |
| APHTHOSIS (COMPLEX) SEE ALSO ULCER                         | 0                                       | 0          | 2                                          | 0.432         | 0(0-Inf)                |
| APLASIA, RED CELL, NOS                                     | 0                                       | 0          | 1                                          | 0.3526        | 0(0-Inf)                |
| APNEA, CAUSE SPECIFIED                                     | 0                                       | 0          | 7                                          | 1.8638        | 0(0-Inf)                |
| APNEA, NOS                                                 | 5                                       | 34.8282    | 148                                        | 38.6857       | 0.9003(0.3686-2.1992)   |
| APNEA, SLEEP                                               | 46                                      | 360.8059   | 1431                                       | 496.3179      | 0.727(0.5417-0.9756)    |

| Description                                    | No. of Positive Cases with Disease Code | Case Rate* | No. of Positive Controls with Disease Code | Control Rate* | Relative Risk (95%CI)   |
|------------------------------------------------|-----------------------------------------|------------|--------------------------------------------|---------------|-------------------------|
| APNEUSTIC BREATHING, NOS                       | 0                                       | 0          | 1                                          | 0.2729        | 0(0-Inf)                |
| APOPHYSITIS                                    | 0                                       | 0          | 1                                          | 0.4751        | 0(0-Inf)                |
| APOPLEXIA, PITUITARY                           | 0                                       | 0          | 1                                          | 0.2729        | 0(0-Inf)                |
| APPENDAGE ATRIUM                               | 0                                       | 0          | 2                                          | 0.7896        | 0(0-Inf)                |
| APPENDICITIS, ACUTE (GANGRENOUS)               | 3                                       | 21.0252    | 198                                        | 49.4033       | 0.4256(0.1359-1.3327)   |
| APPENDICITIS, ACUTE, PERFORATED                | 3                                       | 21.1437    | 59                                         | 16.0688       | 1.3158(0.4107-4.2154)   |
| APPENDICITIS, ACUTE, RUPTURED                  | 2                                       | 14.2846    | 10                                         | 2.4486        | 5.8337(1.2566-27.0831)  |
| APPENDICITIS, CHRONIC                          | 0                                       | 0          | 22                                         | 5.9398        | 0(0-Inf)                |
| APPENDICITIS, NOS                              | 0                                       | 0          | 32                                         | 10.7245       | 0(0-Inf)                |
| APPENDICITIS, SUBACUTE                         | 0                                       | 0          | 4                                          | 2.5333        | 0(0-Inf)                |
| APPENDIX, EPIDIDYMIS                           | 0                                       | 0          | 1                                          | 0.3526        | 0(0-Inf)                |
| APPREHENSION                                   | 0                                       | 0          | 2                                          | 1.0786        | 0(0-Inf)                |
| APRAXIA, GAIT, SEE ALSO DISTURBANCE            | 2                                       | 33.2341    | 29                                         | 29.681        | 1.1197(0.2664-4.707)    |
| APRAXIA, NOS, (SPEECH) SEE ALSO APHASIA        | 3                                       | 34.6017    | 48                                         | 29.6628       | 1.1665(0.3621-3.7583)   |
| APRAXIA, ORAL, VERBAL                          | 0                                       | 0          | 11                                         | 4.4618        | 0(0-Inf)                |
| ARACHNOIDITIS (SEE ALSO MENINGITIS)            | 0                                       | 0          | 10                                         | 2.6055        | 0(0-Inf)                |
| ARCUS, SENILIS                                 | 2                                       | 14.6123    | 13                                         | 3.8984        | 3.7482(0.8349-16.827)   |
| AREFLEXIA, BLADDER (NEUROGENIC #)              | 0                                       | 0          | 5                                          | 2.7037        | 0(0-Inf)                |
| AREFLEXIA, DETRUSOR (INCONTINENCE #)           | 5                                       | 47.6945    | 54                                         | 24.9046       | 1.9151(0.7627-4.8087)   |
| AREFLEXIA, PUPILLARY                           | 1                                       | 6.8786     | 0                                          | 0             | 12223757358.1301(0-Inf) |
| ARGYLL-ROBERTSON PUPIL, NOS                    | 0                                       | 0          | 1                                          | 0.398         | 0(0-Inf)                |
| ARREST, CARDIAC                                | 12                                      | 142.9614   | 223                                        | 143.0942      | 0.9991(0.5581-1.7884)   |
| ARREST, CARDIAC, OUT OF HOSPITAL (DEATH)       | 0                                       | 0          | 5                                          | 4.4384        | 0(0-Inf)                |
| ARREST, CARDIAC, OUT OF HOSPITAL (REVIVED)     | 1                                       | 9.0206     | 45                                         | 19.4958       | 0.4627(0.0636-3.3646)   |
| ARREST, RESPIRATORY (PULMONARY)                | 5                                       | 67.915     | 117                                        | 90.1041       | 0.7537(0.3075-1.8477)   |
| ARREST, SINUS                                  | 3                                       | 29.219     | 18                                         | 8.6144        | 3.3919(0.9896-11.6252)  |
| ARRHYTHMIA, ATRIAL                             | 2                                       | 20.0429    | 51                                         | 25.5004       | 0.786(0.1908-3.2385)    |
| ARRHYTHMIA, EXTRASYSTOLE                       | 0                                       | 0          | 5                                          | 1.1789        | 0(0-Inf)                |
| ARRHYTHMIA, NOS                                | 17                                      | 182.7942   | 323                                        | 176.2762      | 1.037(0.6359-1.6911)    |
| ARRHYTHMIA, SINUS                              | 3                                       | 27.5044    | 60                                         | 26.2709       | 1.047(0.3273-3.3491)    |
| ARRHYTHMIA, VENTRICULAR                        | 4                                       | 36.6935    | 87                                         | 38.4691       | 0.9538(0.3493-2.605)    |
| ARTERIOMEGALY SEE ALSO HYPERTROPHY             | 0                                       | 0          | 8                                          | 4.6046        | 0(0-Inf)                |
| ARTERIOPATHY, NEC                              | 0                                       | 0          | 4                                          | 1.5793        | 0(0-Inf)                |
| ARTERIOPATHY, NOS                              | 0                                       | 0          | 2                                          | 1.8979        | 0(0-Inf)                |
| ARTERIOSCLEROSIS, AORTA, ABDOMINAL             | 7                                       | 67.8244    | 135                                        | 64.409        | 1.053(0.4916-2.2555)    |
| ARTERIOSCLEROSIS, AORTA, NEC                   | 2                                       | 16.3767    | 74                                         | 27.324        | 0.5994(0.1468-2.4475)   |
| ARTERIOSCLEROSIS, AORTA, THORACIC (DESCENDING) | 1                                       | 9.5949     | 19                                         | 8.936         | 1.0737(0.1429-8.0678)   |
| ARTERIOSCLEROSIS, ARTERY, NEC                  | 0                                       | 0          | 4                                          | 1.5024        | 0(0-Inf)                |
| ARTERIOSCLEROSIS, BASILAR ARTERY               | 0                                       | 0          | 7                                          | 3.3489        | 0(0-Inf)                |
| ARTERIOSCLEROSIS, BRAIN                        | 1                                       | 9.265      | 9                                          | 4.0129        | 2.3088(0.289-18.4441)   |

| Description                                                  | No. of Positive Cases with Disease Code | Case Rate* | No. of Positive Controls with Disease Code | Control Rate* | Relative Risk (95%CI)    |
|--------------------------------------------------------------|-----------------------------------------|------------|--------------------------------------------|---------------|--------------------------|
| ARTERIOSCLEROSIS, CAROTID ARTERY                             | 11                                      | 93.8513    | 390                                        | 152.5576      | 0.6152(0.3375-1.1213)    |
| ARTERIOSCLEROSIS, CEREBRAL                                   | 2                                       | 20.8849    | 21                                         | 11.1572       | 1.8719(0.436-8.0372)     |
| ARTERIOSCLEROSIS, CORONARY                                   | 9                                       | 75.6742    | 364                                        | 140.8413      | 0.5373(0.2771-1.042)     |
| ARTERIOSCLEROSIS, EXTREMITY, LOWER, NOS                      | 7                                       | 85.5012    | 92                                         | 61.3091       | 1.3946(0.645-3.0151)     |
| ARTERIOSCLEROSIS, EXTREMITY, LOWER, WITH ISCHEMIA            | 0                                       | 0          | 5                                          | 3.6218        | 0(0-Inf)                 |
| ARTERIOSCLEROSIS, EXTREMITY, UPPER, NOS                      | 3                                       | 47.7461    | 10                                         | 10.0504       | 4.7507(1.2963-17.4098)   |
| ARTERIOSCLEROSIS, EYE                                        | 1                                       | 9.1751     | 3                                          | 1.316         | 6.9722(0.705-68.953)     |
| ARTERIOSCLEROSIS, FEMORAL ARTERY                             | 4                                       | 32.904     | 61                                         | 22.6527       | 1.4525(0.5261-4.0103)    |
| ARTERIOSCLEROSIS, ILIAC ARTERY                               | 0                                       | 0          | 58                                         | 16.8041       | 0(0-Inf)                 |
| ARTERIOSCLEROSIS, KIDNEY                                     | 0                                       | 0          | 4                                          | 1.7191        | 0(0-Inf)                 |
| ARTERIOSCLEROSIS, KIDNEY, ARTERIOLES                         | 0                                       | 0          | 1                                          | 0.8878        | 0(0-Inf)                 |
| ARTERIOSCLEROSIS, MESENTERIC ARTERY                          | 1                                       | 7.6415     | 4                                          | 1.2936        | 5.907(0.642-54.3529)     |
| ARTERIOSCLEROSIS, NOS                                        | 2                                       | 17.0283    | 60                                         | 23.3362       | 0.7297(0.1778-2.9944)    |
| ARTERIOSCLEROSIS, OBLITERANS, AORTA, SEE ALSO                |                                         |            |                                            |               |                          |
| ARTERIOSCLEROSIS                                             | 0                                       | 0          | 19                                         | 6.4673        | 0(0-Inf)                 |
| ARTERIOSCLEROSIS, OBLITERANS, FEMORAL ARTERY                 | 1                                       | 7.9692     | 17                                         | 6.1554        | 1.2947(0.1712-9.789)     |
| ARTERIOSCLEROSIS, OBLITERANS, ILIAC ARTERY                   | 1                                       | 7.5311     | 25                                         | 8.1481        | 0.9243(0.1246-6.8541)    |
| ARTERIOSCLEROSIS, OBLITERANS, LOWER EXTREMITY                | 17                                      | 185.7986   | 348                                        | 196.7172      | 0.9445(0.5798-1.5387)    |
| ARTERIOSCLEROSIS, OBLITERANS, LOWER EXTREMITY, WITH ISCHEMIA | 1                                       | 12.0418    | 15                                         | 9.7726        | 1.2322(0.1618-9.3833)    |
| ARTERIOSCLEROSIS, OBLITERANS, NOS--ASO                       | 66                                      | 724.2204   | 1259                                       | 675.6303      | 1.0719(0.8363-1.3739)    |
| ARTERIOSCLEROSIS, OBLITERANS, PERIPHERAL, NOS                | 1                                       | 10.6508    | 18                                         | 9.8376        | 1.0827(0.1437-8.1555)    |
| ARTERIOSCLEROSIS, OBLITERANS, POPLITEAL ARTERY               | 1                                       | 7.2156     | 2                                          | 0.4642        | 15.5433(1.3409-180.1719) |
| ARTERIOSCLEROSIS, OBLITERANS, SUBCLAVIAN ARTERY              | 0                                       | 0          | 1                                          | 0.3527        | 0(0-Inf)                 |
| ARTERIOSCLEROSIS, OBLITERANS, UPPER EXTREMITY                | 0                                       | 0          | 3                                          | 7.3796        | 0(0-Inf)                 |
| ARTERIOSCLEROSIS, OBLITERANS, UPPER EXTREMITY, WITH ISCHEMIA | 0                                       | 0          | 1                                          | 0.8877        | 0(0-Inf)                 |
| ARTERIOSCLEROSIS, PERIPHERAL, NOS                            | 1                                       | 9.4387     | 21                                         | 9.6399        | 0.9791(0.131-7.3174)     |
| ARTERIOSCLEROSIS, POPLITEAL ARTERY                           | 2                                       | 16.1668    | 35                                         | 12.698        | 1.2732(0.3047-5.3192)    |
| ARTERIOSCLEROSIS, RENAL ARTERY                               | 1                                       | 7.6078     | 31                                         | 9.9959        | 0.7611(0.1034-5.6008)    |
| ARTERIOSCLEROSIS, RETINA                                     | 0                                       | 0          | 2                                          | 0.7053        | 0(0-Inf)                 |
| ARTERIOSCLEROSIS, SUBCLAVIAN ARTERY                          | 1                                       | 13.0629    | 12                                         | 8.6741        | 1.506(0.1946-11.6554)    |
| ARTERIOSCLEROSIS, TEMPORAL ARTERY                            | 0                                       | 0          | 8                                          | 5.9485        | 0(0-Inf)                 |
| ARTERIOSCLEROSIS, VALVE, AORTIC                              | 0                                       | 0          | 2                                          | 1.1973        | 0(0-Inf)                 |
| ARTERIOSCLEROSIS, VERTEBRAL ARTERY                           | 0                                       | 0          | 11                                         | 5.1906        | 0(0-Inf)                 |
| ARTERITIS, CRANIAL                                           | 0                                       | 0          | 6                                          | 2.1754        | 0(0-Inf)                 |
| ARTERITIS, GIANT CELL                                        | 4                                       | 41.8534    | 87                                         | 46.93         | 0.8918(0.3265-2.436)     |
| ARTERITIS, GRANULOMATOUS                                     | 0                                       | 0          | 7                                          | 2.8572        | 0(0-Inf)                 |
| ARTERITIS, NOS                                               | 1                                       | 7.3089     | 8                                          | 2.4067        | 3.0368(0.374-24.6606)    |
| ARTERITIS, PULMONARY                                         | 0                                       | 0          | 1                                          | 0.2729        | 0(0-Inf)                 |

| Description                                                           | No. of Positive Cases with Disease Code | Case Rate* | No. of Positive Controls with Disease Code | Control Rate* | Relative Risk (95%CI)    |
|-----------------------------------------------------------------------|-----------------------------------------|------------|--------------------------------------------|---------------|--------------------------|
| ARTERITIS, TAKAYASU'S                                                 | 0                                       | 0          | 1                                          | 0.4049        | 0(0-Inf)                 |
| ARTERITIS, TEMPORAL                                                   | 5                                       | 47.1898    | 101                                        | 46.5319       | 1.0141(0.412-2.4963)     |
| ARTHRALGIA (SEE ALSO PAIN)                                            | 30                                      | 214.6127   | 830                                        | 205.2436      | 1.0456(0.7256-1.5069)    |
| ARTHRITIS, ACUTE                                                      | 5                                       | 37.3969    | 183                                        | 56.7102       | 0.6594(0.2707-1.6062)    |
| ARTHRITIS, CRYSTALLINE                                                | 0                                       | 0          | 13                                         | 10.6892       | 0(0-Inf)                 |
| ARTHRITIS, DEGENERATIVE, SEE ALSO DISEASE, DEGENERATIVE JOINT         | 22                                      | 203.8064   | 706                                        | 314.413       | 0.6482(0.4237-0.9917)    |
| ARTHRITIS, DEGENERATIVE, SPINE, SEE ALSO DISEASE, DEGENERATIVE, SPINE | 7                                       | 64.8541    | 75                                         | 33.4397       | 1.9394(0.8902-4.2254)    |
| ARTHRITIS, DRUG-INDUCED                                               | 0                                       | 0          | 2                                          | 0.4709        | 0(0-Inf)                 |
| ARTHRITIS, EXTREMITY, LOWER                                           | 44                                      | 351.5252   | 1202                                       | 408.6663      | 0.8602(0.6362-1.163)     |
| ARTHRITIS, EXTREMITY, UPPER                                           | 40                                      | 299.9651   | 1188                                       | 356.6709      | 0.841(0.6132-1.1534)     |
| ARTHRITIS, GOUTY                                                      | 11                                      | 84.0392    | 220                                        | 73.1149       | 1.1494(0.6261-2.11)      |
| ARTHRITIS, HYPERTROPHIC, SEE ALSO DISEASE, DEGENERATIVE JOINT         | 0                                       | 0          | 2                                          | 0.432         | 0(0-Inf)                 |
| ARTHRITIS, MONOARTICULAR                                              | 5                                       | 36.1185    | 80                                         | 23.0508       | 1.5669(0.6323-3.8833)    |
| ARTHRITIS, NEUROPATHIC, (SHOULDER)                                    | 0                                       | 0          | 1                                          | 0.234         | 0(0-Inf)                 |
| ARTHRITIS, NOS                                                        | 31                                      | 258.0316   | 1022                                       | 378.0181      | 0.6826(0.4771-0.9765)    |
| ARTHRITIS, PATELLOFEMORAL                                             | 2                                       | 14.8132    | 109                                        | 32.9266       | 0.4499(0.1109-1.8256)    |
| ARTHRITIS, POST-TRAUMATIC                                             | 4                                       | 27.8271    | 117                                        | 29.4837       | 0.9438(0.3475-2.5635)    |
| ARTHRITIS, PSORIATIC                                                  | 2                                       | 14.1733    | 60                                         | 14.6054       | 0.9704(0.2363-3.9849)    |
| ARTHRITIS, RHEUMATOID, ACUTE                                          | 0                                       | 0          | 8                                          | 2.3657        | 0(0-Inf)                 |
| ARTHRITIS, RHEUMATOID, CHRONIC                                        | 0                                       | 0          | 37                                         | 11.7398       | 0(0-Inf)                 |
| ARTHRITIS, RHEUMATOID, CLASSICAL                                      | 0                                       | 0          | 4                                          | 0.8642        | 0(0-Inf)                 |
| ARTHRITIS, RHEUMATOID, JUVENILE                                       | 1                                       | 11.5529    | 1                                          | 0.2566        | 45.0161(2.677-756.9984)  |
| ARTHRITIS, RHEUMATOID, POSSIBLE                                       | 1                                       | 7.5912     | 56                                         | 17.9224       | 0.4236(0.0585-3.0679)    |
| ARTHRITIS, RHEUMATOID, PROBABLE                                       | 3                                       | 22.0218    | 40                                         | 11.8165       | 1.8636(0.5728-6.0633)    |
| ARTHRITIS, RHEUMATOID--RA (CODE ALSO SITE IF STATED)                  | 24                                      | 170.3278   | 468                                        | 119.2649      | 1.4281(0.9459-2.1562)    |
| ARTHRITIS, SEPTIC, NOS, SEE ALSO INFECTION BY JOINT                   | 1                                       | 8.6556     | 18                                         | 7.2325        | 1.1968(0.1587-9.0254)    |
| ARTHRITIS, SERONEGATIVE                                               | 1                                       | 7.7656     | 97                                         | 32.2933       | 0.2405(0.0335-1.7272)    |
| ARTHRITIS, SPINE, SEE ALSO SPONDYLITIS                                | 5                                       | 40.9159    | 41                                         | 14.9127       | 2.7437(1.0768-6.9911)    |
| ARTHRITIS, STAPHYLOCOCCAL                                             | 0                                       | 0          | 1                                          | 0.3526        | 0(0-Inf)                 |
| ARTHRITIS, TEMPOROMANDIBULAR JOINT                                    | 0                                       | 0          | 23                                         | 10.3301       | 0(0-Inf)                 |
| ARTHRITIS, TRAUMATIC                                                  | 2                                       | 15.3694    | 46                                         | 11.0042       | 1.3967(0.3374-5.7823)    |
| ARTHRITIS, TUBERCULOUS                                                | 1                                       | 7.7864     | 1                                          | 0.338         | 23.0364(1.3506-392.9217) |
| ARTHRITIS, VIRAL                                                      | 0                                       | 0          | 2                                          | 0.7961        | 0(0-Inf)                 |
| ARTHROFIBROSIS (JOINT)                                                | 1                                       | 7.1025     | 20                                         | 5.6652        | 1.2537(0.1671-9.4071)    |
| ARTHROKATADYSIS                                                       | 0                                       | 0          | 4                                          | 0.884         | 0(0-Inf)                 |
| ARTHRO-OPHTHALMOPATHY, PROGRESSIVE                                    | 0                                       | 0          | 1                                          | 0.4751        | 0(0-Inf)                 |
| ARTHROPATHY, GOUTY                                                    | 0                                       | 0          | 4                                          | 3.0035        | 0(0-Inf)                 |



| Description                                                                                          | No. of Positive Cases with Disease Code | Case Rate* | No. of Positive Controls with Disease Code | Control Rate* | Relative Risk (95%CI)  |
|------------------------------------------------------------------------------------------------------|-----------------------------------------|------------|--------------------------------------------|---------------|------------------------|
| ARTHROPATHY, NEUROGENIC, CHARCOT                                                                     | 0                                       | 0          | 4                                          | 1.0398        | 0(0-Inf)               |
| ARTHROPATHY, NEUROPATHIC                                                                             | 1                                       | 7.0212     | 8                                          | 2.0941        | 3.3529(0.4111-27.3452) |
| ARTHROPATHY, NOS                                                                                     | 21                                      | 205.5493   | 636                                        | 304.5868      | 0.6748(0.4366-1.0432)  |
| ARTHROPATHY, PSORIATIC                                                                               | 1                                       | 7.2402     | 9                                          | 2.2065        | 3.2813(0.4095-26.2905) |
| ARTHROSIS, PATELLOFEMORAL                                                                            | 1                                       | 6.9379     | 21                                         | 5.1698        | 1.342(0.1791-10.0554)  |
| ARTHROSIS, SEE ALSO DEGENERATIVE JOINT DISEASE                                                       | 2                                       | 14.8686    | 12                                         | 3.7045        | 4.0137(0.8857-18.189)  |
| ARYTENOIDITIS (VOCAL CORD)                                                                           | 0                                       | 0          | 3                                          | 0.7884        | 0(0-Inf)               |
| ASBESTOSIS                                                                                           | 1                                       | 10.8591    | 36                                         | 20.438        | 0.5313(0.0727-3.8836)  |
| ASCARIASIS                                                                                           | 0                                       | 0          | 4                                          | 1.0712        | 0(0-Inf)               |
| ASCITES, CARDIAC                                                                                     | 0                                       | 0          | 3                                          | 1.9011        | 0(0-Inf)               |
| ASCITES, CHYLOUS                                                                                     | 0                                       | 0          | 2                                          | 1.1613        | 0(0-Inf)               |
| ASCITES, MALIGNANT                                                                                   | 5                                       | 34.6618    | 32                                         | 7.7799        | 4.4553(1.7173-11.5588) |
| ASCITES, NOS (ABDOMINAL OR PERITONEAL)                                                               | 8                                       | 70.5539    | 104                                        | 42.8391       | 1.6469(0.7998-3.3913)  |
| ASPERGILLOMA                                                                                         | 0                                       | 0          | 1                                          | 0.234         | 0(0-Inf)               |
| ASPERGILLOSIS                                                                                        | 3                                       | 21.1683    | 14                                         | 3.8645        | 5.4776(1.5517-19.3363) |
| ASPHYXIA, NOS                                                                                        | 0                                       | 0          | 1                                          | 0.4048        | 0(0-Inf)               |
| ASPHYXIA, STRANGULATION                                                                              | 1                                       | 11.664     | 0                                          | 0             | 8824117536.3051(0-Inf) |
| ASPIRATION, DUE TO FOREIGN BODY IN PHARYNX, LARYNX, NASOPHARYNX, AND THROAT (INCLUDES CHOKED ON REGU | 2                                       | 16.5941    | 39                                         | 14.58         | 1.1381(0.2735-4.7364)  |
| ASPIRATION, FOREIGN BODY (IN DIGESTIVE SYSTEM)                                                       | 0                                       | 0          | 1                                          | 0.4048        | 0(0-Inf)               |
| ASPIRATION, FOREIGN BODY (IN RESPIRATORY TRACT)                                                      | 1                                       | 19.0479    | 2                                          | 2.3949        | 7.9536(0.7089-89.2302) |
| ASPIRATION, MUCUS INTO LUNG                                                                          | 0                                       | 0          | 6                                          | 3.1074        | 0(0-Inf)               |
| ASPIRATION, NOS (RESPIRATORY)                                                                        | 10                                      | 171.6766   | 176                                        | 186.7551      | 0.9193(0.4855-1.7404)  |
| ASPLENIA, FUNCTIONAL                                                                                 | 0                                       | 0          | 1                                          | 0.4048        | 0(0-Inf)               |
| ASPLENIA, SYNDROME (IVEMARK'S)                                                                       | 0                                       | 0          | 1                                          | 0.3526        | 0(0-Inf)               |
| ASSAULT, NOS                                                                                         | 0                                       | 0          | 8                                          | 1.8478        | 0(0-Inf)               |
| ASSOCIATION, ATRIOVENTRICULAR                                                                        | 0                                       | 0          | 1                                          | 0.3526        | 0(0-Inf)               |
| ASTEATOSIS                                                                                           | 37                                      | 279.4119   | 723                                        | 218.6927      | 1.2776(0.9171-1.7799)  |
| ASTERIXIS, NOS                                                                                       | 0                                       | 0          | 1                                          | 0.8529        | 0(0-Inf)               |
| ASTHENIA, NERVOUS OR NEUROTIC                                                                        | 0                                       | 0          | 1                                          | 0.2729        | 0(0-Inf)               |
| ASTHENIA, NEUROCIRCULATORY                                                                           | 0                                       | 0          | 2                                          | 0.5838        | 0(0-Inf)               |
| ASTHENIA, NOS                                                                                        | 4                                       | 27.941     | 41                                         | 10.2975       | 2.7134(0.9647-7.6322)  |
| ASTHENIA, POST-VIRAL                                                                                 | 0                                       | 0          | 10                                         | 2.5427        | 0(0-Inf)               |
| ASTHENIA, PSYCHOGENIC OR PSYCHOPHYSIOLOGIC                                                           | 0                                       | 0          | 3                                          | 0.6549        | 0(0-Inf)               |
| ASTHENOPIA                                                                                           | 0                                       | 0          | 17                                         | 5.3887        | 0(0-Inf)               |
| ASTHMA, ALLERGIC                                                                                     | 4                                       | 32.0593    | 101                                        | 24.5315       | 1.3069(0.4796-3.5609)  |
| ASTHMA, BRONCHIAL                                                                                    | 9                                       | 68.261     | 265                                        | 62.8329       | 1.0864(0.558-2.1152)   |
| ASTHMA, BRONCHIAL, INTRINSIC                                                                         | 0                                       | 0          | 32                                         | 8.5626        | 0(0-Inf)               |
| ASTHMA, CARDIAC                                                                                      | 0                                       | 0          | 2                                          | 0.8098        | 0(0-Inf)               |
| ASTHMA, EXERCISE INDUCED                                                                             | 1                                       | 6.9442     | 26                                         | 6.5883        | 1.054(0.1421-7.8173)   |

| Description                                                     | No. of Positive Cases with Disease Code | Case Rate* | No. of Positive Controls with Disease Code | Control Rate* | Relative Risk (95%CI)    |
|-----------------------------------------------------------------|-----------------------------------------|------------|--------------------------------------------|---------------|--------------------------|
| ASTHMA, EXTRINSIC                                               | 0                                       | 0          | 17                                         | 4.37          | 0(0-Inf)                 |
| ASTHMA, NOS--ASTH                                               | 47                                      | 341.6779   | 1318                                       | 353.4516      | 0.9667(0.722-1.2942)     |
| ASTHMA, WITH COUGH                                              | 2                                       | 15.9625    | 53                                         | 18.4781       | 0.8639(0.2097-3.5589)    |
| ASTIGMATISM, COMPOUND                                           | 0                                       | 0          | 1                                          | 0.3526        | 0(0-Inf)                 |
| ASTIGMATISM, HYPEROPIC                                          | 26                                      | 224.8975   | 726                                        | 289.8622      | 0.7759(0.5242-1.1484)    |
| ASTIGMATISM, HYPEROPIC, COMPOUND                                | 1                                       | 8.4        | 12                                         | 2.8637        | 2.9332(0.3763-22.8622)   |
| ASTIGMATISM, IRREGULAR                                          | 0                                       | 0          | 8                                          | 2.9327        | 0(0-Inf)                 |
| ASTIGMATISM, MIXED                                              | 4                                       | 31.5349    | 236                                        | 57.5191       | 0.5483(0.2038-1.4746)    |
| ASTIGMATISM, MIXED, COMPOUND                                    | 0                                       | 0          | 1                                          | 0.398         | 0(0-Inf)                 |
| ASTIGMATISM, MYOPIC                                             | 12                                      | 87.6839    | 690                                        | 206.1454      | 0.4253(0.2402-0.7532)    |
| ASTIGMATISM, MYOPIC, COMPOUND                                   | 0                                       | 0          | 54                                         | 19.6672       | 0(0-Inf)                 |
| ASTIGMATISM, MYOPIC, SIMPLE                                     | 0                                       | 0          | 1                                          | 0.2354        | 0(0-Inf)                 |
| ASTIGMATISM, NOS                                                | 33                                      | 248.6296   | 1277                                       | 399.975       | 0.6216(0.4397-0.8788)    |
| ASTIGMATISM, REGULAR                                            | 0                                       | 0          | 1                                          | 0.2354        | 0(0-Inf)                 |
| ASTROCYTOMA, FIBRILLARY, CODE ALSO NEOPLASM MALIGNANT BY SITE   | 0                                       | 0          | 9                                          | 2.818         | 0(0-Inf)                 |
| ASTROCYTOMA, NOS, CODE ALSO NEOPLASM, MALIGNANT BY SITE         | 0                                       | 0          | 10                                         | 3.0447        | 0(0-Inf)                 |
| ASTROCYTOMA, NOS, GRADE 2, CODE ALSO NEOPLASM MALIGNANT BY SITE | 0                                       | 0          | 1                                          | 0.2729        | 0(0-Inf)                 |
| ASTROCYTOMA, NOS, GRADE 4, CODE ALSO NEOPLASM MALIGNANT BY SITE | 0                                       | 0          | 14                                         | 4.8655        | 0(0-Inf)                 |
| ASYMMETRY, BREAST                                               | 1                                       | 7.1656     | 34                                         | 7.608         | 0.9418(0.1282-6.9193)    |
| ASYMMETRY, CHEST                                                | 0                                       | 0          | 6                                          | 1.5023        | 0(0-Inf)                 |
| ASYMMETRY, CUPS (OPTIC) (DISC)                                  | 6                                       | 54.2907    | 140                                        | 59.6818       | 0.9097(0.4009-2.0639)    |
| ASYMMETRY, FACE                                                 | 1                                       | 6.9621     | 10                                         | 2.3392        | 2.9763(0.3747-23.6413)   |
| ASYMMETRY, JAW                                                  | 1                                       | 12.659     | 4                                          | 1.2247        | 10.3363(1.1241-95.0431)  |
| ASYMMETRY, OCULAR PRESSURE                                      | 0                                       | 0          | 2                                          | 0.7053        | 0(0-Inf)                 |
| ASYMMETRY, SHOULDER                                             | 0                                       | 0          | 2                                          | 1.1972        | 0(0-Inf)                 |
| ASYSTOLE                                                        | 2                                       | 22.2       | 28                                         | 16.5655       | 1.3401(0.3176-5.6549)    |
| AT RISK FOR DEVELOPMENT DISEASE/CONDITION NEC/NOS               | 19                                      | 167.5476   | 643                                        | 265.817       | 0.6303(0.399-0.9956)     |
| ATAXIA, CEREBELLAR                                              | 6                                       | 64.71      | 54                                         | 29.6008       | 2.1861(0.9367-5.1021)    |
| ATAXIA, CEREBRAL                                                | 0                                       | 0          | 4                                          | 1.0301        | 0(0-Inf)                 |
| ATAXIA, GAIT                                                    | 13                                      | 177.4073   | 149                                        | 115.474       | 1.5363(0.8699-2.7132)    |
| ATAXIA, NOS                                                     | 23                                      | 292.0007   | 275                                        | 187.257       | 1.5594(1.0176-2.3895)    |
| ATAXIA, OCULAR                                                  | 1                                       | 7.0179     | 1                                          | 0.265         | 26.4854(1.5939-440.0926) |
| ATAXIA, SPINOCEREBELLAR, NOS                                    | 0                                       | 0          | 3                                          | 0.9608        | 0(0-Inf)                 |
| ATELECTASIS, MIDDLE EAR                                         | 0                                       | 0          | 4                                          | 1.4115        | 0(0-Inf)                 |
| ATELECTASIS, NOS                                                | 4                                       | 32.4887    | 93                                         | 33.467        | 0.9708(0.3558-2.6487)    |
| ATELECTASIS, TYMPANIC MEMBRANE                                  | 1                                       | 8.2697     | 5                                          | 1.8588        | 4.4489(0.5089-38.8907)   |

| Description                                       | No. of Positive Cases with Disease Code | Case Rate* | No. of Positive Controls with Disease Code | Control Rate* | Relative Risk (95%CI)    |
|---------------------------------------------------|-----------------------------------------|------------|--------------------------------------------|---------------|--------------------------|
| ATELECTASIS, TYMPANUM                             | 0                                       | 0          | 1                                          | 0.4048        | 0(0-Inf)                 |
| ATHEROMA, AORTA, SEE ALSO ARTERIOSCLEROSIS        | 1                                       | 8.9602     | 4                                          | 1.7427        | 5.1416(0.5597-47.229)    |
| ATHEROMA, NOS, SEE ALSO ARTERIOSCLEROSIS          | 0                                       | 0          | 5                                          | 2.3429        | 0(0-Inf)                 |
| ATHEROMA, RENAL ARTERY                            | 0                                       | 0          | 2                                          | 1.7755        | 0(0-Inf)                 |
| ATHEROMA, TEMPORAL ARTERY                         | 0                                       | 0          | 2                                          | 0.8098        | 0(0-Inf)                 |
| ATHEROSCLEROSIS, AORTA, SEE ALSO ARTERIOSCLEROSIS | 0                                       | 0          | 33                                         | 13.1052       | 0(0-Inf)                 |
| ATHEROSCLEROSIS, BRAIN                            | 0                                       | 0          | 5                                          | 3.1265        | 0(0-Inf)                 |
| ATHEROSCLEROSIS, HEART                            | 0                                       | 0          | 12                                         | 5.822         | 0(0-Inf)                 |
| ATHEROSCLEROSIS, NOS, SEE ALSO ARTERIOSCLEROSIS   | 8                                       | 76.9967    | 162                                        | 75.9533       | 1.0137(0.4975-2.0657)    |
| ATHEROSCLEROSIS, SUBCLAVIAN ARTERY                | 0                                       | 0          | 4                                          | 1.3731        | 0(0-Inf)                 |
| ATHEROSCLEROSIS, TEMPORAL ARTERY                  | 0                                       | 0          | 1                                          | 2.4855        | 0(0-Inf)                 |
| ATHETOSIS, NOS                                    | 1                                       | 13.9947    | 1                                          | 0.8067        | 17.3487(1.0494-286.8165) |
| ATHLETE'S, FOOT                                   | 2                                       | 15.3292    | 25                                         | 8.5008        | 1.8033(0.4246-7.6576)    |
| ATHLETE'S, HEART                                  | 0                                       | 0          | 1                                          | 1.0366        | 0(0-Inf)                 |
| ATONIA, BLADDER                                   | 2                                       | 24.1264    | 40                                         | 26.0355       | 0.9267(0.2233-3.846)     |
| ATONIA, BOWEL                                     | 0                                       | 0          | 1                                          | 0.2354        | 0(0-Inf)                 |
| ATONIA, COLON                                     | 0                                       | 0          | 5                                          | 1.3908        | 0(0-Inf)                 |
| ATONIA, STOMACH                                   | 0                                       | 0          | 4                                          | 0.9708        | 0(0-Inf)                 |
| ATOPY, SEE ALSO HYPERSENSITIVITY                  | 0                                       | 0          | 6                                          | 1.6037        | 0(0-Inf)                 |
| ATRESIA, EAR, CONGENITAL                          | 0                                       | 0          | 1                                          | 0.3526        | 0(0-Inf)                 |
| ATROPHIE BLANCHE                                  | 0                                       | 0          | 2                                          | 0.5908        | 0(0-Inf)                 |
| ATROPHY, ALVEOLAR                                 | 1                                       | 7.3066     | 33                                         | 7.6188        | 0.959(0.1305-7.0498)     |
| ATROPHY, ARM                                      | 0                                       | 0          | 3                                          | 0.741         | 0(0-Inf)                 |
| ATROPHY, BLADDER                                  | 0                                       | 0          | 5                                          | 1.2711        | 0(0-Inf)                 |
| ATROPHY, BLANCHE                                  | 0                                       | 0          | 2                                          | 0.5709        | 0(0-Inf)                 |
| ATROPHY, BRAIN                                    | 2                                       | 22.6759    | 48                                         | 28.7003       | 0.7901(0.1915-3.2601)    |
| ATROPHY, BRAIN, CONGENITAL                        | 0                                       | 0          | 1                                          | 0.4048        | 0(0-Inf)                 |
| ATROPHY, BRAIN, NOS                               | 0                                       | 0          | 2                                          | 0.8097        | 0(0-Inf)                 |
| ATROPHY, BRAIN, SENILE                            | 0                                       | 0          | 1                                          | 1.9069        | 0(0-Inf)                 |
| ATROPHY, BREAST                                   | 0                                       | 0          | 5                                          | 1.0845        | 0(0-Inf)                 |
| ATROPHY, BUCCAL CAVITY                            | 0                                       | 0          | 1                                          | 0.853         | 0(0-Inf)                 |
| ATROPHY, CARTILAGE                                | 0                                       | 0          | 1                                          | 0.2354        | 0(0-Inf)                 |
| ATROPHY, CENTRAL NERVOUS SYSTEM, NOS              | 0                                       | 0          | 1                                          | 0.2729        | 0(0-Inf)                 |
| ATROPHY, CERVIX                                   | 1                                       | 14.1135    | 99                                         | 53.2683       | 0.265(0.0369-1.9029)     |
| ATROPHY, CHOROID                                  | 1                                       | 6.9242     | 11                                         | 2.8573        | 2.4233(0.309-19.0038)    |
| ATROPHY, CHOROID, CENTRAL, TOTAL                  | 0                                       | 0          | 2                                          | 1.7078        | 0(0-Inf)                 |
| ATROPHY, CORNEA MACULAR, NOS                      | 1                                       | 13.6616    | 9                                          | 7.382         | 1.8507(0.2325-14.7312)   |
| ATROPHY, CORTICAL (BRAIN)                         | 0                                       | 0          | 1                                          | 0.2354        | 0(0-Inf)                 |
| ATROPHY, DISUSE, MUSCLE                           | 0                                       | 0          | 29                                         | 9.1997        | 0(0-Inf)                 |
| ATROPHY, EAR                                      | 0                                       | 0          | 1                                          | 0.3527        | 0(0-Inf)                 |

| Description                                     | No. of Positive Cases with Disease Code | Case Rate* | No. of Positive Controls with Disease Code | Control Rate* | Relative Risk (95%CI)  |
|-------------------------------------------------|-----------------------------------------|------------|--------------------------------------------|---------------|------------------------|
| ATROPHY, ENDOMETRIUM                            | 15                                      | 214.9797   | 438                                        | 202.3661      | 1.0623(0.6339-1.7805)  |
| ATROPHY, ENDOMETRIUM, CYSTIC                    | 7                                       | 103.0057   | 71                                         | 40.5806       | 2.5383(1.1608-5.5504)  |
| ATROPHY, EYEBALL                                | 0                                       | 0          | 6                                          | 3.1071        | 0(0-Inf)               |
| ATROPHY, FALLOPIAN TUBE                         | 1                                       | 13.8227    | 13                                         | 6.3456        | 2.1783(0.2811-16.8823) |
| ATROPHY, FASCIA                                 | 0                                       | 0          | 1                                          | 0.8529        | 0(0-Inf)               |
| ATROPHY, GASTRIC                                | 0                                       | 0          | 54                                         | 37.6994       | 0(0-Inf)               |
| ATROPHY, GENITAL ORGAN, FEMALE                  | 2                                       | 28.2341    | 95                                         | 50.9668       | 0.554(0.1362-2.2537)   |
| ATROPHY, GENITAL ORGAN, MALE                    | 0                                       | 0          | 2                                          | 0.4854        | 0(0-Inf)               |
| ATROPHY, GEOGRAPHIC (EYE)(MACULA)               | 2                                       | 31.5407    | 45                                         | 43.7586       | 0.7208(0.1745-2.9777)  |
| ATROPHY, GUM                                    | 0                                       | 0          | 1                                          | 0.4048        | 0(0-Inf)               |
| ATROPHY, INSULIN                                | 0                                       | 0          | 2                                          | 0.5069        | 0(0-Inf)               |
| ATROPHY, INTESTINE                              | 1                                       | 7.6996     | 27                                         | 8.8239        | 0.8726(0.1179-6.4572)  |
| ATROPHY, IRIS                                   | 0                                       | 0          | 4                                          | 1.17          | 0(0-Inf)               |
| ATROPHY, JAW                                    | 5                                       | 38.1639    | 57                                         | 13.0349       | 2.9278(1.1661-7.3513)  |
| ATROPHY, KIDNEY                                 | 4                                       | 33.9381    | 48                                         | 18.6278       | 1.8219(0.6538-5.0772)  |
| ATROPHY, KIDNEY, HYDRONEPHROTIC                 | 0                                       | 0          | 1                                          | 0.3526        | 0(0-Inf)               |
| ATROPHY, KIDNEY, WITH HYPERTENSION              | 0                                       | 0          | 1                                          | 0.3526        | 0(0-Inf)               |
| ATROPHY, LARYNX                                 | 0                                       | 0          | 2                                          | 1.7763        | 0(0-Inf)               |
| ATROPHY, LEG                                    | 0                                       | 0          | 14                                         | 3.5587        | 0(0-Inf)               |
| ATROPHY, LIVER, NOS, SEE ALSO NECROSIS, HEPATIC | 0                                       | 0          | 1                                          | 0.4048        | 0(0-Inf)               |
| ATROPHY, LYMPH GLAND/GLANDULAR                  | 0                                       | 0          | 1                                          | 0.234         | 0(0-Inf)               |
| ATROPHY, MACULAR (SKIN#)                        | 0                                       | 0          | 1                                          | 6.4856        | 0(0-Inf)               |
| ATROPHY, MANDIBLE                               | 1                                       | 7.7965     | 41                                         | 13.7149       | 0.5685(0.0779-4.1481)  |
| ATROPHY, MAXILLA                                | 0                                       | 0          | 25                                         | 7.8891        | 0(0-Inf)               |
| ATROPHY, MULTIPLE SYSTEM (CNS)                  | 1                                       | 12.5141    | 15                                         | 10.2824       | 1.217(0.1599-9.2657)   |
| ATROPHY, MUSCULAR, DISUSE                       | 0                                       | 0          | 6                                          | 1.3707        | 0(0-Inf)               |
| ATROPHY, MUSCULAR, EXTREMITY                    | 4                                       | 31.0486    | 59                                         | 19.6254       | 1.5821(0.5722-4.3743)  |
| ATROPHY, MUSCULAR, NOS                          | 2                                       | 14.8662    | 29                                         | 9.048         | 1.643(0.3896-6.9289)   |
| ATROPHY, MUSCULAR, PERONEAL                     | 0                                       | 0          | 2                                          | 0.5069        | 0(0-Inf)               |
| ATROPHY, MUSCULAR, PROGRESSIVE                  | 0                                       | 0          | 1                                          | 0.398         | 0(0-Inf)               |
| ATROPHY, MUSCULAR, SPINAL                       | 0                                       | 0          | 3                                          | 1.1479        | 0(0-Inf)               |
| ATROPHY, NAIL                                   | 0                                       | 0          | 1                                          | 0.2354        | 0(0-Inf)               |
| ATROPHY, NASOPHARYNX                            | 0                                       | 0          | 1                                          | 0.2355        | 0(0-Inf)               |
| ATROPHY, NERVE, NEC/NOS                         | 0                                       | 0          | 2                                          | 0.4708        | 0(0-Inf)               |
| ATROPHY, NERVE, OPTIC, NOS                      | 3                                       | 21.4384    | 54                                         | 15.3136       | 1.4(0.4357-4.4982)     |
| ATROPHY, NERVE, OPTIC, TRAUMATIC                | 0                                       | 0          | 2                                          | 0.4681        | 0(0-Inf)               |
| ATROPHY, NEUROGENIC, NOS                        | 0                                       | 0          | 3                                          | 0.9284        | 0(0-Inf)               |
| ATROPHY, OLIVOPONTocerebellar                   | 0                                       | 0          | 1                                          | 0.2729        | 0(0-Inf)               |
| ATROPHY, OPTIC DISC, GLAUCOMATOUS               | 0                                       | 0          | 1                                          | 0.4048        | 0(0-Inf)               |
| ATROPHY, OPTIC PARTIAL                          | 0                                       | 0          | 1                                          | 0.4051        | 0(0-Inf)               |

| Description                                                | No. of Positive Cases with Disease Code | Case Rate* | No. of Positive Controls with Disease Code | Control Rate* | Relative Risk (95%CI)   |
|------------------------------------------------------------|-----------------------------------------|------------|--------------------------------------------|---------------|-------------------------|
| ATROPHY, OVARY                                             | 4                                       | 55.6991    | 161                                        | 75.0517       | 0.7421(0.2745-2.0064)   |
| ATROPHY, PANCREAS                                          | 0                                       | 0          | 6                                          | 2.0979        | 0(0-Inf)                |
| ATROPHY, PAPILLARY MUSCLE                                  | 0                                       | 0          | 1                                          | 0.8877        | 0(0-Inf)                |
| ATROPHY, PROSTATE                                          | 3                                       | 47.9547    | 114                                        | 84.8365       | 0.5653(0.1794-1.7814)   |
| ATROPHY, RENAL, SEE ALSO ATROPHY, KIDNEY                   | 0                                       | 0          | 8                                          | 2.3591        | 0(0-Inf)                |
| ATROPHY, RETINA                                            | 0                                       | 0          | 31                                         | 13.6688       | 0(0-Inf)                |
| ATROPHY, SKIN                                              | 2                                       | 15.3261    | 44                                         | 14.2447       | 1.0759(0.2596-4.4596)   |
| ATROPHY, SPINE (CORD)                                      | 0                                       | 0          | 2                                          | 0.7896        | 0(0-Inf)                |
| ATROPHY, STOMACH                                           | 5                                       | 46.0018    | 113                                        | 49.6843       | 0.9259(0.3772-2.2728)   |
| ATROPHY, STRIATE                                           | 0                                       | 0          | 1                                          | 0.398         | 0(0-Inf)                |
| ATROPHY, SUBCUTANEOUS, DUE TO INJECTION                    | 0                                       | 0          | 1                                          | 0.8274        | 0(0-Inf)                |
| ATROPHY, SUBCUTANEOUS, FAT                                 | 3                                       | 27.1656    | 29                                         | 12.5241       | 2.1691(0.656-7.1724)    |
| ATROPHY, SUBMANDIBULAR GLAND                               | 0                                       | 0          | 1                                          | 0.2354        | 0(0-Inf)                |
| ATROPHY, TESTICULAR                                        | 1                                       | 13.8176    | 76                                         | 41.0022       | 0.337(0.0468-2.4267)    |
| ATROPHY, TESTICULAR, BILATERAL                             | 0                                       | 0          | 4                                          | 1.59          | 0(0-Inf)                |
| ATROPHY, THYMUS                                            | 0                                       | 0          | 1                                          | 0.2354        | 0(0-Inf)                |
| ATROPHY, THYROID                                           | 0                                       | 0          | 1                                          | 0.4049        | 0(0-Inf)                |
| ATROPHY, TONGUE                                            | 0                                       | 0          | 1                                          | 0.4048        | 0(0-Inf)                |
| ATROPHY, TONGUE, PAPILLAE                                  | 0                                       | 0          | 1                                          | 0.8877        | 0(0-Inf)                |
| ATROPHY, TURBINATE (NOSE)                                  | 0                                       | 0          | 3                                          | 2.8251        | 0(0-Inf)                |
| ATROPHY, UTERUS                                            | 1                                       | 13.7935    | 15                                         | 7.1303        | 1.9345(0.2524-14.8276)  |
| ATROPHY, UTERUS (SENILE)                                   | 1                                       | 7.7828     | 0                                          | 0             | 17355463196.1257(0-Inf) |
| ATROPHY, VAGINA                                            | 6                                       | 84.1438    | 194                                        | 99.736        | 0.8437(0.3735-1.9057)   |
| ATROPHY, VAGINAL (SENILE)                                  | 0                                       | 0          | 6                                          | 1.5047        | 0(0-Inf)                |
| ATROPHY, VAGINAL MUCOSA                                    | 0                                       | 0          | 18                                         | 8.3416        | 0(0-Inf)                |
| ATROPHY, VASCULAR                                          | 0                                       | 0          | 3                                          | 1.1478        | 0(0-Inf)                |
| ATROPHY, VULVAR                                            | 4                                       | 57.072     | 69                                         | 37.1482       | 1.5363(0.5578-4.2312)   |
| ATTACK, DROP                                               | 1                                       | 10.9897    | 11                                         | 6.454         | 1.7028(0.2178-13.3109)  |
| ATTACK, NOS, SEE ALSO EPILEPSY, CONVULSION, SEIZURE        | 0                                       | 0          | 2                                          | 1.0782        | 0(0-Inf)                |
| ATTACK, STOKES ADAMS                                       | 0                                       | 0          | 1                                          | 1.9062        | 0(0-Inf)                |
| ATTACK, TRANSIENT ISCHEMIC--TIA                            | 38                                      | 415.184    | 815                                        | 452.0813      | 0.9184(0.6628-1.2725)   |
| ATTACK, TRANSIENT, ISCHEMIC, CAROTID                       | 1                                       | 8.8631     | 30                                         | 12.4745       | 0.7105(0.0965-5.2321)   |
| ATTACK, TRANSIENT, ISCHEMIC, OLD                           | 28                                      | 323.5153   | 466                                        | 280.9733      | 1.1514(0.7855-1.6879)   |
| ATTACK, TRANSIENT, ISCHEMIC, VERTEBRAL-BASILAR SYSTEM      | 7                                       | 64.2486    | 71                                         | 30.8846       | 2.0803(0.9534-4.5391)   |
| ATTACK, TRANSIENT, ISCHEMIC, WITH NEUROLOGIC DEFICIT--RIND | 1                                       | 8.8442     | 27                                         | 11.2142       | 0.7887(0.1067-5.8311)   |
| ATTACK, VASOVAGAL                                          | 0                                       | 0          | 13                                         | 3.3221        | 0(0-Inf)                |
| ATTENUATION, LIGAMENT, NOS                                 | 0                                       | 0          | 5                                          | 1.1873        | 0(0-Inf)                |
| ATTRITION, TOOTH                                           | 1                                       | 7.3431     | 20                                         | 6.0275        | 1.2183(0.1623-9.1424)   |
| ATYPIA, ABDOMINAL FLUID                                    | 0                                       | 0          | 1                                          | 0.3526        | 0(0-Inf)                |

| Description                       | No. of Positive Cases with Disease Code | Case Rate* | No. of Positive Controls with Disease Code | Control Rate* | Relative Risk (95%CI)    |
|-----------------------------------|-----------------------------------------|------------|--------------------------------------------|---------------|--------------------------|
| ATYPIA, BLADDER                   | 1                                       | 9.3058     | 21                                         | 9.4797        | 0.9817(0.1314-7.3354)    |
| ATYPIA, BONE MARROW               | 0                                       | 0          | 2                                          | 0.7896        | 0(0-Inf)                 |
| ATYPIA, BRAIN                     | 0                                       | 0          | 2                                          | 0.6774        | 0(0-Inf)                 |
| ATYPIA, BREAST (CYTOLOGY)         | 1                                       | 13.7903    | 38                                         | 18.3106       | 0.7531(0.1029-5.5137)    |
| ATYPIA, BRONCHUS                  | 0                                       | 0          | 12                                         | 7.4674        | 0(0-Inf)                 |
| ATYPIA, CERVICAL                  | 2                                       | 14.969     | 290                                        | 63.5049       | 0.2357(0.0586-0.9479)    |
| ATYPIA, CNS, NEC                  | 0                                       | 0          | 1                                          | 0.2354        | 0(0-Inf)                 |
| ATYPIA, COLON                     | 2                                       | 14.9011    | 22                                         | 6.8618        | 2.1716(0.5065-9.311)     |
| ATYPIA, ENDOCERVIX (CELLS)        | 0                                       | 0          | 121                                        | 52.5754       | 0(0-Inf)                 |
| ATYPIA, ENDOMETRIUM               | 1                                       | 13.8402    | 47                                         | 21.5524       | 0.6422(0.0882-4.6739)    |
| ATYPIA, ESOPHAGUS                 | 2                                       | 15.7428    | 29                                         | 9.9443        | 1.5831(0.3754-6.6757)    |
| ATYPIA, EYE                       | 0                                       | 0          | 3                                          | 2.6669        | 0(0-Inf)                 |
| ATYPIA, GASTROINTESTINAL NEC      | 1                                       | 7.2981     | 5                                          | 1.4897        | 4.8989(0.5591-42.9276)   |
| ATYPIA, GENITOURINARY NEC         | 0                                       | 0          | 5                                          | 1.5553        | 0(0-Inf)                 |
| ATYPIA, HEAD AND NECK NEC         | 0                                       | 0          | 1                                          | 0.8877        | 0(0-Inf)                 |
| ATYPIA, KIDNEY                    | 0                                       | 0          | 1                                          | 0.8877        | 0(0-Inf)                 |
| ATYPIA, LABIA                     | 0                                       | 0          | 3                                          | 0.7063        | 0(0-Inf)                 |
| ATYPIA, LARYNX (EPIGLOTTIS)       | 0                                       | 0          | 3                                          | 2.6647        | 0(0-Inf)                 |
| ATYPIA, LUNG                      | 0                                       | 0          | 3                                          | 1.0577        | 0(0-Inf)                 |
| ATYPIA, NASAL                     | 1                                       | 14.2012    | 1                                          | 0.8127        | 17.4736(1.0597-288.1356) |
| ATYPIA, ORAL CAVITY (MOUTH) (LIP) | 0                                       | 0          | 13                                         | 6.1418        | 0(0-Inf)                 |
| ATYPIA, PANCREAS                  | 0                                       | 0          | 1                                          | 0.2354        | 0(0-Inf)                 |
| ATYPIA, PERICARDIUM               | 0                                       | 0          | 1                                          | 0.234         | 0(0-Inf)                 |
| ATYPIA, PLEURA                    | 0                                       | 0          | 15                                         | 5.4497        | 0(0-Inf)                 |
| ATYPIA, PROSTATE                  | 3                                       | 46.5089    | 74                                         | 52.4771       | 0.8863(0.2788-2.8175)    |
| ATYPIA, RECTUM                    | 0                                       | 0          | 4                                          | 0.9708        | 0(0-Inf)                 |
| ATYPIA, SKIN                      | 5                                       | 39.4862    | 193                                        | 67.3283       | 0.5865(0.241-1.4272)     |
| ATYPIA, SKIN, MELANOCYTIC         | 2                                       | 13.8709    | 65                                         | 16.5943       | 0.8359(0.204-3.4245)     |
| ATYPIA, SPUTUM                    | 1                                       | 8.3994     | 14                                         | 5.3661        | 1.5653(0.2041-12.0067)   |
| ATYPIA, STOMACH (GASTRIC)         | 0                                       | 0          | 6                                          | 4.8025        | 0(0-Inf)                 |
| ATYPIA, SUBCUTANEOUS NEC          | 0                                       | 0          | 1                                          | 0.234         | 0(0-Inf)                 |
| ATYPIA, THYROID (HURTHLE CELL)    | 0                                       | 0          | 5                                          | 1.2018        | 0(0-Inf)                 |
| ATYPIA, TONGUE                    | 0                                       | 0          | 5                                          | 1.7679        | 0(0-Inf)                 |
| ATYPIA, URETER                    | 0                                       | 0          | 3                                          | 0.8018        | 0(0-Inf)                 |
| ATYPIA, URINE CYTOLOGY            | 7                                       | 81.8571    | 108                                        | 66.2683       | 1.2352(0.574-2.6581)     |
| ATYPIA, UROTHELIAL                | 4                                       | 46.3422    | 67                                         | 40.8883       | 1.1334(0.4122-3.116)     |
| ATYPIA, VAGINA (INTROITUS)        | 3                                       | 41.86      | 28                                         | 12.6332       | 3.3135(0.9964-11.0184)   |
| ATYPIA, VOCAL CORD                | 1                                       | 6.9473     | 6                                          | 1.7344        | 4.0055(0.4754-33.7464)   |
| ATYPIA, VULVA                     | 0                                       | 0          | 6                                          | 1.492         | 0(0-Inf)                 |
| AUTOMATISM, NOS                   | 0                                       | 0          | 1                                          | 0.234         | 0(0-Inf)                 |

| Description                                                                            | No. of Positive Cases with Disease Code | Case Rate* | No. of Positive Controls with Disease Code | Control Rate* | Relative Risk (95%CI)  |
|----------------------------------------------------------------------------------------|-----------------------------------------|------------|--------------------------------------------|---------------|------------------------|
| AUTONOMIC, DISORDER, NOS, SEE ALSO IMBALANCE, NEUROPATHY, PARALYSIS                    | 0                                       | 0          | 4                                          | 3.7973        | 0(0-Inf)               |
| AUTO-SENSITIZATION                                                                     | 0                                       | 0          | 2                                          | 0.4854        | 0(0-Inf)               |
| AVITAMINOSIS, A                                                                        | 0                                       | 0          | 1                                          | 0.2354        | 0(0-Inf)               |
| AVITAMINOSIS, D, NOS                                                                   | 0                                       | 0          | 6                                          | 1.9549        | 0(0-Inf)               |
| AVULSION, FINGERNAIL                                                                   | 2                                       | 16.3001    | 17                                         | 6.1878        | 2.6342(0.6028-11.5114) |
| AVULSION, LOWER EXTREMITY, SEE ALSO WOUND, OPEN BY SITE                                | 0                                       | 0          | 6                                          | 1.7426        | 0(0-Inf)               |
| AVULSION, NOS, SEE ALSO WOUND/INJURY TYPE SPECIFIED (MUSCLE/TENDON/ETC SEE RUPTURE #S) | 1                                       | 7.8889     | 7                                          | 2.4123        | 3.2703(0.3956-27.033)  |
| AVULSION, TOENAIL                                                                      | 3                                       | 35.3233    | 68                                         | 43.153        | 0.8186(0.2569-2.6078)  |
| AVULSION, UPPER EXTREMITY, SEE ALSO WOUND, OPEN BY SITE                                | 1                                       | 7.7577     | 6                                          | 1.5742        | 4.928(0.583-41.6522)   |
| AWARENESS CARDIAC                                                                      | 1                                       | 7.2201     | 11                                         | 3.1358        | 2.3025(0.2932-18.0831) |
| AZOOSPERMIA                                                                            | 1                                       | 15.7029    | 9                                          | 3.7885        | 4.1448(0.5201-33.0332) |
| AZOTEMIA, CHRONIC                                                                      | 0                                       | 0          | 3                                          | 1.3868        | 0(0-Inf)               |
| AZOTEMIA, NOS                                                                          | 12                                      | 153.5546   | 122                                        | 86.5585       | 1.774(0.9781-3.2174)   |
| BACILLURIA (SEE ALSO INFECTION URINARY)                                                | 2                                       | 17.5666    | 19                                         | 4.3209        | 4.0655(0.9357-17.6647) |
| BACKACHE (SEE ALSO PAIN BACK)                                                          | 3                                       | 21.378     | 65                                         | 15.24         | 1.4028(0.4389-4.4834)  |
| BACTEREMIA, AEROBACTER AEROGENES                                                       | 0                                       | 0          | 1                                          | 0.3526        | 0(0-Inf)               |
| BACTEREMIA, BACTERIAL, NOS                                                             | 0                                       | 0          | 1                                          | 0.3526        | 0(0-Inf)               |
| BACTEREMIA, ESCHERICHIA COLI                                                           | 3                                       | 29.3192    | 54                                         | 26.0284       | 1.1264(0.351-3.6153)   |
| BACTEREMIA, GRAM-NEGATIVE BACILLI, NEC                                                 | 2                                       | 23.71      | 16                                         | 10.2255       | 2.3187(0.5291-10.162)  |
| BACTEREMIA, HEMOPHILUS (H.) INFLUENZAE                                                 | 0                                       | 0          | 3                                          | 2.048         | 0(0-Inf)               |
| BACTEREMIA, NOS, SEE ALSO SEPTICEMIA                                                   | 4                                       | 49.256     | 131                                        | 88.3984       | 0.5572(0.2057-1.509)   |
| BACTEREMIA, PNEUMOCOCCAL                                                               | 1                                       | 8.0847     | 4                                          | 1.4448        | 5.5957(0.6104-51.295)  |
| BACTEREMIA, PROTEUS VULGARIS                                                           | 0                                       | 0          | 1                                          | 1.908         | 0(0-Inf)               |
| BACTEREMIA, PSEUDOMONAS AERUGINOSA                                                     | 0                                       | 0          | 7                                          | 3.9646        | 0(0-Inf)               |
| BACTEREMIA, STAPHYLOCOCCAL                                                             | 3                                       | 30.1453    | 47                                         | 23.6208       | 1.2762(0.3957-4.1164)  |
| BACTEREMIA, STREPTOCOCCAL                                                              | 5                                       | 82.9511    | 36                                         | 35.352        | 2.3464(0.9178-5.9989)  |
| BACTERIURIA (SEE ALSO INFECTION URINARY)                                               | 13                                      | 107.2848   | 321                                        | 116.8992      | 0.9178(0.5263-1.6005)  |
| BAD BREATH                                                                             | 1                                       | 8.85       | 3                                          | 1.2601        | 7.0232(0.7124-69.2386) |
| BAD ODOR/ODORIFEROUS (EXCLUDES POOR HYGIENE OR SWEATING DISORDER)                      | 1                                       | 8.3548     | 14                                         | 5.3024        | 1.5756(0.2052-12.1011) |
| BAD TASTE IN MOUTH                                                                     | 1                                       | 8.231      | 11                                         | 4.0498        | 2.0324(0.2593-15.9312) |
| BALANITIS, NOS                                                                         | 14                                      | 218.9576   | 280                                        | 199.9355      | 1.0951(0.6395-1.8756)  |
| BALANITIS, XEROTICA OBLITERANS                                                         | 1                                       | 14.9005    | 24                                         | 15.9042       | 0.9369(0.1262-6.9534)  |
| BALANOPOSTHITIS                                                                        | 2                                       | 27.7971    | 23                                         | 13.2688       | 2.0949(0.4911-8.9369)  |
| BALDNESS (SEE ALSO ALOPECIA)                                                           | 2                                       | 14.5159    | 52                                         | 12.6203       | 1.1502(0.279-4.7421)   |
| BAND, ILIOTIBIAL                                                                       | 0                                       | 0          | 24                                         | 10.36         | 0(0-Inf)               |
| BAND, INTESTINE                                                                        | 0                                       | 0          | 1                                          | 0.827         | 0(0-Inf)               |

| Description                                                      | No. of Positive Cases with Disease Code | Case Rate* | No. of Positive Controls with Disease Code | Control Rate* | Relative Risk (95%CI)   |
|------------------------------------------------------------------|-----------------------------------------|------------|--------------------------------------------|---------------|-------------------------|
| BAND, OBSTRUCTIVE, INTESTINE                                     | 0                                       | 0          | 2                                          | 1.1972        | 0(0-Inf)                |
| BAND, OMENTUM                                                    | 0                                       | 0          | 1                                          | 0.8529        | 0(0-Inf)                |
| BAND, TRACTION (EYE)                                             | 0                                       | 0          | 1                                          | 0.8528        | 0(0-Inf)                |
| BAND, VAGINA                                                     | 0                                       | 0          | 3                                          | 0.8118        | 0(0-Inf)                |
| BAR, CALCANEONAVICULAR                                           | 0                                       | 0          | 1                                          | 0.2729        | 0(0-Inf)                |
| BAROTITIS                                                        | 0                                       | 0          | 2                                          | 0.432         | 0(0-Inf)                |
| BAROTRAUMA, NOS                                                  | 2                                       | 17.3509    | 30                                         | 7.5631        | 2.2942(0.5443-9.6689)   |
| BAROTRAUMA, OTITIC                                               | 2                                       | 15.5598    | 23                                         | 5.4635        | 2.8479(0.665-12.1963)   |
| BAROTRAUMA, SINUS                                                | 0                                       | 0          | 1                                          | 0.398         | 0(0-Inf)                |
| BARTHOLINITIS                                                    | 0                                       | 0          | 8                                          | 2.0622        | 0(0-Inf)                |
| BASCULE (INTESTINE)                                              | 0                                       | 0          | 1                                          | 0.234         | 0(0-Inf)                |
| BASOPHILIA                                                       | 0                                       | 0          | 1                                          | 0.2354        | 0(0-Inf)                |
| BEAR TRACKS RETINA                                               | 1                                       | 14.8986    | 1                                          | 0.3477        | 42.8516(2.5546-718.819) |
| BEAU'S LINES                                                     | 0                                       | 0          | 2                                          | 0.6309        | 0(0-Inf)                |
| BEE STING                                                        | 6                                       | 42.0352    | 262                                        | 64.4762       | 0.652(0.2898-1.4668)    |
| BELCHING                                                         | 0                                       | 0          | 49                                         | 18.7679       | 0(0-Inf)                |
| BENIGN PROSTATE                                                  | 35                                      | 611.3512   | 690                                        | 564.2975      | 1.0834(0.7708-1.5227)   |
| BEZOAR, INTESTINE                                                | 0                                       | 0          | 1                                          | 0.234         | 0(0-Inf)                |
| BEZOAR, STOMACH                                                  | 0                                       | 0          | 2                                          | 0.4853        | 0(0-Inf)                |
| BICORNUATE UTERUS                                                | 0                                       | 0          | 6                                          | 1.4129        | 0(0-Inf)                |
| BICUSPID, AORTIC VALVE                                           | 3                                       | 20.9249    | 111                                        | 30.3501       | 0.6895(0.2186-2.1748)   |
| BIFID, KIDNEY                                                    | 0                                       | 0          | 1                                          | 0.2729        | 0(0-Inf)                |
| BIFID, UVULA                                                     | 0                                       | 0          | 1                                          | 0.2354        | 0(0-Inf)                |
| BIGEMINY                                                         | 1                                       | 7.6934     | 58                                         | 19.2167       | 0.4003(0.0553-2.8961)   |
| BILOMA                                                           | 0                                       | 0          | 1                                          | 0.2354        | 0(0-Inf)                |
| BIPARTITE, PATELLA, CONGENITAL                                   | 0                                       | 0          | 3                                          | 1.0582        | 0(0-Inf)                |
| BIRTHMARK SEE ALSO NEVUS                                         | 0                                       | 0          | 3                                          | 0.6548        | 0(0-Inf)                |
| BITE, ANIMAL, CODE ALSO WOUND, OPEN BY SITE                      | 27                                      | 197.3048   | 512                                        | 124.2561      | 1.5879(1.0766-2.3419)   |
| BITE, HUMAN, CODE ALSO WOUND, OPEN BY SITE                       | 0                                       | 0          | 19                                         | 6.1058        | 0(0-Inf)                |
| BITE, INSECT, CODE ALSO INJURY, SUPERFICIAL, BY SITE (IF STATED) | 31                                      | 223.2372   | 993                                        | 247.57        | 0.9017(0.6301-1.2904)   |
| BITE, SNAKE                                                      | 0                                       | 0          | 1                                          | 0.4751        | 0(0-Inf)                |
| BITING TONGUE (HABIT)                                            | 0                                       | 0          | 1                                          | 0.3526        | 0(0-Inf)                |
| BLACK TONGUE                                                     | 0                                       | 0          | 3                                          | 2.0939        | 0(0-Inf)                |
| BLACKHEAD                                                        | 0                                       | 0          | 4                                          | 1.1418        | 0(0-Inf)                |
| BLACKOUT (SPELLS)                                                | 0                                       | 0          | 8                                          | 3.54          | 0(0-Inf)                |
| BLANCHING (VASCULAR)                                             | 0                                       | 0          | 2                                          | 1.1614        | 0(0-Inf)                |
| BLASTOCYSTIS HOMINIS                                             | 1                                       | 7.1492     | 4                                          | 0.9451        | 7.5641(0.819-69.8602)   |
| BLASTOMA, BENIGN, CODE ALSO NEOPLASM, BENIGN BY SITE             | 0                                       | 0          | 1                                          | 0.2354        | 0(0-Inf)                |
| BLASTOMA, NOS, CODE ALSO NEOPLASM, NOS, BY SITE                  | 0                                       | 0          | 3                                          | 0.8018        | 0(0-Inf)                |



| Description                                     | No. of Positive Cases with Disease Code | Case Rate* | No. of Positive Controls with Disease Code | Control Rate* | Relative Risk (95%CI)  |
|-------------------------------------------------|-----------------------------------------|------------|--------------------------------------------|---------------|------------------------|
| BLASTOMYCOSIS, NOS                              | 0                                       | 0          | 2                                          | 0.5709        | 0(0-Inf)               |
| BLASTOMYCOSIS, PULMONARY                        | 0                                       | 0          | 2                                          | 0.6309        | 0(0-Inf)               |
| BLEB, EMPHYSEMATOUS                             | 0                                       | 0          | 1                                          | 0.2729        | 0(0-Inf)               |
| BLEB, EYE (CYSTIC) (NON-SURGICAL)               | 1                                       | 11.1499    | 13                                         | 7.5918        | 1.4687(0.1907-11.309)  |
| BLEB, FILTERING                                 | 5                                       | 49.3471    | 77                                         | 37.2639       | 1.3243(0.5343-3.282)   |
| BLEB, LUNG                                      | 0                                       | 0          | 9                                          | 2.2815        | 0(0-Inf)               |
| BLEB, NOS                                       | 0                                       | 0          | 8                                          | 2.0623        | 0(0-Inf)               |
| BLEEDING, ANAL                                  | 0                                       | 0          | 64                                         | 16.3293       | 0(0-Inf)               |
| BLEEDING, BREAKTHROUGH                          | 3                                       | 54.0087    | 75                                         | 34.0537       | 1.586(0.4981-5.0495)   |
| BLEEDING, DYSFUNCTIONAL UTERINE--DUB            | 0                                       | 0          | 147                                        | 40.3259       | 0(0-Inf)               |
| BLEEDING, EAR                                   | 1                                       | 9.0641     | 28                                         | 12.1035       | 0.7489(0.1014-5.5297)  |
| BLEEDING, ESOPHAGEAL                            | 1                                       | 9.9205     | 17                                         | 8.3942        | 1.1818(0.1563-8.9334)  |
| BLEEDING, FAMILIAL                              | 0                                       | 0          | 1                                          | 0.2354        | 0(0-Inf)               |
| BLEEDING, FIBROID (UTERUS)                      | 0                                       | 0          | 2                                          | 0.7961        | 0(0-Inf)               |
| BLEEDING, GASTROINTESTINAL, LOWER--BGIL         | 17                                      | 191.0249   | 315                                        | 185.4133      | 1.0303(0.6316-1.6806)  |
| BLEEDING, GASTROINTESTINAL, NOS--BGI            | 55                                      | 667.6547   | 879                                        | 566.9839      | 1.1776(0.896-1.5475)   |
| BLEEDING, GASTROINTESTINAL, UPPER--BGIU         | 21                                      | 229.6417   | 428                                        | 243.1143      | 0.9446(0.6088-1.4655)  |
| BLEEDING, GUMS                                  | 1                                       | 8.5113     | 8                                          | 3.1234        | 2.725(0.3355-22.1346)  |
| BLEEDING, HEMORRHOIDS                           | 3                                       | 24.7455    | 87                                         | 21.4779       | 1.1521(0.3633-3.6539)  |
| BLEEDING, INTERMENSTRUAL, SEE ALSO METRORRHAGIA | 0                                       | 0          | 39                                         | 32.8408       | 0(0-Inf)               |
| BLEEDING, MENOPAUSAL                            | 6                                       | 168.4209   | 169                                        | 97.6132       | 1.7254(0.7629-3.9023)  |
| BLEEDING, MOUTH                                 | 2                                       | 15.737     | 21                                         | 7.2364        | 2.1747(0.5058-9.3501)  |
| BLEEDING, NOS, SEE ALSO HEMORRHAGE              | 5                                       | 60.3598    | 70                                         | 46.3088       | 1.3034(0.5245-3.2389)  |
| BLEEDING, NOSE                                  | 6                                       | 55.1929    | 167                                        | 73.4765       | 0.7512(0.3321-1.699)   |
| BLEEDING, OVULATORY                             | 0                                       | 0          | 5                                          | 3.0659        | 0(0-Inf)               |
| BLEEDING, PERINEAL                              | 0                                       | 0          | 12                                         | 5.1864        | 0(0-Inf)               |
| BLEEDING, POST-COITAL                           | 1                                       | 13.6551    | 26                                         | 7.4853        | 1.8243(0.2463-13.5138) |
| BLEEDING, POSTMENOPAUSAL, HORMONE-INDUCED       | 7                                       | 99.8477    | 331                                        | 147.0844      | 0.6788(0.3206-1.4374)  |
| BLEEDING, POSTMENOPAUSAL, INDUCED, ESTROGEN     | 3                                       | 41.8505    | 90                                         | 40.9016       | 1.0232(0.3227-3.2444)  |
| BLEEDING, POSTMENOPAUSAL, NOS                   | 22                                      | 321.2769   | 1036                                       | 483.4206      | 0.6646(0.4353-1.0147)  |
| BLEEDING, POSTMENOPAUSAL, PERSISTENT            | 0                                       | 0          | 9                                          | 1.9994        | 0(0-Inf)               |
| BLEEDING, POSTMENOPAUSAL, RECURRENT             | 0                                       | 0          | 15                                         | 6.6738        | 0(0-Inf)               |
| BLEEDING, POSTOPERATIVE                         | 9                                       | 77.4312    | 199                                        | 78.3258       | 0.9886(0.506-1.9313)   |
| BLEEDING, PROSTATE                              | 2                                       | 48.8913    | 14                                         | 18.5387       | 2.6373(0.5955-11.6792) |
| BLEEDING, RECTAL                                | 42                                      | 318.582    | 1234                                       | 384.1799      | 0.8293(0.6092-1.1287)  |
| BLEEDING, UMBILICUS                             | 0                                       | 0          | 1                                          | 0.3526        | 0(0-Inf)               |
| BLEEDING, URETHRAL                              | 4                                       | 37.114     | 39                                         | 17.5754       | 2.1117(0.7511-5.9369)  |
| BLEEDING, WIPE                                  | 2                                       | 15.9159    | 26                                         | 9.0073        | 1.767(0.4163-7.5006)   |
| BLEPHARITIS, ALLERGIC                           | 0                                       | 0          | 33                                         | 7.6385        | 0(0-Inf)               |
| BLEPHARITIS, ANGULAR                            | 3                                       | 20.8598    | 51                                         | 12.5213       | 1.666(0.5171-5.3675)   |

| Description                                              | No. of Positive Cases with Disease Code | Case Rate* | No. of Positive Controls with Disease Code | Control Rate* | Relative Risk (95%CI)    |
|----------------------------------------------------------|-----------------------------------------|------------|--------------------------------------------|---------------|--------------------------|
| BLEPHARITIS, MARGINAL                                    | 1                                       | 6.9796     | 28                                         | 6.8099        | 1.0249(0.1387-7.5744)    |
| BLEPHARITIS, NOS                                         | 87                                      | 755.1956   | 1812                                       | 650.1364      | 1.1616(0.9361-1.4414)    |
| BLEPHARITIS, PHYSICAL, TRAUMA, CHEMICAL, ETC.            | 0                                       | 0          | 2                                          | 1.6548        | 0(0-Inf)                 |
| BLEPHARITIS, SQUAMOUS                                    | 0                                       | 0          | 1                                          | 0.398         | 0(0-Inf)                 |
| BLEPHAROCHALASIS                                         | 1                                       | 7.7641     | 124                                        | 28.2995       | 0.2744(0.0383-1.9661)    |
| BLEPHAROCONJUNCTIVITIS, NOS                              | 1                                       | 6.987      | 108                                        | 28.555        | 0.2447(0.0341-1.7555)    |
| BLEPHAROPHIMOSIS                                         | 0                                       | 0          | 1                                          | 0.4048        | 0(0-Inf)                 |
| BLEPHAROPTOSIS, NOS                                      | 3                                       | 23.9538    | 138                                        | 48.1445       | 0.4975(0.1582-1.5645)    |
| BLEPHAROSPASM                                            | 2                                       | 14.0812    | 40                                         | 10.691        | 1.3171(0.3165-5.4805)    |
| BLIND, ONE EYE/OTHER EYE NOS                             | 1                                       | 14.6562    | 11                                         | 9.3673        | 1.5646(0.2007-12.1976)   |
| BLINDNESS, BOTH EYES                                     | 0                                       | 0          | 2                                          | 2.5457        | 0(0-Inf)                 |
| BLINDNESS, BOTH EYES, SEVERITY NOT SPECIFICALLY DEFINED  | 0                                       | 0          | 1                                          | 0.2729        | 0(0-Inf)                 |
| BLINDNESS, COLOR                                         | 1                                       | 9.2977     | 17                                         | 5.0121        | 1.855(0.2453-14.0267)    |
| BLINDNESS, CONGENITAL                                    | 0                                       | 0          | 4                                          | 1.3219        | 0(0-Inf)                 |
| BLINDNESS, CORTICAL                                      | 0                                       | 0          | 4                                          | 3.7958        | 0(0-Inf)                 |
| BLINDNESS, HYSTERICAL                                    | 0                                       | 0          | 1                                          | 0.4049        | 0(0-Inf)                 |
| BLINDNESS, NIGHT                                         | 0                                       | 0          | 1                                          | 0.398         | 0(0-Inf)                 |
| BLINDNESS, NOS                                           | 4                                       | 48.3503    | 133                                        | 89.2628       | 0.5417(0.2-1.4667)       |
| BLINDNESS, ONE EYE (OD)(OS)                              | 3                                       | 27.9058    | 88                                         | 39.5515       | 0.7056(0.2227-2.235)     |
| BLINDNESS, ONE EYE NEAR TOTAL OTHER NOS                  | 0                                       | 0          | 1                                          | 0.2729        | 0(0-Inf)                 |
| BLINDNESS, ONE EYE, SEVERITY NOT SPECIFICALLY DEFINED    | 0                                       | 0          | 12                                         | 3.671         | 0(0-Inf)                 |
| BLINDNESS, ONE EYE, SPECIFICALLY DEFINED AS CORRECTABLE  | 0                                       | 0          | 3                                          | 0.7972        | 0(0-Inf)                 |
| BLINKING EYES SEE ALSO TIC OR SYMPTOMS                   | 0                                       | 0          | 2                                          | 0.8096        | 0(0-Inf)                 |
| BLISTER, BLOOD (NON-TRAUMATIC)                           | 1                                       | 9.1182     | 13                                         | 5.6474        | 1.6146(0.2093-12.4543)   |
| BLISTER, FEVER                                           | 0                                       | 0          | 4                                          | 1.142         | 0(0-Inf)                 |
| BLISTER, FRICTION, CODE ALSO INJURY, SUPERFICIAL BY SITE | 0                                       | 0          | 9                                          | 2.5134        | 0(0-Inf)                 |
| BLISTER, MULTIPLE, SKIN, NONTRAUMATIC                    | 1                                       | 9.9297     | 1                                          | 0.4941        | 20.0946(1.2012-336.1703) |
| BLISTER, NONTRAUMATIC                                    | 2                                       | 18.6986    | 24                                         | 10.84         | 1.725(0.4049-7.3482)     |
| BLISTER, NOS, CODE ALSO INJURY, SUPERFICIAL BY SITE      | 10                                      | 94.351     | 173                                        | 79.264        | 1.1903(0.6279-2.2566)    |
| BLOATING OF ABDOMEN                                      | 13                                      | 100.1772   | 261                                        | 84.9252       | 1.1796(0.6744-2.0631)    |
| BLOCK, ATRIOVENTRICULAR, COMPLETE                        | 1                                       | 11.5608    | 17                                         | 10.4926       | 1.1018(0.1458-8.3259)    |
| BLOCK, ATRIOVENTRICULAR, FIRST DEGREE                    | 4                                       | 42.2922    | 70                                         | 37.9262       | 1.1151(0.406-3.0631)     |
| BLOCK, ATRIOVENTRICULAR, HIGH DEGREE                     | 1                                       | 14.1327    | 32                                         | 26.1493       | 0.5405(0.0737-3.965)     |
| BLOCK, ATRIOVENTRICULAR, MOBITZ TYPE 1                   | 1                                       | 9.6016     | 17                                         | 8.0847        | 1.1876(0.1572-8.9732)    |
| BLOCK, ATRIOVENTRICULAR, MOBITZ TYPE 2                   | 1                                       | 9.7397     | 18                                         | 8.6469        | 1.1264(0.1494-8.4901)    |
| BLOCK, ATRIOVENTRICULAR, NOS                             | 3                                       | 40.1525    | 70                                         | 53.194        | 0.7548(0.2372-2.4024)    |
| BLOCK, ATRIOVENTRICULAR, SECOND DEGREE 2:1               | 2                                       | 24.0376    | 68                                         | 44.2237       | 0.5435(0.133-2.2222)     |
| BLOCK, ATRIOVENTRICULAR, THIRD DEGREE                    | 3                                       | 40.1752    | 65                                         | 49.1183       | 0.8179(0.2565-2.6083)    |
| BLOCK, BIFASCICULAR                                      | 1                                       | 11.1106    | 38                                         | 22.0999       | 0.5027(0.0689-3.6701)    |
| BLOCK, BUNDLE-BRANCH, BILATERAL                          | 0                                       | 0          | 1                                          | 0.3526        | 0(0-Inf)                 |

| Description                                           | No. of Positive Cases with Disease Code | Case Rate* | No. of Positive Controls with Disease Code | Control Rate* | Relative Risk (95%CI)  |
|-------------------------------------------------------|-----------------------------------------|------------|--------------------------------------------|---------------|------------------------|
| BLOCK, BUNDLE-BRANCH, COMPLETE--BBBC                  | 0                                       | 0          | 2                                          | 0.5709        | 0(0-Inf)               |
| BLOCK, BUNDLE-BRANCH, LEFT--BBBL                      | 8                                       | 63.867     | 253                                        | 88.606        | 0.7208(0.356-1.4595)   |
| BLOCK, BUNDLE-BRANCH, NOS--BBB                        | 0                                       | 0          | 18                                         | 11.3869       | 0(0-Inf)               |
| BLOCK, BUNDLE-BRANCH, RIGHT--BBBR                     | 17                                      | 141.1812   | 196                                        | 71.7528       | 1.9676(1.196-3.237)    |
| BLOCK, EUSTACHIAN TUBE                                | 1                                       | 12.0612    | 20                                         | 6.1089        | 1.9744(0.2631-14.8174) |
| BLOCK, FASCICULAR                                     | 2                                       | 18.7934    | 17                                         | 7.7516        | 2.4244(0.5551-10.5898) |
| BLOCK, HEART                                          | 3                                       | 46.9039    | 62                                         | 57.3569       | 0.8178(0.2562-2.6101)  |
| BLOCK, HEART CONGENITAL, COMPLETE                     | 0                                       | 0          | 1                                          | 0.234         | 0(0-Inf)               |
| BLOCK, HEART, COMPLETE--CHB                           | 5                                       | 65.8394    | 166                                        | 122.9883      | 0.5353(0.2197-1.3047)  |
| BLOCK, HEART, FIRST DEGREE                            | 1                                       | 8.7617     | 23                                         | 9.5017        | 0.9221(0.1239-6.8608)  |
| BLOCK, HEART, HIGH DEGREE                             | 0                                       | 0          | 16                                         | 15.1287       | 0(0-Inf)               |
| BLOCK, HEART, SECOND DEGREE                           | 1                                       | 9.5401     | 21                                         | 9.7833        | 0.9751(0.1305-7.2889)  |
| BLOCK, HEART, SINOAURICULAR                           | 0                                       | 0          | 5                                          | 2.3677        | 0(0-Inf)               |
| BLOCK, HEART, THIRD DEGREE                            | 1                                       | 13.6723    | 20                                         | 15.6613       | 0.873(0.1167-6.5318)   |
| BLOCK, HIS BUNDLE OF KENT                             | 0                                       | 0          | 2                                          | 1.7756        | 0(0-Inf)               |
| BLOCK, NERVE CONDUCTION (EMG)                         | 0                                       | 0          | 4                                          | 0.952         | 0(0-Inf)               |
| BLOCK, PUPILLARY                                      | 0                                       | 0          | 2                                          | 1.1972        | 0(0-Inf)               |
| BLOCK, TRIFASCICULAR                                  | 2                                       | 31.1951    | 11                                         | 10.6308       | 2.9344(0.6454-13.3413) |
| BLOCK, WENCKEBACH'S                                   | 0                                       | 0          | 6                                          | 6.5868        | 0(0-Inf)               |
| BLOOD PRESSURE, BORDERLINE (HIGH)                     | 21                                      | 150.9455   | 941                                        | 233.578       | 0.6462(0.419-0.9967)   |
| BLOOD PRESSURE, CHECK                                 | 97                                      | 783.0113   | 2556                                       | 805.2875      | 0.9723(0.7935-1.1915)  |
| BLOOD PRESSURE, HIGH                                  | 14                                      | 118.1802   | 402                                        | 155.2085      | 0.7614(0.4464-1.2988)  |
| BLOOD PRESSURE, HYPOSTATIC                            | 0                                       | 0          | 1                                          | 0.8877        | 0(0-Inf)               |
| BLOOD PRESSURE, LOW                                   | 1                                       | 11.3655    | 54                                         | 32.6625       | 0.348(0.048-2.5202)    |
| BLOODY STOOLS                                         | 1                                       | 8.5296     | 14                                         | 5.4718        | 1.5588(0.2031-11.9626) |
| BLURRED VISION                                        | 38                                      | 332.9824   | 972                                        | 393.8934      | 0.8454(0.6108-1.1699)  |
| BLUSHING                                              | 0                                       | 0          | 1                                          | 0.2354        | 0(0-Inf)               |
| BODY PIERCING, ANY SITE (INCLUDE STATUS/COMPLICATION) | 0                                       | 0          | 1                                          | 0.2354        | 0(0-Inf)               |
| BODY, ASTEROID                                        | 0                                       | 0          | 14                                         | 8.7832        | 0(0-Inf)               |
| BODY, LEWY                                            | 1                                       | 12.1906    | 14                                         | 9.2355        | 1.32(0.1726-10.0971)   |
| BOIL, AXILLA                                          | 0                                       | 0          | 4                                          | 0.8814        | 0(0-Inf)               |
| BOIL, BUTTOCK                                         | 0                                       | 0          | 4                                          | 1.3634        | 0(0-Inf)               |
| BOIL, EXTREMITY, LOWER                                | 0                                       | 0          | 6                                          | 1.6036        | 0(0-Inf)               |
| BOIL, EXTREMITY, UPPER, NEC                           | 0                                       | 0          | 2                                          | 0.5069        | 0(0-Inf)               |
| BOIL, EYELID                                          | 0                                       | 0          | 1                                          | 0.234         | 0(0-Inf)               |
| BOIL, FACE                                            | 1                                       | 7.1138     | 13                                         | 3.0597        | 2.325(0.3005-17.9898)  |
| BOIL, HEAD, NEC                                       | 0                                       | 0          | 8                                          | 2.1371        | 0(0-Inf)               |
| BOIL, NECK                                            | 0                                       | 0          | 7                                          | 2.7537        | 0(0-Inf)               |
| BOIL, NOS, SEE ALSO CARBUNCLE/FURUNCLE                | 0                                       | 0          | 41                                         | 12.2287       | 0(0-Inf)               |
| BOIL, SCALP                                           | 0                                       | 0          | 1                                          | 0.2354        | 0(0-Inf)               |

| Description                                    | No. of Positive Cases with Disease Code | Case Rate* | No. of Positive Controls with Disease Code | Control Rate* | Relative Risk (95%CI) |
|------------------------------------------------|-----------------------------------------|------------|--------------------------------------------|---------------|-----------------------|
| BOIL, TRUNK                                    | 0                                       | 0          | 26                                         | 7.8482        | 0(0-Inf)              |
| BOIL, VULVA                                    | 0                                       | 0          | 1                                          | 0.234         | 0(0-Inf)              |
| BONE CHIP CODE ALSO FRACTURE BY SITE IF STATED | 0                                       | 0          | 2                                          | 0.4709        | 0(0-Inf)              |
| BORBORYGMUS                                    | 0                                       | 0          | 3                                          | 0.8118        | 0(0-Inf)              |
| BORDERLINE BLOOD SUGAR                         | 4                                       | 27.8309    | 108                                        | 28.3708       | 0.981(0.3606-2.6683)  |
| BOTRYOMYCOSIS                                  | 0                                       | 0          | 1                                          | 0.8878        | 0(0-Inf)              |
| BOWING, MITRAL VALVE                           | 0                                       | 0          | 6                                          | 1.3432        | 0(0-Inf)              |
| BOWING, TIBIA                                  | 0                                       | 0          | 1                                          | 0.405         | 0(0-Inf)              |
| BOWING, VOCAL CORD                             | 6                                       | 55.7051    | 106                                        | 47.206        | 1.18(0.517-2.6932)    |
| BOWLEG                                         | 0                                       | 0          | 2                                          | 0.5458        | 0(0-Inf)              |
| BRACHYTHERAPY                                  | 2                                       | 19.7666    | 35                                         | 17.2212       | 1.1478(0.2749-4.7921) |
| BRADYARRHYTHMIA                                | 1                                       | 12.8151    | 10                                         | 7.1084        | 1.8028(0.2289-14.198) |
| BRADYCARDIA, NOS                               | 39                                      | 536.482    | 596                                        | 453.0765      | 1.1841(0.8557-1.6384) |
| BRADYCARDIA, SINUS                             | 10                                      | 102.9689   | 176                                        | 91.4206       | 1.1263(0.5945-2.1339) |
| BRADYCARDIA, SINUS CHRONIC                     | 0                                       | 0          | 2                                          | 1.0788        | 0(0-Inf)              |
| BRADYCARDIA, WITH (PAROXYSMAL) TACHYCARDIA     | 1                                       | 8.5886     | 20                                         | 7.9106        | 1.0857(0.1448-8.1433) |
| BRADYKINESIA (MOVEMENT DISORDER)               | 0                                       | 0          | 16                                         | 5.9661        | 0(0-Inf)              |
| BREAK RETINA                                   | 1                                       | 7.1153     | 26                                         | 7.3821        | 0.9638(0.1301-7.1402) |
| BREAST BUDS                                    | 0                                       | 0          | 1                                          | 0.2729        | 0(0-Inf)              |
| BRIDGE MYOCARDIAL                              | 0                                       | 0          | 1                                          | 0.234         | 0(0-Inf)              |
| BRITTLE, HAIR                                  | 0                                       | 0          | 1                                          | 0.2354        | 0(0-Inf)              |
| BRITTLE, NAILS, NOS                            | 1                                       | 7.1888     | 34                                         | 9.5655        | 0.7515(0.1023-5.5185) |
| BROMHDROSIS                                    | 0                                       | 0          | 1                                          | 0.2354        | 0(0-Inf)              |
| BRONCHIECTASIS, NOS                            | 7                                       | 60.4044    | 179                                        | 71.0158       | 0.8506(0.3989-1.8136) |
| BRONCHIOLITIS, ACUTE                           | 0                                       | 0          | 5                                          | 2.5955        | 0(0-Inf)              |
| BRONCHIOLITIS, CHRONIC                         | 0                                       | 0          | 6                                          | 3.1064        | 0(0-Inf)              |
| BRONCHIOLITIS, NOS                             | 0                                       | 0          | 14                                         | 3.5804        | 0(0-Inf)              |
| BRONCHIOLITIS, OBLITERANS                      | 1                                       | 9.8149     | 21                                         | 10.2175       | 0.9606(0.1285-7.1802) |
| BRONCHITIS, ACUTE                              | 71                                      | 526.8033   | 1891                                       | 526.9491      | 0.9997(0.7883-1.2679) |
| BRONCHITIS, ALLERGIC                           | 0                                       | 0          | 21                                         | 5.7097        | 0(0-Inf)              |
| BRONCHITIS, ASTHMATIC                          | 29                                      | 208.2721   | 623                                        | 152.786       | 1.3632(0.9381-1.9808) |
| BRONCHITIS, ASTHMATIC, ACUTE                   | 0                                       | 0          | 17                                         | 4.3683        | 0(0-Inf)              |
| BRONCHITIS, CHRONIC WITH ACUTE EXACERBATION    | 0                                       | 0          | 15                                         | 4.3765        | 0(0-Inf)              |
| BRONCHITIS, CHRONIC, ASTHMATIC                 | 2                                       | 14.0923    | 34                                         | 9.0172        | 1.5628(0.3729-6.5497) |
| BRONCHITIS, CHRONIC, NOS                       | 26                                      | 187.1313   | 466                                        | 126.2442      | 1.4823(0.9971-2.2036) |
| BRONCHITIS, CHRONIC, OBSTRUCTIVE               | 0                                       | 0          | 3                                          | 0.7175        | 0(0-Inf)              |
| BRONCHITIS, NOS                                | 212                                     | 1860.707   | 5773                                       | 1898.1901     | 0.9803(0.8544-1.1246) |
| BRONCHITIS, PURULENT (CHRONIC)                 | 3                                       | 22.3557    | 44                                         | 13.4352       | 1.664(0.5137-5.3899)  |
| BRONCHITIS, PURULENT, ACUTE                    | 0                                       | 0          | 8                                          | 2.6909        | 0(0-Inf)              |
| BRONCHITIS, SEPTIC                             | 0                                       | 0          | 2                                          | 0.4853        | 0(0-Inf)              |

| Description                                        | No. of Positive Cases with Disease Code | Case Rate* | No. of Positive Controls with Disease Code | Control Rate* | Relative Risk (95%CI)    |
|----------------------------------------------------|-----------------------------------------|------------|--------------------------------------------|---------------|--------------------------|
| BRONCHITIS, SMOKER'S                               | 4                                       | 35.2956    | 91                                         | 23.4638       | 1.5043(0.5508-4.1079)    |
| BRONCHITIS, SUBACUTE                               | 4                                       | 32.9447    | 89                                         | 21.132        | 1.559(0.5703-4.2618)     |
| BRONCHITIS, TOBACCO                                | 3                                       | 31.5344    | 104                                        | 28.8993       | 1.0912(0.3454-3.4475)    |
| BRONCHITIS, VIRAL                                  | 16                                      | 115.1789   | 371                                        | 88.9832       | 1.2944(0.7834-2.1388)    |
| BRONCHITIS, VIRAL, ACUTE                           | 0                                       | 0          | 16                                         | 4.329         | 0(0-Inf)                 |
| BRONCHITIS, WITH INFLUENZA                         | 0                                       | 0          | 5                                          | 1.3366        | 0(0-Inf)                 |
| BRONCHITIS, WITH LARYNGITIS                        | 0                                       | 0          | 3                                          | 0.7064        | 0(0-Inf)                 |
| BRONCHOLITHIASIS                                   | 0                                       | 0          | 2                                          | 0.6775        | 0(0-Inf)                 |
| BRONCHOMALACIA                                     | 0                                       | 0          | 2                                          | 0.5709        | 0(0-Inf)                 |
| BRONCHOPNEUMONIA, ACUTE                            | 0                                       | 0          | 2                                          | 0.5458        | 0(0-Inf)                 |
| BRONCHOPNEUMONIA, HEMOPHILUS INFLUENZAE            | 1                                       | 9.9298     | 1                                          | 0.4943        | 20.0893(1.201-336.0333)  |
| BRONCHOPNEUMONIA, NEC                              | 0                                       | 0          | 2                                          | 1.1971        | 0(0-Inf)                 |
| BRONCHOPNEUMONIA, NOS                              | 3                                       | 22.8116    | 98                                         | 31.286        | 0.7291(0.2305-2.3061)    |
| BRONCHOPNEUMONIA, STAPHYLOCOCCAL                   | 0                                       | 0          | 1                                          | 0.4048        | 0(0-Inf)                 |
| BRONCHOPNEUMONITIS (SEE ALSO BRONCHOPNEUMONIA)     | 0                                       | 0          | 5                                          | 2.2759        | 0(0-Inf)                 |
| BRONCHORRHEA                                       | 0                                       | 0          | 1                                          | 0.398         | 0(0-Inf)                 |
| BRONCHOSPASM                                       | 17                                      | 121.1633   | 668                                        | 184.5872      | 0.6564(0.4052-1.0633)    |
| BRUISE, NEC, SEE ALSO CONTUSION                    | 2                                       | 18.7499    | 85                                         | 38.8098       | 0.4831(0.1186-1.9675)    |
| BRUIT, ABDOMINAL                                   | 2                                       | 15.361     | 64                                         | 20.6319       | 0.7445(0.1816-3.0518)    |
| BRUIT, CAROTID                                     | 22                                      | 194.058    | 721                                        | 290.7709      | 0.6674(0.4363-1.0209)    |
| BRUIT, NOS                                         | 0                                       | 0          | 114                                        | 32.2137       | 0(0-Inf)                 |
| BRUIT, ORBITAL                                     | 0                                       | 0          | 2                                          | 0.4708        | 0(0-Inf)                 |
| BRUXISM                                            | 2                                       | 13.926     | 87                                         | 21.1822       | 0.6574(0.1614-2.6783)    |
| BULGING, DISC/NUCLEUS PULPOSUS SEE ALSO HERNIA     | 0                                       | 0          | 3                                          | 1.1479        | 0(0-Inf)                 |
| BULGING, TYMPANIC MEMBRANES                        | 0                                       | 0          | 1                                          | 0.234         | 0(0-Inf)                 |
| BULIMIA, NOS                                       | 0                                       | 0          | 1                                          | 0.234         | 0(0-Inf)                 |
| BULLA, LUNG                                        | 1                                       | 7.1264     | 20                                         | 5.0262        | 1.4178(0.189-10.6359)    |
| BULLA, NOS (SKIN)                                  | 5                                       | 40.7162    | 121                                        | 43.6715       | 0.9323(0.3802-2.2863)    |
| BUNION                                             | 22                                      | 157.1023   | 678                                        | 171.9249      | 0.9138(0.5969-1.3989)    |
| BUNIONETTE                                         | 0                                       | 0          | 48                                         | 11.3148       | 0(0-Inf)                 |
| BURN, 00 TO 10 PERCENT OF BODY SURFACE             | 0                                       | 0          | 18                                         | 4.3345        | 0(0-Inf)                 |
| BURN, 10 TO 19 PERCENT OF BODY SURFACE             | 1                                       | 7.6994     | 1                                          | 0.3295        | 23.3704(1.3845-394.4864) |
| BURN, 20 TO 29 PERCENT OF BODY SURFACE             | 0                                       | 0          | 2                                          | 0.5457        | 0(0-Inf)                 |
| BURN, 30 TO 39 PERCENT OF BODY SURFACE             | 0                                       | 0          | 1                                          | 0.8877        | 0(0-Inf)                 |
| BURN, 50 TO 59 PERCENT OF BODY SURFACE             | 0                                       | 0          | 1                                          | 0.2729        | 0(0-Inf)                 |
| BURN, ABDOMINAL WALL, COMPLICATED, ANY DEGREE      | 0                                       | 0          | 2                                          | 0.4853        | 0(0-Inf)                 |
| BURN, ABDOMINAL WALL, FIRST DEGREE, UNCOMPLICATED  | 0                                       | 0          | 3                                          | 0.7461        | 0(0-Inf)                 |
| BURN, ABDOMINAL WALL, LATE EFFECT                  | 0                                       | 0          | 1                                          | 0.8538        | 0(0-Inf)                 |
| BURN, ABDOMINAL WALL, SECOND DEGREE, UNCOMPLICATED | 0                                       | 0          | 10                                         | 2.468         | 0(0-Inf)                 |
| BURN, ABDOMINAL WALL, THIRD DEGREE, UNCOMPLICATED  | 0                                       | 0          | 1                                          | 0.8541        | 0(0-Inf)                 |

| Description                                             | No. of Positive Cases with Disease Code | Case Rate* | No. of Positive Controls with Disease Code | Control Rate* | Relative Risk (95%CI)    |
|---------------------------------------------------------|-----------------------------------------|------------|--------------------------------------------|---------------|--------------------------|
| BURN, ABDOMINAL WALL, UNSPECIFIED DEGREE, UNCOMPLICATED | 0                                       | 0          | 7                                          | 1.6275        | 0(0-Inf)                 |
| BURN, ACID, CODE ALSO BY SITE                           | 0                                       | 0          | 8                                          | 2.1128        | 0(0-Inf)                 |
| BURN, ALKALINE, CORNEA, CONJUNCTIVA                     | 0                                       | 0          | 2                                          | 0.5475        | 0(0-Inf)                 |
| BURN, AXILLA, LATE EFFECT                               | 0                                       | 0          | 1                                          | 0.8528        | 0(0-Inf)                 |
| BURN, AXILLA, THIRD DEGREE, UNCOMPLICATED               | 1                                       | 14.0231    | 1                                          | 0.8074        | 17.3676(1.0508-287.0395) |
| BURN, BACK, FIRST DEGREE, UNCOMPLICATED                 | 0                                       | 0          | 1                                          | 0.8535        | 0(0-Inf)                 |
| BURN, BACK, LATE EFFECT                                 | 0                                       | 0          | 2                                          | 1.1971        | 0(0-Inf)                 |
| BURN, BACK, SECOND DEGREE, UNCOMPLICATED                | 0                                       | 0          | 6                                          | 1.5037        | 0(0-Inf)                 |
| BURN, BACK, THIRD DEGREE, UNCOMPLICATED                 | 0                                       | 0          | 1                                          | 0.4049        | 0(0-Inf)                 |
| BURN, BACK, UNSPECIFIED DEGREE, UNCOMPLICATED           | 1                                       | 7.0695     | 7                                          | 1.7339        | 4.0773(0.4927-33.7434)   |
| BURN, BREAST, FIRST DEGREE, UNCOMPLICATED               | 0                                       | 0          | 1                                          | 0.2354        | 0(0-Inf)                 |
| BURN, BREAST, SECOND DEGREE, UNCOMPLICATED              | 0                                       | 0          | 3                                          | 0.8118        | 0(0-Inf)                 |
| BURN, BREAST, UNSPECIFIED DEGREE, UNCOMPLICATED         | 0                                       | 0          | 3                                          | 0.6549        | 0(0-Inf)                 |
| BURN, BUTTOCK, COMPLICATED, ANY DEGREE                  | 0                                       | 0          | 1                                          | 0.3526        | 0(0-Inf)                 |
| BURN, BUTTOCK, SECOND DEGREE, UNCOMPLICATED             | 1                                       | 8.8461     | 1                                          | 0.2902        | 30.4814(1.8366-505.9008) |
| BURN, BUTTOCK, THIRD DEGREE, UNCOMPLICATED              | 0                                       | 0          | 1                                          | 0.8534        | 0(0-Inf)                 |
| BURN, BUTTOCK, UNSPECIFIED DEGREE, UNCOMPLICATED        | 0                                       | 0          | 3                                          | 0.741         | 0(0-Inf)                 |
| BURN, CALF, SECOND DEGREE, UNCOMPLICATED                | 0                                       | 0          | 1                                          | 0.8272        | 0(0-Inf)                 |
| BURN, CAUSTIC, CODE ALSO BY SITE                        | 0                                       | 0          | 2                                          | 0.8723        | 0(0-Inf)                 |
| BURN, CHEMICAL, NEC, CODE ALSO BY SITE                  | 2                                       | 17.0772    | 55                                         | 14.4205       | 1.1842(0.2878-4.8727)    |
| BURN, CHEST WALL, FIRST DEGREE, UNCOMPLICATED           | 0                                       | 0          | 4                                          | 0.9671        | 0(0-Inf)                 |
| BURN, CHEST WALL, LATE EFFECT                           | 0                                       | 0          | 1                                          | 0.398         | 0(0-Inf)                 |
| BURN, CHEST WALL, SECOND DEGREE, UNCOMPLICATED          | 0                                       | 0          | 8                                          | 2.1515        | 0(0-Inf)                 |
| BURN, CHEST WALL, THIRD DEGREE, UNCOMPLICATED           | 1                                       | 7.7865     | 2                                          | 0.6826        | 11.4065(0.9971-130.4867) |
| BURN, CHEST WALL, UNSPECIFIED DEGREE, UNCOMPLICATED     | 2                                       | 14.2926    | 3                                          | 0.734         | 19.4714(3.1417-120.6793) |
| BURN, CORNEA/CONJUNCTIVA, NEC                           | 0                                       | 0          | 1                                          | 0.4048        | 0(0-Inf)                 |
| BURN, EAR, SECOND DEGREE, UNCOMPLICATED                 | 0                                       | 0          | 2                                          | 0.5476        | 0(0-Inf)                 |
| BURN, EAR, UNSPECIFIED DEGREE, UNCOMPLICATED            | 0                                       | 0          | 5                                          | 1.4455        | 0(0-Inf)                 |
| BURN, ELECTRICAL, CODE ALSO BY SITE                     | 0                                       | 0          | 9                                          | 2.6475        | 0(0-Inf)                 |
| BURN, EYE, LATE EFFECT                                  | 1                                       | 11.7494    | 2                                          | 0.6292        | 18.6739(1.6302-213.9087) |
| BURN, EYE, UNSPECIFIED DEGREE, UNCOMPLICATED            | 2                                       | 25.3611    | 47                                         | 15.9889       | 1.5862(0.3839-6.5531)    |
| BURN, EYELID, LATE EFFECT                               | 0                                       | 0          | 1                                          | 0.398         | 0(0-Inf)                 |
| BURN, EYELID, UNSPECIFIED DEGREE, UNCOMPLICATED         | 0                                       | 0          | 6                                          | 1.5938        | 0(0-Inf)                 |
| BURN, FACE, COMPLICATED, ANY DEGREE                     | 0                                       | 0          | 1                                          | 0.4048        | 0(0-Inf)                 |
| BURN, FACE, FIRST DEGREE, UNCOMPLICATED                 | 1                                       | 8.7771     | 17                                         | 4.525         | 1.9397(0.256-14.6939)    |
| BURN, FACE, LATE EFFECT                                 | 0                                       | 0          | 1                                          | 0.2729        | 0(0-Inf)                 |
| BURN, FACE, SECOND DEGREE, UNCOMPLICATED                | 0                                       | 0          | 15                                         | 3.7435        | 0(0-Inf)                 |
| BURN, FACE, THIRD DEGREE, UNCOMPLICATED                 | 0                                       | 0          | 1                                          | 0.4751        | 0(0-Inf)                 |
| BURN, FACE, UNSPECIFIED DEGREE, UNCOMPLICATED           | 1                                       | 7.9187     | 28                                         | 6.7178        | 1.1788(0.1594-8.7151)    |
| BURN, FINGER, COMPLICATED, ANY DEGREE                   | 0                                       | 0          | 2                                          | 0.7052        | 0(0-Inf)                 |

| Description                                              | No. of Positive Cases with Disease Code | Case Rate* | No. of Positive Controls with Disease Code | Control Rate* | Relative Risk (95%CI)    |
|----------------------------------------------------------|-----------------------------------------|------------|--------------------------------------------|---------------|--------------------------|
| BURN, FINGER, FIRST DEGREE, UNCOMPLICATED                | 0                                       | 0          | 3                                          | 0.8018        | 0(0-Inf)                 |
| BURN, FINGER, LATE EFFECT                                | 0                                       | 0          | 1                                          | 0.4048        | 0(0-Inf)                 |
| BURN, FINGER, SECOND DEGREE, UNCOMPLICATED               | 0                                       | 0          | 38                                         | 9.5688        | 0(0-Inf)                 |
| BURN, FINGER, THIRD DEGREE, UNCOMPLICATED                | 0                                       | 0          | 2                                          | 0.5837        | 0(0-Inf)                 |
| BURN, FINGER, UNSPECIFIED DEGREE, UNCOMPLICATED          | 1                                       | 9.5747     | 38                                         | 10.2182       | 0.937(0.1281-6.8526)     |
| BURN, FLAME, CODE ALSO BY SITE                           | 0                                       | 0          | 1                                          | 0.3526        | 0(0-Inf)                 |
| BURN, FLANK, FIRST DEGREE, UNCOMPLICATED                 | 0                                       | 0          | 1                                          | 0.2729        | 0(0-Inf)                 |
| BURN, FLANK, THIRD DEGREE, UNCOMPLICATED                 | 0                                       | 0          | 1                                          | 0.8541        | 0(0-Inf)                 |
| BURN, FLANK, UNSPECIFIED DEGREE, UNCOMPLICATED           | 0                                       | 0          | 3                                          | 0.8187        | 0(0-Inf)                 |
| BURN, FOOT, COMPLICATED, ANY DEGREE                      | 0                                       | 0          | 2                                          | 0.4854        | 0(0-Inf)                 |
| BURN, FOOT, FIRST DEGREE, UNCOMPLICATED                  | 1                                       | 12.768     | 3                                          | 0.8156        | 15.6545(1.5791-155.19)   |
| BURN, FOOT, LATE EFFECT                                  | 0                                       | 0          | 2                                          | 0.5457        | 0(0-Inf)                 |
| BURN, FOOT, SECOND DEGREE, UNCOMPLICATED                 | 1                                       | 7.0969     | 21                                         | 5.0833        | 1.3961(0.1864-10.4565)   |
| BURN, FOOT, THIRD DEGREE, UNCOMPLICATED                  | 0                                       | 0          | 3                                          | 0.797         | 0(0-Inf)                 |
| BURN, FOOT, UNSPECIFIED DEGREE, UNCOMPLICATED            | 1                                       | 7.0281     | 31                                         | 7.6002        | 0.9247(0.1256-6.808)     |
| BURN, FRICTION, CODE ALSO INJURY, SUPERFICIAL BY SITE    | 1                                       | 6.9559     | 4                                          | 0.9783        | 7.1098(0.7701-65.6384)   |
| BURN, GREASE, CODE ALSO BY SITE                          | 0                                       | 0          | 4                                          | 1.9947        | 0(0-Inf)                 |
| BURN, GROIN, FIRST DEGREE, UNCOMPLICATED                 | 0                                       | 0          | 1                                          | 0.4751        | 0(0-Inf)                 |
| BURN, GROIN, LATE EFFECT                                 | 0                                       | 0          | 1                                          | 0.2729        | 0(0-Inf)                 |
| BURN, GROIN, SECOND DEGREE, UNCOMPLICATED                | 0                                       | 0          | 1                                          | 0.4751        | 0(0-Inf)                 |
| BURN, HAND, COMPLICATED, ANY DEGREE                      | 0                                       | 0          | 5                                          | 1.2092        | 0(0-Inf)                 |
| BURN, HAND, FIRST DEGREE, UNCOMPLICATED                  | 4                                       | 32.1197    | 21                                         | 5.0729        | 6.3316(2.1459-18.6817)   |
| BURN, HAND, LATE EFFECT                                  | 0                                       | 0          | 2                                          | 0.5069        | 0(0-Inf)                 |
| BURN, HAND, SECOND DEGREE, UNCOMPLICATED                 | 5                                       | 45.1222    | 78                                         | 20.2141       | 2.2322(0.8999-5.5371)    |
| BURN, HAND, THIRD DEGREE, UNCOMPLICATED                  | 0                                       | 0          | 2                                          | 0.432         | 0(0-Inf)                 |
| BURN, HAND, UNSPECIFIED DEGREE, UNCOMPLICATED            | 3                                       | 22.5657    | 64                                         | 15.5293       | 1.4531(0.4547-4.6441)    |
| BURN, HEAD, FIRST DEGREE, UNCOMPLICATED                  | 0                                       | 0          | 1                                          | 0.4751        | 0(0-Inf)                 |
| BURN, HEAD, UNSPECIFIED DEGREE, UNCOMPLICATED            | 0                                       | 0          | 4                                          | 1.3221        | 0(0-Inf)                 |
| BURN, HOT OBJECT, CODE ALSO BY SITE                      | 0                                       | 0          | 4                                          | 0.9157        | 0(0-Inf)                 |
| BURN, INFECTED, CODE ALSO BY SITE, COMPLICATED           | 0                                       | 0          | 25                                         | 6.116         | 0(0-Inf)                 |
| BURN, INHALATION                                         | 0                                       | 0          | 3                                          | 0.9166        | 0(0-Inf)                 |
| BURN, INTERNAL ORGAN, NOS                                | 0                                       | 0          | 1                                          | 0.8528        | 0(0-Inf)                 |
| BURN, LARYNX                                             | 0                                       | 0          | 2                                          | 1.0787        | 0(0-Inf)                 |
| BURN, LIP, UNSPECIFIED DEGREE, UNCOMPLICATED             | 1                                       | 7.3004     | 5                                          | 1.4899        | 4.8998(0.5592-42.9324)   |
| BURN, LOWER EXTREMITY, NEC, COMPLICATED, ANY DEGREE      | 1                                       | 7.1185     | 6                                          | 1.3535        | 5.2593(0.6169-44.8332)   |
| BURN, LOWER EXTREMITY, NEC, FIRST DEGREE, UNCOMPLICATED  | 1                                       | 7.0581     | 10                                         | 2.7388        | 2.5771(0.3253-20.4167)   |
| BURN, LOWER EXTREMITY, NEC, LATE EFFECT                  | 1                                       | 7.0335     | 1                                          | 0.265         | 26.5455(1.5982-440.9225) |
| BURN, LOWER EXTREMITY, NEC, SECOND DEGREE, UNCOMPLICATED | 2                                       | 14.0161    | 33                                         | 8.8103        | 1.5909(0.3793-6.6731)    |
| BURN, LOWER EXTREMITY, NEC, THIRD DEGREE, UNCOMPLICATED  | 1                                       | 6.9644     | 5                                          | 1.2842        | 5.4231(0.6168-47.6827)   |

| Description                                                   | No. of Positive Cases with Disease Code | Case Rate* | No. of Positive Controls with Disease Code | Control Rate* | Relative Risk (95%CI)    |
|---------------------------------------------------------------|-----------------------------------------|------------|--------------------------------------------|---------------|--------------------------|
| BURN, LOWER EXTREMITY, NEC, UNSPECIFIED DEGREE, UNCOMPLICATED | 1                                       | 7.1336     | 49                                         | 11.6775       | 0.6109(0.0841-4.4369)    |
| BURN, LUNG                                                    | 0                                       | 0          | 1                                          | 0.234         | 0(0-Inf)                 |
| BURN, MOUTH, COMPLICATED, ANY DEGREE                          | 0                                       | 0          | 1                                          | 0.234         | 0(0-Inf)                 |
| BURN, MOUTH, LATE EFFECT                                      | 0                                       | 0          | 1                                          | 0.4751        | 0(0-Inf)                 |
| BURN, MOUTH, SECOND DEGREE, UNCOMPLICATED                     | 0                                       | 0          | 1                                          | 0.4049        | 0(0-Inf)                 |
| BURN, MOUTH, UNSPECIFIED DEGREE, UNCOMPLICATED                | 0                                       | 0          | 5                                          | 1.2093        | 0(0-Inf)                 |
| BURN, MULTIPLE SITES, NOS, LATE EFFECT                        | 0                                       | 0          | 1                                          | 0.3526        | 0(0-Inf)                 |
| BURN, MULTIPLE SITES, NOS, SECOND DEGREE, UNCOMPLICATED       | 1                                       | 8.5014     | 1                                          | 0.2217        | 38.3419(2.2505-653.2373) |
| BURN, MULTIPLE SITES, NOS, UNSPECIFIED DEGREE, UNCOMPLICATED  | 0                                       | 0          | 1                                          | 1.0369        | 0(0-Inf)                 |
| BURN, NECK, FIRST DEGREE, UNCOMPLICATED                       | 0                                       | 0          | 3                                          | 0.8457        | 0(0-Inf)                 |
| BURN, NECK, SECOND DEGREE, UNCOMPLICATED                      | 0                                       | 0          | 4                                          | 0.9671        | 0(0-Inf)                 |
| BURN, NECK, THIRD DEGREE, UNCOMPLICATED                       | 1                                       | 30.6659    | 0                                          | 0             | 14431018908.3976(0-Inf)  |
| BURN, NECK, UNSPECIFIED DEGREE, UNCOMPLICATED                 | 1                                       | 7.9725     | 4                                          | 1.0009        | 7.9657(0.8656-73.3041)   |
| BURN, NOS                                                     | 6                                       | 45.1977    | 69                                         | 21.5345       | 2.0989(0.9068-4.858)     |
| BURN, NOS, FIRST DEGREE                                       | 0                                       | 0          | 23                                         | 7.2545        | 0(0-Inf)                 |
| BURN, NOS, LATE EFFECT                                        | 1                                       | 8.7677     | 5                                          | 2.0555        | 4.2656(0.4891-37.1998)   |
| BURN, NOS, SECOND DEGREE                                      | 1                                       | 7.8487     | 35                                         | 11.8747       | 0.661(0.0902-4.8445)     |
| BURN, NOS, THIRD DEGREE                                       | 1                                       | 7.6977     | 1                                          | 0.3294        | 23.3675(1.3843-394.4617) |
| BURN, NOSE, FIRST DEGREE, UNCOMPLICATED                       | 0                                       | 0          | 1                                          | 0.398         | 0(0-Inf)                 |
| BURN, ORO-NASOPHARYNX                                         | 0                                       | 0          | 1                                          | 0.2729        | 0(0-Inf)                 |
| BURN, PERINEUM, COMPLICATED, ANY DEGREE                       | 0                                       | 0          | 1                                          | 0.3526        | 0(0-Inf)                 |
| BURN, PERINEUM, SECOND DEGREE, UNCOMPLICATED                  | 0                                       | 0          | 1                                          | 0.4751        | 0(0-Inf)                 |
| BURN, PERINEUM, UNSPECIFIED DEGREE, UNCOMPLICATED             | 0                                       | 0          | 1                                          | 0.234         | 0(0-Inf)                 |
| BURN, RADIATION, NEC, CODE ALSO BY SITE                       | 0                                       | 0          | 1                                          | 0.8877        | 0(0-Inf)                 |
| BURN, SCALP, THIRD DEGREE, UNCOMPLICATED                      | 0                                       | 0          | 1                                          | 0.4751        | 0(0-Inf)                 |
| BURN, SCALP, UNSPECIFIED DEGREE, UNCOMPLICATED                | 1                                       | 11.6834    | 0                                          | 0             | 8837757701.3336(0-Inf)   |
| BURN, SCROTUM, LATE EFFECT                                    | 0                                       | 0          | 1                                          | 0.2729        | 0(0-Inf)                 |
| BURN, SCROTUM, SECOND DEGREE, UNCOMPLICATED                   | 0                                       | 0          | 1                                          | 0.4751        | 0(0-Inf)                 |
| BURN, SCROTUM, UNSPECIFIED DEGREE, UNCOMPLICATED              | 0                                       | 0          | 1                                          | 0.3526        | 0(0-Inf)                 |
| BURN, SHOULDER, FIRST DEGREE, UNCOMPLICATED                   | 0                                       | 0          | 1                                          | 0.3527        | 0(0-Inf)                 |
| BURN, SHOULDER, THIRD DEGREE, UNCOMPLICATED                   | 1                                       | 30.6659    | 0                                          | 0             | 14431018908.3976(0-Inf)  |
| BURN, SHOULDER, UNSPECIFIED DEGREE, UNCOMPLICATED             | 1                                       | 6.9229     | 4                                          | 0.9724        | 7.1197(0.7693-65.8886)   |
| BURN, THROAT, UNSPECIFIED DEGREE, UNCOMPLICATED               | 0                                       | 0          | 2                                          | 0.7052        | 0(0-Inf)                 |
| BURN, TONGUE                                                  | 0                                       | 0          | 1                                          | 0.234         | 0(0-Inf)                 |
| BURN, TRACHEA                                                 | 0                                       | 0          | 3                                          | 0.9166        | 0(0-Inf)                 |
| BURN, TRUNK, LATE EFFECT                                      | 0                                       | 0          | 1                                          | 0.398         | 0(0-Inf)                 |
| BURN, TRUNK, SECOND DEGREE, UNCOMPLICATED                     | 0                                       | 0          | 4                                          | 0.9237        | 0(0-Inf)                 |
| BURN, ULTRAVIOLET, CODE ALSO BY SITE                          | 0                                       | 0          | 5                                          | 3.1126        | 0(0-Inf)                 |



| Description                                                   | No. of Positive Cases with Disease Code | Case Rate* | No. of Positive Controls with Disease Code | Control Rate* | Relative Risk (95%CI)    |
|---------------------------------------------------------------|-----------------------------------------|------------|--------------------------------------------|---------------|--------------------------|
| BURN, UPPER EXTREMITY, NEC, COMPLICATED, ANY DEGREE           | 0                                       | 0          | 5                                          | 1.2369        | 0(0-Inf)                 |
| BURN, UPPER EXTREMITY, NEC, FIRST DEGREE, UNCOMPLICATED       | 1                                       | 7.5858     | 19                                         | 4.5407        | 1.6706(0.2218-12.5851)   |
| BURN, UPPER EXTREMITY, NEC, LATE EFFECT                       | 1                                       | 13.2774    | 1                                          | 0.3759        | 35.3222(2.1334-584.8163) |
| BURN, UPPER EXTREMITY, NEC, SECOND DEGREE, UNCOMPLICATED      | 0                                       | 0          | 54                                         | 13.0929       | 0(0-Inf)                 |
| BURN, UPPER EXTREMITY, NEC, THIRD DEGREE, UNCOMPLICATED       | 0                                       | 0          | 2                                          | 0.5709        | 0(0-Inf)                 |
| BURN, UPPER EXTREMITY, NEC, UNSPECIFIED DEGREE, UNCOMPLICATED | 2                                       | 16.4233    | 50                                         | 12.1827       | 1.3481(0.3265-5.5654)    |
| BURN, VAGINA                                                  | 0                                       | 0          | 1                                          | 0.4048        | 0(0-Inf)                 |
| BURN, VULVA, UNSPECIFIED DEGREE, UNCOMPLICATED                | 0                                       | 0          | 1                                          | 0.2354        | 0(0-Inf)                 |
| BURN, WRIST, FIRST DEGREE, UNCOMPLICATED                      | 0                                       | 0          | 4                                          | 1.0711        | 0(0-Inf)                 |
| BURN, WRIST, LATE EFFECT                                      | 0                                       | 0          | 1                                          | 0.4049        | 0(0-Inf)                 |
| BURN, WRIST, SECOND DEGREE, UNCOMPLICATED                     | 0                                       | 0          | 9                                          | 2.1465        | 0(0-Inf)                 |
| BURN, WRIST, THIRD DEGREE, UNCOMPLICATED                      | 0                                       | 0          | 1                                          | 0.8541        | 0(0-Inf)                 |
| BURN, WRIST, UNSPECIFIED DEGREE, UNCOMPLICATED                | 0                                       | 0          | 8                                          | 1.8476        | 0(0-Inf)                 |
| BURNING, FEET, NOS                                            | 0                                       | 0          | 36                                         | 12.6788       | 0(0-Inf)                 |
| BURNING, GASTRIC (FUNCTIONAL)                                 | 1                                       | 8.6772     | 14                                         | 5.6498        | 1.5358(0.2003-11.7778)   |
| BURNING, MOUTH                                                | 9                                       | 64.1391    | 60                                         | 15.9891       | 4.0114(1.9757-8.1447)    |
| BURNING, SENSATION, SEE ALSO PARESTHESIA                      | 2                                       | 14.2003    | 100                                        | 27.3901       | 0.5184(0.1276-2.1068)    |
| BURNING, TONGUE                                               | 1                                       | 6.9846     | 43                                         | 11.1076       | 0.6288(0.0862-4.5854)    |
| BURSA, NOS, SEE ALSO BURSITIS                                 | 0                                       | 0          | 2                                          | 0.5709        | 0(0-Inf)                 |
| BURSITIS, ACHILLES TENDON                                     | 0                                       | 0          | 25                                         | 5.9063        | 0(0-Inf)                 |
| BURSITIS, ANKLE                                               | 1                                       | 6.9862     | 11                                         | 2.6646        | 2.6219(0.3339-20.5905)   |
| BURSITIS, BUTTOCK                                             | 1                                       | 7.0411     | 8                                          | 1.8896        | 3.7263(0.4573-30.3643)   |
| BURSITIS, CALCANEAL                                           | 4                                       | 27.9408    | 92                                         | 22.2228       | 1.2573(0.4604-3.4338)    |
| BURSITIS, ELBOW                                               | 0                                       | 0          | 58                                         | 15.4882       | 0(0-Inf)                 |
| BURSITIS, FINGER                                              | 0                                       | 0          | 1                                          | 0.2729        | 0(0-Inf)                 |
| BURSITIS, FOOT                                                | 0                                       | 0          | 37                                         | 8.665         | 0(0-Inf)                 |
| BURSITIS, GLUTEAL                                             | 2                                       | 14.0918    | 33                                         | 7.6334        | 1.8461(0.4396-7.7525)    |
| BURSITIS, HIP                                                 | 2                                       | 14.6452    | 120                                        | 35.2532       | 0.4154(0.1025-1.6836)    |
| BURSITIS, ISCHIAL                                             | 7                                       | 49.9704    | 170                                        | 46.9928       | 1.0634(0.4981-2.2701)    |
| BURSITIS, KNEE (ANSERINE)                                     | 21                                      | 149.7113   | 666                                        | 165.7861      | 0.903(0.5842-1.396)      |
| BURSITIS, NOS                                                 | 9                                       | 70.5241    | 229                                        | 77.144        | 0.9142(0.4687-1.783)     |
| BURSITIS, OLECRANON                                           | 25                                      | 180.9765   | 720                                        | 212.8704      | 0.8502(0.5701-1.2678)    |
| BURSITIS, PES ANSERINE                                        | 23                                      | 180.9057   | 649                                        | 215.6476      | 0.8389(0.5528-1.273)     |
| BURSITIS, PREPATELLAR                                         | 14                                      | 98.6449    | 354                                        | 90.8967       | 1.0852(0.6352-1.8542)    |
| BURSITIS, RADIOHUMERAL                                        | 0                                       | 0          | 2                                          | 0.5069        | 0(0-Inf)                 |
| BURSITIS, SCAPULOHUMERAL                                      | 0                                       | 0          | 2                                          | 0.4681        | 0(0-Inf)                 |
| BURSITIS, SHOULDER (DELTOID, ACROMIAL)                        | 19                                      | 134.4648   | 378                                        | 93.9738       | 1.4309(0.9009-2.2726)    |
| BURSITIS, SPINE                                               | 2                                       | 21.9059    | 11                                         | 6.4638        | 3.389(0.7424-15.4702)    |

| Description                                        | No. of Positive Cases with Disease Code | Case Rate* | No. of Positive Controls with Disease Code | Control Rate* | Relative Risk (95%CI)    |
|----------------------------------------------------|-----------------------------------------|------------|--------------------------------------------|---------------|--------------------------|
| BURSITIS, SUBACROMIAL                              | 25                                      | 179.2785   | 725                                        | 197.3548      | 0.9084(0.6091-1.3549)    |
| BURSITIS, SUBACROMIAL, ADHESIVE                    | 0                                       | 0          | 1                                          | 0.4049        | 0(0-Inf)                 |
| BURSITIS, SUBDELTOID                               | 11                                      | 86.1012    | 169                                        | 40.0761       | 2.1484(1.1638-3.966)     |
| BURSITIS, TOE                                      | 0                                       | 0          | 15                                         | 3.3925        | 0(0-Inf)                 |
| BURSITIS, TROCHANTERIC--TBUR                       | 115                                     | 975.7689   | 2988                                       | 976.5447      | 0.9992(0.8289-1.2045)    |
| BURSITIS, VOSHELL'S                                | 0                                       | 0          | 3                                          | 0.7175        | 0(0-Inf)                 |
| BURSITIS, WRIST                                    | 0                                       | 0          | 4                                          | 1.0352        | 0(0-Inf)                 |
| BURST, SUTURE                                      | 0                                       | 0          | 2                                          | 0.7896        | 0(0-Inf)                 |
| CACHEXIA, NOS                                      | 2                                       | 24.7559    | 31                                         | 21.2047       | 1.1675(0.2783-4.8983)    |
| CAFE AU LAIT (SPOT)                                | 0                                       | 0          | 3                                          | 0.746         | 0(0-Inf)                 |
| CALCIFICATION, ADRENAL                             | 0                                       | 0          | 1                                          | 0.888         | 0(0-Inf)                 |
| CALCIFICATION, AORTA, ABDOMINAL                    | 0                                       | 0          | 6                                          | 2.2115        | 0(0-Inf)                 |
| CALCIFICATION, AORTA, NEC                          | 1                                       | 7.9184     | 14                                         | 4.8721        | 1.6253(0.2118-12.4715)   |
| CALCIFICATION, AORTA, THORACIC                     | 0                                       | 0          | 1                                          | 0.8877        | 0(0-Inf)                 |
| CALCIFICATION, ARTERY, SEE ALSO ARTERIOSCLEROSIS   | 0                                       | 0          | 8                                          | 4.2925        | 0(0-Inf)                 |
| CALCIFICATION, ATRIAL WALL                         | 0                                       | 0          | 2                                          | 0.4709        | 0(0-Inf)                 |
| CALCIFICATION, BLADDER                             | 0                                       | 0          | 7                                          | 2.652         | 0(0-Inf)                 |
| CALCIFICATION, BREAST                              | 8                                       | 111.1074   | 288                                        | 136.8147      | 0.8121(0.4015-1.6427)    |
| CALCIFICATION, BRONCHUS                            | 0                                       | 0          | 1                                          | 0.4049        | 0(0-Inf)                 |
| CALCIFICATION, CARDIAC                             | 3                                       | 21.167     | 85                                         | 24.2106       | 0.8743(0.2757-2.7724)    |
| CALCIFICATION, CARTILAGE                           | 0                                       | 0          | 6                                          | 3.1076        | 0(0-Inf)                 |
| CALCIFICATION, CEREBRAL                            | 0                                       | 0          | 2                                          | 0.6309        | 0(0-Inf)                 |
| CALCIFICATION, CONJUNCTIVA                         | 0                                       | 0          | 2                                          | 1.1974        | 0(0-Inf)                 |
| CALCIFICATION, DENTAL PULP                         | 1                                       | 7.896      | 18                                         | 6.1478        | 1.2844(0.1701-9.6979)    |
| CALCIFICATION, DISC                                | 0                                       | 0          | 5                                          | 1.2019        | 0(0-Inf)                 |
| CALCIFICATION, GALLBLADDER                         | 0                                       | 0          | 1                                          | 0.234         | 0(0-Inf)                 |
| CALCIFICATION, HEART VALVE, SEE ALSO ENDOCARDITIS  | 0                                       | 0          | 2                                          | 5.0812        | 0(0-Inf)                 |
| CALCIFICATION, HILAR LYMPH NODE                    | 0                                       | 0          | 5                                          | 1.5263        | 0(0-Inf)                 |
| CALCIFICATION, JOINT                               | 0                                       | 0          | 14                                         | 3.4034        | 0(0-Inf)                 |
| CALCIFICATION, KIDNEY, LATE EFFECT OF TUBERCULOSIS | 0                                       | 0          | 1                                          | 2.4926        | 0(0-Inf)                 |
| CALCIFICATION, KIDNEY, NOS                         | 0                                       | 0          | 5                                          | 1.2018        | 0(0-Inf)                 |
| CALCIFICATION, LENS                                | 0                                       | 0          | 3                                          | 0.8711        | 0(0-Inf)                 |
| CALCIFICATION, LIGAMENT NEC/NOS                    | 0                                       | 0          | 1                                          | 0.8878        | 0(0-Inf)                 |
| CALCIFICATION, LIGAMENT, KNEE                      | 0                                       | 0          | 2                                          | 0.5837        | 0(0-Inf)                 |
| CALCIFICATION, LUNG                                | 0                                       | 0          | 19                                         | 5.4899        | 0(0-Inf)                 |
| CALCIFICATION, LYMPH GLAND                         | 0                                       | 0          | 6                                          | 3.8103        | 0(0-Inf)                 |
| CALCIFICATION, METASTATIC                          | 0                                       | 0          | 1                                          | 0.398         | 0(0-Inf)                 |
| CALCIFICATION, MITRAL ANNULUS                      | 1                                       | 9.8775     | 21                                         | 10.3145       | 0.9576(0.1281-7.1586)    |
| CALCIFICATION, MUSCLE                              | 1                                       | 7.2779     | 2                                          | 0.5821        | 12.5039(1.0765-145.2355) |
| CALCIFICATION, PANCREATIC                          | 0                                       | 0          | 4                                          | 1.2655        | 0(0-Inf)                 |

| Description                                                | No. of Positive Cases with Disease Code | Case Rate* | No. of Positive Controls with Disease Code | Control Rate* | Relative Risk (95%CI)  |
|------------------------------------------------------------|-----------------------------------------|------------|--------------------------------------------|---------------|------------------------|
| CALCIFICATION, PENIS                                       | 0                                       | 0          | 1                                          | 0.3526        | 0(0-Inf)               |
| CALCIFICATION, PERICARDIUM                                 | 0                                       | 0          | 3                                          | 0.746         | 0(0-Inf)               |
| CALCIFICATION, PLEURA, NOS                                 | 1                                       | 7.9962     | 43                                         | 15.8009       | 0.5061(0.0695-3.6839)  |
| CALCIFICATION, PROSTATE                                    | 0                                       | 0          | 9                                          | 3.4512        | 0(0-Inf)               |
| CALCIFICATION, SCLERA                                      | 0                                       | 0          | 1                                          | 0.4048        | 0(0-Inf)               |
| CALCIFICATION, SOFT TISSUE, NEC                            | 0                                       | 0          | 6                                          | 2.1463        | 0(0-Inf)               |
| CALCIFICATION, SPLEEN                                      | 0                                       | 0          | 2                                          | 0.7897        | 0(0-Inf)               |
| CALCIFICATION, SPLENIC ARTERY                              | 0                                       | 0          | 3                                          | 0.7175        | 0(0-Inf)               |
| CALCIFICATION, SUBCUTANEOUS                                | 7                                       | 56.627     | 228                                        | 50.8933       | 1.1127(0.5234-2.3655)  |
| CALCIFICATION, TENDON, CODE ALSO BURSITIS BY SITE IF GIVEN | 0                                       | 0          | 14                                         | 3.2726        | 0(0-Inf)               |
| CALCIFICATION, URETER                                      | 0                                       | 0          | 4                                          | 1.0273        | 0(0-Inf)               |
| CALCIFICATION, UTERUS                                      | 0                                       | 0          | 4                                          | 1.0401        | 0(0-Inf)               |
| CALCIFICATION, VALVULAR                                    | 0                                       | 0          | 7                                          | 2.7309        | 0(0-Inf)               |
| CALCIFIED PEARL TESTES                                     | 0                                       | 0          | 1                                          | 0.3526        | 0(0-Inf)               |
| CALCINOSIS, CUTIS                                          | 1                                       | 6.9474     | 24                                         | 5.9707        | 1.1636(0.1564-8.6571)  |
| CALCINOSIS, NOS                                            | 2                                       | 14.1048    | 13                                         | 3.4733        | 4.0609(0.9022-18.2781) |
| CALCINOSIS, TUMORAL                                        | 0                                       | 0          | 2                                          | 1.7773        | 0(0-Inf)               |
| CALCINOSIS, UNIVERSALIS                                    | 0                                       | 0          | 1                                          | 0.8882        | 0(0-Inf)               |
| CALCIPHYLAXIS                                              | 0                                       | 0          | 1                                          | 0.4048        | 0(0-Inf)               |
| CALCIUM SALTS OR SOAPS (VITREOUS)                          | 0                                       | 0          | 1                                          | 0.2354        | 0(0-Inf)               |
| CALCULUS, AMPULLA OF VATER                                 | 0                                       | 0          | 1                                          | 0.8528        | 0(0-Inf)               |
| CALCULUS, APPENDIX                                         | 0                                       | 0          | 4                                          | 1.5299        | 0(0-Inf)               |
| CALCULUS, BILIRUBIN, CODE ALSO SITE                        | 0                                       | 0          | 1                                          | 2.4856        | 0(0-Inf)               |
| CALCULUS, BLADDER, CALCIUM OXALATE                         | 0                                       | 0          | 2                                          | 0.7054        | 0(0-Inf)               |
| CALCULUS, BLADDER, NOS                                     | 5                                       | 56.977     | 95                                         | 57.6193       | 0.9889(0.4015-2.4352)  |
| CALCULUS, BLADDER, URATE (URIC ACID)                       | 0                                       | 0          | 4                                          | 5.9649        | 0(0-Inf)               |
| CALCULUS, CHOLESTEROL, CODE ALSO BY SITE                   | 0                                       | 0          | 50                                         | 12.0823       | 0(0-Inf)               |
| CALCULUS, COMMON DUCT                                      | 1                                       | 7.6253     | 19                                         | 6.1033        | 1.2494(0.166-9.4049)   |
| CALCULUS, CONJUNCTIVA                                      | 0                                       | 0          | 11                                         | 2.9764        | 0(0-Inf)               |
| CALCULUS, CYSTIC DUCT                                      | 4                                       | 34.0566    | 39                                         | 9.6689        | 3.5223(1.2491-9.9324)  |
| CALCULUS, DENTAL                                           | 11                                      | 89.3708    | 330                                        | 118.7607      | 0.7525(0.4121-1.3741)  |
| CALCULUS, EPIDIDYMIS                                       | 0                                       | 0          | 1                                          | 0.2729        | 0(0-Inf)               |
| CALCULUS, GALLBLADDER                                      | 1                                       | 6.9403     | 36                                         | 9.1988        | 0.7545(0.103-5.5273)   |
| CALCULUS, GENITAL MALE NEC                                 | 0                                       | 0          | 2                                          | 1.0782        | 0(0-Inf)               |
| CALCULUS, HEPATIC DUCT                                     | 0                                       | 0          | 5                                          | 1.2695        | 0(0-Inf)               |
| CALCULUS, INTESTINE                                        | 0                                       | 0          | 1                                          | 0.3526        | 0(0-Inf)               |
| CALCULUS, KIDNEY, SEE ALSO CALCULUS, RENAL                 | 2                                       | 13.8479    | 24                                         | 6.3355        | 2.1858(0.5127-9.318)   |
| CALCULUS, LACRIMAL APPARATUS OR GLAND                      | 0                                       | 0          | 2                                          | 0.631         | 0(0-Inf)               |
| CALCULUS, LIVER                                            | 0                                       | 0          | 1                                          | 0.398         | 0(0-Inf)               |

| Description                                                       | No. of Positive Cases with Disease Code | Case Rate* | No. of Positive Controls with Disease Code | Control Rate* | Relative Risk (95%CI)  |
|-------------------------------------------------------------------|-----------------------------------------|------------|--------------------------------------------|---------------|------------------------|
| CALCULUS, PANCREAS                                                | 0                                       | 0          | 2                                          | 0.432         | 0(0-Inf)               |
| CALCULUS, PAROTID GLAND                                           | 0                                       | 0          | 12                                         | 3.6541        | 0(0-Inf)               |
| CALCULUS, PROSTATIC                                               | 2                                       | 32.2204    | 47                                         | 35.0761       | 0.9186(0.2225-3.7918)  |
| CALCULUS, RENAL, ACTIVE                                           | 1                                       | 8.6383     | 39                                         | 10.7901       | 0.8006(0.1096-5.8459)  |
| CALCULUS, RENAL, CALCIUM OXALATE                                  | 7                                       | 53.9072    | 151                                        | 39.0794       | 1.3794(0.6451-2.9499)  |
| CALCULUS, RENAL, CYSTINE                                          | 0                                       | 0          | 1                                          | 0.2354        | 0(0-Inf)               |
| CALCULUS, RENAL, IMPACTED                                         | 0                                       | 0          | 9                                          | 3.668         | 0(0-Inf)               |
| CALCULUS, RENAL, NOS                                              | 23                                      | 168.7155   | 441                                        | 111.7027      | 1.5104(0.9917-2.3004)  |
| CALCULUS, RENAL, STAGHORN                                         | 1                                       | 6.9421     | 9                                          | 2.1613        | 3.212(0.3996-25.8153)  |
| CALCULUS, RENAL, URATE (URIC ACID)                                | 1                                       | 6.8877     | 42                                         | 11.502        | 0.5988(0.0822-4.3632)  |
| CALCULUS, SALIVARY DUCT OR GLAND                                  | 1                                       | 7.4578     | 24                                         | 7.412         | 1.0062(0.1353-7.4837)  |
| CALCULUS, STENSEN'S DUCT                                          | 0                                       | 0          | 7                                          | 1.9428        | 0(0-Inf)               |
| CALCULUS, STOMACH                                                 | 0                                       | 0          | 1                                          | 0.8877        | 0(0-Inf)               |
| CALCULUS, SUBMANDIBULAR GLAND                                     | 0                                       | 0          | 26                                         | 6.0606        | 0(0-Inf)               |
| CALCULUS, SUBMAXILLARY DUCT OR GLAND                              | 0                                       | 0          | 6                                          | 1.6099        | 0(0-Inf)               |
| CALCULUS, TEETH                                                   | 0                                       | 0          | 23                                         | 6.1871        | 0(0-Inf)               |
| CALCULUS, TONSIL                                                  | 0                                       | 0          | 28                                         | 8.0012        | 0(0-Inf)               |
| CALCULUS, URETERAL                                                | 11                                      | 77.7384    | 290                                        | 75.2017       | 1.0337(0.5653-1.8903)  |
| CALCULUS, URETERAL, TYPE SPECIFIED                                | 3                                       | 23.0937    | 39                                         | 9.8577        | 2.3427(0.7197-7.6255)  |
| CALCULUS, URETEROVESICAL (JUNCTION)                               | 0                                       | 0          | 38                                         | 12.728        | 0(0-Inf)               |
| CALCULUS, URETHRAL, CALCIUM OXALATE                               | 0                                       | 0          | 11                                         | 2.8754        | 0(0-Inf)               |
| CALCULUS, URETHRAL, NOS                                           | 1                                       | 10.5092    | 16                                         | 8.6391        | 1.2165(0.1604-9.2239)  |
| CALCULUS, URINARY, CALCIUM OXALATE                                | 5                                       | 36.6553    | 80                                         | 20.6314       | 1.7767(0.7174-4.4002)  |
| CALCULUS, URINARY, CYSTINE                                        | 0                                       | 0          | 1                                          | 0.2354        | 0(0-Inf)               |
| CALCULUS, URINARY, NOS                                            | 9                                       | 65.9328    | 214                                        | 65.0545       | 1.0135(0.5193-1.9781)  |
| CALCULUS, URINARY, URATE (URIC ACID)                              | 1                                       | 7.486      | 20                                         | 6.5405        | 1.1446(0.1528-8.5753)  |
| CALCULUS, VESICAL, SEE ALSO CALCULUS, BLADDER                     | 2                                       | 15.4256    | 21                                         | 7.0752        | 2.1802(0.5073-9.3695)  |
| CALCULUS, WHARTON'S DUCT                                          | 0                                       | 0          | 9                                          | 2.1533        | 0(0-Inf)               |
| CALIECTASIS                                                       | 0                                       | 0          | 1                                          | 0.4751        | 0(0-Inf)               |
| CALLOSITY                                                         | 30                                      | 263.8724   | 572                                        | 226.0858      | 1.1671(0.8075-1.6869)  |
| CALLUS, BONE                                                      | 0                                       | 0          | 12                                         | 3.5835        | 0(0-Inf)               |
| CALLUS, NOS                                                       | 71                                      | 622.381    | 1537                                       | 578.9274      | 1.0751(0.8469-1.3647)  |
| CALLUS, VOCAL CORD/LARYNX                                         | 0                                       | 0          | 4                                          | 1.1418        | 0(0-Inf)               |
| CAMPBELL DE MORGAN'S SPOTS (CHERRY ANGIOMAS)                      | 1                                       | 7.5511     | 4                                          | 0.8641        | 8.7388(0.9424-81.0318) |
| CAMPTODACTYLY                                                     | 0                                       | 0          | 3                                          | 0.746         | 0(0-Inf)               |
| CANALICULITIS, ACUTE                                              | 0                                       | 0          | 3                                          | 0.6548        | 0(0-Inf)               |
| CANCER, (SEE ALSO CARCINOMA) CODE ALSO NEOPLASM MALIGNANT BY SITE | 130                                     | 1440.26    | 2915                                       | 1615.8794     | 0.8913(0.7474-1.063)   |
| CANCER, DISSEMINATED                                              | 0                                       | 0          | 2                                          | 0.7896        | 0(0-Inf)               |
| CANCERPHOBIA                                                      | 0                                       | 0          | 16                                         | 3.6543        | 0(0-Inf)               |

| Description                                                       | No. of Positive Cases with Disease Code | Case Rate* | No. of Positive Controls with Disease Code | Control Rate* | Relative Risk (95%CI)   |
|-------------------------------------------------------------------|-----------------------------------------|------------|--------------------------------------------|---------------|-------------------------|
| CANDIDATE FOR TRANSPLANT, BONE MARROW                             | 0                                       | 0          | 4                                          | 1.03          | 0(0-Inf)                |
| CANDIDATE FOR TRANSPLANT, HEART                                   | 0                                       | 0          | 2                                          | 0.4853        | 0(0-Inf)                |
| CANDIDATE FOR TRANSPLANT, KIDNEY                                  | 2                                       | 13.8513    | 18                                         | 4.8966        | 2.8288(0.6507-12.2976)  |
| CANDIDATE FOR TRANSPLANT, LIVER                                   | 1                                       | 8.8527     | 2                                          | 0.4498        | 19.6797(1.6981-228.068) |
| CANDIDATE FOR TRANSPLANT, LUNG                                    | 0                                       | 0          | 3                                          | 0.7174        | 0(0-Inf)                |
| CANDIDATE FOR TRANSPLANT, NEC                                     | 1                                       | 7.0308     | 8                                          | 1.9642        | 3.5795(0.4403-29.1023)  |
| CANDIDIASIS SEE ALSO MONILIASIS                                   | 15                                      | 153.4567   | 346                                        | 179.7807      | 0.8536(0.5084-1.4332)   |
| CANKER SORE                                                       | 0                                       | 0          | 48                                         | 12.113        | 0(0-Inf)                |
| CAPILLARITIS                                                      | 0                                       | 0          | 4                                          | 0.9157        | 0(0-Inf)                |
| CAPSULITIS, ADHESIVE, SHOULDER                                    | 14                                      | 98.8876    | 496                                        | 125.1012      | 0.7905(0.4641-1.3463)   |
| CAPSULITIS, NOS                                                   | 3                                       | 21.4075    | 85                                         | 19.996        | 1.0706(0.3373-3.3976)   |
| CAPSULITIS, SCAPULOHUMERAL, ADHESIVE                              | 0                                       | 0          | 2                                          | 1.6541        | 0(0-Inf)                |
| CAPSULITIS, SHOULDER, NOS                                         | 0                                       | 0          | 11                                         | 5.1279        | 0(0-Inf)                |
| CARBUNCLE, ARM, UPPER                                             | 0                                       | 0          | 1                                          | 0.234         | 0(0-Inf)                |
| CARBUNCLE, AXILLA                                                 | 0                                       | 0          | 2                                          | 0.6774        | 0(0-Inf)                |
| CARBUNCLE, BUTTOCK                                                | 0                                       | 0          | 6                                          | 1.6877        | 0(0-Inf)                |
| CARBUNCLE, EXTREMITY, LOWER                                       | 1                                       | 11.9758    | 8                                          | 2.5629        | 4.6728(0.5759-37.9127)  |
| CARBUNCLE, EXTREMITY, UPPER, NEC                                  | 0                                       | 0          | 2                                          | 0.5709        | 0(0-Inf)                |
| CARBUNCLE, EYELID                                                 | 0                                       | 0          | 1                                          | 1.037         | 0(0-Inf)                |
| CARBUNCLE, FACE                                                   | 0                                       | 0          | 11                                         | 2.5532        | 0(0-Inf)                |
| CARBUNCLE, FOREARM                                                | 0                                       | 0          | 2                                          | 0.6778        | 0(0-Inf)                |
| CARBUNCLE, HEAD                                                   | 0                                       | 0          | 5                                          | 1.6983        | 0(0-Inf)                |
| CARBUNCLE, NOS, SEE ALSO BOIL/FURUNCLE                            | 1                                       | 6.9367     | 39                                         | 10.0569       | 0.6897(0.0944-5.0397)   |
| CARBUNCLE, SCALP                                                  | 0                                       | 0          | 2                                          | 0.6309        | 0(0-Inf)                |
| CARCINOID, NOS, CODE ALSO NEOPLASM, MALIGNANT BY SITE             | 1                                       | 9.0283     | 31                                         | 13.2965       | 0.679(0.0923-4.9933)    |
| CARCINOMA, ACINIC CELL, CODE ALSO NEOPLASM MALIGNANT BY SITE--CAC | 25                                      | 492.2599   | 325                                        | 306.6111      | 1.6055(1.0676-2.4143)   |
| CARCINOMA, ADENO, CODE ALSO NEOPLASM, MALIGNANT BY SITE--ADCA     | 113                                     | 1028.682   | 2392                                       | 968.9181      | 1.0617(0.8786-1.2829)   |
| CARCINOMA, ADENOID CYSTIC, CODE ALSO NEOPLASM MALIGNANT BY SITE   | 1                                       | 6.9336     | 9                                          | 2.3083        | 3.0038(0.3747-24.0775)  |
| CARCINOMA, ADENOID, CODE ALSO NEOPLASM MALIGNANT BY SITE          | 2                                       | 16.6859    | 18                                         | 6.8715        | 2.4283(0.5589-10.5494)  |
| CARCINOMA, ADNEXAL, CODE ALSO NEOPLASM, MALIGNANT BY SITE         | 0                                       | 0          | 2                                          | 0.4708        | 0(0-Inf)                |
| CARCINOMA, ALVEOLAR CELL, CODE ALSO NEOPLASM MALIGNANT BY SITE    | 2                                       | 15.5648    | 39                                         | 13.0144       | 1.196(0.2873-4.9784)    |
| CARCINOMA, ANAPLASTIC, CODE ALSO NEOPLASM, MALIGNANT BY SITE      | 0                                       | 0          | 5                                          | 1.2714        | 0(0-Inf)                |

| Description                                                                 | No. of Positive Cases with Disease Code | Case Rate* | No. of Positive Controls with Disease Code | Control Rate* | Relative Risk (95%CI)  |
|-----------------------------------------------------------------------------|-----------------------------------------|------------|--------------------------------------------|---------------|------------------------|
| CARCINOMA, BASAL CELL, CODE ALSO NEOPLASM MALIGNANT BY SITE--BACA           | 104                                     | 960.5083   | 2292                                       | 918.4243      | 1.0458(0.8588-1.2736)  |
| CARCINOMA, BASALOID, CODE ALSO NEOPLASM MALIGNANT BY SITE                   | 1                                       | 6.9428     | 7                                          | 1.7588        | 3.9474(0.4759-32.7431) |
| CARCINOMA, BASOSQUAMOUS, CODE ALSO NEOPLASM MALIGNANT BY SITE               | 3                                       | 37.1586    | 47                                         | 31.6827       | 1.1728(0.3639-3.7801)  |
| CARCINOMA, BRONCHIOLAR, CODE ALSO NEOPLASM MALIGNANT BY SITE                | 2                                       | 15.625     | 33                                         | 11.0882       | 1.4091(0.3361-5.9078)  |
| CARCINOMA, BRONCHOGENIC, CODE ALSO NEOPLASM MALIGNANT BY SITE               | 1                                       | 9.635      | 56                                         | 26.5192       | 0.3633(0.0502-2.63)    |
| CARCINOMA, CHROMOPHOBE CELL, CODE ALSO BY SITE                              | 0                                       | 0          | 4                                          | 0.9707        | 0(0-Inf)               |
| CARCINOMA, CLEAR CELL, CODE ALSO NEOPLASM, MALIGNANT BY SITE                | 6                                       | 52.8985    | 50                                         | 20.6028       | 2.5675(1.0954-6.0184)  |
| CARCINOMA, CLOACOGENIC, CODE ALSO NEOPLASM MALIGNANT BY SITE                | 0                                       | 0          | 1                                          | 0.234         | 0(0-Inf)               |
| CARCINOMA, COLLOID, CODE ALSO NEOPLASM, MALIGNANT BY SITE                   | 1                                       | 8.1239     | 20                                         | 7.2652        | 1.1182(0.149-8.3932)   |
| CARCINOMA, COMEDOCARCINOMA, CODE ALSO NEOPLASM MALIGNANT BY SITE (BREAST #) | 0                                       | 0          | 37                                         | 17.1519       | 0(0-Inf)               |
| CARCINOMA, CRIBRIFORM, CODE ALSO NEOPLASM MALIGNANT BY SITE                 | 2                                       | 15.2991    | 18                                         | 5.7875        | 2.6435(0.6064-11.5242) |
| CARCINOMA, CYSTIC, CODE ALSO NEOPLASM, MALIGNANT BY SITE                    | 5                                       | 38.9673    | 39                                         | 13.1133       | 2.9716(1.1634-7.5902)  |
| CARCINOMA, DIFFUSE, CODE ALSO NEOPLASM MALIGNANT BY SITE                    | 0                                       | 0          | 14                                         | 5.2436        | 0(0-Inf)               |
| CARCINOMA, DUCTAL, CODE ALSO NEOPLASM, MALIGNANT BY SITE                    | 19                                      | 134.8992   | 648                                        | 165.9358      | 0.813(0.5145-1.2846)   |
| CARCINOMA, EMBRYONAL, CODE ALSO NEOPLASM, MALIGNANT BY SITE                 | 0                                       | 0          | 1                                          | 0.4751        | 0(0-Inf)               |
| CARCINOMA, ENDOMETRIAL, CODE ALSO NEOPLASM MALIGNANT BY SITE                | 2                                       | 27.609     | 48                                         | 23.4295       | 1.1784(0.2848-4.8755)  |
| CARCINOMA, EPIDERMOID, CODE ALSO NEOPLASM, MALIGNANT BY SITE                | 0                                       | 0          | 1                                          | 0.3526        | 0(0-Inf)               |
| CARCINOMA, FOLLICULAR, CODE ALSO NEOPLASM, MALIGNANT BY SITE                | 3                                       | 25.8819    | 14                                         | 5.5963        | 4.6248(1.3133-16.2859) |
| CARCINOMA, GIANT CELL, CODE ALSO NEOPLASM, MALIGNANT BY SITE                | 0                                       | 0          | 1                                          | 0.2729        | 0(0-Inf)               |
| CARCINOMA, GLANDULAR, CODE ALSO NEOPLASM, MALIGNANT BY SITE                 | 0                                       | 0          | 3                                          | 2.0479        | 0(0-Inf)               |

| Description                                                                    | No. of Positive Cases with Disease Code | Case Rate* | No. of Positive Controls with Disease Code | Control Rate* | Relative Risk (95%CI) |
|--------------------------------------------------------------------------------|-----------------------------------------|------------|--------------------------------------------|---------------|-----------------------|
| CARCINOMA, GRANULAR CELL, CODE ALSO NEOPLASM MALIGNANT BY SITE                 | 0                                       | 0          | 4                                          | 2.7552        | 0(0-Inf)              |
| CARCINOMA, HEPATOCELLULAR, CODE ALSO NEOPLASM, MALIGNANT BY SITE (LIVER #)     | 4                                       | 48.6879    | 22                                         | 14.4216       | 3.376(1.1559-9.8608)  |
| CARCINOMA, HURTHLE CELL, BENIGN, CODE ALSO NEOPLASM BENIGN BY SITE (THYROID #) | 0                                       | 0          | 2                                          | 0.4681        | 0(0-Inf)              |
| CARCINOMA, HURTHLE CELL, CODE ALSO NEOPLASM MALIGNANT BY SITE                  | 0                                       | 0          | 6                                          | 1.5037        | 0(0-Inf)              |
| CARCINOMA, IN SITU, CODE ALSO NEOPLASM, MALIGNANT BY SITE-- CIS                | 39                                      | 352.5061   | 964                                        | 401.9971      | 0.8769(0.6362-1.2087) |
| CARCINOMA, INFLAMMATORY, CODE ALSO NEOPLASM MALIGNANT BY SITE                  | 0                                       | 0          | 9                                          | 2.1194        | 0(0-Inf)              |
| CARCINOMA, INTRAEPITHELIAL, CODE ALSO NEOPLASM MALIGNANT BY SITE               | 0                                       | 0          | 1                                          | 0.2354        | 0(0-Inf)              |
| CARCINOMA, INVASIVE, CODE ALSO NEOPLASM MALIGNANT BY SITE--CINV                | 64                                      | 559.8443   | 1193                                       | 456.8257      | 1.2255(0.9522-1.5772) |
| CARCINOMA, KERATINIZING, CODE ALSO NEOPLASM MALIGNANT BY SITE                  | 1                                       | 8.8876     | 39                                         | 16.3505       | 0.5436(0.0744-3.9688) |
| CARCINOMA, LARGE CELL, CODE ALSO NEOPLASM MALIGNANT BY SITE                    | 1                                       | 9.268      | 16                                         | 7.1901        | 1.289(0.1698-9.783)   |
| CARCINOMA, LOBULAR, CODE ALSO NEOPLASM, MALIGNANT BY SITE                      | 8                                       | 113.1257   | 126                                        | 65.3205       | 1.7319(0.8442-3.5529) |
| CARCINOMA, MEDULLARY, CODE ALSO NEOPLASM, MALIGNANT BY SITE                    | 0                                       | 0          | 13                                         | 2.8858        | 0(0-Inf)              |
| CARCINOMA, METACHRONOUS, CODE ALSO NEOPLASM MALIGNANT BY SITE                  | 0                                       | 0          | 6                                          | 3.486         | 0(0-Inf)              |
| CARCINOMA, MICROINVASIVE, CODE ALSO NEOPLASM MALIGNANT BY SITE                 | 1                                       | 7.7877     | 19                                         | 6.3404        | 1.2283(0.1632-9.2462) |
| CARCINOMA, MIXED, CODE ALSO NEOPLASM, MALIGNANT BY SITE                        | 1                                       | 7.2193     | 26                                         | 7.4245        | 0.9724(0.1311-7.2103) |
| CARCINOMA, MORPHEAFORM, CODE ALSO NEOPLASM MALIGNANT BY SITE                   | 8                                       | 77.5552    | 231                                        | 110.061       | 0.7047(0.3477-1.428)  |
| CARCINOMA, MUCINOUS, CODE ALSO NEOPLASM, MALIGNANT BY SITE                     | 11                                      | 87.2491    | 91                                         | 30.8206       | 2.8309(1.5073-5.3166) |
| CARCINOMA, MUCO-EPIDERMOID, CODE ALSO NEOPLASM MALIGNANT BY SITE               | 0                                       | 0          | 4                                          | 0.9708        | 0(0-Inf)              |
| CARCINOMA, NEUROENDOCRINE, CODE ALSO NEOPLASM MALIGNANT BY SITE                | 0                                       | 0          | 13                                         | 6.3729        | 0(0-Inf)              |
| CARCINOMA, NOS, CODE ALSO NEOPLASM MALIGNANT BY SITE-CA                        | 75                                      | 749.8904   | 1722                                       | 841.8894      | 0.8907(0.7064-1.1231) |

| Description                                                                                  | No. of Positive Cases with Disease Code | Case Rate* | No. of Positive Controls with Disease Code | Control Rate* | Relative Risk (95%CI) |
|----------------------------------------------------------------------------------------------|-----------------------------------------|------------|--------------------------------------------|---------------|-----------------------|
| CARCINOMA, OAT CELL, CODE ALSO NEOPLASM, MALIGNANT BY SITE                                   | 0                                       | 0          | 1                                          | 0.4048        | 0(0-Inf)              |
| CARCINOMA, OBSTRUCTING, CODE ALSO NEOPLASM MALIGNANT BY SITE (CODE ALSO OBSTRUCTION BY SITE) | 0                                       | 0          | 20                                         | 9.7702        | 0(0-Inf)              |
| CARCINOMA, OCCULT, CODE ALSO NEOPLASM, MALIGNANT BY SITE                                     | 0                                       | 0          | 12                                         | 3.1648        | 0(0-Inf)              |
| CARCINOMA, PAPILLARY, CODE ALSO NEOPLASM, MALIGNANT BY SITE--CPAP                            | 21                                      | 169.443    | 260                                        | 90.9776       | 1.8625(1.1913-2.9117) |
| CARCINOMA, PERFORATING, CODE ALSO NEOPLASM MALIGNANT BY SITE (CODE ALSO PERFORATION BY SITE) | 1                                       | 7.4947     | 22                                         | 7.317         | 1.0243(0.1374-7.6338) |
| CARCINOMA, RECURRENT, CODE ALSO NEOPLASM MALIGNANT BY SITE(S)--RECA                          | 22                                      | 238.6803   | 548                                        | 305.063       | 0.7824(0.5105-1.1992) |
| CARCINOMA, RENAL CELL (KIDNEY)                                                               | 8                                       | 78.0324    | 124                                        | 59.3143       | 1.3156(0.6422-2.695)  |
| CARCINOMA, SARCOMATOID, CODE ALSO NEOPLASM MALIGNANT BY SITE                                 | 0                                       | 0          | 3                                          | 0.7884        | 0(0-Inf)              |
| CARCINOMA, SCIRRHOUS, CODE ALSO NEOPLASM, MALIGNANT BY SITE                                  | 1                                       | 7.0739     | 34                                         | 7.5652        | 0.9351(0.1273-6.8708) |
| CARCINOMA, SEBACEOUS, CODE ALSO NEOPLASM MALIGNANT BY SITE                                   | 0                                       | 0          | 6                                          | 6.5256        | 0(0-Inf)              |
| CARCINOMA, SEROANAPLASTIC                                                                    | 0                                       | 0          | 1                                          | 0.234         | 0(0-Inf)              |
| CARCINOMA, SEROUS, CODE ALSO NEOPLASM MALIGNANT BY SITE                                      | 2                                       | 27.6454    | 36                                         | 17.7616       | 1.5565(0.372-6.5116)  |
| CARCINOMA, SIGNET RING CELL, CODE ALSO NEOPLASM MALIGNANT BY SITE                            | 0                                       | 0          | 22                                         | 8.6235        | 0(0-Inf)              |
| CARCINOMA, SMALL CELL, CODE ALSO NEOPLASM, MALIGNANT BY SITE                                 | 3                                       | 25.3179    | 70                                         | 26.9298       | 0.9401(0.2951-2.9955) |
| CARCINOMA, SOLID, CODE ALSO NEOPLASM, MALIGNANT BY SITE                                      | 1                                       | 7.5169     | 8                                          | 2.5107        | 2.994(0.3674-24.3954) |
| CARCINOMA, SPINDLE CELL, CODE ALSO NEOPLASM MALIGNANT BY SITE                                | 0                                       | 0          | 5                                          | 2.3432        | 0(0-Inf)              |
| CARCINOMA, SQUAMOUS CELL, CODE ALSO NEOPLASM MALIGNANT BY SITE --SQCA                        | 90                                      | 952.882    | 1897                                       | 964.0182      | 0.9884(0.7996-1.2219) |
| CARCINOMA, TRANSITIONAL CELL, CODE ALSO NEOPLASM MALIGNANT BY SITE--CTR                      | 11                                      | 120.204    | 231                                        | 129.7097      | 0.9267(0.5054-1.6992) |
| CARCINOMA, TUBULAR, CODE ALSO NEOPLASM, MALIGNANT BY SITE                                    | 0                                       | 0          | 5                                          | 1.2711        | 0(0-Inf)              |
| CARCINOMA, UNDIFFERENTIATED, CODE ALSO NEOPLASM MALIGNANT BY SITE                            | 0                                       | 0          | 27                                         | 10.061        | 0(0-Inf)              |
| CARCINOMA, VERRUCOUS, CODE ALSO NEOPLASM MALIGNANT BY SITE                                   | 2                                       | 17.7944    | 20                                         | 8.3831        | 2.1227(0.4924-9.1512) |



| Description                                                             | No. of Positive Cases with Disease Code | Case Rate* | No. of Positive Controls with Disease Code | Control Rate* | Relative Risk (95%CI)   |
|-------------------------------------------------------------------------|-----------------------------------------|------------|--------------------------------------------|---------------|-------------------------|
| CARCINOMA, VILLOUS, CODE ALSO NEOPLASM, MALIGNANT BY SITE               | 0                                       | 0          | 2                                          | 1.7812        | 0(0-Inf)                |
| CARCINOMATOSIS, MENINGEAL                                               | 0                                       | 0          | 2                                          | 0.7896        | 0(0-Inf)                |
| CARCINOMATOSIS, NOS, CODE ALSO NEOPLASM MALIGNANT SEC BY SITE IF STATED | 1                                       | 7.285      | 33                                         | 9.5941        | 0.7593(0.1033-5.5799)   |
| CARCINOSARCOMA CODE ALSO NEOPLASM MALIGNANT BY SITE                     | 0                                       | 0          | 2                                          | 0.432         | 0(0-Inf)                |
| CARDIOMEGALY, NOS                                                       | 5                                       | 40.5526    | 93                                         | 33.1729       | 1.2225(0.4954-3.0164)   |
| CARDIOMYOPATHY, ALCOHOLIC                                               | 0                                       | 0          | 11                                         | 3.0966        | 0(0-Inf)                |
| CARDIOMYOPATHY, AMYLOID                                                 | 2                                       | 33.9558    | 2                                          | 2.1003        | 16.167(2.2344-116.9767) |
| CARDIOMYOPATHY, CONGESTIVE                                              | 0                                       | 0          | 19                                         | 6.4695        | 0(0-Inf)                |
| CARDIOMYOPATHY, CONSTRICTIVE                                            | 0                                       | 0          | 2                                          | 1.8977        | 0(0-Inf)                |
| CARDIOMYOPATHY, DIABETIC                                                | 0                                       | 0          | 2                                          | 1.1972        | 0(0-Inf)                |
| CARDIOMYOPATHY, DILATED                                                 | 13                                      | 130.1783   | 338                                        | 169.3835      | 0.7685(0.4411-1.3389)   |
| CARDIOMYOPATHY, HYPERTENSIVE                                            | 2                                       | 25.6963    | 29                                         | 21.2256       | 1.2106(0.2876-5.0954)   |
| CARDIOMYOPATHY, HYPERTROPHIC                                            | 4                                       | 32.656     | 79                                         | 28.5299       | 1.1446(0.4177-3.1364)   |
| CARDIOMYOPATHY, IDIOPATHIC                                              | 2                                       | 14.7927    | 93                                         | 28.3817       | 0.5212(0.1281-2.1199)   |
| CARDIOMYOPATHY, ISCHEMIC                                                | 34                                      | 491.4398   | 569                                        | 462.2658      | 1.0631(0.7516-1.5037)   |
| CARDIOMYOPATHY, NONOBSTRUCTIVE                                          | 1                                       | 7.5244     | 5                                          | 1.6099        | 4.6738(0.5348-40.8415)  |
| CARDIOMYOPATHY, NOS                                                     | 21                                      | 231.8596   | 474                                        | 270.6124      | 0.8568(0.5529-1.3277)   |
| CARDIOMYOPATHY, RESTRICTIVE                                             | 1                                       | 10.5971    | 42                                         | 23.0638       | 0.4595(0.0631-3.3473)   |
| CARDIOMYOPATHY, SECONDARY                                               | 0                                       | 0          | 10                                         | 3.6022        | 0(0-Inf)                |
| CARDIOSPASM                                                             | 0                                       | 0          | 1                                          | 0.2729        | 0(0-Inf)                |
| CARDIOVERSION (ELECTRO)                                                 | 12                                      | 113.5565   | 228                                        | 104.3994      | 1.0877(0.6077-1.9468)   |
| CARDITIS, NOS                                                           | 0                                       | 0          | 2                                          | 0.5475        | 0(0-Inf)                |
| CAREER ASSESSMENT LAB                                                   | 0                                       | 0          | 9                                          | 2.3008        | 0(0-Inf)                |
| CARIES (DENTAL)                                                         | 81                                      | 606.4526   | 2139                                       | 608.0736      | 0.9973(0.7984-1.2458)   |
| CAROTIDYNIA                                                             | 2                                       | 13.8902    | 33                                         | 8.1225        | 1.7101(0.4075-7.1768)   |
| CAROTINEMIA                                                             | 0                                       | 0          | 9                                          | 2.044         | 0(0-Inf)                |
| CARRIER, AMEBIASIS (ENDAMEBA HISTOLYTICA)                               | 0                                       | 0          | 2                                          | 0.4709        | 0(0-Inf)                |
| CARRIER, DEFECTIVE GENE                                                 | 0                                       | 0          | 8                                          | 2.6442        | 0(0-Inf)                |
| CARRIER, HEMOPHILIA, SEE ALSO HEMOPHILIA                                | 0                                       | 0          | 1                                          | 0.4049        | 0(0-Inf)                |
| CARRIER, HEPATITIS, SERUM                                               | 0                                       | 0          | 5                                          | 1.3507        | 0(0-Inf)                |
| CARRIER, INFECTIVE ORGANISM, NEC                                        | 0                                       | 0          | 3                                          | 1.0731        | 0(0-Inf)                |
| CARRIER, SALMONELLA, NEC                                                | 0                                       | 0          | 1                                          | 0.2354        | 0(0-Inf)                |
| CARRIER, STAPHYLOCOCCI                                                  | 0                                       | 0          | 3                                          | 5.3083        | 0(0-Inf)                |
| CARUNCLE, LABIA                                                         | 0                                       | 0          | 1                                          | 0.398         | 0(0-Inf)                |
| CARUNCLE, LACRIMAL                                                      | 0                                       | 0          | 1                                          | 1.0366        | 0(0-Inf)                |
| CARUNCLE, URETHRAL                                                      | 4                                       | 59.0522    | 79                                         | 46.8459       | 1.2606(0.4597-3.457)    |
| CASCADE STOMACH                                                         | 0                                       | 0          | 1                                          | 0.8534        | 0(0-Inf)                |
| CATAPLEXY                                                               | 0                                       | 0          | 8                                          | 2.0534        | 0(0-Inf)                |

| Description                                                | No. of Positive Cases with Disease Code | Case Rate* | No. of Positive Controls with Disease Code | Control Rate* | Relative Risk (95%CI)    |
|------------------------------------------------------------|-----------------------------------------|------------|--------------------------------------------|---------------|--------------------------|
| CATARACT, AFTER                                            | 0                                       | 0          | 3                                          | 1.2104        | 0(0-Inf)                 |
| CATARACT, ANTERIOR SUBCAPSULAR POLAR                       | 0                                       | 0          | 1                                          | 0.2354        | 0(0-Inf)                 |
| CATARACT, BRUNESCENT                                       | 2                                       | 30.1754    | 21                                         | 19.7395       | 1.5287(0.3568-6.5492)    |
| CATARACT, CONGENITAL                                       | 0                                       | 0          | 18                                         | 4.2937        | 0(0-Inf)                 |
| CATARACT, CORTICAL                                         | 1                                       | 9.0352     | 21                                         | 9.0248        | 1.0011(0.1339-7.4847)    |
| CATARACT, DIABETIC                                         | 0                                       | 0          | 2                                          | 2.5429        | 0(0-Inf)                 |
| CATARACT, HYPERMATURE                                      | 0                                       | 0          | 3                                          | 0.961         | 0(0-Inf)                 |
| CATARACT, IMMATURE                                         | 2                                       | 18.8158    | 51                                         | 23.2247       | 0.8102(0.1966-3.3384)    |
| CATARACT, INCIPIENT                                        | 13                                      | 113.6123   | 449                                        | 180.6647      | 0.6289(0.3619-1.0927)    |
| CATARACT, INTUMESCENT                                      | 0                                       | 0          | 1                                          | 2.4991        | 0(0-Inf)                 |
| CATARACT, MATURE                                           | 0                                       | 0          | 19                                         | 8.0412        | 0(0-Inf)                 |
| CATARACT, MORGAGNIAN                                       | 0                                       | 0          | 1                                          | 0.8881        | 0(0-Inf)                 |
| CATARACT, NEC                                              | 0                                       | 0          | 16                                         | 8.2835        | 0(0-Inf)                 |
| CATARACT, NON-SENILE NOS                                   | 3                                       | 27.1844    | 23                                         | 9.8779        | 2.7521(0.8196-9.2408)    |
| CATARACT, NOS--CAT                                         | 323                                     | 7501.314   | 7416                                       | 8135.5581     | 0.922(0.8247-1.0309)     |
| CATARACT, NUCLEAR                                          | 6                                       | 54.6074    | 114                                        | 49.3267       | 1.1071(0.4858-2.5226)    |
| CATARACT, POST-CAPSULAR                                    | 1                                       | 14.9256    | 3                                          | 2.6378        | 5.6583(0.578-55.3882)    |
| CATARACT, POSTERIOR SUBCAPSULAR POLAR                      | 0                                       | 0          | 6                                          | 1.8817        | 0(0-Inf)                 |
| CATARACT, POST-SUBCAPSULAR                                 | 5                                       | 35.1534    | 128                                        | 34.3179       | 1.0243(0.4181-2.5098)    |
| CATARACT, SECONDARY                                        | 1                                       | 7.2194     | 2                                          | 0.4643        | 15.5504(1.3419-180.1983) |
| CATARACT, SENILE                                           | 25                                      | 287.815    | 424                                        | 255.451       | 1.1267(0.7518-1.6885)    |
| CATARACT, SENILE NEC                                       | 0                                       | 0          | 1                                          | 0.4049        | 0(0-Inf)                 |
| CATARACT, SENILE, POSTERIOR SUBCAPSULAR POLAR              | 0                                       | 0          | 1                                          | 0.2729        | 0(0-Inf)                 |
| CATARACT, STEROID ( CODE ALSO EFFECT, ADVERSE STEROID NEC) | 0                                       | 0          | 7                                          | 1.6021        | 0(0-Inf)                 |
| CATARACT, SUBLUXATED                                       | 0                                       | 0          | 1                                          | 0.2729        | 0(0-Inf)                 |
| CATARACT, TRAUMATIC                                        | 1                                       | 6.9122     | 17                                         | 4.4328        | 1.5593(0.2059-11.8071)   |
| CATASTROPHIC ABDOMEN (NON-TRAUMATIC)                       | 0                                       | 0          | 1                                          | 0.8527        | 0(0-Inf)                 |
| CATATONIA                                                  | 0                                       | 0          | 3                                          | 0.9608        | 0(0-Inf)                 |
| CAUSALGIA                                                  | 0                                       | 0          | 18                                         | 4.3564        | 0(0-Inf)                 |
| CAVOVARUS NOS                                              | 0                                       | 0          | 1                                          | 0.234         | 0(0-Inf)                 |
| CAVUS, FOOT, ACQUIRED                                      | 0                                       | 0          | 10                                         | 2.4273        | 0(0-Inf)                 |
| CAVUS, FOOT, NOS                                           | 0                                       | 0          | 13                                         | 3.8461        | 0(0-Inf)                 |
| CELLOPHANED, MACULAR                                       | 6                                       | 51.209     | 62                                         | 24.0812       | 2.1265(0.9154-4.9402)    |
| CELLULES (RENAL BILATERAL)                                 | 8                                       | 114.2265   | 74                                         | 57.9153       | 1.9723(0.9491-4.0985)    |
| CELLULITIS, ARM                                            | 11                                      | 87.9       | 226                                        | 78.8062       | 1.1154(0.6078-2.047)     |
| CELLULITIS, AUDITORY CANAL (EXTERNAL)                      | 0                                       | 0          | 7                                          | 2.0568        | 0(0-Inf)                 |
| CELLULITIS, AXILLA                                         | 0                                       | 0          | 8                                          | 1.7968        | 0(0-Inf)                 |
| CELLULITIS, CERVICAL REGION                                | 1                                       | 7.0054     | 3                                          | 0.8044        | 8.7088(0.8747-86.704)    |
| CELLULITIS, CHEEK, INNER                                   | 0                                       | 0          | 4                                          | 1.0353        | 0(0-Inf)                 |

| Description                                   | No. of Positive Cases with Disease Code | Case Rate* | No. of Positive Controls with Disease Code | Control Rate* | Relative Risk (95%CI) |
|-----------------------------------------------|-----------------------------------------|------------|--------------------------------------------|---------------|-----------------------|
| CELLULITIS, EAR, EXTERNAL                     | 4                                       | 27.8126    | 124                                        | 30.392        | 0.9151(0.3372-2.4836) |
| CELLULITIS, EYELID                            | 0                                       | 0          | 40                                         | 9.6976        | 0(0-Inf)              |
| CELLULITIS, FACE                              | 7                                       | 48.8637    | 203                                        | 51.6749       | 0.9456(0.4442-2.0131) |
| CELLULITIS, FINGER                            | 6                                       | 42.6858    | 233                                        | 55.8479       | 0.7643(0.3393-1.7218) |
| CELLULITIS, FOOT                              | 21                                      | 160.9786   | 332                                        | 107.2913      | 1.5004(0.9636-2.3362) |
| CELLULITIS, FOREARM                           | 4                                       | 29.3063    | 93                                         | 27.6738       | 1.059(0.388-2.8903)   |
| CELLULITIS, HAND                              | 13                                      | 98.014     | 168                                        | 52.8379       | 1.855(1.052-3.2709)   |
| CELLULITIS, HIP                               | 0                                       | 0          | 9                                          | 6.2847        | 0(0-Inf)              |
| CELLULITIS, LEG                               | 48                                      | 414.6707   | 889                                        | 342.9562      | 1.2091(0.9034-1.6182) |
| CELLULITIS, MOUTH                             | 0                                       | 0          | 19                                         | 4.6899        | 0(0-Inf)              |
| CELLULITIS, NOS, SEE ALSO ABSCESS             | 73                                      | 657.5093   | 1592                                       | 654.0876      | 1.0052(0.7945-1.2719) |
| CELLULITIS, NOSE, EXTERNAL                    | 4                                       | 29.3284    | 77                                         | 18.4918       | 1.586(0.5781-4.3511)  |
| CELLULITIS, ORBITAL                           | 1                                       | 7.0433     | 29                                         | 7.0561        | 0.9982(0.1353-7.3659) |
| CELLULITIS, PALATE, SOFT                      | 0                                       | 0          | 3                                          | 1.4261        | 0(0-Inf)              |
| CELLULITIS, PELVIS, FEMALE, ACUTE             | 0                                       | 0          | 1                                          | 0.398         | 0(0-Inf)              |
| CELLULITIS, PERINEUM                          | 0                                       | 0          | 4                                          | 1.0711        | 0(0-Inf)              |
| CELLULITIS, PERIORBITAL                       | 5                                       | 42.9077    | 40                                         | 15.7339       | 2.7271(1.0691-6.9562) |
| CELLULITIS, RECURRENT                         | 2                                       | 18.7104    | 56                                         | 25.3095       | 0.7393(0.1799-3.0386) |
| CELLULITIS, SCALP                             | 0                                       | 0          | 16                                         | 3.9151        | 0(0-Inf)              |
| CELLULITIS, TOE                               | 14                                      | 120.8663   | 297                                        | 116.9109      | 1.0338(0.6039-1.7698) |
| CELLULITIS, TRAUMATIC                         | 11                                      | 87.8959    | 257                                        | 89.7093       | 0.9798(0.5349-1.7947) |
| CELLULITIS, TRUNK                             | 2                                       | 14.7244    | 87                                         | 26.0465       | 0.5653(0.1388-2.3023) |
| CELLULITIS, WRIST                             | 1                                       | 6.9788     | 27                                         | 7.1671        | 0.9737(0.1316-7.2059) |
| CEMENTOMA                                     | 0                                       | 0          | 1                                          | 0.234         | 0(0-Inf)              |
| CEPHALGIA (SEE ALSO HEADACHE)                 | 3                                       | 24.1116    | 77                                         | 27.1753       | 0.8873(0.2791-2.821)  |
| CERUMEN IN EAR CANAL                          | 105                                     | 856.3073   | 2546                                       | 837.091       | 1.023(0.8411-1.2442)  |
| CERVICAL, INTRAEPITHELIAL NEOPLASIA (CIN)     | 0                                       | 0          | 1                                          | 0.234         | 0(0-Inf)              |
| CERVICAL, RIB                                 | 0                                       | 0          | 8                                          | 3.1981        | 0(0-Inf)              |
| CERVICITIS, ACUTE                             | 0                                       | 0          | 16                                         | 7.2366        | 0(0-Inf)              |
| CERVICITIS, CHRONIC                           | 24                                      | 336.7315   | 1026                                       | 311.0949      | 1.0824(0.7216-1.6235) |
| CERVICITIS, CHRONIC CYSTIC                    | 1                                       | 29.709     | 119                                        | 71.9439       | 0.4129(0.0576-2.959)  |
| CERVICITIS, CYSTIC                            | 0                                       | 0          | 47                                         | 34.5979       | 0(0-Inf)              |
| CERVICITIS, NOS                               | 1                                       | 24.3944    | 68                                         | 36.2515       | 0.6729(0.0932-4.8567) |
| CERVICITIS, NOS, WITH ULCERATION              | 0                                       | 0          | 2                                          | 0.5838        | 0(0-Inf)              |
| CERVICITIS, TRICHOMONAL                       | 0                                       | 0          | 5                                          | 1.1157        | 0(0-Inf)              |
| CESAREAN SECTION, CURRENT DELIVERY            | 0                                       | 0          | 12                                         | 14.5655       | 0(0-Inf)              |
| CESAREAN SECTION, PRIOR (HISTORY OF)          | 0                                       | 0          | 7                                          | 1.8505        | 0(0-Inf)              |
| CESAREAN SECTION, PRIOR, AND CURRENT DELIVERY | 0                                       | 0          | 5                                          | 2.2889        | 0(0-Inf)              |
| CHAFING                                       | 0                                       | 0          | 1                                          | 0.2729        | 0(0-Inf)              |
| CHALASIA (ESOPHAGUS)                          | 0                                       | 0          | 2                                          | 0.6309        | 0(0-Inf)              |

| Description                                                         | No. of Positive Cases with Disease Code | Case Rate* | No. of Positive Controls with Disease Code | Control Rate* | Relative Risk (95%CI)  |
|---------------------------------------------------------------------|-----------------------------------------|------------|--------------------------------------------|---------------|------------------------|
| CHALAZION                                                           | 44                                      | 336.8877   | 695                                        | 170.7394      | 1.9731(1.4528-2.6797)  |
| CHANGES, ACTINIC, SKIN                                              | 8                                       | 59.1064    | 280                                        | 85.7538       | 0.6893(0.3409-1.3938)  |
| CHANGES, ANTERIOR MEMBRANE                                          | 0                                       | 0          | 1                                          | 0.4049        | 0(0-Inf)               |
| CHANGES, BONE, UNKNOWN CAUSE                                        | 0                                       | 0          | 4                                          | 1.5795        | 0(0-Inf)               |
| CHANGES, BOWEL HABITS                                               | 25                                      | 221.4653   | 536                                        | 215.9431      | 1.0256(0.686-1.5333)   |
| CHANGES, CARDIOVASCULAR                                             | 0                                       | 0          | 1                                          | 0.4751        | 0(0-Inf)               |
| CHANGES, CATARACTOUS                                                | 0                                       | 0          | 2                                          | 1.0788        | 0(0-Inf)               |
| CHANGES, CIRCULATORY                                                | 0                                       | 0          | 1                                          | 0.4048        | 0(0-Inf)               |
| CHANGES, CORNEAL MEMBRANE, NOS                                      | 1                                       | 7.0973     | 6                                          | 1.6275        | 4.361(0.5123-37.1248)  |
| CHANGES, CYSTIC, ENDOMETRIUM                                        | 0                                       | 0          | 7                                          | 1.5156        | 0(0-Inf)               |
| CHANGES, EYE, NEC                                                   | 0                                       | 0          | 31                                         | 12.8437       | 0(0-Inf)               |
| CHANGES, FATTY LIVER                                                | 0                                       | 0          | 7                                          | 1.8165        | 0(0-Inf)               |
| CHANGES, FIBROCYSTIC, BREAST                                        | 12                                      | 168.774    | 638                                        | 297.76        | 0.5668(0.3198-1.0045)  |
| CHANGES, HYPERTENSIVE, EYE                                          | 4                                       | 28.3928    | 39                                         | 10.8854       | 2.6083(0.9259-7.3479)  |
| CHANGES, HYPERTROPHIC, SPINE, SEE ALSO DISEASE, DEGENERATIVE, SPINE | 0                                       | 0          | 7                                          | 1.6619        | 0(0-Inf)               |
| CHANGES, JOINT                                                      | 1                                       | 6.9376     | 14                                         | 3.5003        | 1.982(0.2577-15.2461)  |
| CHANGES, LENS                                                       | 3                                       | 22.3003    | 67                                         | 20.4065       | 1.0928(0.3424-3.488)   |
| CHANGES, MACULAR PIGMENT                                            | 13                                      | 148.5194   | 227                                        | 137.3195      | 1.0816(0.6175-1.8945)  |
| CHANGES, MENTAL                                                     | 42                                      | 672.9056   | 520                                        | 507.3486      | 1.3263(0.9677-1.8178)  |
| CHANGES, POST RADIATION, SEE ALSO EFFECT ADVERSE                    | 0                                       | 0          | 18                                         | 5.9372        | 0(0-Inf)               |
| CHANGES, RETINA, PIGMENT (EPITHELIAL)                               | 3                                       | 35.8673    | 61                                         | 39.3005       | 0.9126(0.2857-2.9158)  |
| CHANGES, SENILE                                                     | 0                                       | 0          | 3                                          | 1.9789        | 0(0-Inf)               |
| CHANGES, SENILE, SEE ALSO PRESBY- OR AGING                          | 0                                       | 0          | 2                                          | 1.1619        | 0(0-Inf)               |
| CHANGES, SENSORY                                                    | 1                                       | 7.0162     | 20                                         | 5.3668        | 1.3073(0.1741-9.8163)  |
| CHANGES, VASCULAR                                                   | 0                                       | 0          | 10                                         | 2.6504        | 0(0-Inf)               |
| CHANGES, VASCULAR, RETINA                                           | 1                                       | 7.7416     | 6                                          | 2.0081        | 3.8551(0.4556-32.6226) |
| CHANGES, VASOMOTOR                                                  | 0                                       | 0          | 1                                          | 0.3526        | 0(0-Inf)               |
| CHANGES, VOICE                                                      | 3                                       | 25.3219    | 36                                         | 13.803        | 1.8345(0.5615-5.9933)  |
| CHAPPING SKIN                                                       | 1                                       | 6.9405     | 9                                          | 2.2427        | 3.0947(0.386-24.8102)  |
| CHEILITIS, ACTINIC                                                  | 8                                       | 68.2072    | 181                                        | 71.3291       | 0.9562(0.4702-1.9447)  |
| CHEILITIS, NOS                                                      | 6                                       | 47.209     | 186                                        | 62.9325       | 0.7502(0.3321-1.6945)  |
| CHEILOSIS, ANGULAR                                                  | 2                                       | 14.6757    | 34                                         | 10.0687       | 1.4576(0.3479-6.1062)  |
| CHEILOSIS, NOS                                                      | 0                                       | 0          | 18                                         | 6.7661        | 0(0-Inf)               |
| CHEIRALGIA                                                          | 0                                       | 0          | 2                                          | 0.6309        | 0(0-Inf)               |
| CHEIROPATHY DIABETIC                                                | 0                                       | 0          | 1                                          | 0.3526        | 0(0-Inf)               |
| CHELOID                                                             | 0                                       | 0          | 1                                          | 0.2729        | 0(0-Inf)               |
| CHEMOSIS                                                            | 1                                       | 7.1181     | 20                                         | 4.689         | 1.518(0.202-11.4072)   |
| CHEYNE-STOKES SEE ALSO RESPIRATION                                  | 0                                       | 0          | 3                                          | 2.6643        | 0(0-Inf)               |
| CHICKENPOX, NOS                                                     | 0                                       | 0          | 2                                          | 0.6775        | 0(0-Inf)               |

| Description                                            | No. of Positive Cases with Disease Code | Case Rate* | No. of Positive Controls with Disease Code | Control Rate* | Relative Risk (95%CI) |
|--------------------------------------------------------|-----------------------------------------|------------|--------------------------------------------|---------------|-----------------------|
| CHIGGERS                                               | 0                                       | 0          | 6                                          | 1.7751        | 0(0-Inf)              |
| CHILBLAIN, NOS                                         | 0                                       | 0          | 7                                          | 1.8152        | 0(0-Inf)              |
| CHILD'S, B (GRADING OF LIVER DISEASE) (SCORE 7-9)      | 0                                       | 0          | 1                                          | 0.4048        | 0(0-Inf)              |
| CHILD'S, C (GRADING OF LIVER DISEASE) (SCORE 10 >)     | 0                                       | 0          | 3                                          | 0.9164        | 0(0-Inf)              |
| CHILLS                                                 | 6                                       | 59.3784    | 112                                        | 55.0628       | 1.0784(0.4732-2.4577) |
| CHIP (BONE) CODE ALSO FRACTURE BY SITE                 | 0                                       | 0          | 4                                          | 1.262         | 0(0-Inf)              |
| CHLAMYDIA***CODE ALSO INFECTION BY SITE IF STATED      | 0                                       | 0          | 1                                          | 0.234         | 0(0-Inf)              |
| CHLOASMA                                               | 0                                       | 0          | 5                                          | 2.6441        | 0(0-Inf)              |
| CHOKING                                                | 2                                       | 19.5239    | 61                                         | 29.4518       | 0.6629(0.1617-2.7182) |
| CHOKING SENSATION                                      | 0                                       | 0          | 4                                          | 1.1698        | 0(0-Inf)              |
| CHOLANGIOCARCINOMA (INTRAHEPATIC BILE DUCT #)          | 0                                       | 0          | 13                                         | 6.1355        | 0(0-Inf)              |
| CHOLANGIOLITIS (INTRAHEPATIC)                          | 0                                       | 0          | 1                                          | 0.4751        | 0(0-Inf)              |
| CHOLANGIOMA, NOS                                       | 0                                       | 0          | 1                                          | 0.405         | 0(0-Inf)              |
| CHOLANGITIS, NOS                                       | 4                                       | 36.537     | 63                                         | 27.4314       | 1.3319(0.4831-3.6723) |
| CHOLANGITIS, SCLEROSING                                | 1                                       | 6.9512     | 8                                          | 2.0735        | 3.3524(0.412-27.278)  |
| CHOLECYSTITIS, (ACALCULUS) XANTHOGRANULOMATOUS         | 0                                       | 0          | 5                                          | 3.7925        | 0(0-Inf)              |
| CHOLECYSTITIS, ACUTE (GANGRENOUS)                      | 12                                      | 90.6894    | 389                                        | 123.0294      | 0.7371(0.4145-1.3109) |
| CHOLECYSTITIS, CHRONIC                                 | 49                                      | 362.2549   | 1193                                       | 297.7607      | 1.2166(0.9134-1.6205) |
| CHOLECYSTITIS, GANGRENOUS                              | 0                                       | 0          | 5                                          | 1.7338        | 0(0-Inf)              |
| CHOLECYSTITIS, NOS                                     | 4                                       | 31.5823    | 166                                        | 56.8451       | 0.5556(0.2057-1.5004) |
| CHOLECYSTITIS, SUBACUTE                                | 7                                       | 51.3201    | 81                                         | 19.402        | 2.6451(1.2162-5.7528) |
| CHOLEDOCHOLITHIASIS                                    | 6                                       | 48.8334    | 203                                        | 73.7095       | 0.6625(0.2937-1.4946) |
| CHOLELITHIASIS                                         | 69                                      | 518.9358   | 1658                                       | 447.0471      | 1.1608(0.9116-1.4781) |
| CHOLEMIA, NOS, SEE ALSO JAUNDICE                       | 0                                       | 0          | 1                                          | 1.9061        | 0(0-Inf)              |
| CHOLESTASIS, NOS                                       | 1                                       | 7.3084     | 26                                         | 7.679         | 0.9517(0.1284-7.0553) |
| CHOLESTEATOMA, EAR OR MASTOID                          | 1                                       | 7.9052     | 56                                         | 13.8066       | 0.5726(0.079-4.1479)  |
| CHOLESTEATOMA, NOS, CODE ALSO NEOPLASM, BENIGN BY SITE | 0                                       | 0          | 5                                          | 1.2666        | 0(0-Inf)              |
| CHOLESTERIN (VITREOUS)                                 | 0                                       | 0          | 1                                          | 0.3526        | 0(0-Inf)              |
| CHOLESTEROSIS, NOS                                     | 7                                       | 53.951     | 171                                        | 39.8152       | 1.355(0.6346-2.8932)  |
| CHONDRITIS                                             | 0                                       | 0          | 24                                         | 5.961         | 0(0-Inf)              |
| CHONDROCALCINOSIS                                      | 7                                       | 59.9182    | 209                                        | 81.2115       | 0.7378(0.3468-1.5694) |
| CHONDRODERMATITIS NODULARIS HELICIS                    | 6                                       | 48.244     | 139                                        | 49.4408       | 0.9758(0.43-2.2146)   |
| CHONDROLYSIS                                           | 0                                       | 0          | 6                                          | 1.5022        | 0(0-Inf)              |
| CHONDROMA, NEC, CODE ALSO NEOPLASM, BENIGN BY SITE     | 4                                       | 28.9664    | 25                                         | 6.0743        | 4.7687(1.6426-13.844) |
| CHONDROMA, NOS                                         | 0                                       | 0          | 2                                          | 0.4853        | 0(0-Inf)              |
| CHONDROMALACIA, KNEE                                   | 2                                       | 15.6112    | 127                                        | 30.6868       | 0.5087(0.1256-2.0602) |
| CHONDROMALACIA, NOS                                    | 2                                       | 16.4454    | 64                                         | 15.5113       | 1.0602(0.2586-4.3472) |
| CHONDROMALACIA, PATELLA                                | 11                                      | 101.0085   | 392                                        | 98.9492       | 1.0208(0.5599-1.8612) |
| CHONDROMATOSIS (SYNOVIAL)                              | 0                                       | 0          | 7                                          | 1.5622        | 0(0-Inf)              |
| CHONDROSARCOMA CODE ALSO NEOPLASM MALIGNANT BY SITE    | 0                                       | 0          | 1                                          | 0.2729        | 0(0-Inf)              |

| Description                                              | No. of Positive Cases with Disease Code | Case Rate* | No. of Positive Controls with Disease Code | Control Rate* | Relative Risk (95%CI)    |
|----------------------------------------------------------|-----------------------------------------|------------|--------------------------------------------|---------------|--------------------------|
| CHORDOMA, BENIGN, NOS CODE ALSO NEOPLASM, BENIGN BY SITE | 0                                       | 0          | 1                                          | 0.2354        | 0(0-Inf)                 |
| CHORDOMA, CLIVUS                                         | 0                                       | 0          | 1                                          | 0.4048        | 0(0-Inf)                 |
| CHOREA, HEREDITARY                                       | 0                                       | 0          | 1                                          | 0.2354        | 0(0-Inf)                 |
| CHOREA, HUNTINGTON'S                                     | 0                                       | 0          | 3                                          | 0.8018        | 0(0-Inf)                 |
| CHOREA, NOS                                              | 0                                       | 0          | 10                                         | 2.7945        | 0(0-Inf)                 |
| CHOREA, SENILE                                           | 0                                       | 0          | 1                                          | 0.4048        | 0(0-Inf)                 |
| CHOREIFORM MOVEMENTS                                     | 0                                       | 0          | 2                                          | 0.8096        | 0(0-Inf)                 |
| CHOREOATHETOSIS, NOS                                     | 0                                       | 0          | 3                                          | 1.2146        | 0(0-Inf)                 |
| CHORIORETINITIS, NOS                                     | 1                                       | 9.7088     | 7                                          | 1.8845        | 5.1518(0.622-42.6699)    |
| CHORIORETINOPATHY, CENTRAL SEROUS                        | 0                                       | 0          | 7                                          | 2.9306        | 0(0-Inf)                 |
| CHOROIDITIS, NOS                                         | 0                                       | 0          | 5                                          | 1.1117        | 0(0-Inf)                 |
| CHOROIDOPATHY                                            | 1                                       | 7.7071     | 5                                          | 1.6518        | 4.666(0.533-40.8482)     |
| CHROMOMYCOSIS                                            | 0                                       | 0          | 1                                          | 0.2354        | 0(0-Inf)                 |
| CICATRIX, EYELID                                         | 1                                       | 10.0543    | 1                                          | 0.2718        | 36.9957(2.1892-625.1839) |
| CICATRIX, MOUTH                                          | 0                                       | 0          | 9                                          | 2.0945        | 0(0-Inf)                 |
| CICATRIX, NOS, SEE ALSO SCAR (SKIN#)                     | 7                                       | 58.1301    | 87                                         | 32.4538       | 1.7912(0.8263-3.8828)    |
| CICATRIX, URETHRA                                        | 0                                       | 0          | 3                                          | 0.7175        | 0(0-Inf)                 |
| CIGARETTE USE                                            | 0                                       | 0          | 2                                          | 0.4853        | 0(0-Inf)                 |
| CIRCULATING ANTICOAGULANT                                | 0                                       | 0          | 6                                          | 1.3474        | 0(0-Inf)                 |
| CIRRHOISIS, ALCOHOLIC                                    | 4                                       | 28.3135    | 22                                         | 6.3316        | 4.4718(1.5268-13.0974)   |
| CIRRHOISIS, BILIARY, NOS                                 | 0                                       | 0          | 8                                          | 1.9713        | 0(0-Inf)                 |
| CIRRHOISIS, BILIARY, PRIMARY--PBC                        | 3                                       | 22.928     | 28                                         | 6.3674        | 3.6008(1.0834-11.9684)   |
| CIRRHOISIS, BILIARY, SECONDARY                           | 0                                       | 0          | 2                                          | 0.4708        | 0(0-Inf)                 |
| CIRRHOISIS, CARDIAC                                      | 0                                       | 0          | 3                                          | 2.6637        | 0(0-Inf)                 |
| CIRRHOISIS, CHRONIC, NEC                                 | 0                                       | 0          | 2                                          | 0.7896        | 0(0-Inf)                 |
| CIRRHOISIS, CRYPTOGENIC                                  | 1                                       | 8.1001     | 16                                         | 5.7454        | 1.4098(0.1854-10.7199)   |
| CIRRHOISIS, HEPATIC, NOS                                 | 2                                       | 15.3717    | 42                                         | 13.9915       | 1.0986(0.2648-4.5577)    |
| CIRRHOISIS, IDIOPATHIC                                   | 0                                       | 0          | 3                                          | 0.6986        | 0(0-Inf)                 |
| CIRRHOISIS, LAENNEC'S                                    | 1                                       | 7.1696     | 1                                          | 0.3094        | 23.1724(1.396-384.6533)  |
| CIRRHOISIS, LIVER, ALCOHOLIC                             | 2                                       | 14.0318    | 10                                         | 2.8662        | 4.8956(1.0583-22.6474)   |
| CIRRHOISIS, NODULAR, NEC                                 | 2                                       | 15.9343    | 4                                          | 1.3984        | 11.3948(2.0288-63.9983)  |
| CIRRHOISIS, NOS                                          | 6                                       | 45.8864    | 78                                         | 25.4624       | 1.8021(0.7824-4.1509)    |
| CIRRHOISIS, PIGMENTARY (LIVER)                           | 0                                       | 0          | 2                                          | 0.5475        | 0(0-Inf)                 |
| CIRRHOISIS, PORTAL                                       | 1                                       | 8.8551     | 1                                          | 0.2902        | 30.5145(1.8388-506.3923) |
| CIRRHOISIS, SEPTAL                                       | 0                                       | 0          | 1                                          | 0.234         | 0(0-Inf)                 |
| CLAUDICATION, EXTREMITY, LOWER, NEC                      | 8                                       | 77.1304    | 181                                        | 85.4493       | 0.9026(0.4439-1.8356)    |
| CLAUDICATION, EXTREMITY, UPPER                           | 0                                       | 0          | 6                                          | 2.3691        | 0(0-Inf)                 |
| CLAUDICATION, HIP                                        | 0                                       | 0          | 11                                         | 6.106         | 0(0-Inf)                 |
| CLAUDICATION, INTERMITTENT, SEE ALSO SITE STATED         | 3                                       | 29.0509    | 133                                        | 63.5565       | 0.4571(0.1454-1.4374)    |

| Description                                            | No. of Positive Cases with Disease Code | Case Rate* | No. of Positive Controls with Disease Code | Control Rate* | Relative Risk (95%CI)  |
|--------------------------------------------------------|-----------------------------------------|------------|--------------------------------------------|---------------|------------------------|
| CLAUDICATION, NEC, CALF                                | 6                                       | 53.1799    | 81                                         | 33.7643       | 1.575(0.685-3.6216)    |
| CLAUDICATION, NEC, LEG                                 | 3                                       | 27.4599    | 103                                        | 45.1966       | 0.6076(0.1924-1.9187)  |
| CLAUDICATION, NOS                                      | 24                                      | 240.7973   | 380                                        | 187.7999      | 1.2822(0.8476-1.9396)  |
| CLAUDICATION, PSEUDO, HIP                              | 0                                       | 0          | 1                                          | 0.8884        | 0(0-Inf)               |
| CLAUDICATION, PSEUDO, LEG                              | 0                                       | 0          | 9                                          | 5.6985        | 0(0-Inf)               |
| CLAUDICATION, PSEUDO, LOWER EXTREMITY                  | 0                                       | 0          | 12                                         | 4.9862        | 0(0-Inf)               |
| CLAUDICATION, PSEUDO, NOS                              | 0                                       | 0          | 7                                          | 5.0658        | 0(0-Inf)               |
| CLAUDICATION, SPINAL CORD                              | 0                                       | 0          | 6                                          | 2.7024        | 0(0-Inf)               |
| CLAUDICATION, SPINAL CORD, NEUROGENIC                  | 2                                       | 21.2333    | 94                                         | 51.3549       | 0.4135(0.1017-1.6803)  |
| CLAUSTROPHOBIA                                         | 2                                       | 14.0153    | 30                                         | 8.151         | 1.7195(0.4082-7.2422)  |
| CLAVUS                                                 | 3                                       | 21.1354    | 77                                         | 18.5471       | 1.1396(0.3583-3.6246)  |
| CLAWHAND, NOS                                          | 0                                       | 0          | 2                                          | 0.4708        | 0(0-Inf)               |
| CLAWTOE, CONGENITAL                                    | 0                                       | 0          | 1                                          | 0.398         | 0(0-Inf)               |
| CLAWTOE, NOS                                           | 1                                       | 7.2043     | 31                                         | 7.1607        | 1.0061(0.1366-7.4124)  |
| CLEANING OF MASTOID CAVITY / RECHECK OF MASTOID CAVITY | 1                                       | 7.8519     | 36                                         | 12.2427       | 0.6414(0.0876-4.6965)  |
| CLEFT, ALVEOLAR PROCESS                                | 0                                       | 0          | 3                                          | 0.9639        | 0(0-Inf)               |
| CLEFT, BRANCHIAL                                       | 0                                       | 0          | 1                                          | 2.4885        | 0(0-Inf)               |
| CLEFT, LIP                                             | 0                                       | 0          | 2                                          | 0.7053        | 0(0-Inf)               |
| CLEFT, MITRAL VALVE                                    | 0                                       | 0          | 1                                          | 0.4048        | 0(0-Inf)               |
| CLEFT, PALATE, NOS                                     | 0                                       | 0          | 1                                          | 0.234         | 0(0-Inf)               |
| CLEFT, PALATE, WITH CLEFT LIP                          | 0                                       | 0          | 2                                          | 0.507         | 0(0-Inf)               |
| CLENCHING JAW (TEETH)                                  | 1                                       | 7.1994     | 5                                          | 1.2018        | 5.9903(0.6823-52.5914) |
| CLICK (SYSTOLIC SYNDROME)                              | 3                                       | 23.5113    | 146                                        | 33.1235       | 0.7098(0.2258-2.2314)  |
| CLICK (SYSTOLIC)                                       | 0                                       | 0          | 36                                         | 10.2099       | 0(0-Inf)               |
| CLICKING HIP, ACQUIRED                                 | 0                                       | 0          | 2                                          | 0.8096        | 0(0-Inf)               |
| CLIMACTERIC, FEMALE, NOS                               | 0                                       | 0          | 17                                         | 10.8055       | 0(0-Inf)               |
| CLIMACTERIC, MALE                                      | 0                                       | 0          | 2                                          | 0.5458        | 0(0-Inf)               |
| CLINIC, (METABOLIC) BONE (DISEASE)                     | 33                                      | 239.9872   | 689                                        | 179.3511      | 1.3381(0.9422-1.9004)  |
| CLINIC, ADRENAL                                        | 0                                       | 0          | 2                                          | 0.5837        | 0(0-Inf)               |
| CLINIC, ALLERGY                                        | 0                                       | 0          | 1                                          | 0.234         | 0(0-Inf)               |
| CLINIC, AMPUTEE                                        | 1                                       | 7.0199     | 26                                         | 7.3639        | 0.9533(0.1288-7.0566)  |
| CLINIC, BREAST                                         | 0                                       | 0          | 1                                          | 0.4049        | 0(0-Inf)               |
| CLINIC, CARDIAC                                        | 2                                       | 16.8422    | 24                                         | 6.1816        | 2.7246(0.6387-11.6218) |
| CLINIC, CARDIOVASCULAR HEALTH                          | 29                                      | 210.7631   | 904                                        | 261.5535      | 0.8058(0.5563-1.1672)  |
| CLINIC, COAGULATION THERAPY                            | 0                                       | 0          | 5                                          | 5.4599        | 0(0-Inf)               |
| CLINIC, COLON AND RECTAL SURGERY                       | 0                                       | 0          | 71                                         | 22.4335       | 0(0-Inf)               |
| CLINIC, D.C.M. ACUTE ILLNESS                           | 19                                      | 292.7575   | 296                                        | 101.1367      | 2.8947(1.8167-4.6122)  |
| CLINIC, DIABETIC                                       | 28                                      | 207.8037   | 763                                        | 229.6505      | 0.9049(0.62-1.3206)    |
| CLINIC, DIET                                           | 16                                      | 157.6064   | 555                                        | 140.8242      | 1.1192(0.68-1.842)     |
| CLINIC, ENDOCRINE                                      | 26                                      | 199.3644   | 731                                        | 171.2576      | 1.1641(0.7863-1.7236)  |

| Description                                         | No. of Positive Cases with Disease Code | Case Rate* | No. of Positive Controls with Disease Code | Control Rate* | Relative Risk (95%CI)  |
|-----------------------------------------------------|-----------------------------------------|------------|--------------------------------------------|---------------|------------------------|
| CLINIC, FOOT                                        | 0                                       | 0          | 57                                         | 13.103        | 0(0-Inf)               |
| CLINIC, G I                                         | 12                                      | 113.9118   | 212                                        | 53.2104       | 2.1408(1.1934-3.8402)  |
| CLINIC, GENETIC                                     | 1                                       | 11.8404    | 96                                         | 29.4429       | 0.4021(0.056-2.8886)   |
| CLINIC, HAND                                        | 7                                       | 53.7812    | 202                                        | 46.8237       | 1.1486(0.5394-2.4458)  |
| CLINIC, HEMATOLOGY                                  | 0                                       | 0          | 1                                          | 0.3526        | 0(0-Inf)               |
| CLINIC, HYPERTENSION                                | 7                                       | 49.3289    | 122                                        | 32.7196       | 1.5076(0.7016-3.2395)  |
| CLINIC, LIPID                                       | 12                                      | 92.1955    | 483                                        | 117.4353      | 0.7851(0.4422-1.3938)  |
| CLINIC, LYMPHOMA                                    | 0                                       | 0          | 1                                          | 0.3526        | 0(0-Inf)               |
| CLINIC, NICOTINE DEPENDENCE CENTER                  | 7                                       | 59.6243    | 233                                        | 58.54         | 1.0185(0.4794-2.1642)  |
| CLINIC, OBESITY                                     | 0                                       | 0          | 6                                          | 2.6841        | 0(0-Inf)               |
| CLINIC, ORTHOPEDIC                                  | 0                                       | 0          | 25                                         | 5.8525        | 0(0-Inf)               |
| CLINIC, PACEMAKER                                   | 7                                       | 78.5556    | 199                                        | 117.0256      | 0.6713(0.3155-1.4283)  |
| CLINIC, PAIN                                        | 1                                       | 6.9819     | 35                                         | 9.1689        | 0.7615(0.1038-5.5841)  |
| CLINIC, PANCREAS                                    | 0                                       | 0          | 1                                          | 0.4048        | 0(0-Inf)               |
| CLINIC, PARATHYROID-METABOLIC                       | 4                                       | 33.8287    | 57                                         | 13.3653       | 2.5311(0.9129-7.0173)  |
| CLINIC, PITUITARY                                   | 0                                       | 0          | 3                                          | 1.1944        | 0(0-Inf)               |
| CLINIC, PITUITARY, GONADAL, AND ADRENAL-PGA         | 5                                       | 35.7978    | 97                                         | 27.8601       | 1.2849(0.5214-3.1667)  |
| CLINIC, PODIATRY                                    | 139                                     | 1159.451   | 3016                                       | 840.4142      | 1.3796(1.1632-1.6363)  |
| CLINIC, PREVENTIVE MEDICINE                         | 76                                      | 1477.891   | 2729                                       | 1173.825      | 1.259(1.0019-1.5821)   |
| CLINIC, PULMONARY HEALTH                            | 9                                       | 73.2288    | 165                                        | 59.5168       | 1.2304(0.6276-2.4122)  |
| CLINIC, RESPIRATORY                                 | 46                                      | 340.6327   | 678                                        | 192.2339      | 1.772(1.3127-2.392)    |
| CLINIC, RHEUMATOLOGY                                | 16                                      | 112.393    | 403                                        | 100.5741      | 1.1175(0.6769-1.8448)  |
| CLINIC, SLEEP DISORDER CENTER                       | 11                                      | 78.3284    | 447                                        | 128.5939      | 0.6091(0.3346-1.109)   |
| CLINIC, SPECIAL NEC                                 | 10                                      | 72.8573    | 235                                        | 68.5575       | 1.0627(0.5633-2.0051)  |
| CLINIC, SPINE                                       | 6                                       | 43.2642    | 211                                        | 60.4881       | 0.7153(0.3172-1.613)   |
| CLINIC, SPORTS MEDICINE CENTER-SMC                  | 15                                      | 110.6947   | 728                                        | 179.353       | 0.6172(0.3698-1.03)    |
| CLINIC, STONE                                       | 0                                       | 0          | 11                                         | 3.1063        | 0(0-Inf)               |
| CLINIC, THORACIC                                    | 31                                      | 222.8812   | 592                                        | 148.3772      | 1.5021(1.0454-2.1585)  |
| CLINIC, VASCULAR                                    | 0                                       | 0          | 1                                          | 0.3526        | 0(0-Inf)               |
| CLINODACTYLY                                        | 0                                       | 0          | 1                                          | 0.398         | 0(0-Inf)               |
| CLONOPATHY, T CELL                                  | 0                                       | 0          | 1                                          | 0.4048        | 0(0-Inf)               |
| CLONORCHIASIS                                       | 0                                       | 0          | 1                                          | 0.827         | 0(0-Inf)               |
| CLOT, ARTERY, SEE ALSO EMBOLISM BY SITE             | 1                                       | 11.7239    | 0                                          | 0             | 8842953064.8105(0-Inf) |
| CLOT, BLOOD, ARTERY, EXTREMITY, SEE ALSO THROMBOSIS | 0                                       | 0          | 1                                          | 0.2729        | 0(0-Inf)               |
| CLOT, CEREBRAL                                      | 0                                       | 0          | 1                                          | 0.8883        | 0(0-Inf)               |
| CLOT, INTRAMURAL (HEART#)                           | 0                                       | 0          | 2                                          | 0.7896        | 0(0-Inf)               |
| CLOT, URETER                                        | 0                                       | 0          | 1                                          | 0.3526        | 0(0-Inf)               |
| CLOT, VEIN, NEC, SEE ALSO THROMBOSIS BY SITE        | 1                                       | 6.94       | 7                                          | 1.7587        | 3.9461(0.4757-32.7367) |
| CLOUDY, ANTRUM                                      | 0                                       | 0          | 2                                          | 0.5069        | 0(0-Inf)               |
| CLOUDY, POSTERIOR CAPSULE (FOLLOWING CATARACTS)     | 4                                       | 51.7519    | 91                                         | 66.8032       | 0.7747(0.2841-2.1127)  |



| Description                                              | No. of Positive Cases with Disease Code | Case Rate* | No. of Positive Controls with Disease Code | Control Rate* | Relative Risk (95%CI)  |
|----------------------------------------------------------|-----------------------------------------|------------|--------------------------------------------|---------------|------------------------|
| CLUBBING, FINGER, CONGENITAL                             | 0                                       | 0          | 1                                          | 1.0363        | 0(0-Inf)               |
| CLUBBING, NAILS                                          | 0                                       | 0          | 2                                          | 2.9783        | 0(0-Inf)               |
| CLUBBING, NOS                                            | 1                                       | 13.5134    | 6                                          | 4.5376        | 2.9781(0.3548-24.9996) |
| CLUBFOOT (SEE ALSO TALIPES)                              | 0                                       | 0          | 4                                          | 1.309         | 0(0-Inf)               |
| COAGULATION DEFECT                                       | 0                                       | 0          | 5                                          | 1.2665        | 0(0-Inf)               |
| COAGULOPATHY, DISSEMINATED INTRAVASCULAR--DIC            | 2                                       | 21.5692    | 17                                         | 9.4764        | 2.2761(0.5219-9.9273)  |
| COAGULOPATHY, FAMILIAL                                   | 0                                       | 0          | 1                                          | 0.234         | 0(0-Inf)               |
| COAGULOPATHY, NOS                                        | 2                                       | 24.4556    | 58                                         | 38.75         | 0.6311(0.1538-2.5899)  |
| COALITION, CALCANEAL-NAVICULAR                           | 0                                       | 0          | 2                                          | 0.6774        | 0(0-Inf)               |
| COALITION, TALOCALCANEAL                                 | 0                                       | 0          | 1                                          | 0.2354        | 0(0-Inf)               |
| COALITION, TARSAL, CONGENITAL                            | 0                                       | 0          | 2                                          | 0.4853        | 0(0-Inf)               |
| COARCTATION OF AORTA                                     | 0                                       | 0          | 2                                          | 0.5475        | 0(0-Inf)               |
| COBBLESTONE RETINA                                       | 0                                       | 0          | 1                                          | 0.8531        | 0(0-Inf)               |
| COCCIDIOIDOMYCOSIS                                       | 0                                       | 0          | 9                                          | 2.799         | 0(0-Inf)               |
| COCCYGODYNIA                                             | 10                                      | 73.3105    | 249                                        | 57.6835       | 1.2709(0.6739-2.3968)  |
| CODE 45                                                  | 1                                       | 7.2069     | 23                                         | 6.5822        | 1.0949(0.1469-8.1625)  |
| CODE NOT FOUND - NOT VERIFIED (MEDICAL INDEX STUDY ONLY) | 0                                       | 0          | 1                                          | 0.2729        | 0(0-Inf)               |
| COFFEE GROUNDS MATERIAL IN STOMACH                       | 2                                       | 25.0837    | 24                                         | 16.7157       | 1.5006(0.3528-6.3822)  |
| COLD, ACUTE                                              | 0                                       | 0          | 1                                          | 0.2354        | 0(0-Inf)               |
| COLD, COMMON                                             | 2                                       | 14.3509    | 41                                         | 9.7918        | 1.4656(0.3526-6.0924)  |
| COLD, FEET / HANDS (VASCULAR #)                          | 3                                       | 32.4529    | 27                                         | 15.1379       | 2.1438(0.6464-7.1097)  |
| COLD, HEAD                                               | 1                                       | 7.2124     | 6                                          | 1.7216        | 4.1893(0.4937-35.5459) |
| COLD, NOS                                                | 2                                       | 15.4597    | 74                                         | 24.2963       | 0.6363(0.1557-2.5995)  |
| COLD, SORE                                               | 1                                       | 7.3177     | 74                                         | 21.8727       | 0.3346(0.0464-2.4119)  |
| COLD, VIRAL                                              | 0                                       | 0          | 4                                          | 4.7827        | 0(0-Inf)               |
| COLIC, BILIARY                                           | 7                                       | 48.9152    | 198                                        | 50.8481       | 0.962(0.4517-2.0488)   |
| COLIC, GALLBLADDER                                       | 0                                       | 0          | 9                                          | 2.044         | 0(0-Inf)               |
| COLIC, NOS                                               | 0                                       | 0          | 14                                         | 3.2335        | 0(0-Inf)               |
| COLIC, RENAL                                             | 7                                       | 50.002     | 211                                        | 54.4124       | 0.9189(0.4321-1.9544)  |
| COLIC, URETERAL                                          | 4                                       | 33.4614    | 112                                        | 29.8906       | 1.1195(0.4119-3.0422)  |
| COLITIS, ALLERGIC                                        | 0                                       | 0          | 3                                          | 0.741         | 0(0-Inf)               |
| COLITIS, AMEBIC (E. HISTOLYTIC)                          | 0                                       | 0          | 1                                          | 0.8272        | 0(0-Inf)               |
| COLITIS, CHRONIC                                         | 6                                       | 45.0612    | 118                                        | 36.9066       | 1.221(0.5361-2.7809)   |
| COLITIS, CLOSTRIDIUM (DIFFICILE)                         | 1                                       | 11.0003    | 60                                         | 34.8649       | 0.3155(0.0436-2.2807)  |
| COLITIS, COLLAGENOUS                                     | 5                                       | 48.4241    | 35                                         | 16.8331       | 2.8767(1.1194-7.3931)  |
| COLITIS, CROHN'S                                         | 1                                       | 7.0206     | 26                                         | 6.9702        | 1.0072(0.1359-7.4677)  |
| COLITIS, GRANULOMATOUS                                   | 0                                       | 0          | 4                                          | 1.1114        | 0(0-Inf)               |
| COLITIS, HEMORRHAGIC                                     | 0                                       | 0          | 3                                          | 1.1478        | 0(0-Inf)               |
| COLITIS, INFECTIOUS                                      | 4                                       | 34.63      | 16                                         | 6.3855        | 5.4233(1.7907-16.4244) |

| Description                                               | No. of Positive Cases with Disease Code | Case Rate* | No. of Positive Controls with Disease Code | Control Rate* | Relative Risk (95%CI)  |
|-----------------------------------------------------------|-----------------------------------------|------------|--------------------------------------------|---------------|------------------------|
| COLITIS, ISCHEMIC                                         | 4                                       | 36.6281    | 114                                        | 50.061        | 0.7317(0.2694-1.9873)  |
| COLITIS, LYMPHOCYTIC                                      | 1                                       | 9.2841     | 32                                         | 14.3575       | 0.6466(0.088-4.7509)   |
| COLITIS, MICROSCOPIC                                      | 2                                       | 19.3173    | 41                                         | 19.4976       | 0.9907(0.2387-4.1127)  |
| COLITIS, MUCOUS                                           | 0                                       | 0          | 1                                          | 0.8277        | 0(0-Inf)               |
| COLITIS, NOS (INFECTIOUS#)                                | 4                                       | 30.656     | 37                                         | 12.0458       | 2.5449(0.9007-7.1909)  |
| COLITIS, NOS (NON-INFECTIOUS#)                            | 8                                       | 67.9008    | 316                                        | 122.2739      | 0.5553(0.275-1.1215)   |
| COLITIS, PSEUDOMEMBRANOUS                                 | 1                                       | 8.4975     | 42                                         | 16.3371       | 0.5201(0.0714-3.7911)  |
| COLITIS, TOXIC                                            | 0                                       | 0          | 2                                          | 0.4681        | 0(0-Inf)               |
| COLITIS, ULCERATIVE, ACUTE                                | 0                                       | 0          | 3                                          | 0.964         | 0(0-Inf)               |
| COLITIS, ULCERATIVE, CHRONIC --CUC                        | 4                                       | 30.2246    | 81                                         | 19.6971       | 1.5345(0.5602-4.2034)  |
| COLITIS, ULCERATIVE, NOS                                  | 1                                       | 7.4065     | 84                                         | 25.8869       | 0.2861(0.0398-2.0584)  |
| COLLAPSE, CARDIORESPIRATORY                               | 2                                       | 14.2409    | 0                                          | 0             | 4306528608.7356(0-Inf) |
| COLLAPSE, CARDIOVASCULAR                                  | 0                                       | 0          | 4                                          | 2.3949        | 0(0-Inf)               |
| COLLAPSE, CIRCULATORY                                     | 0                                       | 0          | 2                                          | 0.5909        | 0(0-Inf)               |
| COLLAPSE, LUNG                                            | 5                                       | 44.8422    | 30                                         | 12.653        | 3.544(1.3644-9.2054)   |
| COLLAPSE, NOSE                                            | 0                                       | 0          | 31                                         | 8.8554        | 0(0-Inf)               |
| COLLAPSE, TRACHEA                                         | 0                                       | 0          | 1                                          | 0.3526        | 0(0-Inf)               |
| COLLAPSE, VERTEBRAL                                       | 2                                       | 19.5616    | 12                                         | 5.7804        | 3.3841(0.7484-15.3029) |
| COLLAPSE, VITREOUS (INCLUDES PROLAPSE)                    | 19                                      | 135.0041   | 496                                        | 129.9387      | 1.039(0.6561-1.6452)   |
| COLLAR TYPE, BLADDER NECK                                 | 1                                       | 19.4361    | 64                                         | 62.77         | 0.3096(0.0429-2.2347)  |
| COLLAR TYPE, PROSTATE                                     | 1                                       | 8.1289     | 5                                          | 1.9009        | 4.2762(0.4921-37.1597) |
| COLLECTION BILE (PERITONEUM#)                             | 0                                       | 0          | 1                                          | 0.8877        | 0(0-Inf)               |
| COLLOID THYROID (SEE ALSO GOITER-COLLOID)                 | 0                                       | 0          | 7                                          | 1.755         | 0(0-Inf)               |
| COLOBOMA, NOS                                             | 0                                       | 0          | 4                                          | 1.0301        | 0(0-Inf)               |
| COMA, DIABETIC                                            | 0                                       | 0          | 5                                          | 2.3429        | 0(0-Inf)               |
| COMA, HYPOGLYCEMIC                                        | 0                                       | 0          | 1                                          | 2.4855        | 0(0-Inf)               |
| COMA, NOS                                                 | 2                                       | 22.1766    | 7                                          | 4.0782        | 5.4378(1.112-26.5907)  |
| COMA, NOS, CAUSE SPECIFIED                                | 0                                       | 0          | 8                                          | 4.3417        | 0(0-Inf)               |
| COMATOSE                                                  | 0                                       | 0          | 2                                          | 3.0809        | 0(0-Inf)               |
| COMEDO, BREAST                                            | 0                                       | 0          | 4                                          | 1.1676        | 0(0-Inf)               |
| COMEDO, NOS                                               | 8                                       | 56.9105    | 265                                        | 73.1884       | 0.7776(0.3842-1.5737)  |
| COMEDOCARCINOMA                                           | 0                                       | 0          | 28                                         | 12.399        | 0(0-Inf)               |
| COMEDOMASTITIS                                            | 0                                       | 0          | 10                                         | 2.6375        | 0(0-Inf)               |
| COMEDONES SEE ALSO COMEDO                                 | 7                                       | 61.2431    | 199                                        | 81.1285       | 0.7549(0.3546-1.6069)  |
| COMPLEX, EISENMENGER                                      | 0                                       | 0          | 1                                          | 0.2729        | 0(0-Inf)               |
| COMPLICATION, AMPUTATION, STUMP                           | 2                                       | 16.4836    | 23                                         | 8.6114        | 1.9142(0.4482-8.1751)  |
| COMPLICATION, ARTIFICIAL GENITOURINARY SPHINCTER / DEVICE | 2                                       | 19.1506    | 5                                          | 2.3678        | 8.0881(1.5417-42.4311) |
| COMPLICATION, ARTIFICIAL LIMB (PROSTHESIS)                | 0                                       | 0          | 4                                          | 1.968         | 0(0-Inf)               |

| Description                                                            | No. of Positive Cases with Disease Code | Case Rate* | No. of Positive Controls with Disease Code | Control Rate* | Relative Risk (95%CI)  |
|------------------------------------------------------------------------|-----------------------------------------|------------|--------------------------------------------|---------------|------------------------|
| COMPLICATION, BALLOON DILATATION (ANY SITE) CODE ALSO STATUS, BY SITE  | 0                                       | 0          | 18                                         | 8.3413        | 0(0-Inf)               |
| COMPLICATION, BILIARY STENT                                            | 0                                       | 0          | 11                                         | 4.7439        | 0(0-Inf)               |
| COMPLICATION, BONE FLAP                                                | 0                                       | 0          | 2                                          | 0.5457        | 0(0-Inf)               |
| COMPLICATION, BONE GRAFT                                               | 0                                       | 0          | 6                                          | 1.5041        | 0(0-Inf)               |
| COMPLICATION, CANNULA (FOR DIALYSIS)                                   | 2                                       | 18.0266    | 68                                         | 29.2636       | 0.616(0.1506-2.5193)   |
| COMPLICATION, CARDIAC ARREST INTRAOPERATIVE                            | 0                                       | 0          | 1                                          | 2.4882        | 0(0-Inf)               |
| COMPLICATION, CARDIAC ARREST, POST OP                                  | 0                                       | 0          | 1                                          | 0.4049        | 0(0-Inf)               |
| COMPLICATION, CAST/SPLINT/IMMOBILIZING DEVICE, NEC                     | 2                                       | 18.5793    | 36                                         | 16.1521       | 1.1503(0.2757-4.8)     |
| COMPLICATION, CATHETER, HICKMAN                                        | 0                                       | 0          | 7                                          | 2.5158        | 0(0-Inf)               |
| COMPLICATION, CATHETER, INTRAVENOUS                                    | 1                                       | 7.3538     | 23                                         | 7.0378        | 1.0449(0.1403-7.783)   |
| COMPLICATION, CATHETER, PORTA-CATH (GROSHONG)                          | 0                                       | 0          | 5                                          | 1.1771        | 0(0-Inf)               |
| COMPLICATION, CATHETER, URETHRAL                                       | 6                                       | 78.3638    | 139                                        | 100.3731      | 0.7807(0.3443-1.7703)  |
| COMPLICATION, CHEST TUBE, NEC                                          | 0                                       | 0          | 4                                          | 1.3629        | 0(0-Inf)               |
| COMPLICATION, CHOLECYSTECTOMY                                          | 0                                       | 0          | 4                                          | 0.8642        | 0(0-Inf)               |
| COMPLICATION, COLOSTOMY                                                | 1                                       | 8.6653     | 16                                         | 6.4405        | 1.3454(0.1771-10.2213) |
| COMPLICATION, CONTACT LENS                                             | 1                                       | 7.5347     | 23                                         | 5.2085        | 1.4466(0.1939-10.7943) |
| COMPLICATION, CORNEAL GRAFT (CODE ALSO CONDITION IF STATED)            | 0                                       | 0          | 14                                         | 5.1175        | 0(0-Inf)               |
| COMPLICATION, CPR / RESUSCITATION EFFORTS                              | 1                                       | 18.131     | 3                                          | 3.3437        | 5.4225(0.5563-52.8575) |
| COMPLICATION, CYSTOSTOMY                                               | 0                                       | 0          | 2                                          | 1.8977        | 0(0-Inf)               |
| COMPLICATION, DIALYSIS                                                 | 0                                       | 0          | 11                                         | 5.8089        | 0(0-Inf)               |
| COMPLICATION, ENDOTRACHEAL INTUBATION                                  | 0                                       | 0          | 15                                         | 7.2274        | 0(0-Inf)               |
| COMPLICATION, ENTEROSTOMY (STOMAL MALFUNCTION)                         | 0                                       | 0          | 3                                          | 1.5757        | 0(0-Inf)               |
| COMPLICATION, ESOPHAGOGASTROSTOMY                                      | 0                                       | 0          | 1                                          | 0.234         | 0(0-Inf)               |
| COMPLICATION, EXTERNAL FIXATION DEVICE (ORTHO)                         | 0                                       | 0          | 3                                          | 2.0941        | 0(0-Inf)               |
| COMPLICATION, EYE IMPLANT                                              | 0                                       | 0          | 11                                         | 4.7505        | 0(0-Inf)               |
| COMPLICATION, FEEDING TUBE (OTHER THAN NASOGASTRIC)                    | 1                                       | 13.1256    | 30                                         | 22.1638       | 0.5922(0.0805-4.3553)  |
| COMPLICATION, GASTRIC STAPLING / GASTROPLASTY (SURGERY FOR OBESITY)    | 0                                       | 0          | 5                                          | 1.0845        | 0(0-Inf)               |
| COMPLICATION, GASTROENTEROSTOMY                                        | 0                                       | 0          | 6                                          | 1.4244        | 0(0-Inf)               |
| COMPLICATION, GASTROSTOMY                                              | 0                                       | 0          | 5                                          | 2.5945        | 0(0-Inf)               |
| COMPLICATION, GASTROSTOMY TUBE                                         | 0                                       | 0          | 39                                         | 34.4941       | 0(0-Inf)               |
| COMPLICATION, HEARING AID/DEVICE                                       | 1                                       | 14.1138    | 9                                          | 7.4911        | 1.8841(0.2368-14.9907) |
| COMPLICATION, HEART CATHETERIZATION                                    | 1                                       | 9.9584     | 23                                         | 11.4771       | 0.8677(0.1166-6.4574)  |
| COMPLICATION, HEART-LUNG MACHINE                                       | 0                                       | 0          | 1                                          | 0.2728        | 0(0-Inf)               |
| COMPLICATION, ILEAL CONDUIT                                            | 1                                       | 10.971     | 9                                          | 5.1347        | 2.1366(0.268-17.0359)  |
| COMPLICATION, ILEOSTOMY                                                | 1                                       | 7.0397     | 32                                         | 8.6774        | 0.8113(0.1103-5.9663)  |
| COMPLICATION, INFARCTION MYOCARDIAL, INTRAOPERATIVE, CODE ALSO BY SITE | 1                                       | 11.2561    | 0                                          | 0             | 7477564236.2702(0-Inf) |

| Description                                                                          | No. of Positive Cases with Disease Code | Case Rate* | No. of Positive Controls with Disease Code | Control Rate* | Relative Risk (95%CI)    |
|--------------------------------------------------------------------------------------|-----------------------------------------|------------|--------------------------------------------|---------------|--------------------------|
| COMPLICATION, INFARCTION MYOCARDIAL, POSTOPERATIVE, CODE ALSO BY SITE                | 0                                       | 0          | 1                                          | 0.8528        | 0(0-Inf)                 |
| COMPLICATION, INTRAOPERATIVE NEC                                                     | 0                                       | 0          | 5                                          | 4.7345        | 0(0-Inf)                 |
| COMPLICATION, INTRAUTERINE DEVICE-IUD                                                | 0                                       | 0          | 7                                          | 3.4071        | 0(0-Inf)                 |
| COMPLICATION, INTRAVENOUS THERAPY, NEC                                               | 0                                       | 0          | 32                                         | 11.7326       | 0(0-Inf)                 |
| COMPLICATION, JEJUNOSTOMY                                                            | 0                                       | 0          | 5                                          | 1.265         | 0(0-Inf)                 |
| COMPLICATION, LAMINECTOMY                                                            | 0                                       | 0          | 3                                          | 0.9165        | 0(0-Inf)                 |
| COMPLICATION, LASER THERAPY                                                          | 0                                       | 0          | 2                                          | 0.4709        | 0(0-Inf)                 |
| COMPLICATION, LIPOSUCTION / LIPECTOMY                                                | 0                                       | 0          | 1                                          | 0.2729        | 0(0-Inf)                 |
| COMPLICATION, MECHANICAL CORNEAL LENS PROSTHESIS                                     | 0                                       | 0          | 5                                          | 1.7344        | 0(0-Inf)                 |
| COMPLICATION, MEDICAL PROCEDURES (DIAGNOSTIC), NEC (CEREBRAL ANGIOGRAM)              | 0                                       | 0          | 13                                         | 7.0006        | 0(0-Inf)                 |
| COMPLICATION, MUSCLE FLAP                                                            | 0                                       | 0          | 2                                          | 0.432         | 0(0-Inf)                 |
| COMPLICATION, MUSCLE GRAFT                                                           | 0                                       | 0          | 1                                          | 0.2729        | 0(0-Inf)                 |
| COMPLICATION, MYOCUTANEOUS FLAP                                                      | 0                                       | 0          | 7                                          | 1.7373        | 0(0-Inf)                 |
| COMPLICATION, NASOGASTRIC TUBE                                                       | 2                                       | 20.1503    | 49                                         | 24.7211       | 0.8151(0.1976-3.3621)    |
| COMPLICATION, NEOBLADDER, NEC                                                        | 0                                       | 0          | 1                                          | 0.3526        | 0(0-Inf)                 |
| COMPLICATION, NEPHROSTOMY                                                            | 0                                       | 0          | 4                                          | 2.9858        | 0(0-Inf)                 |
| COMPLICATION, NONUNION OF ANY ORTHOPEDIC SURGERY, NEC, CODE ALSO CONDITION IF STATED | 0                                       | 0          | 6                                          | 1.7423        | 0(0-Inf)                 |
| COMPLICATION, NOS, DUE TO ENDOTRACHEAL INTUBATION                                    | 0                                       | 0          | 6                                          | 2.7023        | 0(0-Inf)                 |
| COMPLICATION, ORTHOPEDIC DEVICE, INTERNAL, NOT TOTAL JOINT                           | 1                                       | 7.0074     | 27                                         | 7.125         | 0.9835(0.1328-7.2819)    |
| COMPLICATION, ORTHOPEDIC SCREWS, PLATES, ETC.                                        | 2                                       | 19.586     | 90                                         | 44.1392       | 0.4437(0.1091-1.8052)    |
| COMPLICATION, OSTEOTOMY                                                              | 0                                       | 0          | 14                                         | 3.7437        | 0(0-Inf)                 |
| COMPLICATION, PACEMAKER, EXCEPT MALFUNCTION                                          | 0                                       | 0          | 22                                         | 13.6725       | 0(0-Inf)                 |
| COMPLICATION, PACEMAKER, INFECTION                                                   | 0                                       | 0          | 8                                          | 4.792         | 0(0-Inf)                 |
| COMPLICATION, POST-CYSTOSCOPIC EXAM                                                  | 0                                       | 0          | 1                                          | 0.2354        | 0(0-Inf)                 |
| COMPLICATION, POST-INJECTION                                                         | 0                                       | 0          | 22                                         | 8.2359        | 0(0-Inf)                 |
| COMPLICATION, PROSTHESIS, BREAST                                                     | 3                                       | 60.9315    | 85                                         | 40.8627       | 1.4911(0.4699-4.7318)    |
| COMPLICATION, PROSTHESIS, DENTAL, NEC                                                | 2                                       | 16.0957    | 80                                         | 28.442        | 0.5659(0.1388-2.3074)    |
| COMPLICATION, PROSTHESIS, ORTHOPEDIC, SEE ALSO MALFUNCTION, PROSTHESIS               | 1                                       | 7.1205     | 5                                          | 1.3833        | 5.1475(0.5859-45.2276)   |
| COMPLICATION, PROSTHESIS, PENILE                                                     | 0                                       | 0          | 15                                         | 8.0481        | 0(0-Inf)                 |
| COMPLICATION, PROSTHETIC DEVICE HEARING/COCHLEAR IMPLANT                             | 1                                       | 14.0094    | 1                                          | 0.8071        | 17.3586(1.0502-286.9245) |
| COMPLICATION, PROSTHETIC DEVICE, INTERNAL                                            | 0                                       | 0          | 1                                          | 2.4856        | 0(0-Inf)                 |
| COMPLICATION, PROSTHETIC DEVICE, INTERNAL, HEART VALVE                               | 1                                       | 9.3349     | 9                                          | 4.0633        | 2.2974(0.2875-18.3604)   |
| COMPLICATION, PROSTHETIC DEVICE, INTERNAL, MALFUNCTION, NEC.                         | 1                                       | 7.2353     | 2                                          | 0.5749        | 12.5861(1.089-145.4579)  |

| Description                                                                                | No. of Positive Cases with Disease Code | Case Rate* | No. of Positive Controls with Disease Code | Control Rate* | Relative Risk (95%CI)   |
|--------------------------------------------------------------------------------------------|-----------------------------------------|------------|--------------------------------------------|---------------|-------------------------|
| COMPLICATION, PROSTHETIC DEVICE, INTERNAL, ORTHOPEDIC DEV                                  | 0                                       | 0          | 3                                          | 1.576         | 0(0-Inf)                |
| COMPLICATION, PROSTHETIC DEVICE, INTERNAL, VASCULAR GRAFT                                  | 0                                       | 0          | 1                                          | 0.8877        | 0(0-Inf)                |
| COMPLICATION, PROSTHETIC IMPLANT, NEC                                                      | 1                                       | 7.0652     | 7                                          | 1.9343        | 3.6526(0.4411-30.2442)  |
| COMPLICATION, PROSTHETIC LENS                                                              | 1                                       | 11.4288    | 29                                         | 17.8548       | 0.6401(0.0869-4.7158)   |
| COMPLICATION, PUERPERIUM (POSTPARTUM), NOS                                                 | 0                                       | 0          | 1                                          | 0.4048        | 0(0-Inf)                |
| COMPLICATION, PUMP (MORPHINE)(BACLOFEN), ETC.                                              | 1                                       | 10.1146    | 0                                          | 0             | 14206370365.7645(0-Inf) |
| COMPLICATION, SKIN FLAP                                                                    | 0                                       | 0          | 4                                          | 0.9157        | 0(0-Inf)                |
| COMPLICATION, SKIN GRAFT                                                                   | 0                                       | 0          | 7                                          | 3.9621        | 0(0-Inf)                |
| COMPLICATION, SPEAKING SHUNT (FISTULA)                                                     | 0                                       | 0          | 1                                          | 0.3526        | 0(0-Inf)                |
| COMPLICATION, SPEECH PROSTHESIS (PROVOX)                                                   | 1                                       | 11.2863    | 0                                          | 0             | 7473055629.6295(0-Inf)  |
| COMPLICATION, STENTS, STRUTS (SURGICAL) - INCLUDES EXTRUSION/MALFUNCTION                   | 1                                       | 8.5554     | 22                                         | 8.6351        | 0.9908(0.1328-7.393)    |
| COMPLICATION, STREPTOKINASE INFUSION                                                       | 0                                       | 0          | 4                                          | 1.3221        | 0(0-Inf)                |
| COMPLICATION, SURGICAL PROCEDURE, ACCIDENTAL PUNCTURE/LACERATION, CODE ALSO INJURY BY SITE | 0                                       | 0          | 21                                         | 8.2656        | 0(0-Inf)                |
| COMPLICATION, SURGICAL PROCEDURE, ANASTOMOSIS, ARTERY                                      | 0                                       | 0          | 1                                          | 0.888         | 0(0-Inf)                |
| COMPLICATION, SURGICAL PROCEDURE, ANASTOMOSIS, BILIARY                                     | 0                                       | 0          | 1                                          | 0.4048        | 0(0-Inf)                |
| COMPLICATION, SURGICAL PROCEDURE, ANASTOMOSIS, ESOPHAGUS                                   | 2                                       | 16.7325    | 16                                         | 6.1487        | 2.7213(0.62-11.945)     |
| COMPLICATION, SURGICAL PROCEDURE, ANASTOMOSIS, G.I., NEC                                   | 1                                       | 8.2741     | 30                                         | 11.1945       | 0.7391(0.1004-5.4437)   |
| COMPLICATION, SURGICAL PROCEDURE, ANASTOMOSIS, INTESTINE                                   | 0                                       | 0          | 10                                         | 4.6869        | 0(0-Inf)                |
| COMPLICATION, SURGICAL PROCEDURE, ANASTOMOSIS, LARGE INTESTINE/COLON                       | 1                                       | 8.5779     | 18                                         | 7.1005        | 1.2081(0.1601-9.1155)   |
| COMPLICATION, SURGICAL PROCEDURE, ANASTOMOSIS, NEC                                         | 0                                       | 0          | 13                                         | 3.5551        | 0(0-Inf)                |
| COMPLICATION, SURGICAL PROCEDURE, ANASTOMOSIS, SMALL INTESTINE                             | 0                                       | 0          | 6                                          | 1.4439        | 0(0-Inf)                |
| COMPLICATION, SURGICAL PROCEDURE, ANASTOMOSIS, URETER                                      | 0                                       | 0          | 2                                          | 0.5475        | 0(0-Inf)                |
| COMPLICATION, SURGICAL PROCEDURE, DEHISCENCE                                               | 2                                       | 16.3572    | 10                                         | 2.6196        | 6.2441(1.3476-28.9312)  |
| COMPLICATION, SURGICAL PROCEDURE, FISTULA                                                  | 0                                       | 0          | 1                                          | 0.234         | 0(0-Inf)                |
| COMPLICATION, SURGICAL PROCEDURE, FROM NONABSORBABLE SURGICAL MATERIAL                     | 10                                      | 81.5747    | 135                                        | 48.2762       | 1.6897(0.8862-3.2219)   |
| COMPLICATION, SURGICAL PROCEDURE, NEC/NOS                                                  | 34                                      | 321.1045   | 813                                        | 373.5069      | 0.8597(0.6096-1.2124)   |
| COMPLICATION, SURGICAL PROCEDURE, SCOPES (ESOPHAGOSCOPY/GASTROSCOPY ETC.)                  | 1                                       | 11.7366    | 27                                         | 17.0256       | 0.6893(0.0934-5.0904)   |
| COMPLICATION, SURGICAL PROCEDURE, UNHEALED WOUND                                           | 1                                       | 7.0817     | 29                                         | 7.9996        | 0.8853(0.1199-6.5335)   |
| COMPLICATION, SURGICAL PROCEDURE, VOICE                                                    | 0                                       | 0          | 1                                          | 0.405         | 0(0-Inf)                |

| Description                                                      | No. of Positive Cases with Disease Code | Case Rate* | No. of Positive Controls with Disease Code | Control Rate* | Relative Risk (95%CI)    |
|------------------------------------------------------------------|-----------------------------------------|------------|--------------------------------------------|---------------|--------------------------|
| COMPLICATION, SURGICAL PROCEDURE, WOUND INFECTION                | 1                                       | 6.9308     | 16                                         | 3.8978        | 1.7782(0.2333-13.5522)   |
| COMPLICATION, THERAPY/THERAPEUTIC PROCEDURE, NEC                 | 0                                       | 0          | 8                                          | 3.8595        | 0(0-Inf)                 |
| COMPLICATION, TITANIUM OSSEOINTEGRATED IMPLANT                   | 2                                       | 13.9134    | 45                                         | 11.5157       | 1.2082(0.2917-5.005)     |
| COMPLICATION, TRACHEOSTOMY                                       | 1                                       | 7.5436     | 23                                         | 7.3046        | 1.0327(0.1386-7.6933)    |
| COMPLICATION, TRANSPLANT BONE MARROW                             | 0                                       | 0          | 1                                          | 0.3526        | 0(0-Inf)                 |
| COMPLICATION, TRANSPLANT HEART                                   | 0                                       | 0          | 7                                          | 1.8258        | 0(0-Inf)                 |
| COMPLICATION, TRANSPLANT KIDNEY                                  | 3                                       | 20.7549    | 15                                         | 4.04          | 5.1374(1.4699-17.9555)   |
| COMPLICATION, TRANSPLANT LIVER                                   | 2                                       | 14.786     | 4                                          | 0.8947        | 16.5264(2.9162-93.6548)  |
| COMPLICATION, TRANSPLANT ORGAN, NEC                              | 0                                       | 0          | 1                                          | 0.3526        | 0(0-Inf)                 |
| COMPLICATION, TRANSPLANT PANCREAS                                | 0                                       | 0          | 1                                          | 0.4048        | 0(0-Inf)                 |
| COMPLICATION, TRANSPLANTED ORGAN, NOS                            | 0                                       | 0          | 1                                          | 0.4751        | 0(0-Inf)                 |
| COMPLICATION, T-TUBE (OBSTRUCTION)                               | 0                                       | 0          | 4                                          | 2.4129        | 0(0-Inf)                 |
| COMPLICATION, URETHROSTOMY                                       | 0                                       | 0          | 1                                          | 2.4856        | 0(0-Inf)                 |
| COMPLICATION, URINARY DIVERSION/PROCEDURE, NEC                   | 0                                       | 0          | 3                                          | 1.2104        | 0(0-Inf)                 |
| COMPLICATION, URINARY STENT                                      | 1                                       | 13.3227    | 14                                         | 10.3937       | 1.2818(0.1677-9.7997)    |
| COMPLICATION, VACCINATION                                        | 0                                       | 0          | 4                                          | 1.3728        | 0(0-Inf)                 |
| COMPLICATION, VACCINATION REACTION                               | 0                                       | 0          | 7                                          | 1.5622        | 0(0-Inf)                 |
| COMPLICATION, VASCULAR GRAFT OR SHUNT, MECHANICAL OR MALFUNCTION | 0                                       | 0          | 17                                         | 5.8525        | 0(0-Inf)                 |
| COMPLICATION, VENIPUNCTURE                                       | 0                                       | 0          | 8                                          | 2.8812        | 0(0-Inf)                 |
| COMPLICATION, VENTRICULAR SHUNT                                  | 0                                       | 0          | 3                                          | 0.7175        | 0(0-Inf)                 |
| COMPRESSION, ARTERY                                              | 1                                       | 7.0161     | 1                                          | 0.265         | 26.4791(1.5936-439.9847) |
| COMPRESSION, BRACHIAL PLEXUS                                     | 0                                       | 0          | 2                                          | 0.5709        | 0(0-Inf)                 |
| COMPRESSION, BRAIN                                               | 0                                       | 0          | 2                                          | 0.5475        | 0(0-Inf)                 |
| COMPRESSION, BRONCHUS                                            | 0                                       | 0          | 11                                         | 3.4783        | 0(0-Inf)                 |
| COMPRESSION, CARPAL TUNNEL                                       | 0                                       | 0          | 2                                          | 0.5908        | 0(0-Inf)                 |
| COMPRESSION, CAUDA EQUINA                                        | 0                                       | 0          | 6                                          | 7.7342        | 0(0-Inf)                 |
| COMPRESSION, CORD, CERVICAL                                      | 1                                       | 7.742      | 12                                         | 4.0452        | 1.9139(0.2464-14.8683)   |
| COMPRESSION, CORD, SPINAL, NOS                                   | 1                                       | 9.829      | 30                                         | 14.6225       | 0.6722(0.0913-4.9472)    |
| COMPRESSION, CORD, THORACIC                                      | 3                                       | 34.0289    | 12                                         | 7.1571        | 4.7546(1.3278-17.0249)   |
| COMPRESSION, CRANIAL NERVE, SECOND (OPTIC)                       | 0                                       | 0          | 3                                          | 0.7175        | 0(0-Inf)                 |
| COMPRESSION, ESOPHAGUS                                           | 0                                       | 0          | 3                                          | 0.8017        | 0(0-Inf)                 |
| COMPRESSION, LUNG                                                | 0                                       | 0          | 12                                         | 4.6067        | 0(0-Inf)                 |
| COMPRESSION, MEDIAN NERVE                                        | 1                                       | 6.9952     | 17                                         | 4.3892        | 1.5937(0.2101-12.0916)   |
| COMPRESSION, NERVE NOS                                           | 2                                       | 13.941     | 29                                         | 7.7104        | 1.8081(0.4285-7.6285)    |
| COMPRESSION, NERVE, TRAUMATIC, CODE ALSO INJURY, NERVE BY SITE   | 0                                       | 0          | 2                                          | 0.5476        | 0(0-Inf)                 |
| COMPRESSION, PERIPHERAL NERVE                                    | 0                                       | 0          | 4                                          | 1.112         | 0(0-Inf)                 |
| COMPRESSION, SPINAL (ROOT), NOS                                  | 1                                       | 6.9402     | 29                                         | 7.375         | 0.941(0.1275-6.9448)     |
| COMPRESSION, STOMACH                                             | 0                                       | 0          | 3                                          | 0.9772        | 0(0-Inf)                 |

| Description                                            | No. of Positive Cases with Disease Code | Case Rate* | No. of Positive Controls with Disease Code | Control Rate* | Relative Risk (95%CI)    |
|--------------------------------------------------------|-----------------------------------------|------------|--------------------------------------------|---------------|--------------------------|
| COMPRESSION, TRACHEA                                   | 0                                       | 0          | 2                                          | 1.1613        | 0(0-Inf)                 |
| COMPRESSION, ULNAR NERVE                               | 0                                       | 0          | 29                                         | 6.7151        | 0(0-Inf)                 |
| COMPRESSION, URETER                                    | 0                                       | 0          | 5                                          | 1.7685        | 0(0-Inf)                 |
| COMPRESSION, VEIN NEC / NOS                            | 0                                       | 0          | 3                                          | 1.2104        | 0(0-Inf)                 |
| COMPRESSION, VENA CAVA, NOS                            | 0                                       | 0          | 1                                          | 0.3526        | 0(0-Inf)                 |
| COMPRESSION, VERTEBRA                                  | 7                                       | 56.5079    | 86                                         | 30.13         | 1.8755(0.8644-4.0693)    |
| COMPROMISE AIRWAY (ACUTE)                              | 0                                       | 0          | 15                                         | 6.7049        | 0(0-Inf)                 |
| COMPULSIVE, EATING                                     | 0                                       | 0          | 4                                          | 1.0399        | 0(0-Inf)                 |
| COMPULSIVE, WATER DRINKING                             | 0                                       | 0          | 1                                          | 0.234         | 0(0-Inf)                 |
| CONCHA BULLOSA                                         | 0                                       | 0          | 19                                         | 4.373         | 0(0-Inf)                 |
| CONCUSSION, BRAIN, WITHOUT SKULL FRACTURE              | 0                                       | 0          | 4                                          | 1.2621        | 0(0-Inf)                 |
| CONCUSSION, LATE EFFECT                                | 0                                       | 0          | 19                                         | 4.9079        | 0(0-Inf)                 |
| CONCUSSION, NOS                                        | 0                                       | 0          | 80                                         | 19.7579       | 0(0-Inf)                 |
| CONDYLOMA, ACUMINATUM                                  | 2                                       | 23.6016    | 66                                         | 19.98         | 1.1813(0.2884-4.838)     |
| CONDYLOMA, NOS                                         | 3                                       | 28.0277    | 90                                         | 21.9192       | 1.2787(0.4034-4.053)     |
| CONFLICT, SEE ALSO PROBLEM                             | 0                                       | 0          | 1                                          | 0.234         | 0(0-Inf)                 |
| CONFUSION, ACUTE                                       | 5                                       | 68.6818    | 58                                         | 46.2812       | 1.484(0.5935-3.7108)     |
| CONFUSION, LANGUAGE                                    | 0                                       | 0          | 3                                          | 0.7175        | 0(0-Inf)                 |
| CONFUSION, NOS                                         | 47                                      | 801.8304   | 632                                        | 664.829       | 1.2061(0.8961-1.6232)    |
| CONFUSION, POSTOPERATIVE                               | 2                                       | 38.1177    | 12                                         | 14.4799       | 2.6325(0.5859-11.8284)   |
| CONFUSION, REACTIVE                                    | 0                                       | 0          | 1                                          | 0.2354        | 0(0-Inf)                 |
| CONGESTION, BLADDER                                    | 0                                       | 0          | 3                                          | 0.8873        | 0(0-Inf)                 |
| CONGESTION, BREAST                                     | 0                                       | 0          | 1                                          | 0.398         | 0(0-Inf)                 |
| CONGESTION, BRONCHI                                    | 1                                       | 14.0265    | 1                                          | 0.8074        | 17.3718(1.0511-287.1139) |
| CONGESTION, EAR                                        | 1                                       | 7.1613     | 20                                         | 5.6336        | 1.2712(0.1693-9.5444)    |
| CONGESTION, EYE                                        | 0                                       | 0          | 2                                          | 0.5908        | 0(0-Inf)                 |
| CONGESTION, HEART, SEE ALSO FAILURE, HEART, CONGESTIVE | 0                                       | 0          | 1                                          | 2.4856        | 0(0-Inf)                 |
| CONGESTION, INTESTINE                                  | 0                                       | 0          | 5                                          | 1.265         | 0(0-Inf)                 |
| CONGESTION, KIDNEY                                     | 0                                       | 0          | 1                                          | 0.3526        | 0(0-Inf)                 |
| CONGESTION, LARYNX                                     | 0                                       | 0          | 2                                          | 0.432         | 0(0-Inf)                 |
| CONGESTION, LIVER                                      | 0                                       | 0          | 10                                         | 4.1941        | 0(0-Inf)                 |
| CONGESTION, LIVER, PASSIVE                             | 0                                       | 0          | 2                                          | 1.8982        | 0(0-Inf)                 |
| CONGESTION, NASAL                                      | 23                                      | 169.9855   | 557                                        | 166.9419      | 1.0182(0.6702-1.547)     |
| CONGESTION, NOS (RESPIRATORY SYMPTOMS #)               | 7                                       | 85.1073    | 91                                         | 60.953        | 1.3963(0.6456-3.0199)    |
| CONGESTION, PELVIC (FEMALE)                            | 1                                       | 33.2881    | 8                                          | 4.0873        | 8.1444(1.0135-65.4451)   |
| CONGESTION, PULMONARY                                  | 4                                       | 39.0282    | 50                                         | 23.9971       | 1.6264(0.5848-4.5233)    |
| CONGESTION, PULMONARY, ACUTE                           | 0                                       | 0          | 1                                          | 0.398         | 0(0-Inf)                 |
| CONGESTION, SEMINAL VESICLE                            | 0                                       | 0          | 1                                          | 0.3527        | 0(0-Inf)                 |
| CONGESTION, SINUS                                      | 7                                       | 53.0922    | 205                                        | 65.053        | 0.8161(0.3835-1.737)     |
| CONGESTION, SPLEEN, NOS                                | 0                                       | 0          | 3                                          | 0.7798        | 0(0-Inf)                 |

| Description                                                               | No. of Positive Cases with Disease Code | Case Rate* | No. of Positive Controls with Disease Code | Control Rate* | Relative Risk (95%CI)    |
|---------------------------------------------------------------------------|-----------------------------------------|------------|--------------------------------------------|---------------|--------------------------|
| CONGESTION, UTERUS, NOS                                                   | 0                                       | 0          | 1                                          | 0.398         | 0(0-Inf)                 |
| CONGESTION, VENOUS                                                        | 1                                       | 8.8458     | 15                                         | 6.2169        | 1.4229(0.1864-10.8633)   |
| CONJOINED, NERVE, SEE ALSO LESION                                         | 0                                       | 0          | 1                                          | 0.4751        | 0(0-Inf)                 |
| CONJUNCTIVITIS, ACUTE, NOS                                                | 5                                       | 34.9743    | 75                                         | 19.4704       | 1.7963(0.7231-4.4621)    |
| CONJUNCTIVITIS, ADENOVIRAL, FOLLICULAR, ACUTE                             | 0                                       | 0          | 7                                          | 1.7408        | 0(0-Inf)                 |
| CONJUNCTIVITIS, ALLERGIC--CJTA                                            | 14                                      | 98.2871    | 540                                        | 134.2466      | 0.7321(0.4302-1.2461)    |
| CONJUNCTIVITIS, ANGULAR                                                   | 0                                       | 0          | 2                                          | 0.5069        | 0(0-Inf)                 |
| CONJUNCTIVITIS, BACTERIAL--CJTB                                           | 8                                       | 56.2747    | 196                                        | 51.7337       | 1.0878(0.5352-2.2108)    |
| CONJUNCTIVITIS, CHEMICAL                                                  | 2                                       | 18.6531    | 46                                         | 11.9497       | 1.561(0.3771-6.4608)     |
| CONJUNCTIVITIS, CHRONIC, FOLLICULAR                                       | 0                                       | 0          | 1                                          | 0.2354        | 0(0-Inf)                 |
| CONJUNCTIVITIS, CHRONIC, NOS                                              | 0                                       | 0          | 25                                         | 11.4823       | 0(0-Inf)                 |
| CONJUNCTIVITIS, FOLLICULAR                                                | 3                                       | 24.5821    | 81                                         | 19.2209       | 1.2789(0.4025-4.0632)    |
| CONJUNCTIVITIS, FOLLICULAR, ACUTE                                         | 0                                       | 0          | 1                                          | 0.234         | 0(0-Inf)                 |
| CONJUNCTIVITIS, NEC                                                       | 1                                       | 8.2307     | 11                                         | 4.0497        | 2.0324(0.2593-15.9311)   |
| CONJUNCTIVITIS, NOS--CJT                                                  | 73                                      | 541.5721   | 2059                                       | 552.477       | 0.9803(0.7757-1.2388)    |
| CONJUNCTIVITIS, PAPILLARY                                                 | 0                                       | 0          | 31                                         | 7.1793        | 0(0-Inf)                 |
| CONJUNCTIVITIS, PHYSICAL, TRAUMA, CHEMICAL, ETC.                          | 0                                       | 0          | 7                                          | 3.0164        | 0(0-Inf)                 |
| CONJUNCTIVITIS, PURULENT                                                  | 0                                       | 0          | 11                                         | 2.8509        | 0(0-Inf)                 |
| CONJUNCTIVITIS, SICCA                                                     | 0                                       | 0          | 31                                         | 7.0205        | 0(0-Inf)                 |
| CONJUNCTIVITIS, STAPHYLOCOCCAL                                            | 0                                       | 0          | 11                                         | 2.6379        | 0(0-Inf)                 |
| CONJUNCTIVITIS, TRAUMATIC                                                 | 0                                       | 0          | 5                                          | 1.2019        | 0(0-Inf)                 |
| CONJUNCTIVITIS, VERNAL (SPRINGTIME)                                       | 0                                       | 0          | 2                                          | 0.4681        | 0(0-Inf)                 |
| CONJUNCTIVITIS, VIRAL, NEC                                                | 0                                       | 0          | 2                                          | 0.9504        | 0(0-Inf)                 |
| CONJUNCTIVITIS, VIRAL, NOS--CJTV                                          | 13                                      | 94.5238    | 509                                        | 120.8731      | 0.782(0.4504-1.3578)     |
| CONJUNCTOCHALASIS                                                         | 0                                       | 0          | 4                                          | 3.797         | 0(0-Inf)                 |
| CONSOLIDATION (LUNG)                                                      | 3                                       | 32.8321    | 25                                         | 14.2017       | 2.3118(0.6937-7.7043)    |
| CONSTIPATION (FUNCTIONAL)                                                 | 140                                     | 1632.767   | 2903                                       | 1665.5253     | 0.9803(0.827-1.1621)     |
| CONTACT OVERWEAR                                                          | 0                                       | 0          | 1                                          | 0.2354        | 0(0-Inf)                 |
| CONTACT WITH, AIDS                                                        | 0                                       | 0          | 1                                          | 0.234         | 0(0-Inf)                 |
| CONTACT WITH, HEPATITIS                                                   | 0                                       | 0          | 8                                          | 2.6441        | 0(0-Inf)                 |
| CONTACT WITH, INFECTIVE DISEASE, NEC                                      | 4                                       | 27.8913    | 94                                         | 23.1361       | 1.2055(0.4416-3.2907)    |
| CONTACT WITH, OCCUPATIONAL EXPOSURE (INCLUDE CONTAMINATED MATERIALS), NOS | 3                                       | 23.2196    | 30                                         | 7.1027        | 3.2691(0.9888-10.8085)   |
| CONTACT WITH, PARASITIC DISEASE                                           | 0                                       | 0          | 4                                          | 0.8642        | 0(0-Inf)                 |
| CONTACT WITH, RABIES                                                      | 0                                       | 0          | 4                                          | 1.1114        | 0(0-Inf)                 |
| CONTACT WITH, TUBERCULOSIS                                                | 1                                       | 7.2088     | 30                                         | 6.8995        | 1.0448(0.1416-7.7085)    |
| CONTACT WITH, VENEREAL DISEASE, NEC                                       | 1                                       | 21.9192    | 1                                          | 0.526         | 41.6703(2.5255-687.5505) |
| CONTRACTION, ACHILLES TENDON, NOS                                         | 1                                       | 6.969      | 20                                         | 4.8044        | 1.4505(0.1931-10.8949)   |
| CONTRACTION, ANUS                                                         | 0                                       | 0          | 17                                         | 4.0038        | 0(0-Inf)                 |
| CONTRACTION, BLADDER NECK                                                 | 3                                       | 33.2405    | 85                                         | 49.58         | 0.6704(0.2116-2.1239)    |



| Description                                 | No. of Positive Cases with Disease Code | Case Rate* | No. of Positive Controls with Disease Code | Control Rate* | Relative Risk (95%CI)    |
|---------------------------------------------|-----------------------------------------|------------|--------------------------------------------|---------------|--------------------------|
| CONTRACTION, BLADDER, NOS                   | 1                                       | 14.2633    | 8                                          | 6.5878        | 2.1651(0.2684-17.466)    |
| CONTRACTION, COLON                          | 1                                       | 9.1896     | 1                                          | 0.4524        | 20.314(1.228-336.0357)   |
| CONTRACTION, DUPUYTREN'S                    | 13                                      | 96.8807    | 330                                        | 102.5357      | 0.9448(0.5421-1.6468)    |
| CONTRACTION, ESOPHAGEAL RING                | 0                                       | 0          | 3                                          | 0.8457        | 0(0-Inf)                 |
| CONTRACTION, ESOPHAGOGASTRIC JUNCTION       | 0                                       | 0          | 3                                          | 1.9034        | 0(0-Inf)                 |
| CONTRACTION, ESOPHAGUS, NOS                 | 0                                       | 0          | 8                                          | 4.8301        | 0(0-Inf)                 |
| CONTRACTION, EXTENSION, JOINT               | 0                                       | 0          | 8                                          | 1.8882        | 0(0-Inf)                 |
| CONTRACTION, FLEXION, JOINT                 | 3                                       | 24.7857    | 114                                        | 42.3564       | 0.5852(0.1856-1.8452)    |
| CONTRACTION, GALLBLADDER, HOURGLASS, NOS    | 0                                       | 0          | 1                                          | 0.8877        | 0(0-Inf)                 |
| CONTRACTION, JOINT                          | 4                                       | 33.2329    | 106                                        | 39.6202       | 0.8388(0.3083-2.282)     |
| CONTRACTION, LID                            | 1                                       | 7.6091     | 5                                          | 1.2057        | 6.3111(0.7187-55.42)     |
| CONTRACTION, LUNG                           | 0                                       | 0          | 1                                          | 0.4751        | 0(0-Inf)                 |
| CONTRACTION, MUSCLE, EYE (EXTRINSIC)        | 1                                       | 13.17      | 9                                          | 6.8373        | 1.9262(0.2419-15.3409)   |
| CONTRACTION, MUSCLE, FLACCID                | 0                                       | 0          | 1                                          | 0.234         | 0(0-Inf)                 |
| CONTRACTION, MUSCLE, NOS                    | 4                                       | 35.193     | 72                                         | 29.6067       | 1.1887(0.4328-3.2649)    |
| CONTRACTION, PALMAR                         | 0                                       | 0          | 4                                          | 1.9321        | 0(0-Inf)                 |
| CONTRACTION, PROSTATE                       | 0                                       | 0          | 1                                          | 2.4873        | 0(0-Inf)                 |
| CONTRACTION, SIGMOID                        | 0                                       | 0          | 1                                          | 0.234         | 0(0-Inf)                 |
| CONTRACTION, STOMACH, NOS                   | 0                                       | 0          | 3                                          | 0.741         | 0(0-Inf)                 |
| CONTRACTION, TENDON                         | 0                                       | 0          | 7                                          | 1.6868        | 0(0-Inf)                 |
| CONTRACTION, URETHRA                        | 0                                       | 0          | 2                                          | 2.9812        | 0(0-Inf)                 |
| CONTRACTION, VAGINA                         | 0                                       | 0          | 1                                          | 0.4049        | 0(0-Inf)                 |
| CONTRACTION, VESICAL NECK                   | 4                                       | 37.3691    | 45                                         | 20.4813       | 1.8245(0.654-5.0904)     |
| CONTRACTION, VISUAL, GENERAL                | 0                                       | 0          | 1                                          | 0.234         | 0(0-Inf)                 |
| CONTUSION, ABDOMINAL WALL                   | 1                                       | 6.9749     | 51                                         | 13.3847       | 0.5211(0.0718-3.7829)    |
| CONTUSION, ACHILLES TENDON                  | 0                                       | 0          | 5                                          | 1.2805        | 0(0-Inf)                 |
| CONTUSION, ANKLE                            | 2                                       | 13.8883    | 144                                        | 36.0097       | 0.3857(0.0954-1.5595)    |
| CONTUSION, ARM                              | 11                                      | 81.6017    | 172                                        | 51.0402       | 1.5988(0.8666-2.9495)    |
| CONTUSION, AXILLA                           | 0                                       | 0          | 3                                          | 2.8229        | 0(0-Inf)                 |
| CONTUSION, BACK                             | 11                                      | 77.0412    | 275                                        | 69.5122       | 1.1083(0.6055-2.0288)    |
| CONTUSION, BRAIN                            | 0                                       | 0          | 37                                         | 11.6051       | 0(0-Inf)                 |
| CONTUSION, BRAIN, LATE EFFECT               | 1                                       | 6.9691     | 2                                          | 0.5036        | 13.8387(1.2043-159.0191) |
| CONTUSION, BREAST                           | 0                                       | 0          | 32                                         | 14.9503       | 0(0-Inf)                 |
| CONTUSION, BUTTOCK                          | 5                                       | 35.9252    | 171                                        | 48.1765       | 0.7457(0.3058-1.8183)    |
| CONTUSION, CALF                             | 2                                       | 14.8054    | 82                                         | 19.399        | 0.7632(0.1872-3.1118)    |
| CONTUSION, CHEEK                            | 1                                       | 13.8893    | 12                                         | 5.4515        | 2.5478(0.3263-19.894)    |
| CONTUSION, CHEST                            | 15                                      | 106.1004   | 160                                        | 39.1196       | 2.7122(1.5918-4.6213)    |
| CONTUSION, CHEST WALL (RIB, PECTORIS MAJOR) | 30                                      | 220.5178   | 784                                        | 228.5828      | 0.9647(0.6693-1.3906)    |
| CONTUSION, COCCYX                           | 1                                       | 8.4416     | 34                                         | 13.1849       | 0.6402(0.0873-4.6974)    |
| CONTUSION, ELBOW                            | 11                                      | 77.5095    | 315                                        | 76.7207       | 1.0103(0.5528-1.8463)    |

| Description                                          | No. of Positive Cases with Disease Code | Case Rate* | No. of Positive Controls with Disease Code | Control Rate* | Relative Risk (95%CI)  |
|------------------------------------------------------|-----------------------------------------|------------|--------------------------------------------|---------------|------------------------|
| CONTUSION, EYE                                       | 1                                       | 10.9059    | 14                                         | 8.0321        | 1.3578(0.1772-10.4022) |
| CONTUSION, FACE                                      | 9                                       | 73.0229    | 184                                        | 65.9372       | 1.1075(0.5658-2.1675)  |
| CONTUSION, FINGER                                    | 10                                      | 78.8049    | 293                                        | 69.6526       | 1.1314(0.6013-2.1288)  |
| CONTUSION, FLANK                                     | 2                                       | 13.939     | 51                                         | 13.8275       | 1.0081(0.2445-4.1565)  |
| CONTUSION, FOOT                                      | 11                                      | 82.9786    | 448                                        | 105.8306      | 0.7841(0.4305-1.428)   |
| CONTUSION, FOREARM                                   | 9                                       | 62.996     | 175                                        | 44.2665       | 1.4231(0.7263-2.7885)  |
| CONTUSION, FOREHEAD                                  | 5                                       | 41.5962    | 176                                        | 65.472        | 0.6353(0.2607-1.5483)  |
| CONTUSION, GROIN                                     | 0                                       | 0          | 16                                         | 7.1198        | 0(0-Inf)               |
| CONTUSION, GUM                                       | 0                                       | 0          | 4                                          | 1.9298        | 0(0-Inf)               |
| CONTUSION, HAND                                      | 16                                      | 112.6685   | 400                                        | 98.9373       | 1.1388(0.6897-1.8802)  |
| CONTUSION, HEAD                                      | 11                                      | 86.1464    | 236                                        | 78.5037       | 1.0974(0.5983-2.0127)  |
| CONTUSION, HIP                                       | 21                                      | 178.4847   | 380                                        | 145.0577      | 1.2304(0.7917-1.9124)  |
| CONTUSION, KNEE                                      | 47                                      | 345.0126   | 809                                        | 208.0737      | 1.6581(1.234-2.228)    |
| CONTUSION, LABIA                                     | 0                                       | 0          | 1                                          | 0.4048        | 0(0-Inf)               |
| CONTUSION, LARYNX / VOCAL CORD                       | 0                                       | 0          | 1                                          | 0.8878        | 0(0-Inf)               |
| CONTUSION, LEG                                       | 17                                      | 123.2225   | 525                                        | 149.7406      | 0.8229(0.507-1.3355)   |
| CONTUSION, LIP                                       | 1                                       | 7.4927     | 12                                         | 3.7515        | 1.9972(0.2568-15.5332) |
| CONTUSION, LOWER EXTREMITY                           | 0                                       | 0          | 118                                        | 35.9476       | 0(0-Inf)               |
| CONTUSION, LOWER EXTREMITY, LATE EFFECT              | 0                                       | 0          | 4                                          | 1.3737        | 0(0-Inf)               |
| CONTUSION, MULTIPLE SITES                            | 5                                       | 47.7628    | 100                                        | 46.6207       | 1.0245(0.4162-2.5219)  |
| CONTUSION, NECK                                      | 1                                       | 7.051      | 18                                         | 4.3144        | 1.6343(0.2162-12.3518) |
| CONTUSION, NERVE, CODE ALSO INJURY, NERVE BY SITE    | 0                                       | 0          | 16                                         | 4.5361        | 0(0-Inf)               |
| CONTUSION, NOS, LATE EFFECT                          | 0                                       | 0          | 3                                          | 0.741         | 0(0-Inf)               |
| CONTUSION, NOS, SEE ALSO INJURY, SUPERFICIAL BY SITE | 14                                      | 107.9979   | 273                                        | 87.9368       | 1.2281(0.7164-2.1054)  |
| CONTUSION, NOSE                                      | 5                                       | 34.659     | 73                                         | 17.4724       | 1.9836(0.7973-4.935)   |
| CONTUSION, ORBIT                                     | 2                                       | 22.441     | 42                                         | 25.0051       | 0.8975(0.2165-3.7202)  |
| CONTUSION, PENIS                                     | 0                                       | 0          | 1                                          | 0.8878        | 0(0-Inf)               |
| CONTUSION, PULMONARY                                 | 1                                       | 6.9381     | 20                                         | 5.1542        | 1.3461(0.1793-10.1053) |
| CONTUSION, SCALP                                     | 2                                       | 13.9163    | 94                                         | 23.2003       | 0.5998(0.1475-2.4397)  |
| CONTUSION, SCAPULA                                   | 0                                       | 0          | 15                                         | 3.7256        | 0(0-Inf)               |
| CONTUSION, SCROTUM                                   | 0                                       | 0          | 3                                          | 1.8405        | 0(0-Inf)               |
| CONTUSION, SHOULDER                                  | 18                                      | 130.0591   | 377                                        | 107.0745      | 1.2147(0.7557-1.9523)  |
| CONTUSION, SPINAL CORD, CONUS MEDULLARIS             | 0                                       | 0          | 1                                          | 0.3527        | 0(0-Inf)               |
| CONTUSION, SPINE, CAUDA EQUINA                       | 0                                       | 0          | 1                                          | 0.3528        | 0(0-Inf)               |
| CONTUSION, TESTIS                                    | 0                                       | 0          | 1                                          | 0.8879        | 0(0-Inf)               |
| CONTUSION, THIGH                                     | 10                                      | 69.8453    | 212                                        | 53.2211       | 1.3124(0.6944-2.4803)  |
| CONTUSION, TOE                                       | 4                                       | 29.0259    | 263                                        | 62.8619       | 0.4617(0.1718-1.241)   |
| CONTUSION, TRUNK                                     | 3                                       | 33.8927    | 23                                         | 13.7824       | 2.4591(0.7332-8.2472)  |
| CONTUSION, UPPER EXTREMITY                           | 3                                       | 22.0407    | 42                                         | 12.5717       | 1.7532(0.5402-5.6899)  |
| CONTUSION, UPPER EXTREMITY, LATE EFFECT              | 0                                       | 0          | 1                                          | 0.4049        | 0(0-Inf)               |

| Description                                   | No. of Positive Cases with Disease Code | Case Rate* | No. of Positive Controls with Disease Code | Control Rate* | Relative Risk (95%CI)    |
|-----------------------------------------------|-----------------------------------------|------------|--------------------------------------------|---------------|--------------------------|
| CONTUSION, VAGINA                             | 0                                       | 0          | 1                                          | 0.2354        | 0(0-Inf)                 |
| CONTUSION, WRIST                              | 9                                       | 63.2079    | 206                                        | 50.1268       | 1.261(0.6453-2.464)      |
| CONVERSION SEE ALSO REACTION                  | 0                                       | 0          | 2                                          | 0.8097        | 0(0-Inf)                 |
| CONVULSION, NOS, SEE ALSO SEIZURE OR EPILEPSY | 0                                       | 0          | 5                                          | 1.3717        | 0(0-Inf)                 |
| COPD (CHRONIC OBSTRUCTIVE PULMONARY DISEASE)  | 94                                      | 1051.003   | 1777                                       | 985.2414      | 1.0667(0.8665-1.3133)    |
| COR PULMONALE, CHRONIC                        | 0                                       | 0          | 1                                          | 0.3526        | 0(0-Inf)                 |
| COR PULMONALE, NOS                            | 5                                       | 53.9963    | 107                                        | 59.8512       | 0.9022(0.3672-2.2167)    |
| COR PULMONALE, SECONDARY                      | 0                                       | 0          | 3                                          | 2.0938        | 0(0-Inf)                 |
| CORD BLADDER                                  | 0                                       | 0          | 1                                          | 0.4751        | 0(0-Inf)                 |
| CORECTOPIA, ACQUIRED                          | 0                                       | 0          | 2                                          | 4.9728        | 0(0-Inf)                 |
| CORECTOPIA, CONGENITAL                        | 0                                       | 0          | 1                                          | 0.234         | 0(0-Inf)                 |
| CORKSCREW ESOPHAGUS                           | 1                                       | 33.9867    | 2                                          | 4.9413        | 6.8781(0.6199-76.3191)   |
| CORN                                          | 51                                      | 445.2092   | 1141                                       | 440.5205      | 1.0106(0.7628-1.339)     |
| CORNU CUTANEUM                                | 0                                       | 0          | 2                                          | 0.7053        | 0(0-Inf)                 |
| CORPUS, ALBICANS                              | 0                                       | 0          | 4                                          | 0.884         | 0(0-Inf)                 |
| CORPUS, ALBICANTIA                            | 0                                       | 0          | 8                                          | 1.957         | 0(0-Inf)                 |
| CORYZA, ACUTE                                 | 0                                       | 0          | 1                                          | 0.4751        | 0(0-Inf)                 |
| CORYZA, NOS                                   | 1                                       | 6.9662     | 43                                         | 10.4703       | 0.6653(0.0913-4.8505)    |
| COSTOCHONDRITIS, NOS                          | 18                                      | 132.32     | 533                                        | 123.9121      | 1.0679(0.6666-1.7105)    |
| COUGH, ASTHMATIC                              | 0                                       | 0          | 4                                          | 1.3628        | 0(0-Inf)                 |
| COUGH, BRONCHOSPASTIC (BRONCHIAL)             | 4                                       | 29.0965    | 53                                         | 15.4253       | 1.8863(0.6789-5.2408)    |
| COUGH, CHRONIC                                | 33                                      | 264.5739   | 943                                        | 325.7264      | 0.8123(0.5735-1.1503)    |
| COUGH, FUNCTIONAL                             | 0                                       | 0          | 3                                          | 0.9638        | 0(0-Inf)                 |
| COUGH, HABIT                                  | 5                                       | 36.8537    | 116                                        | 27.1076       | 1.3595(0.5536-3.3389)    |
| COUGH, NOS                                    | 173                                     | 1565.512   | 4540                                       | 1836.9157     | 0.8523(0.7319-0.9924)    |
| COUGH, SMOKER'S                               | 0                                       | 0          | 10                                         | 2.8548        | 0(0-Inf)                 |
| COUNSELING, GENETIC                           | 0                                       | 0          | 3                                          | 0.7022        | 0(0-Inf)                 |
| COUNSELING, NOS                               | 3                                       | 21.0253    | 238                                        | 57.2467       | 0.3673(0.1175-1.1483)    |
| COXA, VARA, NOS                               | 1                                       | 7.1635     | 1                                          | 0.3095        | 23.1475(1.3946-384.1975) |
| COXALGIA                                      | 0                                       | 0          | 2                                          | 1.1979        | 0(0-Inf)                 |
| COXARTHROSIS                                  | 14                                      | 121.6026   | 244                                        | 97.3717       | 1.2489(0.7274-2.1442)    |
| CRADLE CAP                                    | 0                                       | 0          | 2                                          | 0.8096        | 0(0-Inf)                 |
| CRAMP, ABDOMINAL                              | 5                                       | 35.7761    | 174                                        | 47.9718       | 0.7458(0.3059-1.8183)    |
| CRAMP, HEAT                                   | 0                                       | 0          | 2                                          | 0.5069        | 0(0-Inf)                 |
| CRAMP, LEG, NOCTURNAL                         | 15                                      | 120.297    | 295                                        | 101.0413      | 1.1906(0.7073-2.0039)    |
| CRAMP, LEG, NOS                               | 12                                      | 109.0102   | 275                                        | 118.2444      | 0.9219(0.5164-1.6459)    |
| CRAMP, MENSTRUAL, SEE ALSO DYSMENORRHEA       | 0                                       | 0          | 1                                          | 0.234         | 0(0-Inf)                 |
| CRAMP, MUSCLE                                 | 3                                       | 22.0616    | 177                                        | 52.8004       | 0.4178(0.1333-1.31)      |
| CRAMP, NOS                                    | 2                                       | 14.368     | 93                                         | 26.2381       | 0.5476(0.1346-2.2275)    |
| CRAMP, UTERINE                                | 0                                       | 0          | 1                                          | 0.4048        | 0(0-Inf)                 |

| Description                                                                                 | No. of Positive Cases with Disease Code | Case Rate* | No. of Positive Controls with Disease Code | Control Rate* | Relative Risk (95%CI)    |
|---------------------------------------------------------------------------------------------|-----------------------------------------|------------|--------------------------------------------|---------------|--------------------------|
| CRAMP, WRITER'S                                                                             | 1                                       | 6.9929     | 10                                         | 2.5048        | 2.7918(0.3527-22.0995)   |
| CRANIOPHARYNGIOMA, NOS                                                                      | 0                                       | 0          | 2                                          | 0.4709        | 0(0-Inf)                 |
| CREAKING JOINT                                                                              | 0                                       | 0          | 1                                          | 0.2354        | 0(0-Inf)                 |
| CREPITUS, JOINT                                                                             | 1                                       | 7.0368     | 43                                         | 11.5592       | 0.6088(0.0835-4.4374)    |
| CRISIS, BLAST                                                                               | 0                                       | 0          | 4                                          | 1.1417        | 0(0-Inf)                 |
| CRISIS, HYPERTENSIVE                                                                        | 0                                       | 0          | 14                                         | 7.9596        | 0(0-Inf)                 |
| CRISIS, OCULOGYRIC                                                                          | 0                                       | 0          | 1                                          | 0.8877        | 0(0-Inf)                 |
| CROWDING TEETH                                                                              | 0                                       | 0          | 2                                          | 0.4708        | 0(0-Inf)                 |
| CRUSTS, NOSE                                                                                | 1                                       | 8.5784     | 44                                         | 17.3461       | 0.4945(0.0679-3.6007)    |
| CRUSTS, SKIN                                                                                | 4                                       | 33.0629    | 126                                        | 46.9493       | 0.7042(0.2597-1.9093)    |
| CRYOGLOBULINEMIA                                                                            | 0                                       | 0          | 1                                          | 0.8528        | 0(0-Inf)                 |
| CRYPT (ANAL)                                                                                | 1                                       | 8.8405     | 1                                          | 0.2902        | 30.4606(1.8354-505.5362) |
| CRYPTIC TONSIL(S)                                                                           | 0                                       | 0          | 5                                          | 1.1787        | 0(0-Inf)                 |
| CRYPTITIS (ANAL/RECTAL#)                                                                    | 0                                       | 0          | 9                                          | 2.2209        | 0(0-Inf)                 |
| CRYPTOCOCCOSIS                                                                              | 0                                       | 0          | 1                                          | 0.8877        | 0(0-Inf)                 |
| CRYPTOPENIS (CONCEALED)                                                                     | 0                                       | 0          | 2                                          | 1.0782        | 0(0-Inf)                 |
| CRYPTORCHISM                                                                                | 0                                       | 0          | 2                                          | 0.6774        | 0(0-Inf)                 |
| CRYSTAL DEPOSIT (ARTHRITIS#)                                                                | 0                                       | 0          | 2                                          | 0.4709        | 0(0-Inf)                 |
| CUPPING OPTIC DISK                                                                          | 0                                       | 0          | 45                                         | 19.4426       | 0(0-Inf)                 |
| CUPULOLITHIASIS                                                                             | 0                                       | 0          | 3                                          | 0.9773        | 0(0-Inf)                 |
| CURVATURE, NAIL                                                                             | 0                                       | 0          | 45                                         | 15.0449       | 0(0-Inf)                 |
| CURVATURE, PENILE, LATERAL (CONGENITAL)                                                     | 0                                       | 0          | 3                                          | 0.9284        | 0(0-Inf)                 |
| CURVATURE, PENILE, NOS                                                                      | 0                                       | 0          | 11                                         | 6.5714        | 0(0-Inf)                 |
| CURVATURE, SPINE, NOS                                                                       | 1                                       | 7.5249     | 8                                          | 2.4924        | 3.0192(0.371-24.5711)    |
| CUSHINGOID DUE TO STEROIDS                                                                  | 0                                       | 0          | 10                                         | 3.1108        | 0(0-Inf)                 |
| CUTIS, LAXA, CONGENITAL                                                                     | 0                                       | 0          | 1                                          | 0.398         | 0(0-Inf)                 |
| CUTIS, MARMORATA                                                                            | 1                                       | 7.0224     | 4                                          | 1.0517        | 6.6775(0.7221-61.7477)   |
| CYANOSIS, NOS                                                                               | 2                                       | 23.049     | 23                                         | 14.1442       | 1.6296(0.382-6.9515)     |
| CYCLITIS, HETEROCHROMIC, FUCHS                                                              | 0                                       | 0          | 8                                          | 1.9506        | 0(0-Inf)                 |
| CYCLITIS, NOS                                                                               | 0                                       | 0          | 1                                          | 0.398         | 0(0-Inf)                 |
| CYCLITIS, WITH GLAUCOMA                                                                     | 0                                       | 0          | 3                                          | 0.961         | 0(0-Inf)                 |
| CYCLOTHYMIA, NEC/NOS                                                                        | 0                                       | 0          | 3                                          | 1.1478        | 0(0-Inf)                 |
| CYLINDROMA, EXTERNAL AREA OR SITE, CODE ALSO NEOPLASM BENIGN BY SITE (USE FOR DERM/SKIN DX) | 1                                       | 7.3601     | 11                                         | 2.5114        | 2.9307(0.3727-23.0466)   |
| CYLINDROMA, NOS, CODE ALSO NEOPLASM, MALIGNANT BY SITE                                      | 0                                       | 0          | 7                                          | 1.6273        | 0(0-Inf)                 |
| CYST, ADNEXA                                                                                | 2                                       | 28.2758    | 48                                         | 25.8067       | 1.0957(0.2649-4.5322)    |
| CYST, ADRENAL                                                                               | 0                                       | 0          | 3                                          | 1.5112        | 0(0-Inf)                 |
| CYST, ALVEOLAR PROCESS                                                                      | 1                                       | 7.2165     | 2                                          | 0.4643        | 15.5429(1.3411-180.1367) |
| CYST, ANTRUM                                                                                | 2                                       | 17.2941    | 13                                         | 3.4324        | 5.0385(1.122-22.6255)    |
| CYST, ANUS                                                                                  | 0                                       | 0          | 13                                         | 3.0633        | 0(0-Inf)                 |

| Description                               | No. of Positive Cases with Disease Code | Case Rate* | No. of Positive Controls with Disease Code | Control Rate* | Relative Risk (95%CI)    |
|-------------------------------------------|-----------------------------------------|------------|--------------------------------------------|---------------|--------------------------|
| CYST, APPENDIX                            | 0                                       | 0          | 1                                          | 0.398         | 0(0-Inf)                 |
| CYST, ARACHNOID (BRAIN #)                 | 0                                       | 0          | 15                                         | 4.3041        | 0(0-Inf)                 |
| CYST, AURICLE                             | 0                                       | 0          | 17                                         | 4.8834        | 0(0-Inf)                 |
| CYST, AXILLA                              | 4                                       | 34.3922    | 69                                         | 27.2944       | 1.26(0.4582-3.4654)      |
| CYST, BAKER'S (KNEE)                      | 11                                      | 82.6837    | 289                                        | 89.5125       | 0.9237(0.505-1.6896)     |
| CYST, BARTHOLIN'S GLAND                   | 2                                       | 39.1184    | 75                                         | 35.4648       | 1.103(0.27-4.506)        |
| CYST, BILE DUCT                           | 0                                       | 0          | 1                                          | 2.4873        | 0(0-Inf)                 |
| CYST, BLADDER                             | 0                                       | 0          | 13                                         | 4.2701        | 0(0-Inf)                 |
| CYST, BONE, ANEURYSMAL, CODE ALSO BY SITE | 0                                       | 0          | 3                                          | 1.0728        | 0(0-Inf)                 |
| CYST, BONE, HEAD OR NECK (EXCEPT JAW)     | 0                                       | 0          | 1                                          | 0.2729        | 0(0-Inf)                 |
| CYST, BONE, HIP                           | 1                                       | 7.1925     | 20                                         | 4.7547        | 1.5127(0.2014-11.3633)   |
| CYST, BONE, LOWER EXTREMITY               | 0                                       | 0          | 9                                          | 2.221         | 0(0-Inf)                 |
| CYST, BONE, NOS                           | 0                                       | 0          | 3                                          | 0.8018        | 0(0-Inf)                 |
| CYST, BONE, TRUNK                         | 0                                       | 0          | 4                                          | 0.9418        | 0(0-Inf)                 |
| CYST, BONE, UPPER EXTREMITY               | 1                                       | 9.3368     | 10                                         | 2.4785        | 3.7671(0.4748-29.8907)   |
| CYST, BRAIN                               | 1                                       | 6.964      | 12                                         | 3.1832        | 2.1878(0.2812-17.0217)   |
| CYST, BRANCHIAL                           | 0                                       | 0          | 1                                          | 0.3526        | 0(0-Inf)                 |
| CYST, BRANCHIAL, CLEFT                    | 0                                       | 0          | 12                                         | 3.0592        | 0(0-Inf)                 |
| CYST, BREAST                              | 12                                      | 102.1455   | 552                                        | 126.0606      | 0.8103(0.4568-1.4373)    |
| CYST, BREAST, BLUE DOME                   | 0                                       | 0          | 2                                          | 0.432         | 0(0-Inf)                 |
| CYST, BROAD LIGAMENT                      | 0                                       | 0          | 1                                          | 0.2354        | 0(0-Inf)                 |
| CYST, BRONCHOGENIC (CONGENITAL)           | 0                                       | 0          | 4                                          | 1.0139        | 0(0-Inf)                 |
| CYST, BRONCHUS                            | 0                                       | 0          | 1                                          | 0.4048        | 0(0-Inf)                 |
| CYST, BUCCAL                              | 0                                       | 0          | 9                                          | 2.0057        | 0(0-Inf)                 |
| CYST, BURSA, KNEE                         | 0                                       | 0          | 1                                          | 0.2354        | 0(0-Inf)                 |
| CYST, CANTHUS                             | 1                                       | 7.1222     | 64                                         | 17.92         | 0.3974(0.055-2.872)      |
| CYST, CERVIX, NOS                         | 0                                       | 0          | 48                                         | 29.1144       | 0(0-Inf)                 |
| CYST, CHEST WALL, SOFT TISSUE             | 0                                       | 0          | 1                                          | 0.4048        | 0(0-Inf)                 |
| CYST, CHOCOLATE (OVARY#)                  | 0                                       | 0          | 4                                          | 1.3526        | 0(0-Inf)                 |
| CYST, COCCYX                              | 0                                       | 0          | 1                                          | 0.4049        | 0(0-Inf)                 |
| CYST, COLLOID CODE ALSO CYST BY SITE      | 0                                       | 0          | 2                                          | 0.4708        | 0(0-Inf)                 |
| CYST, COLON                               | 1                                       | 6.9992     | 2                                          | 0.4456        | 15.7083(1.3473-183.1448) |
| CYST, COMEDO                              | 0                                       | 0          | 1                                          | 0.888         | 0(0-Inf)                 |
| CYST, CONJUNCTIVAL                        | 5                                       | 35.681     | 80                                         | 18.7752       | 1.9004(0.7664-4.7126)    |
| CYST, CORPUS LUTEUM                       | 2                                       | 79.9233    | 66                                         | 47.7826       | 1.6726(0.409-6.8409)     |
| CYST, CORPUS LUTEUM, HEMORRHAGIC          | 0                                       | 0          | 25                                         | 21.0798       | 0(0-Inf)                 |
| CYST, CORPUS LUTEUM, OLD                  | 0                                       | 0          | 3                                          | 0.9639        | 0(0-Inf)                 |
| CYST, CORPUS LUTEUM, PERSISTENT           | 0                                       | 0          | 1                                          | 0.398         | 0(0-Inf)                 |
| CYST, CORPUS LUTEUM, RUPTURED             | 0                                       | 0          | 6                                          | 3.0219        | 0(0-Inf)                 |
| CYST, CUL DE SAC                          | 0                                       | 0          | 1                                          | 0.2354        | 0(0-Inf)                 |

| Description                                      | No. of Positive Cases with Disease Code | Case Rate* | No. of Positive Controls with Disease Code | Control Rate* | Relative Risk (95%CI)  |
|--------------------------------------------------|-----------------------------------------|------------|--------------------------------------------|---------------|------------------------|
| CYST, DENTAL ROOT                                | 0                                       | 0          | 7                                          | 1.7144        | 0(0-Inf)               |
| CYST, DENTIGEROUS                                | 3                                       | 21.7503    | 27                                         | 6.7138        | 3.2396(0.9748-10.7667) |
| CYST, DERMOID, NOS, CODE ALSO NEO BENIGN BY SITE | 0                                       | 0          | 8                                          | 4.7119        | 0(0-Inf)               |
| CYST, DERMOID, OVARY, NOS                        | 0                                       | 0          | 20                                         | 5.0865        | 0(0-Inf)               |
| CYST, DERMOID, SKIN                              | 0                                       | 0          | 3                                          | 0.7175        | 0(0-Inf)               |
| CYST, DUPLICATION, CODE ALSO BY SITE             | 0                                       | 0          | 2                                          | 2.9786        | 0(0-Inf)               |
| CYST, EAR, CODE ALSO TYPE IF STATED              | 4                                       | 27.853     | 138                                        | 34.4126       | 0.8094(0.2989-2.1921)  |
| CYST, ENDOMETRIUM (IF ECTOPIC SEE ENDOMETRIOSIS) | 0                                       | 0          | 73                                         | 40.5609       | 0(0-Inf)               |
| CYST, EPIDERMOID, (NEOPLASM BENIGN SKIN#)        | 2                                       | 15.8102    | 56                                         | 19.748        | 0.8006(0.1948-3.2906)  |
| CYST, EPIDERMOID, SKIN, CODE ALSO CYST BY SITE   | 39                                      | 282.8521   | 1122                                       | 311.7963      | 0.9072(0.6587-1.2494)  |
| CYST, EPIDIDYMIS                                 | 4                                       | 27.8479    | 47                                         | 13.5302       | 2.0582(0.7386-5.7354)  |
| CYST, EPIGLOTTIS                                 | 0                                       | 0          | 11                                         | 2.9761        | 0(0-Inf)               |
| CYST, EPITHELIAL, SKIN, CODE ALSO CYST BY SITE   | 3                                       | 21.5626    | 101                                        | 29.1417       | 0.7399(0.2341-2.3387)  |
| CYST, EXTREMITY, LOWER, CODE ALSO CYST BY TYPE   | 4                                       | 28.8945    | 185                                        | 44.5346       | 0.6488(0.2405-1.75)    |
| CYST, EXTREMITY, NOS, CODE ALSO CYST BY TYPE     | 0                                       | 0          | 2                                          | 0.5069        | 0(0-Inf)               |
| CYST, EXTREMITY, UPPER, CODE ALSO CYST BY TYPE   | 17                                      | 120.45     | 499                                        | 124.942       | 0.964(0.5937-1.5654)   |
| CYST, EYE                                        | 1                                       | 8.2199     | 37                                         | 13.6719       | 0.6012(0.0822-4.3977)  |
| CYST, EYELID                                     | 8                                       | 56.2087    | 295                                        | 77.5794       | 0.7245(0.3584-1.4647)  |
| CYST, EYELID, INFECTED                           | 0                                       | 0          | 4                                          | 1.1114        | 0(0-Inf)               |
| CYST, FALLOPIAN TUBE                             | 5                                       | 77.7005    | 101                                        | 43.9561       | 1.7677(0.7172-4.3569)  |
| CYST, GANGLION, LOWER EXTREMITY                  | 3                                       | 25.3986    | 161                                        | 39.233        | 0.6474(0.2062-2.0322)  |
| CYST, GANGLION, NOS                              | 2                                       | 15.276     | 95                                         | 30.583        | 0.4995(0.1228-2.0309)  |
| CYST, GANGLION, UPPER EXTREMITY                  | 10                                      | 70.9989    | 313                                        | 74.7163       | 0.9502(0.5054-1.7867)  |
| CYST, GANGLION, WRIST                            | 9                                       | 67.5352    | 246                                        | 57.5178       | 1.1742(0.6024-2.2885)  |
| CYST, GARTNER'S DUCT                             | 0                                       | 0          | 6                                          | 2.3894        | 0(0-Inf)               |
| CYST, GASTRIC                                    | 0                                       | 0          | 2                                          | 0.7052        | 0(0-Inf)               |
| CYST, GENITAL, FEMALE                            | 1                                       | 13.8477    | 11                                         | 5.4029        | 2.563(0.3257-20.1701)  |
| CYST, GINGIVA                                    | 0                                       | 0          | 8                                          | 2.0551        | 0(0-Inf)               |
| CYST, HEAD, CODE ALSO CYST BY TYPE               | 31                                      | 224.2892   | 830                                        | 206.7316      | 1.0849(0.7572-1.5544)  |
| CYST, HYDATID, FALLOPIAN TUBES                   | 0                                       | 0          | 3                                          | 0.8036        | 0(0-Inf)               |
| CYST, HYDATID, OF MORGAGNI                       | 0                                       | 0          | 6                                          | 1.9286        | 0(0-Inf)               |
| CYST, INCLUSION, CODE ALSO CYST BY SITE          | 9                                       | 64.8657    | 374                                        | 107.25        | 0.6048(0.3119-1.1729)  |
| CYST, INTERNAL EAR, NEC                          | 0                                       | 0          | 3                                          | 1.2106        | 0(0-Inf)               |
| CYST, INTRATHORACIC                              | 0                                       | 0          | 2                                          | 0.4853        | 0(0-Inf)               |
| CYST, INTRAVERTEBRAL                             | 0                                       | 0          | 1                                          | 2.4857        | 0(0-Inf)               |
| CYST, IRIS                                       | 0                                       | 0          | 4                                          | 1.1822        | 0(0-Inf)               |
| CYST, JAW                                        | 0                                       | 0          | 2                                          | 0.6309        | 0(0-Inf)               |
| CYST, JOINT (MUCOUS), SEE ALSO MYXOID            | 0                                       | 0          | 4                                          | 0.9362        | 0(0-Inf)               |
| CYST, KIDNEY, MULTIPLE (CONGENITAL)              | 0                                       | 0          | 2                                          | 1.1972        | 0(0-Inf)               |
| CYST, KIDNEY, NOS                                | 17                                      | 140.4743   | 405                                        | 150.483       | 0.9335(0.5739-1.5184)  |

| Description                                     | No. of Positive Cases with Disease Code | Case Rate* | No. of Positive Controls with Disease Code | Control Rate* | Relative Risk (95%CI)    |
|-------------------------------------------------|-----------------------------------------|------------|--------------------------------------------|---------------|--------------------------|
| CYST, KNEE, MENISCUS                            | 0                                       | 0          | 30                                         | 7.4022        | 0(0-Inf)                 |
| CYST, LABIA, (VULVA), NOS                       | 2                                       | 28.3948    | 64                                         | 28.1851       | 1.0074(0.2455-4.1337)    |
| CYST, LABIA, EPIDERMOID                         | 1                                       | 6.921      | 9                                          | 2.2306        | 3.1028(0.3857-24.9601)   |
| CYST, LABIA, SEBACEOUS                          | 0                                       | 0          | 59                                         | 25.888        | 0(0-Inf)                 |
| CYST, LACRIMAL APPARATUS                        | 0                                       | 0          | 1                                          | 0.398         | 0(0-Inf)                 |
| CYST, LACRIMAL GLAND NEC                        | 0                                       | 0          | 3                                          | 0.6548        | 0(0-Inf)                 |
| CYST, LARYNX                                    | 0                                       | 0          | 17                                         | 4.9802        | 0(0-Inf)                 |
| CYST, LIP                                       | 0                                       | 0          | 108                                        | 25.7576       | 0(0-Inf)                 |
| CYST, LIVER                                     | 3                                       | 23.2666    | 72                                         | 23.903        | 0.9734(0.3056-3.1002)    |
| CYST, LUNG, GIANT BULLOUS                       | 0                                       | 0          | 1                                          | 0.2729        | 0(0-Inf)                 |
| CYST, LUNG, NOS                                 | 0                                       | 0          | 4                                          | 0.8839        | 0(0-Inf)                 |
| CYST, LYMPHATIC, SEE ALSO LYMPHANGIOMA          | 0                                       | 0          | 1                                          | 0.2354        | 0(0-Inf)                 |
| CYST, MACULAR                                   | 1                                       | 8.4819     | 22                                         | 8.5441        | 0.9927(0.133-7.412)      |
| CYST, MANDIBLE                                  | 0                                       | 0          | 21                                         | 5.0642        | 0(0-Inf)                 |
| CYST, MAXILLA                                   | 2                                       | 14.6723    | 12                                         | 2.8817        | 5.0916(1.1216-23.1134)   |
| CYST, MEDIASTINUM                               | 0                                       | 0          | 5                                          | 3.8689        | 0(0-Inf)                 |
| CYST, MEIBOMIAN                                 | 0                                       | 0          | 6                                          | 1.444         | 0(0-Inf)                 |
| CYST, MESENTERY                                 | 0                                       | 0          | 7                                          | 2.8372        | 0(0-Inf)                 |
| CYST, MESOTHELIAL LINED                         | 0                                       | 0          | 4                                          | 1.3221        | 0(0-Inf)                 |
| CYST, MOUTH                                     | 1                                       | 7.7449     | 12                                         | 2.9368        | 2.6372(0.3389-20.5236)   |
| CYST, MUCOUS / MUCINOUS, CODE ALSO CYST BY SITE | 6                                       | 43.5825    | 161                                        | 46.5697       | 0.9359(0.4133-2.1191)    |
| CYST, MUCOUS RETENTION                          | 0                                       | 0          | 10                                         | 2.7594        | 0(0-Inf)                 |
| CYST, MUCOUS RETENTION (SALIVARY#)              | 0                                       | 0          | 24                                         | 6.5029        | 0(0-Inf)                 |
| CYST, MULTILOCLAR (OVARY)                       | 0                                       | 0          | 1                                          | 0.2354        | 0(0-Inf)                 |
| CYST, MULTILOCLAR, CODE ALSO CYST BY SITE       | 0                                       | 0          | 1                                          | 0.4048        | 0(0-Inf)                 |
| CYST, MYXOID, LOWER EXTREMITY                   | 0                                       | 0          | 17                                         | 3.9992        | 0(0-Inf)                 |
| CYST, MYXOID, NOS                               | 0                                       | 0          | 18                                         | 5.0027        | 0(0-Inf)                 |
| CYST, MYXOID, UPPER EXTREMITY                   | 7                                       | 48.9654    | 142                                        | 35.3805       | 1.384(0.6459-2.9653)     |
| CYST, NABOTHIAN, CERVIX                         | 2                                       | 44.8457    | 85                                         | 43.2044       | 1.038(0.2547-4.2293)     |
| CYST, NABOTHIAN, VAGINAL WALL                   | 0                                       | 0          | 2                                          | 0.4709        | 0(0-Inf)                 |
| CYST, NASOALVEOLAR                              | 1                                       | 11.3694    | 0                                          | 0             | 7474307135.7633(0-Inf)   |
| CYST, NASOLABIAL                                | 0                                       | 0          | 7                                          | 1.5705        | 0(0-Inf)                 |
| CYST, NASOPALATINE                              | 1                                       | 7.5752     | 10                                         | 2.5836        | 2.932(0.371-23.1708)     |
| CYST, NASOPHARYNX                               | 1                                       | 8.0429     | 3                                          | 0.7346        | 10.9494(1.0986-109.1327) |
| CYST, NECK, CODE ALSO CYST BY TYPE              | 13                                      | 91.209     | 387                                        | 101.1129      | 0.9021(0.5183-1.5698)    |
| CYST, NECK, INTERNAL                            | 0                                       | 0          | 3                                          | 0.7885        | 0(0-Inf)                 |
| CYST, NIPPLE                                    | 1                                       | 7.4131     | 16                                         | 3.7336        | 1.9855(0.2606-15.1272)   |
| CYST, NOSE (INTERNAL)                           | 1                                       | 7.7931     | 9                                          | 2.2377        | 3.4827(0.4347-27.9045)   |
| CYST, OMENTUM, NOS                              | 0                                       | 0          | 2                                          | 0.7964        | 0(0-Inf)                 |
| CYST, ORAL                                      | 1                                       | 6.951      | 4                                          | 0.9784        | 7.1048(0.7695-65.5943)   |

| Description                             | No. of Positive Cases with Disease Code | Case Rate* | No. of Positive Controls with Disease Code | Control Rate* | Relative Risk (95%CI)   |
|-----------------------------------------|-----------------------------------------|------------|--------------------------------------------|---------------|-------------------------|
| CYST, ORBIT                             | 0                                       | 0          | 7                                          | 2.0572        | 0(0-Inf)                |
| CYST, OVARIAN (SIMPLE)(BENIGN), NOS     | 7                                       | 58.4013    | 336                                        | 75.3817       | 0.7747(0.366-1.64)      |
| CYST, OVARIAN, FOLLICULAR               | 2                                       | 71.1581    | 55                                         | 36.9103       | 1.9279(0.469-7.9239)    |
| CYST, OVARIAN, FOLLICULAR, RUPTURED     | 0                                       | 0          | 1                                          | 0.8275        | 0(0-Inf)                |
| CYST, OVARIAN, HEMORRHAGIC              | 0                                       | 0          | 18                                         | 11.9801       | 0(0-Inf)                |
| CYST, OVARIAN, PAROVARIAN               | 0                                       | 0          | 3                                          | 0.6549        | 0(0-Inf)                |
| CYST, OVARIAN, RETENTION                | 0                                       | 0          | 1                                          | 0.398         | 0(0-Inf)                |
| CYST, OVARIAN, RUPTURED                 | 0                                       | 0          | 6                                          | 2.1397        | 0(0-Inf)                |
| CYST, OVARIAN, TARRY                    | 0                                       | 0          | 1                                          | 0.8275        | 0(0-Inf)                |
| CYST, PALATE                            | 0                                       | 0          | 12                                         | 2.8413        | 0(0-Inf)                |
| CYST, PANCREATIC                        | 2                                       | 18.5472    | 44                                         | 19.7278       | 0.9402(0.227-3.8936)    |
| CYST, PARATHYROID                       | 1                                       | 7.7821     | 0                                          | 0             | 17356165227.6536(0-Inf) |
| CYST, PAROTID                           | 0                                       | 0          | 8                                          | 2.3589        | 0(0-Inf)                |
| CYST, PARS PLANA, PRIMARY               | 0                                       | 0          | 1                                          | 0.8878        | 0(0-Inf)                |
| CYST, PELVIS (FEMALE#)                  | 2                                       | 13.8611    | 33                                         | 8.1034        | 1.7105(0.4074-7.1821)   |
| CYST, PENIS                             | 0                                       | 0          | 16                                         | 8.6426        | 0(0-Inf)                |
| CYST, PERIAPICAL                        | 0                                       | 0          | 13                                         | 3.3283        | 0(0-Inf)                |
| CYST, PERICARDIAL                       | 0                                       | 0          | 3                                          | 0.9609        | 0(0-Inf)                |
| CYST, PERIODONTAL                       | 0                                       | 0          | 5                                          | 1.2298        | 0(0-Inf)                |
| CYST, PERITONEUM, NOS                   | 4                                       | 28.2756    | 14                                         | 3.2144        | 8.7967(2.841-27.2374)   |
| CYST, PHARYNX                           | 0                                       | 0          | 4                                          | 1.3524        | 0(0-Inf)                |
| CYST, PILAR                             | 4                                       | 29.1844    | 167                                        | 39.5357       | 0.7382(0.2733-1.9939)   |
| CYST, PILONIDAL                         | 0                                       | 0          | 25                                         | 6.3931        | 0(0-Inf)                |
| CYST, PITUITARY                         | 0                                       | 0          | 3                                          | 0.9609        | 0(0-Inf)                |
| CYST, PLEURA                            | 0                                       | 0          | 2                                          | 0.5908        | 0(0-Inf)                |
| CYST, POPLITEAL                         | 8                                       | 56.7523    | 207                                        | 55.7097       | 1.0187(0.5017-2.0687)   |
| CYST, PROSTATE                          | 0                                       | 0          | 3                                          | 3.7624        | 0(0-Inf)                |
| CYST, RADICULAR                         | 0                                       | 0          | 3                                          | 0.7461        | 0(0-Inf)                |
| CYST, RATHKE'S POUCH                    | 0                                       | 0          | 2                                          | 0.4708        | 0(0-Inf)                |
| CYST, RECTUM                            | 0                                       | 0          | 7                                          | 2.2853        | 0(0-Inf)                |
| CYST, RETINA                            | 0                                       | 0          | 4                                          | 1.6248        | 0(0-Inf)                |
| CYST, RETINACULAR, SEE ALSO SYNOVIAL    | 0                                       | 0          | 1                                          | 0.2729        | 0(0-Inf)                |
| CYST, RETROPERITONEAL                   | 1                                       | 6.914      | 2                                          | 0.4937        | 14.005(1.2022-163.1451) |
| CYST, SALIVARY GLAND OR DUCT            | 0                                       | 0          | 6                                          | 1.7337        | 0(0-Inf)                |
| CYST, SCROTUM                           | 2                                       | 28.2732    | 35                                         | 18.5775       | 1.5219(0.3646-6.3534)   |
| CYST, SEBACEOUS, CODE ALSO CYST BY SITE | 28                                      | 203.0233   | 1079                                       | 314.1594      | 0.6462(0.4438-0.9411)   |
| CYST, SEMINAL VESICLE                   | 0                                       | 0          | 2                                          | 0.5457        | 0(0-Inf)                |
| CYST, SINUS                             | 0                                       | 0          | 17                                         | 4.1145        | 0(0-Inf)                |
| CYST, SKENE'S GLAND                     | 0                                       | 0          | 1                                          | 0.234         | 0(0-Inf)                |
| CYST, SKIN (DERM), NOS                  | 18                                      | 136.2759   | 393                                        | 123.24        | 1.1058(0.6884-1.7763)   |



| Description                               | No. of Positive Cases with Disease Code | Case Rate* | No. of Positive Controls with Disease Code | Control Rate* | Relative Risk (95%CI)  |
|-------------------------------------------|-----------------------------------------|------------|--------------------------------------------|---------------|------------------------|
| CYST, SMALL INTESTINE                     | 0                                       | 0          | 1                                          | 2.4857        | 0(0-Inf)               |
| CYST, SPERMATIC CORD                      | 0                                       | 0          | 2                                          | 0.6774        | 0(0-Inf)               |
| CYST, SPINAL CORD                         | 1                                       | 7.7327     | 11                                         | 3.6124        | 2.1406(0.2729-16.788)  |
| CYST, SPLEEN, CONGENITAL                  | 0                                       | 0          | 1                                          | 0.398         | 0(0-Inf)               |
| CYST, SPLEEN, NOS                         | 0                                       | 0          | 1                                          | 0.4048        | 0(0-Inf)               |
| CYST, SUBCORTICAL, CODE ALSO BONE BY SITE | 0                                       | 0          | 5                                          | 1.202         | 0(0-Inf)               |
| CYST, SUBLINGUAL GLAND                    | 0                                       | 0          | 1                                          | 0.398         | 0(0-Inf)               |
| CYST, SUBMANDIBULAR                       | 0                                       | 0          | 5                                          | 1.6158        | 0(0-Inf)               |
| CYST, SYNOVIAL, LOWER EXTREMITY           | 0                                       | 0          | 41                                         | 10.4522       | 0(0-Inf)               |
| CYST, SYNOVIAL, NOS                       | 3                                       | 22.4396    | 88                                         | 27.0929       | 0.8282(0.2613-2.6255)  |
| CYST, SYNOVIAL, UPPER EXTREMITY           | 4                                       | 27.9248    | 148                                        | 35.5923       | 0.7846(0.2899-2.1233)  |
| CYST, TARLOV'S                            | 0                                       | 0          | 2                                          | 1.1614        | 0(0-Inf)               |
| CYST, TENDON, LOWER EXTREMITY             | 0                                       | 0          | 7                                          | 1.662         | 0(0-Inf)               |
| CYST, TENDON, NOS                         | 0                                       | 0          | 2                                          | 0.5069        | 0(0-Inf)               |
| CYST, TENDON, UPPER EXTREMITY             | 1                                       | 6.9591     | 25                                         | 6.371         | 1.0923(0.147-8.1175)   |
| CYST, TESTIS                              | 3                                       | 43.8821    | 18                                         | 11.4895       | 3.8193(1.116-13.0708)  |
| CYST, THYMUS                              | 0                                       | 0          | 3                                          | 0.9165        | 0(0-Inf)               |
| CYST, THYROGLOSSAL                        | 1                                       | 9.2531     | 9                                          | 2.4247        | 3.8161(0.4765-30.5639) |
| CYST, THYROID                             | 1                                       | 7.0387     | 42                                         | 11.3101       | 0.6223(0.0853-4.539)   |
| CYST, TONGUE                              | 0                                       | 0          | 10                                         | 2.5792        | 0(0-Inf)               |
| CYST, TONSIL                              | 1                                       | 7.4949     | 30                                         | 7.0622        | 1.0613(0.1439-7.8266)  |
| CYST, TORNWALDT'S / THORNWALDT'S          | 0                                       | 0          | 1                                          | 0.2729        | 0(0-Inf)               |
| CYST, TRICHILEMMAL                        | 1                                       | 6.9701     | 77                                         | 19.8023       | 0.352(0.0488-2.5363)   |
| CYST, TRUNK, CODE ALSO CYST BY TYPE       | 30                                      | 217.3423   | 905                                        | 228.3582      | 0.9518(0.6609-1.3705)  |
| CYST, TRUNK, SOFT TISSUE                  | 0                                       | 0          | 4                                          | 1.84          | 0(0-Inf)               |
| CYST, TUBO-OVARIAN, NOS                   | 1                                       | 11.0817    | 7                                          | 1.7558        | 6.3113(0.762-52.2771)  |
| CYST, TURBINATE                           | 0                                       | 0          | 2                                          | 0.4853        | 0(0-Inf)               |
| CYST, UMBILICAL                           | 0                                       | 0          | 3                                          | 0.8457        | 0(0-Inf)               |
| CYST, URACHUS                             | 0                                       | 0          | 1                                          | 0.3526        | 0(0-Inf)               |
| CYST, URETER                              | 0                                       | 0          | 1                                          | 0.2354        | 0(0-Inf)               |
| CYST, URETHRA                             | 0                                       | 0          | 3                                          | 0.6536        | 0(0-Inf)               |
| CYST, UTERUS, NOS                         | 1                                       | 32.7546    | 12                                         | 7.6165        | 4.3005(0.5544-33.3595) |
| CYST, VAGINA, NOS                         | 2                                       | 43.6214    | 48                                         | 23.883        | 1.8265(0.4418-7.5505)  |
| CYST, VALLECULA                           | 0                                       | 0          | 2                                          | 0.81          | 0(0-Inf)               |
| CYST, VENTRICLE (BRAIN#)                  | 0                                       | 0          | 1                                          | 1.9071        | 0(0-Inf)               |
| CYST, VULVA, INCLUSION                    | 0                                       | 0          | 7                                          | 1.5381        | 0(0-Inf)               |
| CYST, VULVA, NOS                          | 0                                       | 0          | 26                                         | 11.7396       | 0(0-Inf)               |
| CYST, VULVA, SEBACEOUS GLAND              | 0                                       | 0          | 24                                         | 10.7064       | 0(0-Inf)               |
| CYST, WHITFIELD'S                         | 0                                       | 0          | 1                                          | 0.2729        | 0(0-Inf)               |

| Description                                                   | No. of Positive Cases with Disease Code | Case Rate* | No. of Positive Controls with Disease Code | Control Rate* | Relative Risk (95%CI)   |
|---------------------------------------------------------------|-----------------------------------------|------------|--------------------------------------------|---------------|-------------------------|
| CYSTADENOCARCINOMA CODE ALSO NEOPLASM MALIGNANT BY SITE       | 3                                       | 21.0723    | 25                                         | 5.655         | 3.7263(1.112-12.4874)   |
| CYSTADENOFIBROMA OVARY SEE ALSO CYSTADENOMA                   | 0                                       | 0          | 12                                         | 6.2408        | 0(0-Inf)                |
| CYSTADENOMA, LYMPHOMATOSUM                                    | 0                                       | 0          | 3                                          | 0.7886        | 0(0-Inf)                |
| CYSTADENOMA, MALIGNANT, CODE ALSO NEOPLASM, MALIGNANT BY SITE | 0                                       | 0          | 2                                          | 0.4709        | 0(0-Inf)                |
| CYSTADENOMA, NOS, CODE ALSO NEOPLASM, BENIGN BY SITE          | 1                                       | 7.4765     | 28                                         | 8.6473        | 0.8646(0.117-6.39)      |
| CYSTADENOMA, OVARY, MUCINOUS                                  | 0                                       | 0          | 11                                         | 6.0443        | 0(0-Inf)                |
| CYSTADENOMA, OVARY, NOS                                       | 3                                       | 51.0967    | 43                                         | 19.0895       | 2.6767(0.8246-8.6889)   |
| CYSTADENOMA, OVARY, PSEUDOMUCINOUS                            | 0                                       | 0          | 5                                          | 1.1117        | 0(0-Inf)                |
| CYSTADENOMA, OVARY, SEROUS                                    | 5                                       | 69.4308    | 81                                         | 39.614        | 1.7527(0.7067-4.3469)   |
| CYSTICERCOSIS                                                 | 0                                       | 0          | 1                                          | 0.3526        | 0(0-Inf)                |
| CYSTINURIA                                                    | 0                                       | 0          | 1                                          | 0.398         | 0(0-Inf)                |
| CYSTITIS, ACUTE, E. COLI                                      | 0                                       | 0          | 17                                         | 4.1005        | 0(0-Inf)                |
| CYSTITIS, ACUTE, KLEBSIELLA                                   | 0                                       | 0          | 2                                          | 0.432         | 0(0-Inf)                |
| CYSTITIS, ACUTE, NOS                                          | 9                                       | 62.9827    | 166                                        | 40.4732       | 1.5562(0.7932-3.0531)   |
| CYSTITIS, CHRONIC, NOS                                        | 10                                      | 85.862     | 116                                        | 45.2026       | 1.8995(0.9925-3.6353)   |
| CYSTITIS, FOLLICULARIS, SEE ALSO TRIGONITIS                   | 1                                       | 7.8645     | 5                                          | 1.7091        | 4.6016(0.524-40.4144)   |
| CYSTITIS, GLANDULARIS, SEE ALSO TRIGONITIS                    | 0                                       | 0          | 6                                          | 2.7682        | 0(0-Inf)                |
| CYSTITIS, HEMORRHAGIC                                         | 3                                       | 21.9       | 80                                         | 23.2309       | 0.9427(0.2967-2.9957)   |
| CYSTITIS, INTERSTITIAL, CHRONIC                               | 0                                       | 0          | 5                                          | 2.3441        | 0(0-Inf)                |
| CYSTITIS, INTERSTITIAL, NOS                                   | 2                                       | 14.1063    | 14                                         | 3.7258        | 3.7861(0.8472-16.9198)  |
| CYSTITIS, NEC, E. COLI                                        | 5                                       | 38.3183    | 163                                        | 36.2461       | 1.0572(0.433-2.5808)    |
| CYSTITIS, NEC, KLEBSIELLA                                     | 0                                       | 0          | 3                                          | 0.7175        | 0(0-Inf)                |
| CYSTITIS, NEC, MONILIAL                                       | 1                                       | 11.5137    | 2                                          | 1.2431        | 9.2624(0.8142-105.3625) |
| CYSTITIS, NEC, PROTEUS                                        | 0                                       | 0          | 10                                         | 2.4491        | 0(0-Inf)                |
| CYSTITIS, NOS                                                 | 29                                      | 208.5209   | 935                                        | 240.9359      | 0.8655(0.5974-1.2537)   |
| CYSTITIS, PSEUDOMONAS                                         | 0                                       | 0          | 2                                          | 0.5908        | 0(0-Inf)                |
| CYSTITIS, RADIATION                                           | 1                                       | 15.0872    | 24                                         | 21.0085       | 0.7181(0.0969-5.3238)   |
| CYSTITIS, RECURRENT, E. COLI                                  | 1                                       | 7.5515     | 6                                          | 1.2966        | 5.8242(0.6827-49.6873)  |
| CYSTITIS, RECURRENT, NOS                                      | 5                                       | 35.0235    | 105                                        | 26.7101       | 1.3112(0.5326-3.2282)   |
| CYSTITIS, SUBACUTE, NOS                                       | 1                                       | 8.4473     | 6                                          | 2.3251        | 3.6332(0.4286-30.7979)  |
| CYSTITIS, ULCERATIVE                                          | 0                                       | 0          | 1                                          | 0.4048        | 0(0-Inf)                |
| CYSTOCELE, GR 1                                               | 3                                       | 54.7539    | 100                                        | 45.7987       | 1.1955(0.3779-3.7817)   |
| CYSTOCELE, GR 2                                               | 6                                       | 104.3521   | 303                                        | 137.5061      | 0.7589(0.3377-1.7052)   |
| CYSTOCELE, GR 3                                               | 10                                      | 140.5997   | 291                                        | 138.7487      | 1.0133(0.5384-1.9073)   |
| CYSTOCELE, GR 4                                               | 0                                       | 0          | 78                                         | 53.364        | 0(0-Inf)                |
| CYSTOCELE, NOS                                                | 19                                      | 139.999    | 841                                        | 195.2195      | 0.7171(0.4546-1.1312)   |
| CYSTOCELE, P.O.                                               | 0                                       | 0          | 3                                          | 0.6536        | 0(0-Inf)                |
| CYSTOCELE, RECURRENT                                          | 0                                       | 0          | 5                                          | 1.2718        | 0(0-Inf)                |

| Description                                                                                      | No. of Positive Cases with Disease Code | Case Rate* | No. of Positive Controls with Disease Code | Control Rate* | Relative Risk (95%CI)  |
|--------------------------------------------------------------------------------------------------|-----------------------------------------|------------|--------------------------------------------|---------------|------------------------|
| CYSTOCELE, RECURRENT, GR 1                                                                       | 0                                       | 0          | 1                                          | 0.398         | 0(0-Inf)               |
| CYSTOCELE, RECURRENT, GR 2                                                                       | 0                                       | 0          | 2                                          | 0.5909        | 0(0-Inf)               |
| CYSTOCELE, RECURRENT, GR 3                                                                       | 0                                       | 0          | 1                                          | 0.234         | 0(0-Inf)               |
| CYSTORECTOCELE, GR 1                                                                             | 0                                       | 0          | 11                                         | 7.7726        | 0(0-Inf)               |
| CYSTORECTOCELE, GR 2                                                                             | 1                                       | 38.3153    | 13                                         | 9.1338        | 4.1949(0.545-32.2886)  |
| CYSTORECTOCELE, GR 3                                                                             | 0                                       | 0          | 2                                          | 0.5837        | 0(0-Inf)               |
| CYSTORECTOCELE, NOS                                                                              | 4                                       | 69.2912    | 66                                         | 29.5119       | 2.3479(0.8513-6.4758)  |
| CYSTORECTOCELE, RECURRENT                                                                        | 0                                       | 0          | 1                                          | 0.398         | 0(0-Inf)               |
| CYSTOSARCOMA PHYLLODES, NOS                                                                      | 0                                       | 0          | 1                                          | 0.234         | 0(0-Inf)               |
| CYSTO-URETHRITIS                                                                                 | 0                                       | 0          | 2                                          | 0.432         | 0(0-Inf)               |
| CYTOPENIA                                                                                        | 2                                       | 17.9916    | 30                                         | 12.7754       | 1.4083(0.3347-5.9256)  |
| DACRYOADENITIS, NOS                                                                              | 1                                       | 7.3354     | 4                                          | 0.9028        | 8.1255(0.8777-75.2275) |
| DACRYOCYSTITIS, ACUTE                                                                            | 0                                       | 0          | 1                                          | 0.2354        | 0(0-Inf)               |
| DACRYOCYSTITIS, CHRONIC                                                                          | 0                                       | 0          | 3                                          | 0.9609        | 0(0-Inf)               |
| DACRYOCYSTITIS, NOS                                                                              | 1                                       | 7.1063     | 50                                         | 13.5625       | 0.524(0.0721-3.8064)   |
| DACRYOLITH                                                                                       | 0                                       | 0          | 3                                          | 0.6536        | 0(0-Inf)               |
| DACRYOSTENOSIS                                                                                   | 1                                       | 8.8829     | 9                                          | 3.7519        | 2.3676(0.2961-18.9304) |
| DACTYLITIS                                                                                       | 0                                       | 0          | 2                                          | 1.0784        | 0(0-Inf)               |
| DAMAGE, BRAIN, ANOXIC                                                                            | 0                                       | 0          | 22                                         | 14.5645       | 0(0-Inf)               |
| DAMAGE, BRAIN, DUE TO BIRTH INJURY                                                               | 0                                       | 0          | 1                                          | 0.4751        | 0(0-Inf)               |
| DAMAGE, BRAIN, NOS                                                                               | 0                                       | 0          | 6                                          | 2.3688        | 0(0-Inf)               |
| DAMAGE, MYOCARDIUM                                                                               | 0                                       | 0          | 1                                          | 0.4048        | 0(0-Inf)               |
| DAMAGE, SKIN, SUN (ACTINIC)                                                                      | 33                                      | 292.749    | 1032                                       | 426.1747      | 0.6869(0.4854-0.9721)  |
| DANDRUFF                                                                                         | 0                                       | 0          | 14                                         | 5.5299        | 0(0-Inf)               |
| DASHBOARD, KNEE (POST TRAUMATIC)                                                                 | 0                                       | 0          | 1                                          | 0.234         | 0(0-Inf)               |
| DASHBOARD, PERINEUM                                                                              | 0                                       | 0          | 1                                          | 0.234         | 0(0-Inf)               |
| DEAFNESS, COMPLETE, BOTH EARS                                                                    | 0                                       | 0          | 1                                          | 0.8541        | 0(0-Inf)               |
| DEAFNESS, COMPLETE, ONE EAR ONLY                                                                 | 0                                       | 0          | 10                                         | 2.6531        | 0(0-Inf)               |
| DEAFNESS, COMPLETE, ONE EAR, PARTIAL DEAFNESS OF OTHER                                           | 0                                       | 0          | 1                                          | 0.889         | 0(0-Inf)               |
| DEAFNESS, CONDUCTIVE                                                                             | 0                                       | 0          | 5                                          | 1.4184        | 0(0-Inf)               |
| DEAFNESS, CONGENITAL                                                                             | 0                                       | 0          | 10                                         | 2.8435        | 0(0-Inf)               |
| DEAFNESS, NERVE, SEE ALSO LOSS, HEARING, SENSORINEURAL                                           | 0                                       | 0          | 4                                          | 1.0274        | 0(0-Inf)               |
| DEAFNESS, NOS, SEE ALSO LOSS, HEARING                                                            | 15                                      | 141.0002   | 168                                        | 74.7109       | 1.8873(1.1101-3.2086)  |
| DEAFNESS, PARTIAL, BOTH EARS                                                                     | 0                                       | 0          | 4                                          | 0.8841        | 0(0-Inf)               |
| DEAFNESS, PARTIAL, ONE EAR ONLY                                                                  | 0                                       | 0          | 7                                          | 1.7411        | 0(0-Inf)               |
| DEAFNESS, SENSORINEURAL, SEE ALSO LOSS, HEARING, SENSORINEURAL                                   | 0                                       | 0          | 15                                         | 4.4638        | 0(0-Inf)               |
| DEATH, ELSEWHERE (NOTED) - THIS#TO BE USED WHEN PT.'S DEATH&AUTOPSY#ARE NOT A PART OF MAYO CHART | 21                                      | 338.0103   | 315                                        | 308.8447      | 1.0944(0.703-1.7039)   |

| Description                                                    | No. of Positive Cases with Disease Code | Case Rate* | No. of Positive Controls with Disease Code | Control Rate* | Relative Risk (95%CI)   |
|----------------------------------------------------------------|-----------------------------------------|------------|--------------------------------------------|---------------|-------------------------|
| DEATH, INTRA-UTERINE, EARLY (BEFORE 20 WEEKS)(MOM'S HISTORY)   | 0                                       | 0          | 2                                          | 1.6542        | 0(0-Inf)                |
| DEATH, INTRA-UTERINE, LATE (AFTER 20 WEEKS)(MOM'S HISTORY)     | 0                                       | 0          | 2                                          | 1.6556        | 0(0-Inf)                |
| DEATH, NO AUTOPSY - ZR                                         | 115                                     | 1803.142   | 1552                                       | 1475.5642     | 1.222(1.0107-1.4775)    |
| DEATH, SUDDEN UNEXPECTED, NON-INFANT                           | 0                                       | 0          | 17                                         | 21.3683       | 0(0-Inf)                |
| DEATH, WITH AUTOPSY REPORT - AR                                | 21                                      | 309.4279   | 478                                        | 414.3876      | 0.7467(0.482-1.1568)    |
| DEBILITY                                                       | 12                                      | 191.035    | 171                                        | 165.8235      | 1.152(0.6408-2.0713)    |
| DEBRIDEMENT OF WOUND                                           | 3                                       | 25.6157    | 92                                         | 36.1364       | 0.7089(0.2239-2.2439)   |
| DEBRIS, EAR CANAL                                              | 4                                       | 30.112     | 33                                         | 10.484        | 2.8722(1.0102-8.1663)   |
| DEBRIS, VITREOUS                                               | 1                                       | 6.9441     | 5                                          | 1.2152        | 5.7142(0.6495-50.2726)  |
| DECALCIFICATION OF BONE                                        | 2                                       | 14.4381    | 48                                         | 10.6138       | 1.3603(0.3288-5.6286)   |
| DECOMPENSATION, BLADDER                                        | 0                                       | 0          | 4                                          | 1.7194        | 0(0-Inf)                |
| DECOMPENSATION, CARDIAC, SEE ALSO FAILURE, CONGESTIVE HEART    | 1                                       | 14.65      | 32                                         | 28.7941       | 0.5088(0.0694-3.7323)   |
| DECOMPENSATION, CORNEA                                         | 0                                       | 0          | 5                                          | 3.7952        | 0(0-Inf)                |
| DECOMPENSATION, HEPATIC                                        | 0                                       | 0          | 1                                          | 0.2729        | 0(0-Inf)                |
| DECOMPENSATION, MYOCARDIAL, SEE ALSO FAILURE, CONGESTIVE HEART | 0                                       | 0          | 2                                          | 1.1973        | 0(0-Inf)                |
| DECOMPENSATION, RESPIRATORY                                    | 1                                       | 8.2719     | 4                                          | 1.4872        | 5.5622(0.6056-51.0914)  |
| DECONDITIONED, CARDIOVASCULAR                                  | 0                                       | 0          | 15                                         | 3.5699        | 0(0-Inf)                |
| DECONDITIONED, STATE, NOS                                      | 61                                      | 606.5251   | 1239                                       | 609.018       | 0.9959(0.7696-1.2888)   |
| DECREASED, ACTIVITIES OF DAILY LIVING (ADL)                    | 7                                       | 124.0444   | 136                                        | 157.4987      | 0.7876(0.368-1.6854)    |
| DECREASED, ACTIVITY (FUNCTIONAL)                               | 6                                       | 97.1037    | 107                                        | 106.3776      | 0.9128(0.4005-2.0805)   |
| DECREASED, ACUITY (HEARING) SEE ALSO IMPAIRED                  | 0                                       | 0          | 65                                         | 29.6557       | 0(0-Inf)                |
| DECREASED, ALERTNESS                                           | 3                                       | 55.0575    | 3                                          | 3.3646        | 16.3636(3.2602-82.1321) |
| DECREASED, CARDIAC RESERVE                                     | 0                                       | 0          | 2                                          | 1.0782        | 0(0-Inf)                |
| DECREASED, ENERGY                                              | 4                                       | 44.0463    | 68                                         | 39.2589       | 1.1219(0.4081-3.0848)   |
| DECREASED, FLUID INTAKE                                        | 2                                       | 30.5583    | 55                                         | 51.8372       | 0.5895(0.1435-2.4212)   |
| DECREASED, HEARING, SEE ALSO LOSS                              | 19                                      | 180.2254   | 557                                        | 257.2842      | 0.7005(0.443-1.1077)    |
| DECREASED, MOBILITY (MALAISE / FATIGUE #)                      | 3                                       | 38.2985    | 37                                         | 26.5864       | 1.4405(0.4424-4.6908)   |
| DECREASED, PERFUSION                                           | 0                                       | 0          | 2                                          | 1.1613        | 0(0-Inf)                |
| DECREASED, PROPRIOCEPTION                                      | 0                                       | 0          | 6                                          | 3.6261        | 0(0-Inf)                |
| DECREASED, PULSATION                                           | 1                                       | 7.2139     | 7                                          | 1.9823        | 3.6391(0.4383-30.2156)  |
| DECREASED, RECALL, DELAYED                                     | 0                                       | 0          | 1                                          | 0.234         | 0(0-Inf)                |
| DECREASED, RENAL FUNCTION                                      | 0                                       | 0          | 31                                         | 13.4628       | 0(0-Inf)                |
| DECREASED, VISUAL ACUITY                                       | 12                                      | 113.656    | 286                                        | 131.6226      | 0.8635(0.4839-1.5407)   |
| DECREASED, VISUAL MEMORY                                       | 0                                       | 0          | 1                                          | 0.8878        | 0(0-Inf)                |
| DECUBITUS (ULCER#)                                             | 3                                       | 39.4996    | 39                                         | 28.9737       | 1.3633(0.4198-4.4278)   |
| DEEP BITE                                                      | 0                                       | 0          | 1                                          | 0.3526        | 0(0-Inf)                |

| Description                                     | No. of Positive Cases with Disease Code | Case Rate* | No. of Positive Controls with Disease Code | Control Rate* | Relative Risk (95%CI) |
|-------------------------------------------------|-----------------------------------------|------------|--------------------------------------------|---------------|-----------------------|
| DEFECT, ATRIAL SEPTAL, ACQUIRED                 | 0                                       | 0          | 4                                          | 1.3225        | 0(0-Inf)              |
| DEFECT, ATRIAL SEPTAL, RESIDUAL                 | 0                                       | 0          | 1                                          | 0.2354        | 0(0-Inf)              |
| DEFECT, ATRIAL SEPTAL, SECUNDUM TYPE            | 0                                       | 0          | 6                                          | 1.4658        | 0(0-Inf)              |
| DEFECT, ATRIAL SEPTAL, SINUS VENOUS TYPE        | 0                                       | 0          | 1                                          | 0.2729        | 0(0-Inf)              |
| DEFECT, ATRIAL-SEPTAL, CONGENITAL--ASD          | 0                                       | 0          | 22                                         | 6.2554        | 0(0-Inf)              |
| DEFECT, ATTIC                                   | 0                                       | 0          | 3                                          | 0.8019        | 0(0-Inf)              |
| DEFECT, CARDIAC, CONGENITAL                     | 0                                       | 0          | 1                                          | 0.234         | 0(0-Inf)              |
| DEFECT, CHONDRAL                                | 0                                       | 0          | 19                                         | 4.6783        | 0(0-Inf)              |
| DEFECT, CIRCULATION, LOWER EXTREMITY            | 0                                       | 0          | 7                                          | 7.552         | 0(0-Inf)              |
| DEFECT, CIRCULATION, NOS                        | 0                                       | 0          | 8                                          | 3.0882        | 0(0-Inf)              |
| DEFECT, COAGULATION                             | 0                                       | 0          | 8                                          | 2.358         | 0(0-Inf)              |
| DEFECT, COMMUNICATION                           | 0                                       | 0          | 22                                         | 9.3289        | 0(0-Inf)              |
| DEFECT, CONDUCTION SYSTEM, AV                   | 0                                       | 0          | 6                                          | 4.4954        | 0(0-Inf)              |
| DEFECT, CONDUCTION SYSTEM, SEE ALSO HEART BLOCK | 0                                       | 0          | 68                                         | 51.3054       | 0(0-Inf)              |
| DEFECT, CONDUCTION, INTRAVENTRICULAR            | 0                                       | 0          | 11                                         | 4.2376        | 0(0-Inf)              |
| DEFECT, EAR, CONGENITAL                         | 0                                       | 0          | 1                                          | 0.2354        | 0(0-Inf)              |
| DEFECT, EPITHELIAL (EYE)                        | 2                                       | 14.6916    | 51                                         | 15.4          | 0.954(0.2313-3.9341)  |
| DEFECT, FILLING, SEE ALSO ABNORMAL X-RAY        | 0                                       | 0          | 1                                          | 0.4048        | 0(0-Inf)              |
| DEFECT, GLAUCOMATOUS                            | 0                                       | 0          | 3                                          | 1.2105        | 0(0-Inf)              |
| DEFECT, HOMONYMOUS FIELD                        | 0                                       | 0          | 13                                         | 5.2589        | 0(0-Inf)              |
| DEFECT, NERVE, POST OPERATIVE                   | 0                                       | 0          | 4                                          | 1.3222        | 0(0-Inf)              |
| DEFECT, NEURAL ARCH, CONGENITAL                 | 0                                       | 0          | 3                                          | 1.6178        | 0(0-Inf)              |
| DEFECT, OSTEOCHONDRAL                           | 0                                       | 0          | 15                                         | 3.6452        | 0(0-Inf)              |
| DEFECT, PERICARDIUM                             | 0                                       | 0          | 1                                          | 0.3526        | 0(0-Inf)              |
| DEFECT, PLATELET                                | 0                                       | 0          | 5                                          | 1.2297        | 0(0-Inf)              |
| DEFECT, RETINA, MULTIPLE                        | 0                                       | 0          | 1                                          | 0.2729        | 0(0-Inf)              |
| DEFECT, RETINAL NOS                             | 1                                       | 7.0448     | 5                                          | 1.3674        | 5.152(0.5874-45.1834) |
| DEFECT, SEPTAL, OTHER COMBINED                  | 0                                       | 0          | 2                                          | 0.5709        | 0(0-Inf)              |
| DEFECT, SKULL, ACQUIRED                         | 0                                       | 0          | 3                                          | 0.9773        | 0(0-Inf)              |
| DEFECT, VENTILATORY, NOS                        | 0                                       | 0          | 2                                          | 0.4853        | 0(0-Inf)              |
| DEFECT, VENTRICULAR SEPTAL, ACQUIRED            | 0                                       | 0          | 3                                          | 1.5109        | 0(0-Inf)              |
| DEFECT, VENTRICULAR SEPTAL, CONGENITAL-VSD      | 0                                       | 0          | 10                                         | 2.4733        | 0(0-Inf)              |
| DEFECT, VENTRICULAR SEPTAL, RESIDUAL            | 0                                       | 0          | 1                                          | 0.2729        | 0(0-Inf)              |
| DEFECT, VENTRICULAR SEPTAL, SMALL               | 0                                       | 0          | 3                                          | 0.746         | 0(0-Inf)              |
| DEFECT, VISION                                  | 6                                       | 49.8817    | 102                                        | 38.2353       | 1.3046(0.5709-2.9814) |
| DEFECT, VISION, CONGENITAL                      | 0                                       | 0          | 3                                          | 0.741         | 0(0-Inf)              |
| DEFECT, VISUAL FIELD NEC                        | 1                                       | 9.5192     | 23                                         | 10.7102       | 0.8888(0.1195-6.6126) |
| DEFECT, VISUAL FIELD, NOS                       | 7                                       | 57.9791    | 121                                        | 44.9589       | 1.2896(0.6003-2.7704) |
| DEFECTIVE SWEATING (PATTERN)                    | 0                                       | 0          | 2                                          | 0.432         | 0(0-Inf)              |
| DEFICIENCY, 21-HYDROXYLASE                      | 0                                       | 0          | 1                                          | 0.234         | 0(0-Inf)              |

| Description                                             | No. of Positive Cases with Disease Code | Case Rate* | No. of Positive Controls with Disease Code | Control Rate* | Relative Risk (95%CI)    |
|---------------------------------------------------------|-----------------------------------------|------------|--------------------------------------------|---------------|--------------------------|
| DEFICIENCY, ALPHA 1 ANTITRYPSIN                         | 0                                       | 0          | 11                                         | 2.8123        | 0(0-Inf)                 |
| DEFICIENCY, ANTERIOR/POSTERIOR CRUCIATE LIGAMENT (KNEE) | 2                                       | 13.8916    | 28                                         | 7.0194        | 1.979(0.468-8.3688)      |
| DEFICIENCY, ANTITHROMBIN III                            | 0                                       | 0          | 1                                          | 0.8878        | 0(0-Inf)                 |
| DEFICIENCY, BILE SALT                                   | 0                                       | 0          | 2                                          | 0.8723        | 0(0-Inf)                 |
| DEFICIENCY, CALCIUM, DIETARY                            | 1                                       | 6.9553     | 57                                         | 13.2288       | 0.5258(0.0726-3.8099)    |
| DEFICIENCY, C'ESTERASE INHIBITOR                        | 0                                       | 0          | 1                                          | 0.234         | 0(0-Inf)                 |
| DEFICIENCY, CITRATE                                     | 0                                       | 0          | 1                                          | 0.2729        | 0(0-Inf)                 |
| DEFICIENCY, COLOR VISION, NEC                           | 0                                       | 0          | 2                                          | 0.9503        | 0(0-Inf)                 |
| DEFICIENCY, COMPLEMENT (C1-C9)                          | 0                                       | 0          | 1                                          | 0.234         | 0(0-Inf)                 |
| DEFICIENCY, DIET                                        | 0                                       | 0          | 4                                          | 4.7803        | 0(0-Inf)                 |
| DEFICIENCY, ESTROGEN                                    | 0                                       | 0          | 87                                         | 38.1261       | 0(0-Inf)                 |
| DEFICIENCY, FACTOR IX                                   | 0                                       | 0          | 1                                          | 0.234         | 0(0-Inf)                 |
| DEFICIENCY, FACTOR V                                    | 2                                       | 15.6974    | 29                                         | 9.9906        | 1.5712(0.3727-6.6238)    |
| DEFICIENCY, FACTOR VII                                  | 0                                       | 0          | 1                                          | 1.0359        | 0(0-Inf)                 |
| DEFICIENCY, FACTOR XII                                  | 0                                       | 0          | 3                                          | 0.7884        | 0(0-Inf)                 |
| DEFICIENCY, FOLATE                                      | 0                                       | 0          | 16                                         | 4.6107        | 0(0-Inf)                 |
| DEFICIENCY, FOLIC ACID                                  | 1                                       | 6.9223     | 9                                          | 2.313         | 2.9928(0.374-23.9487)    |
| DEFICIENCY, FRUCTOSE 1,6 DIPHOSPHATASE                  | 0                                       | 0          | 1                                          | 0.234         | 0(0-Inf)                 |
| DEFICIENCY, GONADOTROPIN                                | 0                                       | 0          | 1                                          | 0.3526        | 0(0-Inf)                 |
| DEFICIENCY, GROWTH HORMONE, NOS                         | 0                                       | 0          | 1                                          | 0.8877        | 0(0-Inf)                 |
| DEFICIENCY, IMMUNE                                      | 0                                       | 0          | 6                                          | 3.5085        | 0(0-Inf)                 |
| DEFICIENCY, IMMUNOGLOBULIN A (IGA)                      | 0                                       | 0          | 3                                          | 1.3866        | 0(0-Inf)                 |
| DEFICIENCY, IMMUNOGLOBULIN, NOS                         | 0                                       | 0          | 9                                          | 2.2143        | 0(0-Inf)                 |
| DEFICIENCY, IRON WITHOUT ANEMIA                         | 5                                       | 40.015     | 303                                        | 106.3006      | 0.3764(0.1554-0.9119)    |
| DEFICIENCY, JAW, VERTICAL/HORIZONTAL                    | 0                                       | 0          | 5                                          | 1.2295        | 0(0-Inf)                 |
| DEFICIENCY, LACTASE                                     | 0                                       | 0          | 9                                          | 2.1723        | 0(0-Inf)                 |
| DEFICIENCY, MAGNESIUM                                   | 1                                       | 9.5582     | 1                                          | 0.4929        | 19.3911(1.1512-326.6208) |
| DEFICIENCY, PROTEIN C (HETEROZYGOUS)                    | 0                                       | 0          | 7                                          | 1.8367        | 0(0-Inf)                 |
| DEFICIENCY, PROTEIN S                                   | 0                                       | 0          | 5                                          | 1.2296        | 0(0-Inf)                 |
| DEFICIENCY, PSEUDOCHOLINESTERASE                        | 0                                       | 0          | 2                                          | 0.5475        | 0(0-Inf)                 |
| DEFICIENCY, PYRIDOXINE                                  | 0                                       | 0          | 1                                          | 0.398         | 0(0-Inf)                 |
| DEFICIENCY, SACCADIC EYE MOVEMENTS                      | 0                                       | 0          | 1                                          | 0.2354        | 0(0-Inf)                 |
| DEFICIENCY, SECRETION OF URINE                          | 0                                       | 0          | 2                                          | 3.0812        | 0(0-Inf)                 |
| DEFICIENCY, THYROID STIMULATING HORMONE (TSH)           | 0                                       | 0          | 4                                          | 1.0352        | 0(0-Inf)                 |
| DEFICIENCY, VITAMIN A, NOS                              | 1                                       | 8.8468     | 2                                          | 0.4498        | 19.6678(1.6976-227.8655) |
| DEFICIENCY, VITAMIN B 12                                | 17                                      | 191.8433   | 242                                        | 143.8456      | 1.3337(0.8142-2.1847)    |
| DEFICIENCY, VITAMIN B 6                                 | 0                                       | 0          | 1                                          | 0.8528        | 0(0-Inf)                 |
| DEFICIENCY, VITAMIN D                                   | 1                                       | 9.6941     | 55                                         | 26.5244       | 0.3655(0.0505-2.6471)    |
| DEFICIENCY, VITAMIN E                                   | 0                                       | 0          | 1                                          | 0.4048        | 0(0-Inf)                 |
| DEFICIENCY, VITAMIN K                                   | 0                                       | 0          | 3                                          | 1.2148        | 0(0-Inf)                 |

| Description                                     | No. of Positive Cases with Disease Code | Case Rate* | No. of Positive Controls with Disease Code | Control Rate* | Relative Risk (95%CI)  |
|-------------------------------------------------|-----------------------------------------|------------|--------------------------------------------|---------------|------------------------|
| DEFICIENCY, VITAMIN, NOS, SEE ALSO AVITAMINOSIS | 1                                       | 9.8555     | 4                                          | 0.9973        | 9.8822(1.0705-91.2313) |
| DEFICIENCY, ZINC                                | 0                                       | 0          | 3                                          | 0.7175        | 0(0-Inf)               |
| DEFICIENT, CHIN                                 | 0                                       | 0          | 5                                          | 1.4721        | 0(0-Inf)               |
| DEFICIT, AUDITORY, CONDUCTIVE                   | 0                                       | 0          | 3                                          | 0.9283        | 0(0-Inf)               |
| DEFICIT, EXTRAPYRAMIDAL                         | 0                                       | 0          | 6                                          | 6.5304        | 0(0-Inf)               |
| DEFICIT, HEARING                                | 0                                       | 0          | 47                                         | 33.9524       | 0(0-Inf)               |
| DEFICIT, MEMORY                                 | 4                                       | 43.5673    | 34                                         | 19.2259       | 2.2661(0.7997-6.4215)  |
| DEFICIT, NERVE ROOT                             | 0                                       | 0          | 1                                          | 0.3526        | 0(0-Inf)               |
| DEFICIT, NEUROLOGIC                             | 8                                       | 60.4882    | 141                                        | 44.7468       | 1.3518(0.6612-2.7637)  |
| DEFICIT, PLATELET                               | 0                                       | 0          | 1                                          | 1.9068        | 0(0-Inf)               |
| DEFICIT, SENSORY                                | 1                                       | 9.118      | 48                                         | 20.841        | 0.4375(0.0602-3.1777)  |
| DEFLECTION, NASAL SEPTUM                        | 4                                       | 29.0236    | 108                                        | 27.2859       | 1.0637(0.3911-2.8931)  |
| DEFORMITY, ABDOMINAL WALL, ACQUIRED             | 0                                       | 0          | 10                                         | 3.509         | 0(0-Inf)               |
| DEFORMITY, ANKLE                                | 1                                       | 8.5725     | 15                                         | 5.8914        | 1.4551(0.1906-11.1096) |
| DEFORMITY, ANKLE, CONTRACTION                   | 0                                       | 0          | 1                                          | 0.2354        | 0(0-Inf)               |
| DEFORMITY, ANTRAL (STOMACH)                     | 3                                       | 25.5439    | 92                                         | 35.8521       | 0.7125(0.2251-2.2555)  |
| DEFORMITY, ANUS, ACQUIRED                       | 0                                       | 0          | 3                                          | 1.3868        | 0(0-Inf)               |
| DEFORMITY, AORTA, ACQUIRED                      | 0                                       | 0          | 1                                          | 0.8878        | 0(0-Inf)               |
| DEFORMITY, AORTIC VALVE, ACQUIRED               | 0                                       | 0          | 1                                          | 0.3526        | 0(0-Inf)               |
| DEFORMITY, ARM, NOS                             | 0                                       | 0          | 2                                          | 0.7898        | 0(0-Inf)               |
| DEFORMITY, ARTERY, ACQUIRED, NEC                | 0                                       | 0          | 1                                          | 0.4048        | 0(0-Inf)               |
| DEFORMITY, BILE DUCT, ACQUIRED                  | 0                                       | 0          | 2                                          | 1.1972        | 0(0-Inf)               |
| DEFORMITY, BONE, CONGENITAL                     | 0                                       | 0          | 2                                          | 0.5069        | 0(0-Inf)               |
| DEFORMITY, BRAIN, ACQUIRED                      | 0                                       | 0          | 1                                          | 0.2354        | 0(0-Inf)               |
| DEFORMITY, BREAST, NOS                          | 0                                       | 0          | 20                                         | 8.724         | 0(0-Inf)               |
| DEFORMITY, CANTHUS                              | 0                                       | 0          | 3                                          | 0.9608        | 0(0-Inf)               |
| DEFORMITY, CERVIX, ACQUIRED                     | 0                                       | 0          | 2                                          | 0.432         | 0(0-Inf)               |
| DEFORMITY, CHEST, ACQUIRED                      | 0                                       | 0          | 8                                          | 1.763         | 0(0-Inf)               |
| DEFORMITY, CORNEA NOS                           | 0                                       | 0          | 6                                          | 1.7129        | 0(0-Inf)               |
| DEFORMITY, CRANIUM, CONGENITAL                  | 0                                       | 0          | 1                                          | 0.2729        | 0(0-Inf)               |
| DEFORMITY, DIAPHRAGM, ACQUIRED                  | 0                                       | 0          | 1                                          | 0.2354        | 0(0-Inf)               |
| DEFORMITY, DUODENAL                             | 2                                       | 18.0273    | 74                                         | 31.7755       | 0.5673(0.139-2.3164)   |
| DEFORMITY, DUODENAL ULCER (HISTORY OF)          | 0                                       | 0          | 9                                          | 6.1492        | 0(0-Inf)               |
| DEFORMITY, EAR LOBE, ACQUIRED                   | 0                                       | 0          | 15                                         | 6.5391        | 0(0-Inf)               |
| DEFORMITY, EAR, ACQUIRED                        | 0                                       | 0          | 8                                          | 2.4862        | 0(0-Inf)               |
| DEFORMITY, EAR, LATE EFFECT OF TRAUMA           | 0                                       | 0          | 1                                          | 0.2354        | 0(0-Inf)               |
| DEFORMITY, ELBOW, FLEXION, NOS                  | 0                                       | 0          | 1                                          | 0.3526        | 0(0-Inf)               |
| DEFORMITY, ELBOW, NOS                           | 0                                       | 0          | 7                                          | 2.4592        | 0(0-Inf)               |
| DEFORMITY, EQUINOVALGUS, FOOT                   | 0                                       | 0          | 1                                          | 0.8528        | 0(0-Inf)               |
| DEFORMITY, EQUINOVARUS, FOOT                    | 0                                       | 0          | 2                                          | 0.4709        | 0(0-Inf)               |

| Description                            | No. of Positive Cases with Disease Code | Case Rate* | No. of Positive Controls with Disease Code | Control Rate* | Relative Risk (95%CI)   |
|----------------------------------------|-----------------------------------------|------------|--------------------------------------------|---------------|-------------------------|
| DEFORMITY, EQUINUS, FOOT               | 0                                       | 0          | 2                                          | 0.5908        | 0(0-Inf)                |
| DEFORMITY, ESOPHAGUS, ACQUIRED         | 11                                      | 99.1399    | 197                                        | 83.7412       | 1.1839(0.6438-2.1771)   |
| DEFORMITY, ESOPHAGUS, CONGENITAL, NOS  | 0                                       | 0          | 1                                          | 0.2355        | 0(0-Inf)                |
| DEFORMITY, EXTREMITY, LOWER, NOS       | 1                                       | 7.1778     | 5                                          | 1.4002        | 5.1261(0.5816-45.1776)  |
| DEFORMITY, EXTREMITY, NOS              | 0                                       | 0          | 2                                          | 3.0816        | 0(0-Inf)                |
| DEFORMITY, EXTREMITY, UPPER, NOS       | 0                                       | 0          | 4                                          | 0.967         | 0(0-Inf)                |
| DEFORMITY, EYE (MUSCLE), ACQUIRED      | 0                                       | 0          | 3                                          | 1.5765        | 0(0-Inf)                |
| DEFORMITY, EYE, ACQUIRED               | 0                                       | 0          | 6                                          | 2.371         | 0(0-Inf)                |
| DEFORMITY, EYELID, ACQUIRED            | 0                                       | 0          | 19                                         | 4.2573        | 0(0-Inf)                |
| DEFORMITY, EYELID, NOS                 | 0                                       | 0          | 1                                          | 0.8528        | 0(0-Inf)                |
| DEFORMITY, FACE, CONGENITAL            | 0                                       | 0          | 1                                          | 0.2729        | 0(0-Inf)                |
| DEFORMITY, FACE, NOS                   | 0                                       | 0          | 5                                          | 2.7675        | 0(0-Inf)                |
| DEFORMITY, FEMUR, NOS                  | 0                                       | 0          | 6                                          | 1.9221        | 0(0-Inf)                |
| DEFORMITY, FIBULA, CONGENITAL          | 0                                       | 0          | 1                                          | 0.398         | 0(0-Inf)                |
| DEFORMITY, FINGER, CONGENITAL          | 0                                       | 0          | 2                                          | 0.5069        | 0(0-Inf)                |
| DEFORMITY, FINGER, NOS (ACQUIRED)      | 1                                       | 7.0159     | 80                                         | 19.4691       | 0.3604(0.05-2.595)      |
| DEFORMITY, FOOT, CALCANEOVALGUS        | 0                                       | 0          | 1                                          | 0.2354        | 0(0-Inf)                |
| DEFORMITY, FOOT, CAVUS                 | 0                                       | 0          | 5                                          | 1.2694        | 0(0-Inf)                |
| DEFORMITY, FOOT, CONGENITAL            | 0                                       | 0          | 4                                          | 1.0352        | 0(0-Inf)                |
| DEFORMITY, FOOT, NOS (ACQUIRED)        | 3                                       | 21.4839    | 117                                        | 32.7333       | 0.6563(0.2081-2.0697)   |
| DEFORMITY, FOOT, VARUS, ACQUIRED       | 0                                       | 0          | 38                                         | 8.9789        | 0(0-Inf)                |
| DEFORMITY, FOREARM, ACQUIRED           | 0                                       | 0          | 2                                          | 0.7896        | 0(0-Inf)                |
| DEFORMITY, FOREARM, CONGENITAL         | 0                                       | 0          | 1                                          | 0.3527        | 0(0-Inf)                |
| DEFORMITY, GENITALIA, FEMALE, ACQUIRED | 0                                       | 0          | 16                                         | 6.9291        | 0(0-Inf)                |
| DEFORMITY, GENITALIA, MALE, ACQUIRED   | 0                                       | 0          | 3                                          | 0.871         | 0(0-Inf)                |
| DEFORMITY, GIBBOUS, SEE ALSO KYPHOSIS  | 0                                       | 0          | 1                                          | 0.3526        | 0(0-Inf)                |
| DEFORMITY, GLOBE (EYE), ACQUIRED       | 0                                       | 0          | 1                                          | 0.2729        | 0(0-Inf)                |
| DEFORMITY, HAND, CONGENITAL            | 0                                       | 0          | 3                                          | 0.7798        | 0(0-Inf)                |
| DEFORMITY, HAND, NOS (ACQUIRED)        | 1                                       | 7.9955     | 26                                         | 9.1025        | 0.8784(0.1185-6.5095)   |
| DEFORMITY, HEAD (BONY)                 | 0                                       | 0          | 2                                          | 1.898         | 0(0-Inf)                |
| DEFORMITY, HIP, CONGENITAL             | 0                                       | 0          | 2                                          | 1.1975        | 0(0-Inf)                |
| DEFORMITY, HIP, FLEXION, NOS           | 0                                       | 0          | 1                                          | 2.4878        | 0(0-Inf)                |
| DEFORMITY, HIP, NOS (ACQUIRED)         | 0                                       | 0          | 10                                         | 4.6308        | 0(0-Inf)                |
| DEFORMITY, HIP, ROTATION, NOS          | 0                                       | 0          | 2                                          | 8.3927        | 0(0-Inf)                |
| DEFORMITY, HUMERUS, NOS                | 1                                       | 30.742     | 0                                          | 0             | 14411421214.3282(0-Inf) |
| DEFORMITY, INTESTINE, ACQUIRED         | 0                                       | 0          | 16                                         | 4.5257        | 0(0-Inf)                |
| DEFORMITY, JAW                         | 1                                       | 7.0397     | 11                                         | 2.9744        | 2.3667(0.3015-18.5767)  |
| DEFORMITY, JOINT, NEC, ABDUCTION       | 0                                       | 0          | 1                                          | 0.234         | 0(0-Inf)                |
| DEFORMITY, JOINT, NEC, ADDUCTION       | 0                                       | 0          | 1                                          | 0.3526        | 0(0-Inf)                |
| DEFORMITY, JOINT, NEC, CONTRACTION     | 0                                       | 0          | 2                                          | 1.1615        | 0(0-Inf)                |



| Description                                   | No. of Positive Cases with Disease Code | Case Rate* | No. of Positive Controls with Disease Code | Control Rate* | Relative Risk (95%CI)  |
|-----------------------------------------------|-----------------------------------------|------------|--------------------------------------------|---------------|------------------------|
| DEFORMITY, JOINT, NEC, EXTENSION              | 0                                       | 0          | 8                                          | 1.8345        | 0(0-Inf)               |
| DEFORMITY, JOINT, NEC, FLEXION                | 1                                       | 7.318      | 12                                         | 3.5827        | 2.0426(0.2625-15.891)  |
| DEFORMITY, JOINT, NOS (ACQUIRED)              | 0                                       | 0          | 12                                         | 3.2228        | 0(0-Inf)               |
| DEFORMITY, KIDNEY, ACQUIRED                   | 0                                       | 0          | 4                                          | 1.142         | 0(0-Inf)               |
| DEFORMITY, KIDNEY, NOS (CONGENITAL)           | 0                                       | 0          | 3                                          | 0.9283        | 0(0-Inf)               |
| DEFORMITY, KIDNEY, VASCULAR, NOS (CONGENITAL) | 0                                       | 0          | 2                                          | 0.5069        | 0(0-Inf)               |
| DEFORMITY, KNEE, FLEXION, NOS                 | 1                                       | 8.5425     | 10                                         | 3.9216        | 2.1784(0.2753-17.2365) |
| DEFORMITY, KNEE, NOS (ACQUIRED)               | 3                                       | 23.8305    | 46                                         | 15.8726       | 1.5014(0.4645-4.8522)  |
| DEFORMITY, KNEE, RECURVATURE, NOS             | 0                                       | 0          | 1                                          | 0.8528        | 0(0-Inf)               |
| DEFORMITY, KNEE, ROTATION, NOS                | 0                                       | 0          | 1                                          | 0.4048        | 0(0-Inf)               |
| DEFORMITY, LEG, NOS (ACQUIRED)                | 1                                       | 6.953      | 14                                         | 3.4355        | 2.0239(0.2631-15.5659) |
| DEFORMITY, LENS, ACQUIRED                     | 0                                       | 0          | 2                                          | 0.4681        | 0(0-Inf)               |
| DEFORMITY, LIGAMENT, NOS (ACQUIRED)           | 0                                       | 0          | 2                                          | 0.7961        | 0(0-Inf)               |
| DEFORMITY, LIP, ACQUIRED                      | 1                                       | 8.273      | 3                                          | 1.1096        | 7.4558(0.7497-74.1478) |
| DEFORMITY, LUNG, ACQUIRED                     | 0                                       | 0          | 1                                          | 0.3526        | 0(0-Inf)               |
| DEFORMITY, MADELUNG'S (WRIST)                 | 0                                       | 0          | 1                                          | 0.4751        | 0(0-Inf)               |
| DEFORMITY, MESENTERY, ACQUIRED                | 0                                       | 0          | 1                                          | 0.234         | 0(0-Inf)               |
| DEFORMITY, MIDDLE EAR                         | 0                                       | 0          | 1                                          | 0.2354        | 0(0-Inf)               |
| DEFORMITY, MITRAL VALVE, ACQUIRED             | 0                                       | 0          | 12                                         | 2.6934        | 0(0-Inf)               |
| DEFORMITY, MITRAL VALVE, CONGENITAL           | 0                                       | 0          | 2                                          | 1.0785        | 0(0-Inf)               |
| DEFORMITY, MOUTH, ACQUIRED                    | 0                                       | 0          | 10                                         | 2.457         | 0(0-Inf)               |
| DEFORMITY, MUSCLE, NOS (ACQUIRED)             | 1                                       | 8.0466     | 5                                          | 1.8062        | 4.455(0.5103-38.8942)  |
| DEFORMITY, MUSCULOSKELETAL, ACQUIRED, NOS     | 0                                       | 0          | 4                                          | 2.1569        | 0(0-Inf)               |
| DEFORMITY, NAIL                               | 15                                      | 124.3232   | 174                                        | 63.7668       | 1.9497(1.1473-3.3131)  |
| DEFORMITY, NASAL SEPTUM, CONGENITAL           | 4                                       | 29.1881    | 127                                        | 31.8159       | 0.9174(0.3383-2.4876)  |
| DEFORMITY, NASAL SEPTUM, NOS                  | 8                                       | 56.7112    | 465                                        | 117.9564      | 0.4808(0.2388-0.968)   |
| DEFORMITY, NECK, MUSCULOSKELETAL, NOS         | 0                                       | 0          | 3                                          | 1.2145        | 0(0-Inf)               |
| DEFORMITY, NIPPLE, ACQUIRED                   | 0                                       | 0          | 5                                          | 1.2712        | 0(0-Inf)               |
| DEFORMITY, NOSE, CONGENITAL                   | 0                                       | 0          | 20                                         | 5.6075        | 0(0-Inf)               |
| DEFORMITY, NOSE, NOS                          | 1                                       | 7.5595     | 83                                         | 20.0891       | 0.3763(0.0523-2.7085)  |
| DEFORMITY, OCULAR MUSCLE, ACQUIRED            | 0                                       | 0          | 8                                          | 2.2061        | 0(0-Inf)               |
| DEFORMITY, PALATE, HARD, ACQUIRED             | 0                                       | 0          | 2                                          | 0.5475        | 0(0-Inf)               |
| DEFORMITY, PALATE, SOFT, ACQUIRED             | 0                                       | 0          | 14                                         | 3.742         | 0(0-Inf)               |
| DEFORMITY, PANCREAS, ACQUIRED                 | 0                                       | 0          | 1                                          | 0.234         | 0(0-Inf)               |
| DEFORMITY, PAROTID, ACQUIRED                  | 1                                       | 7.3831     | 3                                          | 0.9146        | 8.0722(0.8122-80.2313) |
| DEFORMITY, PELVIS, ACQUIRED                   | 0                                       | 0          | 4                                          | 1.0352        | 0(0-Inf)               |
| DEFORMITY, PENIS, ACQUIRED                    | 0                                       | 0          | 2                                          | 0.7052        | 0(0-Inf)               |
| DEFORMITY, PENIS, CONGENITAL, NOS             | 0                                       | 0          | 1                                          | 0.888         | 0(0-Inf)               |
| DEFORMITY, PHARYNX, ACQUIRED                  | 0                                       | 0          | 9                                          | 2.2985        | 0(0-Inf)               |
| DEFORMITY, PITUITARY                          | 0                                       | 0          | 1                                          | 0.8877        | 0(0-Inf)               |

| Description                            | No. of Positive Cases with Disease Code |            | No. of Positive Controls with Disease Code |               | Relative Risk (95%CI)    |
|----------------------------------------|-----------------------------------------|------------|--------------------------------------------|---------------|--------------------------|
|                                        |                                         | Case Rate* |                                            | Control Rate* |                          |
| DEFORMITY, PLANOVALGUS, CONGENITAL     | 0                                       | 0          | 1                                          | 0.2729        | 0(0-Inf)                 |
| DEFORMITY, PROSTATE, ACQUIRED          | 0                                       | 0          | 17                                         | 13.758        | 0(0-Inf)                 |
| DEFORMITY, PROSTATE, CONGENITAL, NOS   | 0                                       | 0          | 1                                          | 0.4751        | 0(0-Inf)                 |
| DEFORMITY, PUPIL, CONGENITAL, NOS      | 1                                       | 7.2178     | 0                                          | 0             | 12743758077.8832(0-Inf)  |
| DEFORMITY, PYLORUS, ACQUIRED           | 3                                       | 25.097     | 50                                         | 18.8097       | 1.3343(0.4143-4.2968)    |
| DEFORMITY, PYLORUS, CONGENITAL, NOS    | 0                                       | 0          | 3                                          | 1.058         | 0(0-Inf)                 |
| DEFORMITY, RADIUS, ACQUIRED, NOS       | 0                                       | 0          | 1                                          | 0.8538        | 0(0-Inf)                 |
| DEFORMITY, RECTUM, ACQUIRED            | 0                                       | 0          | 5                                          | 1.6796        | 0(0-Inf)                 |
| DEFORMITY, RIB, ACQUIRED, NOS          | 0                                       | 0          | 4                                          | 1.0353        | 0(0-Inf)                 |
| DEFORMITY, ROUND BACK                  | 0                                       | 0          | 2                                          | 0.4681        | 0(0-Inf)                 |
| DEFORMITY, SHOULDER, CONGENITAL        | 0                                       | 0          | 1                                          | 0.234         | 0(0-Inf)                 |
| DEFORMITY, SHOULDER, NOS               | 1                                       | 7.2449     | 10                                         | 2.8896        | 2.5072(0.3164-19.8668)   |
| DEFORMITY, SINUS, ACQUIRED             | 0                                       | 0          | 4                                          | 1.1418        | 0(0-Inf)                 |
| DEFORMITY, SINUS, CONGENITAL, NOS      | 0                                       | 0          | 2                                          | 0.5475        | 0(0-Inf)                 |
| DEFORMITY, SKIN, ACQUIRED              | 0                                       | 0          | 6                                          | 1.9226        | 0(0-Inf)                 |
| DEFORMITY, SKULL, ACQUIRED             | 0                                       | 0          | 3                                          | 1.5758        | 0(0-Inf)                 |
| DEFORMITY, SKULL, CONGENITAL           | 0                                       | 0          | 1                                          | 0.2354        | 0(0-Inf)                 |
| DEFORMITY, SPINE, CONGENITAL           | 0                                       | 0          | 5                                          | 1.596         | 0(0-Inf)                 |
| DEFORMITY, SPINE, NOS                  | 0                                       | 0          | 35                                         | 8.7856        | 0(0-Inf)                 |
| DEFORMITY, STERNUM, NOS                | 1                                       | 8.9555     | 5                                          | 2.185         | 4.0987(0.4719-35.5955)   |
| DEFORMITY, STOMACH, ACQUIRED, NOS      | 2                                       | 19.929     | 16                                         | 7.9496        | 2.5069(0.5713-11.0003)   |
| DEFORMITY, TIBIA, ACQUIRED, NOS        | 0                                       | 0          | 3                                          | 0.8018        | 0(0-Inf)                 |
| DEFORMITY, TOE                         | 1                                       | 7.7367     | 21                                         | 4.7453        | 1.6304(0.2174-12.2252)   |
| DEFORMITY, TOE, ACQUIRED               | 8                                       | 62.9545    | 127                                        | 42.9746       | 1.4649(0.7148-3.0023)    |
| DEFORMITY, TOE, CONGENITAL             | 0                                       | 0          | 4                                          | 0.8839        | 0(0-Inf)                 |
| DEFORMITY, TONGUE, ACQUIRED            | 0                                       | 0          | 2                                          | 0.4708        | 0(0-Inf)                 |
| DEFORMITY, TRUNK, ACQUIRED             | 1                                       | 9.1321     | 4                                          | 1.7378        | 5.255(0.5734-48.16)      |
| DEFORMITY, ULNA, NOS                   | 1                                       | 7.4669     | 4                                          | 1.2609        | 5.922(0.6452-54.3594)    |
| DEFORMITY, UTERUS, ACQUIRED            | 0                                       | 0          | 1                                          | 0.234         | 0(0-Inf)                 |
| DEFORMITY, UVULA, ACQUIRED             | 0                                       | 0          | 5                                          | 4.7337        | 0(0-Inf)                 |
| DEFORMITY, VASCULAR                    | 0                                       | 0          | 6                                          | 1.8813        | 0(0-Inf)                 |
| DEFORMITY, WRIST, FLEXION              | 0                                       | 0          | 1                                          | 0.2354        | 0(0-Inf)                 |
| DEFORMITY, WRIST, NOS                  | 2                                       | 16.8478    | 21                                         | 8.0639        | 2.0893(0.4859-8.9829)    |
| DEGENERATION, BRAIN (SENILE)           | 0                                       | 0          | 3                                          | 3.8511        | 0(0-Inf)                 |
| DEGENERATION, BRAIN, NOS               | 4                                       | 40.476     | 33                                         | 16.7323       | 2.419(0.8518-6.87)       |
| DEGENERATION, CEREBROSPINAL            | 0                                       | 0          | 5                                          | 1.526         | 0(0-Inf)                 |
| DEGENERATION, CHORIORETINAL CONGENITAL | 1                                       | 9.1549     | 2                                          | 0.5418        | 16.8977(1.4718-193.9976) |
| DEGENERATION, CHOROID                  | 0                                       | 0          | 1                                          | 0.2354        | 0(0-Inf)                 |
| DEGENERATION, CILIARY BODY             | 0                                       | 0          | 1                                          | 0.8528        | 0(0-Inf)                 |
| DEGENERATION, CORNEAL                  | 0                                       | 0          | 13                                         | 3.5674        | 0(0-Inf)                 |

| Description                                                | No. of Positive Cases with Disease Code | Case Rate* | No. of Positive Controls with Disease Code | Control Rate* | Relative Risk (95%CI)  |
|------------------------------------------------------------|-----------------------------------------|------------|--------------------------------------------|---------------|------------------------|
| DEGENERATION, CORNEAL NEC                                  | 0                                       | 0          | 1                                          | 0.853         | 0(0-Inf)               |
| DEGENERATION, CYSTOID, MACULA                              | 0                                       | 0          | 1                                          | 0.8528        | 0(0-Inf)               |
| DEGENERATION, DISC, SEE ALSO DISEASE, DISC, DEGENERATIVE   | 0                                       | 0          | 1                                          | 0.2354        | 0(0-Inf)               |
| DEGENERATION, EYE NOS                                      | 0                                       | 0          | 9                                          | 2.9141        | 0(0-Inf)               |
| DEGENERATION, JOINT, SEE ALSO DISEASE, JOINT, DEGENERATIVE | 0                                       | 0          | 3                                          | 1.5115        | 0(0-Inf)               |
| DEGENERATION, LATTICE                                      | 4                                       | 27.7594    | 134                                        | 33.9738       | 0.8171(0.3015-2.2141)  |
| DEGENERATION, MACULAR, EXUDATIVE, SENILE                   | 1                                       | 16.4927    | 18                                         | 18.5223       | 0.8904(0.1184-6.6942)  |
| DEGENERATION, MACULAR, NOS                                 | 65                                      | 987.2116   | 1232                                       | 1042.625      | 0.9469(0.7374-1.2158)  |
| DEGENERATION, MACULAR, SENILE/AGE RELATED                  | 40                                      | 616.381    | 756                                        | 670.1596      | 0.9198(0.6688-1.2648)  |
| DEGENERATION, MENISCUS                                     | 3                                       | 21.9373    | 158                                        | 46.9201       | 0.4675(0.149-1.4676)   |
| DEGENERATION, MYOPIC                                       | 0                                       | 0          | 18                                         | 5.3309        | 0(0-Inf)               |
| DEGENERATION, NERVE, AXILLARY                              | 0                                       | 0          | 1                                          | 0.2729        | 0(0-Inf)               |
| DEGENERATION, NERVE, PERIPHERAL                            | 0                                       | 0          | 1                                          | 0.2354        | 0(0-Inf)               |
| DEGENERATION, OVARY, CYSTIC                                | 0                                       | 0          | 1                                          | 0.2354        | 0(0-Inf)               |
| DEGENERATION, RETICULAR, SENILE                            | 0                                       | 0          | 1                                          | 0.8878        | 0(0-Inf)               |
| DEGENERATION, RETINA, COBBLESTONE                          | 0                                       | 0          | 8                                          | 2.6907        | 0(0-Inf)               |
| DEGENERATION, RETINA, NOS                                  | 3                                       | 21.7233    | 53                                         | 15.2868       | 1.421(0.4419-4.5696)   |
| DEGENERATION, RETINA, PAVING STONE                         | 1                                       | 7.1225     | 14                                         | 3.8986        | 1.8269(0.2377-14.0404) |
| DEGENERATION, RETINA, PIGMENTARY                           | 0                                       | 0          | 4                                          | 1.0712        | 0(0-Inf)               |
| DEGENERATION, ROTATOR CUFF                                 | 4                                       | 39.9108    | 21                                         | 10.3996       | 3.8377(1.3062-11.2753) |
| DEGENERATION, SALZMANN                                     | 0                                       | 0          | 19                                         | 9.7964        | 0(0-Inf)               |
| DEGENERATION, SKIN, NOS                                    | 2                                       | 18.1669    | 10                                         | 4.3124        | 4.2127(0.9094-19.5154) |
| DEGENERATION, STRIATONIGRAL                                | 0                                       | 0          | 1                                          | 0.8533        | 0(0-Inf)               |
| DEGENERATION, STRIATOPERONEAL                              | 0                                       | 0          | 1                                          | 0.234         | 0(0-Inf)               |
| DEGENERATION, VITREORETINAL                                | 0                                       | 0          | 1                                          | 0.398         | 0(0-Inf)               |
| DEGENERATION, VITREOUS                                     | 6                                       | 47.1717    | 31                                         | 7.2913        | 6.4696(2.6704-15.6737) |
| DEHISCENCE, LEVATOR (PALPEBRAE)                            | 0                                       | 0          | 4                                          | 1.9689        | 0(0-Inf)               |
| DEHISCENCE, NOS (POST OP WOUND)                            | 8                                       | 68.717     | 145                                        | 57.5957       | 1.1931(0.5841-2.4369)  |
| DEHYDRATION, HYPERTONIC                                    | 0                                       | 0          | 2                                          | 0.8102        | 0(0-Inf)               |
| DEHYDRATION, NOS                                           | 75                                      | 949.5114   | 1387                                       | 955.1731      | 0.9941(0.7875-1.2548)  |
| DELAY, BUNDLE-CONDUCTION, RIGHT                            | 0                                       | 0          | 3                                          | 0.7798        | 0(0-Inf)               |
| DELAY, CONDUCTION                                          | 1                                       | 7.291      | 19                                         | 5.8123        | 1.2544(0.1668-9.4322)  |
| DELAYED, DEVELOPMENT                                       | 0                                       | 0          | 3                                          | 0.9608        | 0(0-Inf)               |
| DELAYED, MENSES                                            | 0                                       | 0          | 4                                          | 1.5933        | 0(0-Inf)               |
| DELIRIUM, CAUSE SPECIFIED                                  | 5                                       | 68.4486    | 47                                         | 37.4899       | 1.8258(0.7236-4.6072)  |
| DELIRIUM, NOS                                              | 42                                      | 747.7478   | 470                                        | 520.7189      | 1.436(1.0464-1.9706)   |
| DELIRIUM, TREMENS                                          | 0                                       | 0          | 10                                         | 2.6056        | 0(0-Inf)               |
| DELIVERY, BY CESAREAN SECTION                              | 0                                       | 0          | 10                                         | 6.6194        | 0(0-Inf)               |
| DELIVERY, MULTIPLE, PREGNANCY, NOS                         | 0                                       | 0          | 2                                          | 1.1376        | 0(0-Inf)               |

| Description                                                     | No. of Positive Cases with Disease Code | Case Rate* | No. of Positive Controls with Disease Code | Control Rate* | Relative Risk (95%CI)   |
|-----------------------------------------------------------------|-----------------------------------------|------------|--------------------------------------------|---------------|-------------------------|
| DELLEN CORNEA                                                   | 1                                       | 8.6972     | 12                                         | 4.8585        | 1.7901(0.2305-13.8999)  |
| DELUSIONS, NOS                                                  | 1                                       | 11.0549    | 114                                        | 67.0744       | 0.1648(0.023-1.1813)    |
| DELUSIONS, PARASITOSIS                                          | 0                                       | 0          | 11                                         | 5.1012        | 0(0-Inf)                |
| DEMENTIA, ALCOHOLIC                                             | 0                                       | 0          | 9                                          | 4.4238        | 0(0-Inf)                |
| DEMENTIA, ALZHEIMER'S TYPE, NOS                                 | 21                                      | 357.3135   | 347                                        | 375.5666      | 0.9514(0.6119-1.4792)   |
| DEMENTIA, ALZHEIMER'S TYPE, SENILE                              | 6                                       | 107.2522   | 130                                        | 153.2049      | 0.7001(0.3085-1.5887)   |
| DEMENTIA, MULTI-INFARCT                                         | 6                                       | 108.2036   | 132                                        | 154.0163      | 0.7025(0.3097-1.5939)   |
| DEMENTIA, NOS, (NON-PSYCHOTIC)(DEGENERATIVE)                    | 99                                      | 1965.827   | 1486                                       | 1888.0785     | 1.0412(0.8491-1.2766)   |
| DEMENTIA, NOS, PSYCHOTIC                                        | 3                                       | 57.24      | 62                                         | 82.6225       | 0.6928(0.2172-2.21)     |
| DEMENTIA, PARANOID                                              | 0                                       | 0          | 12                                         | 18.5176       | 0(0-Inf)                |
| DEMENTIA, PRESENILE                                             | 0                                       | 0          | 18                                         | 13.2247       | 0(0-Inf)                |
| DEMENTIA, PUGILISTICA                                           | 0                                       | 0          | 1                                          | 2.4857        | 0(0-Inf)                |
| DEMENTIA, SENILE                                                | 5                                       | 87.0607    | 72                                         | 83.4785       | 1.0429(0.4206-2.5862)   |
| DENERVATION                                                     | 0                                       | 0          | 6                                          | 3.592         | 0(0-Inf)                |
| DENSITY LUNG/PULMONARY (ABNORMAL X-RAY)                         | 0                                       | 0          | 9                                          | 4.1199        | 0(0-Inf)                |
| DENTAL, DIAGNOSIS UNSPECIFIED (TOOTH)                           | 2                                       | 15.2286    | 22                                         | 7.0351        | 2.1647(0.5044-9.2893)   |
| DENTAL, HYGIENE                                                 | 51                                      | 377.6104   | 1286                                       | 372.0247      | 1.015(0.7666-1.3439)    |
| DENTAL, PROPHYLAXIS                                             | 4                                       | 30.2529    | 38                                         | 11.9825       | 2.5248(0.8945-7.1259)   |
| DENTITION, ADULT                                                | 1                                       | 7.0227     | 9                                          | 2.4817        | 2.8298(0.3534-22.6566)  |
| DEPENDENCE, VALIUM / LIBRIUM / ATIVAN / DALMANE                 | 0                                       | 0          | 6                                          | 2.6224        | 0(0-Inf)                |
| DEPENDENCE, AMPHETAMINES                                        | 0                                       | 0          | 2                                          | 1.1973        | 0(0-Inf)                |
| DEPENDENCE, CAFFEINE                                            | 0                                       | 0          | 9                                          | 2.3757        | 0(0-Inf)                |
| DEPENDENCE, DRUG, BARBITURATES, NOS                             | 0                                       | 0          | 7                                          | 1.8254        | 0(0-Inf)                |
| DEPENDENCE, DRUG, CODEINE (TYLOX)                               | 0                                       | 0          | 3                                          | 0.7461        | 0(0-Inf)                |
| DEPENDENCE, DRUG, HALLUCINOGENICS                               | 0                                       | 0          | 1                                          | 0.4049        | 0(0-Inf)                |
| DEPENDENCE, DRUG, HEROIN                                        | 0                                       | 0          | 1                                          | 0.4751        | 0(0-Inf)                |
| DEPENDENCE, DRUG, HYPNOTICS AND SEDATIVES/TRANQUILIZERS         | 7                                       | 48.8204    | 82                                         | 20.6038       | 2.3695(1.0895-5.1533)   |
| DEPENDENCE, DRUG, MARIHUANA (HASH, CANNABIS)                    | 0                                       | 0          | 4                                          | 1.3552        | 0(0-Inf)                |
| DEPENDENCE, DRUG, METHADONE                                     | 1                                       | 10.1113    | 0                                          | 0             | 14212070883.5825(0-Inf) |
| DEPENDENCE, DRUG, NEC                                           | 2                                       | 14.6263    | 24                                         | 7.0757        | 2.0671(0.4845-8.8202)   |
| DEPENDENCE, DRUG, NOS--CDPN                                     | 0                                       | 0          | 67                                         | 15.9901       | 0(0-Inf)                |
| DEPENDENCE, DRUG, OPIATE, OPIUM, OPIUM ALKALOIDS/DERIVATIVES    | 0                                       | 0          | 9                                          | 2.1608        | 0(0-Inf)                |
| DEPENDENCE, DRUG, PHENOBARBITAL                                 | 0                                       | 0          | 1                                          | 0.4048        | 0(0-Inf)                |
| DEPENDENCE, DRUG, PSYCHOSTIMULANTS                              | 0                                       | 0          | 9                                          | 2.0504        | 0(0-Inf)                |
| DEPENDENCE, DRUG, SYNTHETIC ANALGESIC WITH MORPHINE-LIKE EFFECT | 0                                       | 0          | 11                                         | 2.8722        | 0(0-Inf)                |
| DEPENDENCE, NARCOTIC, NEC/NOS                                   | 1                                       | 8.3999     | 19                                         | 7.243         | 1.1597(0.1542-8.7247)   |
| DEPENDENCE, OPIOIDS                                             | 1                                       | 7.8382     | 17                                         | 5.7406        | 1.3654(0.1802-10.3459)  |

| Description                                            | No. of Positive Cases with Disease Code | Case Rate* | No. of Positive Controls with Disease Code | Control Rate* | Relative Risk (95%CI)  |
|--------------------------------------------------------|-----------------------------------------|------------|--------------------------------------------|---------------|------------------------|
| DEPLETION, EXTRACELLULAR VOLUME                        | 3                                       | 31.8484    | 75                                         | 41.6209       | 0.7652(0.2407-2.4325)  |
| DEPLETION, IRON                                        | 0                                       | 0          | 2                                          | 0.5069        | 0(0-Inf)               |
| DEPOSIT, CORNEAL NOS                                   | 0                                       | 0          | 3                                          | 1.5112        | 0(0-Inf)               |
| DEPOSIT, HEMOSIDERIN, EYE                              | 0                                       | 0          | 1                                          | 0.234         | 0(0-Inf)               |
| DEPOSIT, HEMOSIDERIN, NOS                              | 0                                       | 0          | 13                                         | 3.2027        | 0(0-Inf)               |
| DEPOSIT, METALLIC, LENS                                | 0                                       | 0          | 1                                          | 0.4049        | 0(0-Inf)               |
| DEPRESSION, AGITATED, NOS                              | 8                                       | 64.4294    | 74                                         | 25.9479       | 2.483(1.1912-5.1757)   |
| DEPRESSION, ANXIETY                                    | 3                                       | 21.1077    | 84                                         | 22.287        | 0.9471(0.2984-3.0059)  |
| DEPRESSION, BIPOLAR                                    | 2                                       | 14.7629    | 32                                         | 9.7434        | 1.5152(0.361-6.3597)   |
| DEPRESSION, CHRONIC                                    | 7                                       | 56.1529    | 175                                        | 61.4813       | 0.9133(0.4281-1.9484)  |
| DEPRESSION, ENDOGENOUS                                 | 1                                       | 7.5263     | 55                                         | 12.4552       | 0.6043(0.0833-4.3816)  |
| DEPRESSION, HYSTERICAL                                 | 0                                       | 0          | 2                                          | 0.5838        | 0(0-Inf)               |
| DEPRESSION, MANIC, DEPRESSED TYPE                      | 0                                       | 0          | 10                                         | 3.7381        | 0(0-Inf)               |
| DEPRESSION, MANIC, MANIC TYPE                          | 0                                       | 0          | 11                                         | 3.0285        | 0(0-Inf)               |
| DEPRESSION, MANIC, NOS                                 | 4                                       | 31.2556    | 40                                         | 9.7849        | 3.1943(1.1348-8.9915)  |
| DEPRESSION, NEUROSIS                                   | 0                                       | 0          | 1                                          | 0.2354        | 0(0-Inf)               |
| DEPRESSION, NEUROTIC                                   | 1                                       | 12.1193    | 31                                         | 8.8832        | 1.3643(0.1853-10.0439) |
| DEPRESSION, NOS--DPR                                   | 193                                     | 1653.163   | 4608                                       | 1600.6648     | 1.0328(0.8939-1.1933)  |
| DEPRESSION, POSTPARTUM                                 | 0                                       | 0          | 1                                          | 0.8272        | 0(0-Inf)               |
| DEPRESSION, PSYCHONEUROTIC                             | 0                                       | 0          | 1                                          | 0.4049        | 0(0-Inf)               |
| DEPRESSION, PSYCHOTIC, NOS                             | 4                                       | 36.0636    | 87                                         | 37.3185       | 0.9664(0.3536-2.6407)  |
| DEPRESSION, PSYCHOTIC, REACTIVE                        | 0                                       | 0          | 1                                          | 0.2729        | 0(0-Inf)               |
| DEPRESSION, RECURRENT                                  | 18                                      | 132.4821   | 530                                        | 155.5464      | 0.8517(0.5318-1.3641)  |
| DEPRESSION, RESPIRATORY, NOS                           | 0                                       | 0          | 2                                          | 1.7755        | 0(0-Inf)               |
| DEPRESSION, STATE (ACUTE)                              | 13                                      | 183.2111   | 172                                        | 54.349        | 3.371(1.913-5.9404)    |
| DEPRESSION, UNIPOLAR                                   | 0                                       | 0          | 22                                         | 6.8053        | 0(0-Inf)               |
| DEPRIVATION, SLEEP                                     | 1                                       | 6.9496     | 34                                         | 8.9681        | 0.7749(0.1056-5.686)   |
| DERANGEMENT, ANKLE, OLD                                | 0                                       | 0          | 4                                          | 1.2148        | 0(0-Inf)               |
| DERANGEMENT, ELBOW                                     | 0                                       | 0          | 2                                          | 0.5069        | 0(0-Inf)               |
| DERANGEMENT, HAND, OLD                                 | 0                                       | 0          | 2                                          | 0.7896        | 0(0-Inf)               |
| DERANGEMENT, HIP, CURRENT                              | 0                                       | 0          | 1                                          | 0.234         | 0(0-Inf)               |
| DERANGEMENT, HIP, OLD                                  | 0                                       | 0          | 1                                          | 0.234         | 0(0-Inf)               |
| DERANGEMENT, JOINT, INTERNAL, (OLD), NOS               | 1                                       | 6.9399     | 12                                         | 3.0246        | 2.2945(0.2947-17.8648) |
| DERANGEMENT, JOINT, SEE ALSO RUPTURE, LIGAMENT BY SITE | 0                                       | 0          | 3                                          | 0.7175        | 0(0-Inf)               |
| DERANGEMENT, KNEE, CRUCIATE LIGAMENT, CURRENT          | 0                                       | 0          | 1                                          | 0.2729        | 0(0-Inf)               |
| DERANGEMENT, KNEE, CRUCIATE LIGAMENT, OLD              | 0                                       | 0          | 2                                          | 0.5475        | 0(0-Inf)               |
| DERANGEMENT, KNEE, INTERNAL, OLD                       | 3                                       | 21.0083    | 93                                         | 23.0803       | 0.9102(0.2875-2.8819)  |
| DERANGEMENT, KNEE, MENISCUS, CURRENT                   | 2                                       | 15.0306    | 18                                         | 4.5269        | 3.3203(0.763-14.4496)  |
| DERANGEMENT, KNEE, MENISCUS, OLD                       | 11                                      | 78.6673    | 268                                        | 66.0202       | 1.1916(0.6508-2.1817)  |
| DERANGEMENT, KNEE, NOS, CURRENT                        | 2                                       | 16.0228    | 74                                         | 18.271        | 0.877(0.2146-3.5833)   |

| Description                                                       | No. of Positive Cases with Disease Code | Case Rate* | No. of Positive Controls with Disease Code | Control Rate* | Relative Risk (95%CI)  |
|-------------------------------------------------------------------|-----------------------------------------|------------|--------------------------------------------|---------------|------------------------|
| DERANGEMENT, KNEE, NOS, OLD                                       | 1                                       | 6.9459     | 26                                         | 6.5066        | 1.0675(0.144-7.9145)   |
| DERANGEMENT, SHOULDER, OLD                                        | 0                                       | 0          | 4                                          | 3.0041        | 0(0-Inf)               |
| DERANGEMENT, SPINE, OLD                                           | 1                                       | 7.0469     | 12                                         | 2.8586        | 2.4652(0.3165-19.2026) |
| DERANGEMENT, TEMPOROMANDIBULAR JOINT (OLD)                        | 0                                       | 0          | 14                                         | 3.7784        | 0(0-Inf)               |
| DERMACHALASIS                                                     | 11                                      | 78.7141    | 190                                        | 52.1823       | 1.5084(0.8192-2.7777)  |
| DERMATITIS, ACNEIFORM                                             | 0                                       | 0          | 1                                          | 0.234         | 0(0-Inf)               |
| DERMATITIS, ACTINIC                                               | 0                                       | 0          | 15                                         | 4.0126        | 0(0-Inf)               |
| DERMATITIS, ACUTE                                                 | 6                                       | 42.1941    | 246                                        | 59.2846       | 0.7117(0.3161-1.6024)  |
| DERMATITIS, ALLERGIC, SEE ALSO DERMATITIS                         | 16                                      | 112.7529   | 277                                        | 71.338        | 1.5805(0.9527-2.6222)  |
| DERMATITIS, ARTEFACTA                                             | 0                                       | 0          | 2                                          | 1.1376        | 0(0-Inf)               |
| DERMATITIS, ASTEATOTIC                                            | 16                                      | 129.2913   | 418                                        | 148.6046      | 0.87(0.5274-1.4352)    |
| DERMATITIS, ATOPIC                                                | 3                                       | 21.11      | 154                                        | 36.6378       | 0.5762(0.1834-1.8098)  |
| DERMATITIS, CERCARIAL                                             | 0                                       | 0          | 2                                          | 0.5837        | 0(0-Inf)               |
| DERMATITIS, CHRONIC                                               | 24                                      | 173.9457   | 649                                        | 185.7134      | 0.9366(0.6225-1.4093)  |
| DERMATITIS, CONTACT, DUE TO ADHESIVE                              | 0                                       | 0          | 7                                          | 2.236         | 0(0-Inf)               |
| DERMATITIS, CONTACT, DUE TO ALCOHOL                               | 0                                       | 0          | 1                                          | 0.234         | 0(0-Inf)               |
| DERMATITIS, CONTACT, DUE TO CHEMICAL                              | 1                                       | 7.4114     | 58                                         | 13.9133       | 0.5327(0.0736-3.8555)  |
| DERMATITIS, CONTACT, DUE TO DETERGENTS                            | 0                                       | 0          | 6                                          | 1.9282        | 0(0-Inf)               |
| DERMATITIS, CONTACT, DUE TO GREASE                                | 0                                       | 0          | 1                                          | 0.398         | 0(0-Inf)               |
| DERMATITIS, CONTACT, DUE TO MEDICINE, TOPICAL                     | 1                                       | 6.9458     | 35                                         | 8.9656        | 0.7747(0.1056-5.681)   |
| DERMATITIS, CONTACT, DUE TO METAL                                 | 0                                       | 0          | 12                                         | 3.5425        | 0(0-Inf)               |
| DERMATITIS, CONTACT, DUE TO OIL                                   | 0                                       | 0          | 1                                          | 0.2354        | 0(0-Inf)               |
| DERMATITIS, CONTACT, DUE TO SOLVENTS                              | 0                                       | 0          | 2                                          | 0.796         | 0(0-Inf)               |
| DERMATITIS, CONTACT, DUE TO SUNSCREEN                             | 0                                       | 0          | 1                                          | 0.2354        | 0(0-Inf)               |
| DERMATITIS, CONTACT, EYELID                                       | 0                                       | 0          | 14                                         | 3.1415        | 0(0-Inf)               |
| DERMATITIS, CONTACT, NOS                                          | 54                                      | 402.009    | 1577                                       | 395.7006      | 1.0159(0.774-1.3336)   |
| DERMATITIS, CONTACT, POISON IVY                                   | 0                                       | 0          | 40                                         | 10.6646       | 0(0-Inf)               |
| DERMATITIS, COSMETICS                                             | 0                                       | 0          | 9                                          | 2.7113        | 0(0-Inf)               |
| DERMATITIS, DEODORANTS                                            | 0                                       | 0          | 3                                          | 0.7461        | 0(0-Inf)               |
| DERMATITIS, DIABETIC (CODE ALSO TYPE SPECIFIED)                   | 0                                       | 0          | 4                                          | 2.1573        | 0(0-Inf)               |
| DERMATITIS, DIAPER                                                | 1                                       | 22.2337    | 7                                          | 10.5217       | 2.1131(0.2585-17.2726) |
| DERMATITIS, DIAPER, MONILIAL / CANDIDAL                           | 1                                       | 22.1094    | 0                                          | 0             | 137118529523.59(0-Inf) |
| DERMATITIS, DRUG INDUCED, CODE ALSO EFFECT ADVERSE DRUG SPECIFIED | 1                                       | 8.6064     | 26                                         | 10.319        | 0.834(0.1126-6.1778)   |
| DERMATITIS, DUE TO PLANTS                                         | 1                                       | 7.0587     | 28                                         | 6.9073        | 1.0219(0.1383-7.5512)  |
| DERMATITIS, DYSHIDROTIC                                           | 0                                       | 0          | 10                                         | 2.309         | 0(0-Inf)               |
| DERMATITIS, ECZEMATOID, INFECTIOUS                                | 5                                       | 35.2073    | 93                                         | 22.8202       | 1.5428(0.6251-3.8079)  |
| DERMATITIS, ECZEMATOUS EYELID                                     | 0                                       | 0          | 7                                          | 1.6619        | 0(0-Inf)               |
| DERMATITIS, ECZEMATOUS/ECZEMATOID                                 | 1                                       | 8.2101     | 92                                         | 33.8559       | 0.2425(0.0337-1.7426)  |
| DERMATITIS, EOSINOPHILIC                                          | 0                                       | 0          | 17                                         | 5.4438        | 0(0-Inf)               |

| Description                                            | No. of Positive Cases with Disease Code | Case Rate* | No. of Positive Controls with Disease Code | Control Rate* | Relative Risk (95%CI)    |
|--------------------------------------------------------|-----------------------------------------|------------|--------------------------------------------|---------------|--------------------------|
| DERMATITIS, EXFOLIATIVE                                | 0                                       | 0          | 4                                          | 1.5795        | 0(0-Inf)                 |
| DERMATITIS, EYELID, HERPES ZOSTER                      | 0                                       | 0          | 1                                          | 2.4858        | 0(0-Inf)                 |
| DERMATITIS, FACTITIAL                                  | 1                                       | 6.9356     | 10                                         | 2.4731        | 2.8045(0.3534-22.258)    |
| DERMATITIS, FUNGAL                                     | 0                                       | 0          | 37                                         | 21.09         | 0(0-Inf)                 |
| DERMATITIS, HAIR DYE                                   | 0                                       | 0          | 2                                          | 0.4681        | 0(0-Inf)                 |
| DERMATITIS, HERPETICUM                                 | 0                                       | 0          | 5                                          | 3.2919        | 0(0-Inf)                 |
| DERMATITIS, HERPETIFORM                                | 0                                       | 0          | 22                                         | 5.1593        | 0(0-Inf)                 |
| DERMATITIS, HIEMALIS (WINTER)                          | 0                                       | 0          | 5                                          | 2.3435        | 0(0-Inf)                 |
| DERMATITIS, HOT TUB (OK TO USE WITH OTHER DERM DX)     | 0                                       | 0          | 4                                          | 1.5793        | 0(0-Inf)                 |
| DERMATITIS, IMPETIGINOUS                               | 1                                       | 7.0326     | 29                                         | 7.8598        | 0.8948(0.1212-6.6031)    |
| DERMATITIS, IRRITANT                                   | 30                                      | 214.732    | 785                                        | 196.9778      | 1.0901(0.7562-1.5715)    |
| DERMATITIS, LICHENOID                                  | 4                                       | 31.1986    | 84                                         | 28.0565       | 1.112(0.4064-3.0424)     |
| DERMATITIS, MEDICAMENTOSA                              | 0                                       | 0          | 16                                         | 6.2133        | 0(0-Inf)                 |
| DERMATITIS, NOS--DERM                                  | 144                                     | 1188.862   | 4292                                       | 1468.8392     | 0.8094(0.6852-0.956)     |
| DERMATITIS, NUMMULAR                                   | 10                                      | 81.0668    | 199                                        | 70.7729       | 1.1454(0.6057-2.166)     |
| DERMATITIS, POISON IVY                                 | 0                                       | 0          | 41                                         | 12.2761       | 0(0-Inf)                 |
| DERMATITIS, POISON OAK                                 | 0                                       | 0          | 5                                          | 1.4723        | 0(0-Inf)                 |
| DERMATITIS, PSORIASIFORM (SEE ALSO PSORIASIS)          | 3                                       | 22.5517    | 75                                         | 23.68         | 0.9524(0.2994-3.0297)    |
| DERMATITIS, RADIATION                                  | 2                                       | 16.9682    | 22                                         | 8.5301        | 1.9892(0.464-8.527)      |
| DERMATITIS, REPENS                                     | 0                                       | 0          | 1                                          | 1.0369        | 0(0-Inf)                 |
| DERMATITIS, RHUS                                       | 2                                       | 19.3044    | 134                                        | 35.2738       | 0.5473(0.1352-2.2149)    |
| DERMATITIS, SEBORRHEIC                                 | 76                                      | 602.68     | 1802                                       | 593.016       | 1.0163(0.8073-1.2793)    |
| DERMATITIS, SENSITIVITY                                | 0                                       | 0          | 2                                          | 0.4853        | 0(0-Inf)                 |
| DERMATITIS, SOLAR                                      | 0                                       | 0          | 7                                          | 1.851         | 0(0-Inf)                 |
| DERMATITIS, STASIS                                     | 18                                      | 169.4865   | 471                                        | 213.1601      | 0.7951(0.4961-1.2745)    |
| DERMATITIS, STASIS, WITH ULCER, LOWER EXTREMITY        | 0                                       | 0          | 9                                          | 2.3763        | 0(0-Inf)                 |
| DERMATITIS, SUNBURN                                    | 0                                       | 0          | 2                                          | 0.5069        | 0(0-Inf)                 |
| DERMATITIS, TRAUMATIC                                  | 0                                       | 0          | 4                                          | 1.112         | 0(0-Inf)                 |
| DERMATITIS, ULTRAVIOLET                                | 1                                       | 7.6159     | 1                                          | 0.2398        | 31.7547(1.8709-538.9689) |
| DERMATITIS, VARICOSE                                   | 0                                       | 0          | 1                                          | 0.8532        | 0(0-Inf)                 |
| DERMATITIS, VENENATA, NOS SEE ALSO DERMATITIS, CONTACT | 0                                       | 0          | 23                                         | 6.8525        | 0(0-Inf)                 |
| DERMATITIS, VENENATA, POISON IVY                       | 0                                       | 0          | 6                                          | 1.6491        | 0(0-Inf)                 |
| DERMATOCHALASIS, ACQUIRED (NOS)                        | 16                                      | 138.443    | 592                                        | 235.359       | 0.5882(0.3577-0.9674)    |
| DERMATOCHALASIS, CONGENITAL                            | 0                                       | 0          | 1                                          | 0.4049        | 0(0-Inf)                 |
| DERMATOFIBROMA, HEAD                                   | 4                                       | 27.9732    | 65                                         | 17.1494       | 1.6311(0.5916-4.4976)    |
| DERMATOFIBROMA, LOWER EXTREMITY                        | 10                                      | 81.211     | 304                                        | 72.8238       | 1.1152(0.5929-2.0975)    |
| DERMATOFIBROMA, NECK                                   | 2                                       | 14.0857    | 64                                         | 15.2138       | 0.9259(0.2258-3.7969)    |
| DERMATOFIBROMA, NOS                                    | 16                                      | 116.3141   | 386                                        | 91.4437       | 1.272(0.7701-2.1009)     |
| DERMATOFIBROMA, TRUNK                                  | 4                                       | 28.1978    | 183                                        | 44.0434       | 0.6402(0.2373-1.7273)    |
| DERMATOFIBROMA, UPPER EXTREMITY                        | 12                                      | 109.3196   | 190                                        | 48.5338       | 2.2524(1.2532-4.0484)    |

| Description                                                            | No. of Positive Cases with Disease Code | Case Rate* | No. of Positive Controls with Disease Code | Control Rate* | Relative Risk (95%CI)    |
|------------------------------------------------------------------------|-----------------------------------------|------------|--------------------------------------------|---------------|--------------------------|
| DERMATOFIBROSARCOMA PROTUBERANS (CODE ALSO NEOPLASM MALIGNANT BY SITE) | 0                                       | 0          | 2                                          | 0.432         | 0(0-Inf)                 |
| DERMATOGRAPHIA, NOS                                                    | 2                                       | 14.2156    | 100                                        | 23.6684       | 0.6006(0.1478-2.4409)    |
| DERMATOHELIOSIS                                                        | 10                                      | 88.1259    | 262                                        | 107.8033      | 0.8175(0.4341-1.5394)    |
| DERMATOLYSIS                                                           | 1                                       | 13.4522    | 1                                          | 0.7524        | 17.8797(1.0881-293.7924) |
| DERMATOMYCOSIS, NOS                                                    | 0                                       | 0          | 3                                          | 0.7064        | 0(0-Inf)                 |
| DERMATOMYOSITIS                                                        | 0                                       | 0          | 13                                         | 3.3406        | 0(0-Inf)                 |
| DERMATOPHYTOSIS, FINGERNAIL (UNGUIUM)                                  | 0                                       | 0          | 2                                          | 1.1974        | 0(0-Inf)                 |
| DERMATOPHYTOSIS, FOOT                                                  | 0                                       | 0          | 12                                         | 3.5722        | 0(0-Inf)                 |
| DERMATOPHYTOSIS, GENITAL                                               | 0                                       | 0          | 6                                          | 3.9705        | 0(0-Inf)                 |
| DERMATOPHYTOSIS, GROIN                                                 | 0                                       | 0          | 19                                         | 10.3226       | 0(0-Inf)                 |
| DERMATOPHYTOSIS, HAND (MANUS)                                          | 1                                       | 7.2264     | 44                                         | 11.3525       | 0.6366(0.0874-4.6335)    |
| DERMATOPHYTOSIS, NOS, SEE ALSO TINEA                                   | 2                                       | 13.8464    | 24                                         | 6.3336        | 2.1862(0.5129-9.3176)    |
| DERMATOPHYTOSIS, TOENAIL (UNGUIUM)                                     | 1                                       | 7.0779     | 17                                         | 4.247         | 1.6666(0.2201-12.6211)   |
| DERMATOSCLEROSIS                                                       | 1                                       | 7.0344     | 23                                         | 6.111         | 1.1511(0.1543-8.5861)    |
| DERMATOSIS, LINEAR (IGA)                                               | 0                                       | 0          | 1                                          | 0.4048        | 0(0-Inf)                 |
| DERMATOSIS, NOS                                                        | 3                                       | 21.9968    | 53                                         | 15.6685       | 1.4039(0.4365-4.5152)    |
| DERMATOSIS, PAPULOSA NIGRA                                             | 1                                       | 9.9378     | 2                                          | 0.5184        | 19.1685(1.6609-221.2261) |
| DERMATOSIS, PROGRESSIVE PIGMENTARY                                     | 0                                       | 0          | 1                                          | 0.3526        | 0(0-Inf)                 |
| DERMATOSIS, PURPURIC                                                   | 2                                       | 15.9468    | 11                                         | 3.8601        | 4.1312(0.903-18.8993)    |
| DERMATOSIS, PUSTULAR SUBCORNEAL                                        | 0                                       | 0          | 6                                          | 1.7431        | 0(0-Inf)                 |
| DERMATOSIS, SCHAMBERG'S                                                | 0                                       | 0          | 1                                          | 0.2728        | 0(0-Inf)                 |
| DERMOLIPOMA                                                            | 0                                       | 0          | 1                                          | 0.398         | 0(0-Inf)                 |
| DERMOPATHY PRETIBIAL (THYROID#)                                        | 0                                       | 0          | 2                                          | 0.432         | 0(0-Inf)                 |
| DESATURATION, ARTERIAL                                                 | 0                                       | 0          | 2                                          | 1.1973        | 0(0-Inf)                 |
| DESATURATION, OXYGEN                                                   | 4                                       | 45.9468    | 64                                         | 39.232        | 1.1712(0.4252-3.2258)    |
| DESCEMETOCELE                                                          | 0                                       | 0          | 2                                          | 0.5908        | 0(0-Inf)                 |
| DESCENSUS CERVICAL STUMP                                               | 0                                       | 0          | 1                                          | 0.4049        | 0(0-Inf)                 |
| DESCENSUS, CERVICAL STUMP, GR 3                                        | 0                                       | 0          | 1                                          | 0.2354        | 0(0-Inf)                 |
| DESCENSUS, URETHRA, SEE ALSO PROLAPSE                                  | 0                                       | 0          | 1                                          | 0.2354        | 0(0-Inf)                 |
| DESCENSUS, UTERINE                                                     | 2                                       | 33.4197    | 131                                        | 58.2718       | 0.5735(0.1416-2.3223)    |
| DESCENSUS, UTERINE, GR 1                                               | 0                                       | 0          | 34                                         | 17.6814       | 0(0-Inf)                 |
| DESCENSUS, UTERINE, GR 2                                               | 3                                       | 51.5182    | 201                                        | 90.5085       | 0.5692(0.1817-1.7828)    |
| DESCENSUS, UTERINE, GR 3                                               | 2                                       | 27.7219    | 138                                        | 64.3028       | 0.4311(0.1065-1.7447)    |
| DESCENSUS, UTERINE, GR 4                                               | 1                                       | 14.5711    | 41                                         | 23.8152       | 0.6118(0.0838-4.4671)    |
| DESICCATION (SEE ALSO DRY)                                             | 0                                       | 0          | 2                                          | 0.4853        | 0(0-Inf)                 |
| DESQUAMATION (SKIN#)                                                   | 1                                       | 7.5865     | 14                                         | 4.4357        | 1.7103(0.2225-13.1485)   |
| DESTRUCTION, BONE, NONTRAUMATIC                                        | 3                                       | 23.4717    | 56                                         | 18.8807       | 1.2432(0.3875-3.9886)    |
| DETACHMENT, APHAKIC                                                    | 3                                       | 22.9519    | 3                                          | 0.7766        | 29.5549(5.8078-150.3986) |
| DETACHMENT, CHOROICAL                                                  | 0                                       | 0          | 3                                          | 2.0483        | 0(0-Inf)                 |



| Description                                                                   | No. of Positive Cases with Disease Code | Case Rate* | No. of Positive Controls with Disease Code | Control Rate* | Relative Risk (95%CI)    |
|-------------------------------------------------------------------------------|-----------------------------------------|------------|--------------------------------------------|---------------|--------------------------|
| DETACHMENT, EPITHELIAL, PIGMENTED                                             | 2                                       | 20.0062    | 56                                         | 27.9593       | 0.7155(0.1741-2.9406)    |
| DETACHMENT, KNEE                                                              | 0                                       | 0          | 3                                          | 0.9284        | 0(0-Inf)                 |
| DETACHMENT, MACULA                                                            | 2                                       | 17.2213    | 6                                          | 2.3787        | 7.2399(1.4309-36.6319)   |
| DETACHMENT, PIGMENT EPITHELIUM, SEROUS                                        | 1                                       | 13.5795    | 1                                          | 0.7551        | 17.9846(1.0958-295.1687) |
| DETACHMENT, PIGMENTED EPITHELIUM, HEMORRHAGIC                                 | 0                                       | 0          | 10                                         | 8.6025        | 0(0-Inf)                 |
| DETACHMENT, RETINA, NEC                                                       | 2                                       | 14.633     | 13                                         | 3.8326        | 3.818(0.8491-17.1668)    |
| DETACHMENT, RETINA, NOS                                                       | 15                                      | 108.2899   | 268                                        | 75.552        | 1.4333(0.8504-2.4159)    |
| DETACHMENT, RETINA, PARTIAL, OLD                                              | 0                                       | 0          | 1                                          | 0.8886        | 0(0-Inf)                 |
| DETACHMENT, RETINA, TOTAL OR SUBTOTAL                                         | 0                                       | 0          | 3                                          | 1.3879        | 0(0-Inf)                 |
| DETACHMENT, RETINA, TOTAL, OLD                                                | 0                                       | 0          | 7                                          | 2.3202        | 0(0-Inf)                 |
| DETACHMENT, RETINAL, SEROUS                                                   | 0                                       | 0          | 3                                          | 3.8491        | 0(0-Inf)                 |
| DETACHMENT, TRACTION, RETINA                                                  | 0                                       | 0          | 6                                          | 2.296         | 0(0-Inf)                 |
| DETACHMENT, VITREOUS (PVD)                                                    | 33                                      | 242.1785   | 1363                                       | 399.2905      | 0.6065(0.4291-0.8573)    |
| DETERIORATION (MENTAL)                                                        | 2                                       | 26.0422    | 12                                         | 8.8989        | 2.9265(0.6491-13.1941)   |
| DETRUSOR SEE ALSO AREFLEXIA                                                   | 2                                       | 22.7777    | 40                                         | 24.339        | 0.9359(0.2254-3.886)     |
| DEVIATION, EYE, SKEW                                                          | 0                                       | 0          | 13                                         | 7.3113        | 0(0-Inf)                 |
| DEVIATION, EYE/OCULAR, NOS                                                    | 2                                       | 21.5933    | 27                                         | 15.1077       | 1.4293(0.3381-6.0415)    |
| DEVIATION, NASAL SEPTUM, CONGENITAL                                           | 1                                       | 8.0913     | 68                                         | 17.5248       | 0.4617(0.064-3.3323)     |
| DEVIATION, NASAL SEPTUM, NOS                                                  | 10                                      | 71.1325    | 443                                        | 127.0948      | 0.5597(0.2988-1.0485)    |
| DEVIATION, SEXUAL, NEC                                                        | 0                                       | 0          | 1                                          | 0.398         | 0(0-Inf)                 |
| DEVIATION, TRACHEA                                                            | 0                                       | 0          | 14                                         | 6.2977        | 0(0-Inf)                 |
| DEVIL'S, PINCHES (PURPURA SIMPLEX)                                            | 0                                       | 0          | 1                                          | 0.398         | 0(0-Inf)                 |
| DEXTROCARDIA                                                                  | 0                                       | 0          | 1                                          | 0.4048        | 0(0-Inf)                 |
| DIABETES INSIPIDUS, NEPHROGENIC                                               | 1                                       | 6.9879     | 8                                          | 2.1555        | 3.2419(0.3989-26.3443)   |
| DIABETES INSIPIDUS, NOS                                                       | 1                                       | 7.5356     | 16                                         | 5.0665        | 1.4873(0.1956-11.3122)   |
| DIABETES INSIPIDUS, SECONDARY                                                 | 0                                       | 0          | 3                                          | 0.7798        | 0(0-Inf)                 |
| DIABETES MELLITUS, BORDERLINE                                                 | 4                                       | 35.7181    | 61                                         | 25.6835       | 1.3907(0.5038-3.8387)    |
| DIABETES MELLITUS, COMPLICATION, NEC--DMM                                     | 15                                      | 125.6644   | 318                                        | 121.1853      | 1.037(0.6169-1.743)      |
| DIABETES MELLITUS, DIET CONTROL ONLY                                          | 12                                      | 110.8972   | 341                                        | 151.1309      | 0.7338(0.4121-1.3065)    |
| DIABETES MELLITUS, GANGRENE COMPLICATION--DMG                                 | 0                                       | 0          | 1                                          | 0.8528        | 0(0-Inf)                 |
| DIABETES MELLITUS, GESTATIONAL                                                | 0                                       | 0          | 3                                          | 1.5107        | 0(0-Inf)                 |
| DIABETES MELLITUS, HYPOGLYCEMIC, CODE ALSO EFFECT ADVERSE ANTIDIABETIC AGENT  | 1                                       | 11.7571    | 9                                          | 5.6875        | 2.0672(0.2593-16.4773)   |
| DIABETES MELLITUS, INSULIN DEPENDENT                                          | 24                                      | 197.6454   | 627                                        | 230.2818      | 0.8583(0.5704-1.2915)    |
| DIABETES MELLITUS, JUVENILE                                                   | 0                                       | 0          | 1                                          | 1.0364        | 0(0-Inf)                 |
| DIABETES MELLITUS, JUVENILE, WITH COMP., INSULIN DEPENDENT , CODE ALSO COMP   | 0                                       | 0          | 1                                          | 0.2354        | 0(0-Inf)                 |
| DIABETES MELLITUS, JUVENILE, WITH COMPLICATION, CODE ALSO COMPLICATION STATED | 0                                       | 0          | 1                                          | 0.398         | 0(0-Inf)                 |
| DIABETES MELLITUS, LATENT                                                     | 1                                       | 7.1608     | 4                                          | 1.019         | 7.0274(0.7667-64.4095)   |

| Description                                                                | No. of Positive Cases with Disease Code | Case Rate* | No. of Positive Controls with Disease Code | Control Rate* | Relative Risk (95%CI)   |
|----------------------------------------------------------------------------|-----------------------------------------|------------|--------------------------------------------|---------------|-------------------------|
| DIABETES MELLITUS, NEURO COMPLICATION, CODE COMP. IF TYPE STATED--DMN      | 21                                      | 173.5255   | 559                                        | 207.855       | 0.8348(0.5395-1.2919)   |
| DIABETES MELLITUS, NON INSULIN DEPENDENT, ON INSULIN -- DIABX              | 7                                       | 53.7115    | 73                                         | 23.7723       | 2.2594(1.0355-4.9298)   |
| DIABETES MELLITUS, NOS--DIAB                                               | 112                                     | 907.7111   | 2596                                       | 853.7653      | 1.0632(0.8795-1.2853)   |
| DIABETES MELLITUS, OPHTHALMIC COMPLICATION, CODE COMPLICATION STATED--DMO  | 14                                      | 105.6918   | 342                                        | 108.1306      | 0.9774(0.5719-1.6705)   |
| DIABETES MELLITUS, PROVISIONAL (SUSPECT, RULE OUT, POSSIBLE,)              | 3                                       | 21.9698    | 118                                        | 35.1          | 0.6259(0.1986-1.973)    |
| DIABETES MELLITUS, STEROID INDUCED (CODE ALSO EFFECT, ADVERSE STEROID NEC) | 7                                       | 66.8622    | 89                                         | 41.4301       | 1.6139(0.7453-3.4947)   |
| DIABETES MELLITUS, TYPE 1                                                  | 2                                       | 15.105     | 85                                         | 27.158        | 0.5562(0.1366-2.2654)   |
| DIABETES MELLITUS, TYPE 2                                                  | 74                                      | 686.7926   | 2043                                       | 903.6558      | 0.76(0.6024-0.9589)     |
| DIABETES MELLITUS, ULCER COMPLICATION--DMU                                 | 1                                       | 7.3235     | 27                                         | 8.2626        | 0.8863(0.1199-6.5545)   |
| DIABETES, CHEMICAL                                                         | 0                                       | 0          | 14                                         | 3.4306        | 0(0-Inf)                |
| DIABETES, PRE                                                              | 1                                       | 8.0744     | 2                                          | 0.712         | 11.3398(0.9852-130.526) |
| DIABETIC TRIOPATHY                                                         | 1                                       | 6.9242     | 14                                         | 3.7201        | 1.8613(0.2425-14.2878)  |
| DIAGNOSIS, DEFERRED                                                        | 0                                       | 0          | 27                                         | 6.4439        | 0(0-Inf)                |
| DIAGNOSIS, NO NEUROLOGIC--NNDX                                             | 0                                       | 0          | 45                                         | 12.29         | 0(0-Inf)                |
| DIAGNOSIS, PREVIOUSLY CODED THIS YEAR                                      | 12                                      | 138.0853   | 230                                        | 67.2501       | 2.0533(1.1467-3.6766)   |
| DIALYSIS, RENAL, (NOS)                                                     | 5                                       | 51.4776    | 99                                         | 51.4944       | 0.9997(0.4062-2.4605)   |
| DIALYSIS, RETINAL                                                          | 0                                       | 0          | 1                                          | 0.2354        | 0(0-Inf)                |
| DIARRHEA, ALLERGIC                                                         | 2                                       | 13.9841    | 38                                         | 9.8247        | 1.4234(0.3413-5.9362)   |
| DIARRHEA, BACTERIAL                                                        | 0                                       | 0          | 1                                          | 0.8529        | 0(0-Inf)                |
| DIARRHEA, BILE SALT                                                        | 0                                       | 0          | 6                                          | 2.7536        | 0(0-Inf)                |
| DIARRHEA, CAMPYLOBACTER                                                    | 0                                       | 0          | 9                                          | 3.6321        | 0(0-Inf)                |
| DIARRHEA, CHOLERAIC                                                        | 0                                       | 0          | 3                                          | 0.8034        | 0(0-Inf)                |
| DIARRHEA, DIABETIC                                                         | 0                                       | 0          | 8                                          | 1.9777        | 0(0-Inf)                |
| DIARRHEA, DRUG-INDUCED, CODE ALSO EFFECT, ADVERSE BY DRUG, IF STATED       | 5                                       | 46.1864    | 88                                         | 38.9367       | 1.1862(0.4803-2.9298)   |
| DIARRHEA, DYSENTERIC                                                       | 0                                       | 0          | 1                                          | 0.2354        | 0(0-Inf)                |
| DIARRHEA, FUNCTIONAL                                                       | 0                                       | 0          | 8                                          | 1.857         | 0(0-Inf)                |
| DIARRHEA, GIARDIAL                                                         | 0                                       | 0          | 9                                          | 2.2236        | 0(0-Inf)                |
| DIARRHEA, INFECTIOUS                                                       | 0                                       | 0          | 56                                         | 13.4186       | 0(0-Inf)                |
| DIARRHEA, NOS                                                              | 95                                      | 823.0711   | 2393                                       | 905.9551      | 0.9085(0.7397-1.1159)   |
| DIARRHEA, POST CHOLECYSTECTOMY                                             | 0                                       | 0          | 11                                         | 3.318         | 0(0-Inf)                |
| DIARRHEA, POST VAGOTOMY                                                    | 0                                       | 0          | 7                                          | 1.5706        | 0(0-Inf)                |
| DIARRHEA, TRAVELER'S                                                       | 1                                       | 7.0486     | 34                                         | 9.4013        | 0.7497(0.1022-5.5009)   |
| DIARRHEA, VIRAL, SEE ALSO ENTERITIS                                        | 0                                       | 0          | 4                                          | 1.2653        | 0(0-Inf)                |
| DIASTASIS, MUSCLE, NOS                                                     | 0                                       | 0          | 3                                          | 0.6536        | 0(0-Inf)                |

| Description                                  | No. of Positive Cases with Disease Code | Case Rate* | No. of Positive Controls with Disease Code | Control Rate* | Relative Risk (95%CI)    |
|----------------------------------------------|-----------------------------------------|------------|--------------------------------------------|---------------|--------------------------|
| DIASTASIS, RECTI, NOS                        | 2                                       | 14.0013    | 44                                         | 12.1174       | 1.1555(0.2789-4.7866)    |
| DIASTEMA (TEETH)                             | 0                                       | 0          | 2                                          | 0.5069        | 0(0-Inf)                 |
| DIASTEMATOMYELIA                             | 0                                       | 0          | 1                                          | 0.2354        | 0(0-Inf)                 |
| DIATHESIS, ALLERGIC                          | 0                                       | 0          | 15                                         | 3.7619        | 0(0-Inf)                 |
| DIATHESIS, ATOPIC                            | 1                                       | 9.936      | 1                                          | 0.4945        | 20.0943(1.2015-336.0599) |
| DIATHESIS, BLEEDING                          | 0                                       | 0          | 7                                          | 1.7393        | 0(0-Inf)                 |
| DIATHESIS, GOUTY                             | 1                                       | 6.8984     | 6                                          | 1.588         | 4.3442(0.5142-36.6987)   |
| DIATHESIS, ULCER                             | 0                                       | 0          | 21                                         | 5.01          | 0(0-Inf)                 |
| DIATHESIS, URIC ACID                         | 0                                       | 0          | 1                                          | 0.2729        | 0(0-Inf)                 |
| DICHROMATOPSIA                               | 0                                       | 0          | 1                                          | 0.4048        | 0(0-Inf)                 |
| DIDELPHIC UTERUS                             | 0                                       | 0          | 2                                          | 0.4681        | 0(0-Inf)                 |
| DIENTAMOEBA FRAGILIS                         | 0                                       | 0          | 2                                          | 0.5709        | 0(0-Inf)                 |
| DIET INSTRUCTION                             | 16                                      | 112.5105   | 538                                        | 132.8146      | 0.8471(0.5146-1.3946)    |
| DIEULAFOY'S ULCER                            | 0                                       | 0          | 11                                         | 4.7451        | 0(0-Inf)                 |
| DIFFICULTY IN WALKING                        | 3                                       | 41.7971    | 29                                         | 24.1757       | 1.7289(0.5243-5.7013)    |
| DILATATION, AORTA                            | 2                                       | 18.9384    | 40                                         | 18.4338       | 1.0274(0.2473-4.268)     |
| DILATATION, AORTA, ABDOMINAL                 | 3                                       | 26.2066    | 38                                         | 15.4637       | 1.6947(0.5203-5.5196)    |
| DILATATION, AORTA, THORACIC                  | 0                                       | 0          | 19                                         | 10.83         | 0(0-Inf)                 |
| DILATATION, AORTA, THORACIC, ASCENDING       | 1                                       | 8.6428     | 46                                         | 18.693        | 0.4624(0.0636-3.3608)    |
| DILATATION, AORTA, THORACIC, DESCENDING      | 0                                       | 0          | 2                                          | 0.7896        | 0(0-Inf)                 |
| DILATATION, AORTIC ROOT                      | 0                                       | 0          | 41                                         | 15.1783       | 0(0-Inf)                 |
| DILATATION, AORTIC ROOT (CONGENITAL)         | 0                                       | 0          | 1                                          | 0.2354        | 0(0-Inf)                 |
| DILATATION, ARTERY, NOS                      | 1                                       | 7.0126     | 6                                          | 1.6059        | 4.3667(0.5143-37.0795)   |
| DILATATION, ARTERY, UPPER EXTREMITY          | 0                                       | 0          | 1                                          | 0.4049        | 0(0-Inf)                 |
| DILATATION, BASILAR ARTERY                   | 0                                       | 0          | 2                                          | 0.5475        | 0(0-Inf)                 |
| DILATATION, BILE DUCT, ACQUIRED              | 1                                       | 9.0843     | 36                                         | 15.7577       | 0.5765(0.0788-4.22)      |
| DILATATION, BILE DUCT, NOS                   | 2                                       | 17.6581    | 36                                         | 14.9155       | 1.1839(0.2836-4.9424)    |
| DILATATION, BLADDER, NOS                     | 0                                       | 0          | 3                                          | 1.9015        | 0(0-Inf)                 |
| DILATATION, BRAIN SPECIFIED PART (VENTRICLE) | 0                                       | 0          | 3                                          | 0.9608        | 0(0-Inf)                 |
| DILATATION, BRONCHUS                         | 0                                       | 0          | 1                                          | 0.2354        | 0(0-Inf)                 |
| DILATATION, CAPILLARY                        | 0                                       | 0          | 3                                          | 1.1478        | 0(0-Inf)                 |
| DILATATION, CARDIAC                          | 0                                       | 0          | 1                                          | 0.3526        | 0(0-Inf)                 |
| DILATATION, CAROTID ARTERY                   | 0                                       | 0          | 2                                          | 0.7896        | 0(0-Inf)                 |
| DILATATION, CEREBRAL ARTERY                  | 0                                       | 0          | 1                                          | 0.234         | 0(0-Inf)                 |
| DILATATION, CEREBRAL, NOS                    | 0                                       | 0          | 1                                          | 0.234         | 0(0-Inf)                 |
| DILATATION, CERVIX                           | 0                                       | 0          | 2                                          | 0.432         | 0(0-Inf)                 |
| DILATATION, COLON, NOS                       | 1                                       | 7.6766     | 15                                         | 4.9005        | 1.5665(0.205-11.9683)    |
| DILATATION, COMMON DUCT, CONGENITAL          | 0                                       | 0          | 1                                          | 0.4049        | 0(0-Inf)                 |
| DILATATION, DUODENUM                         | 0                                       | 0          | 4                                          | 1.6244        | 0(0-Inf)                 |
| DILATATION, ESOPHAGUS, DUE TO ACHALASIA      | 0                                       | 0          | 1                                          | 0.398         | 0(0-Inf)                 |

| Description                                             | No. of Positive Cases with Disease Code | Case Rate* | No. of Positive Controls with Disease Code | Control Rate* | Relative Risk (95%CI)    |
|---------------------------------------------------------|-----------------------------------------|------------|--------------------------------------------|---------------|--------------------------|
| DILATATION, ESOPHAGUS, NOS                              | 4                                       | 33.8704    | 30                                         | 11.6156       | 2.9159(1.0195-8.3397)    |
| DILATATION, GALLBLADDER                                 | 1                                       | 9.9207     | 1                                          | 0.4941        | 20.0789(1.2002-335.9162) |
| DILATATION, GASTRIC                                     | 1                                       | 8.9318     | 4                                          | 1.6899        | 5.2855(0.5776-48.3673)   |
| DILATATION, HAIR PORE                                   | 1                                       | 7.0258     | 11                                         | 2.6057        | 2.6963(0.3431-21.19)     |
| DILATATION, HEART, NOS                                  | 0                                       | 0          | 2                                          | 1.7057        | 0(0-Inf)                 |
| DILATATION, ILEUM                                       | 0                                       | 0          | 1                                          | 0.4048        | 0(0-Inf)                 |
| DILATATION, ILIAC ARTERY                                | 0                                       | 0          | 10                                         | 4.9157        | 0(0-Inf)                 |
| DILATATION, INGUINAL RING                               | 0                                       | 0          | 12                                         | 7.2621        | 0(0-Inf)                 |
| DILATATION, INTESTINE, NOS                              | 0                                       | 0          | 6                                          | 2.7533        | 0(0-Inf)                 |
| DILATATION, JEJUNUM                                     | 0                                       | 0          | 1                                          | 0.4048        | 0(0-Inf)                 |
| DILATATION, KIDNEY                                      | 0                                       | 0          | 6                                          | 1.9223        | 0(0-Inf)                 |
| DILATATION, MAMMARY DUCT                                | 0                                       | 0          | 10                                         | 2.1699        | 0(0-Inf)                 |
| DILATATION, PANCREATIC DUCT                             | 0                                       | 0          | 25                                         | 12.1512       | 0(0-Inf)                 |
| DILATATION, PELVIS, KIDNEY                              | 0                                       | 0          | 3                                          | 0.6536        | 0(0-Inf)                 |
| DILATATION, POPLITEAL ARTERY                            | 0                                       | 0          | 1                                          | 0.2729        | 0(0-Inf)                 |
| DILATATION, PORE                                        | 1                                       | 7.4634     | 40                                         | 12.3077       | 0.6064(0.0831-4.4268)    |
| DILATATION, PROSTATE                                    | 0                                       | 0          | 4                                          | 1.7191        | 0(0-Inf)                 |
| DILATATION, PULMONARY ARTERY                            | 0                                       | 0          | 4                                          | 0.8815        | 0(0-Inf)                 |
| DILATATION, PUPIL                                       | 1                                       | 6.9278     | 4                                          | 0.9721        | 7.1263(0.7698-65.9668)   |
| DILATATION, RECTUM                                      | 0                                       | 0          | 2                                          | 1.0782        | 0(0-Inf)                 |
| DILATATION, SALIVARY GLAND OR DUCT                      | 0                                       | 0          | 3                                          | 0.7461        | 0(0-Inf)                 |
| DILATATION, STOMACH                                     | 0                                       | 0          | 4                                          | 1.8403        | 0(0-Inf)                 |
| DILATATION, URETER, NOS                                 | 0                                       | 0          | 5                                          | 1.3366        | 0(0-Inf)                 |
| DILATATION, URETHRA                                     | 0                                       | 0          | 10                                         | 3.8021        | 0(0-Inf)                 |
| DILATATION, VEIN                                        | 1                                       | 7.2561     | 50                                         | 14.676        | 0.4944(0.0681-3.59)      |
| DILATATION, VENTRICLE, HEART                            | 0                                       | 0          | 16                                         | 5.3979        | 0(0-Inf)                 |
| DILATATION, VENULE, ANUS, SEE ALSO HEMORRHOIDS          | 0                                       | 0          | 1                                          | 0.3526        | 0(0-Inf)                 |
| DILATATION, VENULE, NOS                                 | 0                                       | 0          | 3                                          | 0.9773        | 0(0-Inf)                 |
| DILATATION, VERTEBRAL ARTERY                            | 0                                       | 0          | 1                                          | 0.2729        | 0(0-Inf)                 |
| DIMPLE (COCCYGEAL)                                      | 0                                       | 0          | 2                                          | 0.6774        | 0(0-Inf)                 |
| DIPLEGIA, NOS                                           | 0                                       | 0          | 5                                          | 1.1944        | 0(0-Inf)                 |
| DIPLEGIA, SPASTIC, INFANTILE                            | 0                                       | 0          | 2                                          | 0.8722        | 0(0-Inf)                 |
| DIPLOPHONIA                                             | 1                                       | 7.7773     | 0                                          | 0             | 17339563549.2038(0-Inf)  |
| DIPLOPIA                                                | 17                                      | 155.5229   | 335                                        | 144.4585      | 1.0766(0.6604-1.755)     |
| DISABILITY, DUE TO PHYSICAL COMPLAINTS / HEALTH         | 4                                       | 45.8309    | 53                                         | 32.3944       | 1.4148(0.5102-3.923)     |
| DISABILITY, LEARNING                                    | 0                                       | 0          | 3                                          | 0.7884        | 0(0-Inf)                 |
| DISABILITY, PERMANENT PARTIAL                           | 0                                       | 0          | 9                                          | 2.1131        | 0(0-Inf)                 |
| DISABILITY, SPECIFIC LANGUAGE                           | 1                                       | 14.8987    | 1                                          | 0.3477        | 42.8553(2.5543-719.0118) |
| DISABILITY, SPECIFIC LANGUAGE WITHOUT SPEECH IMPAIRMENT | 0                                       | 0          | 1                                          | 0.234         | 0(0-Inf)                 |
| DISABLED                                                | 2                                       | 13.9434    | 42                                         | 10.9939       | 1.2683(0.3054-5.2664)    |

| Description                                                            | No. of Positive Cases with Disease Code | Case Rate* | No. of Positive Controls with Disease Code | Control Rate* | Relative Risk (95%CI)    |
|------------------------------------------------------------------------|-----------------------------------------|------------|--------------------------------------------|---------------|--------------------------|
| DISARTICULATION (OSSICULAR) (FOR CURRENT INJURY- SEE FRACTURE MALLEUS) | 0                                       | 0          | 3                                          | 0.7799        | 0(0-Inf)                 |
| DISC, STRUCTURALLY FULL                                                | 1                                       | 7.306      | 5                                          | 1.4902        | 4.9026(0.5596-42.9515)   |
| DISC, TILTED                                                           | 0                                       | 0          | 3                                          | 0.8018        | 0(0-Inf)                 |
| DISCHARGE, BREAST (INCLUDES BLOODY)                                    | 3                                       | 45.1502    | 88                                         | 38.2245       | 1.1812(0.3723-3.7475)    |
| DISCHARGE, EAR                                                         | 1                                       | 8.6476     | 34                                         | 13.6712       | 0.6325(0.0863-4.6374)    |
| DISCHARGE, NASAL                                                       | 4                                       | 37.2026    | 32                                         | 14.3115       | 2.5995(0.9131-7.4007)    |
| DISCHARGE, NIPPLE (INCLUDES BLOODY)                                    | 1                                       | 14.8712    | 39                                         | 23.8898       | 0.6225(0.0851-4.5513)    |
| DISCHARGE, URETHRAL                                                    | 1                                       | 7.048      | 23                                         | 6.7453        | 1.0449(0.1404-7.7752)    |
| DISCHARGE, VAGINAL                                                     | 7                                       | 98.5793    | 193                                        | 86.6594       | 1.1375(0.5337-2.4247)    |
| DISCOID SEMILUNAR CARTILAGE                                            | 0                                       | 0          | 2                                          | 0.5069        | 0(0-Inf)                 |
| DISCOLORATION, TEETH POSTERUPTIVE                                      | 1                                       | 8.206      | 4                                          | 0.8769        | 9.3577(1.0106-86.6522)   |
| DISCOMFORT, EAR                                                        | 1                                       | 7.6689     | 42                                         | 13.6072       | 0.5636(0.0773-4.1105)    |
| DISCOMFORT, NOS, SEE ALSO PAIN                                         | 1                                       | 13.514     | 5                                          | 3.8402        | 3.519(0.4054-30.5438)    |
| DISCORDANCE, ATRIO-VENTRICULAR                                         | 0                                       | 0          | 3                                          | 2.6652        | 0(0-Inf)                 |
| DISCREPANCY LEG LENGTH SEE ALSO INEQUALITY                             | 3                                       | 31.5998    | 59                                         | 31.945        | 0.9892(0.3091-3.1655)    |
| DISEASE, ACID REFLUX                                                   | 2                                       | 17.0312    | 43                                         | 16.8013       | 1.0137(0.2446-4.2013)    |
| DISEASE, ACID-PEPTIC                                                   | 0                                       | 0          | 10                                         | 3.7999        | 0(0-Inf)                 |
| DISEASE, ADDISON'S, IDIOPATHIC                                         | 0                                       | 0          | 1                                          | 0.398         | 0(0-Inf)                 |
| DISEASE, ADDISON'S, NOS                                                | 0                                       | 0          | 8                                          | 2.3172        | 0(0-Inf)                 |
| DISEASE, ADRENAL, NOS                                                  | 1                                       | 8.115      | 82                                         | 29.5339       | 0.2748(0.0382-1.9775)    |
| DISEASE, ADULT STILL'S                                                 | 1                                       | 13.9953    | 1                                          | 0.8069        | 17.3439(1.0491-286.7213) |
| DISEASE, ALZHEIMER'S                                                   | 17                                      | 270.1705   | 299                                        | 290.6342      | 0.9296(0.5697-1.5169)    |
| DISEASE, AMYLOID, SEE ALSO AMYLOIDOSIS                                 | 0                                       | 0          | 1                                          | 0.8879        | 0(0-Inf)                 |
| DISEASE, ANORECTAL                                                     | 0                                       | 0          | 2                                          | 1.7082        | 0(0-Inf)                 |
| DISEASE, ANTRAL, ACUTE (RESP SINUS #)                                  | 0                                       | 0          | 1                                          | 0.3526        | 0(0-Inf)                 |
| DISEASE, AORTIC VALVULAR, CALCIFIC                                     | 0                                       | 0          | 1                                          | 0.3526        | 0(0-Inf)                 |
| DISEASE, AORTIC VALVULAR, CONGENITAL                                   | 0                                       | 0          | 1                                          | 0.234         | 0(0-Inf)                 |
| DISEASE, AORTIC VALVULAR, NOS                                          | 1                                       | 12.2651    | 75                                         | 50.9208       | 0.2409(0.0334-1.7346)    |
| DISEASE, AORTIC VALVULAR, RHEUMATIC                                    | 0                                       | 0          | 5                                          | 1.5559        | 0(0-Inf)                 |
| DISEASE, AORTOILIAC, OCCLUSIVE                                         | 0                                       | 0          | 48                                         | 17.783        | 0(0-Inf)                 |
| DISEASE, APPENDIX                                                      | 0                                       | 0          | 6                                          | 3.1065        | 0(0-Inf)                 |
| DISEASE, ARTERIAL, NEC                                                 | 1                                       | 7.2568     | 4                                          | 1.224         | 5.929(0.648-54.2484)     |
| DISEASE, ARTERIAL, NOS                                                 | 0                                       | 0          | 16                                         | 7.092         | 0(0-Inf)                 |
| DISEASE, ARTERIAL, PERIPHERAL                                          | 6                                       | 72.3424    | 118                                        | 76.3219       | 0.9479(0.4166-2.1565)    |
| DISEASE, ARTERIOSCLEROTIC CARDIOVASCULAR                               | 1                                       | 8.9591     | 27                                         | 11.4882       | 0.7799(0.1055-5.7632)    |
| DISEASE, ARTERIOSCLEROTIC PERIPHERAL                                   | 3                                       | 30.6645    | 30                                         | 15.4652       | 1.9828(0.6016-6.5348)    |
| DISEASE, ARTERIOSCLEROTIC, NOS, SEE ALSO ARTERIOSCLEROSIS              | 1                                       | 9.6222     | 73                                         | 34.4574       | 0.2792(0.0388-2.0123)    |

| Description                                              | No. of Positive Cases with Disease Code | Case Rate* | No. of Positive Controls with Disease Code | Control Rate* | Relative Risk (95%CI)   |
|----------------------------------------------------------|-----------------------------------------|------------|--------------------------------------------|---------------|-------------------------|
| DISEASE, ARTERIOSCLEROTIC, OCCLUSIVE, NEC/NOS - SEE ALSO |                                         |            |                                            |               |                         |
| ARTERIOSCLEROSIS BY SITE                                 | 0                                       | 0          | 17                                         | 10.4256       | 0(0-Inf)                |
| DISEASE, ARTERY, NEC                                     | 0                                       | 0          | 13                                         | 5.4834        | 0(0-Inf)                |
| DISEASE, ARYTENOID, NEC                                  | 0                                       | 0          | 7                                          | 2.3227        | 0(0-Inf)                |
| DISEASE, ATHEROEMBOLIC, EXTREMITY, NOS                   | 0                                       | 0          | 8                                          | 5.0349        | 0(0-Inf)                |
| DISEASE, AUTOIMMUNE                                      | 0                                       | 0          | 12                                         | 3.3365        | 0(0-Inf)                |
| DISEASE, A-V NODAL                                       | 0                                       | 0          | 7                                          | 5.5546        | 0(0-Inf)                |
| DISEASE, BACTERIAL, NEC                                  | 6                                       | 42.7774    | 86                                         | 20.2455       | 2.1129(0.9193-4.8565)   |
| DISEASE, BEHCET'S                                        | 0                                       | 0          | 1                                          | 0.234         | 0(0-Inf)                |
| DISEASE, BEST'S                                          | 0                                       | 0          | 2                                          | 0.5709        | 0(0-Inf)                |
| DISEASE, BILE DUCT (BILIARY), NEC/NOS                    | 0                                       | 0          | 6                                          | 2.4448        | 0(0-Inf)                |
| DISEASE, BILIARY TRACT                                   | 1                                       | 6.972      | 10                                         | 2.6328        | 2.6482(0.3342-20.9851)  |
| DISEASE, BINSWANGER'S                                    | 0                                       | 0          | 2                                          | 2.9785        | 0(0-Inf)                |
| DISEASE, BIPOLAR                                         | 4                                       | 27.8545    | 120                                        | 30.9295       | 0.9006(0.3317-2.445)    |
| DISEASE, BIPOLAR, MANIC PHASE                            | 1                                       | 7.0809     | 34                                         | 9.4539        | 0.749(0.1021-5.496)     |
| DISEASE, BIRD FANCIER'S                                  | 0                                       | 0          | 1                                          | 2.4857        | 0(0-Inf)                |
| DISEASE, BLADDER                                         | 4                                       | 43.1947    | 45                                         | 25.042        | 1.7249(0.6178-4.8157)   |
| DISEASE, BLISTERING (PRIMARY)                            | 0                                       | 0          | 2                                          | 1.1614        | 0(0-Inf)                |
| DISEASE, BONE, NOS                                       | 0                                       | 0          | 8                                          | 3.0879        | 0(0-Inf)                |
| DISEASE, BORST-JADASSOHN                                 | 0                                       | 0          | 2                                          | 0.7898        | 0(0-Inf)                |
| DISEASE, BOWEN'S                                         | 1                                       | 7.6817     | 12                                         | 3.9389        | 1.9502(0.2508-15.1652)  |
| DISEASE, BOWEN'S, MALIGNANT, CODE ALSO NEOPLASM          |                                         |            |                                            |               |                         |
| MALIGNANT BY SITE                                        | 0                                       | 0          | 1                                          | 0.4048        | 0(0-Inf)                |
| DISEASE, BRAIN, ARTERIAL                                 | 0                                       | 0          | 2                                          | 0.5909        | 0(0-Inf)                |
| DISEASE, BRAIN, ISCHEMIC                                 | 0                                       | 0          | 4                                          | 1.5792        | 0(0-Inf)                |
| DISEASE, BRAIN, NOS                                      | 0                                       | 0          | 5                                          | 3.126         | 0(0-Inf)                |
| DISEASE, BRAIN, ORGANIC                                  | 0                                       | 0          | 3                                          | 2.0478        | 0(0-Inf)                |
| DISEASE, BRAIN, SENILE                                   | 1                                       | 7.1771     | 0                                          | 0             | 12720181507.287(0-Inf)  |
| DISEASE, BRAIN, VASCULAR                                 | 0                                       | 0          | 3                                          | 1.1481        | 0(0-Inf)                |
| DISEASE, BREAST, CYSTIC                                  | 1                                       | 41.148     | 49                                         | 36.4132       | 1.13(0.1558-8.197)      |
| DISEASE, BREAST, FIBROCYSTIC--FBD                        | 71                                      | 1564.766   | 2863                                       | 1667.7204     | 0.9383(0.741-1.188)     |
| DISEASE, BREAST, NOS                                     | 6                                       | 43.0449    | 257                                        | 57.3332       | 0.7508(0.3335-1.6899)   |
| DISEASE, BRIGHT'S                                        | 0                                       | 0          | 1                                          | 0.2729        | 0(0-Inf)                |
| DISEASE, BRONCHUS, NEC                                   | 0                                       | 0          | 15                                         | 5.7175        | 0(0-Inf)                |
| DISEASE, BUCCAL CAVITY                                   | 1                                       | 10.1086    | 0                                          | 0             | 14205413350.0592(0-Inf) |
| DISEASE, CALCIUM PYROPHOSPHATE DEPOSITION                | 1                                       | 10.4098    | 37                                         | 19.5996       | 0.5311(0.0727-3.8825)   |
| DISEASE, CAPILLARY                                       | 0                                       | 0          | 4                                          | 0.8641        | 0(0-Inf)                |
| DISEASE, CARDIA, NOS                                     | 3                                       | 29.1944    | 28                                         | 13.3972       | 2.1791(0.6584-7.2128)   |
| DISEASE, CARDIOVASCULAR, HYPERTENSIVE                    | 0                                       | 0          | 14                                         | 6.1145        | 0(0-Inf)                |
| DISEASE, CARDIOVASCULAR, NOS                             | 7                                       | 93.2132    | 177                                        | 133.0653      | 0.7005(0.3287-1.4928)   |

| Description                                       | No. of Positive Cases with Disease Code | Case Rate* | No. of Positive Controls with Disease Code | Control Rate* | Relative Risk (95%CI)    |
|---------------------------------------------------|-----------------------------------------|------------|--------------------------------------------|---------------|--------------------------|
| DISEASE, CARDIOVASCULAR, RENAL                    | 0                                       | 0          | 1                                          | 0.8877        | 0(0-Inf)                 |
| DISEASE, CAROTID ARTERY                           | 7                                       | 71.323     | 292                                        | 150.5052      | 0.4739(0.2237-1.0039)    |
| DISEASE, CAROTID ARTERY, WITH PARALYSIS           | 0                                       | 0          | 1                                          | 0.2729        | 0(0-Inf)                 |
| DISEASE, CAT-SCRATCH                              | 0                                       | 0          | 2                                          | 0.8097        | 0(0-Inf)                 |
| DISEASE, CELIAC                                   | 0                                       | 0          | 20                                         | 6.8399        | 0(0-Inf)                 |
| DISEASE, CEREBELLAR, SEE ALSO DISEASE BRAIN       | 0                                       | 0          | 9                                          | 3.841         | 0(0-Inf)                 |
| DISEASE, CEREBROVASCULAR, ARTERIOSCLEROTIC        | 0                                       | 0          | 22                                         | 6.9641        | 0(0-Inf)                 |
| DISEASE, CEREBROVASCULAR, HYPERTENSIVE            | 0                                       | 0          | 2                                          | 1.776         | 0(0-Inf)                 |
| DISEASE, CEREBROVASCULAR, NOS                     | 24                                      | 303.9781   | 668                                        | 467.689       | 0.65(0.4322-0.9773)      |
| DISEASE, CEREBROVASCULAR, OCCLUSIVE/ISCHEMIC      | 0                                       | 0          | 17                                         | 10.1488       | 0(0-Inf)                 |
| DISEASE, CEREBROVASCULAR, OLD OR LATE EFFECT      | 0                                       | 0          | 48                                         | 47.4364       | 0(0-Inf)                 |
| DISEASE, CERVIX                                   | 0                                       | 0          | 3                                          | 0.7021        | 0(0-Inf)                 |
| DISEASE, CHARCOT-MARIE-TOOTH                      | 0                                       | 0          | 8                                          | 4.11          | 0(0-Inf)                 |
| DISEASE, CHARCOT'S JOINT (NEUROPATHIC)            | 1                                       | 7.1847     | 18                                         | 5.0836        | 1.4133(0.1871-10.6749)   |
| DISEASE, CHEEK, INNER                             | 0                                       | 0          | 1                                          | 0.3526        | 0(0-Inf)                 |
| DISEASE, CHOROID                                  | 0                                       | 0          | 6                                          | 3.6262        | 0(0-Inf)                 |
| DISEASE, CNS                                      | 2                                       | 17.8834    | 39                                         | 16.4326       | 1.0883(0.2616-4.5268)    |
| DISEASE, CNS, DEGENERATIVE                        | 5                                       | 64.7964    | 82                                         | 59.2758       | 1.0931(0.4421-2.7027)    |
| DISEASE, CNS, INFLAMMATORY                        | 0                                       | 0          | 1                                          | 0.398         | 0(0-Inf)                 |
| DISEASE, COGAN'S                                  | 0                                       | 0          | 2                                          | 0.4681        | 0(0-Inf)                 |
| DISEASE, COLD AGGLUTININ                          | 2                                       | 14.2925    | 2                                          | 0.5661        | 25.2495(3.4152-186.6752) |
| DISEASE, COLLAGEN (CONNECTIVE TISSUE#)            | 0                                       | 0          | 1                                          | 0.234         | 0(0-Inf)                 |
| DISEASE, COLLAGEN, ALLERGIC (VASCULAR#)           | 0                                       | 0          | 5                                          | 1.2713        | 0(0-Inf)                 |
| DISEASE, COMBINED SYSTEM                          | 0                                       | 0          | 2                                          | 0.5069        | 0(0-Inf)                 |
| DISEASE, CONJUNCTIVA, NOS                         | 2                                       | 15.9591    | 17                                         | 5.9612        | 2.6772(0.6126-11.7)      |
| DISEASE, CONNECTIVE TISSUE, MIXED                 | 0                                       | 0          | 16                                         | 3.858         | 0(0-Inf)                 |
| DISEASE, CONNECTIVE TISSUE, NOS                   | 1                                       | 6.932      | 55                                         | 13.0941       | 0.5294(0.073-3.837)      |
| DISEASE, CORONARY ARTERY--CAD                     | 199                                     | 2300.134   | 4765                                       | 2562.2797     | 0.8977(0.7787-1.0348)    |
| DISEASE, CORTICAL SPINAL TRACT                    | 0                                       | 0          | 1                                          | 0.8878        | 0(0-Inf)                 |
| DISEASE, CORTICOSPINAL                            | 0                                       | 0          | 1                                          | 2.4932        | 0(0-Inf)                 |
| DISEASE, CRANIAL NERVE                            | 0                                       | 0          | 2                                          | 0.8097        | 0(0-Inf)                 |
| DISEASE, CREUTZFELDT-JACOB (VIRAL ENCEPHALITIS#)  | 0                                       | 0          | 1                                          | 0.4048        | 0(0-Inf)                 |
| DISEASE, CRICOPHARYNGEAL, NEC/NOS                 | 1                                       | 12.3609    | 11                                         | 7.3869        | 1.6733(0.2144-13.0585)   |
| DISEASE, CROHN'S, NOS                             | 1                                       | 7.0939     | 76                                         | 18.2568       | 0.3886(0.0539-2.8004)    |
| DISEASE, CROHN'S, RECURRENT                       | 1                                       | 10.3713    | 19                                         | 5.1024        | 2.0326(0.2699-15.3096)   |
| DISEASE, CRYSTAL DEPOSITION (ARTHRITIS#)          | 0                                       | 0          | 17                                         | 6.2428        | 0(0-Inf)                 |
| DISEASE, CUSHINGOID, IATROGENIC (DUE TO STEROIDS) | 1                                       | 8.0568     | 7                                          | 2.4821        | 3.246(0.3921-26.8732)    |
| DISEASE, CUSHING'S                                | 0                                       | 0          | 8                                          | 2.0705        | 0(0-Inf)                 |
| DISEASE, CYTOMEGALIC INCLUSION                    | 2                                       | 18.9778    | 14                                         | 3.4754        | 5.4606(1.2232-24.3777)   |
| DISEASE, DARIER'S                                 | 0                                       | 0          | 1                                          | 0.3983        | 0(0-Inf)                 |

| Description                                          | No. of Positive Cases with Disease Code | Case Rate* | No. of Positive Controls with Disease Code | Control Rate* | Relative Risk (95%CI) |
|------------------------------------------------------|-----------------------------------------|------------|--------------------------------------------|---------------|-----------------------|
| DISEASE, DE QUERVAIN'S, TENDON SHEATH                | 1                                       | 8.7477     | 40                                         | 9.4549        | 0.9252(0.1266-6.7602) |
| DISEASE, DEGENERATIVE JOINT, CERVICAL--DJC           | 88                                      | 691.9196   | 1921                                       | 572.4485      | 1.2087(0.9755-1.4977) |
| DISEASE, DEGENERATIVE JOINT, LOWER EXTREMITIES--DJLE | 223                                     | 2322.609   | 5864                                       | 2492.4075     | 0.9319(0.8149-1.0656) |
| DISEASE, DEGENERATIVE JOINT, LUMBAR--DJL             | 86                                      | 714.9036   | 2082                                       | 694.7293      | 1.029(0.8288-1.2776)  |
| DISEASE, DEGENERATIVE JOINT, SPINE, NOS--DJS         | 60                                      | 554.4857   | 1328                                       | 531.1942      | 1.0438(0.8053-1.353)  |
| DISEASE, DEGENERATIVE JOINT, UPPER EXTREMITIES--DJUE | 127                                     | 1085.023   | 3274                                       | 1080.2998     | 1.0044(0.8408-1.1998) |
| DISEASE, DEMYELINATING (CNS)                         | 3                                       | 22.1988    | 35                                         | 8.1063        | 2.7385(0.8356-8.975)  |
| DISEASE, DENTAL ROOT, NOS                            | 1                                       | 7.1913     | 9                                          | 2.5438        | 2.827(0.3524-22.6785) |
| DISEASE, DEVIC'S                                     | 0                                       | 0          | 1                                          | 0.398         | 0(0-Inf)              |
| DISEASE, DIFFUSE LEWY BODY                           | 1                                       | 14.0954    | 14                                         | 11.2195       | 1.2563(0.1643-9.6038) |
| DISEASE, DISC, CERVICAL, NOS                         | 1                                       | 8.8292     | 69                                         | 18.2668       | 0.4833(0.067-3.4879)  |
| DISEASE, DISC, DEGENERATIVE, CERVICAL--DDDC          | 6                                       | 41.956     | 229                                        | 58.4348       | 0.718(0.3187-1.6178)  |
| DISEASE, DISC, DEGENERATIVE, LUMBAR--DDDL            | 20                                      | 146.632    | 511                                        | 146.7641      | 0.9991(0.6382-1.5641) |
| DISEASE, DISC, DEGENERATIVE, NOS--DDD                | 14                                      | 110.614    | 280                                        | 94.7847       | 1.167(0.681-1.9998)   |
| DISEASE, DISC, DEGENERATIVE, THORACIC--DDDT          | 0                                       | 0          | 13                                         | 5.9217        | 0(0-Inf)              |
| DISEASE, DISC, LUMBAR, NOS                           | 5                                       | 41.0946    | 275                                        | 69.9222       | 0.5877(0.2424-1.4251) |
| DISEASE, DISC, LUMBOSACRAL                           | 0                                       | 0          | 25                                         | 6.211         | 0(0-Inf)              |
| DISEASE, DISC, NOS                                   | 3                                       | 29.7123    | 45                                         | 11.94         | 2.4885(0.7688-8.0545) |
| DISEASE, DISC, SACRAL, NOS                           | 0                                       | 0          | 4                                          | 1.0274        | 0(0-Inf)              |
| DISEASE, DISC, THORACIC, NOS                         | 0                                       | 0          | 4                                          | 0.9157        | 0(0-Inf)              |
| DISEASE, DIVERTICULAR, COLON                         | 11                                      | 91.7813    | 243                                        | 90.8438       | 1.0103(0.5511-1.8521) |
| DISEASE, DUODENUM                                    | 1                                       | 8.6374     | 22                                         | 8.8118        | 0.9802(0.1314-7.3128) |
| DISEASE, DUPUYTREN'S                                 | 2                                       | 16.4101    | 56                                         | 20.9605       | 0.7829(0.1905-3.2169) |
| DISEASE, EAR                                         | 1                                       | 7.2121     | 54                                         | 15.58         | 0.4629(0.0639-3.3558) |
| DISEASE, EBSTEIN'S (CONGENITAL HEART#)               | 0                                       | 0          | 1                                          | 0.4048        | 0(0-Inf)              |
| DISEASE, ENVIRONMENTAL                               | 0                                       | 0          | 1                                          | 6.4965        | 0(0-Inf)              |
| DISEASE, EPIGLOTTIS, NEC                             | 0                                       | 0          | 10                                         | 3.375         | 0(0-Inf)              |
| DISEASE, ESOPHAGUS                                   | 2                                       | 18.0756    | 59                                         | 25.3343       | 0.7135(0.1738-2.9286) |
| DISEASE, EYE                                         | 4                                       | 28.0838    | 52                                         | 13.5273       | 2.0761(0.7464-5.7748) |
| DISEASE, EYE, INFLAMMATORY                           | 0                                       | 0          | 2                                          | 0.5908        | 0(0-Inf)              |
| DISEASE, FACTITIAL                                   | 0                                       | 0          | 3                                          | 0.7175        | 0(0-Inf)              |
| DISEASE, FANCONI'S                                   | 0                                       | 0          | 1                                          | 0.2729        | 0(0-Inf)              |
| DISEASE, FAVRE RACOUCHOT                             | 0                                       | 0          | 16                                         | 6.4355        | 0(0-Inf)              |
| DISEASE, FEMORAL, ATHEROMATOUS                       | 0                                       | 0          | 2                                          | 0.5709        | 0(0-Inf)              |
| DISEASE, FIBROCYSTIC, PANCREAS                       | 0                                       | 0          | 4                                          | 1.3528        | 0(0-Inf)              |
| DISEASE, FIBROMUSCULAR, ARTERY, NEC                  | 0                                       | 0          | 5                                          | 1.1158        | 0(0-Inf)              |
| DISEASE, FIBROMUSCULAR, RENAL ARTERY                 | 0                                       | 0          | 8                                          | 1.972         | 0(0-Inf)              |
| DISEASE, FIFTH                                       | 0                                       | 0          | 4                                          | 0.8839        | 0(0-Inf)              |
| DISEASE, FORDYCE                                     | 0                                       | 0          | 3                                          | 1.1481        | 0(0-Inf)              |
| DISEASE, FORDYCE-FOX (SWEAT GLAND#)                  | 0                                       | 0          | 1                                          | 0.398         | 0(0-Inf)              |



| Description                                                    | No. of Positive Cases with Disease Code | Case Rate* | No. of Positive Controls with Disease Code | Control Rate* | Relative Risk (95%CI)  |
|----------------------------------------------------------------|-----------------------------------------|------------|--------------------------------------------|---------------|------------------------|
| DISEASE, FORDYCE'S (CONGENITAL)                                | 0                                       | 0          | 3                                          | 0.7798        | 0(0-Inf)               |
| DISEASE, FORESTIER'S                                           | 0                                       | 0          | 1                                          | 0.3526        | 0(0-Inf)               |
| DISEASE, FREIBERG'S                                            | 0                                       | 0          | 1                                          | 0.8879        | 0(0-Inf)               |
| DISEASE, GALLBLADDER                                           | 1                                       | 8.0147     | 16                                         | 5.6183        | 1.4265(0.1875-10.854)  |
| DISEASE, GASTROINTESTINAL, NOS                                 | 2                                       | 14.6854    | 11                                         | 3.2565        | 4.5095(0.9829-20.69)   |
| DISEASE, GASTROINTESTINAL--GIFD                                | 25                                      | 191.4738   | 666                                        | 161.2221      | 1.1876(0.7956-1.7728)  |
| DISEASE, GENITAL ORGAN, FEMALE, NOS                            | 0                                       | 0          | 38                                         | 16.5642       | 0(0-Inf)               |
| DISEASE, GENITAL ORGAN, MALE, NOS                              | 0                                       | 0          | 18                                         | 9.8368        | 0(0-Inf)               |
| DISEASE, GILBERT'S                                             | 0                                       | 0          | 27                                         | 7.0238        | 0(0-Inf)               |
| DISEASE, GINGIVA                                               | 0                                       | 0          | 7                                          | 1.8163        | 0(0-Inf)               |
| DISEASE, GLANZMANN'S                                           | 0                                       | 0          | 1                                          | 0.4048        | 0(0-Inf)               |
| DISEASE, GLOTTIS, NEC                                          | 1                                       | 7.2798     | 11                                         | 3.2349        | 2.2504(0.2868-17.6548) |
| DISEASE, GRANULOMATOUS, COLON                                  | 0                                       | 0          | 1                                          | 0.8877        | 0(0-Inf)               |
| DISEASE, GRANULOMATOUS, LUNG                                   | 2                                       | 17.3647    | 6                                          | 2.4141        | 7.193(1.4201-36.4329)  |
| DISEASE, GRANULOMATOUS, NOS (WHITE BLOOD CELL DISORDER)        | 0                                       | 0          | 2                                          | 1.8981        | 0(0-Inf)               |
| DISEASE, GRAVES', EUTHYROID                                    | 1                                       | 9.2449     | 39                                         | 9.3374        | 0.9901(0.1354-7.2393)  |
| DISEASE, GRAVES', NOS                                          | 5                                       | 36.2721    | 212                                        | 48.4514       | 0.7486(0.3078-1.8207)  |
| DISEASE, GRAVES', WITH HYPERTHYROIDISM                         | 1                                       | 7.7034     | 50                                         | 11.3421       | 0.6792(0.0935-4.935)   |
| DISEASE, GRAVES', WITH OPHTHALMOPATHY                          | 0                                       | 0          | 44                                         | 10.2315       | 0(0-Inf)               |
| DISEASE, GROVER'S                                              | 0                                       | 0          | 23                                         | 8.1374        | 0(0-Inf)               |
| DISEASE, GUM, NEC                                              | 1                                       | 8.548      | 28                                         | 7.0448        | 1.2134(0.1642-8.9687)  |
| DISEASE, HABERMANN'S                                           | 0                                       | 0          | 1                                          | 0.398         | 0(0-Inf)               |
| DISEASE, HAGLUND'S (DEFORMITY)                                 | 0                                       | 0          | 8                                          | 1.9192        | 0(0-Inf)               |
| DISEASE, HAILEY-HAILEY                                         | 0                                       | 0          | 1                                          | 0.3526        | 0(0-Inf)               |
| DISEASE, HAIRY CELL                                            | 0                                       | 0          | 3                                          | 1.0579        | 0(0-Inf)               |
| DISEASE, HAND, FOOT, AND MOUTH                                 | 0                                       | 0          | 1                                          | 0.4751        | 0(0-Inf)               |
| DISEASE, HASHIMOTO'S                                           | 2                                       | 13.8333    | 56                                         | 13.5554       | 1.0205(0.2479-4.2013)  |
| DISEASE, HEART, AMYLOID                                        | 0                                       | 0          | 2                                          | 1.8983        | 0(0-Inf)               |
| DISEASE, HEART, ATHEROSCLEROTIC--ASHD                          | 22                                      | 186.1596   | 549                                        | 208.8557      | 0.8913(0.5815-1.3663)  |
| DISEASE, HEART, CLASS I                                        | 11                                      | 102.1469   | 311                                        | 139.9288      | 0.73(0.3996-1.3335)    |
| DISEASE, HEART, CLASS II                                       | 12                                      | 124.2059   | 311                                        | 162.1764      | 0.7659(0.4298-1.3647)  |
| DISEASE, HEART, CLASS III                                      | 12                                      | 130.4614   | 348                                        | 195.1409      | 0.6685(0.3757-1.1898)  |
| DISEASE, HEART, CLASS IV                                       | 7                                       | 85.7572    | 191                                        | 127.3295      | 0.6735(0.3164-1.4336)  |
| DISEASE, HEART, CLASS V                                        | 0                                       | 0          | 5                                          | 1.6798        | 0(0-Inf)               |
| DISEASE, HEART, CONGENITAL--CHD                                | 0                                       | 0          | 8                                          | 3.3156        | 0(0-Inf)               |
| DISEASE, HEART, CONGESTIVE, SEE ALSO FAILURE, CONGESTIVE HEART | 0                                       | 0          | 1                                          | 2.4856        | 0(0-Inf)               |
| DISEASE, HEART, CORONARY                                       | 34                                      | 401.2939   | 914                                        | 575.4797      | 0.6973(0.4949-0.9826)  |
| DISEASE, HEART, CYANOTIC (CONGENITAL#)                         | 0                                       | 0          | 1                                          | 0.3526        | 0(0-Inf)               |

| Description                                                         | No. of Positive Cases with Disease Code | Case Rate* | No. of Positive Controls with Disease Code | Control Rate* | Relative Risk (95%CI)    |
|---------------------------------------------------------------------|-----------------------------------------|------------|--------------------------------------------|---------------|--------------------------|
| DISEASE, HEART, DEGENERATIVE                                        | 0                                       | 0          | 3                                          | 3.8508        | 0(0-Inf)                 |
| DISEASE, HEART, FUNCTIONAL                                          | 1                                       | 13.521     | 0                                          | 0             | 20061141526.0188(0-Inf)  |
| DISEASE, HEART, HYPERTENSIVE, NOS                                   | 7                                       | 67.4541    | 75                                         | 35.2628       | 1.9129(0.8782-4.1668)    |
| DISEASE, HEART, ISCHEMIC, ASYMPTOMATIC                              | 0                                       | 0          | 1                                          | 0.2729        | 0(0-Inf)                 |
| DISEASE, HEART, ISCHEMIC, NOS--IHD                                  | 30                                      | 259.7837   | 604                                        | 238.7497      | 1.0881(0.7533-1.5717)    |
| DISEASE, HEART, MULTIVALVULAR                                       | 0                                       | 0          | 10                                         | 11.4257       | 0(0-Inf)                 |
| DISEASE, HEART, NOS                                                 | 8                                       | 91.1031    | 130                                        | 77.7193       | 1.1722(0.5729-2.3986)    |
| DISEASE, HEART, PULMONARY                                           | 0                                       | 0          | 2                                          | 0.7896        | 0(0-Inf)                 |
| DISEASE, HEART, RHEUMATIC, CLASS 1                                  | 0                                       | 0          | 3                                          | 0.8036        | 0(0-Inf)                 |
| DISEASE, HEART, RHEUMATIC, CLASS 2                                  | 0                                       | 0          | 1                                          | 0.4751        | 0(0-Inf)                 |
| DISEASE, HEART, RHEUMATIC, CLASS 3                                  | 0                                       | 0          | 1                                          | 0.234         | 0(0-Inf)                 |
| DISEASE, HEART, RHEUMATIC, MILD                                     | 1                                       | 8.0333     | 3                                          | 0.7346        | 10.9362(1.0972-109.0093) |
| DISEASE, HEART, RHEUMATIC, NOS                                      | 2                                       | 13.8998    | 85                                         | 20.8138       | 0.6678(0.1639-2.7216)    |
| DISEASE, HEART, SENILE                                              | 0                                       | 0          | 1                                          | 2.4905        | 0(0-Inf)                 |
| DISEASE, HEART, VALVULAR                                            | 11                                      | 143.7029   | 315                                        | 232.9166      | 0.617(0.3379-1.1265)     |
| DISEASE, HEMOLYTIC, NOS                                             | 0                                       | 0          | 1                                          | 0.2354        | 0(0-Inf)                 |
| DISEASE, HEMORRHOIDAL                                               | 1                                       | 9.0676     | 5                                          | 1.2941        | 7.0067(0.7981-61.5111)   |
| DISEASE, HIS-PURKINJE                                               | 1                                       | 12.331     | 18                                         | 12.0258       | 1.0254(0.1363-7.7155)    |
| DISEASE, HODGKIN'S, ABDOMINAL NODES                                 | 0                                       | 0          | 1                                          | 0.234         | 0(0-Inf)                 |
| DISEASE, HODGKIN'S, AXILLA                                          | 0                                       | 0          | 1                                          | 0.2354        | 0(0-Inf)                 |
| DISEASE, HODGKIN'S, CERVICAL                                        | 0                                       | 0          | 1                                          | 0.4048        | 0(0-Inf)                 |
| DISEASE, HODGKIN'S, GROIN                                           | 0                                       | 0          | 1                                          | 0.2729        | 0(0-Inf)                 |
| DISEASE, HODGKIN'S, ILIAC                                           | 0                                       | 0          | 1                                          | 0.2729        | 0(0-Inf)                 |
| DISEASE, HODGKIN'S, IN REMISSION                                    | 0                                       | 0          | 13                                         | 3.4027        | 0(0-Inf)                 |
| DISEASE, HODGKIN'S, INGUINAL                                        | 0                                       | 0          | 2                                          | 0.5457        | 0(0-Inf)                 |
| DISEASE, HODGKIN'S, INTRATHORACIC                                   | 0                                       | 0          | 1                                          | 0.3526        | 0(0-Inf)                 |
| DISEASE, HODGKIN'S, LIVER                                           | 0                                       | 0          | 3                                          | 0.741         | 0(0-Inf)                 |
| DISEASE, HODGKIN'S, LUNG                                            | 0                                       | 0          | 1                                          | 0.4048        | 0(0-Inf)                 |
| DISEASE, HODGKIN'S, MEDIASTINAL                                     | 0                                       | 0          | 2                                          | 0.5458        | 0(0-Inf)                 |
| DISEASE, HODGKIN'S, MESENTERIC                                      | 0                                       | 0          | 2                                          | 0.7896        | 0(0-Inf)                 |
| DISEASE, HODGKIN'S, NECK                                            | 0                                       | 0          | 3                                          | 0.9165        | 0(0-Inf)                 |
| DISEASE, HODGKIN'S, NODULAR SCLEROSING, CODE ALSO BY SITE IF STATED | 0                                       | 0          | 3                                          | 0.7971        | 0(0-Inf)                 |
| DISEASE, HODGKIN'S, NOS                                             | 0                                       | 0          | 17                                         | 6.7442        | 0(0-Inf)                 |
| DISEASE, HODGKIN'S, PELVIS                                          | 0                                       | 0          | 1                                          | 0.2729        | 0(0-Inf)                 |
| DISEASE, HODGKIN'S, RECURRENT                                       | 0                                       | 0          | 5                                          | 1.4133        | 0(0-Inf)                 |
| DISEASE, HODGKIN'S, RETROPERITONEAL                                 | 0                                       | 0          | 1                                          | 0.4751        | 0(0-Inf)                 |
| DISEASE, HODGKIN'S, SPLEEN                                          | 0                                       | 0          | 2                                          | 0.4681        | 0(0-Inf)                 |
| DISEASE, HODGKIN'S, THORAX                                          | 0                                       | 0          | 1                                          | 0.3526        | 0(0-Inf)                 |
| DISEASE, HODGKIN'S, UPPER EXTREMITY                                 | 0                                       | 0          | 1                                          | 0.3526        | 0(0-Inf)                 |

| Description                                                               | No. of Positive Cases with Disease Code | Case Rate* | No. of Positive Controls with Disease Code | Control Rate* | Relative Risk (95%CI)   |
|---------------------------------------------------------------------------|-----------------------------------------|------------|--------------------------------------------|---------------|-------------------------|
| DISEASE, HORN CELL, NOS                                                   | 0                                       | 0          | 3                                          | 1.2105        | 0(0-Inf)                |
| DISEASE, HORN CELL, PROGRESSIVE                                           | 0                                       | 0          | 1                                          | 0.4049        | 0(0-Inf)                |
| DISEASE, HUNTINGTON'S                                                     | 0                                       | 0          | 3                                          | 0.9608        | 0(0-Inf)                |
| DISEASE, HYPERACTIVE, AIRWAY (LUNG)                                       | 1                                       | 7.9752     | 76                                         | 26.4669       | 0.3013(0.0418-2.1701)   |
| DISEASE, HYPERSENSITIVITY, LUNG                                           | 0                                       | 0          | 14                                         | 3.2886        | 0(0-Inf)                |
| DISEASE, HYPERTENSIVE VASCULAR, CODE ALSO HYPERTENSION                    | 0                                       | 0          | 2                                          | 1.1971        | 0(0-Inf)                |
| DISEASE, HYPOPHARYNX                                                      | 0                                       | 0          | 4                                          | 2.9162        | 0(0-Inf)                |
| DISEASE, IATROGENIC                                                       | 2                                       | 15.095     | 32                                         | 10.078        | 1.4978(0.3567-6.2892)   |
| DISEASE, ILIAC                                                            | 0                                       | 0          | 3                                          | 0.9608        | 0(0-Inf)                |
| DISEASE, IMMUNE                                                           | 0                                       | 0          | 4                                          | 1.0714        | 0(0-Inf)                |
| DISEASE, IMMUNE-COMPLEX                                                   | 0                                       | 0          | 2                                          | 0.507         | 0(0-Inf)                |
| DISEASE, INFECTIOUS, NOS                                                  | 0                                       | 0          | 6                                          | 4.8556        | 0(0-Inf)                |
| DISEASE, INFLAMMATORY BOWEL (DYSENTERY#)                                  | 0                                       | 0          | 12                                         | 3.5304        | 0(0-Inf)                |
| DISEASE, INFLAMMATORY BOWEL, NOS                                          | 4                                       | 31.3018    | 57                                         | 19.3751       | 1.6156(0.5836-4.472)    |
| DISEASE, INFLAMMATORY, NOS (VIRAL #)                                      | 2                                       | 14.3671    | 12                                         | 3.3674        | 4.2666(0.939-19.3855)   |
| DISEASE, INFLUENZA-LIKE                                                   | 0                                       | 0          | 27                                         | 12.3184       | 0(0-Inf)                |
| DISEASE, INTESTINE, FUNCTIONAL                                            | 1                                       | 7.8809     | 14                                         | 3.2886        | 2.3964(0.3115-18.438)   |
| DISEASE, INTESTINE, LARGE                                                 | 2                                       | 18.2531    | 57                                         | 24.845        | 0.7347(0.1788-3.0187)   |
| DISEASE, INTESTINE, NOS                                                   | 1                                       | 7.1402     | 9                                          | 2.5242        | 2.8287(0.3528-22.6808)  |
| DISEASE, INTESTINE, SMALL                                                 | 0                                       | 0          | 16                                         | 4.3611        | 0(0-Inf)                |
| DISEASE, IRIS (CILINARY BODY) NEC                                         | 0                                       | 0          | 1                                          | 0.3526        | 0(0-Inf)                |
| DISEASE, IRIS (CILINARY BODY) NOS                                         | 1                                       | 6.9497     | 1                                          | 0.2538        | 27.3862(1.5948-470.277) |
| DISEASE, IRON STORAGE                                                     | 0                                       | 0          | 13                                         | 3.1707        | 0(0-Inf)                |
| DISEASE, JAKOB CREUTZFELDT (VIRAL ENCEPHALITIS#)                          | 0                                       | 0          | 1                                          | 0.4048        | 0(0-Inf)                |
| DISEASE, JAW, NEC                                                         | 0                                       | 0          | 17                                         | 5.6365        | 0(0-Inf)                |
| DISEASE, JOINT, ANKLE, NEC                                                | 0                                       | 0          | 2                                          | 0.4854        | 0(0-Inf)                |
| DISEASE, JOINT, DEGENERATIVE, SACRAL                                      | 6                                       | 47.5712    | 179                                        | 60.9916       | 0.78(0.3451-1.7629)     |
| DISEASE, JOINT, DEGENERATIVE, TEMPOROMANDIBULAR                           | 3                                       | 22.5522    | 61                                         | 18.8955       | 1.1935(0.3728-3.8209)   |
| DISEASE, JOINT, DEGENERATIVE, THORACIC                                    | 13                                      | 93.49      | 181                                        | 49.9848       | 1.8704(1.0622-3.2935)   |
| DISEASE, JOINT, DEGENERATIVE,--SEE ALSO DISEASE, DEGENERATIVE, JOINT--DJD | 140                                     | 1530.303   | 3382                                       | 1637.944      | 0.9343(0.7886-1.1068)   |
| DISEASE, JOINT, FINGER, NEC                                               | 0                                       | 0          | 5                                          | 1.2608        | 0(0-Inf)                |
| DISEASE, JOINT, HIP, NEC                                                  | 0                                       | 0          | 12                                         | 4.7982        | 0(0-Inf)                |
| DISEASE, JOINT, KNEE, NEC                                                 | 2                                       | 13.8857    | 29                                         | 7.2449        | 1.9166(0.4539-8.0934)   |
| DISEASE, JOINT, NEUROPATHIC                                               | 0                                       | 0          | 2                                          | 0.6775        | 0(0-Inf)                |
| DISEASE, JOINT, NOS                                                       | 0                                       | 0          | 12                                         | 2.9156        | 0(0-Inf)                |
| DISEASE, JOINT, SHOULDER, NEC                                             | 0                                       | 0          | 26                                         | 6.3496        | 0(0-Inf)                |
| DISEASE, JOINT, TOE, NEC                                                  | 0                                       | 0          | 2                                          | 0.4681        | 0(0-Inf)                |
| DISEASE, JOINT, WRIST, NEC                                                | 0                                       | 0          | 7                                          | 1.6621        | 0(0-Inf)                |
| DISEASE, KIDNEY, ACUTE                                                    | 0                                       | 0          | 1                                          | 0.8528        | 0(0-Inf)                |

| Description                                                           | No. of Positive Cases with Disease Code | Case Rate* | No. of Positive Controls with Disease Code | Control Rate* | Relative Risk (95%CI)  |
|-----------------------------------------------------------------------|-----------------------------------------|------------|--------------------------------------------|---------------|------------------------|
| DISEASE, KIDNEY, CHRONIC                                              | 2                                       | 25.7579    | 18                                         | 12.7906       | 2.0138(0.4645-8.7309)  |
| DISEASE, KIDNEY, NOS                                                  | 1                                       | 8.0882     | 25                                         | 9.1299        | 0.8859(0.1195-6.569)   |
| DISEASE, KIENBOCK'S, ADULT, SEE ALSO OSTEOCHONDROSIS                  | 0                                       | 0          | 5                                          | 1.2694        | 0(0-Inf)               |
| DISEASE, LABYRINTH, EAR                                               | 2                                       | 13.9199    | 9                                          | 2.325         | 5.987(1.2689-28.2469)  |
| DISEASE, LACRIMAL SYSTEM NEC                                          | 0                                       | 0          | 2                                          | 0.4708        | 0(0-Inf)               |
| DISEASE, LARYNX, NEC                                                  | 0                                       | 0          | 16                                         | 5.7615        | 0(0-Inf)               |
| DISEASE, LEGG-PERTHES                                                 | 0                                       | 0          | 3                                          | 0.9284        | 0(0-Inf)               |
| DISEASE, LEGIONNAIRES'                                                | 0                                       | 0          | 3                                          | 0.9283        | 0(0-Inf)               |
| DISEASE, LEWY-BODY                                                    | 3                                       | 47.6665    | 51                                         | 48.4547       | 0.9837(0.3063-3.1592)  |
| DISEASE, LIGHT-CHAIN                                                  | 0                                       | 0          | 1                                          | 0.3526        | 0(0-Inf)               |
| DISEASE, LITTLE'S                                                     | 0                                       | 0          | 1                                          | 0.398         | 0(0-Inf)               |
| DISEASE, LIVER, ALCOHOL                                               | 2                                       | 14.255     | 61                                         | 15.2757       | 0.9332(0.2275-3.8283)  |
| DISEASE, LIVER, CHOLESTATIC                                           | 0                                       | 0          | 6                                          | 1.492         | 0(0-Inf)               |
| DISEASE, LIVER, CHRONIC ACTIVE                                        | 0                                       | 0          | 11                                         | 2.8721        | 0(0-Inf)               |
| DISEASE, LIVER, CYSTIC                                                | 0                                       | 0          | 2                                          | 0.5069        | 0(0-Inf)               |
| DISEASE, LIVER, DRUG-INDUCED (CODE ALSO EFFECT ADVERSE DRUG)          | 0                                       | 0          | 2                                          | 0.5069        | 0(0-Inf)               |
| DISEASE, LIVER, ETHANOL                                               | 0                                       | 0          | 1                                          | 0.2729        | 0(0-Inf)               |
| DISEASE, LIVER, NOS                                                   | 4                                       | 29.7179    | 73                                         | 22.4117       | 1.326(0.4828-3.6419)   |
| DISEASE, LUMBOSACRAL REGION (JOINT)                                   | 0                                       | 0          | 1                                          | 0.2354        | 0(0-Inf)               |
| DISEASE, LUNG, CHRONIC OBSTRUCTIVE                                    | 5                                       | 49.756     | 116                                        | 57.4608       | 0.8659(0.353-2.1243)   |
| DISEASE, LUNG, HYPERSENSITIVITY                                       | 0                                       | 0          | 14                                         | 3.3144        | 0(0-Inf)               |
| DISEASE, LUNG, RESTRICTIVE                                            | 8                                       | 82.3446    | 142                                        | 73.9092       | 1.1141(0.5454-2.2761)  |
| DISEASE, LYME                                                         | 2                                       | 14.2461    | 28                                         | 8.1099        | 1.7566(0.4159-7.4203)  |
| DISEASE, LYMPHOPROLIFERATIVE, MALIGNANT, CODE ALSO LYMPHOMA SPECIFIED | 0                                       | 0          | 1                                          | 0.8528        | 0(0-Inf)               |
| DISEASE, LYMPHOPROLIFERATIVE, NOS                                     | 8                                       | 66.3834    | 20                                         | 7.4298        | 8.9347(3.8848-20.549)  |
| DISEASE, MACHADO-JOSEPH                                               | 0                                       | 0          | 1                                          | 0.2354        | 0(0-Inf)               |
| DISEASE, MAJOCCHI'S                                                   | 0                                       | 0          | 1                                          | 0.4048        | 0(0-Inf)               |
| DISEASE, MAST CELL                                                    | 0                                       | 0          | 1                                          | 0.8528        | 0(0-Inf)               |
| DISEASE, MENIERE'S                                                    | 3                                       | 22.081     | 89                                         | 26.7585       | 0.8252(0.2604-2.615)   |
| DISEASE, METABOLIC BONE                                               | 2                                       | 14.6836    | 19                                         | 5.6208        | 2.6124(0.6018-11.3403) |
| DISEASE, METABOLIC, NOS                                               | 2                                       | 16.3015    | 46                                         | 16.8379       | 0.9681(0.2341-4.0035)  |
| DISEASE, MIBELLI'S                                                    | 0                                       | 0          | 1                                          | 0.234         | 0(0-Inf)               |
| DISEASE, MITRAL VALVE, CALCIFIC                                       | 0                                       | 0          | 3                                          | 1.2105        | 0(0-Inf)               |
| DISEASE, MITRAL VALVE, NOS                                            | 2                                       | 18.7976    | 60                                         | 27.3701       | 0.6868(0.1674-2.818)   |
| DISEASE, MITRAL VALVE, RHEUMATIC                                      | 0                                       | 0          | 17                                         | 4.5984        | 0(0-Inf)               |
| DISEASE, MITRAL VALVE, RHEUMATIC, CHRONIC                             | 0                                       | 0          | 1                                          | 0.4751        | 0(0-Inf)               |
| DISEASE, MONTGOMERY'S                                                 | 0                                       | 0          | 1                                          | 0.8878        | 0(0-Inf)               |
| DISEASE, MOTOR NEURON                                                 | 0                                       | 0          | 15                                         | 4.8789        | 0(0-Inf)               |

| Description                                                              | No. of Positive Cases with Disease Code | Case Rate* | No. of Positive Controls with Disease Code | Control Rate* | Relative Risk (95%CI)    |
|--------------------------------------------------------------------------|-----------------------------------------|------------|--------------------------------------------|---------------|--------------------------|
| DISEASE, MOTOR NEURON, LOWER                                             | 0                                       | 0          | 6                                          | 2.0358        | 0(0-Inf)                 |
| DISEASE, MOTOR NEURON, UPPER                                             | 1                                       | 11.4907    | 29                                         | 17.6897       | 0.6496(0.0882-4.7847)    |
| DISEASE, MOTOR SYSTEM (FINE MOTOR; VISUAL, COORDINATION, ETC.)           | 0                                       | 0          | 7                                          | 5.6127        | 0(0-Inf)                 |
| DISEASE, MOUTH                                                           | 1                                       | 9.1248     | 23                                         | 5.6814        | 1.6061(0.2153-11.9799)   |
| DISEASE, MOYAMOYA                                                        | 0                                       | 0          | 1                                          | 0.234         | 0(0-Inf)                 |
| DISEASE, MUCHA'S                                                         | 0                                       | 0          | 2                                          | 1.2664        | 0(0-Inf)                 |
| DISEASE, MULTISYSTEM, CHRONIC                                            | 0                                       | 0          | 4                                          | 0.8814        | 0(0-Inf)                 |
| DISEASE, MUSCLE, OCULAR                                                  | 0                                       | 0          | 2                                          | 0.5069        | 0(0-Inf)                 |
| DISEASE, MUSCULOSKELETAL SYSTEM                                          | 0                                       | 0          | 13                                         | 3.1432        | 0(0-Inf)                 |
| DISEASE, MYELOPROLIFERATIVE, NEC                                         | 0                                       | 0          | 11                                         | 9.5865        | 0(0-Inf)                 |
| DISEASE, MYOCARDIAL, NOS                                                 | 0                                       | 0          | 4                                          | 1.1697        | 0(0-Inf)                 |
| DISEASE, NAIL NOS                                                        | 0                                       | 0          | 11                                         | 4.0288        | 0(0-Inf)                 |
| DISEASE, NASAL, NOS                                                      | 0                                       | 0          | 7                                          | 1.6868        | 0(0-Inf)                 |
| DISEASE, NERVE, ARM, NEC                                                 | 0                                       | 0          | 2                                          | 0.4853        | 0(0-Inf)                 |
| DISEASE, NERVE, ULNAR, NEC                                               | 0                                       | 0          | 2                                          | 0.5069        | 0(0-Inf)                 |
| DISEASE, NERVOUS SYSTEM, NEC/NOS                                         | 1                                       | 10.1672    | 7                                          | 3.5852        | 2.8359(0.3441-23.3685)   |
| DISEASE, NEUROMUSCULAR                                                   | 0                                       | 0          | 9                                          | 5.1589        | 0(0-Inf)                 |
| DISEASE, NEUROPATHIC JOINT                                               | 1                                       | 7.0918     | 3                                          | 0.6926        | 10.2398(1.0224-102.5519) |
| DISEASE, NEUROPATHIC, NOS, SEE ALSO NEUROPATHY                           | 0                                       | 0          | 2                                          | 3.0811        | 0(0-Inf)                 |
| DISEASE, NIEMANN-PICK                                                    | 0                                       | 0          | 1                                          | 0.4048        | 0(0-Inf)                 |
| DISEASE, NOSE, NOS                                                       | 1                                       | 7.5239     | 9                                          | 2.8268        | 2.6616(0.3322-21.3242)   |
| DISEASE, OBSTRUCTIVE AIRWAY                                              | 2                                       | 17.3474    | 94                                         | 37.7956       | 0.459(0.1129-1.866)      |
| DISEASE, OBSTRUCTIVE, LUNG                                               | 10                                      | 98.4982    | 211                                        | 102.5214      | 0.9608(0.5086-1.8148)    |
| DISEASE, OBSTRUCTIVE, PERIPHERAL VASCULAR                                | 4                                       | 45.2161    | 44                                         | 26.0448       | 1.7361(0.6213-4.8508)    |
| DISEASE, OCCLUSIVE, ARTERIAL, CODE ALSO OCCLUSION BY SITE SPECIFIED      | 5                                       | 57.6687    | 233                                        | 142.5987      | 0.4044(0.1666-0.9816)    |
| DISEASE, OCCLUSIVE, VASCULAR, SEE ALSO OCCLUSION SITE SPECIFIED          | 0                                       | 0          | 10                                         | 3.9487        | 0(0-Inf)                 |
| DISEASE, OPTIC NERVE/CHIASMAL                                            | 0                                       | 0          | 6                                          | 1.4562        | 0(0-Inf)                 |
| DISEASE, ORBIT                                                           | 0                                       | 0          | 4                                          | 1.841         | 0(0-Inf)                 |
| DISEASE, OROPHARYNX, NEC/NOS                                             | 0                                       | 0          | 3                                          | 1.5107        | 0(0-Inf)                 |
| DISEASE, OSGOOD SCHLATTER                                                | 0                                       | 0          | 2                                          | 0.5458        | 0(0-Inf)                 |
| DISEASE, OSLER WEBER RENDU                                               | 0                                       | 0          | 4                                          | 0.9708        | 0(0-Inf)                 |
| DISEASE, OVARY, CYSTIC                                                   | 0                                       | 0          | 1                                          | 0.2354        | 0(0-Inf)                 |
| DISEASE, OVARY, NOS                                                      | 0                                       | 0          | 15                                         | 6.5511        | 0(0-Inf)                 |
| DISEASE, OVARY, POLYCYSTIC                                               | 0                                       | 0          | 2                                          | 0.4681        | 0(0-Inf)                 |
| DISEASE, PAGET'S, BONE, CODE ALSO OSTEITIS, DEFORMANS FOR SITE SPECIFIED | 1                                       | 9.7436     | 41                                         | 19.7635       | 0.493(0.0676-3.5942)     |
| DISEASE, PAGET'S, BREAST, MALIGNANT                                      | 1                                       | 7.1044     | 3                                          | 0.8191        | 8.6737(0.865-86.9712)    |

| Description                                                                    | No. of Positive Cases with Disease Code | Case Rate* | No. of Positive Controls with Disease Code | Control Rate* | Relative Risk (95%CI)  |
|--------------------------------------------------------------------------------|-----------------------------------------|------------|--------------------------------------------|---------------|------------------------|
| DISEASE, PAGET'S, MALIGNANT, (CELL TYPE), CODE ALSO NEOPLASM MALIGNANT BY SITE | 0                                       | 0          | 3                                          | 1.5409        | 0(0-Inf)               |
| DISEASE, PAGET'S, NIPPLE, MALIGNANT                                            | 0                                       | 0          | 5                                          | 1.1414        | 0(0-Inf)               |
| DISEASE, PAGET'S, NOS (BONE#)                                                  | 2                                       | 21.0453    | 77                                         | 41.6164       | 0.5057(0.124-2.0627)   |
| DISEASE, PAGET'S, SKIN (NOT BREAST), CODE ALSO NEOPLASM MALIGNANT BY SITE      | 1                                       | 11.4385    | 2                                          | 1.2088        | 9.4625(0.8342-107.333) |
| DISEASE, PALATE, HARD                                                          | 0                                       | 0          | 10                                         | 3.2006        | 0(0-Inf)               |
| DISEASE, PALATE, SOFT                                                          | 1                                       | 7.6681     | 36                                         | 11.8366       | 0.6478(0.0885-4.7434)  |
| DISEASE, PALMAR ARCH                                                           | 0                                       | 0          | 1                                          | 0.3526        | 0(0-Inf)               |
| DISEASE, PANCREAS, CYSTIC, NOS                                                 | 0                                       | 0          | 1                                          | 0.3526        | 0(0-Inf)               |
| DISEASE, PANCREAS, NOS                                                         | 6                                       | 69.1405    | 62                                         | 38.1173       | 1.8139(0.7818-4.2086)  |
| DISEASE, PARASITIC, NOS                                                        | 0                                       | 0          | 1                                          | 0.8877        | 0(0-Inf)               |
| DISEASE, PARATHYROID                                                           | 0                                       | 0          | 2                                          | 1.7059        | 0(0-Inf)               |
| DISEASE, PARENCHYMAL, RENAL                                                    | 0                                       | 0          | 1                                          | 0.3526        | 0(0-Inf)               |
| DISEASE, PARKINSON'S                                                           | 14                                      | 181.051    | 341                                        | 245.1713      | 0.7385(0.4323-1.2615)  |
| DISEASE, PAROTID                                                               | 0                                       | 0          | 6                                          | 2.7023        | 0(0-Inf)               |
| DISEASE, PELVIC INFLAMMATORY, FEMALE--PID                                      | 0                                       | 0          | 24                                         | 21.5733       | 0(0-Inf)               |
| DISEASE, PENIS VASCULAR                                                        | 2                                       | 29.2747    | 23                                         | 12.232        | 2.3933(0.5608-10.2129) |
| DISEASE, PERICARDIAL, CONSTRICTIVE                                             | 0                                       | 0          | 1                                          | 0.3526        | 0(0-Inf)               |
| DISEASE, PERIODONTAL, NEC                                                      | 10                                      | 75.1696    | 226                                        | 70.8817       | 1.0605(0.5618-2.0018)  |
| DISEASE, PERTHES                                                               | 0                                       | 0          | 3                                          | 0.8187        | 0(0-Inf)               |
| DISEASE, PEYRONIE'S                                                            | 3                                       | 41.8673    | 141                                        | 75.8655       | 0.5519(0.1756-1.7341)  |
| DISEASE, PHARYNX, NOS                                                          | 0                                       | 0          | 9                                          | 3.759         | 0(0-Inf)               |
| DISEASE, PICK'S (PERICARDIUM)                                                  | 0                                       | 0          | 1                                          | 0.4048        | 0(0-Inf)               |
| DISEASE, PICK'S CEREBRAL ATROPHY                                               | 0                                       | 0          | 3                                          | 0.9608        | 0(0-Inf)               |
| DISEASE, PIGEON BREEDER'S                                                      | 0                                       | 0          | 3                                          | 1.058         | 0(0-Inf)               |
| DISEASE, PILONIDAL                                                             | 1                                       | 13.7325    | 10                                         | 3.66          | 3.752(0.4752-29.6237)  |
| DISEASE, PLUMMER'S                                                             | 1                                       | 7.1978     | 29                                         | 8.1651        | 0.8815(0.1194-6.51)    |
| DISEASE, POLYGLANDULAR                                                         | 0                                       | 0          | 2                                          | 0.4708        | 0(0-Inf)               |
| DISEASE, POST-HERPETIC                                                         | 0                                       | 0          | 1                                          | 0.8534        | 0(0-Inf)               |
| DISEASE, POTT'S                                                                | 0                                       | 0          | 3                                          | 0.7885        | 0(0-Inf)               |
| DISEASE, PREISER'S                                                             | 0                                       | 0          | 1                                          | 0.4048        | 0(0-Inf)               |
| DISEASE, PROSTATE, NOS                                                         | 2                                       | 47.8794    | 22                                         | 28.3217       | 1.6906(0.3958-7.2204)  |
| DISEASE, PSEUDOBULBAR, NEC/NOS                                                 | 0                                       | 0          | 2                                          | 1.8977        | 0(0-Inf)               |
| DISEASE, PSYCHIATRIC, NOS                                                      | 2                                       | 14.5032    | 49                                         | 14.104        | 1.0283(0.249-4.2475)   |
| DISEASE, PULMONARY ARTERY                                                      | 0                                       | 0          | 1                                          | 0.4751        | 0(0-Inf)               |
| DISEASE, PULMONARY, ALLERGIC                                                   | 0                                       | 0          | 4                                          | 1.0353        | 0(0-Inf)               |
| DISEASE, PULMONARY, CHRONIC OBSTRUCTIVE                                        | 90                                      | 733.3869   | 1778                                       | 593.0521      | 1.2366(0.9999-1.5294)  |
| DISEASE, PULMONARY, INDETERMINATE PROCESS                                      | 4                                       | 30.1886    | 25                                         | 7.8681        | 3.8368(1.3221-11.1347) |
| DISEASE, PULMONARY, INFLAMMATORY                                               | 0                                       | 0          | 1                                          | 0.8877        | 0(0-Inf)               |

| Description                                   | No. of Positive Cases with Disease Code | Case Rate* | No. of Positive Controls with Disease Code | Control Rate* | Relative Risk (95%CI)    |
|-----------------------------------------------|-----------------------------------------|------------|--------------------------------------------|---------------|--------------------------|
| DISEASE, PULMONARY, NOS                       | 13                                      | 136.5479   | 197                                        | 104.9688      | 1.3008(0.7407-2.2845)    |
| DISEASE, PULMONARY, VASCULAR                  | 0                                       | 0          | 4                                          | 2.7544        | 0(0-Inf)                 |
| DISEASE, PULSELESS                            | 0                                       | 0          | 1                                          | 0.4048        | 0(0-Inf)                 |
| DISEASE, PYRAMIDAL                            | 2                                       | 15.2533    | 3                                          | 0.7369        | 20.6991(3.3396-128.2942) |
| DISEASE, QUINCKE'S                            | 0                                       | 0          | 1                                          | 0.2354        | 0(0-Inf)                 |
| DISEASE, RAYNAUD'S                            | 3                                       | 21.4522    | 148                                        | 34.024        | 0.6305(0.2006-1.9817)    |
| DISEASE, REACTIVE AIRWAY (LUNG)               | 22                                      | 175.4353   | 729                                        | 253.5433      | 0.6919(0.4523-1.0585)    |
| DISEASE, RECTUM, NEC                          | 2                                       | 21.1039    | 47                                         | 25.4109       | 0.8305(0.2011-3.4298)    |
| DISEASE, RENAL ARTERY                         | 0                                       | 0          | 8                                          | 3.9148        | 0(0-Inf)                 |
| DISEASE, RENAL, HYPERTENSIVE                  | 1                                       | 8.4947     | 13                                         | 5.053         | 1.6811(0.2178-12.975)    |
| DISEASE, RENAL, SEE ALSO NEPHROPATHY          | 9                                       | 99.7295    | 172                                        | 99.2118       | 1.0052(0.5134-1.9681)    |
| DISEASE, RENOVASCULAR                         | 0                                       | 0          | 31                                         | 18.2068       | 0(0-Inf)                 |
| DISEASE, RESPIRATORY, ACUTE                   | 0                                       | 0          | 1                                          | 0.2729        | 0(0-Inf)                 |
| DISEASE, RESPIRATORY, NOS                     | 1                                       | 7.3482     | 10                                         | 3.0118        | 2.4398(0.3081-19.3187)   |
| DISEASE, RESPIRATORY, VIRAL                   | 0                                       | 0          | 9                                          | 2.2479        | 0(0-Inf)                 |
| DISEASE, RETINAL                              | 0                                       | 0          | 12                                         | 4.4558        | 0(0-Inf)                 |
| DISEASE, REVERSIBLE OBSTRUCTIVE AIRWAY (ROAD) | 4                                       | 34.9477    | 48                                         | 19.4761       | 1.7944(0.6436-5.0026)    |
| DISEASE, RHEUMATIC, NOS                       | 1                                       | 7.1502     | 17                                         | 4.7394        | 1.5087(0.1989-11.4435)   |
| DISEASE, SACROILIAC                           | 2                                       | 14.2018    | 29                                         | 7.9412        | 1.7884(0.4236-7.5506)    |
| DISEASE, SALIVARY GLAND OR DUCT, NEC          | 3                                       | 21.459     | 15                                         | 3.5763        | 6.0003(1.7109-21.044)    |
| DISEASE, SCHAMBERG'S                          | 1                                       | 7.0072     | 10                                         | 2.6452        | 2.649(0.3341-21.0052)    |
| DISEASE, SCHEUERMANN'S                        | 0                                       | 0          | 1                                          | 0.234         | 0(0-Inf)                 |
| DISEASE, SCLERA, NEC                          | 0                                       | 0          | 5                                          | 1.526         | 0(0-Inf)                 |
| DISEASE, SILO FILLER'S                        | 0                                       | 0          | 1                                          | 0.2729        | 0(0-Inf)                 |
| DISEASE, SMALL VESSEL (ARTERIAL/VASCULAR)     | 0                                       | 0          | 22                                         | 13.2682       | 0(0-Inf)                 |
| DISEASE, SMALL VESSEL (CEREBROVASCULAR)       | 1                                       | 12.0812    | 55                                         | 36.1946       | 0.3338(0.0461-2.4163)    |
| DISEASE, SOBOE'S (SOBUE'S)                    | 0                                       | 0          | 2                                          | 0.7053        | 0(0-Inf)                 |
| DISEASE, SPINAL CORD                          | 1                                       | 7.7341     | 8                                          | 1.8681        | 4.1401(0.508-33.7396)    |
| DISEASE, SPINAL CORD, DEGENERATIVE            | 0                                       | 0          | 2                                          | 0.432         | 0(0-Inf)                 |
| DISEASE, SPINE (JOINT), NEC                   | 0                                       | 0          | 19                                         | 6.2278        | 0(0-Inf)                 |
| DISEASE, SPINE, HYPERTROPHIC, NEC             | 0                                       | 0          | 3                                          | 0.9608        | 0(0-Inf)                 |
| DISEASE, STARGARDT'S                          | 0                                       | 0          | 2                                          | 0.9503        | 0(0-Inf)                 |
| DISEASE, STILL'S                              | 1                                       | 9.9282     | 1                                          | 0.4941        | 20.093(1.2009-336.1828)  |
| DISEASE, STILL'S, ADULT                       | 1                                       | 7.6979     | 1                                          | 0.3294        | 23.3724(1.3842-394.638)  |
| DISEASE, STOMACH, NOS                         | 1                                       | 7.912      | 46                                         | 15.799        | 0.5008(0.0688-3.6429)    |
| DISEASE, STONE, SEE ALSO CALCULUS, URINARY    | 0                                       | 0          | 15                                         | 4.8294        | 0(0-Inf)                 |
| DISEASE, STRIATOPERONEAL                      | 0                                       | 0          | 1                                          | 0.234         | 0(0-Inf)                 |
| DISEASE, SYSTEMIC                             | 2                                       | 19.054     | 18                                         | 8.3646        | 2.2779(0.5242-9.899)     |
| DISEASE, TEETH, NEC                           | 2                                       | 14.2506    | 27                                         | 7.5499        | 1.8875(0.4455-7.997)     |
| DISEASE, THROMBOEMBOLIC                       | 1                                       | 9.1995     | 20                                         | 8.8469        | 1.0399(0.1388-7.7914)    |

| Description                                                      | No. of Positive Cases with Disease Code | Case Rate* | No. of Positive Controls with Disease Code | Control Rate* | Relative Risk (95%CI)  |
|------------------------------------------------------------------|-----------------------------------------|------------|--------------------------------------------|---------------|------------------------|
| DISEASE, THROMBOEMBOLIC, VENOUS                                  | 1                                       | 9.0172     | 19                                         | 8.1493        | 1.1065(0.1472-8.315)   |
| DISEASE, THYGESON                                                | 0                                       | 0          | 1                                          | 0.4048        | 0(0-Inf)               |
| DISEASE, THYROID, AUTOIMMUNE                                     | 0                                       | 0          | 11                                         | 2.8613        | 0(0-Inf)               |
| DISEASE, THYROID, NEC                                            | 1                                       | 8.0521     | 73                                         | 25.9543       | 0.3102(0.043-2.2369)   |
| DISEASE, TONGUE                                                  | 2                                       | 14.0935    | 45                                         | 10.4891       | 1.3436(0.3242-5.5689)  |
| DISEASE, TOOTH, HARD TISSUE, NEC                                 | 0                                       | 0          | 12                                         | 2.8573        | 0(0-Inf)               |
| DISEASE, TOOTH, NOS                                              | 2                                       | 16.0807    | 41                                         | 14.4935       | 1.1095(0.2671-4.6086)  |
| DISEASE, TOOTH, PULP, NEC                                        | 0                                       | 0          | 11                                         | 2.5269        | 0(0-Inf)               |
| DISEASE, TRACHEA, NEC                                            | 0                                       | 0          | 6                                          | 1.8809        | 0(0-Inf)               |
| DISEASE, TRACHEA, NOS                                            | 0                                       | 0          | 6                                          | 3.1079        | 0(0-Inf)               |
| DISEASE, UMBILICUS, NEC                                          | 0                                       | 0          | 1                                          | 0.4048        | 0(0-Inf)               |
| DISEASE, UPPER RESPIRATORY, ACUTE                                | 0                                       | 0          | 2                                          | 0.5709        | 0(0-Inf)               |
| DISEASE, UPPER RESPIRATORY, NOS                                  | 1                                       | 7.2798     | 10                                         | 2.9793        | 2.4435(0.3087-19.3392) |
| DISEASE, UPPER RESPIRATORY, VIRAL                                | 0                                       | 0          | 2                                          | 0.7896        | 0(0-Inf)               |
| DISEASE, URETER                                                  | 0                                       | 0          | 25                                         | 14.2235       | 0(0-Inf)               |
| DISEASE, URETHRA                                                 | 3                                       | 21.515     | 238                                        | 55.4842       | 0.3878(0.124-1.2125)   |
| DISEASE, URINARY                                                 | 0                                       | 0          | 4                                          | 1.9297        | 0(0-Inf)               |
| DISEASE, VALVULAR, RHEUMATIC, SEE ALSO DISEASE, HEART, RHEUMATIC | 0                                       | 0          | 28                                         | 6.7519        | 0(0-Inf)               |
| DISEASE, VASCULAR, ISCHEMIC, PERIPHERAL                          | 0                                       | 0          | 2                                          | 1.1971        | 0(0-Inf)               |
| DISEASE, VASCULAR, NOS                                           | 9                                       | 90.2073    | 148                                        | 73.8504       | 1.2215(0.6219-2.3991)  |
| DISEASE, VASCULAR, PERIPHERAL(SMALL VESSEL)                      | 27                                      | 316.3604   | 615                                        | 379.773       | 0.833(0.5662-1.2257)   |
| DISEASE, VASCULAR, RENAL ARTERY                                  | 0                                       | 0          | 2                                          | 0.432         | 0(0-Inf)               |
| DISEASE, VASOMOTOR                                               | 0                                       | 0          | 2                                          | 0.4854        | 0(0-Inf)               |
| DISEASE, VASOSPASTIC                                             | 1                                       | 7.2127     | 7                                          | 1.9829        | 3.6375(0.4381-30.2019) |
| DISEASE, VESTIBULAR SYSTEM                                       | 1                                       | 7.7158     | 87                                         | 28.6704       | 0.2691(0.0374-1.9354)  |
| DISEASE, VIRAL, NOS--VILL                                        | 65                                      | 511.751    | 1661                                       | 412.1287      | 1.2417(0.9684-1.5922)  |
| DISEASE, VITREOUS                                                | 0                                       | 0          | 3                                          | 1.0579        | 0(0-Inf)               |
| DISEASE, VOCAL CORD, NEC                                         | 0                                       | 0          | 1                                          | 0.2354        | 0(0-Inf)               |
| DISEASE, VOCAL CORD, NOS                                         | 4                                       | 30.4576    | 46                                         | 14.9435       | 2.0382(0.7298-5.6926)  |
| DISEASE, VON HIPPEL-LINDAU                                       | 0                                       | 0          | 1                                          | 0.2729        | 0(0-Inf)               |
| DISEASE, VON RECKLINGHAUSEN'S, NOS                               | 0                                       | 0          | 2                                          | 1.8647        | 0(0-Inf)               |
| DISEASE, VON WILLEBRAND'S                                        | 0                                       | 0          | 2                                          | 0.5069        | 0(0-Inf)               |
| DISEASE, WELL'S                                                  | 0                                       | 0          | 1                                          | 0.398         | 0(0-Inf)               |
| DISEASE, WHITE MATTER                                            | 2                                       | 22.2321    | 22                                         | 12.8459       | 1.7307(0.4044-7.406)   |
| DISEASE, ZOONOTIC BACTERIAL, NEC                                 | 0                                       | 0          | 1                                          | 0.398         | 0(0-Inf)               |
| DISLOCATION, ACROMIOCLAVICULAR                                   | 1                                       | 6.9335     | 24                                         | 6.353         | 1.0914(0.1469-8.1056)  |
| DISLOCATION, ACROMIOCLAVICULAR, LATE EFFECT                      | 0                                       | 0          | 1                                          | 0.8897        | 0(0-Inf)               |
| DISLOCATION, ANKLE                                               | 1                                       | 6.9154     | 3                                          | 0.7976        | 8.6699(0.8752-85.8831) |
| DISLOCATION, ANKLE, OLD                                          | 0                                       | 0          | 2                                          | 0.5069        | 0(0-Inf)               |



| Description                                          | No. of Positive Cases with Disease Code | Case Rate* | No. of Positive Controls with Disease Code | Control Rate* | Relative Risk (95%CI)    |
|------------------------------------------------------|-----------------------------------------|------------|--------------------------------------------|---------------|--------------------------|
| DISLOCATION, ANKLE, OPEN                             | 0                                       | 0          | 1                                          | 0.2729        | 0(0-Inf)                 |
| DISLOCATION, ANTERIOR, CODE ALSO BY SITE             | 3                                       | 22.3989    | 24                                         | 7.2742        | 3.0792(0.918-10.3281)    |
| DISLOCATION, ATLANTOAXIAL                            | 0                                       | 0          | 4                                          | 1.1817        | 0(0-Inf)                 |
| DISLOCATION, ATLAS                                   | 0                                       | 0          | 1                                          | 0.4048        | 0(0-Inf)                 |
| DISLOCATION, CARPAL                                  | 1                                       | 7.3308     | 2                                          | 0.6444        | 11.3763(1.0026-129.0793) |
| DISLOCATION, CARPAL, LATE EFFECT                     | 1                                       | 6.8878     | 0                                          | 0             | 12234312128.0795(0-Inf)  |
| DISLOCATION, CARPOMETACARPAL                         | 1                                       | 7.8114     | 7                                          | 1.701         | 4.5924(0.554-38.0684)    |
| DISLOCATION, CARPOMETACARPAL, LATE EFFECT            | 0                                       | 0          | 1                                          | 0.398         | 0(0-Inf)                 |
| DISLOCATION, CERVICAL SPINE                          | 1                                       | 7.6413     | 27                                         | 8.6854        | 0.8798(0.1189-6.5117)    |
| DISLOCATION, CERVICAL SPINE, LATE EFFECT             | 1                                       | 10.1243    | 0                                          | 0             | 14227101962.3189(0-Inf)  |
| DISLOCATION, CHONDROCOSTAL                           | 1                                       | 7.2174     | 8                                          | 1.9455        | 3.7098(0.4562-30.1703)   |
| DISLOCATION, COCCYX                                  | 0                                       | 0          | 1                                          | 0.2729        | 0(0-Inf)                 |
| DISLOCATION, CRUCIATE LIGAMENT, KNEE, OLD            | 0                                       | 0          | 2                                          | 0.7055        | 0(0-Inf)                 |
| DISLOCATION, ELBOW                                   | 0                                       | 0          | 21                                         | 5.0037        | 0(0-Inf)                 |
| DISLOCATION, ELBOW, LATE EFFECT                      | 0                                       | 0          | 1                                          | 0.4048        | 0(0-Inf)                 |
| DISLOCATION, ELBOW, OLD                              | 0                                       | 0          | 3                                          | 0.7461        | 0(0-Inf)                 |
| DISLOCATION, ELBOW, OPEN                             | 0                                       | 0          | 1                                          | 0.4048        | 0(0-Inf)                 |
| DISLOCATION, FEMUR, DISTAL                           | 0                                       | 0          | 1                                          | 6.4832        | 0(0-Inf)                 |
| DISLOCATION, FEMUR, PROXIMAL                         | 0                                       | 0          | 1                                          | 0.2729        | 0(0-Inf)                 |
| DISLOCATION, FIBULA, PROXIMAL                        | 0                                       | 0          | 1                                          | 0.2354        | 0(0-Inf)                 |
| DISLOCATION, FINGER                                  | 2                                       | 13.8931    | 38                                         | 9.5509        | 1.4546(0.349-6.0632)     |
| DISLOCATION, FINGER, LATE EFFECT                     | 0                                       | 0          | 1                                          | 0.4751        | 0(0-Inf)                 |
| DISLOCATION, FINGER, OPEN                            | 0                                       | 0          | 1                                          | 0.2729        | 0(0-Inf)                 |
| DISLOCATION, FINGER, RECURRENT                       | 0                                       | 0          | 2                                          | 0.7896        | 0(0-Inf)                 |
| DISLOCATION, FOOT, OPEN                              | 0                                       | 0          | 1                                          | 0.2729        | 0(0-Inf)                 |
| DISLOCATION, FOOT, RECURRENT                         | 1                                       | 6.9368     | 39                                         | 9.6735        | 0.7171(0.0981-5.2433)    |
| DISLOCATION, GLENOID, SEE ALSO DISLOCATION, SHOULDER | 0                                       | 0          | 1                                          | 0.2354        | 0(0-Inf)                 |
| DISLOCATION, HAND, RECURRENT                         | 0                                       | 0          | 4                                          | 0.8839        | 0(0-Inf)                 |
| DISLOCATION, HIP                                     | 1                                       | 9.1296     | 14                                         | 6.1072        | 1.4949(0.1949-11.4683)   |
| DISLOCATION, HIP, CHRONIC                            | 0                                       | 0          | 2                                          | 0.4853        | 0(0-Inf)                 |
| DISLOCATION, HIP, CONGENITAL                         | 1                                       | 7.7398     | 10                                         | 2.4005        | 3.2242(0.4066-25.5652)   |
| DISLOCATION, HIP, LATE EFFECT                        | 0                                       | 0          | 1                                          | 0.398         | 0(0-Inf)                 |
| DISLOCATION, HIP, OLD                                | 0                                       | 0          | 2                                          | 0.4853        | 0(0-Inf)                 |
| DISLOCATION, HIP, PROSTHESIS                         | 0                                       | 0          | 11                                         | 4.1779        | 0(0-Inf)                 |
| DISLOCATION, HIP, PROSTHESIS, LATE EFFECT            | 0                                       | 0          | 1                                          | 0.4048        | 0(0-Inf)                 |
| DISLOCATION, HIP, PROSTHESIS, NON TRAUMATIC, (NOS)   | 1                                       | 9.107      | 37                                         | 16.0711       | 0.5667(0.0775-4.1447)    |
| DISLOCATION, HIP, RECURRENT                          | 1                                       | 13.3377    | 5                                          | 3.8411        | 3.4723(0.3999-30.1526)   |
| DISLOCATION, HUMERUS, HEAD                           | 0                                       | 0          | 13                                         | 9.9279        | 0(0-Inf)                 |
| DISLOCATION, HUMERUS, PROXIMAL                       | 0                                       | 0          | 5                                          | 2.2763        | 0(0-Inf)                 |
| DISLOCATION, INCUS                                   | 0                                       | 0          | 1                                          | 0.8273        | 0(0-Inf)                 |

| Description                                                   | No. of Positive Cases with Disease Code | Case Rate* | No. of Positive Controls with Disease Code | Control Rate* | Relative Risk (95%CI)    |
|---------------------------------------------------------------|-----------------------------------------|------------|--------------------------------------------|---------------|--------------------------|
| DISLOCATION, INTERPHALANGEAL JOINT, FOOT                      | 0                                       | 0          | 5                                          | 1.4283        | 0(0-Inf)                 |
| DISLOCATION, INTERPHALANGEAL JOINT, HAND                      | 2                                       | 14.6449    | 46                                         | 11.2199       | 1.3053(0.3154-5.4017)    |
| DISLOCATION, INTERPHALANGEAL JOINT, HAND, LATE EFFECT         | 0                                       | 0          | 1                                          | 0.234         | 0(0-Inf)                 |
| DISLOCATION, INTERPHALANGEAL JOINT, HAND, OPEN                | 1                                       | 6.9135     | 8                                          | 2.0684        | 3.3425(0.4118-27.1305)   |
| DISLOCATION, KNEE                                             | 0                                       | 0          | 5                                          | 1.3793        | 0(0-Inf)                 |
| DISLOCATION, KNEE, LATE EFFECT                                | 0                                       | 0          | 1                                          | 0.234         | 0(0-Inf)                 |
| DISLOCATION, KNEE, OLD                                        | 0                                       | 0          | 23                                         | 5.7737        | 0(0-Inf)                 |
| DISLOCATION, KNEE, PROSTHESIS                                 | 0                                       | 0          | 1                                          | 0.2354        | 0(0-Inf)                 |
| DISLOCATION, LATERAL, CODE ALSO BY SITE                       | 0                                       | 0          | 3                                          | 0.8115        | 0(0-Inf)                 |
| DISLOCATION, LENS                                             | 1                                       | 13.9253    | 7                                          | 5.677         | 2.4529(0.2987-20.1438)   |
| DISLOCATION, LENS POSTERIOR                                   | 0                                       | 0          | 1                                          | 0.8535        | 0(0-Inf)                 |
| DISLOCATION, LUMBAR SPINE                                     | 2                                       | 14.9902    | 20                                         | 6.1395        | 2.4416(0.5649-10.5525)   |
| DISLOCATION, MENISCUS, KNEE                                   | 0                                       | 0          | 6                                          | 1.444         | 0(0-Inf)                 |
| DISLOCATION, MENISCUS, KNEE, OLD                              | 0                                       | 0          | 7                                          | 2.0187        | 0(0-Inf)                 |
| DISLOCATION, MENISCUS, KNEE, RECURRENT                        | 0                                       | 0          | 1                                          | 0.2354        | 0(0-Inf)                 |
| DISLOCATION, METACARPAL, DISTAL                               | 0                                       | 0          | 1                                          | 0.2729        | 0(0-Inf)                 |
| DISLOCATION, METACARPAL, PROXIMAL                             | 0                                       | 0          | 1                                          | 0.398         | 0(0-Inf)                 |
| DISLOCATION, METACARPAL, RECURRENT                            | 0                                       | 0          | 1                                          | 0.234         | 0(0-Inf)                 |
| DISLOCATION, METACARPOPHALANGEAL                              | 2                                       | 13.9675    | 24                                         | 6.306         | 2.2149(0.5189-9.4546)    |
| DISLOCATION, METATARSAL                                       | 0                                       | 0          | 1                                          | 0.8877        | 0(0-Inf)                 |
| DISLOCATION, METATARSOPHALANGEAL                              | 3                                       | 20.8733    | 43                                         | 10.5847       | 1.972(0.6076-6.4005)     |
| DISLOCATION, METATARSOPHALANGEAL, LATE EFFECT                 | 0                                       | 0          | 1                                          | 0.2354        | 0(0-Inf)                 |
| DISLOCATION, NAVICULAR                                        | 0                                       | 0          | 1                                          | 0.8542        | 0(0-Inf)                 |
| DISLOCATION, NAVICULAR, OPEN                                  | 0                                       | 0          | 1                                          | 0.2729        | 0(0-Inf)                 |
| DISLOCATION, NERVE, SEE ALSO SLIPPED OR DISEASE NERVE BY SITE | 0                                       | 0          | 2                                          | 0.4708        | 0(0-Inf)                 |
| DISLOCATION, ODONTOID                                         | 1                                       | 7.0367     | 1                                          | 0.265         | 26.5573(1.5981-441.3256) |
| DISLOCATION, PATELLA                                          | 0                                       | 0          | 37                                         | 11.9962       | 0(0-Inf)                 |
| DISLOCATION, PATELLA, LATE EFFECT                             | 0                                       | 0          | 1                                          | 0.234         | 0(0-Inf)                 |
| DISLOCATION, PATELLA, OLD/RECURRENT                           | 0                                       | 0          | 22                                         | 5.2555        | 0(0-Inf)                 |
| DISLOCATION, PELVIS (PUBIC)                                   | 0                                       | 0          | 4                                          | 1.112         | 0(0-Inf)                 |
| DISLOCATION, POSTERIOR, CODE ALSO BY SITE                     | 0                                       | 0          | 9                                          | 2.5739        | 0(0-Inf)                 |
| DISLOCATION, RADIOCARPAL                                      | 0                                       | 0          | 1                                          | 0.234         | 0(0-Inf)                 |
| DISLOCATION, RADIO-ULNAR, DISTAL                              | 1                                       | 8.9316     | 7                                          | 1.802         | 4.9564(0.5982-41.0654)   |
| DISLOCATION, RADIUS, HEAD OF                                  | 0                                       | 0          | 2                                          | 2.9785        | 0(0-Inf)                 |
| DISLOCATION, RADIUS, PROXIMAL (ELBOW#)                        | 0                                       | 0          | 2                                          | 0.4854        | 0(0-Inf)                 |
| DISLOCATION, SACROILIAC JOINT                                 | 0                                       | 0          | 3                                          | 1.058         | 0(0-Inf)                 |
| DISLOCATION, SCAPHOID, WRIST                                  | 0                                       | 0          | 13                                         | 3.4156        | 0(0-Inf)                 |
| DISLOCATION, SCAPHOID, WRIST, LATE EFFECT                     | 0                                       | 0          | 1                                          | 0.2729        | 0(0-Inf)                 |
| DISLOCATION, SCAPHOID, WRIST, RECURRENT                       | 0                                       | 0          | 4                                          | 1.0528        | 0(0-Inf)                 |

| Description                                                      | No. of Positive Cases with Disease Code | Case Rate* | No. of Positive Controls with Disease Code | Control Rate* | Relative Risk (95%CI)   |
|------------------------------------------------------------------|-----------------------------------------|------------|--------------------------------------------|---------------|-------------------------|
| DISLOCATION, SEPTUM                                              | 0                                       | 0          | 1                                          | 0.234         | 0(0-Inf)                |
| DISLOCATION, SHOULDER                                            | 4                                       | 29.8538    | 121                                        | 37.1975       | 0.8026(0.2957-2.1784)   |
| DISLOCATION, SHOULDER, CHRONIC                                   | 1                                       | 14.2527    | 4                                          | 3.4855        | 4.0891(0.4501-37.1529)  |
| DISLOCATION, SHOULDER, LATE EFFECT                               | 0                                       | 0          | 12                                         | 3.0162        | 0(0-Inf)                |
| DISLOCATION, SHOULDER, OLD                                       | 1                                       | 7.7458     | 31                                         | 10.2871       | 0.753(0.1023-5.5415)    |
| DISLOCATION, SHOULDER, PROSTHESIS                                | 0                                       | 0          | 1                                          | 0.4048        | 0(0-Inf)                |
| DISLOCATION, SHOULDER, PROSTHESIS, NON TRAUMATIC                 | 0                                       | 0          | 3                                          | 1.5396        | 0(0-Inf)                |
| DISLOCATION, SHOULDER, RECURRENT                                 | 1                                       | 8.4055     | 17                                         | 4.1423        | 2.0292(0.2675-15.3929)  |
| DISLOCATION, SPINE, LATE EFFECT                                  | 0                                       | 0          | 1                                          | 0.2729        | 0(0-Inf)                |
| DISLOCATION, SPINE, NOS                                          | 0                                       | 0          | 1                                          | 0.2354        | 0(0-Inf)                |
| DISLOCATION, SPINE, OLD                                          | 0                                       | 0          | 26                                         | 7.3982        | 0(0-Inf)                |
| DISLOCATION, STERNOCLAVICULAR                                    | 0                                       | 0          | 8                                          | 1.9759        | 0(0-Inf)                |
| DISLOCATION, STERNOCLAVICULAR, OLD                               | 0                                       | 0          | 1                                          | 0.2354        | 0(0-Inf)                |
| DISLOCATION, TALUS                                               | 0                                       | 0          | 4                                          | 1.3225        | 0(0-Inf)                |
| DISLOCATION, TALUS, OPEN                                         | 0                                       | 0          | 1                                          | 0.2729        | 0(0-Inf)                |
| DISLOCATION, TEMPOROMANDIBULAR (TRAUMATIC #)                     | 0                                       | 0          | 9                                          | 2.5134        | 0(0-Inf)                |
| DISLOCATION, TEMPOROMANDIBULAR, LATE EFFECT                      | 0                                       | 0          | 1                                          | 0.2354        | 0(0-Inf)                |
| DISLOCATION, TEMPOROMANDIBULAR, NOS (INCLUDES RECURRENT/CHRONIC) | 0                                       | 0          | 13                                         | 3.1155        | 0(0-Inf)                |
| DISLOCATION, TENDON, NON TRAUMATIC, SEE ALSO SLIPPED             | 0                                       | 0          | 13                                         | 4.9703        | 0(0-Inf)                |
| DISLOCATION, THORACIC SPINE                                      | 0                                       | 0          | 1                                          | 0.3526        | 0(0-Inf)                |
| DISLOCATION, THUMB                                               | 0                                       | 0          | 6                                          | 1.8334        | 0(0-Inf)                |
| DISLOCATION, THUMB, LATE EFFECT                                  | 0                                       | 0          | 2                                          | 0.5069        | 0(0-Inf)                |
| DISLOCATION, THUMB, OLD                                          | 0                                       | 0          | 4                                          | 1.6251        | 0(0-Inf)                |
| DISLOCATION, THUMB, OPEN                                         | 1                                       | 22.27      | 0                                          | 0             | 137946922774.936(0-Inf) |
| DISLOCATION, THUMB, PROSTHESIS                                   | 0                                       | 0          | 1                                          | 0.2354        | 0(0-Inf)                |
| DISLOCATION, THUMB, RECURRENT                                    | 0                                       | 0          | 1                                          | 0.3526        | 0(0-Inf)                |
| DISLOCATION, TIBIA, DISTAL                                       | 0                                       | 0          | 1                                          | 0.8271        | 0(0-Inf)                |
| DISLOCATION, TOE                                                 | 1                                       | 7.0749     | 13                                         | 2.9525        | 2.3962(0.3092-18.5701)  |
| DISLOCATION, ULNA, DISTAL                                        | 1                                       | 7.5782     | 3                                          | 0.6839        | 11.0805(1.1068-110.927) |
| DISLOCATION, ULNA, DISTAL, LATE EFFECT                           | 0                                       | 0          | 1                                          | 0.2354        | 0(0-Inf)                |
| DISLOCATION, VERTEBRA, CERVICAL                                  | 1                                       | 6.971      | 9                                          | 2.1809        | 3.1963(0.3983-25.6527)  |
| DISLOCATION, VERTEBRA, LUMBAR                                    | 0                                       | 0          | 12                                         | 3.6842        | 0(0-Inf)                |
| DISLOCATION, VERTEBRA, LUMBAR, LATE EFFECT                       | 0                                       | 0          | 1                                          | 0.2354        | 0(0-Inf)                |
| DISLOCATION, WRIST                                               | 0                                       | 0          | 6                                          | 2.4612        | 0(0-Inf)                |
| DISLOCATION, WRIST, LATE EFFECT                                  | 0                                       | 0          | 1                                          | 0.3526        | 0(0-Inf)                |
| DISLOCATION, WRIST, OLD (RECURRENT)                              | 2                                       | 14.4178    | 1                                          | 0.2467        | 58.452(5.0812-672.4052) |
| DISMISSAL HOSPITAL                                               | 343                                     | 4450.135   | 8283                                       | 5535.2474     | 0.804(0.7214-0.8959)    |
| DISORDER, AFFECTIVE, BIPOLAR, SEE ALSO DISEASE                   | 2                                       | 14.2587    | 55                                         | 15.6803       | 0.9093(0.221-3.7415)    |
| DISORDER, AFFECTIVE, NEC                                         | 2                                       | 14.0237    | 38                                         | 10.3299       | 1.3576(0.3258-5.6571)   |

| Description                                 | No. of Positive Cases with Disease Code | Case Rate* | No. of Positive Controls with Disease Code | Control Rate* | Relative Risk (95%CI)    |
|---------------------------------------------|-----------------------------------------|------------|--------------------------------------------|---------------|--------------------------|
| DISORDER, AFFECTIVE, NOS                    | 7                                       | 50.9959    | 110                                        | 31.9126       | 1.598(0.7416-3.4433)     |
| DISORDER, AFFECTIVE, SEASONAL (SAD)         | 0                                       | 0          | 36                                         | 10.0352       | 0(0-Inf)                 |
| DISORDER, ATTENTION DEFICIT--ADD            | 1                                       | 7.3383     | 12                                         | 3.6705        | 1.9993(0.2572-15.5381)   |
| DISORDER, BINOCULAR VISION NOS              | 0                                       | 0          | 3                                          | 1.2106        | 0(0-Inf)                 |
| DISORDER, BLEEDING                          | 0                                       | 0          | 2                                          | 1.8979        | 0(0-Inf)                 |
| DISORDER, BOWEL, FUNCTIONAL                 | 2                                       | 17.6295    | 24                                         | 9.8894        | 1.7827(0.4184-7.5961)    |
| DISORDER, CARBOHYDRATE METABOLISM           | 0                                       | 0          | 4                                          | 0.9159        | 0(0-Inf)                 |
| DISORDER, CHOREIFORM MOVEMENT               | 0                                       | 0          | 2                                          | 1.1615        | 0(0-Inf)                 |
| DISORDER, CHOROID, NEC                      | 0                                       | 0          | 3                                          | 0.8018        | 0(0-Inf)                 |
| DISORDER, COGNITIVE                         | 84                                      | 1303.941   | 1320                                       | 1153.9708     | 1.13(0.9059-1.4094)      |
| DISORDER, COMPREHENSION                     | 0                                       | 0          | 1                                          | 0.2729        | 0(0-Inf)                 |
| DISORDER, CONJUNCTIVAL NEC                  | 0                                       | 0          | 2                                          | 0.5458        | 0(0-Inf)                 |
| DISORDER, CONNECTIVE TISSUE                 | 0                                       | 0          | 13                                         | 2.9715        | 0(0-Inf)                 |
| DISORDER, CONSCIOUSNESS, CAUSE SPECIFIED    | 1                                       | 9.1939     | 18                                         | 7.926         | 1.16(0.1538-8.7457)      |
| DISORDER, CONSCIOUSNESS, NOS                | 8                                       | 108.9664   | 156                                        | 121.6171      | 0.896(0.4396-1.826)      |
| DISORDER, CONVULSIVE, NOS                   | 4                                       | 38.309     | 58                                         | 15.1272       | 2.5325(0.9146-7.012)     |
| DISORDER, COORDINATION                      | 1                                       | 10.6911    | 5                                          | 2.7499        | 3.8878(0.447-33.8156)    |
| DISORDER, CORNEA NEC                        | 0                                       | 0          | 11                                         | 3.3646        | 0(0-Inf)                 |
| DISORDER, CORNEA NOS                        | 0                                       | 0          | 7                                          | 1.7405        | 0(0-Inf)                 |
| DISORDER, DENTITION                         | 1                                       | 9.8373     | 40                                         | 19.5231       | 0.5039(0.0691-3.676)     |
| DISORDER, DYSTHYMIC                         | 12                                      | 86.8505    | 412                                        | 118.4271      | 0.7334(0.4125-1.3037)    |
| DISORDER, EXCESSIVE SOMNOLENCE              | 3                                       | 21.179     | 97                                         | 27.0824       | 0.782(0.2472-2.4735)     |
| DISORDER, EYE, NEC                          | 1                                       | 7.0859     | 13                                         | 3.5599        | 1.9905(0.2574-15.3943)   |
| DISORDER, EYELID, NEC                       | 1                                       | 8.2179     | 10                                         | 3.6712        | 2.2385(0.2828-17.7203)   |
| DISORDER, EYELID, NOS                       | 0                                       | 0          | 7                                          | 2.7297        | 0(0-Inf)                 |
| DISORDER, GASTROINTESTINAL (FUNCTIONAL)     | 0                                       | 0          | 6                                          | 2.1725        | 0(0-Inf)                 |
| DISORDER, HEMATOLOGIC                       | 0                                       | 0          | 4                                          | 4.7814        | 0(0-Inf)                 |
| DISORDER, INTESTINE, FUNCTIONAL             | 0                                       | 0          | 35                                         | 8.3781        | 0(0-Inf)                 |
| DISORDER, LANGUAGE (TYPE UNDETERMINED)      | 0                                       | 0          | 30                                         | 10.4541       | 0(0-Inf)                 |
| DISORDER, LENS, NEC                         | 0                                       | 0          | 1                                          | 0.8881        | 0(0-Inf)                 |
| DISORDER, LEVATOR PALPEBRAE, NEC            | 0                                       | 0          | 5                                          | 1.7713        | 0(0-Inf)                 |
| DISORDER, LIPID (METABOLISM), NOS           | 0                                       | 0          | 67                                         | 16.8013       | 0(0-Inf)                 |
| DISORDER, LYMPHOPROLIFERATIVE B-CELL        | 6                                       | 63.6218    | 13                                         | 7.0598        | 9.0119(3.3829-24.007)    |
| DISORDER, LYMPHOPROLIFERATIVE T-HELPER CELL | 0                                       | 0          | 1                                          | 0.4048        | 0(0-Inf)                 |
| DISORDER, MENSTRUAL                         | 1                                       | 15.6403    | 3                                          | 0.9251        | 16.9074(1.7153-166.6527) |
| DISORDER, MENTAL, DRUG-INDUCED, NEC         | 0                                       | 0          | 1                                          | 0.2729        | 0(0-Inf)                 |
| DISORDER, MENTAL, DRUG-INDUCED, NOS         | 0                                       | 0          | 1                                          | 0.3526        | 0(0-Inf)                 |
| DISORDER, MENTAL, NOS                       | 0                                       | 0          | 14                                         | 6.9613        | 0(0-Inf)                 |
| DISORDER, MENTAL, ORGANIC SEE ALSO SYNDROME | 1                                       | 9.8351     | 13                                         | 6.351         | 1.5486(0.2009-11.9392)   |
| DISORDER, METABOLISM, NOS                   | 1                                       | 7.5182     | 5                                          | 1.6094        | 4.6715(0.5346-40.8226)   |

| Description                                                  | No. of Positive Cases with Disease Code | Case Rate* | No. of Positive Controls with Disease Code | Control Rate* | Relative Risk (95%CI)    |
|--------------------------------------------------------------|-----------------------------------------|------------|--------------------------------------------|---------------|--------------------------|
| DISORDER, MOOD                                               | 14                                      | 126.2669   | 303                                        | 129.6013      | 0.9743(0.5692-1.6675)    |
| DISORDER, MOTILITY, ESOPHAGUS                                | 3                                       | 27.1958    | 116                                        | 50.081        | 0.543(0.1723-1.7117)     |
| DISORDER, MOTILITY, GASTRIC                                  | 0                                       | 0          | 23                                         | 8.183         | 0(0-Inf)                 |
| DISORDER, MOTILITY, GASTROINTESTINAL                         | 1                                       | 12.3831    | 17                                         | 11.6638       | 1.0617(0.1405-8.0205)    |
| DISORDER, MOTILITY, INTESTINE                                | 2                                       | 16.1447    | 30                                         | 10.6777       | 1.512(0.3589-6.3697)     |
| DISORDER, MOTILITY, NOS                                      | 0                                       | 0          | 3                                          | 3.7598        | 0(0-Inf)                 |
| DISORDER, MOTOR SPEECH                                       | 0                                       | 0          | 3                                          | 1.2104        | 0(0-Inf)                 |
| DISORDER, MOVEMENT                                           | 4                                       | 39.7571    | 68                                         | 33.7509       | 1.178(0.4283-3.2398)     |
| DISORDER, MOVEMENT, INVOLUNTARY                              | 0                                       | 0          | 6                                          | 4.0956        | 0(0-Inf)                 |
| DISORDER, MYELOPROLIFERATIVE                                 | 6                                       | 57.9213    | 41                                         | 19.3864       | 2.9877(1.2607-7.0804)    |
| DISORDER, NEUROMUSCULAR                                      | 0                                       | 0          | 13                                         | 9.2874        | 0(0-Inf)                 |
| DISORDER, NEUROPATHIC, SEE ALSO NEUROPATHY                   | 0                                       | 0          | 1                                          | 0.234         | 0(0-Inf)                 |
| DISORDER, OPTIC DISC, NEC/NOS                                | 0                                       | 0          | 6                                          | 2.1736        | 0(0-Inf)                 |
| DISORDER, OPTIC NERVE, NOS                                   | 0                                       | 0          | 9                                          | 5.0954        | 0(0-Inf)                 |
| DISORDER, PARANOID, SEE ALSO PARANOIA                        | 0                                       | 0          | 17                                         | 6.9118        | 0(0-Inf)                 |
| DISORDER, PERSONALITY, NOS (SEE ALSO PERSONALITY)            | 8                                       | 60.1828    | 211                                        | 49.5344       | 1.215(0.5984-2.4669)     |
| DISORDER, PLASMA PROLIFERATIVE                               | 11                                      | 87.0551    | 9                                          | 3.1076        | 28.0138(11.4183-68.7295) |
| DISORDER, PLATELET                                           | 0                                       | 0          | 6                                          | 1.4005        | 0(0-Inf)                 |
| DISORDER, POLYGLANDULAR                                      | 0                                       | 0          | 1                                          | 0.3526        | 0(0-Inf)                 |
| DISORDER, PSYCHOGENIC, CARDIOVASCULAR                        | 0                                       | 0          | 2                                          | 0.7961        | 0(0-Inf)                 |
| DISORDER, PSYCHOGENIC, GASTROINTESTINAL                      | 0                                       | 0          | 27                                         | 7.8234        | 0(0-Inf)                 |
| DISORDER, PSYCHOGENIC, GENITOURINARY                         | 0                                       | 0          | 23                                         | 5.8947        | 0(0-Inf)                 |
| DISORDER, PSYCHOGENIC, MUSCULOSKELETAL                       | 0                                       | 0          | 15                                         | 3.7087        | 0(0-Inf)                 |
| DISORDER, PSYCHOGENIC, NOS                                   | 2                                       | 14.1795    | 38                                         | 8.9297        | 1.5879(0.3807-6.6231)    |
| DISORDER, PSYCHOGENIC, RESPIRATORY                           | 0                                       | 0          | 6                                          | 1.7432        | 0(0-Inf)                 |
| DISORDER, PSYCHOGENIC, SENSE ORGANS                          | 0                                       | 0          | 3                                          | 0.8117        | 0(0-Inf)                 |
| DISORDER, PSYCHOGENIC, SKIN                                  | 0                                       | 0          | 1                                          | 0.2354        | 0(0-Inf)                 |
| DISORDER, PSYCHOMOTOR                                        | 0                                       | 0          | 4                                          | 1.5028        | 0(0-Inf)                 |
| DISORDER, PSYCHOSEXUAL IDENTITY                              | 0                                       | 0          | 1                                          | 1.0364        | 0(0-Inf)                 |
| DISORDER, QUALITATIVE PLATELET                               | 0                                       | 0          | 2                                          | 0.432         | 0(0-Inf)                 |
| DISORDER, REFLEX, SEE ALSO DISORDER, MOTILITY FOR G I SYSTEM | 0                                       | 0          | 6                                          | 1.7425        | 0(0-Inf)                 |
| DISORDER, RETINAL NEC                                        | 0                                       | 0          | 3                                          | 0.9772        | 0(0-Inf)                 |
| DISORDER, RETINAL NOS                                        | 0                                       | 0          | 7                                          | 2.7944        | 0(0-Inf)                 |
| DISORDER, RHEUMATIC, NOS                                     | 0                                       | 0          | 4                                          | 2.4139        | 0(0-Inf)                 |
| DISORDER, SCHIZO-AFFECTIVE, SEE ALSO SCHIZOPHRENIA           | 1                                       | 7.0132     | 41                                         | 10.7415       | 0.6529(0.0894-4.767)     |
| DISORDER, SEIZURE, NOS--DOSZ                                 | 11                                      | 85.5309    | 341                                        | 112.9502      | 0.7572(0.4148-1.3823)    |
| DISORDER, SENSE OF SMELL                                     | 1                                       | 6.9757     | 32                                         | 8.4397        | 0.8265(0.1124-6.0785)    |
| DISORDER, SENSE OF TASTE                                     | 1                                       | 7.2051     | 36                                         | 10.3532       | 0.6959(0.095-5.0963)     |
| DISORDER, SLEEP--DOSL                                        | 36                                      | 292.0764   | 973                                        | 347.8252      | 0.8397(0.6016-1.1721)    |

| Description                                                       | No. of Positive Cases with Disease Code | Case Rate* | No. of Positive Controls with Disease Code | Control Rate* | Relative Risk (95%CI)  |
|-------------------------------------------------------------------|-----------------------------------------|------------|--------------------------------------------|---------------|------------------------|
| DISORDER, SPEECH                                                  | 1                                       | 9.3401     | 72                                         | 32.5421       | 0.287(0.0398-2.069)    |
| DISORDER, STRESS (POST-TRAUMATIC)--PTSD                           | 1                                       | 6.9656     | 28                                         | 6.7117        | 1.0378(0.1404-7.6725)  |
| DISORDER, SWALLOWING                                              | 7                                       | 89.0976    | 202                                        | 143.7736      | 0.6197(0.2913-1.3181)  |
| DISORDER, T CELL CLONAL                                           | 0                                       | 0          | 2                                          | 1.1972        | 0(0-Inf)               |
| DISORDER, TEAR FILM                                               | 0                                       | 0          | 31                                         | 15.231        | 0(0-Inf)               |
| DISORDER, THROMBOEMBOLIC                                          | 0                                       | 0          | 4                                          | 1.3628        | 0(0-Inf)               |
| DISORDER, TOOTH DEVELOPMENT, NEC                                  | 0                                       | 0          | 5                                          | 1.2652        | 0(0-Inf)               |
| DISORDER, VITREOUS, NEC                                           | 0                                       | 0          | 18                                         | 6.1592        | 0(0-Inf)               |
| DISORDER, VOICE                                                   | 1                                       | 8.1608     | 23                                         | 8.3487        | 0.9775(0.1312-7.2825)  |
| DISORDER, VOICE, DUE TO VOCAL ABUSE                               | 0                                       | 0          | 5                                          | 1.2868        | 0(0-Inf)               |
| DISORDER, VOICE, ORGANIC                                          | 0                                       | 0          | 6                                          | 1.4132        | 0(0-Inf)               |
| DISORIENTATION                                                    | 1                                       | 13.4487    | 27                                         | 20.7698       | 0.6475(0.0877-4.7801)  |
| DISPLACEMENT, KIDNEY, NOS                                         | 0                                       | 0          | 1                                          | 0.398         | 0(0-Inf)               |
| DISPLACEMENT, NAIL, ACQUIRED                                      | 0                                       | 0          | 2                                          | 0.6775        | 0(0-Inf)               |
| DISPLACEMENT, PACEMAKER                                           | 0                                       | 0          | 1                                          | 0.8529        | 0(0-Inf)               |
| DISPROPORTION, CEPHALOPELVIC, COMPLICATING DELIVERY               | 0                                       | 0          | 1                                          | 0.8277        | 0(0-Inf)               |
| DISRUPTION, BOWMAN'S MEMBRANE                                     | 0                                       | 0          | 1                                          | 0.2729        | 0(0-Inf)               |
| DISRUPTION, OF OSSICULAR CHAIN                                    | 0                                       | 0          | 3                                          | 0.7063        | 0(0-Inf)               |
| DISSECTION, VASCULAR, GENERALIZED                                 | 0                                       | 0          | 2                                          | 0.5069        | 0(0-Inf)               |
| DISSOCIATION, ATRIOVENTRICULAR, (CONGENITAL)                      | 0                                       | 0          | 3                                          | 0.9609        | 0(0-Inf)               |
| DISSOCIATION, ELECTROMECHANICAL (E.M.D.), SEE ALSO FAILURE, HEART | 0                                       | 0          | 7                                          | 4.4321        | 0(0-Inf)               |
| DISSOCIATION, PERSONALITY, SEE ALSO NEUROSIS                      | 0                                       | 0          | 1                                          | 0.8528        | 0(0-Inf)               |
| DISSOCIATION, SCAPHOLUNATE, NON-TRAUMATIC                         | 1                                       | 7.2905     | 20                                         | 5.9004        | 1.2356(0.1646-9.2746)  |
| DISSOCIATION, SCAPHOLUNATE, TRAUMATIC                             | 1                                       | 8.0496     | 14                                         | 4.9668        | 1.6207(0.2111-12.4427) |
| DISTENTION, ABDOMEN                                               | 3                                       | 35.2281    | 143                                        | 91.6917       | 0.3842(0.1223-1.2069)  |
| DISTENTION, BLADDER                                               | 1                                       | 9.5288     | 12                                         | 5.6265        | 1.6936(0.2185-13.1281) |
| DISTENTION, INTESTINE                                             | 1                                       | 9.3102     | 14                                         | 6.2929        | 1.4795(0.193-11.3412)  |
| DISTICHIASIS                                                      | 0                                       | 0          | 5                                          | 3.7996        | 0(0-Inf)               |
| DISTORTION, CHEST                                                 | 0                                       | 0          | 1                                          | 0.4751        | 0(0-Inf)               |
| DISTORTION, INTESTINE                                             | 0                                       | 0          | 5                                          | 2.2764        | 0(0-Inf)               |
| DISTRESS, ABDOMINAL                                               | 1                                       | 6.9705     | 63                                         | 16.1604       | 0.4313(0.0597-3.1184)  |
| DISTRESS, BOWEL, FUNCTIONAL                                       | 0                                       | 0          | 1                                          | 0.3526        | 0(0-Inf)               |
| DISTRESS, FETAL, WITH DELIVERY (MOTHER'S HISTORY)                 | 0                                       | 0          | 9                                          | 5.8075        | 0(0-Inf)               |
| DISTRESS, GASTROINTESTINAL/EPIGASTRIC, FUNCTIONAL                 | 2                                       | 30.3717    | 51                                         | 17.984        | 1.6888(0.4096-6.963)   |
| DISTRESS, GASTROINTESTINAL/EPIGASTRIC, NOS                        | 6                                       | 42.1345    | 217                                        | 57.4009       | 0.734(0.3256-1.655)    |
| DISTRESS, RESPIRATORY                                             | 8                                       | 117.6231   | 140                                        | 121.3498      | 0.9693(0.4746-1.9794)  |
| DISTURBANCE, BEHAVIOR, ADOLESCENCE                                | 0                                       | 0          | 1                                          | 0.2729        | 0(0-Inf)               |
| DISTURBANCE, BEHAVIOR, CHILD                                      | 0                                       | 0          | 1                                          | 0.853         | 0(0-Inf)               |
| DISTURBANCE, BEHAVIOR, NOS                                        | 31                                      | 477.758    | 403                                        | 374.835       | 1.2746(0.8836-1.8385)  |

| Description                                                                          | No. of Positive Cases with Disease Code | Case Rate* | No. of Positive Controls with Disease Code | Control Rate* | Relative Risk (95%CI)  |
|--------------------------------------------------------------------------------------|-----------------------------------------|------------|--------------------------------------------|---------------|------------------------|
| DISTURBANCE, BLADDER, FUNCTIONAL                                                     | 0                                       | 0          | 1                                          | 0.3526        | 0(0-Inf)               |
| DISTURBANCE, BONE MARROW                                                             | 0                                       | 0          | 4                                          | 2.9158        | 0(0-Inf)               |
| DISTURBANCE, CIRCULATORY                                                             | 2                                       | 20.9279    | 103                                        | 54.8499       | 0.3815(0.094-1.5483)   |
| DISTURBANCE, CONDUCTION                                                              | 2                                       | 28.2776    | 50                                         | 40.5528       | 0.6973(0.1693-2.8722)  |
| DISTURBANCE, EMOTIONAL                                                               | 14                                      | 98.3051    | 331                                        | 79.9386       | 1.2298(0.719-2.1034)   |
| DISTURBANCE, ENDOCRINE                                                               | 0                                       | 0          | 4                                          | 0.967         | 0(0-Inf)               |
| DISTURBANCE, FEEDING / EATING, NOS                                                   | 1                                       | 6.9474     | 109                                        | 26.1478       | 0.2657(0.037-1.9055)   |
| DISTURBANCE, FEEDING, PSYCHOGENIC                                                    | 0                                       | 0          | 22                                         | 5.002         | 0(0-Inf)               |
| DISTURBANCE, FUNCTIONAL, NOS, SEE ALSO DISORDER, PSYCHOGENIC, PART OF BODY SPECIFIED | 3                                       | 21.7909    | 116                                        | 27.3024       | 0.7981(0.2531-2.517)   |
| DISTURBANCE, GAIT                                                                    | 61                                      | 987.2166   | 1126                                       | 1066.5229     | 0.9256(0.715-1.1983)   |
| DISTURBANCE, LEARNING                                                                | 0                                       | 0          | 9                                          | 2.9442        | 0(0-Inf)               |
| DISTURBANCE, MACULAR                                                                 | 1                                       | 9.1266     | 23                                         | 10.0328       | 0.9097(0.1222-6.7728)  |
| DISTURBANCE, MOTOR                                                                   | 0                                       | 0          | 37                                         | 15.447        | 0(0-Inf)               |
| DISTURBANCE, NUTRITIONAL                                                             | 10                                      | 138.5089   | 180                                        | 143.365       | 0.9661(0.5103-1.829)   |
| DISTURBANCE, POLYGLANDULAR                                                           | 0                                       | 0          | 2                                          | 0.7961        | 0(0-Inf)               |
| DISTURBANCE, SENSORY                                                                 | 1                                       | 7.5296     | 42                                         | 13.1794       | 0.5713(0.0783-4.1661)  |
| DISTURBANCE, SLEEP                                                                   | 18                                      | 156.5025   | 585                                        | 236.6783      | 0.6612(0.4133-1.058)   |
| DISTURBANCE, SPEECH, STAMMERING                                                      | 0                                       | 0          | 1                                          | 0.234         | 0(0-Inf)               |
| DISTURBANCE, SYMPATHETIC                                                             | 0                                       | 0          | 1                                          | 0.4048        | 0(0-Inf)               |
| DISTURBANCE, VASCULAR                                                                | 0                                       | 0          | 4                                          | 1.3637        | 0(0-Inf)               |
| DISTURBANCE, VASOMOTOR                                                               | 0                                       | 0          | 21                                         | 4.8743        | 0(0-Inf)               |
| DISTURBANCE, VASOSPASTIC                                                             | 0                                       | 0          | 4                                          | 0.9363        | 0(0-Inf)               |
| DISTURBANCE, VISUAL NEC                                                              | 7                                       | 70.8392    | 147                                        | 74.937        | 0.9453(0.442-2.0219)   |
| DISTURBANCE, VISUAL NOS                                                              | 40                                      | 432.9546   | 953                                        | 531.3149      | 0.8149(0.5935-1.1189)  |
| DIVERTICULITIS, CECUM                                                                | 0                                       | 0          | 1                                          | 0.8529        | 0(0-Inf)               |
| DIVERTICULITIS, COLON                                                                | 3                                       | 22.7673    | 47                                         | 14.946        | 1.5233(0.4717-4.9193)  |
| DIVERTICULITIS, NOS, SEE ALSO DIVERTICULUM                                           | 27                                      | 212.5168   | 680                                        | 227.0242      | 0.9361(0.6365-1.3767)  |
| DIVERTICULITIS, RECTOSIGMOID                                                         | 0                                       | 0          | 1                                          | 0.2729        | 0(0-Inf)               |
| DIVERTICULITIS, RECTUM                                                               | 0                                       | 0          | 2                                          | 0.5908        | 0(0-Inf)               |
| DIVERTICULITIS, SIGMOID                                                              | 12                                      | 87.0757    | 181                                        | 51.8002       | 1.681(0.9345-3.0239)   |
| DIVERTICULITIS, SMALL INTESTINE                                                      | 0                                       | 0          | 3                                          | 2.8242        | 0(0-Inf)               |
| DIVERTICULOSIS COLON (SEE ALSO DIVERTICULUM)                                         | 107                                     | 996.9591   | 2704                                       | 1129.1871     | 0.8829(0.7274-1.0716)  |
| DIVERTICULUM, AORTA                                                                  | 0                                       | 0          | 1                                          | 0.2354        | 0(0-Inf)               |
| DIVERTICULUM, BILIARY TRACT, NOS                                                     | 0                                       | 0          | 1                                          | 0.2354        | 0(0-Inf)               |
| DIVERTICULUM, BLADDER, NOS                                                           | 10                                      | 120.0909   | 122                                        | 77.9703       | 1.5402(0.8067-2.9408)  |
| DIVERTICULUM, CARDIA                                                                 | 0                                       | 0          | 4                                          | 0.942         | 0(0-Inf)               |
| DIVERTICULUM, CECUM                                                                  | 1                                       | 8.4819     | 12                                         | 4.7198        | 1.7971(0.2316-13.9459) |
| DIVERTICULUM, COLON                                                                  | 59                                      | 512.5474   | 1286                                       | 489.4072      | 1.0473(0.8061-1.3606)  |
| DIVERTICULUM, COLON, WITH DIVERTICULITIS                                             | 2                                       | 14.2993    | 22                                         | 6.1251        | 2.3345(0.5437-10.0247) |

| Description                                       | No. of Positive Cases with Disease Code | Case Rate* | No. of Positive Controls with Disease Code | Control Rate* | Relative Risk (95%CI)  |
|---------------------------------------------------|-----------------------------------------|------------|--------------------------------------------|---------------|------------------------|
| DIVERTICULUM, DUODENUM                            | 6                                       | 52.1048    | 108                                        | 42.9197       | 1.214(0.532-2.7702)    |
| DIVERTICULUM, EPIPHRENIC                          | 0                                       | 0          | 4                                          | 1.3633        | 0(0-Inf)               |
| DIVERTICULUM, ESOPHAGUS, NOS                      | 3                                       | 28.6203    | 54                                         | 25.1661       | 1.1373(0.3543-3.6504)  |
| DIVERTICULUM, GALLBLADDER                         | 0                                       | 0          | 2                                          | 1.0786        | 0(0-Inf)               |
| DIVERTICULUM, GASTRIC FUNDUS                      | 0                                       | 0          | 4                                          | 1.1698        | 0(0-Inf)               |
| DIVERTICULUM, ILEUM                               | 1                                       | 9.7973     | 9                                          | 4.3655        | 2.2443(0.2811-17.9196) |
| DIVERTICULUM, INTESTINE, LARGE, NOS               | 1                                       | 9.5433     | 9                                          | 4.216         | 2.2636(0.2837-18.0581) |
| DIVERTICULUM, INTESTINE, NOS                      | 0                                       | 0          | 12                                         | 4.2945        | 0(0-Inf)               |
| DIVERTICULUM, INTESTINE, NOS, WITH DIVERTICULITIS | 0                                       | 0          | 3                                          | 0.8019        | 0(0-Inf)               |
| DIVERTICULUM, INTESTINE, SMALL, NOS               | 4                                       | 32.5886    | 5                                          | 1.811         | 17.9952(4.721-68.5933) |
| DIVERTICULUM, JEJUNUM                             | 0                                       | 0          | 10                                         | 6.4869        | 0(0-Inf)               |
| DIVERTICULUM, JEJUNUM, WITH DIVERTICULITIS        | 0                                       | 0          | 1                                          | 1.909         | 0(0-Inf)               |
| DIVERTICULUM, KIDNEY, CALYX                       | 0                                       | 0          | 5                                          | 1.3793        | 0(0-Inf)               |
| DIVERTICULUM, MECKEL'S                            | 0                                       | 0          | 29                                         | 6.9491        | 0(0-Inf)               |
| DIVERTICULUM, PARAURETERAL                        | 0                                       | 0          | 1                                          | 0.3527        | 0(0-Inf)               |
| DIVERTICULUM, PERIAMPULLARY                       | 2                                       | 21.2968    | 16                                         | 8.7605        | 2.431(0.5544-10.6601)  |
| DIVERTICULUM, PHARYNGO-ESOPHAGEAL, NOS            | 1                                       | 8.009      | 11                                         | 3.913         | 2.0468(0.2614-16.0258) |
| DIVERTICULUM, PHARYNX                             | 0                                       | 0          | 1                                          | 1.9097        | 0(0-Inf)               |
| DIVERTICULUM, PULSION                             | 0                                       | 0          | 1                                          | 6.494         | 0(0-Inf)               |
| DIVERTICULUM, RECTOSIGMOID                        | 0                                       | 0          | 15                                         | 6.1009        | 0(0-Inf)               |
| DIVERTICULUM, RECTUM                              | 0                                       | 0          | 13                                         | 4.7095        | 0(0-Inf)               |
| DIVERTICULUM, RECTUM, WITH DIVERTICULITIS         | 0                                       | 0          | 2                                          | 3.0827        | 0(0-Inf)               |
| DIVERTICULUM, SIGMOID                             | 69                                      | 628.94     | 2062                                       | 882.2246      | 0.7129(0.5606-0.9067)  |
| DIVERTICULUM, SIGMOID, WITH DIVERTICULITIS        | 10                                      | 71.0528    | 80                                         | 21.5055       | 3.3039(1.7025-6.4117)  |
| DIVERTICULUM, SPINAL CORD (ARACHNOID)             | 0                                       | 0          | 1                                          | 0.4049        | 0(0-Inf)               |
| DIVERTICULUM, STOMACH                             | 0                                       | 0          | 15                                         | 5.5328        | 0(0-Inf)               |
| DIVERTICULUM, TRACHEA, ACQUIRED                   | 0                                       | 0          | 1                                          | 0.2354        | 0(0-Inf)               |
| DIVERTICULUM, TRACTION (ESOPHAGUS)                | 0                                       | 0          | 1                                          | 0.2354        | 0(0-Inf)               |
| DIVERTICULUM, URETER                              | 0                                       | 0          | 3                                          | 2.0482        | 0(0-Inf)               |
| DIVERTICULUM, URETHRAL                            | 0                                       | 0          | 6                                          | 1.5597        | 0(0-Inf)               |
| DIVERTICULUM, VESICAL                             | 1                                       | 6.9511     | 3                                          | 0.8645        | 8.0406(0.8177-79.0699) |
| DIVERTICULUM, ZENKER'S                            | 4                                       | 40.1505    | 52                                         | 25.919        | 1.5491(0.5582-4.2989)  |
| DIVISION NERVE (CODE ALSO INJURY NERVE BY SITE)   | 0                                       | 0          | 7                                          | 1.711         | 0(0-Inf)               |
| DIVISUM PANCREAS                                  | 0                                       | 0          | 3                                          | 1.1479        | 0(0-Inf)               |
| DIZZINESS, NOS                                    | 95                                      | 914.7232   | 2113                                       | 933.5926      | 0.9798(0.7973-1.2041)  |
| DIZZINESS, ORTHOSTATIC                            | 0                                       | 0          | 31                                         | 18.215        | 0(0-Inf)               |
| DIZZINESS, POSITIONAL                             | 3                                       | 21.2246    | 115                                        | 31.031        | 0.684(0.2168-2.1576)   |
| DIZZINESS, POSTURAL                               | 10                                      | 70.9252    | 103                                        | 27.2639       | 2.6014(1.353-5.0019)   |
| DOG EAR (SEE ALSO SCAR PART OF BODY SPECIFIED)    | 0                                       | 0          | 3                                          | 1.2147        | 0(0-Inf)               |
| DOLICHOCOLON                                      | 0                                       | 0          | 7                                          | 2.236         | 0(0-Inf)               |



| Description                                     | No. of Positive Cases with Disease Code | Case Rate* | No. of Positive Controls with Disease Code | Control Rate* | Relative Risk (95%CI)   |
|-------------------------------------------------|-----------------------------------------|------------|--------------------------------------------|---------------|-------------------------|
| DOLICHOECTASIA ARTERY (CONGENITAL)              | 0                                       | 0          | 3                                          | 1.0578        | 0(0-Inf)                |
| DOLICHOSIGMOID                                  | 0                                       | 0          | 1                                          | 0.398         | 0(0-Inf)                |
| DONOR, BLOOD--BLDO                              | 7                                       | 71.5436    | 253                                        | 71.6422       | 0.9986(0.4705-2.1195)   |
| DONOR, BONE                                     | 0                                       | 0          | 34                                         | 10.5969       | 0(0-Inf)                |
| DONOR, BONE MARROW--BMDO                        | 1                                       | 8.7783     | 3                                          | 0.8129        | 10.799(1.0897-107.018)  |
| DONOR, KIDNEY--KDDO                             | 0                                       | 0          | 14                                         | 4.6501        | 0(0-Inf)                |
| DONOR, NEC                                      | 0                                       | 0          | 1                                          | 0.8878        | 0(0-Inf)                |
| DONOR, PERIPHERAL STEM CELL HARVEST             | 1                                       | 6.8778     | 0                                          | 0             | 12222645741.3876(0-Inf) |
| DONOR, PERIPHERAL STEM CELL HARVEST, AUTOLOGOUS | 0                                       | 0          | 4                                          | 1.0273        | 0(0-Inf)                |
| DRAINAGE, AMPUTATION STUMP                      | 0                                       | 0          | 3                                          | 0.7175        | 0(0-Inf)                |
| DRAINAGE, WOUND (CHRONIC) (POSTOP)              | 3                                       | 31.964     | 101                                        | 55.4185       | 0.5768(0.1826-1.8218)   |
| DRESSING CHANGE                                 | 3                                       | 22.336     | 55                                         | 16.9501       | 1.3178(0.4105-4.2306)   |
| DRIBBLING (URINARY)                             | 0                                       | 0          | 25                                         | 13.8481       | 0(0-Inf)                |
| DRIP (POSTNASAL)                                | 30                                      | 229.0985   | 810                                        | 255.2888      | 0.8974(0.6227-1.2933)   |
| DROOLING                                        | 1                                       | 15.7668    | 10                                         | 9.9074        | 1.5914(0.2024-12.5113)  |
| DROOP, FACIAL                                   | 2                                       | 23.3894    | 25                                         | 15.948        | 1.4666(0.3455-6.2253)   |
| DROP, ATTACK                                    | 0                                       | 0          | 1                                          | 6.4905        | 0(0-Inf)                |
| DROP, FOOT                                      | 4                                       | 34.8969    | 129                                        | 52.4679       | 0.6651(0.2454-1.8023)   |
| DROP, SHOULDER                                  | 0                                       | 0          | 2                                          | 0.7051        | 0(0-Inf)                |
| DROP, WRIST                                     | 0                                       | 0          | 7                                          | 2.9678        | 0(0-Inf)                |
| DROWNING, ACCIDENT                              | 0                                       | 0          | 1                                          | 0.8877        | 0(0-Inf)                |
| DROWNING, NEAR                                  | 0                                       | 0          | 1                                          | 0.3526        | 0(0-Inf)                |
| DROWSINESS                                      | 1                                       | 10.5833    | 44                                         | 23.8843       | 0.4431(0.0609-3.224)    |
| DRUG INTOLERANCE (HISTORY OF)                   | 9                                       | 76.8016    | 209                                        | 81.4836       | 0.9425(0.4827-1.8405)   |
| DRUG SEEKING BEHAVIOR                           | 0                                       | 0          | 2                                          | 0.5458        | 0(0-Inf)                |
| DRUSEN, MACULAR                                 | 19                                      | 210.6691   | 359                                        | 208.1721      | 1.012(0.6372-1.6074)    |
| DRUSEN, NOS                                     | 16                                      | 156.9279   | 282                                        | 133.8935      | 1.172(0.7072-1.9425)    |
| DRUSEN, OPTIC DISCS                             | 0                                       | 0          | 19                                         | 4.7466        | 0(0-Inf)                |
| DRUSEN, RETINAL (FAMILIAL)                      | 0                                       | 0          | 4                                          | 0.9521        | 0(0-Inf)                |
| DRY, EYES                                       | 52                                      | 444.0535   | 1253                                       | 470.3278      | 0.9441(0.7148-1.247)    |
| DRY, LARYNX                                     | 0                                       | 0          | 7                                          | 1.9183        | 0(0-Inf)                |
| DRY, MOUTH                                      | 12                                      | 108.9371   | 208                                        | 89.0131       | 1.2238(0.6825-2.1945)   |
| DRY, NOSE                                       | 3                                       | 23.5745    | 82                                         | 27.9003       | 0.845(0.2662-2.682)     |
| DRY, SKIN                                       | 24                                      | 216.0881   | 568                                        | 237.0025      | 0.9118(0.6054-1.3732)   |
| DRY, SOCKET                                     | 0                                       | 0          | 11                                         | 2.5745        | 0(0-Inf)                |
| DRY, THROAT                                     | 4                                       | 28.8037    | 72                                         | 20.4728       | 1.4069(0.5118-3.8672)   |
| DRYNESS - VAGINA                                | 2                                       | 27.6175    | 70                                         | 32.2724       | 0.8558(0.209-3.5036)    |
| DUCT THYROGLOSSAL                               | 0                                       | 0          | 1                                          | 0.2729        | 0(0-Inf)                |
| DUCTOPENIA (BILIARY)                            | 0                                       | 0          | 3                                          | 0.7021        | 0(0-Inf)                |
| DUODENITIS, NOS                                 | 24                                      | 186.285    | 443                                        | 147.6929      | 1.2613(0.8353-1.9046)   |

| Description                                         | No. of Positive Cases with Disease Code | Case Rate* | No. of Positive Controls with Disease Code | Control Rate* | Relative Risk (95%CI)    |
|-----------------------------------------------------|-----------------------------------------|------------|--------------------------------------------|---------------|--------------------------|
| DUODENITIS, WITH HEMORRHAGE                         | 0                                       | 0          | 3                                          | 0.9167        | 0(0-Inf)                 |
| DUPLICATION, KIDNEY, COLLECTING SYSTEM              | 1                                       | 8.3768     | 9                                          | 3.427         | 2.4443(0.3057-19.5466)   |
| DUPLICATION, KIDNEY, CONGENITAL                     | 1                                       | 7.2134     | 2                                          | 0.4643        | 15.5375(1.3405-180.0949) |
| DUPLICATION, URETER, CONGENITAL                     | 0                                       | 0          | 9                                          | 2.5138        | 0(0-Inf)                 |
| DUPUYTREN'S, DIAPHYSIS BOTH HANDS                   | 0                                       | 0          | 3                                          | 0.7175        | 0(0-Inf)                 |
| DWARFISM, NOS                                       | 0                                       | 0          | 1                                          | 0.3527        | 0(0-Inf)                 |
| DYSACUSIS                                           | 0                                       | 0          | 1                                          | 0.234         | 0(0-Inf)                 |
| DYSARTHRIA, ATAXIC                                  | 1                                       | 8.0983     | 19                                         | 6.8498        | 1.1823(0.1572-8.892)     |
| DYSARTHRIA, FLACCID                                 | 3                                       | 25.8381    | 16                                         | 6.3414        | 4.0745(1.1728-14.1555)   |
| DYSARTHRIA, HYPERKINETIC                            | 0                                       | 0          | 6                                          | 1.7425        | 0(0-Inf)                 |
| DYSARTHRIA, HYPOKINETIC                             | 1                                       | 10.3691    | 29                                         | 15.3542       | 0.6753(0.0917-4.9738)    |
| DYSARTHRIA, MIXED                                   | 1                                       | 8.7947     | 20                                         | 8.2256        | 1.0692(0.1426-8.0189)    |
| DYSARTHRIA, NOS                                     | 10                                      | 107.6355   | 173                                        | 96.3315       | 1.1173(0.5895-2.1177)    |
| DYSARTHRIA, SPASTIC                                 | 1                                       | 8.2581     | 28                                         | 10.3714       | 0.7962(0.1078-5.8818)    |
| DYSAUTONOMIA, NOS                                   | 3                                       | 34.4378    | 12                                         | 7.2922        | 4.7226(1.3183-16.9173)   |
| DYSCALCULIA                                         | 0                                       | 0          | 2                                          | 1.7757        | 0(0-Inf)                 |
| DYSCHIZIA                                           | 0                                       | 0          | 7                                          | 3.5096        | 0(0-Inf)                 |
| DYSCONDROPLASIA                                     | 1                                       | 11.3217    | 0                                          | 0             | 7476299828.187(0-Inf)    |
| DYSCOLLAGENOSIS                                     | 0                                       | 0          | 1                                          | 0.398         | 0(0-Inf)                 |
| DYSCRASIA, PLASMA CELL                              | 0                                       | 0          | 1                                          | 0.8528        | 0(0-Inf)                 |
| DYSENTERY, AMEBIC                                   | 1                                       | 11.2612    | 9                                          | 2.5697        | 4.3823(0.5468-35.1238)   |
| DYSENTERY, BACILLARY, NEC                           | 0                                       | 0          | 1                                          | 0.8542        | 0(0-Inf)                 |
| DYSENTERY, FLEXNER                                  | 0                                       | 0          | 1                                          | 0.398         | 0(0-Inf)                 |
| DYSENTERY, NOS                                      | 0                                       | 0          | 2                                          | 0.4681        | 0(0-Inf)                 |
| DYSENTERY, SALMONELLA                               | 0                                       | 0          | 3                                          | 0.7064        | 0(0-Inf)                 |
| DYSENTERY, SHIGELLOSIS, NOS                         | 0                                       | 0          | 5                                          | 1.1528        | 0(0-Inf)                 |
| DYSEQUILIBRIUM (ORTHOSTATIC)                        | 7                                       | 63.4199    | 227                                        | 97.6233       | 0.6496(0.3058-1.3803)    |
| DYSESTHESIA                                         | 19                                      | 135.537    | 312                                        | 83.5617       | 1.622(1.0186-2.5829)     |
| DYSFUNCTION, ADRENAL                                | 0                                       | 0          | 4                                          | 1.0352        | 0(0-Inf)                 |
| DYSFUNCTION, AUTONOMIC, (CHILDHOOD/ADOLESCENT), NOS | 0                                       | 0          | 2                                          | 1.7756        | 0(0-Inf)                 |
| DYSFUNCTION, AUTONOMIC, NOS                         | 2                                       | 24.7217    | 55                                         | 37.3093       | 0.6626(0.1613-2.7228)    |
| DYSFUNCTION, A-V NODAL                              | 0                                       | 0          | 6                                          | 4.1765        | 0(0-Inf)                 |
| DYSFUNCTION, BLADDER                                | 7                                       | 69.3064    | 104                                        | 51.0481       | 1.3577(0.6298-2.9267)    |
| DYSFUNCTION, BLADDER, NEUROGENIC                    | 0                                       | 0          | 9                                          | 2.1427        | 0(0-Inf)                 |
| DYSFUNCTION, BOWEL                                  | 2                                       | 16.0903    | 24                                         | 8.5215        | 1.8882(0.443-8.0489)     |
| DYSFUNCTION, BOWEL, INDETERMINATE                   | 0                                       | 0          | 2                                          | 0.4709        | 0(0-Inf)                 |
| DYSFUNCTION, BRAIN, SEE ALSO SYNDROME, ORGANIC      | 0                                       | 0          | 7                                          | 5.0586        | 0(0-Inf)                 |
| DYSFUNCTION, CARDIAC, NOS                           | 0                                       | 0          | 23                                         | 12.2384       | 0(0-Inf)                 |
| DYSFUNCTION, CARDIAC, VENTRICULAR, NOS              | 0                                       | 0          | 28                                         | 21.0583       | 0(0-Inf)                 |
| DYSFUNCTION, CARTILAGE                              | 0                                       | 0          | 8                                          | 2.8804        | 0(0-Inf)                 |

| Description                                | No. of Positive Cases with Disease Code | Case Rate* | No. of Positive Controls with Disease Code | Control Rate* | Relative Risk (95%CI)  |
|--------------------------------------------|-----------------------------------------|------------|--------------------------------------------|---------------|------------------------|
| DYSFUNCTION, CEREBRAL                      | 1                                       | 7.5426     | 13                                         | 4.1998        | 1.7959(0.2327-13.8588) |
| DYSFUNCTION, COLOSTOMY                     | 0                                       | 0          | 1                                          | 0.853         | 0(0-Inf)               |
| DYSFUNCTION, DIASTOLIC (HEART)             | 21                                      | 256.4152   | 326                                        | 219.8022      | 1.1666(0.7494-1.8161)  |
| DYSFUNCTION, ERECTILE , SEE ALSO IMPOTENCE | 58                                      | 518.1494   | 1593                                       | 686.2013      | 0.7551(0.5808-0.9817)  |
| DYSFUNCTION, ESOPHAGUS (MOTILITY)          | 1                                       | 8.7264     | 10                                         | 4.0671        | 2.1456(0.2716-16.9506) |
| DYSFUNCTION, EUSTACHIAN TUBE               | 25                                      | 176.6108   | 835                                        | 216.0277      | 0.8175(0.5486-1.2182)  |
| DYSFUNCTION, HEPATIC, DRUG-INDUCED         | 0                                       | 0          | 5                                          | 1.7686        | 0(0-Inf)               |
| DYSFUNCTION, HEPATIC, NOS                  | 0                                       | 0          | 67                                         | 16.508        | 0(0-Inf)               |
| DYSFUNCTION, KIDNEY                        | 5                                       | 49.923     | 60                                         | 29.8389       | 1.6731(0.6693-4.1822)  |
| DYSFUNCTION, LABYRINTHINE                  | 4                                       | 27.8871    | 57                                         | 13.9141       | 2.0042(0.7231-5.5556)  |
| DYSFUNCTION, LIGAMENT                      | 0                                       | 0          | 1                                          | 0.234         | 0(0-Inf)               |
| DYSFUNCTION, LIVER, CONSTITUTIONAL         | 0                                       | 0          | 2                                          | 0.5709        | 0(0-Inf)               |
| DYSFUNCTION, MASSETER MUSCLE               | 2                                       | 15.3948    | 15                                         | 4.9043        | 3.139(0.709-13.8971)   |
| DYSFUNCTION, MEIBOMIAN (GLAND)             | 20                                      | 173.629    | 620                                        | 247.6039      | 0.7012(0.4488-1.0956)  |
| DYSFUNCTION, MENSTRUAL                     | 0                                       | 0          | 4                                          | 1.8968        | 0(0-Inf)               |
| DYSFUNCTION, MITRAL, SEE ALSO DISEASE      | 0                                       | 0          | 1                                          | 0.2354        | 0(0-Inf)               |
| DYSFUNCTION, MUSCLE, NOS                   | 0                                       | 0          | 19                                         | 5.5175        | 0(0-Inf)               |
| DYSFUNCTION, NERVE, ACQUIRED               | 1                                       | 7.5278     | 5                                          | 1.6098        | 4.6761(0.5352-40.8579) |
| DYSFUNCTION, NEUROGENIC BLADDER            | 1                                       | 7.5608     | 8                                          | 1.8153        | 4.1651(0.5106-33.9738) |
| DYSFUNCTION, PAPILLARY MUSCLE              | 0                                       | 0          | 6                                          | 4.0964        | 0(0-Inf)               |
| DYSFUNCTION, PELVIC FLOOR (FEMALE)         | 1                                       | 13.7749    | 23                                         | 10.7453       | 1.2819(0.1717-9.5713)  |
| DYSFUNCTION, PELVIS FLOOR (MALE)           | 0                                       | 0          | 3                                          | 2.0483        | 0(0-Inf)               |
| DYSFUNCTION, PITUITARY, HYPERFUNCTIONING   | 0                                       | 0          | 1                                          | 0.3526        | 0(0-Inf)               |
| DYSFUNCTION, PITUITARY, HYPOFUNCTIONING    | 0                                       | 0          | 1                                          | 2.4855        | 0(0-Inf)               |
| DYSFUNCTION, RECTUM                        | 0                                       | 0          | 18                                         | 6.0119        | 0(0-Inf)               |
| DYSFUNCTION, ROTATOR CUFF                  | 0                                       | 0          | 32                                         | 16.1556       | 0(0-Inf)               |
| DYSFUNCTION, SEXUAL                        | 5                                       | 35.3278    | 136                                        | 38.9582       | 0.9068(0.3707-2.2182)  |
| DYSFUNCTION, SINUS NODE                    | 5                                       | 68.4465    | 142                                        | 111.6809      | 0.6129(0.2509-1.4971)  |
| DYSFUNCTION, SOMATIC, RIB CAGE             | 0                                       | 0          | 1                                          | 0.3526        | 0(0-Inf)               |
| DYSFUNCTION, SOMATIC, TRUNK / BACK         | 0                                       | 0          | 1                                          | 0.3526        | 0(0-Inf)               |
| DYSFUNCTION, SPHINCTER OF ODDI             | 0                                       | 0          | 5                                          | 2.0357        | 0(0-Inf)               |
| DYSFUNCTION, SYSTOLIC (HEART)              | 6                                       | 69.0863    | 132                                        | 80.5612       | 0.8576(0.3777-1.9469)  |
| DYSFUNCTION, TEMPOROMANDIBULAR JOINT--TMJD | 10                                      | 77.525     | 260                                        | 59.7055       | 1.2985(0.6889-2.4473)  |
| DYSFUNCTION, TENDON, NOS                   | 0                                       | 0          | 13                                         | 4.013         | 0(0-Inf)               |
| DYSFUNCTION, TESTICULAR                    | 0                                       | 0          | 3                                          | 0.8712        | 0(0-Inf)               |
| DYSFUNCTION, THYROID                       | 1                                       | 8.7536     | 18                                         | 7.3467        | 1.1915(0.158-8.988)    |
| DYSFUNCTION, TIBIALIS POSTERIOR            | 3                                       | 22.9571    | 97                                         | 31.2666       | 0.7342(0.2321-2.3228)  |
| DYSFUNCTION, URETERAL                      | 0                                       | 0          | 1                                          | 0.234         | 0(0-Inf)               |
| DYSFUNCTION, UTERINE BLEEDING              | 1                                       | 25.5187    | 22                                         | 12.0019       | 2.1262(0.2848-15.8712) |
| DYSFUNCTION, VELOPHARYNGEAL                | 0                                       | 0          | 1                                          | 0.8877        | 0(0-Inf)               |

| Description                                | No. of Positive Cases with Disease Code | Case Rate* | No. of Positive Controls with Disease Code | Control Rate* | Relative Risk (95%CI)    |
|--------------------------------------------|-----------------------------------------|------------|--------------------------------------------|---------------|--------------------------|
| DYSFUNCTION, VENTRICULAR, LEFT             | 31                                      | 356.9331   | 659                                        | 399.6784      | 0.8931(0.6224-1.2813)    |
| DYSFUNCTION, VENTRICULAR, RIGHT            | 0                                       | 0          | 15                                         | 8.6864        | 0(0-Inf)                 |
| DYSFUNCTION, VESICAL NECK                  | 0                                       | 0          | 4                                          | 1.142         | 0(0-Inf)                 |
| DYSFUNCTION, VESTIBULAR                    | 12                                      | 105.3297   | 123                                        | 49.1          | 2.1452(1.1819-3.8935)    |
| DYSFUNCTION, VOIDING                       | 5                                       | 51.9087    | 144                                        | 75.8323       | 0.6845(0.2802-1.6723)    |
| DYSGENESIS, MESODERMALIS CORNEAE ET IRIDIS | 0                                       | 0          | 1                                          | 0.398         | 0(0-Inf)                 |
| DYSGERMINOMA, MALE (TESTIS#)               | 0                                       | 0          | 2                                          | 0.5458        | 0(0-Inf)                 |
| DYSGEUSIA                                  | 1                                       | 7.8346     | 31                                         | 10.4574       | 0.7492(0.1018-5.5151)    |
| DYSGRAPHIA                                 | 0                                       | 0          | 1                                          | 0.8878        | 0(0-Inf)                 |
| DYSHIDROSIS                                | 2                                       | 15.1377    | 71                                         | 17.2114       | 0.8795(0.2151-3.5963)    |
| DYSKERATOSIS, GINGIVA                      | 0                                       | 0          | 1                                          | 0.4751        | 0(0-Inf)                 |
| DYSKERATOSIS, NOS                          | 3                                       | 22.0184    | 34                                         | 10.4929       | 2.0984(0.6406-6.8736)    |
| DYSKERATOSIS, ORAL, SOFT TISSUE, NEC       | 2                                       | 14.3374    | 59                                         | 14.5575       | 0.9849(0.2398-4.0453)    |
| DYSKINESIA, BILIARY                        | 0                                       | 0          | 5                                          | 1.0833        | 0(0-Inf)                 |
| DYSKINESIA, HEART                          | 0                                       | 0          | 3                                          | 0.8187        | 0(0-Inf)                 |
| DYSKINESIA, NOS                            | 3                                       | 24.6262    | 36                                         | 13.1174       | 1.8774(0.5745-6.135)     |
| DYSKINESIA, ORAL-FACIAL                    | 0                                       | 0          | 8                                          | 3.9272        | 0(0-Inf)                 |
| DYSKINESIA, OROFACIAL LINGUAL              | 0                                       | 0          | 4                                          | 1.9325        | 0(0-Inf)                 |
| DYSKINESIA, TARDIVE                        | 2                                       | 15.4364    | 51                                         | 16.7149       | 0.9235(0.2239-3.8099)    |
| DYSKINESIA, VENTRICLE, LEFT                | 0                                       | 0          | 3                                          | 1.9018        | 0(0-Inf)                 |
| DYSKINESIA, VENTRICLE, RIGHT               | 0                                       | 0          | 2                                          | 1.1623        | 0(0-Inf)                 |
| DYSLEXIA                                   | 0                                       | 0          | 5                                          | 1.9942        | 0(0-Inf)                 |
| DYSLIPIDEMIA                               | 29                                      | 231.8568   | 1053                                       | 371.918       | 0.6234(0.4308-0.9022)    |
| DYSLIPOPOTEINEMIA                          | 0                                       | 0          | 1                                          | 0.8879        | 0(0-Inf)                 |
| DYSMENORRHEA, MILD                         | 0                                       | 0          | 3                                          | 1.5104        | 0(0-Inf)                 |
| DYSMENORRHEA, MODERATE                     | 0                                       | 0          | 1                                          | 0.398         | 0(0-Inf)                 |
| DYSMENORRHEA, NOS                          | 3                                       | 172.3045   | 193                                        | 182.7623      | 0.9428(0.3013-2.9504)    |
| DYSMENORRHEA, PRIMARY                      | 0                                       | 0          | 3                                          | 1.9322        | 0(0-Inf)                 |
| DYSMENORRHEA, SECONDARY                    | 0                                       | 0          | 11                                         | 8.2467        | 0(0-Inf)                 |
| DYSMENORRHEA, SEVERE                       | 0                                       | 0          | 10                                         | 5.2922        | 0(0-Inf)                 |
| DYSMETRIA                                  | 1                                       | 7.7783     | 2                                          | 0.6823        | 11.3997(0.9963-130.4419) |
| DYSOSTOSIS, CRANIOFACIAL                   | 0                                       | 0          | 1                                          | 0.2729        | 0(0-Inf)                 |
| DYSOSTOSIS, MANDIBULOFACIAL                | 0                                       | 0          | 1                                          | 0.8878        | 0(0-Inf)                 |
| DYSPAREUNIA                                | 0                                       | 0          | 135                                        | 62.0299       | 0(0-Inf)                 |
| DYSPEPSIA (FUNCTIONAL)                     | 46                                      | 362.3706   | 1770                                       | 596.4902      | 0.6075(0.4531-0.8146)    |
| DYSPHAGIA                                  | 64                                      | 668.0525   | 1418                                       | 733.949       | 0.9102(0.7081-1.17)      |
| DYSPHASIA, NOS                             | 3                                       | 28.6749    | 78                                         | 36.4435       | 0.7868(0.2477-2.4994)    |
| DYSPHONIA, FUNCTIONAL, (HYSTERICAL)        | 0                                       | 0          | 3                                          | 0.964         | 0(0-Inf)                 |
| DYSPHONIA, NOS                             | 16                                      | 135.0282   | 230                                        | 86.72         | 1.5571(0.936-2.5902)     |
| DYSPHONIA, SPASTIC                         | 4                                       | 30.4359    | 34                                         | 10.8064       | 2.8165(0.991-8.0047)     |

| Description                                                 | No. of Positive Cases with Disease Code | Case Rate* | No. of Positive Controls with Disease Code | Control Rate* | Relative Risk (95%CI)  |
|-------------------------------------------------------------|-----------------------------------------|------------|--------------------------------------------|---------------|------------------------|
| DYSPHORIA                                                   | 6                                       | 46.1738    | 74                                         | 24.0086       | 1.9232(0.833-4.4405)   |
| DYSPLASIA, ACETABULAR, NOS                                  | 0                                       | 0          | 2                                          | 0.7896        | 0(0-Inf)               |
| DYSPLASIA, ALVEOLAR                                         | 0                                       | 0          | 1                                          | 0.2354        | 0(0-Inf)               |
| DYSPLASIA, BLADDER                                          | 1                                       | 14.0583    | 9                                          | 7.1543        | 1.965(0.2472-15.6212)  |
| DYSPLASIA, BREAST                                           | 1                                       | 10.2589    | 5                                          | 1.2056        | 8.5094(0.969-74.7255)  |
| DYSPLASIA, BRONCHUS                                         | 0                                       | 0          | 2                                          | 1.1974        | 0(0-Inf)               |
| DYSPLASIA, CERVIX, FOCAL                                    | 1                                       | 9.2608     | 11                                         | 2.58          | 3.5894(0.4566-28.2163) |
| DYSPLASIA, CERVIX, MILD                                     | 6                                       | 111.8837   | 130                                        | 60.006        | 1.8645(0.8198-4.2405)  |
| DYSPLASIA, CERVIX, MODERATE                                 | 2                                       | 17.3946    | 44                                         | 9.9025        | 1.7566(0.4234-7.2877)  |
| DYSPLASIA, CERVIX, NOS                                      | 1                                       | 15.7204    | 77                                         | 33.5518       | 0.4685(0.065-3.3773)   |
| DYSPLASIA, CERVIX, SEVERE                                   | 1                                       | 8.5345     | 27                                         | 6.0572        | 1.409(0.1902-10.4395)  |
| DYSPLASIA, COLON (NOS & NEC)                                | 50                                      | 425.6839   | 1361                                       | 524.3236      | 0.8119(0.6118-1.0773)  |
| DYSPLASIA, COLORECTAL/RECTOSIGMOID (JUNCTION)               | 2                                       | 16.1576    | 51                                         | 18.3511       | 0.8805(0.2136-3.6286)  |
| DYSPLASIA, CORNEAL (LIMBAL)                                 | 0                                       | 0          | 6                                          | 2.5218        | 0(0-Inf)               |
| DYSPLASIA, ENDOMETRIUM                                      | 0                                       | 0          | 3                                          | 0.6536        | 0(0-Inf)               |
| DYSPLASIA, EPIPHYSIS, MULTIPLE                              | 0                                       | 0          | 1                                          | 0.2729        | 0(0-Inf)               |
| DYSPLASIA, EPITHELIAL, BUCCAL                               | 0                                       | 0          | 7                                          | 2.7957        | 0(0-Inf)               |
| DYSPLASIA, EPITHELIAL, EPIGLOTTIS                           | 0                                       | 0          | 1                                          | 0.2729        | 0(0-Inf)               |
| DYSPLASIA, EPITHELIAL, VOCAL CORD                           | 0                                       | 0          | 9                                          | 3.6633        | 0(0-Inf)               |
| DYSPLASIA, ESOPHAGUS                                        | 4                                       | 33.7276    | 51                                         | 19.7202       | 1.7103(0.6156-4.7515)  |
| DYSPLASIA, EYE, CONGENITAL                                  | 0                                       | 0          | 1                                          | 0.234         | 0(0-Inf)               |
| DYSPLASIA, FIBROMUSCULAR, ARTERY, NEC, SEE ALSO HYPERPLASIA | 0                                       | 0          | 12                                         | 3.3864        | 0(0-Inf)               |
| DYSPLASIA, FIBROMUSCULAR, RENAL ARTERY                      | 0                                       | 0          | 18                                         | 4.2589        | 0(0-Inf)               |
| DYSPLASIA, FIBROUS, BONE                                    | 0                                       | 0          | 11                                         | 2.6927        | 0(0-Inf)               |
| DYSPLASIA, GASTRIC                                          | 2                                       | 21.7834    | 3                                          | 1.7053        | 12.7738(2.0786-78.499) |
| DYSPLASIA, HIP, ACQUIRED, SEE ALSO DEFORMITY                | 0                                       | 0          | 4                                          | 0.9519        | 0(0-Inf)               |
| DYSPLASIA, HIP, NOS, CONGENITAL # (DEVELOPMENTAL)           | 1                                       | 6.9339     | 20                                         | 4.8487        | 1.43(0.1903-10.7482)   |
| DYSPLASIA, LUNG                                             | 0                                       | 0          | 3                                          | 1.1479        | 0(0-Inf)               |
| DYSPLASIA, MYELOID                                          | 0                                       | 0          | 1                                          | 0.4048        | 0(0-Inf)               |
| DYSPLASIA, PERINEUM                                         | 0                                       | 0          | 3                                          | 0.6548        | 0(0-Inf)               |
| DYSPLASIA, PROSTATE                                         | 0                                       | 0          | 3                                          | 1.3876        | 0(0-Inf)               |
| DYSPLASIA, RECTUM                                           | 10                                      | 76.7501    | 340                                        | 112.7871      | 0.6805(0.3624-1.2778)  |
| DYSPLASIA, RETINAL                                          | 0                                       | 0          | 1                                          | 0.8877        | 0(0-Inf)               |
| DYSPLASIA, SKIN NEC/NOS                                     | 0                                       | 0          | 12                                         | 3.968         | 0(0-Inf)               |
| DYSPLASIA, URETER                                           | 0                                       | 0          | 2                                          | 0.7897        | 0(0-Inf)               |
| DYSPLASIA, VAGINA                                           | 4                                       | 61.4826    | 44                                         | 19.0649       | 3.2249(1.1495-9.0472)  |
| DYSPLASIA, VULVAR                                           | 2                                       | 27.8608    | 12                                         | 6.1012        | 4.5665(1.0033-20.7842) |
| DYSPNEA, AT REST, NOS                                       | 0                                       | 0          | 5                                          | 4.733         | 0(0-Inf)               |
| DYSPNEA, FUNCTIONAL                                         | 1                                       | 6.9875     | 15                                         | 3.9855        | 1.7532(0.2294-13.4013) |

| Description                                          | No. of Positive Cases with Disease Code | Case Rate* | No. of Positive Controls with Disease Code | Control Rate* | Relative Risk (95%CI)     |
|------------------------------------------------------|-----------------------------------------|------------|--------------------------------------------|---------------|---------------------------|
| DYSYPNEA, NOCTURNAL, PAROXYSMAL, CAUSE SPECIFIED     | 0                                       | 0          | 2                                          | 1.7059        | 0(0-Inf)                  |
| DYSYPNEA, NOCTURNAL, PAROXYSMAL, NOS                 | 3                                       | 39.4827    | 31                                         | 22.9827       | 1.7179(0.5228-5.6448)     |
| DYSYPNEA, NOS                                        | 81                                      | 883.7655   | 1956                                       | 1079.3984     | 0.8188(0.6553-1.0231)     |
| DYSYPNEA, NOS, CAUSE SPECIFIED                       | 3                                       | 25.9341    | 109                                        | 43.5425       | 0.5956(0.1888-1.8794)     |
| DYSYPNEA, ON EXERTION, CAUSE SPECIFIED               | 2                                       | 19.7907    | 49                                         | 24.2613       | 0.8157(0.1977-3.3657)     |
| DYSYPNEA, ON EXERTION, NOS--DOE                      | 37                                      | 360.9324   | 1159                                       | 546.6964      | 0.6602(0.4756-0.9165)     |
| DYSPRAXIA SPEECH (SEE ALSO APHASIA)                  | 0                                       | 0          | 1                                          | 0.8878        | 0(0-Inf)                  |
| DYSROTEINEMIA                                        | 5                                       | 40.8805    | 2                                          | 0.7354        | 55.5909(10.5453-293.0552) |
| DYSRAPHISM (VERTEBRAL)                               | 0                                       | 0          | 2                                          | 0.432         | 0(0-Inf)                  |
| DYSREFLEXIA                                          | 0                                       | 0          | 2                                          | 0.5474        | 0(0-Inf)                  |
| DYSRHYTHMIA, ATRIAL                                  | 2                                       | 19.2183    | 27                                         | 12.7119       | 1.5118(0.3574-6.3955)     |
| DYSRHYTHMIA, CARDIAC, NOS                            | 16                                      | 153.7228   | 339                                        | 158.2513      | 0.9714(0.5875-1.6061)     |
| DYSRHYTHMIA, CARDIAC, PAROXYSMAL                     | 0                                       | 0          | 10                                         | 2.3169        | 0(0-Inf)                  |
| DYSRHYTHMIA, CARDIAC, VENTRICULAR                    | 3                                       | 23.8656    | 54                                         | 19.1883       | 1.2438(0.3875-3.9921)     |
| DYSRHYTHMIA, CEREBRAL                                | 0                                       | 0          | 1                                          | 0.8275        | 0(0-Inf)                  |
| DYSRHYTHMIA, EXTRASYSTOLE                            | 2                                       | 14.7247    | 28                                         | 6.5557        | 2.2461(0.5307-9.5058)     |
| DYSSYNERGIA, BLADDER SPHINCTER                       | 1                                       | 6.9018     | 5                                          | 1.4122        | 4.8871(0.5616-42.5317)    |
| DYSSYNERGIA, DETRUSOR (ATONY#)                       | 1                                       | 7.3425     | 10                                         | 2.3375        | 3.1412(0.3959-24.9245)    |
| DYSSYNERGIA, SPHINCTER DETRUSOR (ENURESIS#)          | 0                                       | 0          | 3                                          | 1.2106        | 0(0-Inf)                  |
| DYSTOCIA, SHOULDER GIRDLE, COMPLICATING DELIVERY     | 0                                       | 0          | 1                                          | 0.8273        | 0(0-Inf)                  |
| DYSTONIA, FOCAL                                      | 0                                       | 0          | 9                                          | 2.1425        | 0(0-Inf)                  |
| DYSTONIA, NOS (MOVEMENT DISORDER #)                  | 1                                       | 7.6801     | 24                                         | 7.8247        | 0.9815(0.132-7.2999)      |
| DYSTONIA, NOS (HEREDITARY #)                         | 1                                       | 7.2683     | 19                                         | 5.4928        | 1.3232(0.1756-9.9697)     |
| DYSTONIA, OROMANDIBULAR (WITH/WITHOUT BLEPHAROSPASM) | 0                                       | 0          | 2                                          | 0.4708        | 0(0-Inf)                  |
| DYSTROPHY, ANTERIOR MEMBRANE                         | 5                                       | 41.6976    | 148                                        | 55.6199       | 0.7497(0.3068-1.8319)     |
| DYSTROPHY, BASEMENT MEMBRANE                         | 5                                       | 42.4295    | 147                                        | 56.9854       | 0.7446(0.3047-1.8195)     |
| DYSTROPHY, CORNEA ANTERIOR, NEC                      | 0                                       | 0          | 15                                         | 3.8176        | 0(0-Inf)                  |
| DYSTROPHY, CORNEA GRANULAR                           | 0                                       | 0          | 1                                          | 0.2729        | 0(0-Inf)                  |
| DYSTROPHY, CORNEA MACULAR                            | 0                                       | 0          | 1                                          | 0.2354        | 0(0-Inf)                  |
| DYSTROPHY, CORNEA POSTERIOR NEC                      | 0                                       | 0          | 3                                          | 1.5412        | 0(0-Inf)                  |
| DYSTROPHY, CORNEAL                                   | 3                                       | 20.883     | 124                                        | 31.071        | 0.6721(0.2133-2.1178)     |
| DYSTROPHY, CORNEAL, ENDOTHELIAL                      | 1                                       | 7.2591     | 88                                         | 25.4154       | 0.2856(0.0397-2.0543)     |
| DYSTROPHY, CORNEAL, EPITHELIAL                       | 1                                       | 6.94       | 14                                         | 3.6528        | 1.8999(0.2473-14.5966)    |
| DYSTROPHY, CORNEAL, FINGER PRINT                     | 0                                       | 0          | 19                                         | 6.2272        | 0(0-Inf)                  |
| DYSTROPHY, CORNEAL, FUCHS'                           | 1                                       | 7.7867     | 57                                         | 19.0026       | 0.4098(0.0566-2.9678)     |
| DYSTROPHY, FUCHS'                                    | 4                                       | 33.0283    | 182                                        | 67.1635       | 0.4918(0.1823-1.3266)     |
| DYSTROPHY, LANDOUZY-DEJERINE                         | 0                                       | 0          | 1                                          | 0.2354        | 0(0-Inf)                  |
| DYSTROPHY, LIMB-GIRDLE                               | 0                                       | 0          | 4                                          | 1.0949        | 0(0-Inf)                  |
| DYSTROPHY, MUSCULAR, NOS--MD                         | 0                                       | 0          | 11                                         | 2.6718        | 0(0-Inf)                  |
| DYSTROPHY, MUSCULAR, PROGRESSIVE                     | 0                                       | 0          | 1                                          | 0.2354        | 0(0-Inf)                  |

| Description                                    | No. of Positive Cases with Disease Code |            | No. of Positive Controls with Disease Code |               | Relative Risk (95%CI)  |
|------------------------------------------------|-----------------------------------------|------------|--------------------------------------------|---------------|------------------------|
|                                                |                                         | Case Rate* |                                            | Control Rate* |                        |
| DYSTROPHY, MUSCULOSKELETAL (POST-TRAUMA)       | 0                                       | 0          | 2                                          | 0.432         | 0(0-Inf)               |
| DYSTROPHY, MYOTONICA                           | 1                                       | 7.0755     | 7                                          | 1.5821        | 4.4721(0.5376-37.2)    |
| DYSTROPHY, NAIL                                | 27                                      | 264.2214   | 633                                        | 303.2855      | 0.8712(0.5921-1.2817)  |
| DYSTROPHY, OCULAR (MUSCLE)                     | 1                                       | 7.424      | 9                                          | 2.7215        | 2.7279(0.3398-21.8976) |
| DYSTROPHY, OSTEOCHONDRAL                       | 0                                       | 0          | 1                                          | 2.4898        | 0(0-Inf)               |
| DYSTROPHY, REFLEX                              | 0                                       | 0          | 1                                          | 0.3527        | 0(0-Inf)               |
| DYSTROPHY, REFLEX, POST-TRAUMA                 | 0                                       | 0          | 4                                          | 1.0527        | 0(0-Inf)               |
| DYSTROPHY, REFLEX, SYMPATHETIC                 | 1                                       | 6.9409     | 49                                         | 11.6906       | 0.5937(0.0817-4.3157)  |
| DYSTROPHY, RETINAL (HEREDITARY)                | 0                                       | 0          | 2                                          | 0.5069        | 0(0-Inf)               |
| DYSTROPHY, RETINAL PIGMENT-EPITHELIAL          | 0                                       | 0          | 4                                          | 1.1418        | 0(0-Inf)               |
| DYSTROPHY, SALZMANN'S NODULAR                  | 0                                       | 0          | 8                                          | 2.7479        | 0(0-Inf)               |
| DYSTROPHY, SKIN                                | 0                                       | 0          | 3                                          | 0.9608        | 0(0-Inf)               |
| DYSTROPHY, SYMPATHETIC                         | 0                                       | 0          | 8                                          | 1.8478        | 0(0-Inf)               |
| DYSTROPHY, SYMPATHETIC, POST-TRAUMATIC         | 0                                       | 0          | 5                                          | 1.1789        | 0(0-Inf)               |
| DYSTROPHY, UNGUIUM (NAIL), NOS                 | 0                                       | 0          | 1                                          | 0.234         | 0(0-Inf)               |
| DYSTROPHY, UPPER LIMB                          | 0                                       | 0          | 8                                          | 1.829         | 0(0-Inf)               |
| DYSTROPHY, VITELLIFORM                         | 3                                       | 24.8958    | 10                                         | 3.7313        | 6.6722(1.8031-24.6903) |
| DYSTROPHY, VULVA                               | 8                                       | 112.5716   | 141                                        | 63.9591       | 1.7601(0.8601-3.6017)  |
| DYSURIA                                        | 30                                      | 247.4189   | 857                                        | 310.5394      | 0.7967(0.5531-1.1477)  |
| EARACHE                                        | 0                                       | 0          | 47                                         | 10.4945       | 0(0-Inf)               |
| ECCHYMOSIS, DIGESTIVE SYSTEM, NEC/NOS          | 0                                       | 0          | 1                                          | 0.4048        | 0(0-Inf)               |
| ECCHYMOSIS, EYE, TRAUMATIC                     | 1                                       | 8.8256     | 11                                         | 4.545         | 1.9418(0.248-15.2049)  |
| ECCHYMOSIS, EYELID, LATE EFFECT                | 0                                       | 0          | 1                                          | 0.234         | 0(0-Inf)               |
| ECCHYMOSIS, EYELID, TRAUMATIC                  | 1                                       | 7.1288     | 11                                         | 2.6557        | 2.6843(0.342-21.0718)  |
| ECCHYMOSIS, NOS                                | 21                                      | 188.5885   | 496                                        | 208.4646      | 0.9047(0.5838-1.4017)  |
| ECCHYMOSIS, TRAUMATIC, NOS, SEE ALSO CONTUSION | 1                                       | 12.3414    | 22                                         | 14.9057       | 0.828(0.1111-6.1682)   |
| ECTASIA, AORTA, SEE ALSO DILATATION            | 3                                       | 32.5825    | 22                                         | 12.2546       | 2.6588(0.7911-8.9359)  |
| ECTASIA, ARTERY, LOWER EXTREMITY               | 0                                       | 0          | 2                                          | 0.7052        | 0(0-Inf)               |
| ECTASIA, ARTERY, NOS                           | 0                                       | 0          | 9                                          | 4.5354        | 0(0-Inf)               |
| ECTASIA, BASILAR ARTERY                        | 0                                       | 0          | 3                                          | 1.1272        | 0(0-Inf)               |
| ECTASIA, BREAST                                | 4                                       | 67.8464    | 110                                        | 48.9175       | 1.387(0.5097-3.774)    |
| ECTASIA, CAPILLARY                             | 0                                       | 0          | 3                                          | 1.0183        | 0(0-Inf)               |
| ECTASIA, CAROTID ARTERY                        | 0                                       | 0          | 4                                          | 1.9297        | 0(0-Inf)               |
| ECTASIA, CORNEA                                | 0                                       | 0          | 1                                          | 0.2729        | 0(0-Inf)               |
| ECTASIA, FEMORAL ARTERY                        | 0                                       | 0          | 1                                          | 0.888         | 0(0-Inf)               |
| ECTASIA, GASTRIC VASCULAR                      | 1                                       | 11.1938    | 23                                         | 13.6987       | 0.8171(0.1099-6.0781)  |
| ECTASIA, KIDNEY                                | 0                                       | 0          | 1                                          | 0.398         | 0(0-Inf)               |
| ECTASIA, POPLITEAL ARTERY                      | 0                                       | 0          | 5                                          | 1.8567        | 0(0-Inf)               |
| ECTASIA, SALIVARY GLAND                        | 0                                       | 0          | 3                                          | 0.7175        | 0(0-Inf)               |
| ECTASIA, SUBCLAVIAN ARTERY                     | 1                                       | 11.6674    | 0                                          | 0             | 8826547759.5603(0-Inf) |

| Description                                 | No. of Positive Cases with Disease Code | Case Rate* | No. of Positive Controls with Disease Code | Control Rate* | Relative Risk (95%CI)  |
|---------------------------------------------|-----------------------------------------|------------|--------------------------------------------|---------------|------------------------|
| ECTASIA, VENOUS                             | 1                                       | 6.9381     | 52                                         | 12.9209       | 0.537(0.074-3.8979)    |
| ECTASIA, VERTEBRAL ARTERY                   | 0                                       | 0          | 3                                          | 1.0582        | 0(0-Inf)               |
| ECTHYMA, NOS                                | 0                                       | 0          | 2                                          | 0.8102        | 0(0-Inf)               |
| ECTOPIC, BEATS, ATRIAL                      | 0                                       | 0          | 35                                         | 15.2367       | 0(0-Inf)               |
| ECTOPIC, BEATS, NOS, SEE ALSO PREMATURE     | 1                                       | 7.8071     | 44                                         | 14.911        | 0.5236(0.0719-3.8102)  |
| ECTOPIC, GASTRIC MUCOSA, CONGENITAL         | 0                                       | 0          | 1                                          | 0.234         | 0(0-Inf)               |
| ECTOPIC, NAIL                               | 0                                       | 0          | 1                                          | 0.234         | 0(0-Inf)               |
| ECTOPIC, PANCREAS                           | 0                                       | 0          | 3                                          | 1.0581        | 0(0-Inf)               |
| ECTOPIC, SECRETION, ACTH                    | 0                                       | 0          | 2                                          | 0.7896        | 0(0-Inf)               |
| ECTROPION, CERVICAL                         | 1                                       | 54.8322    | 17                                         | 15.3583       | 3.5702(0.4736-26.9116) |
| ECTROPION, LID, CICATRICIAL                 | 1                                       | 13.2535    | 16                                         | 11.9315       | 1.1108(0.1465-8.4198)  |
| ECTROPION, LID, CONGENITAL                  | 1                                       | 17.9431    | 3                                          | 3.3929        | 5.2884(0.5421-51.5937) |
| ECTROPION, LIP, ACQUIRED                    | 0                                       | 0          | 3                                          | 0.7885        | 0(0-Inf)               |
| ECTROPION, LIP, NOS                         | 0                                       | 0          | 1                                          | 1.9084        | 0(0-Inf)               |
| ECTROPION, NOS                              | 8                                       | 118.9672   | 176                                        | 154.9044      | 0.768(0.3777-1.5618)   |
| ECTROPION, PARALYTIC                        | 1                                       | 10.625     | 3                                          | 1.6362        | 6.4938(0.6587-64.0203) |
| ECTROPION, UVEA                             | 0                                       | 0          | 1                                          | 0.234         | 0(0-Inf)               |
| ECZEMA, ATOPIC                              | 1                                       | 7.6966     | 10                                         | 2.3014        | 3.3444(0.4212-26.5532) |
| ECZEMA, DYSHIDROTIC                         | 9                                       | 71.6865    | 176                                        | 42.2651       | 1.6961(0.8656-3.3234)  |
| ECZEMA, INFANTILE, ASTEATOTIC               | 0                                       | 0          | 1                                          | 0.234         | 0(0-Inf)               |
| ECZEMA, NEC, SEE ALSO DERMATITIS ECZEMATOID | 30                                      | 214.4443   | 887                                        | 230.5706      | 0.9301(0.6458-1.3395)  |
| ECZEMA, NUMMULAR                            | 12                                      | 84.0623    | 262                                        | 66.8104       | 1.2582(0.7041-2.2486)  |
| ECZEMA, SEBORRHEIC                          | 0                                       | 0          | 9                                          | 4.1201        | 0(0-Inf)               |
| ECZEMA, STASIS, NOS                         | 0                                       | 0          | 2                                          | 0.4854        | 0(0-Inf)               |
| EDEMA, ALLERGIC                             | 0                                       | 0          | 12                                         | 3.0433        | 0(0-Inf)               |
| EDEMA, ANGIONEUROTIC                        | 1                                       | 9.7664     | 18                                         | 4.8373        | 2.0189(0.2673-15.2512) |
| EDEMA, BRAIN                                | 1                                       | 7.2546     | 8                                          | 2.316         | 3.1325(0.385-25.4892)  |
| EDEMA, CEREBRAL                             | 0                                       | 0          | 1                                          | 0.4048        | 0(0-Inf)               |
| EDEMA, CONJUNCTIVA                          | 0                                       | 0          | 3                                          | 0.7175        | 0(0-Inf)               |
| EDEMA, CORNEA                               | 0                                       | 0          | 47                                         | 20.6419       | 0(0-Inf)               |
| EDEMA, CYCLIC                               | 0                                       | 0          | 29                                         | 16.5          | 0(0-Inf)               |
| EDEMA, DEPENDENT                            | 53                                      | 553.9863   | 921                                        | 479.4185      | 1.1555(0.8753-1.5255)  |
| EDEMA, EYELIDS                              | 4                                       | 28.8191    | 80                                         | 18.4868       | 1.5589(0.5686-4.2738)  |
| EDEMA, FACIAL                               | 2                                       | 15.1236    | 54                                         | 16.9515       | 0.8922(0.2167-3.6739)  |
| EDEMA, GENITAL, FEMALE                      | 0                                       | 0          | 4                                          | 1.6203        | 0(0-Inf)               |
| EDEMA, GENITAL, MALE                        | 0                                       | 0          | 3                                          | 2.6634        | 0(0-Inf)               |
| EDEMA, GLOTTIS                              | 0                                       | 0          | 5                                          | 1.2831        | 0(0-Inf)               |
| EDEMA, IDIOPATHIC                           | 0                                       | 0          | 30                                         | 6.976         | 0(0-Inf)               |
| EDEMA, JOINT                                | 0                                       | 0          | 6                                          | 2.3693        | 0(0-Inf)               |
| EDEMA, LARYNX                               | 1                                       | 7.3298     | 20                                         | 4.6954        | 1.5611(0.2078-11.7291) |



| Description                                              | No. of Positive Cases with Disease Code | Case Rate* | No. of Positive Controls with Disease Code | Control Rate* | Relative Risk (95%CI)    |
|----------------------------------------------------------|-----------------------------------------|------------|--------------------------------------------|---------------|--------------------------|
| EDEMA, LEGS                                              | 106                                     | 1258.296   | 2210                                       | 1357.7279     | 0.9268(0.7623-1.1267)    |
| EDEMA, MACULAR                                           | 13                                      | 105.2501   | 196                                        | 70.2698       | 1.4978(0.8524-2.6319)    |
| EDEMA, MACULAR, CYSTOID                                  | 12                                      | 118.7586   | 127                                        | 61.7117       | 1.9244(1.0616-3.4885)    |
| EDEMA, MALIGNANT                                         | 1                                       | 11.664     | 0                                          | 0             | 8824117536.3051(0-Inf)   |
| EDEMA, NOS (FOR INTERNAL ORGAN/SITE CODE DISEASE)        | 48                                      | 499.0693   | 957                                        | 502.425       | 0.9933(0.7427-1.3285)    |
| EDEMA, NOS, WITH HYPERTENSION OF PREGNANCY               | 0                                       | 0          | 1                                          | 0.4048        | 0(0-Inf)                 |
| EDEMA, ORBIT                                             | 0                                       | 0          | 2                                          | 0.4709        | 0(0-Inf)                 |
| EDEMA, ORTHOSTATIC                                       | 1                                       | 6.9588     | 8                                          | 1.9979        | 3.4831(0.427-28.4106)    |
| EDEMA, PENIS                                             | 0                                       | 0          | 6                                          | 4.4943        | 0(0-Inf)                 |
| EDEMA, PERIODIC                                          | 0                                       | 0          | 3                                          | 2.4845        | 0(0-Inf)                 |
| EDEMA, PERIORBITAL                                       | 0                                       | 0          | 56                                         | 12.9616       | 0(0-Inf)                 |
| EDEMA, PERIPHERAL                                        | 23                                      | 290.9686   | 494                                        | 348.3081      | 0.8354(0.5494-1.2701)    |
| EDEMA, PHARYNX                                           | 1                                       | 7.3254     | 2                                          | 0.6442        | 11.3713(1.0019-129.0637) |
| EDEMA, POST-PHLEBITIC                                    | 0                                       | 0          | 12                                         | 3.67          | 0(0-Inf)                 |
| EDEMA, PREMENSTRUAL                                      | 0                                       | 0          | 17                                         | 19.8242       | 0(0-Inf)                 |
| EDEMA, PULMONARY, ACUTE                                  | 2                                       | 23.1588    | 34                                         | 21.1523       | 1.0949(0.262-4.5758)     |
| EDEMA, PULMONARY, ACUTE, WITH HEART DISEASE              | 0                                       | 0          | 15                                         | 4.6456        | 0(0-Inf)                 |
| EDEMA, PULMONARY, CARDIAC                                | 0                                       | 0          | 7                                          | 2.3466        | 0(0-Inf)                 |
| EDEMA, PULMONARY, NON-CARDIAC                            | 0                                       | 0          | 1                                          | 0.8877        | 0(0-Inf)                 |
| EDEMA, PULMONARY, NOS                                    | 13                                      | 173.6589   | 191                                        | 145.3145      | 1.1951(0.6803-2.0992)    |
| EDEMA, RETINAL                                           | 0                                       | 0          | 10                                         | 3.7224        | 0(0-Inf)                 |
| EDEMA, RETINAL DISC                                      | 0                                       | 0          | 6                                          | 1.4657        | 0(0-Inf)                 |
| EDEMA, SALT                                              | 0                                       | 0          | 6                                          | 1.5883        | 0(0-Inf)                 |
| EDEMA, SCROTUM                                           | 1                                       | 30.1917    | 16                                         | 27.9581       | 1.0799(0.1427-8.1743)    |
| EDEMA, STASIS                                            | 5                                       | 52.7444    | 163                                        | 88.7981       | 0.594(0.2436-1.4485)     |
| EDEMA, SUBGLOTTIC                                        | 0                                       | 0          | 2                                          | 1.0782        | 0(0-Inf)                 |
| EDEMA, TESTIS                                            | 0                                       | 0          | 2                                          | 0.5458        | 0(0-Inf)                 |
| EDEMA, VULVA                                             | 0                                       | 0          | 2                                          | 0.4709        | 0(0-Inf)                 |
| EDENTULOUS, COMPLETE                                     | 22                                      | 167.4918   | 332                                        | 101.9927      | 1.6422(1.0645-2.5334)    |
| EDENTULOUS, NOS                                          | 15                                      | 123.3956   | 346                                        | 126.4563      | 0.9758(0.581-1.6388)     |
| EDENTULOUS, PARTIAL                                      | 34                                      | 254.7581   | 1056                                       | 319.7999      | 0.7966(0.5657-1.1218)    |
| EDUCATION HEALTH                                         | 4                                       | 32.4246    | 38                                         | 13.7835       | 2.3524(0.8345-6.631)     |
| EFFECT, ADVERSE, G.I. DRUGS (MISCELLANEOUS)              | 1                                       | 11.3647    | 8                                          | 4.8797        | 2.329(0.2879-18.8398)    |
| EFFECT, ADVERSE, EXCESSIVE EXERTION (PHYSICAL OR MENTAL) | 3                                       | 21.899     | 36                                         | 10.7757       | 2.0323(0.622-6.6401)     |
| EFFECT, ADVERSE, ACETAMINOPHEN                           | 0                                       | 0          | 8                                          | 3.5406        | 0(0-Inf)                 |
| EFFECT, ADVERSE, ACETYLSALICYLIC ACID/ASA                | 0                                       | 0          | 2                                          | 1.0785        | 0(0-Inf)                 |
| EFFECT, ADVERSE, ACID, NEC                               | 0                                       | 0          | 5                                          | 1.2019        | 0(0-Inf)                 |
| EFFECT, ADVERSE, ACIDIFYING AGENT                        | 0                                       | 0          | 1                                          | 0.234         | 0(0-Inf)                 |
| EFFECT, ADVERSE, ADRENALIN                               | 0                                       | 0          | 1                                          | 0.4049        | 0(0-Inf)                 |

| Description                                                      | No. of Positive Cases with Disease Code | Case Rate* | No. of Positive Controls with Disease Code | Control Rate* | Relative Risk (95%CI)    |
|------------------------------------------------------------------|-----------------------------------------|------------|--------------------------------------------|---------------|--------------------------|
| EFFECT, ADVERSE, ALCOHOL, NOS (ETHYL)                            | 1                                       | 7.7103     | 30                                         | 10.1887       | 0.7568(0.1028-5.5692)    |
| EFFECT, ADVERSE, ALCOHOL, NOS (NON ETHYL)                        | 1                                       | 9.1815     | 6                                          | 1.7135        | 5.3583(0.6342-45.2675)   |
| EFFECT, ADVERSE, ALCOHOL, RUBBING                                | 0                                       | 0          | 1                                          | 0.2729        | 0(0-Inf)                 |
| EFFECT, ADVERSE, ALCOHOL, WITH ANTABUSE                          | 0                                       | 0          | 1                                          | 0.2729        | 0(0-Inf)                 |
| EFFECT, ADVERSE, ALDOMET                                         | 0                                       | 0          | 9                                          | 2.8006        | 0(0-Inf)                 |
| EFFECT, ADVERSE, ALKALINIZING AGENT                              | 0                                       | 0          | 2                                          | 0.6775        | 0(0-Inf)                 |
| EFFECT, ADVERSE, AMIODARONE                                      | 1                                       | 10.9171    | 59                                         | 33.4887       | 0.326(0.0451-2.3568)     |
| EFFECT, ADVERSE, AMPHETAMINE                                     | 1                                       | 10.121     | 0                                          | 0             | 14230673109.5158(0-Inf)  |
| EFFECT, ADVERSE, AMPICILLIN                                      | 2                                       | 17.2088    | 29                                         | 6.7422        | 2.5524(0.604-10.7855)    |
| EFFECT, ADVERSE, ANALGESIC, NEC                                  | 4                                       | 29.8587    | 72                                         | 21.9352       | 1.3612(0.4952-3.7416)    |
| EFFECT, ADVERSE, ANALGESIC, WITH BARBITURATE                     | 1                                       | 9.5616     | 1                                          | 0.493         | 19.3949(1.1516-326.6545) |
| EFFECT, ADVERSE, ANDROGEN                                        | 1                                       | 7.0319     | 4                                          | 1.0517        | 6.6865(0.7231-61.8273)   |
| EFFECT, ADVERSE, ANESTHESIA, GAS                                 | 0                                       | 0          | 3                                          | 1.0583        | 0(0-Inf)                 |
| EFFECT, ADVERSE, ANESTHESIA, LOCAL                               | 1                                       | 7.5239     | 11                                         | 3.4286        | 2.1944(0.2797-17.2183)   |
| EFFECT, ADVERSE, ANTACID                                         | 1                                       | 6.9771     | 26                                         | 6.6921        | 1.0426(0.1406-7.7325)    |
| EFFECT, ADVERSE, ANTIBIOTIC, NOS                                 | 11                                      | 78.5887    | 259                                        | 70.0739       | 1.1215(0.6122-2.0547)    |
| EFFECT, ADVERSE, ANTICANCER AGENT                                | 0                                       | 0          | 4                                          | 1.0274        | 0(0-Inf)                 |
| EFFECT, ADVERSE, ANTICHOLINERGICS, WITH SEDATIVE OR TRANQUILIZER | 0                                       | 0          | 4                                          | 1.1698        | 0(0-Inf)                 |
| EFFECT, ADVERSE, ANTICOAGULANT                                   | 7                                       | 69.6927    | 91                                         | 45.2223       | 1.5411(0.7121-3.3351)    |
| EFFECT, ADVERSE, ANTICONVULSANT, NEC                             | 1                                       | 7.1595     | 47                                         | 13.2401       | 0.5407(0.0744-3.9325)    |
| EFFECT, ADVERSE, ANTIDEPRESSANT                                  | 3                                       | 21.3077    | 104                                        | 28.4452       | 0.7491(0.237-2.3672)     |
| EFFECT, ADVERSE, ANTIDEPRESSANT, WITH TRANQUILIZER               | 0                                       | 0          | 1                                          | 0.398         | 0(0-Inf)                 |
| EFFECT, ADVERSE, ANTIDIABETIC AGENT                              | 2                                       | 20.6024    | 40                                         | 20.9023       | 0.9857(0.2373-4.094)     |
| EFFECT, ADVERSE, ANTIDIARRHEAL AGENT                             | 1                                       | 7.7085     | 7                                          | 2.2829        | 3.3767(0.4075-27.9803)   |
| EFFECT, ADVERSE, ANTIEMETIC AGENT                                | 0                                       | 0          | 4                                          | 1.6208        | 0(0-Inf)                 |
| EFFECT, ADVERSE, ANTIFUNGAL                                      | 0                                       | 0          | 14                                         | 4.224         | 0(0-Inf)                 |
| EFFECT, ADVERSE, ANTIHISTAMINE                                   | 2                                       | 13.9616    | 23                                         | 5.5659        | 2.5084(0.5858-10.7411)   |
| EFFECT, ADVERSE, ANTIHYPERLIPIDEMIC                              | 1                                       | 7.1435     | 28                                         | 7.7533        | 0.9214(0.1246-6.8125)    |
| EFFECT, ADVERSE, ANTI-INFECTIVE, NEC                             | 8                                       | 56.7449    | 266                                        | 70.755        | 0.802(0.3962-1.6233)     |
| EFFECT, ADVERSE, ANTINEOPLASTIC AGENT                            | 8                                       | 61.4776    | 164                                        | 53.3739       | 1.1518(0.5651-2.3479)    |
| EFFECT, ADVERSE, ANTI-REJECTION AGENT                            | 1                                       | 8.6096     | 2                                          | 0.8261        | 10.4215(0.9202-118.0216) |
| EFFECT, ADVERSE, ANTITHYROID DERIVATIVE                          | 0                                       | 0          | 3                                          | 0.7175        | 0(0-Inf)                 |
| EFFECT, ADVERSE, ANTIVIRAL DRUG                                  | 1                                       | 9.1331     | 4                                          | 1.7585        | 5.1937(0.5659-47.6667)   |
| EFFECT, ADVERSE, ASPIRIN                                         | 3                                       | 21.4448    | 124                                        | 34.6063       | 0.6197(0.1967-1.9522)    |
| EFFECT, ADVERSE, ATROPINE                                        | 0                                       | 0          | 2                                          | 1.1972        | 0(0-Inf)                 |
| EFFECT, ADVERSE, AZT                                             | 0                                       | 0          | 1                                          | 0.2729        | 0(0-Inf)                 |
| EFFECT, ADVERSE, BAKING SODA                                     | 0                                       | 0          | 1                                          | 0.8879        | 0(0-Inf)                 |
| EFFECT, ADVERSE, BARBITURATE                                     | 1                                       | 17.0171    | 2                                          | 0.7246        | 23.4845(2.056-268.2498)  |
| EFFECT, ADVERSE, BENADRYL                                        | 0                                       | 0          | 5                                          | 1.2651        | 0(0-Inf)                 |

| Description                                              | No. of Positive Cases with Disease Code | Case Rate* | No. of Positive Controls with Disease Code | Control Rate* | Relative Risk (95%CI)    |
|----------------------------------------------------------|-----------------------------------------|------------|--------------------------------------------|---------------|--------------------------|
| EFFECT, ADVERSE, BENZENE                                 | 0                                       | 0          | 1                                          | 0.398         | 0(0-Inf)                 |
| EFFECT, ADVERSE, BERYLLIUM COMPOUND                      | 0                                       | 0          | 1                                          | 0.2354        | 0(0-Inf)                 |
| EFFECT, ADVERSE, BETA-BLOCKER                            | 2                                       | 20.004     | 82                                         | 41.1306       | 0.4864(0.1194-1.9817)    |
| EFFECT, ADVERSE, BRONCHODILATOR                          | 0                                       | 0          | 9                                          | 2.5596        | 0(0-Inf)                 |
| EFFECT, ADVERSE, CAFERGOT                                | 0                                       | 0          | 3                                          | 0.6536        | 0(0-Inf)                 |
| EFFECT, ADVERSE, CAFFEINE                                | 5                                       | 49.7283    | 122                                        | 34.1355       | 1.4568(0.5941-3.5723)    |
| EFFECT, ADVERSE, CALCIUM (SALTS), NOS                    | 0                                       | 0          | 5                                          | 1.7338        | 0(0-Inf)                 |
| EFFECT, ADVERSE, CALORIC AGENT, NEC                      | 1                                       | 24.9866    | 0                                          | 0             | 38650335935.987(0-Inf)   |
| EFFECT, ADVERSE, CARBON MONOXIDE                         | 1                                       | 9.6973     | 10                                         | 2.7929        | 3.4721(0.4387-27.479)    |
| EFFECT, ADVERSE, CARDIAC DEPRESSANT                      | 1                                       | 7.8174     | 83                                         | 27.9773       | 0.2794(0.0388-2.0107)    |
| EFFECT, ADVERSE, CARDIAC DRUG, NEC/NOS                   | 0                                       | 0          | 71                                         | 31.6213       | 0(0-Inf)                 |
| EFFECT, ADVERSE, CARDIAC TONIC                           | 0                                       | 0          | 7                                          | 2.4586        | 0(0-Inf)                 |
| EFFECT, ADVERSE, CATHARTIC IRRITANT                      | 0                                       | 0          | 2                                          | 0.5069        | 0(0-Inf)                 |
| EFFECT, ADVERSE, CATHARTIC SALINE                        | 0                                       | 0          | 1                                          | 0.2354        | 0(0-Inf)                 |
| EFFECT, ADVERSE, CATHARTIC, NEC                          | 0                                       | 0          | 4                                          | 0.952         | 0(0-Inf)                 |
| EFFECT, ADVERSE, CENTRAL NERVOUS SYSTEM, MUSCLE RELAXANT | 0                                       | 0          | 1                                          | 0.4048        | 0(0-Inf)                 |
| EFFECT, ADVERSE, CHEMICAL SUBSTANCE, NEC                 | 3                                       | 21.3684    | 86                                         | 21.4171       | 0.9977(0.3146-3.1638)    |
| EFFECT, ADVERSE, CHLORINE RELEASING AGENT                | 0                                       | 0          | 1                                          | 0.398         | 0(0-Inf)                 |
| EFFECT, ADVERSE, CHOLESTEROL-LOWERING AGENT              | 1                                       | 7.5663     | 101                                        | 32.2483       | 0.2346(0.0327-1.6843)    |
| EFFECT, ADVERSE, CIMETIDINE                              | 0                                       | 0          | 1                                          | 0.3526        | 0(0-Inf)                 |
| EFFECT, ADVERSE, COAGULANT, NEC                          | 0                                       | 0          | 2                                          | 1.1615        | 0(0-Inf)                 |
| EFFECT, ADVERSE, COAL TAR                                | 0                                       | 0          | 2                                          | 0.4709        | 0(0-Inf)                 |
| EFFECT, ADVERSE, CODEINE                                 | 2                                       | 14.1968    | 31                                         | 8.4435        | 1.6814(0.3994-7.0776)    |
| EFFECT, ADVERSE, COLCHICINE                              | 0                                       | 0          | 5                                          | 2.5962        | 0(0-Inf)                 |
| EFFECT, ADVERSE, COLD, NEC                               | 1                                       | 7.0853     | 11                                         | 3.1458        | 2.2523(0.2875-17.6435)   |
| EFFECT, ADVERSE, COMPAZINE                               | 0                                       | 0          | 8                                          | 1.8763        | 0(0-Inf)                 |
| EFFECT, ADVERSE, CORTICOSTEROID                          | 2                                       | 15.7983    | 29                                         | 9.9318        | 1.5907(0.377-6.7111)     |
| EFFECT, ADVERSE, COUGH MIXTURE                           | 0                                       | 0          | 7                                          | 1.8255        | 0(0-Inf)                 |
| EFFECT, ADVERSE, COUMADIN                                | 2                                       | 20.8474    | 47                                         | 24.9399       | 0.8359(0.2024-3.4516)    |
| EFFECT, ADVERSE, CYCLOPHOSPHAMIDE                        | 0                                       | 0          | 2                                          | 1.0784        | 0(0-Inf)                 |
| EFFECT, ADVERSE, CYCLOSPORINE                            | 2                                       | 13.8354    | 8                                          | 2.0866        | 6.6306(1.3844-31.7581)   |
| EFFECT, ADVERSE, CYTOXAN                                 | 2                                       | 15.2909    | 1                                          | 0.231         | 66.1908(5.7147-766.6613) |
| EFFECT, ADVERSE, DARVON                                  | 0                                       | 0          | 8                                          | 3.1604        | 0(0-Inf)                 |
| EFFECT, ADVERSE, DEMEROL                                 | 0                                       | 0          | 2                                          | 0.4854        | 0(0-Inf)                 |
| EFFECT, ADVERSE, DEPRESSANT, CNS, NEC                    | 0                                       | 0          | 3                                          | 1.2156        | 0(0-Inf)                 |
| EFFECT, ADVERSE, DIAGNOSTIC AGENT, BARIUM                | 2                                       | 13.8849    | 4                                          | 1.0502        | 13.2214(2.354-74.2571)   |
| EFFECT, ADVERSE, DIAGNOSTIC AGENT, INJECTABLE            | 3                                       | 20.9246    | 38                                         | 9.8902        | 2.1157(0.6487-6.9006)    |
| EFFECT, ADVERSE, DIAGNOSTIC AGENT, OTHER                 | 0                                       | 0          | 6                                          | 1.5147        | 0(0-Inf)                 |
| EFFECT, ADVERSE, DIGESTANT                               | 0                                       | 0          | 3                                          | 1.2106        | 0(0-Inf)                 |

| Description                                                        | No. of Positive Cases with Disease Code | Case Rate* | No. of Positive Controls with Disease Code | Control Rate* | Relative Risk (95%CI)    |
|--------------------------------------------------------------------|-----------------------------------------|------------|--------------------------------------------|---------------|--------------------------|
| EFFECT, ADVERSE, DIGITALIS                                         | 1                                       | 13.0408    | 18                                         | 13.1656       | 0.9905(0.1316-7.4547)    |
| EFFECT, ADVERSE, DIGITOXIN                                         | 0                                       | 0          | 1                                          | 0.8877        | 0(0-Inf)                 |
| EFFECT, ADVERSE, DIGOXIN                                           | 6                                       | 80.0009    | 73                                         | 55.687        | 1.4366(0.6232-3.3117)    |
| EFFECT, ADVERSE, DILANTIN                                          | 0                                       | 0          | 61                                         | 17.0847       | 0(0-Inf)                 |
| EFFECT, ADVERSE, DILTIAZEM                                         | 3                                       | 31.7133    | 17                                         | 9.3443        | 3.3939(0.9851-11.693)    |
| EFFECT, ADVERSE, DISINFECTANT, NEC                                 | 0                                       | 0          | 4                                          | 0.8841        | 0(0-Inf)                 |
| EFFECT, ADVERSE, DIURETIC, NEC                                     | 7                                       | 58.0055    | 221                                        | 81.7089       | 0.7099(0.3339-1.5092)    |
| EFFECT, ADVERSE, DIURETIC, NEC, CARBONIC ACID ANHYDRASE INHIBITORS | 0                                       | 0          | 2                                          | 0.81          | 0(0-Inf)                 |
| EFFECT, ADVERSE, DIURETIC, WITH HYPOTENSIVE AGENT                  | 2                                       | 14.3884    | 84                                         | 23.7572       | 0.6056(0.1486-2.4686)    |
| EFFECT, ADVERSE, DRUG, NOS                                         | 24                                      | 199.6364   | 590                                        | 218.1353      | 0.9152(0.6078-1.378)     |
| EFFECT, ADVERSE, DRUG, SPECIFIED TYPE, NEC                         | 11                                      | 90.1217    | 171                                        | 62.0542       | 1.4523(0.7874-2.6788)    |
| EFFECT, ADVERSE, DYE, PHARMACEUTICAL                               | 0                                       | 0          | 4                                          | 1.0119        | 0(0-Inf)                 |
| EFFECT, ADVERSE, ELECTRIC CURRENT                                  | 0                                       | 0          | 2                                          | 0.4681        | 0(0-Inf)                 |
| EFFECT, ADVERSE, ELECTROLYTE, NEC                                  | 0                                       | 0          | 4                                          | 1.9684        | 0(0-Inf)                 |
| EFFECT, ADVERSE, ENEMA                                             | 0                                       | 0          | 4                                          | 3.0061        | 0(0-Inf)                 |
| EFFECT, ADVERSE, ENZYME                                            | 0                                       | 0          | 1                                          | 0.2729        | 0(0-Inf)                 |
| EFFECT, ADVERSE, ERGOT                                             | 0                                       | 0          | 3                                          | 0.8035        | 0(0-Inf)                 |
| EFFECT, ADVERSE, ERYTHROMYCIN                                      | 6                                       | 42.1752    | 66                                         | 15.4097       | 2.7369(1.1794-6.3516)    |
| EFFECT, ADVERSE, ESTROGEN                                          | 6                                       | 93.8848    | 121                                        | 52.6666       | 1.7826(0.7824-4.0616)    |
| EFFECT, ADVERSE, ESTROGEN PATCH                                    | 0                                       | 0          | 1                                          | 0.2354        | 0(0-Inf)                 |
| EFFECT, ADVERSE, ETHANOL (ACUTE EPISODE)                           | 1                                       | 7.7796     | 27                                         | 7.0052        | 1.1105(0.1502-8.2094)    |
| EFFECT, ADVERSE, ETHYL ALCOHOL                                     | 1                                       | 8.8506     | 1                                          | 0.2902        | 30.4931(1.8371-506.1377) |
| EFFECT, ADVERSE, EXPECTORANT                                       | 0                                       | 0          | 1                                          | 0.4048        | 0(0-Inf)                 |
| EFFECT, ADVERSE, EXTERNAL CAUSE, NOS                               | 0                                       | 0          | 2                                          | 0.5908        | 0(0-Inf)                 |
| EFFECT, ADVERSE, EXTERNAL MEDICATION, NEC                          | 1                                       | 7.4619     | 22                                         | 6.8106        | 1.0956(0.1467-8.1819)    |
| EFFECT, ADVERSE, EYE, EAR, NOSE, AND THROAT PREPARATION            | 1                                       | 7.0102     | 33                                         | 8.882         | 0.7893(0.1074-5.7978)    |
| EFFECT, ADVERSE, FOOD                                              | 1                                       | 6.957      | 24                                         | 5.7468        | 1.2106(0.1626-9.0133)    |
| EFFECT, ADVERSE, FORMALDEHYDE (GAS OR VAPOR)                       | 0                                       | 0          | 5                                          | 1.2803        | 0(0-Inf)                 |
| EFFECT, ADVERSE, GAS, ANESTHETIC, GENERAL                          | 0                                       | 0          | 3                                          | 0.7175        | 0(0-Inf)                 |
| EFFECT, ADVERSE, GAS, SPECIFIED SOURCE, NOS                        | 0                                       | 0          | 6                                          | 1.4822        | 0(0-Inf)                 |
| EFFECT, ADVERSE, GASOLINE                                          | 1                                       | 21.8625    | 1                                          | 0.5259        | 41.5743(2.52-685.8797)   |
| EFFECT, ADVERSE, GOLD COMPOUND                                     | 1                                       | 9.5117     | 12                                         | 3.2962        | 2.8856(0.371-22.4445)    |
| EFFECT, ADVERSE, HALOTHANE                                         | 0                                       | 0          | 1                                          | 0.234         | 0(0-Inf)                 |
| EFFECT, ADVERSE, HEAVY METAL                                       | 0                                       | 0          | 3                                          | 0.871         | 0(0-Inf)                 |
| EFFECT, ADVERSE, HEPARIN                                           | 2                                       | 22.4657    | 19                                         | 11.3366       | 1.9817(0.4583-8.5686)    |
| EFFECT, ADVERSE, HIGH ALTITUDE, NOS                                | 0                                       | 0          | 6                                          | 3.0219        | 0(0-Inf)                 |
| EFFECT, ADVERSE, HIGH ALTITUDE, ON EARS                            | 0                                       | 0          | 3                                          | 1.0729        | 0(0-Inf)                 |
| EFFECT, ADVERSE, HIGH ALTITUDE, ON SINUSES                         | 1                                       | 6.8976     | 0                                          | 0             | 12248237988.3806(0-Inf)  |
| EFFECT, ADVERSE, HORMONE, SYNTHETIC SUBSTITUTE, NEC                | 3                                       | 20.803     | 92                                         | 21.5367       | 0.9659(0.3048-3.0612)    |

| Description                                                                         | No. of Positive Cases with Disease Code | Case Rate* | No. of Positive Controls with Disease Code | Control Rate* | Relative Risk (95%CI)  |
|-------------------------------------------------------------------------------------|-----------------------------------------|------------|--------------------------------------------|---------------|------------------------|
| EFFECT, ADVERSE, HYDANTOIN DERIVATIVE                                               | 0                                       | 0          | 12                                         | 5.3339        | 0(0-Inf)               |
| EFFECT, ADVERSE, HYDRALAZINE                                                        | 0                                       | 0          | 3                                          | 0.741         | 0(0-Inf)               |
| EFFECT, ADVERSE, HYDROXYCHLOROQUINE                                                 | 1                                       | 6.9395     | 7                                          | 1.7589        | 3.9453(0.4756-32.7306) |
| EFFECT, ADVERSE, HYPNOTICS, NEC                                                     | 0                                       | 0          | 9                                          | 2.6647        | 0(0-Inf)               |
| EFFECT, ADVERSE, HYPOTENSIVE AGENT, NEC                                             | 15                                      | 120.351    | 287                                        | 100.2717      | 1.2002(0.7129-2.0208)  |
| EFFECT, ADVERSE, IMMUNIZATION, NEC                                                  | 1                                       | 7.0894     | 73                                         | 16.7521       | 0.4232(0.0587-3.0529)  |
| EFFECT, ADVERSE, IMMUNOTHERAPY                                                      | 1                                       | 7.0638     | 18                                         | 4.9915        | 1.4151(0.1874-10.6856) |
| EFFECT, ADVERSE, INDERAL                                                            | 1                                       | 7.3448     | 18                                         | 4.4485        | 1.6511(0.2187-12.466)  |
| EFFECT, ADVERSE, INDOCIN                                                            | 0                                       | 0          | 12                                         | 4.3328        | 0(0-Inf)               |
| EFFECT, ADVERSE, INSECTICIDE                                                        | 0                                       | 0          | 4                                          | 0.9671        | 0(0-Inf)               |
| EFFECT, ADVERSE, INSULIN                                                            | 1                                       | 6.9301     | 48                                         | 12.129        | 0.5714(0.0786-4.1534)  |
| EFFECT, ADVERSE, IRON COMPOUND                                                      | 1                                       | 6.9472     | 19                                         | 4.7725        | 1.4557(0.1931-10.975)  |
| EFFECT, ADVERSE, LASIX                                                              | 2                                       | 25.1678    | 16                                         | 11.3192       | 2.2235(0.5075-9.7418)  |
| EFFECT, ADVERSE, LAXATIVE, NEC                                                      | 1                                       | 8.3538     | 24                                         | 9.091         | 0.9189(0.1236-6.8327)  |
| EFFECT, ADVERSE, LEAD                                                               | 0                                       | 0          | 2                                          | 0.6775        | 0(0-Inf)               |
| EFFECT, ADVERSE, LIBRIUM                                                            | 0                                       | 0          | 2                                          | 0.5838        | 0(0-Inf)               |
| EFFECT, ADVERSE, LIGHTNING                                                          | 0                                       | 0          | 1                                          | 0.4048        | 0(0-Inf)               |
| EFFECT, ADVERSE, LINIMENT                                                           | 0                                       | 0          | 1                                          | 0.398         | 0(0-Inf)               |
| EFFECT, ADVERSE, LIQUID NITROGEN (N2O4)                                             | 0                                       | 0          | 2                                          | 0.4853        | 0(0-Inf)               |
| EFFECT, ADVERSE, LOTION                                                             | 0                                       | 0          | 3                                          | 0.741         | 0(0-Inf)               |
| EFFECT, ADVERSE, LYE                                                                | 0                                       | 0          | 1                                          | 0.2729        | 0(0-Inf)               |
| EFFECT, ADVERSE, MEDICATION PATCH, NEC/NOS                                          | 1                                       | 12.5256    | 6                                          | 4.1251        | 3.0364(0.3609-25.544)  |
| EFFECT, ADVERSE, MERCUROCHROME                                                      | 0                                       | 0          | 1                                          | 0.2729        | 0(0-Inf)               |
| EFFECT, ADVERSE, MERCURY                                                            | 0                                       | 0          | 2                                          | 0.8723        | 0(0-Inf)               |
| EFFECT, ADVERSE, METHOTREXATE                                                       | 0                                       | 0          | 12                                         | 4.348         | 0(0-Inf)               |
| EFFECT, ADVERSE, MONOSODIUM GLUTAMATE (MSG)                                         | 0                                       | 0          | 1                                          | 0.2354        | 0(0-Inf)               |
| EFFECT, ADVERSE, MORPHINE                                                           | 1                                       | 11.3694    | 10                                         | 6.0852        | 1.8684(0.2369-14.7347) |
| EFFECT, ADVERSE, MOTION                                                             | 0                                       | 0          | 1                                          | 0.398         | 0(0-Inf)               |
| EFFECT, ADVERSE, MUSCLE RELAXANT/STIMULANT NEC                                      | 1                                       | 9.5466     | 9                                          | 4.2163        | 2.2642(0.2838-18.063)  |
| EFFECT, ADVERSE, NADOLOL                                                            | 0                                       | 0          | 1                                          | 0.8541        | 0(0-Inf)               |
| EFFECT, ADVERSE, NARCOTIC                                                           | 2                                       | 23.3671    | 53                                         | 33.4533       | 0.6985(0.1698-2.8739)  |
| EFFECT, ADVERSE, NARCOTIC ANTAGONIST                                                | 0                                       | 0          | 1                                          | 0.3526        | 0(0-Inf)               |
| EFFECT, ADVERSE, NICOTINE PATCH                                                     | 0                                       | 0          | 9                                          | 2.0502        | 0(0-Inf)               |
| EFFECT, ADVERSE, NON-MEDICINAL SUBSTANCE, NEC (INCLUDE HERBAL/HOMEOPATHIC/EXTRACTS) | 0                                       | 0          | 3                                          | 3.851         | 0(0-Inf)               |
| EFFECT, ADVERSE, NORPACE                                                            | 0                                       | 0          | 2                                          | 0.5909        | 0(0-Inf)               |
| EFFECT, ADVERSE, NOXIOUS MUSHROOM                                                   | 0                                       | 0          | 1                                          | 0.4751        | 0(0-Inf)               |
| EFFECT, ADVERSE, NSAID (NON-STEROIDAL ANTIINFLAMMATORY)                             | 16                                      | 129.8433   | 272                                        | 96.4398       | 1.3464(0.8115-2.2338)  |
| EFFECT, ADVERSE, OINTMENT                                                           | 0                                       | 0          | 2                                          | 1.1615        | 0(0-Inf)               |

| Description                                          | No. of Positive Cases with Disease Code | Case Rate* | No. of Positive Controls with Disease Code | Control Rate* | Relative Risk (95%CI)    |
|------------------------------------------------------|-----------------------------------------|------------|--------------------------------------------|---------------|--------------------------|
| EFFECT, ADVERSE, OPIATE AGONISTS, NEC                | 0                                       | 0          | 14                                         | 8.275         | 0(0-Inf)                 |
| EFFECT, ADVERSE, OPIATE, OPIOID, OPIUM, WITH ALCOHOL | 0                                       | 0          | 4                                          | 1.1698        | 0(0-Inf)                 |
| EFFECT, ADVERSE, OPIATE, WITH BARBITURATE            | 0                                       | 0          | 1                                          | 0.398         | 0(0-Inf)                 |
| EFFECT, ADVERSE, OPIATE/OPIUM                        | 2                                       | 20.6298    | 10                                         | 5.2282        | 3.9459(0.8538-18.2371)   |
| EFFECT, ADVERSE, ORAL CONTRACEPTIVE                  | 0                                       | 0          | 10                                         | 4.9243        | 0(0-Inf)                 |
| EFFECT, ADVERSE, PAINT SOLVENT                       | 0                                       | 0          | 1                                          | 0.4751        | 0(0-Inf)                 |
| EFFECT, ADVERSE, PAINT, NEC                          | 0                                       | 0          | 1                                          | 0.398         | 0(0-Inf)                 |
| EFFECT, ADVERSE, PARASYMPATHOLYTICS                  | 0                                       | 0          | 8                                          | 1.9745        | 0(0-Inf)                 |
| EFFECT, ADVERSE, PARASYMPATHOMIMETICS                | 0                                       | 0          | 10                                         | 5.0903        | 0(0-Inf)                 |
| EFFECT, ADVERSE, PENICILLIN                          | 6                                       | 42.1811    | 68                                         | 17.7021       | 2.3828(1.0283-5.5214)    |
| EFFECT, ADVERSE, PHENACETIN                          | 0                                       | 0          | 7                                          | 2.012         | 0(0-Inf)                 |
| EFFECT, ADVERSE, PHENOBARBITAL                       | 0                                       | 0          | 6                                          | 1.4005        | 0(0-Inf)                 |
| EFFECT, ADVERSE, PHENOTHIAZINE                       | 0                                       | 0          | 6                                          | 1.6098        | 0(0-Inf)                 |
| EFFECT, ADVERSE, PLANT (POISONOUS), NEC              | 0                                       | 0          | 2                                          | 0.6309        | 0(0-Inf)                 |
| EFFECT, ADVERSE, PREDNISONE                          | 3                                       | 27.6755    | 50                                         | 22.1748       | 1.2481(0.3876-4.0184)    |
| EFFECT, ADVERSE, PROCAN-SR                           | 0                                       | 0          | 5                                          | 1.4865        | 0(0-Inf)                 |
| EFFECT, ADVERSE, PROGESTERONE                        | 1                                       | 17.8543    | 10                                         | 4.5149        | 3.9545(0.4981-31.3985)   |
| EFFECT, ADVERSE, PROPANOLOL                          | 0                                       | 0          | 12                                         | 3.5846        | 0(0-Inf)                 |
| EFFECT, ADVERSE, PSYCHOTHERAPEUTIC AGENT             | 1                                       | 7.06       | 52                                         | 14.1101       | 0.5004(0.069-3.6308)     |
| EFFECT, ADVERSE, QUINIDINE                           | 3                                       | 24.3477    | 26                                         | 9.3907        | 2.5927(0.7786-8.6341)    |
| EFFECT, ADVERSE, QUININE                             | 0                                       | 0          | 5                                          | 1.5264        | 0(0-Inf)                 |
| EFFECT, ADVERSE, RADIATION                           | 2                                       | 15.2222    | 37                                         | 11.9708       | 1.2716(0.3049-5.3027)    |
| EFFECT, ADVERSE, RADIATION, ACCIDENTAL EXPOSURE      | 0                                       | 0          | 1                                          | 0.2729        | 0(0-Inf)                 |
| EFFECT, ADVERSE, RADIATION, DIAGNOSTIC X-RAY         | 0                                       | 0          | 1                                          | 0.8877        | 0(0-Inf)                 |
| EFFECT, ADVERSE, RADIATION, NUCLEAR SCAN             | 0                                       | 0          | 1                                          | 0.3526        | 0(0-Inf)                 |
| EFFECT, ADVERSE, RADIATION, THERAPEUTIC              | 4                                       | 35.4554    | 208                                        | 86.7348       | 0.4088(0.1518-1.1007)    |
| EFFECT, ADVERSE, RADIATION, THERAPEUTIC, IMPLANT     | 0                                       | 0          | 1                                          | 0.2729        | 0(0-Inf)                 |
| EFFECT, ADVERSE, RADIATION, ULTRAVIOLET              | 0                                       | 0          | 4                                          | 1.5303        | 0(0-Inf)                 |
| EFFECT, ADVERSE, RADIATION, ULTRAVIOLET, THERAPEUTIC | 0                                       | 0          | 3                                          | 0.8018        | 0(0-Inf)                 |
| EFFECT, ADVERSE, RELAXANT, SKELETAL MUSCLE, CNS      | 0                                       | 0          | 3                                          | 1.2148        | 0(0-Inf)                 |
| EFFECT, ADVERSE, RESERPINE                           | 0                                       | 0          | 1                                          | 1.036         | 0(0-Inf)                 |
| EFFECT, ADVERSE, SALICYLATE                          | 3                                       | 20.9345    | 47                                         | 11.9545       | 1.7512(0.5419-5.6592)    |
| EFFECT, ADVERSE, SALT                                | 1                                       | 6.95       | 21                                         | 5.4782        | 1.2687(0.1694-9.4994)    |
| EFFECT, ADVERSE, SALURETIC                           | 1                                       | 7.2905     | 3                                          | 0.7192        | 10.1365(1.0167-101.0607) |
| EFFECT, ADVERSE, SCLEROSING AGENT                    | 0                                       | 0          | 1                                          | 0.2729        | 0(0-Inf)                 |
| EFFECT, ADVERSE, SEDATIVE, NON-BARBITURATE           | 0                                       | 0          | 5                                          | 2.343         | 0(0-Inf)                 |
| EFFECT, ADVERSE, SHELLFISH, NONBACTERIAL OR NOXIOUS  | 0                                       | 0          | 1                                          | 0.8539        | 0(0-Inf)                 |
| EFFECT, ADVERSE, SILICONE, NOS                       | 0                                       | 0          | 3                                          | 0.9608        | 0(0-Inf)                 |
| EFFECT, ADVERSE, SILVER COMPOUND, MEDICINAL          | 0                                       | 0          | 1                                          | 0.2354        | 0(0-Inf)                 |
| EFFECT, ADVERSE, SNUFF                               | 1                                       | 6.8976     | 0                                          | 0             | 12241045864.5737(0-Inf)  |

| Description                                        | No. of Positive Cases with Disease Code | Case Rate* | No. of Positive Controls with Disease Code | Control Rate* | Relative Risk (95%CI)    |
|----------------------------------------------------|-----------------------------------------|------------|--------------------------------------------|---------------|--------------------------|
| EFFECT, ADVERSE, SPASMOLYTIC                       | 0                                       | 0          | 2                                          | 0.6309        | 0(0-Inf)                 |
| EFFECT, ADVERSE, STEROID, NEC                      | 15                                      | 117.3235   | 151                                        | 50.449        | 2.3256(1.3634-3.9668)    |
| EFFECT, ADVERSE, STILBESTROL                       | 0                                       | 0          | 2                                          | 1.7788        | 0(0-Inf)                 |
| EFFECT, ADVERSE, STIMULANT, CENTRAL NERVOUS SYSTEM | 0                                       | 0          | 2                                          | 0.432         | 0(0-Inf)                 |
| EFFECT, ADVERSE, SULFONAMIDE                       | 3                                       | 20.8552    | 159                                        | 38.8369       | 0.537(0.171-1.6861)      |
| EFFECT, ADVERSE, SULFUR DIOXIDE FUMES              | 0                                       | 0          | 2                                          | 0.5709        | 0(0-Inf)                 |
| EFFECT, ADVERSE, SYMPATHOLYTIC                     | 0                                       | 0          | 17                                         | 4.519         | 0(0-Inf)                 |
| EFFECT, ADVERSE, SYMPATHOMIMETIC                   | 0                                       | 0          | 15                                         | 3.9083        | 0(0-Inf)                 |
| EFFECT, ADVERSE, SYSTEMIC AGENT                    | 1                                       | 9.0495     | 3                                          | 0.6806        | 13.2964(1.3291-133.0219) |
| EFFECT, ADVERSE, TAGAMET                           | 0                                       | 0          | 3                                          | 0.7971        | 0(0-Inf)                 |
| EFFECT, ADVERSE, TESTOSTERONE                      | 0                                       | 0          | 2                                          | 1.776         | 0(0-Inf)                 |
| EFFECT, ADVERSE, TETRACYCLINE                      | 1                                       | 7.0075     | 31                                         | 7.3978        | 0.9472(0.1286-6.9773)    |
| EFFECT, ADVERSE, THIAZIDE                          | 5                                       | 36.7567    | 92                                         | 27.0659       | 1.358(0.5501-3.3528)     |
| EFFECT, ADVERSE, THYROID DERIVATIVE                | 5                                       | 34.8434    | 142                                        | 35.2725       | 0.9878(0.4037-2.4169)    |
| EFFECT, ADVERSE, TOBACCO, NEC                      | 3                                       | 21.4573    | 59                                         | 14.2243       | 1.5085(0.4707-4.8345)    |
| EFFECT, ADVERSE, TRANQUILIZER                      | 0                                       | 0          | 47                                         | 16.6278       | 0(0-Inf)                 |
| EFFECT, ADVERSE, TYLENOL                           | 0                                       | 0          | 3                                          | 1.2145        | 0(0-Inf)                 |
| EFFECT, ADVERSE, VALIUM                            | 1                                       | 12.0433    | 5                                          | 1.4559        | 8.272(0.9435-72.5242)    |
| EFFECT, ADVERSE, VASODILATOR, NEC                  | 5                                       | 48.3419    | 83                                         | 39.1838       | 1.2337(0.4988-3.0513)    |
| EFFECT, ADVERSE, VASOPRESSIN                       | 0                                       | 0          | 2                                          | 0.4709        | 0(0-Inf)                 |
| EFFECT, ADVERSE, VENOM                             | 0                                       | 0          | 1                                          | 0.234         | 0(0-Inf)                 |
| EFFECT, ADVERSE, VENOMOUS INSECT STING             | 0                                       | 0          | 4                                          | 0.9671        | 0(0-Inf)                 |
| EFFECT, ADVERSE, VERAPAMIL                         | 1                                       | 8.422      | 29                                         | 11.104        | 0.7585(0.1028-5.5953)    |
| EFFECT, ADVERSE, VINCRISTINE                       | 0                                       | 0          | 7                                          | 2.2844        | 0(0-Inf)                 |
| EFFECT, ADVERSE, VITAMIN A                         | 0                                       | 0          | 2                                          | 0.5908        | 0(0-Inf)                 |
| EFFECT, ADVERSE, VITAMIN B COMPLEX                 | 0                                       | 0          | 10                                         | 2.9141        | 0(0-Inf)                 |
| EFFECT, ADVERSE, VITAMIN C                         | 0                                       | 0          | 1                                          | 0.4048        | 0(0-Inf)                 |
| EFFECT, ADVERSE, VITAMIN D                         | 0                                       | 0          | 4                                          | 0.884         | 0(0-Inf)                 |
| EFFECT, ADVERSE, VITAMIN E                         | 1                                       | 8.0456     | 2                                          | 0.7192        | 11.1866(0.968-129.2821)  |
| EFFECT, ADVERSE, VITAMIN, NEC                      | 0                                       | 0          | 12                                         | 3.1644        | 0(0-Inf)                 |
| EFFECT, ADVERSE, WARFARIN                          | 1                                       | 10.2129    | 7                                          | 3.627         | 2.8158(0.3415-23.2166)   |
| EFFECT, ADVERSE, WHOLE BLOOD                       | 1                                       | 13.0318    | 4                                          | 2.9504        | 4.4169(0.4852-40.2074)   |
| EFFECT, ADVERSE, XANTHINE DERIVATIVE               | 1                                       | 6.9469     | 18                                         | 4.4501        | 1.561(0.2065-11.7997)    |
| EFFECT, ADVERSE, XYLOCAINE                         | 0                                       | 0          | 2                                          | 0.4708        | 0(0-Inf)                 |
| EFFECT, OF FENESTRATION                            | 0                                       | 0          | 1                                          | 0.2354        | 0(0-Inf)                 |
| EFFECT, OF OPERATION MASTOID                       | 0                                       | 0          | 19                                         | 4.6376        | 0(0-Inf)                 |
| EFFECT, OF OTITIS MEDIA                            | 0                                       | 0          | 1                                          | 0.4751        | 0(0-Inf)                 |
| EFFECT, OF STAPES OPERATION                        | 0                                       | 0          | 6                                          | 1.9489        | 0(0-Inf)                 |
| EFFECT, OF TYMPANOPLASTY                           | 0                                       | 0          | 6                                          | 1.5148        | 0(0-Inf)                 |
| EFFUSION, CHOROIDAL                                | 0                                       | 0          | 6                                          | 1.5022        | 0(0-Inf)                 |

| Description                                                 | No. of Positive Cases with Disease Code | Case Rate* | No. of Positive Controls with Disease Code | Control Rate* | Relative Risk (95%CI) |
|-------------------------------------------------------------|-----------------------------------------|------------|--------------------------------------------|---------------|-----------------------|
| EFFUSION, JOINT, LOWER EXTREMITY                            | 40                                      | 293.3481   | 927                                        | 267.3214      | 1.0974(0.7988-1.5075) |
| EFFUSION, JOINT, NOS                                        | 0                                       | 0          | 34                                         | 8.118         | 0(0-Inf)              |
| EFFUSION, JOINT, UPPER EXTREMITY                            | 3                                       | 22.0242    | 68                                         | 20.572        | 1.0706(0.3357-3.4144) |
| EFFUSION, MIDDLE EAR                                        | 4                                       | 32.1419    | 61                                         | 21.5553       | 1.4911(0.5399-4.1184) |
| EFFUSION, PERICARDIAL                                       | 2                                       | 17.0384    | 102                                        | 39.8935       | 0.4271(0.1052-1.734)  |
| EFFUSION, PERICARDIAL, MALIGNANT                            | 0                                       | 0          | 2                                          | 1.0781        | 0(0-Inf)              |
| EFFUSION, PLEURAL, CHYLOUS                                  | 0                                       | 0          | 1                                          | 0.8878        | 0(0-Inf)              |
| EFFUSION, PLEURAL, HEMORRHAGIC                              | 0                                       | 0          | 1                                          | 0.4048        | 0(0-Inf)              |
| EFFUSION, PLEURAL, MALIGNANT                                | 5                                       | 46.8703    | 71                                         | 32.2253       | 1.4545(0.5852-3.6151) |
| EFFUSION, PLEURAL, NOS                                      | 28                                      | 302.2063   | 531                                        | 291.931       | 1.0352(0.7072-1.5154) |
| ELASTOFIBROMA                                               | 0                                       | 0          | 1                                          | 0.2354        | 0(0-Inf)              |
| ELASTOSIS, NOS                                              | 24                                      | 192.9706   | 453                                        | 156.6843      | 1.2316(0.8158-1.8594) |
| ELASTOSIS, SENILE                                           | 0                                       | 0          | 2                                          | 1.7806        | 0(0-Inf)              |
| ELECTROCARDIOVERSION                                        | 0                                       | 0          | 5                                          | 1.6798        | 0(0-Inf)              |
| ELECTROCUTION                                               | 0                                       | 0          | 1                                          | 0.2729        | 0(0-Inf)              |
| ELEPHANTIASIS, NOS                                          | 0                                       | 0          | 1                                          | 0.4048        | 0(0-Inf)              |
| ELEVATION, BLOOD SUGAR                                      | 21                                      | 151.611    | 632                                        | 179.1588      | 0.8462(0.5473-1.3085) |
| ELEVATION, DIAPHRAGM, ACQUIRED                              | 0                                       | 0          | 4                                          | 1.5026        | 0(0-Inf)              |
| ELEVATION, HEMIDIAPHRAGM, ACQUIRED                          | 0                                       | 0          | 27                                         | 9.7975        | 0(0-Inf)              |
| ELEVATION, PULMONARY PRESSURES                              | 0                                       | 0          | 12                                         | 4.348         | 0(0-Inf)              |
| ELEVATION, VENTRICULAR PRESSURES, NOS, SEE ALSO FAILURE     | 0                                       | 0          | 4                                          | 1.5792        | 0(0-Inf)              |
| ELLIPTOCYTOSIS                                              | 0                                       | 0          | 3                                          | 0.8873        | 0(0-Inf)              |
| ELONGATION, CERVIX, ACQUIRED                                | 0                                       | 0          | 4                                          | 0.9421        | 0(0-Inf)              |
| ELONGATION, CERVIX, NOS                                     | 0                                       | 0          | 3                                          | 0.8035        | 0(0-Inf)              |
| ELONGATION, UVULA, ACQUIRED                                 | 0                                       | 0          | 2                                          | 0.5458        | 0(0-Inf)              |
| ELONGATION, UVULA, NOS                                      | 0                                       | 0          | 13                                         | 3.864         | 0(0-Inf)              |
| ELSCHNIG PEARLS                                             | 0                                       | 0          | 2                                          | 1.1614        | 0(0-Inf)              |
| EMBOLISM, AIR, CODE ALSO EMBOLISM BY SITE                   | 0                                       | 0          | 1                                          | 0.3526        | 0(0-Inf)              |
| EMBOLISM, AORTA, ABDOMINAL                                  | 0                                       | 0          | 2                                          | 1.1976        | 0(0-Inf)              |
| EMBOLISM, AORTA, SADDLE                                     | 0                                       | 0          | 1                                          | 0.4048        | 0(0-Inf)              |
| EMBOLISM, ARTERIOSCLEROTIC, CODE ALSO EMBOLISM BY SITE      | 0                                       | 0          | 4                                          | 2.3013        | 0(0-Inf)              |
| EMBOLISM, ARTERY, NEC                                       | 0                                       | 0          | 9                                          | 6.2811        | 0(0-Inf)              |
| EMBOLISM, ATHEROMATOUS, CODE ALSO EMBOLISM BY SITE          | 1                                       | 11.6045    | 22                                         | 13.5878       | 0.854(0.1147-6.3603)  |
| EMBOLISM, BRACHIAL ARTERY                                   | 0                                       | 0          | 5                                          | 2.0032        | 0(0-Inf)              |
| EMBOLISM, BRAIN, SEPTIC                                     | 0                                       | 0          | 1                                          | 0.2354        | 0(0-Inf)              |
| EMBOLISM, CARDIAC, CODE ALSO INFARCTION, MYOCARDIAL BY SITE | 0                                       | 0          | 9                                          | 5.1579        | 0(0-Inf)              |
| EMBOLISM, CAROTID                                           | 0                                       | 0          | 3                                          | 0.8188        | 0(0-Inf)              |
| EMBOLISM, CEREBELLAR                                        | 0                                       | 0          | 1                                          | 2.4858        | 0(0-Inf)              |
| EMBOLISM, CEREBRAL                                          | 1                                       | 8.7576     | 28                                         | 11.4129       | 0.7673(0.1039-5.6663) |



| Description                                                  | No. of Positive Cases with Disease Code | Case Rate* | No. of Positive Controls with Disease Code | Control Rate* | Relative Risk (95%CI)    |
|--------------------------------------------------------------|-----------------------------------------|------------|--------------------------------------------|---------------|--------------------------|
| EMBOLISM, CEREBRAL/BRAIN, OLD                                | 1                                       | 10.9657    | 16                                         | 9.2319        | 1.1878(0.1565-9.015)     |
| EMBOLISM, CHOLESTEROL, CODE ALSO EMBOLISM BY SITE            | 3                                       | 28.5922    | 43                                         | 19.9976       | 1.4298(0.4416-4.6292)    |
| EMBOLISM, CHOLESTEROL, RETINA (USE FOR ANY EYE DX)           | 3                                       | 28.6145    | 38                                         | 17.6877       | 1.6178(0.4969-5.2668)    |
| EMBOLISM, CORONARY, CODE ALSO INFARCTION, MYOCARDIAL BY SITE | 0                                       | 0          | 4                                          | 2.4131        | 0(0-Inf)                 |
| EMBOLISM, DIGITAL ARTERY, FOOT                               | 0                                       | 0          | 1                                          | 0.2354        | 0(0-Inf)                 |
| EMBOLISM, DIGITAL ARTERY, HAND                               | 0                                       | 0          | 2                                          | 0.4853        | 0(0-Inf)                 |
| EMBOLISM, EXTREMITY, LOWER (ARTERY OR VEIN)                  | 2                                       | 19.5869    | 38                                         | 18.4256       | 1.063(0.2554-4.424)      |
| EMBOLISM, EXTREMITY, NOS (ARTERY OR VEIN)                    | 0                                       | 0          | 1                                          | 0.8877        | 0(0-Inf)                 |
| EMBOLISM, EXTREMITY, UPPER (ARTERY OR VEIN)                  | 2                                       | 18.1979    | 13                                         | 5.6346        | 3.2296(0.721-14.4659)    |
| EMBOLISM, EYE, NOS                                           | 0                                       | 0          | 31                                         | 12.4599       | 0(0-Inf)                 |
| EMBOLISM, FAT, CODE ALSO EMBOLISM BY SITE                    | 0                                       | 0          | 1                                          | 1.0364        | 0(0-Inf)                 |
| EMBOLISM, FEMORAL ARTERY                                     | 3                                       | 26.7492    | 9                                          | 3.7774        | 7.0814(1.8826-26.6374)   |
| EMBOLISM, FEMORAL VEIN                                       | 0                                       | 0          | 1                                          | 0.405         | 0(0-Inf)                 |
| EMBOLISM, HEPATIC                                            | 1                                       | 7.1775     | 0                                          | 0             | 12720725619.5093(0-Inf)  |
| EMBOLISM, ILIAC ARTERY                                       | 1                                       | 6.9139     | 2                                          | 0.4937        | 14.0052(1.2023-163.1469) |
| EMBOLISM, INTESTINE                                          | 0                                       | 0          | 3                                          | 2.8215        | 0(0-Inf)                 |
| EMBOLISM, INTRAOPERATIVE, CODE ALSO EMBOLISM BY SITE         | 0                                       | 0          | 1                                          | 0.2729        | 0(0-Inf)                 |
| EMBOLISM, KIDNEY                                             | 0                                       | 0          | 2                                          | 1.7757        | 0(0-Inf)                 |
| EMBOLISM, LUNG                                               | 0                                       | 0          | 5                                          | 4.6257        | 0(0-Inf)                 |
| EMBOLISM, LUNG, OLD                                          | 0                                       | 0          | 8                                          | 5.044         | 0(0-Inf)                 |
| EMBOLISM, MESENTERIC ARTERY                                  | 0                                       | 0          | 2                                          | 1.7057        | 0(0-Inf)                 |
| EMBOLISM, OPHTHALMIC                                         | 0                                       | 0          | 1                                          | 0.3526        | 0(0-Inf)                 |
| EMBOLISM, PARADOXICAL, CODE ALSO BY SITE IF STATED           | 0                                       | 0          | 4                                          | 1.9296        | 0(0-Inf)                 |
| EMBOLISM, PERIPHERAL, NOS, SEE ALSO EMBOLISM BY SITE         | 0                                       | 0          | 2                                          | 1.7762        | 0(0-Inf)                 |
| EMBOLISM, PERONEAL ARTERY                                    | 0                                       | 0          | 1                                          | 0.8885        | 0(0-Inf)                 |
| EMBOLISM, PLATELET, CODE ALSO EMBOLISM, SITE SPECIFIED       | 0                                       | 0          | 3                                          | 2.0488        | 0(0-Inf)                 |
| EMBOLISM, POPLITEAL ARTERY                                   | 3                                       | 38.1307    | 7                                          | 4.8664        | 7.8355(1.9992-30.7099)   |
| EMBOLISM, POST-OPERATIVE, CODE ALSO EMBOLISM BY SITE         | 0                                       | 0          | 19                                         | 9.9428        | 0(0-Inf)                 |
| EMBOLISM, PULMONARY                                          | 22                                      | 218.3465   | 417                                        | 203.7561      | 1.0716(0.6971-1.6473)    |
| EMBOLISM, PULMONARY, OLD                                     | 15                                      | 144.3227   | 252                                        | 118.672       | 1.2161(0.7211-2.0511)    |
| EMBOLISM, RENAL ARTERY                                       | 0                                       | 0          | 5                                          | 3.6213        | 0(0-Inf)                 |
| EMBOLISM, RETINA                                             | 0                                       | 0          | 27                                         | 10.2815       | 0(0-Inf)                 |
| EMBOLISM, RETINA, (HOLLENHORST PLAQUE)                       | 0                                       | 0          | 2                                          | 1.0792        | 0(0-Inf)                 |
| EMBOLISM, SPINAL CORD, PYOGENIC                              | 0                                       | 0          | 1                                          | 0.8539        | 0(0-Inf)                 |
| EMBOLISM, SUBCLAVIAN ARTERY                                  | 0                                       | 0          | 3                                          | 0.6548        | 0(0-Inf)                 |
| EMBOLISM, TIBIAL ARTERY                                      | 2                                       | 23.6109    | 3                                          | 1.8951        | 12.4591(2.0446-75.9203)  |
| EMBOLISM, ULNAR ARTERY                                       | 0                                       | 0          | 1                                          | 1.9061        | 0(0-Inf)                 |
| EMBOLISM, VEIN, NEC                                          | 0                                       | 0          | 12                                         | 3.668         | 0(0-Inf)                 |
| EMBRYOTOXON, NOS                                             | 0                                       | 0          | 1                                          | 0.2729        | 0(0-Inf)                 |

| Description                                        | No. of Positive Cases with Disease Code | Case Rate* | No. of Positive Controls with Disease Code | Control Rate* | Relative Risk (95%CI)  |
|----------------------------------------------------|-----------------------------------------|------------|--------------------------------------------|---------------|------------------------|
| EMESIS (SEE ALSO VOMITING)                         | 6                                       | 78.6007    | 122                                        | 92.0424       | 0.854(0.3756-1.9416)   |
| EMPHYSEMA, BULLOUS                                 | 0                                       | 0          | 11                                         | 2.9922        | 0(0-Inf)               |
| EMPHYSEMA, CENTRILOBULAR                           | 0                                       | 0          | 3                                          | 1.2104        | 0(0-Inf)               |
| EMPHYSEMA, NOS                                     | 15                                      | 136.8178   | 364                                        | 157.48        | 0.8688(0.5177-1.4579)  |
| EMPHYSEMA, PULMONARY                               | 1                                       | 7.3399     | 15                                         | 4.5898        | 1.5992(0.2094-12.2099) |
| EMPHYSEMA, SUBCUTANEOUS                            | 0                                       | 0          | 9                                          | 2.7011        | 0(0-Inf)               |
| EMPTY SELLA                                        | 0                                       | 0          | 13                                         | 3.2454        | 0(0-Inf)               |
| EMPHYEMA, GALLBLADDER                              | 0                                       | 0          | 5                                          | 2.3667        | 0(0-Inf)               |
| EMPHYEMA, LUNG, WITH FISTULA                       | 0                                       | 0          | 1                                          | 0.2729        | 0(0-Inf)               |
| EMPHYEMA, NOS (LUNG#)                              | 1                                       | 7.6209     | 40                                         | 13.1946       | 0.5776(0.0792-4.2147)  |
| EMPHYEMA, SURGICAL                                 | 0                                       | 0          | 2                                          | 1.0786        | 0(0-Inf)               |
| EMPHYEMA, TUBERCULOUS                              | 1                                       | 11.7106    | 0                                          | 0             | 8837677299.9799(0-Inf) |
| ENCEPHALITIS, HERPETIC                             | 0                                       | 0          | 1                                          | 1.9059        | 0(0-Inf)               |
| ENCEPHALITIS, INFECTIOUS                           | 0                                       | 0          | 2                                          | 0.7053        | 0(0-Inf)               |
| ENCEPHALITIS, LATE EFFECT                          | 0                                       | 0          | 2                                          | 0.5475        | 0(0-Inf)               |
| ENCEPHALITIS, MENINGOCOCCAL                        | 0                                       | 0          | 1                                          | 0.8878        | 0(0-Inf)               |
| ENCEPHALITIS, NOS                                  | 0                                       | 0          | 5                                          | 1.1872        | 0(0-Inf)               |
| ENCEPHALITIS, VIRAL, NOS                           | 0                                       | 0          | 1                                          | 0.234         | 0(0-Inf)               |
| ENCEPHALOCELE, NASAL                               | 0                                       | 0          | 1                                          | 0.3526        | 0(0-Inf)               |
| ENCEPHALOCELE, NOS                                 | 0                                       | 0          | 2                                          | 1.0783        | 0(0-Inf)               |
| ENCEPHALOMALACIA                                   | 0                                       | 0          | 7                                          | 2.9681        | 0(0-Inf)               |
| ENCEPHALOPATHY, ALCOHOLIC, CHRONIC                 | 0                                       | 0          | 3                                          | 0.9165        | 0(0-Inf)               |
| ENCEPHALOPATHY, DUE TO TRAUMA                      | 0                                       | 0          | 2                                          | 0.8725        | 0(0-Inf)               |
| ENCEPHALOPATHY, HEPATIC                            | 2                                       | 16.6947    | 17                                         | 6.4321        | 2.5955(0.594-11.3417)  |
| ENCEPHALOPATHY, HYPERTENSIVE                       | 1                                       | 10.7423    | 5                                          | 2.7537        | 3.901(0.4488-33.9116)  |
| ENCEPHALOPATHY, HYPOXIC/ANOXIC                     | 1                                       | 9.6882     | 51                                         | 24.4433       | 0.3964(0.0547-2.8741)  |
| ENCEPHALOPATHY, METABOLIC                          | 2                                       | 17.3931    | 24                                         | 9.6861        | 1.7957(0.4213-7.6545)  |
| ENCEPHALOPATHY, NOS                                | 6                                       | 58.6137    | 97                                         | 46.5822       | 1.2583(0.5501-2.8781)  |
| ENCEPHALOPATHY, PORTAL-SYSTEMIC                    | 2                                       | 14.2232    | 0                                          | 0             | 4860129887.7014(0-Inf) |
| ENCEPHALOPATHY, POST-TRAUMATIC                     | 0                                       | 0          | 2                                          | 0.8724        | 0(0-Inf)               |
| ENCEPHALOPATHY, WERNICKE'S (KORSAKOFF'S), NOS      | 0                                       | 0          | 1                                          | 0.3526        | 0(0-Inf)               |
| ENCHONDROMA, NOS, CODE ALSO CHONDROMA BY SITE      | 4                                       | 29.8904    | 24                                         | 5.8173        | 5.1382(1.7637-14.9689) |
| ENCOPRESIS, NOS                                    | 0                                       | 0          | 5                                          | 1.6163        | 0(0-Inf)               |
| END ORGAN (EAR) CONDITION SEE ALSO DISEASE/FAILURE | 0                                       | 0          | 1                                          | 0.3526        | 0(0-Inf)               |
| ENDAMEBA                                           | 0                                       | 0          | 1                                          | 0.234         | 0(0-Inf)               |
| ENDOCARDITIS, AORTIC, NOS                          | 0                                       | 0          | 21                                         | 7.9756        | 0(0-Inf)               |
| ENDOCARDITIS, BACTERIAL, ACUTE                     | 0                                       | 0          | 2                                          | 0.5475        | 0(0-Inf)               |
| ENDOCARDITIS, BACTERIAL, NOS                       | 0                                       | 0          | 12                                         | 4.5091        | 0(0-Inf)               |
| ENDOCARDITIS, BACTERIAL, STAPHYLOCOCCAL            | 1                                       | 10.94      | 6                                          | 3.4215        | 3.1975(0.3803-26.8856) |
| ENDOCARDITIS, BACTERIAL, STREPTOCOCCAL             | 1                                       | 8.0344     | 7                                          | 2.6107        | 3.0775(0.3743-25.3031) |

| Description                                                            | No. of Positive Cases with Disease Code | Case Rate* | No. of Positive Controls with Disease Code | Control Rate* | Relative Risk (95%CI) |
|------------------------------------------------------------------------|-----------------------------------------|------------|--------------------------------------------|---------------|-----------------------|
| ENDOCARDITIS, BACTERIAL, SUBACUTE                                      | 0                                       | 0          | 8                                          | 2.0271        | 0(0-Inf)              |
| ENDOCARDITIS, INFECTIOUS                                               | 0                                       | 0          | 9                                          | 3.5849        | 0(0-Inf)              |
| ENDOCARDITIS, MITRAL, NOS                                              | 0                                       | 0          | 26                                         | 6.4871        | 0(0-Inf)              |
| ENDOCARDITIS, NOS, SEE ALSO DISEASE, HEART, VALVULAR                   | 1                                       | 10.7612    | 17                                         | 9.4332        | 1.1408(0.1509-8.6223) |
| ENDOCARDITIS, PROSTHETIC HEART VALVE, CODE ALSO STATUS VALVE BY SITE   | 0                                       | 0          | 7                                          | 2.7297        | 0(0-Inf)              |
| ENDOCARDITIS, RHEUMATIC, NOS                                           | 0                                       | 0          | 2                                          | 1.6564        | 0(0-Inf)              |
| ENDOCARDITIS, SUBACUTE                                                 | 0                                       | 0          | 2                                          | 0.4853        | 0(0-Inf)              |
| ENDOCARDITIS, TRICUSPID, RHEUMATIC                                     | 0                                       | 0          | 1                                          | 0.234         | 0(0-Inf)              |
| ENDOCARDITIS, VEGETATIVE                                               | 0                                       | 0          | 2                                          | 1.7759        | 0(0-Inf)              |
| ENDOCERVICITIS, CHRONIC                                                | 5                                       | 172.798    | 74                                         | 48.6913       | 3.5488(1.4305-8.8039) |
| ENDOCERVICITIS, CHRONIC CYSTIC                                         | 0                                       | 0          | 4                                          | 1.3524        | 0(0-Inf)              |
| ENDOCERVICITIS, CYSTIC                                                 | 0                                       | 0          | 2                                          | 0.4709        | 0(0-Inf)              |
| ENDOCERVICITIS, NOS                                                    | 0                                       | 0          | 25                                         | 17.0552       | 0(0-Inf)              |
| ENDOCRINOPATHY                                                         | 0                                       | 0          | 1                                          | 0.234         | 0(0-Inf)              |
| ENDODONTITIS                                                           | 0                                       | 0          | 20                                         | 5.5308        | 0(0-Inf)              |
| ENDOMETRIOMA, OVARY                                                    | 1                                       | 44.3778    | 22                                         | 17.1772       | 2.5835(0.347-19.2334) |
| ENDOMETRIOMA, OVARY, CYSTIC                                            | 0                                       | 0          | 9                                          | 4.5327        | 0(0-Inf)              |
| ENDOMETRIOMA, OVARY, RUPTURED                                          | 0                                       | 0          | 1                                          | 0.398         | 0(0-Inf)              |
| ENDOMETRIOSIS, APPENDIX                                                | 0                                       | 0          | 7                                          | 2.7887        | 0(0-Inf)              |
| ENDOMETRIOSIS, BLADDER                                                 | 0                                       | 0          | 3                                          | 1.9326        | 0(0-Inf)              |
| ENDOMETRIOSIS, BROAD LIGAMENT                                          | 0                                       | 0          | 4                                          | 1.8962        | 0(0-Inf)              |
| ENDOMETRIOSIS, CERVIX                                                  | 0                                       | 0          | 3                                          | 1.1943        | 0(0-Inf)              |
| ENDOMETRIOSIS, CUL-DE-SAC                                              | 0                                       | 0          | 31                                         | 24.2271       | 0(0-Inf)              |
| ENDOMETRIOSIS, EXTERNAL                                                | 0                                       | 0          | 10                                         | 4.9178        | 0(0-Inf)              |
| ENDOMETRIOSIS, FALLOPIAN TUBE                                          | 0                                       | 0          | 22                                         | 15.5729       | 0(0-Inf)              |
| ENDOMETRIOSIS, INTESTINE, LARGE                                        | 0                                       | 0          | 17                                         | 15.9815       | 0(0-Inf)              |
| ENDOMETRIOSIS, INTESTINE, NOS                                          | 0                                       | 0          | 1                                          | 0.398         | 0(0-Inf)              |
| ENDOMETRIOSIS, INTESTINE, SMALL                                        | 0                                       | 0          | 4                                          | 1.3526        | 0(0-Inf)              |
| ENDOMETRIOSIS, MULTIPLE SITES                                          | 0                                       | 0          | 1                                          | 0.398         | 0(0-Inf)              |
| ENDOMETRIOSIS, NOS (CODE PELVIC# UNLESS STATED EXTERNAL OR OTHER SITE) | 0                                       | 0          | 21                                         | 21.2491       | 0(0-Inf)              |
| ENDOMETRIOSIS, OVARY                                                   | 2                                       | 85.0257    | 59                                         | 44.5509       | 1.9085(0.4654-7.8272) |
| ENDOMETRIOSIS, OVARY, CYSTIC                                           | 0                                       | 0          | 5                                          | 1.7453        | 0(0-Inf)              |
| ENDOMETRIOSIS, PELVIC                                                  | 3                                       | 127.5961   | 112                                        | 85.0735       | 1.4998(0.4759-4.727)  |
| ENDOMETRIOSIS, PERITONEAL                                              | 0                                       | 0          | 5                                          | 2.6444        | 0(0-Inf)              |
| ENDOMETRIOSIS, RECTUM                                                  | 0                                       | 0          | 2                                          | 1.1374        | 0(0-Inf)              |
| ENDOMETRIOSIS, UMBILICUS                                               | 0                                       | 0          | 1                                          | 0.398         | 0(0-Inf)              |
| ENDOMETRIOSIS, UTEROSACRAL LIGAMENT                                    | 0                                       | 0          | 13                                         | 12.8599       | 0(0-Inf)              |
| ENDOMETRIOSIS, UTERUS                                                  | 0                                       | 0          | 83                                         | 67.795        | 0(0-Inf)              |

| Description                               | No. of Positive Cases with Disease Code | Case Rate* | No. of Positive Controls with Disease Code | Control Rate* | Relative Risk (95%CI)    |
|-------------------------------------------|-----------------------------------------|------------|--------------------------------------------|---------------|--------------------------|
| ENDOMETRIOSIS, VAGINA                     | 0                                       | 0          | 2                                          | 0.7961        | 0(0-Inf)                 |
| ENDOMETRITIS, ACUTE                       | 0                                       | 0          | 6                                          | 1.4924        | 0(0-Inf)                 |
| ENDOMETRITIS, CHRONIC                     | 0                                       | 0          | 4                                          | 0.9364        | 0(0-Inf)                 |
| ENDOMETRITIS, NOS                         | 0                                       | 0          | 19                                         | 18.2468       | 0(0-Inf)                 |
| ENDOPHTHALMITIS, ACUTE                    | 0                                       | 0          | 1                                          | 0.2354        | 0(0-Inf)                 |
| ENDOPHTHALMITIS, CHRONIC                  | 0                                       | 0          | 1                                          | 1.9062        | 0(0-Inf)                 |
| ENDOPHTHALMITIS, NOS                      | 1                                       | 8.9955     | 16                                         | 6.8088        | 1.3212(0.1739-10.0369)   |
| ENDOSALPINGIOSIS (MESOTHELIAL)            | 0                                       | 0          | 8                                          | 2.0802        | 0(0-Inf)                 |
| ENDOTHELIITIS, HERPETIC                   | 0                                       | 0          | 2                                          | 1.0787        | 0(0-Inf)                 |
| ENDOTHELIITIS, NOS (EYE#)                 | 0                                       | 0          | 3                                          | 2.8237        | 0(0-Inf)                 |
| ENGORGEMENT, BREAST, NOS                  | 0                                       | 0          | 1                                          | 0.4048        | 0(0-Inf)                 |
| ENLARGEMENT, ANTRAL FOLDS                 | 0                                       | 0          | 7                                          | 2.5444        | 0(0-Inf)                 |
| ENLARGEMENT, ATRIUM                       | 0                                       | 0          | 51                                         | 17.5456       | 0(0-Inf)                 |
| ENLARGEMENT, BREAST                       | 0                                       | 0          | 27                                         | 11.9267       | 0(0-Inf)                 |
| ENLARGEMENT, BREAST, ASYMMETRICAL         | 0                                       | 0          | 1                                          | 0.398         | 0(0-Inf)                 |
| ENLARGEMENT, CARDIAC                      | 2                                       | 14.8413    | 18                                         | 5.487         | 2.7048(0.621-11.7814)    |
| ENLARGEMENT, GASTRIC RUGAL                | 0                                       | 0          | 2                                          | 0.5458        | 0(0-Inf)                 |
| ENLARGEMENT, HILUS (LUNG)                 | 1                                       | 9.9203     | 1                                          | 0.494         | 20.0798(1.2002-335.9495) |
| ENLARGEMENT, LACRIMAL GLAND CHRONIC       | 0                                       | 0          | 1                                          | 0.4751        | 0(0-Inf)                 |
| ENLARGEMENT, LYMPH GLAND                  | 1                                       | 9.5479     | 24                                         | 6.3147        | 1.512(0.2032-11.2503)    |
| ENLARGEMENT, OPTIC DISC                   | 0                                       | 0          | 5                                          | 1.9394        | 0(0-Inf)                 |
| ENLARGEMENT, OVARIAN                      | 0                                       | 0          | 16                                         | 10.4243       | 0(0-Inf)                 |
| ENLARGEMENT, OVARIAN, QUESTION            | 0                                       | 0          | 1                                          | 0.2354        | 0(0-Inf)                 |
| ENLARGEMENT, SELLA                        | 0                                       | 0          | 4                                          | 1.4115        | 0(0-Inf)                 |
| ENLARGEMENT, THYROID, SEE ALSO GOITER     | 3                                       | 21.5603    | 84                                         | 18.8994       | 1.1408(0.3593-3.6221)    |
| ENLARGEMENT, UTERINE                      | 1                                       | 24.1702    | 54                                         | 28.5583       | 0.8463(0.1168-6.1347)    |
| ENOPHTHALMOS, NOS                         | 0                                       | 0          | 2                                          | 1.0785        | 0(0-Inf)                 |
| ENOPHTHALMOS, WITH TRAUMA                 | 0                                       | 0          | 1                                          | 0.4049        | 0(0-Inf)                 |
| ENTAMEBIASES                              | 1                                       | 8.0396     | 6                                          | 1.3996        | 5.7441(0.6749-48.889)    |
| ENTERITIS, BACTERIAL, NOS                 | 3                                       | 23.9685    | 57                                         | 13.995        | 1.7126(0.5338-5.4944)    |
| ENTERITIS, DUE TO CAMPYLOBACTER           | 1                                       | 8.0595     | 18                                         | 6.372         | 1.2648(0.1675-9.5484)    |
| ENTERITIS, DUE TO CLOSTRIDIUM             | 8                                       | 78.0341    | 44                                         | 21.0989       | 3.6985(1.7301-7.9065)    |
| ENTERITIS, DUE TO E. COLI                 | 1                                       | 6.9182     | 5                                          | 1.1416        | 6.0599(0.6863-53.5077)   |
| ENTERITIS, DUE TO PARACOLON BACILLUS, NEC | 0                                       | 0          | 2                                          | 0.5911        | 0(0-Inf)                 |
| ENTERITIS, DUE TO ROTAVIRUS               | 0                                       | 0          | 1                                          | 2.4857        | 0(0-Inf)                 |
| ENTERITIS, DUE TO YERSINIA                | 0                                       | 0          | 2                                          | 0.4708        | 0(0-Inf)                 |
| ENTERITIS, INFECTIOUS                     | 0                                       | 0          | 8                                          | 1.985         | 0(0-Inf)                 |
| ENTERITIS, NOS (CHRONIC)                  | 1                                       | 7.3465     | 43                                         | 12.9352       | 0.5679(0.0779-4.1387)    |
| ENTERITIS, NOS (INFECTIOUS)               | 1                                       | 7.8467     | 34                                         | 8.0007        | 0.9808(0.1336-7.2002)    |
| ENTERITIS, RADIATION                      | 0                                       | 0          | 6                                          | 2.4446        | 0(0-Inf)                 |

| Description                                            | No. of Positive Cases with Disease Code | Case Rate* | No. of Positive Controls with Disease Code | Control Rate* | Relative Risk (95%CI)    |
|--------------------------------------------------------|-----------------------------------------|------------|--------------------------------------------|---------------|--------------------------|
| ENTERITIS, REGIONAL, NOS                               | 0                                       | 0          | 3                                          | 1.5111        | 0(0-Inf)                 |
| ENTERITIS, REGIONAL, RECURRENT                         | 0                                       | 0          | 1                                          | 0.234         | 0(0-Inf)                 |
| ENTERITIS, VIRAL, NOS                                  | 3                                       | 21.0081    | 32                                         | 7.6781        | 2.7361(0.8309-9.0096)    |
| ENTEROBIASIS                                           | 0                                       | 0          | 3                                          | 1.6185        | 0(0-Inf)                 |
| ENTEROCELE, NOS (EXCEPT VAGINA)                        | 1                                       | 13.8525    | 14                                         | 7.0013        | 1.9786(0.2569-15.2395)   |
| ENTEROCELE, VAGINA                                     | 2                                       | 30.6767    | 62                                         | 40.6889       | 0.7539(0.1837-3.094)     |
| ENTEROCELE, VAGINA, GR 1                               | 0                                       | 0          | 19                                         | 8.5317        | 0(0-Inf)                 |
| ENTEROCELE, VAGINA, GR 2                               | 2                                       | 28.0806    | 100                                        | 44.7901       | 0.6269(0.1542-2.5488)    |
| ENTEROCELE, VAGINA, GR 3                               | 3                                       | 43.7746    | 90                                         | 52.2781       | 0.8373(0.2642-2.6542)    |
| ENTEROCELE, VAGINA, GR 4                               | 1                                       | 14.8083    | 31                                         | 18.8172       | 0.787(0.1068-5.7966)     |
| ENTEROCOCCUS-SEE ALSO INFECTION STREPTOCOCCAL BY SITE  | 1                                       | 10.7212    | 20                                         | 11.1874       | 0.9583(0.1279-7.1793)    |
| ENTEROCOLITIS, INFECTIOUS, NOS, SEE ALSO COLITIS       | 1                                       | 7.0462     | 8                                          | 2.1717        | 3.2445(0.399-26.3863)    |
| ENTEROPATHY, GLUTEN                                    | 0                                       | 0          | 7                                          | 1.837         | 0(0-Inf)                 |
| ENTEROPATHY, NOS                                       | 1                                       | 7.9178     | 13                                         | 4.5086        | 1.7562(0.2275-13.5577)   |
| ENTEROPATHY, PROTEIN-LOSING                            | 0                                       | 0          | 1                                          | 0.4048        | 0(0-Inf)                 |
| ENTHESITIS                                             | 0                                       | 0          | 4                                          | 0.952         | 0(0-Inf)                 |
| ENTHESOPATHY                                           | 0                                       | 0          | 4                                          | 1.5025        | 0(0-Inf)                 |
| ENTRAPMENT, LUNG                                       | 0                                       | 0          | 3                                          | 1.9022        | 0(0-Inf)                 |
| ENTRAPMENT, NERVE                                      | 1                                       | 6.9564     | 41                                         | 10.9441       | 0.6356(0.0871-4.6372)    |
| ENTROPION, CICATRICIAL                                 | 0                                       | 0          | 5                                          | 1.7338        | 0(0-Inf)                 |
| ENTROPION, NOS                                         | 6                                       | 74.7792    | 90                                         | 61.6346       | 1.2133(0.5297-2.779)     |
| ENTROPION, SPASTIC                                     | 0                                       | 0          | 10                                         | 6.0379        | 0(0-Inf)                 |
| ENUCLEATION, EYE, SURGICAL                             | 2                                       | 21.351     | 17                                         | 9.317         | 2.2916(0.5256-9.9908)    |
| ENUCLEATION, EYE, TRAUMATIC, LATE EFFECT               | 0                                       | 0          | 1                                          | 0.3526        | 0(0-Inf)                 |
| ENURESIS, NOS                                          | 0                                       | 0          | 17                                         | 7.2223        | 0(0-Inf)                 |
| EOSINOPHILIA, NOS                                      | 3                                       | 21.8035    | 57                                         | 16.8122       | 1.2969(0.4044-4.159)     |
| EOSINOPHILIA, SKIN                                     | 0                                       | 0          | 27                                         | 9.3399        | 0(0-Inf)                 |
| EPENDYMOMA, NOS, CODE ALSO NEOPLASM, MALIGNANT BY SITE | 1                                       | 7.0222     | 1                                          | 0.265         | 26.5029(1.5951-440.3487) |
| EPHELIDES                                              | 0                                       | 0          | 12                                         | 3.0891        | 0(0-Inf)                 |
| EPICONDYLITIS                                          | 45                                      | 400.3708   | 1776                                       | 471.8917      | 0.8484(0.6307-1.1413)    |
| EPIDERMOLYSIS BULLOSA, NOS                             | 0                                       | 0          | 1                                          | 0.234         | 0(0-Inf)                 |
| EPIDIDYMITIS, ACUTE                                    | 2                                       | 30.1602    | 24                                         | 12.9061       | 2.3369(0.5492-9.9441)    |
| EPIDIDYMITIS, CHRONIC                                  | 1                                       | 13.7881    | 23                                         | 13.0635       | 1.0555(0.1419-7.85)      |
| EPIDIDYMITIS, NOS                                      | 12                                      | 84.0295    | 306                                        | 84.4134       | 0.9955(0.5585-1.7743)    |
| EPIDIDYMITIS, RECURRENT                                | 2                                       | 30.0021    | 10                                         | 5.356         | 5.6016(1.213-25.868)     |
| EPIDIDYMO-ORCHITIS                                     | 5                                       | 75.7458    | 40                                         | 27.0523       | 2.8(1.0999-7.1277)       |
| EPIGLOTTIDITIS, ACUTE                                  | 0                                       | 0          | 8                                          | 2.1516        | 0(0-Inf)                 |
| EPIGLOTTIDITIS, NOS                                    | 0                                       | 0          | 4                                          | 0.9362        | 0(0-Inf)                 |
| EPIKERATOPHAKIA                                        | 0                                       | 0          | 1                                          | 0.8528        | 0(0-Inf)                 |

| Description                                                          | No. of Positive Cases with Disease Code | Case Rate* | No. of Positive Controls with Disease Code | Control Rate* | Relative Risk (95%CI)    |
|----------------------------------------------------------------------|-----------------------------------------|------------|--------------------------------------------|---------------|--------------------------|
| EPILEPSIA PARTIALIS CONTINUA                                         | 0                                       | 0          | 3                                          | 1.5757        | 0(0-Inf)                 |
| EPILEPSY, FOCAL, MOTOR                                               | 0                                       | 0          | 6                                          | 1.4006        | 0(0-Inf)                 |
| EPILEPSY, GENERALIZED                                                | 1                                       | 7.9601     | 60                                         | 21.1495       | 0.3764(0.052-2.7218)     |
| EPILEPSY, IDIOPATHIC                                                 | 0                                       | 0          | 11                                         | 3.1337        | 0(0-Inf)                 |
| EPILEPSY, JACKSONIAN, MOTOR TYPE                                     | 0                                       | 0          | 1                                          | 0.4049        | 0(0-Inf)                 |
| EPILEPSY, JACKSONIAN, NOS                                            | 0                                       | 0          | 1                                          | 0.4048        | 0(0-Inf)                 |
| EPILEPSY, NOS, SEE ALSO CONVULSION OR SEIZURE                        | 0                                       | 0          | 48                                         | 15.3613       | 0(0-Inf)                 |
| EPILEPSY, PARTIAL                                                    | 1                                       | 8.1504     | 95                                         | 34.5466       | 0.2359(0.0328-1.6947)    |
| EPILEPSY, PARTIAL, FOCAL                                             | 0                                       | 0          | 29                                         | 6.9249        | 0(0-Inf)                 |
| EPILEPSY, PETIT MAL                                                  | 0                                       | 0          | 1                                          | 0.234         | 0(0-Inf)                 |
| EPILEPSY, PSYCHOMOTOR                                                | 0                                       | 0          | 1                                          | 2.4965        | 0(0-Inf)                 |
| EPILEPSY, SECONDARY                                                  | 1                                       | 8.1623     | 35                                         | 12.8101       | 0.6372(0.087-4.6684)     |
| EPILEPSY, SLEEP                                                      | 0                                       | 0          | 1                                          | 0.3526        | 0(0-Inf)                 |
| EPILEPSY, TEMPORAL LOBE                                              | 0                                       | 0          | 20                                         | 5.2536        | 0(0-Inf)                 |
| EPILEPSY, TRAUMATIC                                                  | 1                                       | 6.9163     | 10                                         | 2.615         | 2.6448(0.3345-20.9143)   |
| EPIPHORA, NOS                                                        | 10                                      | 96.5693    | 212                                        | 99.557        | 0.97(0.5135-1.8322)      |
| EPIPLOCELE, INCARCERATED                                             | 0                                       | 0          | 1                                          | 0.8877        | 0(0-Inf)                 |
| EPISCLERITIS, NODULAR                                                | 0                                       | 0          | 2                                          | 0.8723        | 0(0-Inf)                 |
| EPISCLERITIS, NOS                                                    | 10                                      | 75.6067    | 159                                        | 37.8703       | 1.9965(1.0505-3.7943)    |
| EPISODE, CEREBROVASCULAR, ISCHEMIC, SEE ALSO ATTACK                  | 1                                       | 8.0859     | 2                                          | 0.7123        | 11.3518(0.9865-130.6278) |
| EPISODE, THROMBOEMBOLIC                                              | 0                                       | 0          | 6                                          | 2.9089        | 0(0-Inf)                 |
| EPISODE, VASOVAGAL                                                   | 4                                       | 31.9188    | 123                                        | 42.9708       | 0.7428(0.2738-2.0152)    |
| EPISTAXIS                                                            | 0                                       | 0          | 1                                          | 0.234         | 0(0-Inf)                 |
| EPISTAXIS, NOS                                                       | 51                                      | 419.11     | 1093                                       | 392.3813      | 1.0681(0.8059-1.4156)    |
| EPISTAXIS, TRAUMATIC                                                 | 1                                       | 14.8989    | 3                                          | 2.6358        | 5.6524(0.5774-55.3357)   |
| EPITHELIOMA, BASAL CELL, CODE ALSO NEOPLASM, MALIGNANT BY SITE       | 8                                       | 75.399     | 145                                        | 65.7024       | 1.1476(0.5619-2.3436)    |
| EPITHELIOMA, BENIGN, CODE ALSO NEOPLASM, BENIGN BY SITE              | 0                                       | 0          | 3                                          | 0.746         | 0(0-Inf)                 |
| EPITHELIOMA, BOWEN'S, CODE ALSO NEOPLASM, MALIGNANT BY SITE          | 0                                       | 0          | 3                                          | 0.741         | 0(0-Inf)                 |
| EPITHELIOMA, MALHERBE'S, CODE ALSO NEOPLASM, BENIGN BY SITE          | 4                                       | 28.6811    | 19                                         | 4.5227        | 6.3415(2.1282-18.8964)   |
| EPITHELIOMA, MALIGNANT, CODE ALSO NEOPLASM, MALIGNANT BY SITE        | 0                                       | 0          | 3                                          | 1.5112        | 0(0-Inf)                 |
| EPITHELIOMA, NOS, CODE ALSO, NEOPLASM, MALIGNANT BY SITE             | 0                                       | 0          | 18                                         | 9.8866        | 0(0-Inf)                 |
| EPITHELIOMA, SQUAMOUS CELL, CODE ALSO NEOPLASM MALIGNANT BY SITE     | 0                                       | 0          | 7                                          | 3.2361        | 0(0-Inf)                 |
| EPITHELIOMA, TRANSITIONAL CELL, CODE ALSO NEOPLASM MALIGNANT BY SITE | 1                                       | 11.1467    | 14                                         | 8.163         | 1.3655(0.1784-10.4505)   |

| Description                                          | No. of Positive Cases with Disease Code | Case Rate* | No. of Positive Controls with Disease Code | Control Rate* | Relative Risk (95%CI)  |
|------------------------------------------------------|-----------------------------------------|------------|--------------------------------------------|---------------|------------------------|
| EPITHELIOPATHY, NEC                                  | 0                                       | 0          | 9                                          | 2.2142        | 0(0-Inf)               |
| EPITHELIOPATHY, NOS                                  | 0                                       | 0          | 6                                          | 1.7647        | 0(0-Inf)               |
| EPONYCHIA                                            | 0                                       | 0          | 2                                          | 0.4681        | 0(0-Inf)               |
| EPULIS, FISSURATUM                                   | 1                                       | 6.9811     | 21                                         | 5.5006        | 1.2692(0.1694-9.5062)  |
| EPULIS, GRANULOMATA                                  | 0                                       | 0          | 1                                          | 0.234         | 0(0-Inf)               |
| EPULIS, NOS                                          | 1                                       | 9.2196     | 11                                         | 4.8551        | 1.8989(0.2426-14.8629) |
| EROSIO INTERDIGITALIS BLASTOMYCETICA                 | 0                                       | 0          | 1                                          | 0.8528        | 0(0-Inf)               |
| EROSION, ANTRAL, MULTIPLE SUPERFICIAL                | 1                                       | 6.9443     | 11                                         | 2.7883        | 2.4905(0.317-19.5653)  |
| EROSION, ANTRAL, NOS                                 | 27                                      | 229.2227   | 793                                        | 305.6117      | 0.75(0.5106-1.1017)    |
| EROSION, ANTRAL, SUPERFICIAL                         | 0                                       | 0          | 10                                         | 3.2843        | 0(0-Inf)               |
| EROSION, ARTERY                                      | 0                                       | 0          | 1                                          | 2.4866        | 0(0-Inf)               |
| EROSION, BONE                                        | 0                                       | 0          | 14                                         | 3.5697        | 0(0-Inf)               |
| EROSION, BULBAR                                      | 0                                       | 0          | 35                                         | 16.0744       | 0(0-Inf)               |
| EROSION, CAMERON                                     | 7                                       | 69.9073    | 94                                         | 47.0025       | 1.4873(0.6879-3.2157)  |
| EROSION, CARTILAGE                                   | 0                                       | 0          | 6                                          | 1.5038        | 0(0-Inf)               |
| EROSION, CERVICAL                                    | 2                                       | 32.3007    | 54                                         | 17.5755       | 1.8378(0.4467-7.5615)  |
| EROSION, CORNEA                                      | 3                                       | 26.3545    | 147                                        | 36.7017       | 0.7181(0.2285-2.2567)  |
| EROSION, CORNEA, RECURRENT                           | 1                                       | 6.9518     | 66                                         | 16.0588       | 0.4329(0.0599-3.1262)  |
| EROSION, CORNEA, TRAUMATIC                           | 0                                       | 0          | 2                                          | 0.5069        | 0(0-Inf)               |
| EROSION, DENTAL                                      | 0                                       | 0          | 12                                         | 4.0157        | 0(0-Inf)               |
| EROSION, DUODENAL                                    | 11                                      | 94.7925    | 234                                        | 93.265        | 1.0164(0.5542-1.8639)  |
| EROSION, ESOPHAGUS                                   | 6                                       | 49.0726    | 113                                        | 41.123        | 1.1933(0.5235-2.7201)  |
| EROSION, GASTRIC                                     | 18                                      | 153.7801   | 268                                        | 103.7835      | 1.4817(0.9176-2.3927)  |
| EROSION, GASTRIC, MULTIPLE                           | 1                                       | 7.4493     | 18                                         | 5.5281        | 1.3475(0.1784-10.1773) |
| EROSION, GASTRIC, SUPERFICIAL                        | 0                                       | 0          | 4                                          | 1.1513        | 0(0-Inf)               |
| EROSION, GASTRIC, WITH HEMORRHAGE                    | 0                                       | 0          | 3                                          | 1.9037        | 0(0-Inf)               |
| EROSION, INTESTINE, NEC                              | 2                                       | 16.5778    | 20                                         | 7.5243        | 2.2032(0.5109-9.5018)  |
| EROSION, STOMACH, NOS                                | 4                                       | 36.7838    | 73                                         | 31.996        | 1.1496(0.4189-3.1553)  |
| EROSION, TOOTH                                       | 1                                       | 7.7809     | 14                                         | 4.7013        | 1.6551(0.2156-12.7059) |
| EROSION, URETHRA                                     | 1                                       | 9.3459     | 6                                          | 2.7232        | 3.432(0.407-28.9374)   |
| ERROR, REFRACTIVE                                    | 61                                      | 465.5279   | 2108                                       | 652.4834      | 0.7135(0.5528-0.9208)  |
| ERROR, REFRACTIVE ASTIGMATISM                        | 0                                       | 0          | 2                                          | 0.5069        | 0(0-Inf)               |
| ERROR, REFRACTIVE MYOPIA                             | 2                                       | 14.8232    | 28                                         | 8.5345        | 1.7369(0.4108-7.3439)  |
| ERROR, REFRACTIVE PRESBYOPIA                         | 6                                       | 48.1812    | 160                                        | 56.5019       | 0.8527(0.3767-1.9305)  |
| ERUCTATION                                           | 0                                       | 0          | 12                                         | 3.7041        | 0(0-Inf)               |
| ERUPTED TEETH (WISDOM TEETH, ETC.)                   | 0                                       | 0          | 8                                          | 2.817         | 0(0-Inf)               |
| ERUPTION, ACNEIFORM                                  | 2                                       | 14.9479    | 40                                         | 9.5929        | 1.5582(0.3745-6.4838)  |
| ERUPTION, ACNEIFORM DRUG                             | 0                                       | 0          | 1                                          | 0.8276        | 0(0-Inf)               |
| ERUPTION, BULLOUS                                    | 1                                       | 11.6646    | 0                                          | 0             | 8824540282.3425(0-Inf) |
| ERUPTION, DRUG, CODE ALSO EFFECT ADVERSE DRUG STATED | 5                                       | 44.2671    | 63                                         | 26.1423       | 1.6933(0.6782-4.2279)  |

| Description                                                 | No. of Positive Cases with Disease Code | Case Rate* | No. of Positive Controls with Disease Code | Control Rate* | Relative Risk (95%CI)  |
|-------------------------------------------------------------|-----------------------------------------|------------|--------------------------------------------|---------------|------------------------|
| ERUPTION, LIGHT                                             | 0                                       | 0          | 15                                         | 3.2951        | 0(0-Inf)               |
| ERUPTION, POLYMORPHOUS                                      | 0                                       | 0          | 32                                         | 7.8166        | 0(0-Inf)               |
| ERUPTION, SKIN, NOS                                         | 10                                      | 70.5021    | 226                                        | 59.0509       | 1.1939(0.6323-2.2544)  |
| ERUPTION, SKIN, VESICULAR                                   | 0                                       | 0          | 19                                         | 4.6606        | 0(0-Inf)               |
| ERYSIPELAS                                                  | 3                                       | 20.8846    | 54                                         | 13.2968       | 1.5706(0.4887-5.0481)  |
| ERYSIPELOID                                                 | 0                                       | 0          | 1                                          | 0.4048        | 0(0-Inf)               |
| ERYTHEMA, AB IGNE                                           | 0                                       | 0          | 2                                          | 0.5709        | 0(0-Inf)               |
| ERYTHEMA, ANNULARE (CENTRIFUGUM)                            | 0                                       | 0          | 6                                          | 1.3974        | 0(0-Inf)               |
| ERYTHEMA, AREATA MIGRANS                                    | 0                                       | 0          | 1                                          | 0.3526        | 0(0-Inf)               |
| ERYTHEMA, CHRONICUM MIGRANS                                 | 0                                       | 0          | 7                                          | 1.8149        | 0(0-Inf)               |
| ERYTHEMA, DYSCHROMICUM PERSTANS                             | 0                                       | 0          | 3                                          | 0.741         | 0(0-Inf)               |
| ERYTHEMA, GYRATUM                                           | 0                                       | 0          | 3                                          | 0.7175        | 0(0-Inf)               |
| ERYTHEMA, INFECTIOSUM                                       | 0                                       | 0          | 1                                          | 0.2354        | 0(0-Inf)               |
| ERYTHEMA, MULTIFORME                                        | 3                                       | 20.8317    | 54                                         | 13.3184       | 1.5641(0.4865-5.0285)  |
| ERYTHEMA, NODOSUM                                           | 2                                       | 16.2672    | 37                                         | 8.4663        | 1.9214(0.46-8.0251)    |
| ERYTHEMA, NOS (SKIN #) (INTERNAL- SEE INFLAMMATION By Site) | 26                                      | 208.1541   | 469                                        | 160.133       | 1.2999(0.8744-1.9323)  |
| ERYTHEMA, TOXIC                                             | 0                                       | 0          | 1                                          | 0.2729        | 0(0-Inf)               |
| ERYTHEMA, TOXICUM                                           | 0                                       | 0          | 1                                          | 0.2354        | 0(0-Inf)               |
| ERYTHEMA, VOCAL CORDS                                       | 1                                       | 7.7946     | 3                                          | 1.037         | 7.5164(0.7607-74.2651) |
| ERYTHRASMA                                                  | 1                                       | 6.9152     | 27                                         | 7.1799        | 0.9631(0.1302-7.1222)  |
| ERYTHREMIA, NOS                                             | 0                                       | 0          | 9                                          | 2.3113        | 0(0-Inf)               |
| ERYTHROCYTHEMIA                                             | 0                                       | 0          | 1                                          | 0.234         | 0(0-Inf)               |
| ERYTHROCYTOSIS, NOS                                         | 3                                       | 22.5243    | 70                                         | 22.0254       | 1.0226(0.3209-3.2592)  |
| ERYTHROCYTOSIS, STRESS                                      | 0                                       | 0          | 4                                          | 1.322         | 0(0-Inf)               |
| ERYTHRODERMA, NOS                                           | 1                                       | 7.1013     | 10                                         | 2.7574        | 2.5754(0.3249-20.4146) |
| ERYTHRODERMA, PSORIATICUM                                   | 0                                       | 0          | 1                                          | 0.2729        | 0(0-Inf)               |
| ERYTHROMELALGIA                                             | 1                                       | 7.4108     | 7                                          | 2.1127        | 3.5078(0.4231-29.082)  |
| ERYTHROMELANOSIS COLLI                                      | 0                                       | 0          | 1                                          | 0.234         | 0(0-Inf)               |
| ERYTHROPLAKIA OF ORAL MUCOSA                                | 1                                       | 7.6793     | 8                                          | 2.6149        | 2.9367(0.3615-23.8549) |
| ERYTHROPSIA                                                 | 0                                       | 0          | 1                                          | 0.405         | 0(0-Inf)               |
| ESCHAR                                                      | 1                                       | 11.9107    | 64                                         | 41.3215       | 0.2882(0.0399-2.0809)  |
| ESODEVIATION                                                | 0                                       | 0          | 1                                          | 0.234         | 0(0-Inf)               |
| ESOPHAGITIS, EROSIVE                                        | 7                                       | 60.8485    | 224                                        | 90.3602       | 0.6734(0.3169-1.431)   |
| ESOPHAGITIS, HEMORRHAGIC                                    | 0                                       | 0          | 2                                          | 0.432         | 0(0-Inf)               |
| ESOPHAGITIS, MONILIAL                                       | 2                                       | 18.3556    | 35                                         | 15.3794       | 1.1935(0.2857-4.9856)  |
| ESOPHAGITIS, NOS--ESO                                       | 37                                      | 292.5275   | 869                                        | 293.9821      | 0.9951(0.7154-1.3841)  |
| ESOPHAGITIS, PEPTIC                                         | 2                                       | 15.4238    | 32                                         | 10.5291       | 1.4649(0.349-6.1491)   |
| ESOPHAGITIS, POST-TRAUMATIC                                 | 0                                       | 0          | 1                                          | 0.2729        | 0(0-Inf)               |
| ESOPHAGITIS, REFLUX, NOS--ESOR                              | 46                                      | 338.5105   | 1074                                       | 310.2345      | 1.0911(0.8115-1.4671)  |



| Description                                                                               | No. of Positive Cases with Disease Code | Case Rate* | No. of Positive Controls with Disease Code | Control Rate* | Relative Risk (95%CI)  |
|-------------------------------------------------------------------------------------------|-----------------------------------------|------------|--------------------------------------------|---------------|------------------------|
| ESOPHAGITIS, ULCERATIVE                                                                   | 9                                       | 90.5644    | 108                                        | 53.8329       | 1.6823(0.85-3.3296)    |
| ESOPHORIA, ALTERNATING                                                                    | 0                                       | 0          | 1                                          | 0.234         | 0(0-Inf)               |
| ESOPHORIA, NOS                                                                            | 1                                       | 8.0756     | 38                                         | 13.584        | 0.5945(0.0813-4.3451)  |
| ESOTROPIA, ACCOMMODATIVE                                                                  | 0                                       | 0          | 1                                          | 0.4049        | 0(0-Inf)               |
| ESOTROPIA, ALTERNATING                                                                    | 0                                       | 0          | 3                                          | 0.6549        | 0(0-Inf)               |
| ESOTROPIA, ALTERNATING WITH V PATTERN                                                     | 0                                       | 0          | 1                                          | 0.4048        | 0(0-Inf)               |
| ESOTROPIA, INTERMITTENT                                                                   | 1                                       | 7.7134     | 9                                          | 2.9738        | 2.5938(0.3241-20.7571) |
| ESOTROPIA, NOS                                                                            | 4                                       | 28.0171    | 141                                        | 36.1676       | 0.7746(0.286-2.0978)   |
| ETHMOIDITIS                                                                               | 0                                       | 0          | 15                                         | 3.8021        | 0(0-Inf)               |
| EUTHYROID NOS                                                                             | 34                                      | 249.2349   | 984                                        | 238.8439      | 1.0435(0.7405-1.4704)  |
| EVALUATION, ADOLESCENT DRUG ABUSE SERVICE-ADAS                                            | 0                                       | 0          | 5                                          | 1.3793        | 0(0-Inf)               |
| EVALUATION, AGENCY REFERRAL (SSA DISABILITY)                                              | 0                                       | 0          | 16                                         | 4.6783        | 0(0-Inf)               |
| EVALUATION, ALCOHOL, DRUG, CHEMICAL, GAMBLER, ETC.                                        | 2                                       | 17.1665    | 27                                         | 7.0289        | 2.4423(0.5767-10.3434) |
| EVALUATION, CLINICAL ONLY - CEO OR PIO - PRIORITY INTERVIEW ONLY--CEO                     | 6                                       | 47.1513    | 84                                         | 19.9489       | 2.3636(1.0277-5.4359)  |
| EVALUATION, DISABILITY                                                                    | 1                                       | 7.1502     | 60                                         | 14.1667       | 0.5047(0.0697-3.6525)  |
| EVALUATION, GAF (YEAR)                                                                    | 0                                       | 0          | 1                                          | 0.8879        | 0(0-Inf)               |
| EVALUATION, GAS (PSYCH)                                                                   | 0                                       | 0          | 1                                          | 0.8879        | 0(0-Inf)               |
| EVALUATION, IEC / IEVC (IMPAIRMENT EVALUATION CENTER)                                     | 0                                       | 0          | 4                                          | 0.967         | 0(0-Inf)               |
| EVALUATION, JOB FITNESS                                                                   | 1                                       | 8.1372     | 60                                         | 13.9099       | 0.585(0.0808-4.2339)   |
| EVALUATION, MAYO BRAIN INJURY OUTPATIENT PROGRAM                                          | 0                                       | 0          | 4                                          | 1.03          | 0(0-Inf)               |
| EVALUATION, MENTAL HEALTH                                                                 | 24                                      | 174.3654   | 382                                        | 92.0153       | 1.895(1.252-2.8682)    |
| EVALUATION, NEC                                                                           | 36                                      | 255.3219   | 1286                                       | 340.1396      | 0.7506(0.5386-1.0462)  |
| EVALUATION, NOS                                                                           | 2                                       | 16.2351    | 44                                         | 10.4291       | 1.5567(0.3753-6.4563)  |
| EVALUATION, NURSING CARE                                                                  | 5                                       | 64.6276    | 108                                        | 80.3794       | 0.804(0.3274-1.9745)   |
| EVENT (CEREBROVASCULAR) SEE ALSO STROKE                                                   | 0                                       | 0          | 43                                         | 24.2331       | 0(0-Inf)               |
| EVENTRATION, COLON INTO CHEST, NOS                                                        | 0                                       | 0          | 1                                          | 0.8532        | 0(0-Inf)               |
| EVENTRATION, DIAPHRAGM, NOS                                                               | 0                                       | 0          | 1                                          | 0.2729        | 0(0-Inf)               |
| EVERSION, CERVIX, NOS                                                                     | 0                                       | 0          | 1                                          | 0.398         | 0(0-Inf)               |
| EVERSION, EYELID, SEE ALSO ECTROPION                                                      | 1                                       | 14.0057    | 1                                          | 0.807         | 17.3544(1.05-286.8467) |
| EVERSION, FOOT, ACQUIRED                                                                  | 0                                       | 0          | 2                                          | 1.7056        | 0(0-Inf)               |
| EVERSION, PUNCTUM LACRIMALE                                                               | 1                                       | 10.578     | 3                                          | 1.658         | 6.3799(0.646-63.0058)  |
| EVERSION, URETHRA                                                                         | 0                                       | 0          | 1                                          | 0.4049        | 0(0-Inf)               |
| EVISGERATION, OPERATIVE WOUND                                                             | 2                                       | 15.1146    | 4                                          | 1.3271        | 11.389(2.0378-63.6525) |
| EXAMINATION, ABNORMAL/POSITIVE RESPONSE TO EXERCISE (TEST), CODE ALSO CONDITION IF STATED | 0                                       | 0          | 14                                         | 4.434         | 0(0-Inf)               |
| EXAMINATION, ADOPTION                                                                     | 0                                       | 0          | 12                                         | 9.294         | 0(0-Inf)               |
| EXAMINATION, AIRLINE PILOT, NWA, NCA, OZARK, ETC.                                         | 0                                       | 0          | 12                                         | 5.6306        | 0(0-Inf)               |
| EXAMINATION, ANGIOGRAM, NEC/NOS                                                           | 0                                       | 0          | 65                                         | 23.8759       | 0(0-Inf)               |
| EXAMINATION, ANNUAL                                                                       | 24                                      | 188.7694   | 758                                        | 181.9896      | 1.0373(0.6901-1.5591)  |

| Description                                                               | No. of Positive Cases with Disease Code | Case Rate* | No. of Positive Controls with Disease Code | Control Rate* | Relative Risk (95%CI)  |
|---------------------------------------------------------------------------|-----------------------------------------|------------|--------------------------------------------|---------------|------------------------|
| EXAMINATION, ARTERIOGRAM, NEC/NOS                                         | 0                                       | 0          | 11                                         | 2.8616        | 0(0-Inf)               |
| EXAMINATION, ATHLETICS                                                    | 1                                       | 7.1614     | 9                                          | 2.2522        | 3.1797(0.3973-25.4495) |
| EXAMINATION, AUTONOMIC REFLEX SCREEN                                      | 5                                       | 40.6455    | 80                                         | 28.7726       | 1.4126(0.5703-3.4991)  |
| EXAMINATION, BIOPSY, LIVER                                                | 2                                       | 14.1429    | 8                                          | 2.1834        | 6.4775(1.3465-31.1615) |
| EXAMINATION, BIOPSY, NEC                                                  | 41                                      | 349.1242   | 1370                                       | 532.3654      | 0.6558(0.4804-0.8953)  |
| EXAMINATION, BIOPSY, RENAL                                                | 1                                       | 7.056      | 22                                         | 5.4475        | 1.2953(0.1735-9.67)    |
| EXAMINATION, BLOOD PRESSURE                                               | 10                                      | 71.1315    | 224                                        | 53.9487       | 1.3185(0.6982-2.49)    |
| EXAMINATION, BREAST                                                       | 20                                      | 140.2373   | 824                                        | 199.6905      | 0.7023(0.4502-1.0955)  |
| EXAMINATION, BRONCHOSCOPY                                                 | 9                                       | 65.9482    | 157                                        | 47.1567       | 1.3985(0.7125-2.7451)  |
| EXAMINATION, CAMP                                                         | 0                                       | 0          | 11                                         | 3.374         | 0(0-Inf)               |
| EXAMINATION, CARDIAC RECHECK (CARDIOVASCULAR HEALTH CLINIC FOR THE YOUNG) | 1                                       | 7.2091     | 15                                         | 4.5034        | 1.6008(0.2098-12.2159) |
| EXAMINATION, CARDIAC, CATHETERIZATION                                     | 3                                       | 22.3306    | 52                                         | 16.1684       | 1.3811(0.4294-4.4419)  |
| EXAMINATION, CARDIAC, CORONARY ANGIOGRAM                                  | 4                                       | 31.2665    | 113                                        | 38.4718       | 0.8127(0.2991-2.2081)  |
| EXAMINATION, CARDIAC, CORONARY ARTERIOGRAPHY                              | 11                                      | 80.6372    | 201                                        | 49.7222       | 1.6218(0.8818-2.9827)  |
| EXAMINATION, CARDIAC, NEGATIVE                                            | 16                                      | 115.5827   | 444                                        | 109.0941      | 1.0595(0.6425-1.747)   |
| EXAMINATION, CARDIAC, NOS                                                 | 40                                      | 298.7866   | 1323                                       | 404.3114      | 0.739(0.5392-1.0128)   |
| EXAMINATION, CARDIAC, POSITIVE                                            | 0                                       | 0          | 18                                         | 7.6065        | 0(0-Inf)               |
| EXAMINATION, CHOLANGIO(PANCREATO)GRAM                                     | 0                                       | 0          | 102                                        | 42.2993       | 0(0-Inf)               |
| EXAMINATION, CLASS I                                                      | 3                                       | 100.7157   | 69                                         | 39.747        | 2.5339(0.7961-8.0649)  |
| EXAMINATION, CLASS II                                                     | 3                                       | 75.6046    | 225                                        | 102.0885      | 0.7406(0.2369-2.3153)  |
| EXAMINATION, CLASS III                                                    | 0                                       | 0          | 19                                         | 5.9703        | 0(0-Inf)               |
| EXAMINATION, COLLEGE                                                      | 0                                       | 0          | 11                                         | 5.6089        | 0(0-Inf)               |
| EXAMINATION, COLONOSCOPY                                                  | 66                                      | 519.6369   | 2067                                       | 694.3192      | 0.7484(0.5854-0.9568)  |
| EXAMINATION, COLPOSCOPY                                                   | 3                                       | 26.4144    | 112                                        | 25.2894       | 1.0445(0.3309-3.2971)  |
| EXAMINATION, CONTROL                                                      | 0                                       | 0          | 1                                          | 0.2354        | 0(0-Inf)               |
| EXAMINATION, CYSTOSCOPY                                                   | 113                                     | 1004.628   | 2125                                       | 785.344       | 1.2792(1.0581-1.5465)  |
| EXAMINATION, DENTAL, NEGATIVE                                             | 21                                      | 171.2214   | 626                                        | 150.9139      | 1.1346(0.7335-1.7548)  |
| EXAMINATION, DENTAL, NOS--EDNT                                            | 138                                     | 2075.171   | 3562                                       | 1293.0552     | 1.6049(1.3532-1.9033)  |
| EXAMINATION, DENTAL, POSITIVE--DNTP                                       | 99                                      | 864.1912   | 2422                                       | 639.458       | 1.3514(1.1048-1.6532)  |
| EXAMINATION, DRIVER'S LICENSE                                             | 7                                       | 48.5797    | 287                                        | 78.5791       | 0.6182(0.2918-1.3099)  |
| EXAMINATION, ECHO(CARDIOGRAM)                                             | 31                                      | 246.481    | 763                                        | 262.9448      | 0.9374(0.6539-1.3438)  |
| EXAMINATION, EEG                                                          | 0                                       | 0          | 6                                          | 1.4822        | 0(0-Inf)               |
| EXAMINATION, EKG/ECG                                                      | 7                                       | 48.7971    | 147                                        | 37.4251       | 1.3039(0.6091-2.7909)  |
| EXAMINATION, ELECTROMYOGRAM--EMG                                          | 121                                     | 1014.624   | 2988                                       | 802.844       | 1.2638(1.0531-1.5166)  |
| EXAMINATION, EMG, POSITIVE                                                | 0                                       | 0          | 65                                         | 31.2297       | 0(0-Inf)               |
| EXAMINATION, EMI, HEAD (BRAIN)--EMIH (CT SCAN)                            | 149                                     | 1231.79    | 3359                                       | 980.7202      | 1.256(1.0653-1.4808)   |
| EXAMINATION, EMI, NOS--EMI (CT SCAN)                                      | 8                                       | 73.1608    | 139                                        | 36.0769       | 2.0279(0.9913-4.1485)  |
| EXAMINATION, EMI, OTHER PART OF BODY--EMIP (CT SCAN)                      | 135                                     | 1083.104   | 3176                                       | 909.3608      | 1.1911(1.002-1.4157)   |

| Description                                               | No. of Positive Cases with Disease Code | Case Rate* | No. of Positive Controls with Disease Code | Control Rate* | Relative Risk (95%CI)  |
|-----------------------------------------------------------|-----------------------------------------|------------|--------------------------------------------|---------------|------------------------|
| EXAMINATION, EMPLOYEE, MAYO CLINIC NOT FAMILY MEMBERS--CE | 45                                      | 773.3812   | 1579                                       | 598.5648      | 1.2921(0.9601-1.7388)  |
| EXAMINATION, EMPLOYEE, METHODIST--EXM                     | 4                                       | 42.2709    | 174                                        | 46.0853       | 0.9172(0.3398-2.4762)  |
| EXAMINATION, EMPLOYEE, NEC                                | 5                                       | 73.5737    | 123                                        | 47.3265       | 1.5546(0.6344-3.8093)  |
| EXAMINATION, EMPLOYEE, ST. MARYS--EXST                    | 13                                      | 199.7745   | 547                                        | 180.6839      | 1.1057(0.6373-1.9182)  |
| EXAMINATION, EMPLOYMENT                                   | 1                                       | 8.2136     | 165                                        | 40.3163       | 0.2037(0.0285-1.4559)  |
| EXAMINATION, ENT, NEGATIVE                                | 38                                      | 280.8214   | 1393                                       | 347.6935      | 0.8077(0.5847-1.1156)  |
| EXAMINATION, ENT, NOS                                     | 10                                      | 70.0091    | 304                                        | 77.3383       | 0.9052(0.4813-1.7024)  |
| EXAMINATION, ENT, POSITIVE                                | 0                                       | 0          | 12                                         | 2.9389        | 0(0-Inf)               |
| EXAMINATION, ENTEROSCOPY (SMALL INTESTINE)                | 0                                       | 0          | 9                                          | 2.4054        | 0(0-Inf)               |
| EXAMINATION, ESOPHAGOGASTROSCOPY                          | 52                                      | 405.2209   | 1144                                       | 366.4923      | 1.1057(0.8366-1.4612)  |
| EXAMINATION, ESOPHAGOSCOPY                                | 1                                       | 7.3192     | 16                                         | 4.7582        | 1.5382(0.2021-11.7053) |
| EXAMINATION, EXECUTIVE--EXEC                              | 0                                       | 0          | 20                                         | 6.1537        | 0(0-Inf)               |
| EXAMINATION, EXERCISE, SEE ALSO TREADMILL                 | 0                                       | 0          | 1                                          | 0.2354        | 0(0-Inf)               |
| EXAMINATION, EYE, CONTACTS--CONT                          | 8                                       | 168.6756   | 513                                        | 220.103       | 0.7663(0.381-1.5415)   |
| EXAMINATION, EYE, NEGATIVE                                | 18                                      | 176.9788   | 677                                        | 183.6329      | 0.9638(0.6029-1.5406)  |
| EXAMINATION, EYE, NOS                                     | 63                                      | 492.4271   | 1678                                       | 529.0093      | 0.9308(0.7233-1.1979)  |
| EXAMINATION, EYE, POSITIVE                                | 1                                       | 7.2117     | 30                                         | 7.3435        | 0.9821(0.1332-7.2379)  |
| EXAMINATION, FAA                                          | 2                                       | 24.3619    | 87                                         | 30.5126       | 0.7984(0.1962-3.2491)  |
| EXAMINATION, FOLLOW-UP--EXFU                              | 63                                      | 532.5596   | 2060                                       | 791.1054      | 0.6732(0.5236-0.8654)  |
| EXAMINATION, GASTROSCOPY                                  | 0                                       | 0          | 9                                          | 2.3846        | 0(0-Inf)               |
| EXAMINATION, GENERAL HEALTH MAINTENANCE/MANAGEMENT        | 255                                     | 2384.642   | 9008                                       | 3971.1399     | 0.6005(0.5301-0.6803)  |
| EXAMINATION, GENERAL MEDICAL(ROUTINE)                     | 58                                      | 462.707    | 1975                                       | 683.9498      | 0.6765(0.5208-0.8789)  |
| EXAMINATION, GYNECOLOGIC, NEGATIVE--GYNN                  | 65                                      | 1204.261   | 3400                                       | 1503.0653     | 0.8012(0.6266-1.0244)  |
| EXAMINATION, GYNECOLOGIC, NOS--GYN                        | 46                                      | 678.6824   | 2088                                       | 680.3269      | 0.9976(0.7444-1.3368)  |
| EXAMINATION, GYNECOLOGIC, POSITIVE                        | 1                                       | 13.8183    | 24                                         | 11.0849       | 1.2466(0.1673-9.2896)  |
| EXAMINATION, HAZARDOUS (WASTE) MATERIAL (ANY EMPLOYEE)    | 0                                       | 0          | 9                                          | 2.4565        | 0(0-Inf)               |
| EXAMINATION, HEARING, NEGATIVE                            | 2                                       | 13.8744    | 55                                         | 13.5177       | 1.0264(0.2493-4.2256)  |
| EXAMINATION, HEARING, NOS                                 | 32                                      | 261.9501   | 721                                        | 259.5103      | 1.0094(0.7077-1.4397)  |
| EXAMINATION, HEARING, POSITIVE                            | 1                                       | 7.5124     | 15                                         | 4.7103        | 1.5949(0.2087-12.1871) |
| EXAMINATION, ICU FOLLOW-UP                                | 0                                       | 0          | 3                                          | 2.6657        | 0(0-Inf)               |
| EXAMINATION, IMMIGRANT / IMMIGRATION                      | 0                                       | 0          | 1                                          | 0.3526        | 0(0-Inf)               |
| EXAMINATION, INCOMPLETE--EXIC                             | 121                                     | 1056.431   | 3594                                       | 987.5673      | 1.0697(0.892-1.2828)   |
| EXAMINATION, INFERTILITY (FEMALE)                         | 0                                       | 0          | 2                                          | 1.2659        | 0(0-Inf)               |
| EXAMINATION, INSURANCE                                    | 7                                       | 81.003     | 148                                        | 46.9471       | 1.7254(0.8065-3.6911)  |
| EXAMINATION, JOB FITNESS                                  | 3                                       | 27.5108    | 62                                         | 15.1558       | 1.8152(0.5671-5.8099)  |
| EXAMINATION, LABORATORY, NEGATIVE                         | 27                                      | 193.6227   | 567                                        | 141.4823      | 1.3685(0.9288-2.0164)  |
| EXAMINATION, LABORATORY, NOS--LAB                         | 213                                     | 2063.651   | 5724                                       | 1758.8713     | 1.1733(1.0229-1.3458)  |
| EXAMINATION, LABORATORY, POSITIVE                         | 5                                       | 48.3748    | 43                                         | 20.4455       | 2.366(0.932-6.0064)    |

| Description                                                                      | No. of Positive Cases with Disease Code | Case Rate* | No. of Positive Controls with Disease Code | Control Rate* | Relative Risk (95%CI) |
|----------------------------------------------------------------------------------|-----------------------------------------|------------|--------------------------------------------|---------------|-----------------------|
| EXAMINATION, METHODIST NURSE, RN, LPN, NURSE AIDE                                | 0                                       | 0          | 14                                         | 11.7282       | 0(0-Inf)              |
| EXAMINATION, MILITARY (ANY BRANCH OF ARMED FORCES)                               | 0                                       | 0          | 5                                          | 1.6013        | 0(0-Inf)              |
| EXAMINATION, MRI, HEAD (BRAIN)-MRIH                                              | 37                                      | 288.4303   | 710                                        | 227.5075      | 1.2678(0.9099-1.7664) |
| EXAMINATION, MRI, NOS-MRI                                                        | 10                                      | 143.8276   | 101                                        | 83.7775       | 1.7168(0.8945-3.2949) |
| EXAMINATION, MRI, OTHER PART OF BODY-MRIP                                        | 37                                      | 269.7684   | 1036                                       | 259.5018      | 1.0396(0.7482-1.4444) |
| EXAMINATION, NEC                                                                 | 39                                      | 294.8298   | 1198                                       | 370.2963      | 0.7962(0.5783-1.0961) |
| EXAMINATION, NEC, NEGATIVE                                                       | 105                                     | 809.7837   | 3796                                       | 1182.0705     | 0.6851(0.5641-0.832)  |
| EXAMINATION, NEC, POSITIVE                                                       | 19                                      | 185.6028   | 566                                        | 276.854       | 0.6704(0.4241-1.0597) |
| EXAMINATION, NEGATIVE, GENERAL--ENEG                                             | 112                                     | 1249.55    | 3510                                       | 1080.0843     | 1.1569(0.958-1.3971)  |
| EXAMINATION, NEURO, NEGATIVE--NEUN                                               | 18                                      | 128.4411   | 491                                        | 120.2726      | 1.0679(0.6663-1.7117) |
| EXAMINATION, NEURO, NOS                                                          | 6                                       | 48.5222    | 129                                        | 46.2611       | 1.0489(0.4615-2.384)  |
| EXAMINATION, NEURO, POSITIVE                                                     | 0                                       | 0          | 7                                          | 2.126         | 0(0-Inf)              |
| EXAMINATION, NEUROPSYCHOLOGICAL TESTING, (NO DIAGNOSIS)                          | 15                                      | 152.2196   | 247                                        | 124.9783      | 1.218(0.722-2.0547)   |
| EXAMINATION, NOS                                                                 | 6                                       | 42.225     | 100                                        | 26.3117       | 1.6048(0.7014-3.6715) |
| EXAMINATION, NURSES EVALUATION                                                   | 25                                      | 213.4096   | 884                                        | 344.846       | 0.6189(0.4156-0.9216) |
| EXAMINATION, OSHA                                                                | 0                                       | 0          | 3                                          | 0.8187        | 0(0-Inf)              |
| EXAMINATION, OTHERWISE NEGATIVE                                                  | 17                                      | 148.9156   | 498                                        | 203.613       | 0.7314(0.4506-1.1872) |
| EXAMINATION, OTJI                                                                | 0                                       | 0          | 4                                          | 0.9362        | 0(0-Inf)              |
| EXAMINATION, PERIODIC                                                            | 11                                      | 94.6694    | 222                                        | 54.63         | 1.7329(0.9436-3.1826) |
| EXAMINATION, PERIODIC, MAYO CLINIC--EXMP                                         | 29                                      | 441.2236   | 1047                                       | 366.7596      | 1.203(0.8312-1.7412)  |
| EXAMINATION, PILOT, SPECIAL                                                      | 0                                       | 0          | 2                                          | 0.5458        | 0(0-Inf)              |
| EXAMINATION, POST-OPERATIVE--EXPO                                                | 109                                     | 906.8696   | 3572                                       | 1275.9719     | 0.7107(0.5872-0.8603) |
| EXAMINATION, POSTPARTUM, FOLLOW-UP, ROUTINE--EXPP                                | 2                                       | 190.0171   | 128                                        | 175.6216      | 1.082(0.2676-4.3739)  |
| EXAMINATION, PREANESTHESIA--PAME                                                 | 100                                     | 769.0223   | 3492                                       | 1057.8594     | 0.727(0.5957-0.8872)  |
| EXAMINATION, PRE-EMPLOYMENT, MAYO CLINIC ENTRANCE EXAM--EXPC                     | 12                                      | 283.5542   | 574                                        | 251.2795      | 1.1284(0.6366-2.0004) |
| EXAMINATION, PRE-EMPLOYMENT, METHODIST HOSPITAL--EXPM                            | 1                                       | 21.3387    | 100                                        | 40.6633       | 0.5248(0.0731-3.7649) |
| EXAMINATION, PRE-EMPLOYMENT, ST. MARY'S HOSPITAL--EXPS                           | 9                                       | 183.5838   | 277                                        | 109.0054      | 1.6842(0.8661-3.2748) |
| EXAMINATION, PREGNANCY TEST                                                      | 0                                       | 0          | 20                                         | 19.702        | 0(0-Inf)              |
| EXAMINATION, PREGNANCY TEST POSITIVE                                             | 0                                       | 0          | 2                                          | 1.1379        | 0(0-Inf)              |
| EXAMINATION, PREGNANCY UNCONFIRMED                                               | 0                                       | 0          | 2                                          | 1.1375        | 0(0-Inf)              |
| EXAMINATION, PREMARITAL                                                          | 0                                       | 0          | 3                                          | 1.6183        | 0(0-Inf)              |
| EXAMINATION, PROCTOSCOPY, NEGATIVE--EPRO                                         | 9                                       | 68.2148    | 312                                        | 75.663        | 0.9016(0.464-1.7518)  |
| EXAMINATION, PROCTOSCOPY, NOS--PROC                                              | 11                                      | 91.013     | 364                                        | 94.7468       | 0.9606(0.5266-1.7523) |
| EXAMINATION, PROCTOSCOPY, POSITIVE                                               | 0                                       | 0          | 11                                         | 3.0287        | 0(0-Inf)              |
| EXAMINATION, PSI - BEHAVIORAL MEDICINE / PAIN MANAGEMENT (PERSONALITY LAB)(L 11) | 5                                       | 48.7422    | 180                                        | 87.5377       | 0.5568(0.2286-1.3561) |
| EXAMINATION, PSYCHIATRIC, GENERAL                                                | 1                                       | 7.9402     | 27                                         | 6.725         | 1.1807(0.1596-8.7344) |
| EXAMINATION, PSYCHOLOGICAL, NOS--PSI                                             | 91                                      | 701.2082   | 2104                                       | 547.1365      | 1.2816(1.0383-1.5819) |

| Description                                                    | No. of Positive Cases with Disease Code | Case Rate* | No. of Positive Controls with Disease Code | Control Rate* | Relative Risk (95%CI)  |
|----------------------------------------------------------------|-----------------------------------------|------------|--------------------------------------------|---------------|------------------------|
| EXAMINATION, PSYCHOLOGY, NEURO-COGNITIVE TESTING               | 17                                      | 198.2371   | 204                                        | 125.714       | 1.5769(0.9596-2.5912)  |
| EXAMINATION, PUPILLOGRAPHY                                     | 0                                       | 0          | 1                                          | 0.3526        | 0(0-Inf)               |
| EXAMINATION, RADIOLOGIC, NEGATIVE                              | 41                                      | 300.1351   | 1438                                       | 357.4742      | 0.8396(0.615-1.1461)   |
| EXAMINATION, RADIOLOGIC, NOS--XRAY                             | 80                                      | 612.9569   | 2553                                       | 655.2737      | 0.9354(0.7483-1.1693)  |
| EXAMINATION, RADIOLOGIC, POSITIVE                              | 3                                       | 25.2914    | 109                                        | 41.7694       | 0.6055(0.1919-1.9109)  |
| EXAMINATION, REFUGEE                                           | 0                                       | 0          | 3                                          | 0.9165        | 0(0-Inf)               |
| EXAMINATION, RESIDENT, MAYO CLINIC, NOT FAMILY MEMBERS         | 0                                       | 0          | 13                                         | 9.3885        | 0(0-Inf)               |
| EXAMINATION, RESPIRATOR                                        | 0                                       | 0          | 32                                         | 8.8545        | 0(0-Inf)               |
| EXAMINATION, SCHOOL                                            | 0                                       | 0          | 22                                         | 8.0783        | 0(0-Inf)               |
| EXAMINATION, SCREENING, EYE, OTHER                             | 0                                       | 0          | 2                                          | 0.5069        | 0(0-Inf)               |
| EXAMINATION, SCREENING, GLAUCOMA                               | 0                                       | 0          | 8                                          | 2.2049        | 0(0-Inf)               |
| EXAMINATION, SICK CALL VISIT--SC                               | 43                                      | 783.8567   | 1442                                       | 565.6631      | 1.3857(1.0225-1.878)   |
| EXAMINATION, SIGMOIDOSCOPY                                     | 2                                       | 14.086     | 144                                        | 39.19         | 0.3594(0.0889-1.4531)  |
| EXAMINATION, SPECIAL, ADPC (ALZHEIMER DISEASE PATIENT CONTROL) | 43                                      | 668.5547   | 844                                        | 768.0843      | 0.8704(0.6403-1.1833)  |
| EXAMINATION, SPECIAL, ANESTHESIA                               | 0                                       | 0          | 1                                          | 0.234         | 0(0-Inf)               |
| EXAMINATION, SPECIAL, ASBESTOS MEDICAL SURVEILLANCE            | 0                                       | 0          | 6                                          | 1.5935        | 0(0-Inf)               |
| EXAMINATION, SPECIAL, CALCIUM UROLITHIASIS STUDY               | 0                                       | 0          | 8                                          | 2.7113        | 0(0-Inf)               |
| EXAMINATION, SPECIAL, CAROTID BRUIT STUDY (CAROTID MACE)       | 7                                       | 50.9539    | 165                                        | 40.321        | 1.2637(0.5917-2.699)   |
| EXAMINATION, SPECIAL, CLINICAL RESEARCH--EXCR                  | 104                                     | 843.8278   | 3026                                       | 995.5391      | 0.8476(0.6967-1.0311)  |
| EXAMINATION, SPECIAL, CONTROL                                  | 10                                      | 100.9832   | 167                                        | 83.3673       | 1.2113(0.6385-2.2979)  |
| EXAMINATION, SPECIAL, COPD STUDY                               | 1                                       | 7.7778     | 43                                         | 11.2502       | 0.6914(0.095-5.0335)   |
| EXAMINATION, SPECIAL, DIABETES - DCCT                          | 0                                       | 0          | 8                                          | 1.9846        | 0(0-Inf)               |
| EXAMINATION, SPECIAL, DIABETES--EXDM                           | 17                                      | 121.7377   | 464                                        | 114.4467      | 1.0637(0.6547-1.7283)  |
| EXAMINATION, SPECIAL, G.I. STUDY--EXGI                         | 6                                       | 48.1336    | 183                                        | 44.6035       | 1.0791(0.4775-2.4389)  |
| EXAMINATION, SPECIAL, GALLSTONE                                | 0                                       | 0          | 12                                         | 2.8585        | 0(0-Inf)               |
| EXAMINATION, SPECIAL, HYPERTENSION                             | 4                                       | 31.5172    | 92                                         | 22.6056       | 1.3942(0.5107-3.8064)  |
| EXAMINATION, SPECIAL, MAYO LUNG PROJECT                        | 0                                       | 0          | 13                                         | 3.7217        | 0(0-Inf)               |
| EXAMINATION, SPECIAL, NEC--EXSP                                | 173                                     | 1446.323   | 5277                                       | 1810.2957     | 0.7989(0.6864-0.9299)  |
| EXAMINATION, SPECIAL, NORMAL VOLUNTEER--EXNV                   | 45                                      | 328.8544   | 1379                                       | 365.7884      | 0.899(0.6675-1.2108)   |
| EXAMINATION, SPECIAL, PAD STUDY                                | 7                                       | 50.3354    | 104                                        | 25.3367       | 1.9867(0.9207-4.2868)  |
| EXAMINATION, SPECIAL, ROCSA STUDY                              | 1                                       | 26.1407    | 5                                          | 8.7759        | 2.9787(0.3459-25.6513) |
| EXAMINATION, SPEECH PATHOLOGIST                                | 10                                      | 74.4785    | 265                                        | 81.071        | 0.9187(0.4877-1.7304)  |
| EXAMINATION, ST. MARY'S NURSE, RN, LPN, AND AIDE               | 0                                       | 0          | 8                                          | 3.4738        | 0(0-Inf)               |
| EXAMINATION, ST. MARY'S STUDENT NURSE, LPN, DIETETIC INTERN    | 0                                       | 0          | 2                                          | 0.8723        | 0(0-Inf)               |
| EXAMINATION, STAFF, MAYO CLINIC, NOT FAMILY MEMBERS            | 4                                       | 67.3386    | 234                                        | 103.4241      | 0.6511(0.2421-1.751)   |
| EXAMINATION, STILBESTROL-DES EXPOSURE                          | 0                                       | 0          | 2                                          | 0.4708        | 0(0-Inf)               |
| EXAMINATION, STILBESTROL-DES FOLLOW-UP                         | 0                                       | 0          | 1                                          | 0.234         | 0(0-Inf)               |

| Description                                                       | No. of Positive Cases with Disease Code | Case Rate* | No. of Positive Controls with Disease Code | Control Rate* | Relative Risk (95%CI) |
|-------------------------------------------------------------------|-----------------------------------------|------------|--------------------------------------------|---------------|-----------------------|
| EXAMINATION, STILBESTROL-DES, NEGATIVE GYNECOLOGIC EXAMINATION    | 0                                       | 0          | 9                                          | 7.4825        | 0(0-Inf)              |
| EXAMINATION, STILBESTROL-DES, NOS                                 | 0                                       | 0          | 15                                         | 14.1277       | 0(0-Inf)              |
| EXAMINATION, STILBESTROL-DES, POSITIVE GYNECOLOGIC EXAMINATION    | 0                                       | 0          | 2                                          | 1.6551        | 0(0-Inf)              |
| EXAMINATION, STUDENT, MAYO CLINIC                                 | 0                                       | 0          | 6                                          | 2.3966        | 0(0-Inf)              |
| EXAMINATION, STUDENT, RCC                                         | 0                                       | 0          | 5                                          | 3.9075        | 0(0-Inf)              |
| EXAMINATION, THERMOREGULATORY LAB                                 | 2                                       | 14.7443    | 44                                         | 13.2768       | 1.1105(0.268-4.6019)  |
| EXAMINATION, TRAVEL / TRAVELER'S                                  | 16                                      | 115.8312   | 674                                        | 196.2836      | 0.5901(0.3591-0.9697) |
| EXAMINATION, TREADMILL, NEGATIVE                                  | 17                                      | 121.8106   | 420                                        | 105.2644      | 1.1572(0.7115-1.882)  |
| EXAMINATION, TREADMILL, NOS                                       | 2                                       | 14.1426    | 120                                        | 30.3463       | 0.466(0.115-1.8879)   |
| EXAMINATION, TREADMILL, POSITIVE                                  | 10                                      | 74.3997    | 506                                        | 158.6193      | 0.469(0.2506-0.8778)  |
| EXAMINATION, ULTRASOUND--EXUL                                     | 257                                     | 2445.837   | 6343                                       | 2132.3117     | 1.147(1.0121-1.2999)  |
| EXAMINATION, UNRESTRICTED (NORMAL) WORK CLEARANCE                 | 0                                       | 0          | 46                                         | 12.0485       | 0(0-Inf)              |
| EXAMINATION, VISION AND/OR HEARING CHECK (CHILD)                  | 0                                       | 0          | 5                                          | 4.6017        | 0(0-Inf)              |
| EXAMINATION, WELL BABY / WELL CHILD--WC                           | 0                                       | 0          | 9                                          | 2.2114        | 0(0-Inf)              |
| EXANTHEM, NOS, SEE ALSO RASH                                      | 0                                       | 0          | 7                                          | 1.6208        | 0(0-Inf)              |
| EXANTHEM, VIRAL, NOS                                              | 2                                       | 16.6575    | 34                                         | 8.2002        | 2.0313(0.4848-8.5118) |
| EXCESS, BREAST, DEVELOPMENT                                       | 0                                       | 0          | 1                                          | 0.234         | 0(0-Inf)              |
| EXCESS, EATING                                                    | 0                                       | 0          | 1                                          | 1.9084        | 0(0-Inf)              |
| EXCESS, FLUID OR WATER (EXTRACELLULAR)                            | 1                                       | 8.0125     | 18                                         | 6.3336        | 1.2651(0.1676-9.5496) |
| EXCESS, SALIVATION                                                | 0                                       | 0          | 9                                          | 6.2321        | 0(0-Inf)              |
| EXCESS, SECRETION, MEIBOMIAN                                      | 0                                       | 0          | 1                                          | 0.4751        | 0(0-Inf)              |
| EXCESS, TEARING                                                   | 2                                       | 19.1341    | 94                                         | 43.8633       | 0.4362(0.1073-1.7732) |
| EXCESS, THIRST                                                    | 3                                       | 22.6759    | 52                                         | 16.3679       | 1.3854(0.4305-4.4585) |
| EXCESSIVE FETUS COMPLICATING DELIVERY                             | 0                                       | 0          | 2                                          | 0.7961        | 0(0-Inf)              |
| EXCORIATION, NEUROTIC                                             | 3                                       | 20.9481    | 78                                         | 19.1598       | 1.0933(0.3439-3.4762) |
| EXCORIATION, NOS, CODE ALSO INJURY, SUPERFICIAL BY SITE IF STATED | 14                                      | 112.6311   | 297                                        | 103.1689      | 1.0917(0.6377-1.8691) |
| EXCYCLOTROPIA                                                     | 0                                       | 0          | 2                                          | 0.8096        | 0(0-Inf)              |
| EXERCISE PROGRAM                                                  | 3                                       | 22.996     | 27                                         | 9.0216        | 2.549(0.7678-8.4624)  |
| EXFOLIATION (EYE DIAGNOSIS, NOS)                                  | 2                                       | 24.3468    | 33                                         | 22.3975       | 1.087(0.2598-4.5479)  |
| EXFOLIATRIX                                                       | 0                                       | 0          | 1                                          | 0.3527        | 0(0-Inf)              |
| EXHAUSTION, DUE TO OVEREXERTION                                   | 0                                       | 0          | 1                                          | 0.4048        | 0(0-Inf)              |
| EXHAUSTION, HEAT, NOS                                             | 0                                       | 0          | 8                                          | 2.062         | 0(0-Inf)              |
| EXHAUSTION, NERVOUS                                               | 2                                       | 15.457     | 15                                         | 3.3812        | 4.5714(1.03-20.2901)  |
| EXHAUSTION, NOS                                                   | 1                                       | 7.2616     | 24                                         | 6.9054        | 1.0516(0.1413-7.8285) |
| EXOPHORIA, INTERMITTENT                                           | 0                                       | 0          | 1                                          | 0.4048        | 0(0-Inf)              |
| EXOPHORIA, NOS                                                    | 1                                       | 6.9334     | 65                                         | 16.4184       | 0.4223(0.0585-3.0509) |
| EXOPHTHALMOS, NOS                                                 | 0                                       | 0          | 19                                         | 4.5911        | 0(0-Inf)              |

| Description                                               | No. of Positive Cases with Disease Code | Case Rate* | No. of Positive Controls with Disease Code | Control Rate* | Relative Risk (95%CI)    |
|-----------------------------------------------------------|-----------------------------------------|------------|--------------------------------------------|---------------|--------------------------|
| EXOSTOSIS, CONGENITAL                                     | 0                                       | 0          | 1                                          | 0.398         | 0(0-Inf)                 |
| EXOSTOSIS, HEAD OR NECK                                   | 2                                       | 15.3466    | 40                                         | 13.1921       | 1.1633(0.2799-4.8351)    |
| EXOSTOSIS, JAWBONE                                        | 2                                       | 13.9109    | 44                                         | 11.3658       | 1.2239(0.2953-5.0733)    |
| EXOSTOSIS, LOWER EXTREMITY                                | 8                                       | 61.0207    | 159                                        | 36.3349       | 1.6794(0.8229-3.4272)    |
| EXOSTOSIS, MANDIBLE                                       | 1                                       | 7.053      | 31                                         | 8.5291        | 0.8269(0.1123-6.0869)    |
| EXOSTOSIS, NOS                                            | 1                                       | 7.1447     | 11                                         | 3.0953        | 2.3083(0.2941-18.1134)   |
| EXOSTOSIS, PALATE                                         | 0                                       | 0          | 5                                          | 1.1155        | 0(0-Inf)                 |
| EXOSTOSIS, TRUNK                                          | 1                                       | 6.9424     | 42                                         | 10.6337       | 0.6529(0.0895-4.7626)    |
| EXOSTOSIS, UPPER EXTREMITY                                | 1                                       | 7.4601     | 62                                         | 14.6408       | 0.5095(0.0705-3.685)     |
| EXOTROPIA, ALTERNATING                                    | 0                                       | 0          | 3                                          | 0.8019        | 0(0-Inf)                 |
| EXOTROPIA, ALTERNATING (V-PATTERN)                        | 0                                       | 0          | 2                                          | 1.1379        | 0(0-Inf)                 |
| EXOTROPIA, INTERMITTENT                                   | 1                                       | 7.0557     | 24                                         | 6.5227        | 1.0817(0.1454-8.0482)    |
| EXOTROPIA, MONOCULAR                                      | 0                                       | 0          | 1                                          | 0.3526        | 0(0-Inf)                 |
| EXOTROPIA, NOS                                            | 4                                       | 27.8549    | 121                                        | 30.9956       | 0.8987(0.331-2.4399)     |
| EXPOSURE, AGENT ORANGE                                    | 0                                       | 0          | 1                                          | 0.2729        | 0(0-Inf)                 |
| EXPOSURE, AIDS                                            | 0                                       | 0          | 2                                          | 0.4681        | 0(0-Inf)                 |
| EXPOSURE, ASBESTOS                                        | 0                                       | 0          | 56                                         | 31.0933       | 0(0-Inf)                 |
| EXPOSURE, CIGARETTE SMOKE                                 | 0                                       | 0          | 9                                          | 2.6277        | 0(0-Inf)                 |
| EXPOSURE, CORNEA                                          | 1                                       | 10.8032    | 12                                         | 6.8241        | 1.5831(0.2041-12.2788)   |
| EXPOSURE, ELEMENTS (SUN, WIND, COLD, HEAT, ETC.)          | 0                                       | 0          | 32                                         | 9.0016        | 0(0-Inf)                 |
| EXPOSURE, ENVIRONMENTAL POLLUTION                         | 0                                       | 0          | 4                                          | 0.975         | 0(0-Inf)                 |
| EXPOSURE, GRAIN OR OTHER ORGANIC DUST (RESPIRATORY #)     | 0                                       | 0          | 2                                          | 1.0782        | 0(0-Inf)                 |
| EXPOSURE, OCCUPATIONAL CHEMICAL                           | 0                                       | 0          | 6                                          | 1.444         | 0(0-Inf)                 |
| EXPOSURE, TOXIC                                           | 0                                       | 0          | 4                                          | 1.1113        | 0(0-Inf)                 |
| EXSANGUINATION, NOS                                       | 1                                       | 9.5292     | 7                                          | 3.2888        | 2.8975(0.3509-23.9244)   |
| EXTRA RENAL PELVIS                                        | 0                                       | 0          | 4                                          | 1.363         | 0(0-Inf)                 |
| EXTRASYSTOLES, NOS                                        | 2                                       | 13.8653    | 89                                         | 22.7218       | 0.6102(0.1499-2.484)     |
| EXTRASYSTOLES, VENTRICULAR                                | 0                                       | 0          | 32                                         | 8.4153        | 0(0-Inf)                 |
| EXTRAVASATION, BLOOD                                      | 1                                       | 11.7332    | 2                                          | 0.6294        | 18.6423(1.6269-213.6141) |
| EXTRAVASATION, PELVICALYCEAL (RENAL)                      | 0                                       | 0          | 1                                          | 0.8877        | 0(0-Inf)                 |
| EXTRAVASATION, URINE, FROM URETER                         | 0                                       | 0          | 1                                          | 0.2729        | 0(0-Inf)                 |
| EXTRAVASATION, URINE, NOS                                 | 0                                       | 0          | 20                                         | 11.4888       | 0(0-Inf)                 |
| EXTRUDED, CERVICAL DISC                                   | 4                                       | 35.047     | 89                                         | 23.6282       | 1.4833(0.5429-4.0522)    |
| EXTRUDED, DISC, NOS SEE ALSO PROTRUDED OR HERNIATED       | 1                                       | 8.032      | 19                                         | 4.8344        | 1.6614(0.2208-12.5004)   |
| EXTRUDED, LUMBAR DISC                                     | 11                                      | 81.7226    | 475                                        | 118.2087      | 0.6913(0.3799-1.2583)    |
| EXTRUDED, MYRINGOTOMY TUBE                                | 0                                       | 0          | 15                                         | 5.0951        | 0(0-Inf)                 |
| EXUDATES RETINAL                                          | 0                                       | 0          | 2                                          | 1.8978        | 0(0-Inf)                 |
| FABRICATION PROSTHETIC DEVICE SEE ALSO FITTING            | 0                                       | 0          | 6                                          | 1.3473        | 0(0-Inf)                 |
| FAILED SURGICAL PROCEDURE (CODE ALSO CONDITION IF STATED) | 1                                       | 9.9964     | 26                                         | 13.0454       | 0.7663(0.1035-5.6722)    |

| Description                                            | No. of Positive Cases with Disease Code | Case Rate* | No. of Positive Controls with Disease Code | Control Rate* | Relative Risk (95%CI)   |
|--------------------------------------------------------|-----------------------------------------|------------|--------------------------------------------|---------------|-------------------------|
| FAILURE, ARTHRECTOMY CORONARY                          | 0                                       | 0          | 2                                          | 0.5709        | 0(0-Inf)                |
| FAILURE, AORTIC VALVE HOMOGRAFT                        | 0                                       | 0          | 1                                          | 0.4048        | 0(0-Inf)                |
| FAILURE, ARTHRODESIS                                   | 0                                       | 0          | 20                                         | 4.8976        | 0(0-Inf)                |
| FAILURE, AUTONOMIC (PROGRESSIVE)                       | 2                                       | 23.0113    | 10                                         | 6.1151        | 3.7631(0.8151-17.373)   |
| FAILURE, AUTONOMIC (PURE)                              | 0                                       | 0          | 9                                          | 4.7326        | 0(0-Inf)                |
| FAILURE, BALLOON DILATATION (CODE ALSO STATUS BY SITE) | 2                                       | 14.3239    | 35                                         | 10.1783       | 1.4073(0.3367-5.8818)   |
| FAILURE, BONE MARROW, NOS                              | 0                                       | 0          | 1                                          | 0.8877        | 0(0-Inf)                |
| FAILURE, CARDIAC, SEE ALSO FAILURE, CONGESTIVE HEART   | 3                                       | 33.5486    | 28                                         | 16.5296       | 2.0296(0.6135-6.7149)   |
| FAILURE, CARDIORESPIRATORY                             | 3                                       | 39.2957    | 12                                         | 8.802         | 4.4644(1.2476-15.9749)  |
| FAILURE, CIRCULATORY                                   | 2                                       | 43.9691    | 0                                          | 0             | 240265446951.003(0-Inf) |
| FAILURE, CONGESTIVE HEART, ACUTE                       | 2                                       | 25.4925    | 47                                         | 33.8399       | 0.7533(0.1825-3.1099)   |
| FAILURE, CONGESTIVE HEART, CHRONIC                     | 6                                       | 102.8663   | 75                                         | 78.8193       | 1.3051(0.5671-3.0032)   |
| FAILURE, CONGESTIVE HEART, COMPENSATED                 | 32                                      | 517.0839   | 471                                        | 455.4171      | 1.1354(0.793-1.6256)    |
| FAILURE, CONGESTIVE HEART--CHF                         | 125                                     | 2083.952   | 2073                                       | 1980.5987     | 1.0522(0.8781-1.2608)   |
| FAILURE, END ORGAN, BLADDER                            | 0                                       | 0          | 4                                          | 7.7103        | 0(0-Inf)                |
| FAILURE, FUSION                                        | 0                                       | 0          | 3                                          | 0.9165        | 0(0-Inf)                |
| FAILURE, GONADAL, PRIMARY MALE                         | 0                                       | 0          | 3                                          | 3.7608        | 0(0-Inf)                |
| FAILURE, GRAFT, ARTERY                                 | 0                                       | 0          | 1                                          | 0.3526        | 0(0-Inf)                |
| FAILURE, GRAFT, BONE                                   | 1                                       | 11.6914    | 0                                          | 0             | 8840895730.6077(0-Inf)  |
| FAILURE, GRAFT, SKIN                                   | 0                                       | 0          | 6                                          | 1.5075        | 0(0-Inf)                |
| FAILURE, GRAFT, TENDON                                 | 0                                       | 0          | 3                                          | 1.2105        | 0(0-Inf)                |
| FAILURE, GRAFT, VEIN                                   | 0                                       | 0          | 6                                          | 3.2367        | 0(0-Inf)                |
| FAILURE, HEART, HIGH OUTPUT                            | 0                                       | 0          | 2                                          | 2.5439        | 0(0-Inf)                |
| FAILURE, HEART, HYPERTENSIVE                           | 0                                       | 0          | 3                                          | 1.5107        | 0(0-Inf)                |
| FAILURE, HEART, LEFT VENTRICULAR                       | 5                                       | 40.9541    | 102                                        | 37.523        | 1.0914(0.4436-2.6856)   |
| FAILURE, HEART, RIGHT                                  | 4                                       | 50.4171    | 117                                        | 81.8891       | 0.6157(0.2269-1.6704)   |
| FAILURE, HEART, SEE ALSO FAILURE, CONGESTIVE HEART     | 13                                      | 208.3433   | 263                                        | 255.2287      | 0.8163(0.4673-1.426)    |
| FAILURE, HEPATIC                                       | 1                                       | 11.6856    | 16                                         | 9.9683        | 1.1723(0.1546-8.8891)   |
| FAILURE, LIVER                                         | 1                                       | 8.0939     | 11                                         | 3.9614        | 2.0432(0.2609-16.0039)  |
| FAILURE, MULTIPLE SYSTEM                               | 0                                       | 0          | 43                                         | 29.8435       | 0(0-Inf)                |
| FAILURE, MYOCARDIAL                                    | 0                                       | 0          | 19                                         | 5.3129        | 0(0-Inf)                |
| FAILURE, MYOCUTANEOUS FLAP                             | 0                                       | 0          | 1                                          | 0.2729        | 0(0-Inf)                |
| FAILURE, OVARIAN                                       | 0                                       | 0          | 5                                          | 1.9918        | 0(0-Inf)                |
| FAILURE, PACEMAKER, ARTIFICIAL                         | 0                                       | 0          | 8                                          | 2.9699        | 0(0-Inf)                |
| FAILURE, PITUITARY, ANTERIOR                           | 0                                       | 0          | 2                                          | 1.7758        | 0(0-Inf)                |
| FAILURE, PITUITARY, NOS                                | 0                                       | 0          | 2                                          | 0.5069        | 0(0-Inf)                |
| FAILURE, POLYGLANDULAR                                 | 0                                       | 0          | 1                                          | 0.234         | 0(0-Inf)                |
| FAILURE, RENAL AUTOTRANSPLANT                          | 1                                       | 11.6728    | 0                                          | 0             | 8830338270.9212(0-Inf)  |
| FAILURE, RENAL, ACUTE                                  | 41                                      | 628.1499   | 540                                        | 483.4715      | 1.2992(0.945-1.7862)    |
| FAILURE, RENAL, CHRONIC                                | 43                                      | 641.521    | 619                                        | 531.6799      | 1.2066(0.8851-1.6449)   |



| Description                                           | No. of Positive Cases with Disease Code | Case Rate* | No. of Positive Controls with Disease Code | Control Rate* | Relative Risk (95%CI)  |
|-------------------------------------------------------|-----------------------------------------|------------|--------------------------------------------|---------------|------------------------|
| FAILURE, RENAL, NOS                                   | 34                                      | 489.7444   | 424                                        | 346.7665      | 1.4123(0.9949-2.0049)  |
| FAILURE, RESPIRATORY                                  | 14                                      | 173.7944   | 422                                        | 286.5268      | 0.6066(0.3559-1.0339)  |
| FAILURE, SEMINIFEROUS TUBAL/TESTICULAR                | 0                                       | 0          | 6                                          | 1.6432        | 0(0-Inf)               |
| FAILURE, STREPTOKINASE                                | 0                                       | 0          | 2                                          | 0.5475        | 0(0-Inf)               |
| FAILURE, SYMPATHETIC SUDOMOTOR, POST GANGLIONIC       | 0                                       | 0          | 1                                          | 0.234         | 0(0-Inf)               |
| FAILURE, TESTICULAR, PRIMARY                          | 1                                       | 25.7081    | 14                                         | 19.8879       | 1.2927(0.1692-9.8775)  |
| FAILURE, TO THRIVE                                    | 19                                      | 357.4528   | 261                                        | 327.8276      | 1.0904(0.6838-1.7386)  |
| FAILURE, VENTILATORY, CAUSE SPECIFIED                 | 0                                       | 0          | 2                                          | 0.5908        | 0(0-Inf)               |
| FAILURE, VENTILATORY, NOS                             | 0                                       | 0          | 2                                          | 0.5709        | 0(0-Inf)               |
| FAINTING                                              | 3                                       | 23.0076    | 58                                         | 18.7966       | 1.224(0.3818-3.9237)   |
| FALLEN ARCHES                                         | 0                                       | 0          | 10                                         | 3.2844        | 0(0-Inf)               |
| FALLING EPISODES / SPELLS (FREQUENT) (NON-ACCIDENTAL) | 46                                      | 763.9331   | 629                                        | 651.1416      | 1.1732(0.8691-1.5838)  |
| FALSE, LABOR                                          | 0                                       | 0          | 5                                          | 3.5657        | 0(0-Inf)               |
| FALSE, PASSAGE, URETHRA                               | 0                                       | 0          | 23                                         | 34.3235       | 0(0-Inf)               |
| FALSE, VOCAL CORD PHONATION                           | 0                                       | 0          | 3                                          | 1.2106        | 0(0-Inf)               |
| FAMILY PLANNING, FOR CONTRACEPTION--BC                | 0                                       | 0          | 75                                         | 40.089        | 0(0-Inf)               |
| FAMILY PLANNING, NEC                                  | 0                                       | 0          | 2                                          | 0.5474        | 0(0-Inf)               |
| FARMER'S LUNG                                         | 0                                       | 0          | 5                                          | 1.3648        | 0(0-Inf)               |
| FASCICULATION                                         | 0                                       | 0          | 48                                         | 15.2653       | 0(0-Inf)               |
| FASCIITIS, EOSINOPHILIC                               | 0                                       | 0          | 2                                          | 0.432         | 0(0-Inf)               |
| FASCIITIS, NOS                                        | 3                                       | 22.1907    | 77                                         | 18.1937       | 1.2197(0.3834-3.8798)  |
| FASCIITIS, PLANTAR                                    | 61                                      | 447.6053   | 1926                                       | 506.0722      | 0.8845(0.685-1.142)    |
| FAT, DEPOSIT HEART                                    | 0                                       | 0          | 7                                          | 1.656         | 0(0-Inf)               |
| FAT, HERNIA, RETRO-ORBITAL                            | 0                                       | 0          | 39                                         | 10.1175       | 0(0-Inf)               |
| FAT, PAD                                              | 9                                       | 62.8599    | 84                                         | 20.2065       | 3.1109(1.5554-6.2218)  |
| FAT, PAD, HYPERTROPHIC, INFRAPATELLA                  | 0                                       | 0          | 4                                          | 1.5301        | 0(0-Inf)               |
| FAT, PAD, HYPERTROPHIC, KNEE                          | 1                                       | 8.5151     | 5                                          | 1.2047        | 7.0683(0.8038-62.1583) |
| FAT, REPLACED LYMPH NODE                              | 0                                       | 0          | 2                                          | 0.4681        | 0(0-Inf)               |
| FATIGUE, CHRONIC                                      | 4                                       | 35.7521    | 143                                        | 60.6608       | 0.5894(0.2178-1.5949)  |
| FATIGUE, FUNCTIONAL                                   | 12                                      | 114.5726   | 250                                        | 63.0541       | 1.8171(1.0159-3.2501)  |
| FATIGUE, MUSCLE                                       | 0                                       | 0          | 25                                         | 7.0236        | 0(0-Inf)               |
| FATIGUE, NERVOUS                                      | 1                                       | 12.2717    | 42                                         | 12.1586       | 1.0093(0.1384-7.3604)  |
| FATIGUE, NOS                                          | 139                                     | 1234.454   | 3383                                       | 1319.6066     | 0.9355(0.7891-1.109)   |
| FATIGUE, POST-VIRAL                                   | 0                                       | 0          | 10                                         | 3.3114        | 0(0-Inf)               |
| FATIGUE, STATE                                        | 2                                       | 17.9695    | 101                                        | 43.0181       | 0.4177(0.1029-1.6964)  |
| FATIGUE, VOICE                                        | 0                                       | 0          | 2                                          | 0.4681        | 0(0-Inf)               |
| FATTY, EXCESSIVE TISSUE, ABDOMEN                      | 0                                       | 0          | 2                                          | 1.1971        | 0(0-Inf)               |
| FATTY, LIVER                                          | 2                                       | 13.9569    | 138                                        | 36.3293       | 0.3842(0.095-1.5542)   |
| FATTY, LIVER, ALCOHOLIC                               | 1                                       | 7.5302     | 5                                          | 1.6097        | 4.6781(0.5353-40.8814) |
| FATTY, TISSUE MASS, BREAST                            | 1                                       | 7.7475     | 124                                        | 27.2672       | 0.2841(0.0396-2.0363)  |

| Description                                                     | No. of Positive Cases with Disease Code | Case Rate* | No. of Positive Controls with Disease Code | Control Rate* | Relative Risk (95%CI)    |
|-----------------------------------------------------------------|-----------------------------------------|------------|--------------------------------------------|---------------|--------------------------|
| FATTY, TISSUE MASS, LYMPH NODE                                  | 0                                       | 0          | 2                                          | 0.7897        | 0(0-Inf)                 |
| FECALITH, APPENDIX                                              | 0                                       | 0          | 8                                          | 2.5907        | 0(0-Inf)                 |
| FECALITH, INTESTINE                                             | 1                                       | 8.9886     | 11                                         | 2.7829        | 3.2299(0.4113-25.3617)   |
| FELON, FINGER                                                   | 1                                       | 7.74       | 25                                         | 5.8136        | 1.3314(0.1791-9.8944)    |
| FEVER, DANDY                                                    | 0                                       | 0          | 1                                          | 0.234         | 0(0-Inf)                 |
| FEVER, GRAIN                                                    | 0                                       | 0          | 1                                          | 0.2729        | 0(0-Inf)                 |
| FEVER, HEMORRHAGIC, DENGUE VIRUS                                | 0                                       | 0          | 1                                          | 0.2729        | 0(0-Inf)                 |
| FEVER, NOS, SEE ALSO PYREXIA                                    | 52                                      | 594.1002   | 1076                                       | 647.722       | 0.9172(0.6939-1.2124)    |
| FEVER, Q                                                        | 0                                       | 0          | 1                                          | 0.2729        | 0(0-Inf)                 |
| FEVER, RELAPSING, NOS                                           | 0                                       | 0          | 1                                          | 0.4048        | 0(0-Inf)                 |
| FEVER, RHEUMATIC, ACUTE                                         | 0                                       | 0          | 1                                          | 0.3526        | 0(0-Inf)                 |
| FEVER, RHEUMATIC, HISTORY OF                                    | 1                                       | 7.087      | 57                                         | 13.696        | 0.5174(0.0714-3.7478)    |
| FEVER, RHEUMATIC, NOS                                           | 0                                       | 0          | 9                                          | 3.9061        | 0(0-Inf)                 |
| FEVER, RHEUMATIC, OLD                                           | 0                                       | 0          | 4                                          | 1.6684        | 0(0-Inf)                 |
| FEVER, SCARLET                                                  | 0                                       | 0          | 1                                          | 1.0365        | 0(0-Inf)                 |
| FEVER, UNDULANT                                                 | 0                                       | 0          | 1                                          | 1.9077        | 0(0-Inf)                 |
| FEVER, UNKNOWN ORIGIN--FUO                                      | 3                                       | 26.3583    | 129                                        | 53.0382       | 0.497(0.1579-1.5639)     |
| FEVER, VALLEY (SAN JOAQUIN)                                     | 0                                       | 0          | 2                                          | 1.1614        | 0(0-Inf)                 |
| FIBRILLATION, ATRIAL, ACUTE                                     | 0                                       | 0          | 8                                          | 2.2842        | 0(0-Inf)                 |
| FIBRILLATION, ATRIAL, CHRONIC                                   | 40                                      | 556.9556   | 728                                        | 574.0363      | 0.9702(0.7052-1.3349)    |
| FIBRILLATION, ATRIAL, NOS - AF                                  | 102                                     | 1374.663   | 2080                                       | 1529.4999     | 0.8988(0.7364-1.097)     |
| FIBRILLATION, ATRIAL, PAROXYSMAL--PAF                           | 56                                      | 588.854    | 1086                                       | 565.5917      | 1.0411(0.7953-1.3629)    |
| FIBRILLATION, AURICULAR, SEE ALSO FIBRILLATION, ATRIAL          | 1                                       | 6.9599     | 1                                          | 0.2539        | 27.4135(1.5969-470.5886) |
| FIBRILLATION, MUSCULAR                                          | 0                                       | 0          | 2                                          | 0.5709        | 0(0-Inf)                 |
| FIBRILLATION, NOS (HEART#)                                      | 1                                       | 7.3874     | 3                                          | 0.9146        | 8.077(0.8126-80.2851)    |
| FIBRILLATION, VENTRICULAR                                       | 0                                       | 0          | 65                                         | 27.7398       | 0(0-Inf)                 |
| FIBRILLATION, WITH FLUTTER                                      | 3                                       | 28.5633    | 60                                         | 27.8737       | 1.0247(0.3204-3.2778)    |
| FIBRINOLYSIS (HEMORRHAGIC)                                      | 0                                       | 0          | 1                                          | 0.3526        | 0(0-Inf)                 |
| FIBROADENOMA, BREAST                                            | 3                                       | 48.1515    | 235                                        | 103.7952      | 0.4639(0.1483-1.4508)    |
| FIBROADENOMA, NOS, CODE ALSO NEOPLASM, BENIGN BY SITE           | 0                                       | 0          | 11                                         | 4.1772        | 0(0-Inf)                 |
| FIBROBLAST CULTURE ONLY                                         | 0                                       | 0          | 1                                          | 0.234         | 0(0-Inf)                 |
| FIBROBLASTOMA, MALIGNANT, CODE ALSO NEOPLASM, MALIGNANT BY SITE | 0                                       | 0          | 1                                          | 0.4751        | 0(0-Inf)                 |
| FIBROELASTOMA HEART                                             | 1                                       | 8.377      | 5                                          | 1.8959        | 4.4186(0.5047-38.6847)   |
| FIBROEPITHELIOMA, NOS, CODE ALSO NEOPLASM, BENIGN BY SITE       | 1                                       | 9.0249     | 7                                          | 1.6428        | 5.4936(0.6615-45.6231)   |
| FIBROEPITHELIOMA, PINKUS                                        | 0                                       | 0          | 9                                          | 2.6285        | 0(0-Inf)                 |
| FIBRO-FOLLICULOMA, NOS                                          | 0                                       | 0          | 3                                          | 0.7175        | 0(0-Inf)                 |
| FIBROID, NOS, CODE ALSO NEOPLASM, BENIGN BY SITE                | 0                                       | 0          | 23                                         | 10.0652       | 0(0-Inf)                 |
| FIBROID, UTERUS                                                 | 13                                      | 328.095    | 569                                        | 316.1504      | 1.0378(0.5983-1.8)       |

| Description                                               | No. of Positive Cases with Disease Code | Case Rate* | No. of Positive Controls with Disease Code | Control Rate* | Relative Risk (95%CI)   |
|-----------------------------------------------------------|-----------------------------------------|------------|--------------------------------------------|---------------|-------------------------|
| FIBROLIPOMA CODE ALSO LIPOMA BY SITE                      | 1                                       | 7.0121     | 27                                         | 6.7647        | 1.0366(0.1401-7.6669)   |
| FIBROMA, MALIGNANT, CODE ALSO NEOPLASM, MALIGNANT BY SITE | 0                                       | 0          | 1                                          | 0.4048        | 0(0-Inf)                |
| FIBROMA, NOS, CODE ALSO NEOPLASM, BENIGN BY SITE          | 11                                      | 78.1661    | 298                                        | 71.3464       | 1.0956(0.5991-2.0037)   |
| FIBROMA, OVARY                                            | 1                                       | 16.7393    | 38                                         | 16.8043       | 0.9961(0.1361-7.2911)   |
| FIBROMA, UTERINE                                          | 2                                       | 23.2449    | 6                                          | 1.5434        | 15.0607(2.97-76.3731)   |
| FIBROMATOSIS, DUPUYTREN'S                                 | 0                                       | 0          | 7                                          | 3.5296        | 0(0-Inf)                |
| FIBROMATOSIS, FOOT                                        | 0                                       | 0          | 1                                          | 0.2354        | 0(0-Inf)                |
| FIBROMATOSIS, NOS                                         | 1                                       | 6.9774     | 44                                         | 12.1013       | 0.5766(0.0792-4.1971)   |
| FIBROMATOSIS, PLANTAR                                     | 0                                       | 0          | 10                                         | 3.7139        | 0(0-Inf)                |
| FIBROMYALGIA, NOS, SEE ALSO MYALGIA                       | 9                                       | 62.8382    | 381                                        | 94.678        | 0.6637(0.3422-1.2873)   |
| FIBROMYOMA, NOS, CODE ALSO NEOPLASM, BENIGN BY SITE       | 0                                       | 0          | 2                                          | 0.5069        | 0(0-Inf)                |
| FIBROMYOMA, UTERUS                                        | 1                                       | 36.9953    | 46                                         | 31.6617       | 1.1685(0.1608-8.4917)   |
| FIBROMYOSITIS                                             | 0                                       | 0          | 12                                         | 3.2145        | 0(0-Inf)                |
| FIBROMYXOMA, NOS, CODE ALSO NEO BENIGN BY SITE            | 0                                       | 0          | 1                                          | 0.4048        | 0(0-Inf)                |
| FIBROSARCOMA CODE ALSO NEOPLASM MALIGNANT BY SITE         | 0                                       | 0          | 3                                          | 0.9773        | 0(0-Inf)                |
| FIBROSCLEROSIS, BREAST                                    | 3                                       | 62.3489    | 106                                        | 51.5051       | 1.2105(0.3832-3.8246)   |
| FIBROSIS, ANUS                                            | 0                                       | 0          | 6                                          | 1.8335        | 0(0-Inf)                |
| FIBROSIS, BREAST                                          | 7                                       | 50.2803    | 275                                        | 61.2166       | 0.8214(0.3872-1.7423)   |
| FIBROSIS, CYSTIC                                          | 0                                       | 0          | 1                                          | 0.4048        | 0(0-Inf)                |
| FIBROSIS, ENDOMYOCARDIAL                                  | 0                                       | 0          | 3                                          | 0.9167        | 0(0-Inf)                |
| FIBROSIS, EPIDURAL, SPINAL                                | 0                                       | 0          | 3                                          | 1.5108        | 0(0-Inf)                |
| FIBROSIS, ESOPHAGUS                                       | 0                                       | 0          | 6                                          | 1.5043        | 0(0-Inf)                |
| FIBROSIS, EYE                                             | 19                                      | 228.1323   | 374                                        | 242.0177      | 0.9426(0.5938-1.4962)   |
| FIBROSIS, HEART                                           | 0                                       | 0          | 13                                         | 4.9289        | 0(0-Inf)                |
| FIBROSIS, INTESTINE, LARGE                                | 0                                       | 0          | 5                                          | 2.2761        | 0(0-Inf)                |
| FIBROSIS, INTESTINE, SMALL                                | 0                                       | 0          | 3                                          | 0.7175        | 0(0-Inf)                |
| FIBROSIS, JOINT, SEE ALSO ADHESION, JOINT                 | 0                                       | 0          | 6                                          | 1.7649        | 0(0-Inf)                |
| FIBROSIS, KIDNEY                                          | 1                                       | 7.6962     | 1                                          | 0.3293        | 23.369(1.3842-394.5427) |
| FIBROSIS, LIGAMENT/LIGAMENTOUS TISSUE                     | 5                                       | 70.933     | 106                                        | 37.121        | 1.9109(0.7771-4.6987)   |
| FIBROSIS, LIVER, NOS, SEE ALSO CIRRHOSIS LIVER            | 0                                       | 0          | 22                                         | 5.5366        | 0(0-Inf)                |
| FIBROSIS, LUNG                                            | 21                                      | 202.1591   | 291                                        | 133.6086      | 1.5131(0.97-2.3602)     |
| FIBROSIS, LUNG, CHRONIC, NOS                              | 0                                       | 0          | 20                                         | 15.1005       | 0(0-Inf)                |
| FIBROSIS, LUNG, INTERSTITIAL, CHRONIC (DIFFUSE)--CIPF     | 3                                       | 28.2694    | 57                                         | 26.0989       | 1.0832(0.338-3.4707)    |
| FIBROSIS, LUNG, LATE EFFECT OF TUBERCULOSIS               | 0                                       | 0          | 1                                          | 0.8878        | 0(0-Inf)                |
| FIBROSIS, MACULAR                                         | 0                                       | 0          | 2                                          | 2.5469        | 0(0-Inf)                |
| FIBROSIS, MESENTERY                                       | 0                                       | 0          | 1                                          | 0.2729        | 0(0-Inf)                |
| FIBROSIS, NEC / NOS                                       | 0                                       | 0          | 18                                         | 7.1723        | 0(0-Inf)                |
| FIBROSIS, NERVE, SEE ALSO COMPRESSION                     | 0                                       | 0          | 1                                          | 0.234         | 0(0-Inf)                |
| FIBROSIS, NODULAR, SUBEPIDERMAL                           | 0                                       | 0          | 12                                         | 3.0459        | 0(0-Inf)                |

| Description                                                     | No. of Positive Cases with Disease Code | Case Rate* | No. of Positive Controls with Disease Code | Control Rate* | Relative Risk (95%CI)    |
|-----------------------------------------------------------------|-----------------------------------------|------------|--------------------------------------------|---------------|--------------------------|
| FIBROSIS, NODULAR, SUBMUCOSAL                                   | 1                                       | 11.909     | 0                                          | 0             | 8852342574.7484(0-Inf)   |
| FIBROSIS, OVARY                                                 | 0                                       | 0          | 3                                          | 0.9638        | 0(0-Inf)                 |
| FIBROSIS, PANCREAS, NOS                                         | 0                                       | 0          | 3                                          | 0.741         | 0(0-Inf)                 |
| FIBROSIS, PENIS (PLAQUE)                                        | 0                                       | 0          | 6                                          | 1.5947        | 0(0-Inf)                 |
| FIBROSIS, PLEURA, CHRONIC                                       | 0                                       | 0          | 2                                          | 0.7897        | 0(0-Inf)                 |
| FIBROSIS, PLEURA, NOS                                           | 0                                       | 0          | 17                                         | 8.4296        | 0(0-Inf)                 |
| FIBROSIS, PRERETINAL                                            | 0                                       | 0          | 2                                          | 0.5709        | 0(0-Inf)                 |
| FIBROSIS, PROSTATE                                              | 0                                       | 0          | 6                                          | 3.2425        | 0(0-Inf)                 |
| FIBROSIS, RADIATION, CODE ALSO FIBROSIS BY SITE IF STATED       | 0                                       | 0          | 9                                          | 3.3798        | 0(0-Inf)                 |
| FIBROSIS, RETROPERITONEAL                                       | 0                                       | 0          | 9                                          | 3.3015        | 0(0-Inf)                 |
| FIBROSIS, SKIN, NOS                                             | 8                                       | 56.1441    | 187                                        | 48.1475       | 1.1661(0.5733-2.3718)    |
| FIBROSIS, SUBEPIDERMAL                                          | 1                                       | 13.982     | 12                                         | 3.8203        | 3.6599(0.4706-28.4626)   |
| FIBROSIS, SUBEPITHELIAL                                         | 1                                       | 7.5405     | 7                                          | 2.2218        | 3.3938(0.4103-28.0697)   |
| FIBROSIS, SUBMUCOSAL                                            | 0                                       | 0          | 6                                          | 1.6566        | 0(0-Inf)                 |
| FIBROSIS, SUBMUCOSAL, ORAL                                      | 0                                       | 0          | 25                                         | 5.9072        | 0(0-Inf)                 |
| FIBROSIS, TESTIS                                                | 1                                       | 10.6725    | 4                                          | 2.2162        | 4.8158(0.5301-43.7501)   |
| FIBROSIS, UTERUS, NOS                                           | 0                                       | 0          | 3                                          | 0.8034        | 0(0-Inf)                 |
| FIBROSITIS, HUMEROSCAPULAR REGION                               | 0                                       | 0          | 2                                          | 0.6309        | 0(0-Inf)                 |
| FIBROSITIS, NOS                                                 | 9                                       | 70.0431    | 200                                        | 46.4145       | 1.5091(0.7719-2.9504)    |
| FIBROTHORAX                                                     | 0                                       | 0          | 1                                          | 0.8877        | 0(0-Inf)                 |
| FIBROXANTHOMA, MALIGNANT, CODE ALSO NEOPLASM, MALIGNANT BY SITE | 0                                       | 0          | 1                                          | 2.4863        | 0(0-Inf)                 |
| FIBROXANTHOMA, NOS, CODE ALSO NEOPLASM, BENIGN BY SITE          | 2                                       | 17.52      | 13                                         | 5.406         | 3.2408(0.7241-14.5043)   |
| FILLING, DEFECT, BLADDER                                        | 2                                       | 41.7326    | 2                                          | 2.7564        | 15.1401(2.1023-109.0331) |
| FILLING, DEFECT, KIDNEY                                         | 0                                       | 0          | 16                                         | 5.7628        | 0(0-Inf)                 |
| FILLING, DEFECT, NEC/NOS, SEE ALSO ABNORMAL X-RAY               | 1                                       | 14.3508    | 3                                          | 2.6017        | 5.516(0.5632-54.0269)    |
| FILLING, DEFECT, URETER                                         | 0                                       | 0          | 20                                         | 7.8358        | 0(0-Inf)                 |
| FILM TEAR                                                       | 1                                       | 7.0868     | 4                                          | 1.1283        | 6.281(0.6835-57.7171)    |
| FISSURE, ANAL                                                   | 12                                      | 86.1523    | 446                                        | 109.3611      | 0.7878(0.4435-1.3994)    |
| FISSURE, ANORECTAL                                              | 0                                       | 0          | 1                                          | 0.234         | 0(0-Inf)                 |
| FISSURE, INTROITUS                                              | 1                                       | 7.4201     | 7                                          | 2.1333        | 3.4782(0.4189-28.8822)   |
| FISSURE, LIP                                                    | 0                                       | 0          | 7                                          | 1.9847        | 0(0-Inf)                 |
| FISSURE, NASAL                                                  | 1                                       | 7.09       | 19                                         | 4.2664        | 1.6618(0.2203-12.5363)   |
| FISSURE, POSTANAL                                               | 0                                       | 0          | 2                                          | 1.3983        | 0(0-Inf)                 |
| FISSURE, RECTUM                                                 | 0                                       | 0          | 71                                         | 17.2956       | 0(0-Inf)                 |
| FISSURE, SKIN                                                   | 4                                       | 29.3276    | 111                                        | 33.2624       | 0.8817(0.3243-2.397)     |
| FISSURE, TONGUE, ACQUIRED                                       | 0                                       | 0          | 1                                          | 0.2354        | 0(0-Inf)                 |
| FISSURE, TONGUE, NOS                                            | 1                                       | 6.9468     | 3                                          | 0.676         | 10.2763(1.0227-103.2602) |
| FISTULA, ABDOMINAL                                              | 1                                       | 11.3838    | 6                                          | 3.6078        | 3.1554(0.3746-26.5758)   |
| FISTULA, ABDOMINAL (WALL), INTESTINE                            | 0                                       | 0          | 1                                          | 0.4048        | 0(0-Inf)                 |

| Description                                        | No. of Positive Cases with Disease Code | Case Rate* | No. of Positive Controls with Disease Code | Control Rate* | Relative Risk (95%CI)    |
|----------------------------------------------------|-----------------------------------------|------------|--------------------------------------------|---------------|--------------------------|
| FISTULA, ABDOMINAL WALL                            | 0                                       | 0          | 8                                          | 2.0781        | 0(0-Inf)                 |
| FISTULA, ALVEOLAR PROCESS                          | 1                                       | 7.5934     | 3                                          | 0.6839        | 11.1032(1.1091-111.1504) |
| FISTULA, ANAL                                      | 3                                       | 25.0734    | 74                                         | 19.3678       | 1.2946(0.4068-4.1195)    |
| FISTULA, ANORECTAL                                 | 0                                       | 0          | 3                                          | 1.0182        | 0(0-Inf)                 |
| FISTULA, AORTA                                     | 0                                       | 0          | 1                                          | 0.2729        | 0(0-Inf)                 |
| FISTULA, AORTIC CAVAL                              | 0                                       | 0          | 1                                          | 0.234         | 0(0-Inf)                 |
| FISTULA, AORTOENTERIC                              | 0                                       | 0          | 1                                          | 0.8877        | 0(0-Inf)                 |
| FISTULA, ARTERIOVENOUS, ABDOMEN, ACQUIRED          | 0                                       | 0          | 7                                          | 3.1229        | 0(0-Inf)                 |
| FISTULA, ARTERIOVENOUS, ABDOMEN, CONGENITAL        | 4                                       | 44.9755    | 118                                        | 70.2589       | 0.6401(0.2359-1.737)     |
| FISTULA, ARTERIOVENOUS, CEREBRAL, ACQUIRED         | 0                                       | 0          | 1                                          | 0.398         | 0(0-Inf)                 |
| FISTULA, ARTERIOVENOUS, CEREBRAL, CONGENITAL       | 0                                       | 0          | 8                                          | 2.933         | 0(0-Inf)                 |
| FISTULA, ARTERIOVENOUS, CORONARY, CONGENITAL       | 0                                       | 0          | 2                                          | 0.5709        | 0(0-Inf)                 |
| FISTULA, ARTERIOVENOUS, DURA, CONGENITAL           | 0                                       | 0          | 7                                          | 2.2843        | 0(0-Inf)                 |
| FISTULA, ARTERIOVENOUS, EXTREMITY, CONGENITAL      | 0                                       | 0          | 6                                          | 2.2961        | 0(0-Inf)                 |
| FISTULA, ARTERIOVENOUS, EXTREMITY, LOWER, ACQUIRED | 0                                       | 0          | 6                                          | 2.37          | 0(0-Inf)                 |
| FISTULA, ARTERIOVENOUS, EXTREMITY, UPPER, ACQUIRED | 1                                       | 6.8556     | 2                                          | 0.552         | 12.419(1.0933-141.0716)  |
| FISTULA, ARTERIOVENOUS, HEAD, CONGENITAL           | 1                                       | 7.7606     | 8                                          | 2.7201        | 2.853(0.3519-23.1291)    |
| FISTULA, ARTERIOVENOUS, LUNG, CONGENITAL           | 0                                       | 0          | 1                                          | 0.2354        | 0(0-Inf)                 |
| FISTULA, ARTERIOVENOUS, NOS, ACQUIRED              | 1                                       | 7.4654     | 4                                          | 1.261         | 5.92(0.6449-54.3427)     |
| FISTULA, ARTERIOVENOUS, NOS, CONGENITAL            | 0                                       | 0          | 8                                          | 3.1589        | 0(0-Inf)                 |
| FISTULA, ARTERIOVENOUS, PELVIS, ACQUIRED           | 0                                       | 0          | 1                                          | 0.4048        | 0(0-Inf)                 |
| FISTULA, ARTERIOVENOUS, PULMONARY, CONGENITAL      | 0                                       | 0          | 1                                          | 0.398         | 0(0-Inf)                 |
| FISTULA, ARTERIOVENOUS, RENAL, CONGENITAL          | 0                                       | 0          | 1                                          | 0.2354        | 0(0-Inf)                 |
| FISTULA, ARTERIOVENOUS, SPINE, ACQUIRED            | 0                                       | 0          | 1                                          | 1.0368        | 0(0-Inf)                 |
| FISTULA, ARTERIOVENOUS, SPINE, CONGENITAL          | 0                                       | 0          | 2                                          | 0.631         | 0(0-Inf)                 |
| FISTULA, BONE                                      | 1                                       | 7.1909     | 0                                          | 0             | 12738406207.6419(0-Inf)  |
| FISTULA, BRANCHIAL, CLEFT                          | 0                                       | 0          | 1                                          | 0.2729        | 0(0-Inf)                 |
| FISTULA, BREAST                                    | 0                                       | 0          | 2                                          | 0.4708        | 0(0-Inf)                 |
| FISTULA, BRONCHOPLEURAL, CUTANEOUS                 | 0                                       | 0          | 1                                          | 0.2729        | 0(0-Inf)                 |
| FISTULA, BRONCHOPLEURAL, NOS                       | 0                                       | 0          | 3                                          | 0.7884        | 0(0-Inf)                 |
| FISTULA, BUCCAL CAVITY                             | 1                                       | 6.9488     | 9                                          | 2.0912        | 3.3228(0.413-26.7332)    |
| FISTULA, CECUM                                     | 0                                       | 0          | 2                                          | 0.5709        | 0(0-Inf)                 |
| FISTULA, CEREBROSPINAL                             | 0                                       | 0          | 1                                          | 0.2729        | 0(0-Inf)                 |
| FISTULA, CHEST                                     | 0                                       | 0          | 1                                          | 0.8877        | 0(0-Inf)                 |
| FISTULA, CHOLECYSTOCOLONIC                         | 0                                       | 0          | 1                                          | 0.4048        | 0(0-Inf)                 |
| FISTULA, COLOCUTANEOUS                             | 0                                       | 0          | 1                                          | 0.4048        | 0(0-Inf)                 |
| FISTULA, COLON                                     | 0                                       | 0          | 6                                          | 2.4444        | 0(0-Inf)                 |
| FISTULA, COLOVAGINAL                               | 1                                       | 7.1113     | 3                                          | 0.819         | 8.6829(0.8661-87.0511)   |
| FISTULA, CUTANEOUS                                 | 0                                       | 0          | 7                                          | 3.123         | 0(0-Inf)                 |
| FISTULA, DENTAL                                    | 2                                       | 15.654     | 54                                         | 18.2753       | 0.8566(0.2081-3.5262)    |

| Description                                               | No. of Positive Cases with Disease Code | Case Rate* | No. of Positive Controls with Disease Code | Control Rate* | Relative Risk (95%CI)    |
|-----------------------------------------------------------|-----------------------------------------|------------|--------------------------------------------|---------------|--------------------------|
| FISTULA, DUODENAL                                         | 0                                       | 0          | 2                                          | 1.1972        | 0(0-Inf)                 |
| FISTULA, EAR                                              | 0                                       | 0          | 3                                          | 0.7885        | 0(0-Inf)                 |
| FISTULA, ENTEROCOLIC                                      | 0                                       | 0          | 2                                          | 0.4854        | 0(0-Inf)                 |
| FISTULA, ENTEROCUTANEOUS                                  | 0                                       | 0          | 7                                          | 2.2844        | 0(0-Inf)                 |
| FISTULA, ENTEROVAGINAL                                    | 0                                       | 0          | 1                                          | 0.234         | 0(0-Inf)                 |
| FISTULA, ENTEROVESICAL                                    | 0                                       | 0          | 4                                          | 1.9681        | 0(0-Inf)                 |
| FISTULA, ESOPHAGUS                                        | 0                                       | 0          | 1                                          | 0.2354        | 0(0-Inf)                 |
| FISTULA, FALLOPIAN TUBE                                   | 0                                       | 0          | 1                                          | 0.2354        | 0(0-Inf)                 |
| FISTULA, GALLBLADDER                                      | 0                                       | 0          | 1                                          | 0.8528        | 0(0-Inf)                 |
| FISTULA, GASTROCUTANEOUS                                  | 0                                       | 0          | 3                                          | 1.5395        | 0(0-Inf)                 |
| FISTULA, ILEO-CECAL                                       | 0                                       | 0          | 1                                          | 0.398         | 0(0-Inf)                 |
| FISTULA, ILEO-COLONIC                                     | 0                                       | 0          | 1                                          | 0.2354        | 0(0-Inf)                 |
| FISTULA, ILEOCUTANEOUS                                    | 0                                       | 0          | 2                                          | 0.8724        | 0(0-Inf)                 |
| FISTULA, ILEUM                                            | 0                                       | 0          | 1                                          | 0.8877        | 0(0-Inf)                 |
| FISTULA, INTESTINE                                        | 0                                       | 0          | 8                                          | 2.3396        | 0(0-Inf)                 |
| FISTULA, INTESTINOCOLONIC                                 | 0                                       | 0          | 1                                          | 0.3526        | 0(0-Inf)                 |
| FISTULA, JEJUNUM                                          | 0                                       | 0          | 1                                          | 0.2354        | 0(0-Inf)                 |
| FISTULA, JOINT, ELBOW                                     | 0                                       | 0          | 1                                          | 0.4048        | 0(0-Inf)                 |
| FISTULA, JOINT, HIP                                       | 0                                       | 0          | 1                                          | 0.398         | 0(0-Inf)                 |
| FISTULA, JOINT, KNEE                                      | 0                                       | 0          | 1                                          | 1.9059        | 0(0-Inf)                 |
| FISTULA, JOINT, NEC, WITH ORTHO DEVICE EXCEPT TOTAL JOINT | 0                                       | 0          | 1                                          | 0.2729        | 0(0-Inf)                 |
| FISTULA, JOINT, TOE                                       | 0                                       | 0          | 5                                          | 3.906         | 0(0-Inf)                 |
| FISTULA, LUNG, NOS                                        | 0                                       | 0          | 1                                          | 0.8879        | 0(0-Inf)                 |
| FISTULA, MAXILLARY SINUS                                  | 0                                       | 0          | 1                                          | 0.2354        | 0(0-Inf)                 |
| FISTULA, MOUTH                                            | 0                                       | 0          | 15                                         | 4.0734        | 0(0-Inf)                 |
| FISTULA, NOS                                              | 0                                       | 0          | 11                                         | 4.4262        | 0(0-Inf)                 |
| FISTULA, ORBIT                                            | 0                                       | 0          | 1                                          | 0.234         | 0(0-Inf)                 |
| FISTULA, ORO-ANTRAL                                       | 0                                       | 0          | 9                                          | 2.3398        | 0(0-Inf)                 |
| FISTULA, ORONASAL                                         | 0                                       | 0          | 5                                          | 1.3507        | 0(0-Inf)                 |
| FISTULA, PANCREATIC                                       | 0                                       | 0          | 3                                          | 3.7616        | 0(0-Inf)                 |
| FISTULA, PAROTID REGION                                   | 0                                       | 0          | 1                                          | 1.0368        | 0(0-Inf)                 |
| FISTULA, PERIANAL                                         | 3                                       | 22.9959    | 28                                         | 6.994         | 3.2879(0.9916-10.9026)   |
| FISTULA, PERICARDIAL                                      | 1                                       | 6.882      | 0                                          | 0             | 12229048488.3381(0-Inf)  |
| FISTULA, PERILYMPH                                        | 0                                       | 0          | 1                                          | 0.4048        | 0(0-Inf)                 |
| FISTULA, PERINEUM, NOS                                    | 0                                       | 0          | 8                                          | 1.9042        | 0(0-Inf)                 |
| FISTULA, PERIRECTAL                                       | 0                                       | 0          | 2                                          | 0.7052        | 0(0-Inf)                 |
| FISTULA, PILONIDAL                                        | 0                                       | 0          | 1                                          | 0.3526        | 0(0-Inf)                 |
| FISTULA, PLEURAL                                          | 1                                       | 9.1788     | 1                                          | 0.4523        | 20.2937(1.2268-335.6875) |

| Description                                                     | No. of Positive Cases with Disease Code | Case Rate* | No. of Positive Controls with Disease Code | Control Rate* | Relative Risk (95%CI)    |
|-----------------------------------------------------------------|-----------------------------------------|------------|--------------------------------------------|---------------|--------------------------|
| FISTULA, POSTOPERATIVE, PERSISTENT, CODE ALSO BY SITE IF STATED | 4                                       | 29.5459    | 72                                         | 21.9725       | 1.3447(0.4894-3.6947)    |
| FISTULA, RECTAL                                                 | 1                                       | 8.0439     | 9                                          | 2.4825        | 3.2403(0.4062-25.8455)   |
| FISTULA, RECT OUTERINE                                          | 0                                       | 0          | 1                                          | 0.2354        | 0(0-Inf)                 |
| FISTULA, RECTOVAGINAL                                           | 0                                       | 0          | 7                                          | 1.5157        | 0(0-Inf)                 |
| FISTULA, SCROTUM                                                | 0                                       | 0          | 1                                          | 1.0359        | 0(0-Inf)                 |
| FISTULA, SIGMOID                                                | 0                                       | 0          | 4                                          | 1.9298        | 0(0-Inf)                 |
| FISTULA, SIGMOIDOVAGINAL                                        | 1                                       | 9.1865     | 2                                          | 0.9173        | 10.0149(0.8716-115.0661) |
| FISTULA, SKIN, HEAD                                             | 0                                       | 0          | 3                                          | 0.8034        | 0(0-Inf)                 |
| FISTULA, SKIN, LOWER EXTREMITY                                  | 1                                       | 7.0567     | 10                                         | 2.7385        | 2.5769(0.3253-20.4105)   |
| FISTULA, SKIN, NECK                                             | 0                                       | 0          | 2                                          | 0.5458        | 0(0-Inf)                 |
| FISTULA, SKIN, NOS                                              | 0                                       | 0          | 2                                          | 0.6774        | 0(0-Inf)                 |
| FISTULA, SKIN, TRUNK                                            | 1                                       | 7.1716     | 10                                         | 2.3477        | 3.0548(0.385-24.238)     |
| FISTULA, SKIN, UPPER EXTREMITY                                  | 0                                       | 0          | 5                                          | 1.4863        | 0(0-Inf)                 |
| FISTULA, SMALL BOWEL                                            | 0                                       | 0          | 3                                          | 0.7885        | 0(0-Inf)                 |
| FISTULA, SUBCUTANEOUS                                           | 0                                       | 0          | 1                                          | 0.3526        | 0(0-Inf)                 |
| FISTULA, SUBMANDIBULAR                                          | 0                                       | 0          | 1                                          | 1.9065        | 0(0-Inf)                 |
| FISTULA, THORACIC DUCT                                          | 0                                       | 0          | 1                                          | 0.3526        | 0(0-Inf)                 |
| FISTULA, THORAX                                                 | 0                                       | 0          | 2                                          | 0.5475        | 0(0-Inf)                 |
| FISTULA, URACHAL                                                | 0                                       | 0          | 1                                          | 0.3526        | 0(0-Inf)                 |
| FISTULA, URETHRORECTAL                                          | 0                                       | 0          | 1                                          | 0.2729        | 0(0-Inf)                 |
| FISTULA, URETHROVAGINAL                                         | 0                                       | 0          | 1                                          | 0.398         | 0(0-Inf)                 |
| FISTULA, URETHROVESICAL                                         | 0                                       | 0          | 1                                          | 1.0367        | 0(0-Inf)                 |
| FISTULA, UTEROVAGINAL                                           | 1                                       | 13.5263    | 0                                          | 0             | 20063394020.8542(0-Inf)  |
| FISTULA, VAGINA, SKIN                                           | 0                                       | 0          | 1                                          | 0.2354        | 0(0-Inf)                 |
| FISTULA, VESICAL                                                | 0                                       | 0          | 1                                          | 0.8529        | 0(0-Inf)                 |
| FISTULA, VESICOCOLIC                                            | 0                                       | 0          | 7                                          | 2.8364        | 0(0-Inf)                 |
| FISTULA, VESICOENTERIC                                          | 0                                       | 0          | 1                                          | 0.3526        | 0(0-Inf)                 |
| FISTULA, VESICOINTESTINAL                                       | 0                                       | 0          | 1                                          | 0.4048        | 0(0-Inf)                 |
| FISTULA, VESICORECTAL                                           | 0                                       | 0          | 1                                          | 0.4751        | 0(0-Inf)                 |
| FISTULA, VESICOSIGMOIDAL                                        | 0                                       | 0          | 3                                          | 2.094         | 0(0-Inf)                 |
| FISTULA, VESICOSIGMOIDOVAGINAL                                  | 0                                       | 0          | 1                                          | 0.4048        | 0(0-Inf)                 |
| FISTULA, VESICOVAGINAL                                          | 0                                       | 0          | 4                                          | 1.3723        | 0(0-Inf)                 |
| FITTING, ARTIFICIAL LEG                                         | 0                                       | 0          | 2                                          | 1.1972        | 0(0-Inf)                 |
| FITTING, BRACE (MILWAUKEE)                                      | 0                                       | 0          | 1                                          | 0.8528        | 0(0-Inf)                 |
| FITTING, DENTAL PROSTHETIC DEVICE                               | 0                                       | 0          | 22                                         | 6.9385        | 0(0-Inf)                 |
| FITTING, HEARING AID                                            | 1                                       | 7.3486     | 18                                         | 5.5874        | 1.3152(0.1744-9.9165)    |
| FITTING, ORTHOTICS (INCLUDES ILL-FITTING ORTHOTICS)             | 0                                       | 0          | 25                                         | 5.8007        | 0(0-Inf)                 |
| FITTING, PROSTHETIC DEVICE, NEC                                 | 0                                       | 0          | 7                                          | 1.918         | 0(0-Inf)                 |
| FIXATION, BLADDER NECK                                          | 0                                       | 0          | 1                                          | 0.8528        | 0(0-Inf)                 |

| Description                                       | No. of Positive Cases with Disease Code | Case Rate* | No. of Positive Controls with Disease Code | Control Rate* | Relative Risk (95%CI)  |
|---------------------------------------------------|-----------------------------------------|------------|--------------------------------------------|---------------|------------------------|
| FIXATION, BOWEL                                   | 0                                       | 0          | 24                                         | 8.9726        | 0(0-Inf)               |
| FIXATION, JOINT, SEE ALSO ANKYLOSIS               | 0                                       | 0          | 1                                          | 0.2354        | 0(0-Inf)               |
| FIXATION, LARYNX                                  | 0                                       | 0          | 1                                          | 0.234         | 0(0-Inf)               |
| FIXATION, PUPIL                                   | 0                                       | 0          | 1                                          | 0.4048        | 0(0-Inf)               |
| FIXATION, STAPES                                  | 0                                       | 0          | 2                                          | 1.1374        | 0(0-Inf)               |
| FIXATION, UTERUS                                  | 0                                       | 0          | 3                                          | 0.8034        | 0(0-Inf)               |
| FIXATION, VOCAL CORD                              | 0                                       | 0          | 2                                          | 1.7057        | 0(0-Inf)               |
| FLACCID, BLADDER                                  | 0                                       | 0          | 2                                          | 0.8097        | 0(0-Inf)               |
| FLAIL, CHEST                                      | 0                                       | 0          | 3                                          | 0.7798        | 0(0-Inf)               |
| FLAIL, JOINT, LOWER EXTREMITY                     | 0                                       | 0          | 1                                          | 0.2729        | 0(0-Inf)               |
| FLAIL, MITRAL POSTERIOR LEAFLET                   | 2                                       | 21.535     | 24                                         | 13.3164       | 1.6172(0.3801-6.8811)  |
| FLASHES, HOT                                      | 1                                       | 24.1703    | 24                                         | 12.6584       | 1.9094(0.2567-14.2006) |
| FLASHES, MOORE'S LIGHTNING                        | 2                                       | 14.376     | 60                                         | 16.9212       | 0.8496(0.2069-3.4888)  |
| FLAT, CHAMBER (ANTERIOR) (EYE)                    | 0                                       | 0          | 4                                          | 1.5795        | 0(0-Inf)               |
| FLAT, FOOT, NOS                                   | 3                                       | 21.0063    | 91                                         | 23.93         | 0.8778(0.2771-2.7813)  |
| FLATULENCE                                        | 4                                       | 31.7351    | 138                                        | 47.6723       | 0.6657(0.2458-1.8027)  |
| FLEXION, JOINT DEFORMITY, SEE ALSO DEFORMITY      | 0                                       | 0          | 4                                          | 1.1419        | 0(0-Inf)               |
| FLOATER (VITREOUS)                                | 15                                      | 106.8719   | 485                                        | 131.262       | 0.8142(0.4864-1.3629)  |
| FLOATERS EYE                                      | 4                                       | 29.5594    | 243                                        | 73.8502       | 0.4003(0.1488-1.0764)  |
| FLOATING, RIB                                     | 0                                       | 0          | 2                                          | 0.6309        | 0(0-Inf)               |
| FLU SEE ALSO INFLUENZAE                           | 0                                       | 0          | 14                                         | 7.0249        | 0(0-Inf)               |
| FLUCTUATING BLOOD PRESSURE                        | 0                                       | 0          | 9                                          | 2.5596        | 0(0-Inf)               |
| FLUID, ABDOMEN                                    | 0                                       | 0          | 7                                          | 1.9825        | 0(0-Inf)               |
| FLUID, CHEST, SEE ALSO EFFUSION, PLEURAL          | 0                                       | 0          | 1                                          | 0.234         | 0(0-Inf)               |
| FLUID, COLLECTION, BRAIN                          | 0                                       | 0          | 3                                          | 1.2104        | 0(0-Inf)               |
| FLUID, COLLECTION, WOUND, POST-OP                 | 0                                       | 0          | 16                                         | 6.3187        | 0(0-Inf)               |
| FLUID, EAR                                        | 0                                       | 0          | 15                                         | 3.639         | 0(0-Inf)               |
| FLUID, JOINT, SEE ALSO EFFUSION                   | 0                                       | 0          | 4                                          | 1.5299        | 0(0-Inf)               |
| FLUID, LUNG, NOS, SEE ALSO EFFUSION, PLEURAL      | 0                                       | 0          | 4                                          | 2.9838        | 0(0-Inf)               |
| FLUID, PERITONEAL CAVITY                          | 0                                       | 0          | 10                                         | 5.121         | 0(0-Inf)               |
| FLUID, PLEURAL CAVITY, SEE ALSO EFFUSION, PLEURAL | 0                                       | 0          | 3                                          | 1.1478        | 0(0-Inf)               |
| FLUID, RETENTION                                  | 0                                       | 0          | 9                                          | 4.891         | 0(0-Inf)               |
| FLUID, SUBDURAL                                   | 0                                       | 0          | 1                                          | 2.4861        | 0(0-Inf)               |
| FLUSHING                                          | 3                                       | 21.1504    | 118                                        | 31.5253       | 0.6709(0.2128-2.1154)  |
| FLUTTER, ATRIAL                                   | 26                                      | 299.331    | 523                                        | 316.1851      | 0.9467(0.6379-1.4049)  |
| FLUTTER, AURICULAR                                | 0                                       | 0          | 2                                          | 0.7054        | 0(0-Inf)               |
| FLUTTER, DIAPHRAGM                                | 0                                       | 0          | 1                                          | 0.2729        | 0(0-Inf)               |
| FLUTTER, VENTRICULAR                              | 0                                       | 0          | 4                                          | 2.9174        | 0(0-Inf)               |
| FOLD, CHOROIDAL                                   | 0                                       | 0          | 5                                          | 1.1412        | 0(0-Inf)               |
| FOLD, RETINAL                                     | 0                                       | 0          | 3                                          | 0.9167        | 0(0-Inf)               |



| Description                                                      | No. of Positive Cases with Disease Code | Case Rate* | No. of Positive Controls with Disease Code | Control Rate* | Relative Risk (95%CI)    |
|------------------------------------------------------------------|-----------------------------------------|------------|--------------------------------------------|---------------|--------------------------|
| FOLLICULITIS, DEMODEX, CODE ALSO INFESTATION #                   | 0                                       | 0          | 3                                          | 1.3867        | 0(0-Inf)                 |
| FOLLICULITIS, NOS                                                | 37                                      | 266.0593   | 975                                        | 252.0309      | 1.0557(0.7596-1.4672)    |
| FORAMEN, OF BOCHDALEK (HERNIA#)                                  | 0                                       | 0          | 3                                          | 1.2146        | 0(0-Inf)                 |
| FORAMEN, OVALE (CONGENITAL HEART)                                | 0                                       | 0          | 2                                          | 0.4853        | 0(0-Inf)                 |
| FOREIGN BODY, AIR PASSAGE, UPPER RESP TRACT, ENTER ORIFICE       | 0                                       | 0          | 1                                          | 1.9062        | 0(0-Inf)                 |
| FOREIGN BODY, ALIMENTARY CANAL, ENTERING ORIFICE                 | 0                                       | 0          | 1                                          | 0.398         | 0(0-Inf)                 |
| FOREIGN BODY, ALVEOLAR PROCESS, ENTERING ORIFICE                 | 0                                       | 0          | 5                                          | 1.372         | 0(0-Inf)                 |
| FOREIGN BODY, ANUS, ENTERING ORIFICE                             | 0                                       | 0          | 2                                          | 0.5476        | 0(0-Inf)                 |
| FOREIGN BODY, ASPIRATION                                         | 1                                       | 32.5208    | 1                                          | 2.422         | 13.4274(0.8332-216.3765) |
| FOREIGN BODY, AUDITORY CANAL, ENTERING ORIFICE                   | 1                                       | 6.946      | 16                                         | 4.0519        | 1.7142(0.2251-13.0523)   |
| FOREIGN BODY, AURICLE, ENTERING ORIFICE                          | 0                                       | 0          | 1                                          | 0.234         | 0(0-Inf)                 |
| FOREIGN BODY, BRONCHUS, ENTERING ORIFICE                         | 2                                       | 16.2148    | 6                                          | 2.1627        | 7.4974(1.4806-37.9658)   |
| FOREIGN BODY, CANTHUS, ENTERING ORIFICE                          | 0                                       | 0          | 1                                          | 0.2729        | 0(0-Inf)                 |
| FOREIGN BODY, CILIARY BODY, ENTERING ORIFICE                     | 0                                       | 0          | 1                                          | 0.234         | 0(0-Inf)                 |
| FOREIGN BODY, CONJUNCTIVA, ENTERING ORIFICE                      | 6                                       | 46.6061    | 214                                        | 54.9981       | 0.8474(0.3759-1.9104)    |
| FOREIGN BODY, CORNEA, ENTERING ORIFICE                           | 7                                       | 77.8161    | 292                                        | 95.5918       | 0.814(0.3843-1.7246)     |
| FOREIGN BODY, DUODENUM, ENTERING ORIFICE                         | 0                                       | 0          | 1                                          | 0.234         | 0(0-Inf)                 |
| FOREIGN BODY, EAR LOBE                                           | 0                                       | 0          | 2                                          | 0.4681        | 0(0-Inf)                 |
| FOREIGN BODY, EAR, ENTERING ORIFICE                              | 1                                       | 7.0186     | 98                                         | 24.2233       | 0.2897(0.0403-2.0809)    |
| FOREIGN BODY, ENTERING ORIFICE OF THE BODY                       | 0                                       | 0          | 1                                          | 2.4885        | 0(0-Inf)                 |
| FOREIGN BODY, ESOPHAGUS, ENTERING ORIFICE                        | 7                                       | 52.9138    | 70                                         | 22.1845       | 2.3852(1.0915-5.2119)    |
| FOREIGN BODY, ESOPHAGUS, WITH PERFORATION, ENTERING ORIFICE      | 0                                       | 0          | 1                                          | 0.4049        | 0(0-Inf)                 |
| FOREIGN BODY, EYE, COMBINED SITE                                 | 0                                       | 0          | 1                                          | 0.4048        | 0(0-Inf)                 |
| FOREIGN BODY, EYE, ENTERING ORIFICE                              | 11                                      | 84.0778    | 382                                        | 96.8036       | 0.8685(0.4764-1.5836)    |
| FOREIGN BODY, EYE, EXTERNAL NOS                                  | 0                                       | 0          | 13                                         | 3.3293        | 0(0-Inf)                 |
| FOREIGN BODY, EYEBALL, NONMAGNETIC                               | 0                                       | 0          | 1                                          | 0.3526        | 0(0-Inf)                 |
| FOREIGN BODY, EYELID, ENTERING ORIFICE                           | 3                                       | 25.1241    | 60                                         | 16.2601       | 1.5451(0.4829-4.9442)    |
| FOREIGN BODY, FACE, CODE ALSO WOUND, OPEN BY SITE, COMPLICATED   | 0                                       | 0          | 10                                         | 2.9252        | 0(0-Inf)                 |
| FOREIGN BODY, GENITOURINARY TRACT, ENTERING ORIFICE              | 0                                       | 0          | 1                                          | 0.234         | 0(0-Inf)                 |
| FOREIGN BODY, GUM, ENTERING ORIFICE                              | 0                                       | 0          | 14                                         | 3.2871        | 0(0-Inf)                 |
| FOREIGN BODY, HEAD, NEC                                          | 0                                       | 0          | 8                                          | 3.9095        | 0(0-Inf)                 |
| FOREIGN BODY, HYPOPHARYNX, ENTERING ORIFICE                      | 0                                       | 0          | 7                                          | 1.7552        | 0(0-Inf)                 |
| FOREIGN BODY, LARGE INTESTINE, ENTERING ORIFICE                  | 0                                       | 0          | 1                                          | 0.8528        | 0(0-Inf)                 |
| FOREIGN BODY, LARYNX, ENTERING ORIFICE                           | 0                                       | 0          | 2                                          | 0.432         | 0(0-Inf)                 |
| FOREIGN BODY, LOWER EXTREMITY, CODE ALSO WOUND, OPEN, SITE, COMP | 3                                       | 23.3468    | 157                                        | 38.6712       | 0.6037(0.1923-1.8952)    |
| FOREIGN BODY, LUNG, ENTERING ORIFICE                             | 1                                       | 14.1415    | 2                                          | 1.5974        | 8.8531(0.7876-99.519)    |

| Description                                                       | No. of Positive Cases with Disease Code | Case Rate* | No. of Positive Controls with Disease Code | Control Rate* | Relative Risk (95%CI)    |
|-------------------------------------------------------------------|-----------------------------------------|------------|--------------------------------------------|---------------|--------------------------|
| FOREIGN BODY, MOUTH, ENTERING ORIFICE                             | 0                                       | 0          | 8                                          | 2.1371        | 0(0-Inf)                 |
| FOREIGN BODY, MULTIPLE AND UNSPECIFIED SITE(S)                    | 2                                       | 15.5894    | 31                                         | 10.5462       | 1.4782(0.3518-6.2111)    |
| FOREIGN BODY, NASOPHARYNX, ENTERING ORIFICE                       | 0                                       | 0          | 1                                          | 0.3527        | 0(0-Inf)                 |
| FOREIGN BODY, NECK                                                | 0                                       | 0          | 4                                          | 1.0917        | 0(0-Inf)                 |
| FOREIGN BODY, NOSE, ENTERING ORIFICE                              | 0                                       | 0          | 3                                          | 0.7062        | 0(0-Inf)                 |
| FOREIGN BODY, NOSTRIL, ENTERING ORIFICE                           | 0                                       | 0          | 3                                          | 0.8186        | 0(0-Inf)                 |
| FOREIGN BODY, OPERATION WOUND                                     | 0                                       | 0          | 4                                          | 0.9708        | 0(0-Inf)                 |
| FOREIGN BODY, ORAL CAVITY, ENTERING ORIFICE                       | 1                                       | 9.6943     | 1                                          | 0.4952        | 19.5755(1.1653-328.8434) |
| FOREIGN BODY, ORBIT, ENTERING ORIFICE                             | 0                                       | 0          | 1                                          | 0.8877        | 0(0-Inf)                 |
| FOREIGN BODY, PENIS, ENTERING ORIFICE                             | 0                                       | 0          | 1                                          | 0.3527        | 0(0-Inf)                 |
| FOREIGN BODY, PHARYNX, ENTERING ORIFICE                           | 3                                       | 23.7038    | 4                                          | 1.3634        | 17.3855(3.7808-79.9447)  |
| FOREIGN BODY, RECTUM, ENTERING ORIFICE                            | 0                                       | 0          | 5                                          | 2.06          | 0(0-Inf)                 |
| FOREIGN BODY, RETINA, ENTERING ORIFICE                            | 0                                       | 0          | 1                                          | 0.3526        | 0(0-Inf)                 |
| FOREIGN BODY, SENSATION, CODE ALSO FOREIGN BODY BY SITE IF STATED | 3                                       | 26.0535    | 91                                         | 36.6269       | 0.7113(0.2247-2.2521)    |
| FOREIGN BODY, STOMACH, ENTERING ORIFICE                           | 0                                       | 0          | 2                                          | 0.4853        | 0(0-Inf)                 |
| FOREIGN BODY, SURGICAL (SUTURE, SPONGE, ETC.)                     | 1                                       | 7.5072     | 19                                         | 5.918         | 1.2685(0.1685-9.5506)    |
| FOREIGN BODY, SWALLOWED                                           | 1                                       | 7.5935     | 19                                         | 4.5406        | 1.6724(0.222-12.5983)    |
| FOREIGN BODY, TEAR DUCT, ENTERING ORIFICE                         | 0                                       | 0          | 1                                          | 0.398         | 0(0-Inf)                 |
| FOREIGN BODY, THROAT, ENTERING ORIFICE                            | 0                                       | 0          | 51                                         | 13.2522       | 0(0-Inf)                 |
| FOREIGN BODY, TONGUE, WITH PERFORATION, ENTERING ORIFICE          | 0                                       | 0          | 4                                          | 0.9158        | 0(0-Inf)                 |
| FOREIGN BODY, TRACHEA, ENTERING ORIFICE                           | 0                                       | 0          | 1                                          | 0.3526        | 0(0-Inf)                 |
| FOREIGN BODY, TRUNK, CODE ALSO WOUND, OPEN BY SITE, COMPLICATED   | 0                                       | 0          | 10                                         | 2.4082        | 0(0-Inf)                 |
| FOREIGN BODY, UPPER EXTREMITY, CODE ALSO WOUND, OPEN, SITE, COMP  | 14                                      | 112.425    | 456                                        | 116.1843      | 0.9676(0.5679-1.6489)    |
| FOREIGN BODY, URETHRA, ENTERING ORIFICE                           | 0                                       | 0          | 1                                          | 2.4857        | 0(0-Inf)                 |
| FOREIGN BODY, VAGINA, ENTERING ORIFICE                            | 0                                       | 0          | 20                                         | 11.3873       | 0(0-Inf)                 |
| FORMATION, BONE IN SCAR                                           | 0                                       | 0          | 3                                          | 0.8187        | 0(0-Inf)                 |
| FORMATION, ECTOPIC BONE, SEE ALSO HETEROTOPIC FORMICATION         | 0                                       | 0          | 2                                          | 0.5908        | 0(0-Inf)                 |
| FORMATION, ECTOPIC BONE, SEE ALSO HETEROTOPIC FORMICATION         | 0                                       | 0          | 2                                          | 0.5709        | 0(0-Inf)                 |
| FOURTH LUMBAR TYPE VERTEBRA                                       | 1                                       | 8.1708     | 2                                          | 0.4727        | 17.2843(1.4931-200.0834) |
| FRACTURE, ACETABULUM                                              | 2                                       | 16.7469    | 41                                         | 15.5273       | 1.0785(0.2597-4.4791)    |
| FRACTURE, ACETABULUM, LATE EFFECT                                 | 0                                       | 0          | 1                                          | 0.398         | 0(0-Inf)                 |
| FRACTURE, ACETABULUM, OLD                                         | 1                                       | 7.8414     | 16                                         | 5.5314        | 1.4176(0.1866-10.7683)   |
| FRACTURE, ACROMION PROCESS                                        | 0                                       | 0          | 9                                          | 3.9086        | 0(0-Inf)                 |
| FRACTURE, ACROMION PROCESS, LATE EFFECT                           | 0                                       | 0          | 3                                          | 2.0483        | 0(0-Inf)                 |
| FRACTURE, ACROMION PROCESS, OLD                                   | 0                                       | 0          | 4                                          | 1.6244        | 0(0-Inf)                 |
| FRACTURE, ANGULATED, CODE ALSO BY SITE                            | 1                                       | 7.7519     | 30                                         | 9.9257        | 0.781(0.1059-5.7576)     |

| Description                                   | No. of Positive Cases with Disease Code | Case Rate* | No. of Positive Controls with Disease Code | Control Rate* | Relative Risk (95%CI)   |
|-----------------------------------------------|-----------------------------------------|------------|--------------------------------------------|---------------|-------------------------|
| FRACTURE, ANKLE                               | 10                                      | 71.4072    | 336                                        | 92.5866       | 0.7712(0.4106-1.4488)   |
| FRACTURE, ANKLE, LATE EFFECT                  | 1                                       | 7.1449     | 33                                         | 9.148         | 0.781(0.1063-5.7382)    |
| FRACTURE, ANKLE, OLD                          | 4                                       | 28.7214    | 149                                        | 42.0047       | 0.6838(0.2527-1.8498)   |
| FRACTURE, ANKLE, OPEN                         | 0                                       | 0          | 8                                          | 2.4026        | 0(0-Inf)                |
| FRACTURE, ARM, NOS                            | 0                                       | 0          | 36                                         | 22.6293       | 0(0-Inf)                |
| FRACTURE, ARTICULAR, CODE ALSO BY SITE        | 1                                       | 7.3629     | 36                                         | 10.7633       | 0.6841(0.0934-5.0112)   |
| FRACTURE, BARTON'S                            | 1                                       | 13.966     | 13                                         | 5.821         | 2.3992(0.3095-18.6003)  |
| FRACTURE, BENNETT'S                           | 0                                       | 0          | 4                                          | 1.1419        | 0(0-Inf)                |
| FRACTURE, BIMALLEOLAR                         | 1                                       | 6.9794     | 93                                         | 24.3617       | 0.2865(0.0399-2.0591)   |
| FRACTURE, BIMALLEOLAR, LATE EFFECT            | 0                                       | 0          | 3                                          | 0.8117        | 0(0-Inf)                |
| FRACTURE, BIMALLEOLAR, OLD                    | 0                                       | 0          | 26                                         | 6.8855        | 0(0-Inf)                |
| FRACTURE, BOXER'S (METACARPAL)                | 0                                       | 0          | 2                                          | 1.1973        | 0(0-Inf)                |
| FRACTURE, BURST, CODE ALSO BY SITE            | 1                                       | 6.9641     | 26                                         | 6.3087        | 1.1039(0.1488-8.1874)   |
| FRACTURE, CALCANEUS                           | 5                                       | 35.0483    | 110                                        | 26.2521       | 1.3351(0.543-3.2828)    |
| FRACTURE, CALCANEUS, LATE EFFECT              | 1                                       | 7.231      | 6                                          | 1.3042        | 5.5444(0.6497-47.3131)  |
| FRACTURE, CALCANEUS, OLD                      | 3                                       | 21.3153    | 29                                         | 7.9246        | 2.6898(0.8123-8.9067)   |
| FRACTURE, CALCANEUS, OPEN                     | 0                                       | 0          | 2                                          | 0.591         | 0(0-Inf)                |
| FRACTURE, CAPITATE (WRIST#)                   | 0                                       | 0          | 5                                          | 1.2017        | 0(0-Inf)                |
| FRACTURE, CAPITATE, LATE EFFECT               | 0                                       | 0          | 1                                          | 0.234         | 0(0-Inf)                |
| FRACTURE, CAPITATE, OLD                       | 0                                       | 0          | 3                                          | 0.6549        | 0(0-Inf)                |
| FRACTURE, CARPAL BONE                         | 0                                       | 0          | 14                                         | 3.9139        | 0(0-Inf)                |
| FRACTURE, CARPAL BONE, LATE EFFECT            | 0                                       | 0          | 1                                          | 0.2729        | 0(0-Inf)                |
| FRACTURE, CARPAL BONE, OLD                    | 0                                       | 0          | 1                                          | 0.3526        | 0(0-Inf)                |
| FRACTURE, CARTILAGE, KNEE                     | 0                                       | 0          | 10                                         | 3.2026        | 0(0-Inf)                |
| FRACTURE, CERVICAL                            | 3                                       | 22.8196    | 33                                         | 10.6252       | 2.1477(0.6542-7.0509)   |
| FRACTURE, CERVICAL, LATE EFFECT               | 1                                       | 8.929      | 4                                          | 1.6895        | 5.2849(0.5775-48.3648)  |
| FRACTURE, CERVICAL, OLD                       | 2                                       | 13.9578    | 9                                          | 2.3992        | 5.8176(1.2341-27.4239)  |
| FRACTURE, CHIP, CODE ALSO FRACTURE BY SITE    | 3                                       | 23.6643    | 82                                         | 19.7721       | 1.1969(0.3769-3.8009)   |
| FRACTURE, CLAVICLE, ACROMIAL END              | 3                                       | 24.9222    | 14                                         | 3.5534        | 7.0136(1.9867-24.7601)  |
| FRACTURE, CLAVICLE, ACROMIAL END, LATE EFFECT | 0                                       | 0          | 2                                          | 0.5069        | 0(0-Inf)                |
| FRACTURE, CLAVICLE, NOS                       | 8                                       | 61.0498    | 173                                        | 55.8921       | 1.0923(0.5365-2.2238)   |
| FRACTURE, CLAVICLE, NOS, LATE EFFECT          | 4                                       | 27.8157    | 7                                          | 1.7449        | 15.9415(4.5483-55.8745) |
| FRACTURE, CLAVICLE, NOS, OLD                  | 1                                       | 7.7753     | 41                                         | 13.6588       | 0.5692(0.078-4.1534)    |
| FRACTURE, CLAVICLE, SHAFT                     | 0                                       | 0          | 12                                         | 2.938         | 0(0-Inf)                |
| FRACTURE, COCCYX                              | 0                                       | 0          | 16                                         | 3.6912        | 0(0-Inf)                |
| FRACTURE, COCCYX, OLD                         | 0                                       | 0          | 1                                          | 0.2354        | 0(0-Inf)                |
| FRACTURE, COLLAR BONE                         | 0                                       | 0          | 1                                          | 0.2354        | 0(0-Inf)                |
| FRACTURE, COLLES'                             | 24                                      | 175.2992   | 368                                        | 86.676        | 2.0225(1.3351-3.0636)   |
| FRACTURE, COLLES', LATE EFFECT                | 0                                       | 0          | 26                                         | 6.1703        | 0(0-Inf)                |
| FRACTURE, COLLES', OLD                        | 7                                       | 49.1318    | 58                                         | 13.8445       | 3.5488(1.6081-7.8317)   |

| Description                                             | No. of Positive Cases with Disease Code | Case Rate* | No. of Positive Controls with Disease Code | Control Rate* | Relative Risk (95%CI)   |
|---------------------------------------------------------|-----------------------------------------|------------|--------------------------------------------|---------------|-------------------------|
| FRACTURE, COMMINUTED, CODE ALSO BY SITE                 | 23                                      | 165.2418   | 568                                        | 155.627       | 1.0618(0.6989-1.6131)   |
| FRACTURE, COMPOUND, CODE ALSO BY SITE, OPEN             | 1                                       | 8.377      | 28                                         | 7.1585        | 1.1702(0.1584-8.6471)   |
| FRACTURE, COMPRESSION, CODE ALSO BY SITE IF STATED--FXC | 60                                      | 629.8067   | 858                                        | 428.0642      | 1.4713(1.1314-1.9133)   |
| FRACTURE, CORACOID PROCESS (SCAPULA#)                   | 0                                       | 0          | 5                                          | 1.3506        | 0(0-Inf)                |
| FRACTURE, CORACOID PROCESS, LATE EFFECT                 | 0                                       | 0          | 1                                          | 0.8528        | 0(0-Inf)                |
| FRACTURE, CORACOID PROCESS, OLD                         | 0                                       | 0          | 3                                          | 1.511         | 0(0-Inf)                |
| FRACTURE, COSTOSTERNAL JUNCTION, SEE ALSO FRACTURE, RIB | 0                                       | 0          | 1                                          | 0.8878        | 0(0-Inf)                |
| FRACTURE, COUGH                                         | 0                                       | 0          | 5                                          | 1.3718        | 0(0-Inf)                |
| FRACTURE, CRUSH, CODE ALSO BY SITE                      | 0                                       | 0          | 9                                          | 2.4517        | 0(0-Inf)                |
| FRACTURE, CUBOID                                        | 1                                       | 8.4548     | 20                                         | 4.5964        | 1.8394(0.2447-13.828)   |
| FRACTURE, CUBOID, OLD                                   | 0                                       | 0          | 2                                          | 0.5069        | 0(0-Inf)                |
| FRACTURE, CUNEIFORM, FOOT                               | 0                                       | 0          | 9                                          | 2.0506        | 0(0-Inf)                |
| FRACTURE, CUNEIFORM, FOOT, OLD                          | 0                                       | 0          | 1                                          | 0.8529        | 0(0-Inf)                |
| FRACTURE, DELAYED HEALING, CODE ALSO BY SITE            | 0                                       | 0          | 14                                         | 3.8622        | 0(0-Inf)                |
| FRACTURE, DELAYED UNION, CODE ALSO BY SITE              | 2                                       | 19.2531    | 27                                         | 12.7854       | 1.5059(0.356-6.3696)    |
| FRACTURE, DEPRESSED, CODE ALSO BY SITE                  | 2                                       | 13.9381    | 33                                         | 8.5211        | 1.6357(0.39-6.8612)     |
| FRACTURE, DIAPHYSIS, CODE ALSO FRACTURE BONE SPECIFIED  | 3                                       | 29.4905    | 32                                         | 15.713        | 1.8768(0.5713-6.1659)   |
| FRACTURE, DISPLACED, ANTERIOR, CODE ALSO BY SITE        | 0                                       | 0          | 5                                          | 1.3257        | 0(0-Inf)                |
| FRACTURE, DISPLACED, LATERAL, CODE ALSO BY SITE         | 0                                       | 0          | 14                                         | 3.1982        | 0(0-Inf)                |
| FRACTURE, DISPLACED, MEDIAL, CODE ALSO BY SITE          | 0                                       | 0          | 5                                          | 1.5556        | 0(0-Inf)                |
| FRACTURE, DISPLACED, NOS, CODE ALSO BY SITE             | 59                                      | 498.921    | 887                                        | 321.1259      | 1.5537(1.1924-2.0244)   |
| FRACTURE, DISPLACED, POSTERIOR, CODE ALSO BY SITE       | 0                                       | 0          | 10                                         | 2.3477        | 0(0-Inf)                |
| FRACTURE, DORSAL, OLD                                   | 0                                       | 0          | 1                                          | 0.234         | 0(0-Inf)                |
| FRACTURE, ELBOW                                         | 0                                       | 0          | 39                                         | 11.8422       | 0(0-Inf)                |
| FRACTURE, ELBOW, LATE EFFECT                            | 0                                       | 0          | 9                                          | 2.821         | 0(0-Inf)                |
| FRACTURE, ELBOW, OLD                                    | 0                                       | 0          | 15                                         | 4.5798        | 0(0-Inf)                |
| FRACTURE, ELBOW, OPEN                                   | 0                                       | 0          | 1                                          | 0.8877        | 0(0-Inf)                |
| FRACTURE, ELBOW, SUPRACONDYLAR, NOS                     | 0                                       | 0          | 1                                          | 0.2354        | 0(0-Inf)                |
| FRACTURE, ELBOW, SUPRACONDYLAR, OLD                     | 0                                       | 0          | 1                                          | 0.4048        | 0(0-Inf)                |
| FRACTURE, EPIPHYSEAL, II, CODE ALSO BY SITE             | 1                                       | 14.0703    | 2                                          | 1.5937        | 8.8285(0.7847-99.3269)  |
| FRACTURE, EPIPHYSEAL, NEC / NOS, CODE ALSO BY SITE      | 1                                       | 7.2786     | 7                                          | 1.6402        | 4.4377(0.5346-36.8367)  |
| FRACTURE, ESSEX-LOPRESTI                                | 1                                       | 6.9306     | 3                                          | 0.7347        | 9.4331(0.9425-94.4175)  |
| FRACTURE, ESSEX-LOPRESTI, OLD                           | 1                                       | 6.889      | 0                                          | 0             | 12235234190.0085(0-Inf) |
| FRACTURE, EXTENSION, CODE ALSO BY SITE                  | 0                                       | 0          | 8                                          | 6.7433        | 0(0-Inf)                |
| FRACTURE, FACE BONE                                     | 1                                       | 8.2978     | 4                                          | 1.4879        | 5.577(0.6073-51.2184)   |
| FRACTURE, FACE BONE, LATE EFFECT                        | 0                                       | 0          | 1                                          | 0.3526        | 0(0-Inf)                |
| FRACTURE, FACE BONE, OLD                                | 0                                       | 0          | 1                                          | 0.8532        | 0(0-Inf)                |
| FRACTURE, FACET, CODE ALSO BY SITE STATED               | 0                                       | 0          | 3                                          | 0.8456        | 0(0-Inf)                |
| FRACTURE, FACIAL                                        | 1                                       | 10.4064    | 23                                         | 12.1924       | 0.8535(0.1148-6.3469)   |
| FRACTURE, FACIAL, LATE EFFECT                           | 0                                       | 0          | 1                                          | 0.2354        | 0(0-Inf)                |

| Description                                                      | No. of Positive Cases with Disease Code | Case Rate* | No. of Positive Controls with Disease Code | Control Rate* | Relative Risk (95%CI)  |
|------------------------------------------------------------------|-----------------------------------------|------------|--------------------------------------------|---------------|------------------------|
| FRACTURE, FACIAL, OLD                                            | 0                                       | 0          | 1                                          | 0.8528        | 0(0-Inf)               |
| FRACTURE, FEMUR, CERVICOTROCHANTERIC                             | 0                                       | 0          | 1                                          | 1.9063        | 0(0-Inf)               |
| FRACTURE, FEMUR, CONDYLE, LATERAL                                | 0                                       | 0          | 8                                          | 2.1924        | 0(0-Inf)               |
| FRACTURE, FEMUR, CONDYLE, LATERAL, LATE EFFECT                   | 0                                       | 0          | 1                                          | 0.8537        | 0(0-Inf)               |
| FRACTURE, FEMUR, CONDYLE, OLD                                    | 0                                       | 0          | 5                                          | 2.0029        | 0(0-Inf)               |
| FRACTURE, FEMUR, DISTAL                                          | 4                                       | 41.9391    | 51                                         | 28.0507       | 1.4951(0.5381-4.1544)  |
| FRACTURE, FEMUR, DISTAL, LATE EFFECT                             | 0                                       | 0          | 9                                          | 2.9333        | 0(0-Inf)               |
| FRACTURE, FEMUR, DISTAL, OLD                                     | 2                                       | 18.5927    | 19                                         | 8.6294        | 2.1546(0.4974-9.3324)  |
| FRACTURE, FEMUR, DISTAL, OPEN                                    | 0                                       | 0          | 2                                          | 1.1613        | 0(0-Inf)               |
| FRACTURE, FEMUR, HEAD                                            | 0                                       | 0          | 3                                          | 2.0942        | 0(0-Inf)               |
| FRACTURE, FEMUR, HEAD, LATE EFFECT                               | 0                                       | 0          | 2                                          | 0.7896        | 0(0-Inf)               |
| FRACTURE, FEMUR, INTERTROCHANTERIC                               | 12                                      | 184.833    | 140                                        | 132.9375      | 1.3904(0.7698-2.5113)  |
| FRACTURE, FEMUR, INTERTROCHANTERIC, LATE EFFECT                  | 0                                       | 0          | 8                                          | 2.7464        | 0(0-Inf)               |
| FRACTURE, FEMUR, INTERTROCHANTERIC, OLD                          | 3                                       | 41.1257    | 46                                         | 39.2494       | 1.0478(0.325-3.3784)   |
| FRACTURE, FEMUR, INTRACAPSULAR                                   | 0                                       | 0          | 2                                          | 0.5912        | 0(0-Inf)               |
| FRACTURE, FEMUR, INTRACAPSULAR, LATE EFFECT                      | 0                                       | 0          | 1                                          | 0.2354        | 0(0-Inf)               |
| FRACTURE, FEMUR, INTRACAPSULAR, OLD                              | 0                                       | 0          | 1                                          | 0.2354        | 0(0-Inf)               |
| FRACTURE, FEMUR, LATE EFFECT                                     | 0                                       | 0          | 22                                         | 9.8482        | 0(0-Inf)               |
| FRACTURE, FEMUR, LOWER END                                       | 0                                       | 0          | 2                                          | 0.5909        | 0(0-Inf)               |
| FRACTURE, FEMUR, LOWER END, LATE EFFECT                          | 0                                       | 0          | 1                                          | 0.2354        | 0(0-Inf)               |
| FRACTURE, FEMUR, LOWER END, OLD                                  | 0                                       | 0          | 2                                          | 0.7053        | 0(0-Inf)               |
| FRACTURE, FEMUR, LOWER END, OPEN                                 | 0                                       | 0          | 1                                          | 0.2729        | 0(0-Inf)               |
| FRACTURE, FEMUR, MEDIAL CONDYLE, SEE ALSO FEMUR LOWER END/DISTAL | 0                                       | 0          | 4                                          | 1.0398        | 0(0-Inf)               |
| FRACTURE, FEMUR, NECK                                            | 27                                      | 371.1717   | 436                                        | 349.6783      | 1.0615(0.7188-1.5674)  |
| FRACTURE, FEMUR, NECK, LATE EFFECT                               | 1                                       | 10.0959    | 27                                         | 14.2247       | 0.7097(0.096-5.2464)   |
| FRACTURE, FEMUR, NECK, OLD                                       | 14                                      | 187.4988   | 197                                        | 154.3807      | 1.2145(0.7051-2.092)   |
| FRACTURE, FEMUR, NOS                                             | 8                                       | 103.7592   | 102                                        | 75.1659       | 1.3804(0.6706-2.8416)  |
| FRACTURE, FEMUR, NOS, OPEN                                       | 0                                       | 0          | 2                                          | 0.5908        | 0(0-Inf)               |
| FRACTURE, FEMUR, OLD                                             | 6                                       | 60.2846    | 66                                         | 33.4438       | 1.8026(0.7783-4.1746)  |
| FRACTURE, FEMUR, PERITROCHANTERIC                                | 0                                       | 0          | 1                                          | 0.8528        | 0(0-Inf)               |
| FRACTURE, FEMUR, PROXIMAL                                        | 0                                       | 0          | 25                                         | 20.1823       | 0(0-Inf)               |
| FRACTURE, FEMUR, PROXIMAL, LATE EFFECT                           | 0                                       | 0          | 3                                          | 1.9769        | 0(0-Inf)               |
| FRACTURE, FEMUR, PROXIMAL, OLD                                   | 1                                       | 10.461     | 6                                          | 3.2429        | 3.2258(0.3821-27.2314) |
| FRACTURE, FEMUR, SHAFT                                           | 1                                       | 10.2211    | 16                                         | 8.3893        | 1.2183(0.1604-9.2522)  |
| FRACTURE, FEMUR, SHAFT, LATE EFFECT                              | 0                                       | 0          | 1                                          | 0.2729        | 0(0-Inf)               |
| FRACTURE, FEMUR, SHAFT, OLD                                      | 0                                       | 0          | 10                                         | 3.4695        | 0(0-Inf)               |
| FRACTURE, FEMUR, SUBCAPITAL                                      | 3                                       | 33.8738    | 58                                         | 35.3278       | 0.9588(0.2995-3.0695)  |
| FRACTURE, FEMUR, SUBCAPITAL, LATE EFFECT                         | 0                                       | 0          | 7                                          | 2.3467        | 0(0-Inf)               |
| FRACTURE, FEMUR, SUBCAPITAL, OLD                                 | 1                                       | 10.4415    | 13                                         | 7.1721        | 1.4558(0.1889-11.2231) |

| Description                                         | No. of Positive Cases with Disease Code | Case Rate* | No. of Positive Controls with Disease Code | Control Rate* | Relative Risk (95%CI)    |
|-----------------------------------------------------|-----------------------------------------|------------|--------------------------------------------|---------------|--------------------------|
| FRACTURE, FEMUR, SUBTROCHANTERIC                    | 4                                       | 58.6228    | 47                                         | 41.0189       | 1.4292(0.5134-3.9786)    |
| FRACTURE, FEMUR, SUBTROCHANTERIC, LATE EFFECT       | 1                                       | 12.149     | 9                                          | 6.198         | 1.9601(0.2459-15.6243)   |
| FRACTURE, FEMUR, SUBTROCHANTERIC, OLD               | 1                                       | 12.9316    | 20                                         | 15.2391       | 0.8486(0.1134-6.3495)    |
| FRACTURE, FEMUR, SUPRACONDYLAR, LATE EFFECT         | 0                                       | 0          | 6                                          | 2.769         | 0(0-Inf)                 |
| FRACTURE, FEMUR, SUPRACONDYLAR, NOS                 | 2                                       | 19.0851    | 47                                         | 22.3879       | 0.8525(0.2063-3.5229)    |
| FRACTURE, FEMUR, SUPRACONDYLAR, OLD                 | 0                                       | 0          | 20                                         | 20.8341       | 0(0-Inf)                 |
| FRACTURE, FEMUR, SUPRACONDYLAR, OPEN                | 0                                       | 0          | 2                                          | 1.1972        | 0(0-Inf)                 |
| FRACTURE, FEMUR, TRANSCERVICAL                      | 0                                       | 0          | 2                                          | 1.7083        | 0(0-Inf)                 |
| FRACTURE, FEMUR, TROCHANTER, GREATER                | 0                                       | 0          | 8                                          | 4.7902        | 0(0-Inf)                 |
| FRACTURE, FEMUR, TROCHANTER, GREATER, OLD           | 0                                       | 0          | 1                                          | 0.3526        | 0(0-Inf)                 |
| FRACTURE, FEMUR, TROCHANTER, LESSER                 | 0                                       | 0          | 3                                          | 1.5757        | 0(0-Inf)                 |
| FRACTURE, FEMUR, TROCHANTER, LESSER, LATE EFFECT    | 0                                       | 0          | 1                                          | 0.2729        | 0(0-Inf)                 |
| FRACTURE, FEMUR, TROCHANTER, NOS, OLD               | 0                                       | 0          | 2                                          | 1.1617        | 0(0-Inf)                 |
| FRACTURE, FIBULA                                    | 6                                       | 43.6251    | 233                                        | 68.0876       | 0.6407(0.2844-1.4432)    |
| FRACTURE, FIBULA, DISTAL                            | 13                                      | 91.412     | 322                                        | 81.7062       | 1.1188(0.6414-1.9514)    |
| FRACTURE, FIBULA, DISTAL, LATE EFFECT               | 2                                       | 13.884     | 10                                         | 2.4914        | 5.5728(1.1971-25.9436)   |
| FRACTURE, FIBULA, DISTAL, OLD                       | 3                                       | 21.7068    | 56                                         | 16.0314       | 1.354(0.4218-4.3465)     |
| FRACTURE, FIBULA, DISTAL, OPEN                      | 0                                       | 0          | 6                                          | 1.7428        | 0(0-Inf)                 |
| FRACTURE, FIBULA, HEAD                              | 0                                       | 0          | 13                                         | 3.4526        | 0(0-Inf)                 |
| FRACTURE, FIBULA, HEAD, OLD                         | 0                                       | 0          | 1                                          | 0.4048        | 0(0-Inf)                 |
| FRACTURE, FIBULA, LATE EFFECT                       | 0                                       | 0          | 12                                         | 3.1772        | 0(0-Inf)                 |
| FRACTURE, FIBULA, NECK, SEE ALSO PROXIMAL/UPPER END | 0                                       | 0          | 2                                          | 0.7051        | 0(0-Inf)                 |
| FRACTURE, FIBULA, OLD                               | 0                                       | 0          | 48                                         | 15.1305       | 0(0-Inf)                 |
| FRACTURE, FIBULA, OPEN                              | 0                                       | 0          | 5                                          | 1.8563        | 0(0-Inf)                 |
| FRACTURE, FIBULA, PROXIMAL                          | 4                                       | 28.2979    | 43                                         | 11.7853       | 2.4011(0.8562-6.7339)    |
| FRACTURE, FIBULA, PROXIMAL, LATE EFFECT             | 1                                       | 7.2316     | 2                                          | 0.5748        | 12.5812(1.0887-145.3942) |
| FRACTURE, FIBULA, PROXIMAL, OLD                     | 0                                       | 0          | 7                                          | 3.8992        | 0(0-Inf)                 |
| FRACTURE, FIBULA, PROXIMAL, OPEN                    | 0                                       | 0          | 1                                          | 0.4048        | 0(0-Inf)                 |
| FRACTURE, FIBULA, SHAFT                             | 2                                       | 15.7191    | 12                                         | 2.9712        | 5.2905(1.1665-23.9955)   |
| FRACTURE, FIBULA, SHAFT, OLD                        | 0                                       | 0          | 2                                          | 1.7766        | 0(0-Inf)                 |
| FRACTURE, FINGER                                    | 7                                       | 48.8664    | 296                                        | 73.6727       | 0.6633(0.313-1.4055)     |
| FRACTURE, FINGER, LATE EFFECT                       | 0                                       | 0          | 9                                          | 2.4509        | 0(0-Inf)                 |
| FRACTURE, FINGER, OLD                               | 1                                       | 6.9358     | 15                                         | 3.8856        | 1.785(0.2336-13.6417)    |
| FRACTURE, FINGER, OPEN                              | 0                                       | 0          | 43                                         | 12.1726       | 0(0-Inf)                 |
| FRACTURE, FOOT, NOS                                 | 3                                       | 22.2876    | 97                                         | 29.4543       | 0.7567(0.2392-2.3941)    |
| FRACTURE, FOOT, NOS, LATE EFFECT                    | 0                                       | 0          | 15                                         | 3.5231        | 0(0-Inf)                 |
| FRACTURE, FOOT, NOS, OLD                            | 2                                       | 14.7824    | 18                                         | 5.4008        | 2.7371(0.6279-11.9315)   |
| FRACTURE, FOREARM                                   | 0                                       | 0          | 17                                         | 7.552         | 0(0-Inf)                 |
| FRACTURE, GALEAZZI'S                                | 0                                       | 0          | 5                                          | 1.1776        | 0(0-Inf)                 |
| FRACTURE, GALEAZZI'S, LATE EFFECT                   | 0                                       | 0          | 1                                          | 0.234         | 0(0-Inf)                 |

| Description                                               | No. of Positive Cases with Disease Code | Case Rate* | No. of Positive Controls with Disease Code | Control Rate* | Relative Risk (95%CI)   |
|-----------------------------------------------------------|-----------------------------------------|------------|--------------------------------------------|---------------|-------------------------|
| FRACTURE, GALEAZZI'S, OLD                                 | 0                                       | 0          | 2                                          | 0.4708        | 0(0-Inf)                |
| FRACTURE, GARDEN TYPE, CODE ALSO BY SITE STATED           | 5                                       | 70.0963    | 92                                         | 78.058        | 0.898(0.3644-2.2132)    |
| FRACTURE, GLENOID CAVITY (SCAPULA #)                      | 0                                       | 0          | 17                                         | 5.6911        | 0(0-Inf)                |
| FRACTURE, GLENOID CAVITY, LATE EFFECT                     | 0                                       | 0          | 4                                          | 1.5027        | 0(0-Inf)                |
| FRACTURE, GLENOID CAVITY, OLD                             | 0                                       | 0          | 5                                          | 3.9422        | 0(0-Inf)                |
| FRACTURE, GREENSTICK, CODE ALSO BY SITE                   | 1                                       | 24.8688    | 0                                          | 0             | 38510169101.9768(0-Inf) |
| FRACTURE, HAMATE                                          | 0                                       | 0          | 6                                          | 1.7747        | 0(0-Inf)                |
| FRACTURE, HAMATE, LATE EFFECT                             | 0                                       | 0          | 1                                          | 0.2729        | 0(0-Inf)                |
| FRACTURE, HAMATE, OLD                                     | 0                                       | 0          | 1                                          | 0.2729        | 0(0-Inf)                |
| FRACTURE, HAND, EXCEPT FINGER                             | 2                                       | 19.6027    | 15                                         | 7.2985        | 2.6859(0.6082-11.8618)  |
| FRACTURE, HAND, EXCEPT FINGER, LATE EFFECT                | 0                                       | 0          | 2                                          | 0.4708        | 0(0-Inf)                |
| FRACTURE, HAND, EXCEPT FINGER, OLD                        | 0                                       | 0          | 4                                          | 1.322         | 0(0-Inf)                |
| FRACTURE, HAND, EXCEPT FINGER, OPEN                       | 0                                       | 0          | 1                                          | 0.3526        | 0(0-Inf)                |
| FRACTURE, HANGMAN'S                                       | 0                                       | 0          | 2                                          | 1.1614        | 0(0-Inf)                |
| FRACTURE, HEEL BONE                                       | 0                                       | 0          | 4                                          | 1.9325        | 0(0-Inf)                |
| FRACTURE, HEEL BONE, LATE EFFECT                          | 0                                       | 0          | 1                                          | 0.3526        | 0(0-Inf)                |
| FRACTURE, HEEL BONE, OLD                                  | 0                                       | 0          | 1                                          | 0.2729        | 0(0-Inf)                |
| FRACTURE, HIP                                             | 35                                      | 612.8976   | 450                                        | 500.9655      | 1.2234(0.8667-1.727)    |
| FRACTURE, HIP, LATE EFFECT                                | 2                                       | 24.5495    | 58                                         | 40.1407       | 0.6116(0.149-2.5099)    |
| FRACTURE, HIP, OLD                                        | 36                                      | 581.5637   | 388                                        | 377.0487      | 1.5424(1.0953-2.1721)   |
| FRACTURE, HUMERUS, CAPITELLUM, SEE ALSO LOWER END HUMERUS | 0                                       | 0          | 3                                          | 0.6535        | 0(0-Inf)                |
| FRACTURE, HUMERUS, CONDYLAR, LATE EFFECT                  | 0                                       | 0          | 1                                          | 0.398         | 0(0-Inf)                |
| FRACTURE, HUMERUS, CONDYLAR, LATERAL                      | 1                                       | 7.303      | 4                                          | 1.1651        | 6.2681(0.6787-57.8876)  |
| FRACTURE, HUMERUS, CONDYLAR, MEDIAL                       | 0                                       | 0          | 2                                          | 0.7896        | 0(0-Inf)                |
| FRACTURE, HUMERUS, CONDYLAR, MEDIAL, OPEN                 | 0                                       | 0          | 1                                          | 0.3527        | 0(0-Inf)                |
| FRACTURE, HUMERUS, CONDYLAR, OLD                          | 0                                       | 0          | 2                                          | 0.4854        | 0(0-Inf)                |
| FRACTURE, HUMERUS, DISTAL (SUPRACONDYLAR)                 | 2                                       | 15.4257    | 25                                         | 8.1026        | 1.9038(0.4472-8.1052)   |
| FRACTURE, HUMERUS, DISTAL, LATE EFFECT                    | 0                                       | 0          | 6                                          | 2.4445        | 0(0-Inf)                |
| FRACTURE, HUMERUS, DISTAL, OLD                            | 0                                       | 0          | 8                                          | 2.5372        | 0(0-Inf)                |
| FRACTURE, HUMERUS, EPICONDYLAR, LATERAL                   | 1                                       | 7.6508     | 4                                          | 1.2941        | 5.9121(0.6425-54.3984)  |
| FRACTURE, HUMERUS, EPICONDYLAR, MEDIAL                    | 0                                       | 0          | 3                                          | 1.5758        | 0(0-Inf)                |
| FRACTURE, HUMERUS, EPICONDYLAR, OLD                       | 0                                       | 0          | 1                                          | 0.3526        | 0(0-Inf)                |
| FRACTURE, HUMERUS, HEAD                                   | 2                                       | 17.7119    | 27                                         | 11.3139       | 1.5655(0.3697-6.6293)   |
| FRACTURE, HUMERUS, HEAD, OLD                              | 0                                       | 0          | 1                                          | 6.4946        | 0(0-Inf)                |
| FRACTURE, HUMERUS, LOWER END (CAPITELLUM)                 | 0                                       | 0          | 3                                          | 0.6986        | 0(0-Inf)                |
| FRACTURE, HUMERUS, LOWER END, OLD                         | 0                                       | 0          | 1                                          | 0.2354        | 0(0-Inf)                |
| FRACTURE, HUMERUS, NECK                                   | 4                                       | 38.0611    | 44                                         | 20.778        | 1.8318(0.6546-5.1259)   |
| FRACTURE, HUMERUS, NECK, LATE EFFECT                      | 0                                       | 0          | 3                                          | 1.2146        | 0(0-Inf)                |
| FRACTURE, HUMERUS, NECK, OLD                              | 1                                       | 8.7997     | 12                                         | 5.026         | 1.7508(0.2252-13.6131)  |

| Description                                                                                 | No. of Positive Cases with Disease Code | Case Rate* | No. of Positive Controls with Disease Code | Control Rate* | Relative Risk (95%CI)    |
|---------------------------------------------------------------------------------------------|-----------------------------------------|------------|--------------------------------------------|---------------|--------------------------|
| FRACTURE, HUMERUS, NOS                                                                      | 10                                      | 101.2122   | 161                                        | 82.65         | 1.2246(0.6451-2.3247)    |
| FRACTURE, HUMERUS, NOS, LATE EFFECT                                                         | 2                                       | 15.3639    | 14                                         | 4.5429        | 3.382(0.7585-15.0786)    |
| FRACTURE, HUMERUS, NOS, OLD                                                                 | 2                                       | 17.4176    | 68                                         | 27.8359       | 0.6257(0.1529-2.5607)    |
| FRACTURE, HUMERUS, NOS, OPEN                                                                | 1                                       | 9.9326     | 1                                          | 0.4941        | 20.1017(1.2016-336.2856) |
| FRACTURE, HUMERUS, PROXIMAL END                                                             | 9                                       | 88.1879    | 257                                        | 124.4564      | 0.7086(0.364-1.3794)     |
| FRACTURE, HUMERUS, PROXIMAL END, FOURTH PART                                                | 0                                       | 0          | 13                                         | 6.3072        | 0(0-Inf)                 |
| FRACTURE, HUMERUS, PROXIMAL END, LATE EFFECT                                                | 0                                       | 0          | 21                                         | 11.9667       | 0(0-Inf)                 |
| FRACTURE, HUMERUS, PROXIMAL END, OLD                                                        | 3                                       | 31.5619    | 97                                         | 53.2817       | 0.5924(0.1874-1.8727)    |
| FRACTURE, HUMERUS, PROXIMAL END, SECOND PART                                                | 0                                       | 0          | 32                                         | 12.237        | 0(0-Inf)                 |
| FRACTURE, HUMERUS, PROXIMAL END, THIRD PART                                                 | 1                                       | 8.9542     | 26                                         | 10.9995       | 0.8141(0.1099-6.0293)    |
| FRACTURE, HUMERUS, SHAFT                                                                    | 4                                       | 35.4212    | 27                                         | 11.1985       | 3.163(1.0974-9.1172)     |
| FRACTURE, HUMERUS, SHAFT, LATE EFFECT                                                       | 2                                       | 20.1991    | 5                                          | 2.5619        | 7.8843(1.4963-41.5453)   |
| FRACTURE, HUMERUS, SHAFT, OLD                                                               | 1                                       | 8.9363     | 8                                          | 3.394         | 2.633(0.3244-21.3717)    |
| FRACTURE, HUMERUS, SUPRACONDYLAR, SEE ALSO DISTAL HUMERUS                                   | 1                                       | 12.311     | 7                                          | 5.2536        | 2.3433(0.2851-19.2574)   |
| FRACTURE, HUMERUS, SURGICAL NECK                                                            | 1                                       | 7.6818     | 68                                         | 22.1132       | 0.3474(0.0481-2.5078)    |
| FRACTURE, HUMERUS, SURGICAL NECK, LATE EFFECT                                               | 0                                       | 0          | 6                                          | 2.1471        | 0(0-Inf)                 |
| FRACTURE, HUMERUS, SURGICAL NECK, OLD                                                       | 0                                       | 0          | 14                                         | 4.696         | 0(0-Inf)                 |
| FRACTURE, HUMERUS, TRANSCONDYLAR                                                            | 0                                       | 0          | 4                                          | 1.5797        | 0(0-Inf)                 |
| FRACTURE, HUMERUS, TRANSCONDYLAR, OLD                                                       | 1                                       | 11.2219    | 0                                          | 0             | 7462266091.1443(0-Inf)   |
| FRACTURE, HUMERUS, TUBEROSITY                                                               | 3                                       | 20.8375    | 48                                         | 11.7751       | 1.7696(0.5477-5.7174)    |
| FRACTURE, HUMERUS, TUBEROSITY, LATE EFFECT                                                  | 0                                       | 0          | 4                                          | 0.952         | 0(0-Inf)                 |
| FRACTURE, HUMERUS, TUBEROSITY, OLD                                                          | 0                                       | 0          | 3                                          | 0.8456        | 0(0-Inf)                 |
| FRACTURE, HUMERUS, UPPER END                                                                | 0                                       | 0          | 1                                          | 0.2354        | 0(0-Inf)                 |
| FRACTURE, HUMERUS, UPPER END, LATE EFFECT                                                   | 0                                       | 0          | 1                                          | 0.2354        | 0(0-Inf)                 |
| FRACTURE, HUMERUS, UPPER END, OLD                                                           | 0                                       | 0          | 1                                          | 0.4048        | 0(0-Inf)                 |
| FRACTURE, ILIUM                                                                             | 1                                       | 10.9387    | 11                                         | 6.2419        | 1.7525(0.2244-13.6844)   |
| FRACTURE, ILIUM, OLD                                                                        | 0                                       | 0          | 2                                          | 1.7768        | 0(0-Inf)                 |
| FRACTURE, IMPACTED, CODE ALSO BY SITE                                                       | 3                                       | 27.5754    | 111                                        | 49.5389       | 0.5566(0.1765-1.7559)    |
| FRACTURE, INFECTED, CODE ALSO BY SITE, OPEN (CURRENT INJURY)                                | 0                                       | 0          | 1                                          | 0.3526        | 0(0-Inf)                 |
| FRACTURE, INFECTED, OLD/LATE EFFECT WITHOUT FOREIGN BODIES, CODE ALSO OSTEOMYELITIS BY SITE | 0                                       | 0          | 4                                          | 0.9707        | 0(0-Inf)                 |
| FRACTURE, INSUFFICIENCY, CODE ALSO BY FRACTURE BY SITE                                      | 6                                       | 65.4826    | 116                                        | 68.4389       | 0.9568(0.4202-2.1786)    |
| FRACTURE, INTERTROCHANTERIC                                                                 | 28                                      | 431.2968   | 269                                        | 244.9314      | 1.7609(1.1917-2.6019)    |
| FRACTURE, INTERTROCHANTERIC, LATE EFFECT                                                    | 2                                       | 19.5805    | 27                                         | 13.26         | 1.4767(0.349-6.248)      |
| FRACTURE, INTERTROCHANTERIC, OLD                                                            | 15                                      | 198.6755   | 149                                        | 115.5407      | 1.7195(1.0091-2.9301)    |
| FRACTURE, INTRA-ARTICULAR, CODE ALSO BY SITE                                                | 8                                       | 57.9515    | 254                                        | 72.6914       | 0.7972(0.3937-1.6143)    |
| FRACTURE, IPSILATERAL, CODE ALSO BY SITE                                                    | 0                                       | 0          | 1                                          | 0.4048        | 0(0-Inf)                 |
| FRACTURE, ISCHIAL RAMUS                                                                     | 1                                       | 6.8963     | 6                                          | 1.4407        | 4.7868(0.5612-40.8317)   |



| Description                                                      | No. of Positive Cases with Disease Code | Case Rate* | No. of Positive Controls with Disease Code | Control Rate* | Relative Risk (95%CI)   |
|------------------------------------------------------------------|-----------------------------------------|------------|--------------------------------------------|---------------|-------------------------|
| FRACTURE, ISCHIUM                                                | 0                                       | 0          | 7                                          | 3.546         | 0(0-Inf)                |
| FRACTURE, ISCHIUM, OLD                                           | 0                                       | 0          | 3                                          | 0.9778        | 0(0-Inf)                |
| FRACTURE, JAW, LOWER                                             | 0                                       | 0          | 1                                          | 0.4751        | 0(0-Inf)                |
| FRACTURE, JAW, NOS                                               | 0                                       | 0          | 3                                          | 0.9608        | 0(0-Inf)                |
| FRACTURE, JAW, NOS, OLD                                          | 0                                       | 0          | 1                                          | 0.8532        | 0(0-Inf)                |
| FRACTURE, JEFFERSON (CERVICAL#)                                  | 0                                       | 0          | 2                                          | 1.1613        | 0(0-Inf)                |
| FRACTURE, JEFFERSON, LATE EFFECT                                 | 0                                       | 0          | 1                                          | 0.4048        | 0(0-Inf)                |
| FRACTURE, JONES                                                  | 0                                       | 0          | 35                                         | 8.1819        | 0(0-Inf)                |
| FRACTURE, JONES, LATE EFFECT                                     | 0                                       | 0          | 1                                          | 0.4751        | 0(0-Inf)                |
| FRACTURE, LA FORTE'S, SEE ALSO FRACTURE MAXILLA                  | 0                                       | 0          | 2                                          | 1.8979        | 0(0-Inf)                |
| FRACTURE, LEG, NOS                                               | 1                                       | 10.5745    | 21                                         | 11.5814       | 0.9131(0.1222-6.8229)   |
| FRACTURE, LINEAR, CODE ALSO BY SITE                              | 2                                       | 14.0613    | 5                                          | 1.3668        | 10.2881(1.9443-54.4376) |
| FRACTURE, LISFRANC (FOOT#) CODE ALSO BY SITE IF STATED           | 2                                       | 17.4452    | 7                                          | 2.8467        | 6.1283(1.2468-30.1208)  |
| FRACTURE, LISFRANC (SITE OTHER FOOT) CODE ALSO BY SITE SPECIFIED | 0                                       | 0          | 3                                          | 0.9776        | 0(0-Inf)                |
| FRACTURE, LUMBAR                                                 | 11                                      | 101.2261   | 134                                        | 58.0712       | 1.7431(0.9399-3.2328)   |
| FRACTURE, LUMBAR, OLD                                            | 2                                       | 16.7635    | 44                                         | 16.7112       | 1.0031(0.2421-4.1562)   |
| FRACTURE, LUNATE                                                 | 0                                       | 0          | 2                                          | 0.7052        | 0(0-Inf)                |
| FRACTURE, LUNATE, OLD                                            | 0                                       | 0          | 3                                          | 0.7411        | 0(0-Inf)                |
| FRACTURE, MAISONNEUVE'S, CODE ALSO BY SITE                       | 0                                       | 0          | 6                                          | 1.4657        | 0(0-Inf)                |
| FRACTURE, MALALIGNED, CODE ALSO BY SITE, LATE EFFECT             | 0                                       | 0          | 1                                          | 0.2354        | 0(0-Inf)                |
| FRACTURE, MALAR BONE                                             | 0                                       | 0          | 3                                          | 0.8713        | 0(0-Inf)                |
| FRACTURE, MALLEOLUS (CHECK FOR MORE SPECIFIC SITE)               | 0                                       | 0          | 4                                          | 4.6633        | 0(0-Inf)                |
| FRACTURE, MALLEOLUS, FIBULAR (EXTERIOR)                          | 0                                       | 0          | 2                                          | 0.6309        | 0(0-Inf)                |
| FRACTURE, MALLEOLUS, FIBULAR, LATE EFFECT                        | 0                                       | 0          | 1                                          | 0.8528        | 0(0-Inf)                |
| FRACTURE, MALLEOLUS, LATERAL                                     | 4                                       | 29.4605    | 212                                        | 49.5218       | 0.5949(0.2209-1.6023)   |
| FRACTURE, MALLEOLUS, LATERAL, LATE EFFECT                        | 0                                       | 0          | 6                                          | 1.4227        | 0(0-Inf)                |
| FRACTURE, MALLEOLUS, LATERAL, OLD                                | 0                                       | 0          | 20                                         | 4.8728        | 0(0-Inf)                |
| FRACTURE, MALLEOLUS, MEDIAL                                      | 4                                       | 27.8865    | 76                                         | 19.7391       | 1.4128(0.5149-3.8765)   |
| FRACTURE, MALLEOLUS, MEDIAL, LATE EFFECT                         | 1                                       | 8.2827     | 4                                          | 1.4875        | 5.5682(0.6062-51.143)   |
| FRACTURE, MALLEOLUS, MEDIAL, OLD                                 | 2                                       | 15.2865    | 17                                         | 5.4753        | 2.7919(0.6379-12.2184)  |
| FRACTURE, MALLEOLUS, TIBIAL (POSTERIOR)                          | 0                                       | 0          | 25                                         | 5.6553        | 0(0-Inf)                |
| FRACTURE, MALLEOLUS, TIBIAL, LATE EFFECT                         | 0                                       | 0          | 1                                          | 0.2354        | 0(0-Inf)                |
| FRACTURE, MALLEOLUS, TIBIAL, OLD                                 | 0                                       | 0          | 4                                          | 0.9236        | 0(0-Inf)                |
| FRACTURE, MALLEUS, OLD                                           | 0                                       | 0          | 2                                          | 0.5709        | 0(0-Inf)                |
| FRACTURE, MALUNION, CODE ALSO BY SITE, LATE EFFECT               | 2                                       | 14.1662    | 33                                         | 8.9208        | 1.588(0.3784-6.6641)    |
| FRACTURE, MANDIBLE                                               | 1                                       | 6.9418     | 20                                         | 5.005         | 1.387(0.1846-10.4203)   |
| FRACTURE, MANDIBLE, OLD                                          | 0                                       | 0          | 5                                          | 2.0353        | 0(0-Inf)                |
| FRACTURE, MANDIBLE, OPEN                                         | 0                                       | 0          | 1                                          | 0.2729        | 0(0-Inf)                |
| FRACTURE, MANUBRIUM STERNI                                       | 0                                       | 0          | 2                                          | 1.0787        | 0(0-Inf)                |

| Description                                                   | No. of Positive Cases with Disease Code | Case Rate* | No. of Positive Controls with Disease Code | Control Rate* | Relative Risk (95%CI)  |
|---------------------------------------------------------------|-----------------------------------------|------------|--------------------------------------------|---------------|------------------------|
| FRACTURE, MARCH, CODE ALSO BY SITE                            | 0                                       | 0          | 2                                          | 0.432         | 0(0-Inf)               |
| FRACTURE, MAXILLA                                             | 1                                       | 7.2273     | 19                                         | 5.5227        | 1.3087(0.1738-9.8512)  |
| FRACTURE, MAXILLA, LATE EFFECT                                | 0                                       | 0          | 1                                          | 0.234         | 0(0-Inf)               |
| FRACTURE, MAXILLA, OLD                                        | 0                                       | 0          | 3                                          | 1.9014        | 0(0-Inf)               |
| FRACTURE, MAXILLARY ANTRUM                                    | 0                                       | 0          | 2                                          | 0.5457        | 0(0-Inf)               |
| FRACTURE, METACARPAL AND PHALANGES (MULTIPLE)                 | 0                                       | 0          | 6                                          | 1.5036        | 0(0-Inf)               |
| FRACTURE, METACARPAL AND PHALANGES, OPEN                      | 0                                       | 0          | 2                                          | 0.4853        | 0(0-Inf)               |
| FRACTURE, METACARPAL BONE                                     | 10                                      | 72.4632    | 230                                        | 66.364        | 1.0919(0.5785-2.061)   |
| FRACTURE, METACARPAL BONE, LATE EFFECT                        | 0                                       | 0          | 3                                          | 1.5764        | 0(0-Inf)               |
| FRACTURE, METACARPAL BONE, OLD                                | 3                                       | 22.4793    | 22                                         | 6.8834        | 3.2657(0.9679-11.0186) |
| FRACTURE, METACARPAL BONE, OPEN                               | 0                                       | 0          | 5                                          | 1.8562        | 0(0-Inf)               |
| FRACTURE, METACARPUS (EXCLUDES FINGER)                        | 0                                       | 0          | 11                                         | 3.4084        | 0(0-Inf)               |
| FRACTURE, METACARPUS, LATE EFFECT                             | 0                                       | 0          | 2                                          | 0.4854        | 0(0-Inf)               |
| FRACTURE, METACARPUS, OLD                                     | 0                                       | 0          | 1                                          | 0.8528        | 0(0-Inf)               |
| FRACTURE, METAPHYSEAL, SEE ALSO EPIPHYSEAL, CODE ALSO BY SITE | 3                                       | 26.4016    | 25                                         | 10.3005       | 2.5631(0.7674-8.5611)  |
| FRACTURE, METATARSAL BONE                                     | 16                                      | 114.8346   | 545                                        | 129.2429      | 0.8885(0.5397-1.4627)  |
| FRACTURE, METATARSAL BONE, LATE EFFECT                        | 0                                       | 0          | 20                                         | 5.2803        | 0(0-Inf)               |
| FRACTURE, METATARSAL BONE, OLD                                | 3                                       | 21.7609    | 90                                         | 25.6657       | 0.8479(0.2675-2.6871)  |
| FRACTURE, METATARSAL BONE, OPEN                               | 0                                       | 0          | 1                                          | 0.2354        | 0(0-Inf)               |
| FRACTURE, MONTEGGIA                                           | 1                                       | 7.4523     | 11                                         | 3.3967        | 2.194(0.2797-17.208)   |
| FRACTURE, MONTEGGIA, LATE EFFECT                              | 0                                       | 0          | 1                                          | 0.2354        | 0(0-Inf)               |
| FRACTURE, MONTEGGIA, OLD                                      | 0                                       | 0          | 3                                          | 0.8018        | 0(0-Inf)               |
| FRACTURE, MULTIPLE                                            | 2                                       | 21.4937    | 49                                         | 27.6583       | 0.7771(0.1884-3.2058)  |
| FRACTURE, MULTIPLE, OLD                                       | 2                                       | 18.7473    | 24                                         | 10.9901       | 1.7058(0.4003-7.2698)  |
| FRACTURE, NAVICULAR, ANKLE                                    | 1                                       | 7.8968     | 30                                         | 6.8826        | 1.1474(0.1555-8.4644)  |
| FRACTURE, NAVICULAR, ANKLE, LATE EFFECT                       | 0                                       | 0          | 1                                          | 0.4049        | 0(0-Inf)               |
| FRACTURE, NAVICULAR, ANKLE, OLD                               | 0                                       | 0          | 6                                          | 1.5149        | 0(0-Inf)               |
| FRACTURE, NAVICULAR, WRIST                                    | 0                                       | 0          | 7                                          | 2.8659        | 0(0-Inf)               |
| FRACTURE, NAVICULAR, WRIST, LATE EFFECT                       | 0                                       | 0          | 1                                          | 0.2729        | 0(0-Inf)               |
| FRACTURE, NECK                                                | 0                                       | 0          | 6                                          | 3.1474        | 0(0-Inf)               |
| FRACTURE, NECK, OLD                                           | 0                                       | 0          | 4                                          | 2.8097        | 0(0-Inf)               |
| FRACTURE, NONUNION, CODE ALSO BY SITE, LATE EFFECT            | 9                                       | 70.1361    | 135                                        | 44.994        | 1.5588(0.7914-3.0702)  |
| FRACTURE, NOS                                                 | 9                                       | 93.7867    | 43                                         | 22.9721       | 4.0826(1.9777-8.428)   |
| FRACTURE, NOS, LATE EFFECT                                    | 0                                       | 0          | 6                                          | 3.1479        | 0(0-Inf)               |
| FRACTURE, NOS, OLD                                            | 3                                       | 33.781     | 35                                         | 21.0867       | 1.602(0.4903-5.2342)   |
| FRACTURE, NOSE                                                | 4                                       | 27.7544    | 153                                        | 38.7924       | 0.7155(0.2646-1.9348)  |
| FRACTURE, NOSE, LATE EFFECT                                   | 0                                       | 0          | 3                                          | 0.7884        | 0(0-Inf)               |
| FRACTURE, NOSE, OLD                                           | 0                                       | 0          | 8                                          | 1.9846        | 0(0-Inf)               |
| FRACTURE, NOSE, OPEN                                          | 0                                       | 0          | 2                                          | 3.083         | 0(0-Inf)               |

| Description                                                       | No. of Positive Cases with Disease Code | Case Rate* | No. of Positive Controls with Disease Code | Control Rate* | Relative Risk (95%CI)  |
|-------------------------------------------------------------------|-----------------------------------------|------------|--------------------------------------------|---------------|------------------------|
| FRACTURE, OBLIQUE, CODE ALSO BY SITE                              | 7                                       | 48.9708    | 123                                        | 31.6519       | 1.5472(0.7199-3.3251)  |
| FRACTURE, ODONTOID (CERVICAL#)                                    | 2                                       | 23.1016    | 18                                         | 11.709        | 1.973(0.4545-8.5642)   |
| FRACTURE, ODONTOID, LATE EFFECT                                   | 0                                       | 0          | 4                                          | 1.9321        | 0(0-Inf)               |
| FRACTURE, ODONTOID, OLD                                           | 2                                       | 23.0773    | 4                                          | 2.4875        | 9.2773(1.6627-51.7644) |
| FRACTURE, OLECRANON                                               | 2                                       | 16.3347    | 52                                         | 18.7459       | 0.8714(0.2114-3.5912)  |
| FRACTURE, OLECRANON, LATE EFFECT                                  | 0                                       | 0          | 3                                          | 1.5759        | 0(0-Inf)               |
| FRACTURE, OLECRANON, OLD                                          | 0                                       | 0          | 24                                         | 11.7578       | 0(0-Inf)               |
| FRACTURE, OLECRANON, OPEN                                         | 0                                       | 0          | 3                                          | 2.824         | 0(0-Inf)               |
| FRACTURE, ORBIT                                                   | 1                                       | 7.1649     | 24                                         | 6.8652        | 1.0437(0.1403-7.7622)  |
| FRACTURE, ORBIT, BLOWOUT                                          | 0                                       | 0          | 5                                          | 1.9395        | 0(0-Inf)               |
| FRACTURE, ORBIT, LATE EFFECT                                      | 0                                       | 0          | 2                                          | 0.6774        | 0(0-Inf)               |
| FRACTURE, ORBIT, OLD                                              | 0                                       | 0          | 6                                          | 1.5771        | 0(0-Inf)               |
| FRACTURE, ORBIT, OPEN                                             | 0                                       | 0          | 1                                          | 0.8878        | 0(0-Inf)               |
| FRACTURE, OS CALCIS                                               | 0                                       | 0          | 5                                          | 1.2806        | 0(0-Inf)               |
| FRACTURE, OS CALCIS, OLD                                          | 0                                       | 0          | 2                                          | 0.471         | 0(0-Inf)               |
| FRACTURE, OS TRIQUETRUM (WRIST#)                                  | 0                                       | 0          | 50                                         | 12.5032       | 0(0-Inf)               |
| FRACTURE, OS TRIQUETRUM, LATE EFFECT                              | 0                                       | 0          | 1                                          | 0.4751        | 0(0-Inf)               |
| FRACTURE, OS TRIQUETRUM, OLD                                      | 0                                       | 0          | 6                                          | 1.6564        | 0(0-Inf)               |
| FRACTURE, OS TRIQUETRUM, OPEN                                     | 0                                       | 0          | 2                                          | 0.8723        | 0(0-Inf)               |
| FRACTURE, OSTEOCHONDRAL, NOS, SEE ALSO RUPTURE LIGAMENT/CARTILAGE | 0                                       | 0          | 1                                          | 0.4751        | 0(0-Inf)               |
| FRACTURE, OSTEOPOROTIC, CODE ALSO FRACTURE BY SITE--FXOS          | 25                                      | 267.0864   | 358                                        | 193.7411      | 1.3786(0.9177-2.0709)  |
| FRACTURE, PALATE, OLD                                             | 0                                       | 0          | 1                                          | 0.8528        | 0(0-Inf)               |
| FRACTURE, PATELLA                                                 | 6                                       | 44.3492    | 159                                        | 47.4477       | 0.9347(0.4127-2.1171)  |
| FRACTURE, PATELLA, LATE EFFECT                                    | 2                                       | 13.9302    | 16                                         | 4.078         | 3.4159(0.775-15.0559)  |
| FRACTURE, PATELLA, OLD                                            | 4                                       | 30.408     | 54                                         | 17.1904       | 1.7689(0.6372-4.9101)  |
| FRACTURE, PATELLA, OPEN                                           | 0                                       | 0          | 1                                          | 0.3526        | 0(0-Inf)               |
| FRACTURE, PATHOLOGIC, CODE ALSO FRACTURE BY SITE                  | 2                                       | 15.9135    | 43                                         | 15.0061       | 1.0605(0.2558-4.397)   |
| FRACTURE, PELVIC BONE, LATE EFFECT                                | 1                                       | 7.825      | 12                                         | 4.0361        | 1.9388(0.2491-15.0899) |
| FRACTURE, PELVIC BONE, NEC                                        | 2                                       | 21.9095    | 13                                         | 7.6411        | 2.8673(0.6406-12.8337) |
| FRACTURE, PELVIC BONE, NOS                                        | 13                                      | 156.9991   | 168                                        | 113.9135      | 1.3782(0.7824-2.428)   |
| FRACTURE, PELVIC BONE, NOS, OPEN                                  | 0                                       | 0          | 1                                          | 0.2729        | 0(0-Inf)               |
| FRACTURE, PELVIC BONE, OLD                                        | 4                                       | 45.1873    | 53                                         | 32.4207       | 1.3938(0.5026-3.8654)  |
| FRACTURE, PELVIC RIM                                              | 0                                       | 0          | 2                                          | 2.5436        | 0(0-Inf)               |
| FRACTURE, PERITROCHANTERIC, LATE EFFECT                           | 0                                       | 0          | 1                                          | 1.9077        | 0(0-Inf)               |
| FRACTURE, PHALANGE, FOOT                                          | 7                                       | 67.4313    | 199                                        | 50.8435       | 1.3263(0.6228-2.8244)  |
| FRACTURE, PHALANGE, FOOT, LATE EFFECT                             | 0                                       | 0          | 4                                          | 0.9708        | 0(0-Inf)               |
| FRACTURE, PHALANGE, FOOT, OLD                                     | 0                                       | 0          | 5                                          | 1.1303        | 0(0-Inf)               |
| FRACTURE, PHALANGE, FOOT, OPEN                                    | 0                                       | 0          | 2                                          | 0.6309        | 0(0-Inf)               |

| Description                                                   | No. of Positive Cases with Disease Code | Case Rate* | No. of Positive Controls with Disease Code | Control Rate* | Relative Risk (95%CI)   |
|---------------------------------------------------------------|-----------------------------------------|------------|--------------------------------------------|---------------|-------------------------|
| FRACTURE, PHALANGE, HAND                                      | 9                                       | 86.942     | 244                                        | 67.25         | 1.2928(0.6635-2.519)    |
| FRACTURE, PHALANGE, HAND, LATE EFFECT                         | 0                                       | 0          | 8                                          | 2.3171        | 0(0-Inf)                |
| FRACTURE, PHALANGE, HAND, OLD                                 | 0                                       | 0          | 13                                         | 3.2157        | 0(0-Inf)                |
| FRACTURE, PHALANGE, HAND, OPEN                                | 1                                       | 8.5655     | 17                                         | 4.5973        | 1.8632(0.2461-14.1036)  |
| FRACTURE, PILON (PYLON), (ANKLE#) CODE ALSO BONE IF SPECIFIED | 0                                       | 0          | 12                                         | 3.6669        | 0(0-Inf)                |
| FRACTURE, PISIFORM                                            | 1                                       | 10.3519    | 7                                          | 2.0237        | 5.1152(0.6185-42.3068)  |
| FRACTURE, PISIFORM, OLD                                       | 0                                       | 0          | 1                                          | 0.8879        | 0(0-Inf)                |
| FRACTURE, PROSTHESIS, NOS, CODE ALSO MALFUNCTION BY SITE      | 0                                       | 0          | 11                                         | 6.8338        | 0(0-Inf)                |
| FRACTURE, PUBIC RAMI, SEE ALSO PUBIS                          | 18                                      | 219.3998   | 215                                        | 146.521       | 1.4974(0.9241-2.4265)   |
| FRACTURE, PUBIS                                               | 1                                       | 8.5793     | 18                                         | 7.2013        | 1.1913(0.1578-8.9939)   |
| FRACTURE, PUBIS, LATE EFFECT                                  | 1                                       | 13.4695    | 6                                          | 4.7273        | 2.8493(0.3389-23.9587)  |
| FRACTURE, PUBIS, OLD                                          | 3                                       | 34.3756    | 48                                         | 30.7386       | 1.1183(0.3471-3.6032)   |
| FRACTURE, RADIUS, DISTAL                                      | 31                                      | 238.6822   | 837                                        | 262.7139      | 0.9085(0.6341-1.3017)   |
| FRACTURE, RADIUS, DISTAL, LATE EFFECT                         | 1                                       | 7.2026     | 31                                         | 8.7538        | 0.8228(0.1117-6.0611)   |
| FRACTURE, RADIUS, DISTAL, OLD                                 | 7                                       | 51.9655    | 170                                        | 51.1756       | 1.0154(0.4757-2.1677)   |
| FRACTURE, RADIUS, DISTAL, OPEN                                | 0                                       | 0          | 12                                         | 4.8916        | 0(0-Inf)                |
| FRACTURE, RADIUS, HEAD                                        | 6                                       | 43.1151    | 171                                        | 39.824        | 1.0826(0.4784-2.4498)   |
| FRACTURE, RADIUS, HEAD, LATE EFFECT                           | 0                                       | 0          | 4                                          | 0.8814        | 0(0-Inf)                |
| FRACTURE, RADIUS, HEAD, OLD                                   | 2                                       | 15.4861    | 25                                         | 5.894         | 2.6274(0.6167-11.1932)  |
| FRACTURE, RADIUS, LOWER END, OLD                              | 0                                       | 0          | 1                                          | 0.234         | 0(0-Inf)                |
| FRACTURE, RADIUS, NECK                                        | 0                                       | 0          | 37                                         | 9.355         | 0(0-Inf)                |
| FRACTURE, RADIUS, NECK, LATE EFFECT                           | 1                                       | 16.8794    | 1                                          | 0.3242        | 52.0645(3.144-862.1779) |
| FRACTURE, RADIUS, NECK, OLD                                   | 0                                       | 0          | 6                                          | 1.7647        | 0(0-Inf)                |
| FRACTURE, RADIUS, NOS                                         | 5                                       | 43.3362    | 102                                        | 41.0391       | 1.056(0.429-2.5993)     |
| FRACTURE, RADIUS, NOS, LATE EFFECT                            | 0                                       | 0          | 1                                          | 0.4048        | 0(0-Inf)                |
| FRACTURE, RADIUS, NOS, OLD                                    | 0                                       | 0          | 14                                         | 9.8358        | 0(0-Inf)                |
| FRACTURE, RADIUS, NOS, OPEN                                   | 0                                       | 0          | 1                                          | 0.4751        | 0(0-Inf)                |
| FRACTURE, RADIUS, PROXIMAL                                    | 0                                       | 0          | 8                                          | 3.2523        | 0(0-Inf)                |
| FRACTURE, RADIUS, PROXIMAL, OLD                               | 0                                       | 0          | 2                                          | 0.7896        | 0(0-Inf)                |
| FRACTURE, RADIUS, SHAFT                                       | 0                                       | 0          | 2                                          | 0.5909        | 0(0-Inf)                |
| FRACTURE, RADIUS, STYLOID PROCESS                             | 1                                       | 7.7749     | 58                                         | 19.3004       | 0.4028(0.0557-2.9159)   |
| FRACTURE, RADIUS, STYLOID PROCESS, LATE EFFECT                | 0                                       | 0          | 3                                          | 0.9165        | 0(0-Inf)                |
| FRACTURE, RADIUS, STYLOID PROCESS, OLD                        | 1                                       | 7.0348     | 7                                          | 1.8536        | 3.7953(0.4573-31.5012)  |
| FRACTURE, RADIUS, UPPER END                                   | 0                                       | 0          | 1                                          | 0.4751        | 0(0-Inf)                |
| FRACTURE, REFRRACTURE, CODE ALSO BY SITE                      | 0                                       | 0          | 6                                          | 2.4219        | 0(0-Inf)                |
| FRACTURE, RIB                                                 | 51                                      | 404.6779   | 942                                        | 309.7201      | 1.3066(0.9848-1.7335)   |
| FRACTURE, RIB, LATE EFFECT                                    | 0                                       | 0          | 12                                         | 6.679         | 0(0-Inf)                |
| FRACTURE, RIB, OLD                                            | 2                                       | 16.732     | 85                                         | 32.3081       | 0.5179(0.1272-2.1092)   |

| Description                                               | No. of Positive Cases with Disease Code | Case Rate* | No. of Positive Controls with Disease Code | Control Rate* | Relative Risk (95%CI)    |
|-----------------------------------------------------------|-----------------------------------------|------------|--------------------------------------------|---------------|--------------------------|
| FRACTURE, SACRUM                                          | 8                                       | 73.9611    | 112                                        | 50.2573       | 1.4716(0.716-3.0247)     |
| FRACTURE, SACRUM, OLD                                     | 1                                       | 8.7861     | 12                                         | 5.0247        | 1.7486(0.2249-13.597)    |
| FRACTURE, SCAPHOID, WRIST                                 | 3                                       | 21.2682    | 76                                         | 21.0561       | 1.0101(0.3176-3.2127)    |
| FRACTURE, SCAPHOID, WRIST, LATE EFFECT                    | 0                                       | 0          | 11                                         | 2.8522        | 0(0-Inf)                 |
| FRACTURE, SCAPHOID, WRIST, OLD                            | 0                                       | 0          | 11                                         | 2.8521        | 0(0-Inf)                 |
| FRACTURE, SCAPULA                                         | 2                                       | 13.9267    | 40                                         | 10.8777       | 1.2803(0.308-5.3217)     |
| FRACTURE, SCAPULA, LATE EFFECT                            | 0                                       | 0          | 1                                          | 0.2729        | 0(0-Inf)                 |
| FRACTURE, SCAPULA, OLD                                    | 1                                       | 10.1712    | 4                                          | 2.0549        | 4.9497(0.5412-45.2708)   |
| FRACTURE, SEGMENTAL, CODE ALSO BY SITE                    | 0                                       | 0          | 4                                          | 1.0119        | 0(0-Inf)                 |
| FRACTURE, SESAMOID, CODE ALSO BY SITE                     | 0                                       | 0          | 3                                          | 0.7175        | 0(0-Inf)                 |
| FRACTURE, SHOULDER BLADE                                  | 0                                       | 0          | 1                                          | 0.8528        | 0(0-Inf)                 |
| FRACTURE, SHOULDER BLADE, LATE EFFECT                     | 0                                       | 0          | 3                                          | 3.9229        | 0(0-Inf)                 |
| FRACTURE, SHOULDER BLADE, OLD                             | 0                                       | 0          | 1                                          | 0.234         | 0(0-Inf)                 |
| FRACTURE, SHOULDER NOS, SEE ALSO HUMERUS, UPPER END       | 2                                       | 21.295     | 28                                         | 15.9485       | 1.3352(0.3163-5.6358)    |
| FRACTURE, SIMPLE, CODE ALSO BY SITE                       | 0                                       | 0          | 1                                          | 0.398         | 0(0-Inf)                 |
| FRACTURE, SINUS, CODE ALSO FRACTURE SKULL, PART SPECIFIED | 1                                       | 12.8107    | 7                                          | 5.0559        | 2.5338(0.3082-20.8309)   |
| FRACTURE, SKULL, BASE                                     | 0                                       | 0          | 8                                          | 2.1256        | 0(0-Inf)                 |
| FRACTURE, SKULL, ETHMOID                                  | 0                                       | 0          | 3                                          | 1.3869        | 0(0-Inf)                 |
| FRACTURE, SKULL, ETHMOID, LATE EFFECT                     | 0                                       | 0          | 2                                          | 0.7897        | 0(0-Inf)                 |
| FRACTURE, SKULL, FRONTAL                                  | 0                                       | 0          | 8                                          | 2.1258        | 0(0-Inf)                 |
| FRACTURE, SKULL, NOS                                      | 1                                       | 10.2008    | 13                                         | 6.6916        | 1.5244(0.1978-11.7469)   |
| FRACTURE, SKULL, NOS, LATE EFFECT                         | 0                                       | 0          | 1                                          | 0.234         | 0(0-Inf)                 |
| FRACTURE, SKULL, OCCIPITAL                                | 0                                       | 0          | 6                                          | 1.5425        | 0(0-Inf)                 |
| FRACTURE, SKULL, OLD                                      | 1                                       | 10.6926    | 5                                          | 2.7506        | 3.8873(0.4469-33.8163)   |
| FRACTURE, SKULL, OPEN                                     | 0                                       | 0          | 1                                          | 0.8877        | 0(0-Inf)                 |
| FRACTURE, SKULL, PARIETAL                                 | 0                                       | 0          | 4                                          | 1.0139        | 0(0-Inf)                 |
| FRACTURE, SKULL, SPHENOID                                 | 0                                       | 0          | 1                                          | 0.8877        | 0(0-Inf)                 |
| FRACTURE, SKULL, TEMPORAL                                 | 0                                       | 0          | 9                                          | 2.2968        | 0(0-Inf)                 |
| FRACTURE, SKULL, TEMPORAL, LATE EFFECT                    | 0                                       | 0          | 1                                          | 0.2729        | 0(0-Inf)                 |
| FRACTURE, SKULL, TEMPORAL, OPEN                           | 0                                       | 0          | 1                                          | 0.8877        | 0(0-Inf)                 |
| FRACTURE, SMITH'S                                         | 0                                       | 0          | 16                                         | 3.7913        | 0(0-Inf)                 |
| FRACTURE, SMITH'S, OLD                                    | 1                                       | 7.2377     | 2                                          | 0.5749        | 12.5888(1.0894-145.4736) |
| FRACTURE, SPIRAL, CODE ALSO BY SITE                       | 8                                       | 55.8181    | 79                                         | 20.1254       | 2.7735(1.3332-5.7699)    |
| FRACTURE, SPONTANEOUS, CODE ALSO FRACTURE BY SITE         | 0                                       | 0          | 3                                          | 0.9773        | 0(0-Inf)                 |
| FRACTURE, STERNUM                                         | 4                                       | 29.0223    | 32                                         | 9.2531        | 3.1365(1.0996-8.9465)    |
| FRACTURE, STERNUM, LATE EFFECT                            | 1                                       | 7.6942     | 1                                          | 0.3293        | 23.3667(1.3839-394.5527) |
| FRACTURE, STERNUM, OLD                                    | 1                                       | 6.9374     | 2                                          | 0.4941        | 14.0391(1.2064-163.3741) |
| FRACTURE, STRESS, CODE ALSO FRACTURE BY SITE              | 11                                      | 79.4799    | 287                                        | 79.5958       | 0.9985(0.5457-1.8271)    |
| FRACTURE, TALUS, NECK                                     | 0                                       | 0          | 6                                          | 1.4564        | 0(0-Inf)                 |

| Description                              | No. of Positive Cases with Disease Code | Case Rate* | No. of Positive Controls with Disease Code | Control Rate* | Relative Risk (95%CI)    |
|------------------------------------------|-----------------------------------------|------------|--------------------------------------------|---------------|--------------------------|
| FRACTURE, TALUS, NOS                     | 0                                       | 0          | 45                                         | 10.5715       | 0(0-Inf)                 |
| FRACTURE, TALUS, NOS, OPEN               | 0                                       | 0          | 1                                          | 0.4049        | 0(0-Inf)                 |
| FRACTURE, TALUS, OLD                     | 0                                       | 0          | 6                                          | 1.6099        | 0(0-Inf)                 |
| FRACTURE, TARSAL BONE                    | 0                                       | 0          | 2                                          | 0.5709        | 0(0-Inf)                 |
| FRACTURE, TARSAL BONE, OLD               | 1                                       | 6.9335     | 1                                          | 0.2545        | 27.2419(1.6055-462.2371) |
| FRACTURE, THORACIC                       | 9                                       | 74.2053    | 127                                        | 46.1935       | 1.6064(0.8144-3.1688)    |
| FRACTURE, THORACIC, LATE EFFECT          | 0                                       | 0          | 3                                          | 2.0491        | 0(0-Inf)                 |
| FRACTURE, THORACIC, OLD                  | 2                                       | 16.9349    | 27                                         | 10.4548       | 1.6198(0.3825-6.8603)    |
| FRACTURE, THUMB                          | 4                                       | 27.9193    | 83                                         | 22.0188       | 1.268(0.4633-3.4706)     |
| FRACTURE, THUMB, LATE EFFECT             | 0                                       | 0          | 2                                          | 0.6309        | 0(0-Inf)                 |
| FRACTURE, THUMB, OLD                     | 0                                       | 0          | 8                                          | 2.3589        | 0(0-Inf)                 |
| FRACTURE, THUMB, OPEN                    | 0                                       | 0          | 5                                          | 1.3793        | 0(0-Inf)                 |
| FRACTURE, TIBIA                          | 6                                       | 44.5856    | 106                                        | 32.3004       | 1.3803(0.6044-3.1524)    |
| FRACTURE, TIBIA, CONDYLE                 | 0                                       | 0          | 4                                          | 1.0275        | 0(0-Inf)                 |
| FRACTURE, TIBIA, CONDYLE, OLD            | 0                                       | 0          | 2                                          | 0.8099        | 0(0-Inf)                 |
| FRACTURE, TIBIA, DISTAL                  | 3                                       | 21.0366    | 79                                         | 20.8823       | 1.0074(0.3169-3.2019)    |
| FRACTURE, TIBIA, DISTAL, LATE EFFECT     | 1                                       | 6.9459     | 9                                          | 2.1693        | 3.2019(0.3987-25.7149)   |
| FRACTURE, TIBIA, DISTAL, OLD             | 1                                       | 7.2366     | 24                                         | 6.8685        | 1.0536(0.1416-7.8415)    |
| FRACTURE, TIBIA, DISTAL, OPEN            | 0                                       | 0          | 5                                          | 1.2667        | 0(0-Inf)                 |
| FRACTURE, TIBIA, INTERCONDYLOID EMINENCE | 0                                       | 0          | 4                                          | 1.1114        | 0(0-Inf)                 |
| FRACTURE, TIBIA, LATE EFFECT             | 0                                       | 0          | 18                                         | 4.4681        | 0(0-Inf)                 |
| FRACTURE, TIBIA, OLD                     | 2                                       | 15.1715    | 55                                         | 17.5314       | 0.8654(0.2103-3.5606)    |
| FRACTURE, TIBIA, OPEN                    | 0                                       | 0          | 6                                          | 2.2098        | 0(0-Inf)                 |
| FRACTURE, TIBIA, PLATEAU                 | 4                                       | 28.5835    | 103                                        | 28.6837       | 0.9965(0.3659-2.7141)    |
| FRACTURE, TIBIA, PLATEAU, LATE EFFECT    | 1                                       | 7.4024     | 11                                         | 3.3147        | 2.2332(0.2842-17.5467)   |
| FRACTURE, TIBIA, PLATEAU, OLD            | 1                                       | 7.6277     | 41                                         | 13.1469       | 0.5802(0.0795-4.2341)    |
| FRACTURE, TIBIA, PLATEAU, OPEN           | 0                                       | 0          | 1                                          | 1.0363        | 0(0-Inf)                 |
| FRACTURE, TIBIA, PROXIMAL                | 5                                       | 38.6744    | 31                                         | 10.1648       | 3.8047(1.4649-9.882)     |
| FRACTURE, TIBIA, PROXIMAL, LATE EFFECT   | 1                                       | 7.1473     | 4                                          | 1.0189        | 7.0149(0.7652-64.3053)   |
| FRACTURE, TIBIA, PROXIMAL, OLD           | 2                                       | 15.2099    | 9                                          | 2.848         | 5.3406(1.1309-25.2199)   |
| FRACTURE, TIBIA, PROXIMAL, OPEN          | 0                                       | 0          | 2                                          | 0.5069        | 0(0-Inf)                 |
| FRACTURE, TIBIA, SHAFT                   | 1                                       | 6.9619     | 9                                          | 2.2536        | 3.0893(0.3856-24.7473)   |
| FRACTURE, TIBIA, SHAFT, OLD              | 0                                       | 0          | 2                                          | 1.7763        | 0(0-Inf)                 |
| FRACTURE, TIBIA, SPINE                   | 0                                       | 0          | 4                                          | 0.9708        | 0(0-Inf)                 |
| FRACTURE, TIBIA, TUBEROSITY              | 0                                       | 0          | 1                                          | 0.8528        | 0(0-Inf)                 |
| FRACTURE, TIBIA, TUBEROSITY, OLD         | 0                                       | 0          | 1                                          | 0.8528        | 0(0-Inf)                 |
| FRACTURE, TOE                            | 8                                       | 56.5479    | 345                                        | 82.4929       | 0.6855(0.3396-1.3837)    |
| FRACTURE, TOE, LATE EFFECT               | 0                                       | 0          | 3                                          | 0.7063        | 0(0-Inf)                 |
| FRACTURE, TOE, OLD                       | 1                                       | 7.0647     | 18                                         | 4.8435        | 1.4586(0.193-11.0262)    |
| FRACTURE, TOE, OPEN                      | 1                                       | 7.2415     | 14                                         | 4.2011        | 1.7237(0.2246-13.2258)   |

| Description                                  | No. of Positive Cases with Disease Code | Case Rate* | No. of Positive Controls with Disease Code | Control Rate* | Relative Risk (95%CI)  |
|----------------------------------------------|-----------------------------------------|------------|--------------------------------------------|---------------|------------------------|
| FRACTURE, TOOTH, NON-TRAUMATIC               | 18                                      | 158.3808   | 681                                        | 279.1859      | 0.5673(0.355-0.9066)   |
| FRACTURE, TOOTH, NOS                         | 26                                      | 186.11     | 576                                        | 148.436       | 1.2538(0.8452-1.8599)  |
| FRACTURE, TRANSVERSE, CODE ALSO BY SITE      | 7                                       | 50.9744    | 126                                        | 36.2777       | 1.4051(0.6542-3.0178)  |
| FRACTURE, TRAPEZIUM                          | 0                                       | 0          | 6                                          | 1.521         | 0(0-Inf)               |
| FRACTURE, TRAPEZOID BONE                     | 0                                       | 0          | 1                                          | 0.2354        | 0(0-Inf)               |
| FRACTURE, TRIMALLEOLAR (ANKLE#)              | 3                                       | 20.8174    | 72                                         | 17.5788       | 1.1842(0.3715-3.7747)  |
| FRACTURE, TRIMALLEOLAR, LATE EFFECT          | 0                                       | 0          | 9                                          | 2.3049        | 0(0-Inf)               |
| FRACTURE, TRIMALLEOLAR, OLD                  | 2                                       | 14.4333    | 19                                         | 5.3624        | 2.6916(0.6197-11.6909) |
| FRACTURE, TRIMALLEOLAR, OPEN                 | 0                                       | 0          | 2                                          | 0.5474        | 0(0-Inf)               |
| FRACTURE, TRIQUETRUM, SEE ALSO OS TRIQUETRUM | 0                                       | 0          | 28                                         | 9.2556        | 0(0-Inf)               |
| FRACTURE, TROCHANTER, GREATER                | 3                                       | 48.7837    | 14                                         | 14.6071       | 3.3397(0.9535-11.6982) |
| FRACTURE, TROCHANTER, GREATER, LATE EFFECT   | 0                                       | 0          | 1                                          | 0.3527        | 0(0-Inf)               |
| FRACTURE, TROCHANTER, GREATER, OLD           | 1                                       | 14.1744    | 5                                          | 4.3652        | 3.2471(0.3746-28.1505) |
| FRACTURE, TROCHANTER, LESSER                 | 0                                       | 0          | 3                                          | 0.9608        | 0(0-Inf)               |
| FRACTURE, TROCHANTER, NOS                    | 1                                       | 12.1017    | 16                                         | 10.7611       | 1.1246(0.1483-8.5298)  |
| FRACTURE, TROCHANTER, NOS, LATE EFFECT       | 0                                       | 0          | 2                                          | 1.7068        | 0(0-Inf)               |
| FRACTURE, TROCHANTER, NOS, OLD               | 0                                       | 0          | 6                                          | 5.4736        | 0(0-Inf)               |
| FRACTURE, ULNA, CORONOID PROCESS             | 1                                       | 6.9431     | 18                                         | 4.5318        | 1.5321(0.2026-11.5845) |
| FRACTURE, ULNA, DISTAL                       | 8                                       | 60.9459    | 78                                         | 24.6604       | 2.4714(1.1878-5.1423)  |
| FRACTURE, ULNA, DISTAL, OPEN                 | 0                                       | 0          | 5                                          | 1.734         | 0(0-Inf)               |
| FRACTURE, ULNA, HEAD                         | 0                                       | 0          | 1                                          | 0.4049        | 0(0-Inf)               |
| FRACTURE, ULNA, LOWER END, LATE EFFECT       | 0                                       | 0          | 5                                          | 1.1873        | 0(0-Inf)               |
| FRACTURE, ULNA, LOWER END, OLD               | 0                                       | 0          | 5                                          | 1.1301        | 0(0-Inf)               |
| FRACTURE, ULNA, NOS                          | 3                                       | 24.6631    | 49                                         | 18.0147       | 1.3691(0.4247-4.4132)  |
| FRACTURE, ULNA, NOS, LATE EFFECT             | 0                                       | 0          | 4                                          | 1.3629        | 0(0-Inf)               |
| FRACTURE, ULNA, NOS, OLD                     | 0                                       | 0          | 6                                          | 1.4225        | 0(0-Inf)               |
| FRACTURE, ULNA, NOS, OPEN                    | 0                                       | 0          | 1                                          | 0.4048        | 0(0-Inf)               |
| FRACTURE, ULNA, OLECRANON PROCESS            | 0                                       | 0          | 2                                          | 2.9789        | 0(0-Inf)               |
| FRACTURE, ULNA, PROXIMAL                     | 1                                       | 8.1681     | 12                                         | 4.3795        | 1.8651(0.24-14.4954)   |
| FRACTURE, ULNA, PROXIMAL, LATE EFFECT        | 0                                       | 0          | 1                                          | 2.4857        | 0(0-Inf)               |
| FRACTURE, ULNA, PROXIMAL, OLD                | 0                                       | 0          | 4                                          | 1.6245        | 0(0-Inf)               |
| FRACTURE, ULNA, SHAFT                        | 2                                       | 19.7829    | 10                                         | 4.9092        | 4.0297(0.8712-18.6395) |
| FRACTURE, ULNA, SHAFT, OLD                   | 0                                       | 0          | 1                                          | 0.4048        | 0(0-Inf)               |
| FRACTURE, ULNA, STYLOID PROCESS              | 8                                       | 59.6596    | 115                                        | 35.0766       | 1.7008(0.8275-3.4959)  |
| FRACTURE, ULNA, STYLOID PROCESS, OPEN        | 0                                       | 0          | 1                                          | 0.8877        | 0(0-Inf)               |
| FRACTURE, UNSTABLE, CODE ALSO BY SITE        | 4                                       | 36.0239    | 45                                         | 19.2292       | 1.8734(0.67-5.2385)    |
| FRACTURE, VERTEBRA                           | 26                                      | 301.7621   | 217                                        | 130.795       | 2.3071(1.533-3.4721)   |
| FRACTURE, VERTEBRA, CERVICAL                 | 2                                       | 16.5003    | 38                                         | 14.0238       | 1.1766(0.2824-4.9021)  |
| FRACTURE, VERTEBRA, CERVICAL, LATE EFFECT    | 0                                       | 0          | 3                                          | 0.741         | 0(0-Inf)               |
| FRACTURE, VERTEBRA, CERVICAL, OLD            | 1                                       | 7.4149     | 7                                          | 2.1808        | 3.4002(0.4115-28.0963) |

| Description                                     | No. of Positive Cases with Disease Code | Case Rate* | No. of Positive Controls with Disease Code | Control Rate* | Relative Risk (95%CI)  |
|-------------------------------------------------|-----------------------------------------|------------|--------------------------------------------|---------------|------------------------|
| FRACTURE, VERTEBRA, DORSAL                      | 0                                       | 0          | 2                                          | 0.5709        | 0(0-Inf)               |
| FRACTURE, VERTEBRA, LATE EFFECT                 | 0                                       | 0          | 5                                          | 1.5652        | 0(0-Inf)               |
| FRACTURE, VERTEBRA, LUMBAR                      | 16                                      | 166.4971   | 287                                        | 148.9102      | 1.1181(0.6748-1.8526)  |
| FRACTURE, VERTEBRA, LUMBAR, LATE EFFECT         | 0                                       | 0          | 12                                         | 4.294         | 0(0-Inf)               |
| FRACTURE, VERTEBRA, LUMBAR, OLD                 | 3                                       | 28.4125    | 48                                         | 22.2219       | 1.2786(0.3965-4.1229)  |
| FRACTURE, VERTEBRA, OLD                         | 8                                       | 91.6389    | 47                                         | 29.0428       | 3.1553(1.4832-6.7126)  |
| FRACTURE, VERTEBRA, SACRUM                      | 0                                       | 0          | 3                                          | 2.0946        | 0(0-Inf)               |
| FRACTURE, VERTEBRA, SACRUM, LATE EFFECT         | 0                                       | 0          | 1                                          | 2.4859        | 0(0-Inf)               |
| FRACTURE, VERTEBRA, THORACIC                    | 24                                      | 252.8019   | 331                                        | 175.0519      | 1.4442(0.9528-2.189)   |
| FRACTURE, VERTEBRA, THORACIC, LATE EFFECT       | 1                                       | 7.5978     | 6                                          | 1.8959        | 4.0075(0.4722-34.0079) |
| FRACTURE, VERTEBRA, THORACIC, OLD               | 5                                       | 48.7304    | 58                                         | 27.9854       | 1.7413(0.6954-4.3603)  |
| FRACTURE, WEBER (B), CODE ALSO FRACTURE BY SITE | 5                                       | 36.3868    | 172                                        | 50.1542       | 0.7255(0.2976-1.7688)  |
| FRACTURE, WRIST, NOS                            | 6                                       | 51.6468    | 209                                        | 83.0442       | 0.6219(0.2758-1.4026)  |
| FRACTURE, WRIST, NOS, LATE EFFECT               | 0                                       | 0          | 16                                         | 5.9414        | 0(0-Inf)               |
| FRACTURE, WRIST, NOS, OLD                       | 1                                       | 9.279      | 57                                         | 25.6133       | 0.3623(0.05-2.6223)    |
| FRACTURE, WRIST, NOS, OPEN                      | 0                                       | 0          | 1                                          | 0.2354        | 0(0-Inf)               |
| FRACTURE, ZYGOMA                                | 2                                       | 13.84      | 24                                         | 6.1938        | 2.2345(0.5239-9.5303)  |
| FRACTURE, ZYGOMA, LATE EFFECT                   | 0                                       | 0          | 2                                          | 0.6774        | 0(0-Inf)               |
| FRACTURE, ZYGOMA, OLD                           | 1                                       | 7.3965     | 3                                          | 0.915         | 8.0838(0.8136-80.3233) |
| FRAGILITAS, UNGUIUM, NOS                        | 0                                       | 0          | 2                                          | 0.5837        | 0(0-Inf)               |
| FRAGILITY OF CAPILLARIES                        | 0                                       | 0          | 2                                          | 1.0787        | 0(0-Inf)               |
| FRECKLE, MELANOTIC, HUTCHINSON                  | 0                                       | 0          | 2                                          | 0.5069        | 0(0-Inf)               |
| FRECKLE, NOS                                    | 1                                       | 7.2955     | 22                                         | 5.0876        | 1.434(0.1918-10.7225)  |
| FREQUENCY OF URINATION                          | 62                                      | 574.7293   | 1378                                       | 591.6749      | 0.9714(0.7526-1.2537)  |
| FRIABILITY, GASTROINTESTINAL (ANY)              | 2                                       | 18.3916    | 33                                         | 14.5815       | 1.2613(0.3011-5.2838)  |
| FRIABILITY, ESOPHAGUS                           | 0                                       | 0          | 3                                          | 2.0476        | 0(0-Inf)               |
| FRIABLE, ESOPHAGUS                              | 0                                       | 0          | 3                                          | 1.5756        | 0(0-Inf)               |
| FRIABLE, GASTROINTESTINAL TRACT, LOWER          | 1                                       | 13.0426    | 11                                         | 7.9793        | 1.6346(0.2095-12.7526) |
| FRIABLE, GASTROINTESTINAL TRACT, UPPER          | 1                                       | 11.9476    | 12                                         | 7.7766        | 1.5364(0.1983-11.9054) |
| FRIABLE, GENITOURINARY SYSTEM                   | 2                                       | 33.2947    | 35                                         | 34.5531       | 0.9636(0.2312-4.0157)  |
| FRICTION (PRECORDIAL)                           | 0                                       | 0          | 7                                          | 2.0947        | 0(0-Inf)               |
| FROSTBITE, FACE                                 | 0                                       | 0          | 1                                          | 0.2354        | 0(0-Inf)               |
| FROSTBITE, FOOT                                 | 0                                       | 0          | 8                                          | 2.0809        | 0(0-Inf)               |
| FROSTBITE, HAND                                 | 2                                       | 14.5109    | 8                                          | 2.4481        | 5.9273(1.2388-28.3609) |
| FROSTBITE, NEC AND NOS                          | 0                                       | 0          | 11                                         | 3.1287        | 0(0-Inf)               |
| FROZEN, HAND                                    | 0                                       | 0          | 1                                          | 6.4788        | 0(0-Inf)               |
| FROZEN, SHOULDER                                | 4                                       | 28.4152    | 189                                        | 51.639        | 0.5503(0.2041-1.4839)  |
| FULLNESS, EAR                                   | 4                                       | 27.8943    | 128                                        | 32.4836       | 0.8587(0.3166-2.3292)  |
| FUNCTIONAL, BLADDER COMPLAINTS                  | 0                                       | 0          | 1                                          | 0.2729        | 0(0-Inf)               |
| FUNCTIONAL, BOWEL COMPLAINTS                    | 0                                       | 0          | 35                                         | 8.065         | 0(0-Inf)               |



| Description                                               | No. of Positive Cases with Disease Code | Case Rate* | No. of Positive Controls with Disease Code | Control Rate* | Relative Risk (95%CI)      |
|-----------------------------------------------------------|-----------------------------------------|------------|--------------------------------------------|---------------|----------------------------|
| FUNCTIONAL, GASTROINTESTINAL COMPLAINTS                   | 0                                       | 0          | 4                                          | 2.3948        | 0(0-Inf)                   |
| FUNDUS FLAVIMACULATUS                                     | 0                                       | 0          | 2                                          | 0.5458        | 0(0-Inf)                   |
| FURUNCLE, ARM, UPPER                                      | 0                                       | 0          | 3                                          | 0.7798        | 0(0-Inf)                   |
| FURUNCLE, AUDITORY CANAL, EXTERNAL                        | 0                                       | 0          | 50                                         | 12.6943       | 0(0-Inf)                   |
| FURUNCLE, AXILLA                                          | 2                                       | 16.3926    | 38                                         | 8.9251        | 1.8367(0.4403-7.661)       |
| FURUNCLE, BUTTOCK                                         | 0                                       | 0          | 24                                         | 5.6286        | 0(0-Inf)                   |
| FURUNCLE, EYELID                                          | 1                                       | 12.0544    | 4                                          | 1.2602        | 9.5651(1.0417-87.8287)     |
| FURUNCLE, FOREARM                                         | 1                                       | 16.3451    | 6                                          | 2.1934        | 7.4519(0.881-63.0355)      |
| FURUNCLE, HAND                                            | 0                                       | 0          | 9                                          | 3.1657        | 0(0-Inf)                   |
| FURUNCLE, LABIA                                           | 0                                       | 0          | 24                                         | 13.1507       | 0(0-Inf)                   |
| FURUNCLE, LOWER EXTREMITY                                 | 0                                       | 0          | 25                                         | 6.6936        | 0(0-Inf)                   |
| FURUNCLE, MULTIPLE SITES                                  | 0                                       | 0          | 5                                          | 1.4721        | 0(0-Inf)                   |
| FURUNCLE, NECK                                            | 0                                       | 0          | 12                                         | 3.4157        | 0(0-Inf)                   |
| FURUNCLE, NOS, SEE ALSO BOIL/CARBUNCLE                    | 4                                       | 28.2794    | 193                                        | 47.3327       | 0.5975(0.2216-1.6106)      |
| FURUNCLE, PERINEUM                                        | 0                                       | 0          | 6                                          | 1.3474        | 0(0-Inf)                   |
| FURUNCLE, SCALP                                           | 0                                       | 0          | 6                                          | 1.4352        | 0(0-Inf)                   |
| FURUNCLE, SCROTUM                                         | 0                                       | 0          | 6                                          | 1.7429        | 0(0-Inf)                   |
| FURUNCLE, TRUNK                                           | 2                                       | 13.9227    | 66                                         | 16.1789       | 0.8605(0.21-3.5261)        |
| FURUNCLE, VULVA                                           | 0                                       | 0          | 6                                          | 2.1393        | 0(0-Inf)                   |
| FURUNCULOSIS                                              | 0                                       | 0          | 13                                         | 4.8151        | 0(0-Inf)                   |
| FUSION, AORTIC CUSPS, CONGENITAL                          | 0                                       | 0          | 1                                          | 0.2354        | 0(0-Inf)                   |
| FUSION, FINGERS                                           | 0                                       | 0          | 1                                          | 0.2729        | 0(0-Inf)                   |
| FUSION, JOINT, NOS, SEE ALSO ANKYLOSIS                    | 0                                       | 0          | 1                                          | 0.8877        | 0(0-Inf)                   |
| FUSION, SPINE, NOS                                        | 0                                       | 0          | 7                                          | 1.9652        | 0(0-Inf)                   |
| FUSION, SPINE, NOS, CONGENITAL                            | 0                                       | 0          | 3                                          | 1.7281        | 0(0-Inf)                   |
| GAGGING                                                   | 2                                       | 21.9324    | 5                                          | 2.8491        | 7.698(1.4656-40.4325)      |
| GALACTORRHEA, IN PUERPERIUM                               | 0                                       | 0          | 14                                         | 14.3774       | 0(0-Inf)                   |
| GALACTORRHEA, NON-PUERPERAL                               | 0                                       | 0          | 14                                         | 6.0522        | 0(0-Inf)                   |
| GALACTOSURIA                                              | 0                                       | 0          | 1                                          | 0.4049        | 0(0-Inf)                   |
| GALLOP RHYTHM                                             | 0                                       | 0          | 4                                          | 1.7192        | 0(0-Inf)                   |
| GALLSTONE, NOS                                            | 9                                       | 66.4675    | 357                                        | 106.5357      | 0.6239(0.3216-1.2105)      |
| GAMBLER (PATHOLOGIC)                                      | 0                                       | 0          | 9                                          | 2.8437        | 0(0-Inf)                   |
| GAME KEEPER'S THUMB                                       | 0                                       | 0          | 29                                         | 7.6633        | 0(0-Inf)                   |
| GAMMOPATHY, MONOCLONAL                                    | 173                                     | 1637.839   | 18                                         | 5.9521        | 275.1684(169.0152-447.993) |
| GAMMOPATHY, MONOCLONAL OF UNDETERMINED SIGNIFICANCE--MGUS | 233                                     | 2355.288   | 57                                         | 22.8044       | 103.2824(77.1318-138.2989) |
| GAMMOPATHY, MONOCLONAL, BETA                              | 1                                       | 7.2207     | 0                                          | 0             | 12748205362.8755(0-Inf)    |
| GAMMOPATHY, POLYCLONAL                                    | 3                                       | 24.226     | 20                                         | 7.1365        | 3.3946(0.9984-11.5418)     |
| GANGLION, JOINT, NOS, SEE ALSO CYST, GANGLION             | 1                                       | 6.9503     | 31                                         | 7.5687        | 0.9183(0.1247-6.7635)      |
| GANGLION, WRIST                                           | 7                                       | 59.735     | 178                                        | 42.4273       | 1.4079(0.6599-3.004)       |

| Description                                                           | No. of Positive Cases with Disease Code | Case Rate* | No. of Positive Controls with Disease Code | Control Rate* | Relative Risk (95%CI)   |
|-----------------------------------------------------------------------|-----------------------------------------|------------|--------------------------------------------|---------------|-------------------------|
| GANGLIONEUROMA, ADRENAL GLAND                                         | 0                                       | 0          | 1                                          | 0.4049        | 0(0-Inf)                |
| GANGLIONEUROMA, NOS                                                   | 0                                       | 0          | 3                                          | 0.8018        | 0(0-Inf)                |
| GANGRENE, ARTERIOSCLEROTIC, LOWER EXTREMITY                           | 0                                       | 0          | 14                                         | 7.3276        | 0(0-Inf)                |
| GANGRENE, ARTERIOSCLEROTIC, NOS                                       | 0                                       | 0          | 1                                          | 0.853         | 0(0-Inf)                |
| GANGRENE, DIABETIC                                                    | 0                                       | 0          | 3                                          | 0.6548        | 0(0-Inf)                |
| GANGRENE, GALLBLADDER                                                 | 0                                       | 0          | 4                                          | 1.9298        | 0(0-Inf)                |
| GANGRENE, GAS                                                         | 0                                       | 0          | 3                                          | 0.9773        | 0(0-Inf)                |
| GANGRENE, INTESTINE                                                   | 0                                       | 0          | 6                                          | 2.7534        | 0(0-Inf)                |
| GANGRENE, LOWER EXTREMITY                                             | 6                                       | 70.8319    | 76                                         | 48.0888       | 1.4729(0.6397-3.3914)   |
| GANGRENE, NOS                                                         | 0                                       | 0          | 9                                          | 5.5399        | 0(0-Inf)                |
| GANGRENE, PENIS, NOS                                                  | 1                                       | 6.8894     | 0                                          | 0             | 12239012325.5634(0-Inf) |
| GANGRENE, RAYNAUD'S                                                   | 0                                       | 0          | 1                                          | 0.8273        | 0(0-Inf)                |
| GANGRENE, UPPER EXTREMITY                                             | 0                                       | 0          | 10                                         | 3.4175        | 0(0-Inf)                |
| GAS, ABDOMINAL                                                        | 3                                       | 28.3278    | 101                                        | 46.4595       | 0.6097(0.193-1.9264)    |
| GAS, INTESTINAL                                                       | 0                                       | 0          | 41                                         | 18.6206       | 0(0-Inf)                |
| GASTRITIS, ALCOHOLIC                                                  | 2                                       | 14.0084    | 19                                         | 5.3398        | 2.6234(0.6059-11.359)   |
| GASTRITIS, ALKALINE                                                   | 0                                       | 0          | 7                                          | 1.6561        | 0(0-Inf)                |
| GASTRITIS, ANTRAL                                                     | 27                                      | 211.4984   | 594                                        | 197.2996      | 1.072(0.728-1.5784)     |
| GASTRITIS, ASPIRIN                                                    | 2                                       | 13.9175    | 34                                         | 8.1434        | 1.709(0.4076-7.1651)    |
| GASTRITIS, ATROPHIC                                                   | 4                                       | 41.6553    | 65                                         | 34.084        | 1.2221(0.4439-3.3648)   |
| GASTRITIS, CHRONIC                                                    | 21                                      | 171.4485   | 447                                        | 161.8392      | 1.0594(0.683-1.6433)    |
| GASTRITIS, DRUG-INDUCED, CODE ALSO EFFECT, ADVERSE BY DRUG, IF STATED | 4                                       | 29.6094    | 104                                        | 31.1436       | 0.9507(0.3492-2.5886)   |
| GASTRITIS, EROSION (ACUTE)                                            | 7                                       | 51.6686    | 112                                        | 34.1477       | 1.5131(0.7028-3.2576)   |
| GASTRITIS, HEMORRHAGIC                                                | 2                                       | 16.8856    | 29                                         | 11.2622       | 1.4993(0.3557-6.319)    |
| GASTRITIS, NOS, SEE ALSO GASTROENTERITIS                              | 43                                      | 332.8674   | 1018                                       | 329.4912      | 1.0102(0.7439-1.372)    |
| GASTRITIS, PERISTOMAL                                                 | 0                                       | 0          | 4                                          | 1.215         | 0(0-Inf)                |
| GASTRITIS, VARIOLIFORM                                                | 0                                       | 0          | 4                                          | 1.1418        | 0(0-Inf)                |
| GASTRODUODENITIS                                                      | 0                                       | 0          | 9                                          | 2.7502        | 0(0-Inf)                |
| GASTROENTERITIS, ALLERGIC                                             | 0                                       | 0          | 2                                          | 0.6309        | 0(0-Inf)                |
| GASTROENTERITIS, EOSINOPHILIC                                         | 0                                       | 0          | 4                                          | 0.9708        | 0(0-Inf)                |
| GASTROENTERITIS, HEMORRHAGIC                                          | 0                                       | 0          | 4                                          | 0.9521        | 0(0-Inf)                |
| GASTROENTERITIS, INFECTIOUS                                           | 0                                       | 0          | 9                                          | 2.3054        | 0(0-Inf)                |
| GASTROENTERITIS, NOS, SEE ALSO ENTERITIS                              | 58                                      | 446.469    | 1314                                       | 399.4099      | 1.1178(0.8586-1.4553)   |
| GASTROENTERITIS, VIRAL, NOS                                           | 21                                      | 149.5591   | 417                                        | 108.3967      | 1.3797(0.8886-2.1424)   |
| GASTROPARESIS, DIABETIC, CODE ALSO DIABETES WITH NEURO COMPLICATION#  | 0                                       | 0          | 24                                         | 8.966         | 0(0-Inf)                |
| GASTROPARESIS, NOS                                                    | 2                                       | 16.0274    | 18                                         | 6.3693        | 2.5164(0.5783-10.9489)  |
| GASTROPATHY, CONGESTIVE                                               | 1                                       | 9.0447     | 25                                         | 10.7739       | 0.8395(0.1132-6.224)    |
| GASTROPATHY, NOS                                                      | 17                                      | 141.935    | 431                                        | 162.3551      | 0.8742(0.5377-1.4212)   |

| Description                                         | No. of Positive Cases with Disease Code |            | No. of Positive Controls with Disease Code |               | Relative Risk (95%CI)  |
|-----------------------------------------------------|-----------------------------------------|------------|--------------------------------------------|---------------|------------------------|
|                                                     |                                         | Case Rate* |                                            | Control Rate* |                        |
| GASTROSTAXIS                                        | 0                                       | 0          | 1                                          | 0.2729        | 0(0-Inf)               |
| GENU, RECURVATUM, NOS                               | 0                                       | 0          | 7                                          | 1.7375        | 0(0-Inf)               |
| GENU, VALGUM, NOS                                   | 2                                       | 14.1023    | 19                                         | 4.9889        | 2.8267(0.6507-12.2794) |
| GENU, VARUM, NOS                                    | 2                                       | 14.0511    | 39                                         | 10.7919       | 1.302(0.3129-5.4184)   |
| GEOGRAPHIC TONGUE                                   | 1                                       | 6.9299     | 35                                         | 8.5676        | 0.8088(0.1103-5.9336)  |
| GHON, COMPLEX OR TUBERCLE, NOS                      | 0                                       | 0          | 3                                          | 0.7461        | 0(0-Inf)               |
| GHOST VESSELS CORNEA                                | 0                                       | 0          | 1                                          | 0.8881        | 0(0-Inf)               |
| GIARDIASIS                                          | 4                                       | 32.6254    | 120                                        | 28.4109       | 1.1483(0.4228-3.1187)  |
| GIDDINESS (ORTHOSTATIC)                             | 1                                       | 6.9504     | 23                                         | 5.73          | 1.213(0.1627-9.0439)   |
| GINGIVITIS, ACUTE                                   | 0                                       | 0          | 8                                          | 2.5374        | 0(0-Inf)               |
| GINGIVITIS, CHRONIC                                 | 0                                       | 0          | 34                                         | 13.0735       | 0(0-Inf)               |
| GINGIVITIS, DESQUAMATIVE                            | 0                                       | 0          | 4                                          | 1.3732        | 0(0-Inf)               |
| GINGIVITIS, MARGINAL                                | 3                                       | 23.7206    | 14                                         | 3.3412        | 7.0995(2.0072-25.111)  |
| GINGIVITIS, NECROTIZING                             | 0                                       | 0          | 3                                          | 1.6178        | 0(0-Inf)               |
| GINGIVITIS, NOS                                     | 5                                       | 36.2646    | 208                                        | 48.5547       | 0.7469(0.307-1.8168)   |
| GINGIVITIS, ULCERATIVE                              | 0                                       | 0          | 4                                          | 1.6683        | 0(0-Inf)               |
| GINGIVITIS, VINCENT'S                               | 0                                       | 0          | 1                                          | 0.3526        | 0(0-Inf)               |
| GINGIVOSIS                                          | 0                                       | 0          | 2                                          | 0.631         | 0(0-Inf)               |
| GINGIVOSTOMATITIS                                   | 0                                       | 0          | 1                                          | 0.4048        | 0(0-Inf)               |
| GLAUCOMA, ABSOLUTE                                  | 0                                       | 0          | 5                                          | 1.1779        | 0(0-Inf)               |
| GLAUCOMA, ACUTE                                     | 0                                       | 0          | 1                                          | 0.8528        | 0(0-Inf)               |
| GLAUCOMA, ACUTE (PRIMARY) NARROW ANGLE              | 0                                       | 0          | 2                                          | 0.571         | 0(0-Inf)               |
| GLAUCOMA, ANGLE CLOSURE, ACUTE                      | 1                                       | 8.1516     | 25                                         | 9.039         | 0.9018(0.1215-6.6949)  |
| GLAUCOMA, ANGLE CLOSURE, INTERMITTENT               | 0                                       | 0          | 1                                          | 0.2729        | 0(0-Inf)               |
| GLAUCOMA, ANGLE RECESSION, CODE ALSO SPECIFIED TYPE | 0                                       | 0          | 1                                          | 0.2729        | 0(0-Inf)               |
| GLAUCOMA, APHAKIC, CODE ALSO TYPE SPECIFIED         | 0                                       | 0          | 2                                          | 2.5451        | 0(0-Inf)               |
| GLAUCOMA, CAPSULARE                                 | 1                                       | 13.451     | 13                                         | 10.3799       | 1.2959(0.1685-9.9681)  |
| GLAUCOMA, CHRONIC, NARROW ANGLE                     | 0                                       | 0          | 7                                          | 2.7972        | 0(0-Inf)               |
| GLAUCOMA, CHRONIC, NOS                              | 2                                       | 14.4498    | 68                                         | 19.3994       | 0.7449(0.182-3.0492)   |
| GLAUCOMA, CHRONIC, SIMPLE                           | 3                                       | 28.8734    | 47                                         | 22.0835       | 1.3075(0.4053-4.2181)  |
| GLAUCOMA, CLOSED ANGLE                              | 0                                       | 0          | 52                                         | 15.325        | 0(0-Inf)               |
| GLAUCOMA, CLOSED ANGLE, CHRONIC                     | 1                                       | 7.5728     | 38                                         | 12.0654       | 0.6277(0.0858-4.5899)  |
| GLAUCOMA, COMBINED MECHANISM TYPE                   | 1                                       | 12.9878    | 3                                          | 2.425         | 5.3558(0.5468-52.4546) |
| GLAUCOMA, CONGENITAL                                | 0                                       | 0          | 3                                          | 2.0941        | 0(0-Inf)               |
| GLAUCOMA, CUPPING                                   | 0                                       | 0          | 1                                          | 0.3526        | 0(0-Inf)               |
| GLAUCOMA, EXFOLIATION                               | 4                                       | 45.7764    | 94                                         | 57.7345       | 0.7929(0.2909-2.1612)  |
| GLAUCOMA, LOW TENSION                               | 7                                       | 66.604     | 134                                        | 62.6157       | 1.0637(0.4963-2.2799)  |
| GLAUCOMA, MIXED MECHANISM TYPE                      | 1                                       | 8.5113     | 8                                          | 3.0991        | 2.7463(0.3384-22.29)   |
| GLAUCOMA, NARROW ANGLE                              | 0                                       | 0          | 27                                         | 12.3976       | 0(0-Inf)               |
| GLAUCOMA, NEC                                       | 1                                       | 14.174     | 15                                         | 13.3278       | 1.0635(0.1398-8.0906)  |

| Description                                                        | No. of Positive Cases with Disease Code | Case Rate* | No. of Positive Controls with Disease Code | Control Rate* | Relative Risk (95%CI)  |
|--------------------------------------------------------------------|-----------------------------------------|------------|--------------------------------------------|---------------|------------------------|
| GLAUCOMA, NEOVASCULARIZATION                                       | 0                                       | 0          | 24                                         | 16.1897       | 0(0-Inf)               |
| GLAUCOMA, NOS--GLAU                                                | 48                                      | 460.7706   | 1016                                       | 455.4579      | 1.0117(0.7567-1.3525)  |
| GLAUCOMA, OPEN ANGLE                                               | 14                                      | 124.7571   | 248                                        | 101.8191      | 1.2253(0.7139-2.1031)  |
| GLAUCOMA, OPEN ANGLE, BORDERLINE                                   | 0                                       | 0          | 2                                          | 1.8991        | 0(0-Inf)               |
| GLAUCOMA, OPEN ANGLE, CHRONIC                                      | 7                                       | 80.4371    | 125                                        | 75.8381       | 1.0606(0.4944-2.2754)  |
| GLAUCOMA, OPEN ANGLE, PRIMARY                                      | 33                                      | 352.3269   | 617                                        | 330.7142      | 1.0654(0.7499-1.5136)  |
| GLAUCOMA, PHACOLYTIC                                               | 0                                       | 0          | 1                                          | 0.888         | 0(0-Inf)               |
| GLAUCOMA, PIGMENTARY                                               | 1                                       | 6.9979     | 32                                         | 8.1295        | 0.8608(0.1171-6.3262)  |
| GLAUCOMA, POSTINFECTIOUS                                           | 0                                       | 0          | 1                                          | 0.2354        | 0(0-Inf)               |
| GLAUCOMA, PSEUDOEXFOLIATION                                        | 10                                      | 111.0783   | 175                                        | 101.2323      | 1.0973(0.5791-2.0789)  |
| GLAUCOMA, SECONDARY                                                | 0                                       | 0          | 21                                         | 5.223         | 0(0-Inf)               |
| GLAUCOMA, SIMPLEX                                                  | 0                                       | 0          | 2                                          | 0.5458        | 0(0-Inf)               |
| GLAUCOMA, STEROID (CODE ALSO ADVERSE EFFECT STEROID, NEC)          | 0                                       | 0          | 6                                          | 1.9678        | 0(0-Inf)               |
| GLAUCOMA, SUBACUTE                                                 | 0                                       | 0          | 4                                          | 0.9158        | 0(0-Inf)               |
| GLAUCOMA, TRAUMATIC                                                | 0                                       | 0          | 3                                          | 0.8711        | 0(0-Inf)               |
| GLAUCOMA, WIDE ANGLE (CHRONIC)                                     | 0                                       | 0          | 6                                          | 1.4442        | 0(0-Inf)               |
| GLAUCOMA, WITH CHAMBER ANGLE ANOMALIES                             | 0                                       | 0          | 1                                          | 0.3526        | 0(0-Inf)               |
| GLAUCOMA, WITH INCREASED INTRAOCULAR PRESSURE                      | 0                                       | 0          | 5                                          | 3.2667        | 0(0-Inf)               |
| GLAUCOMA, WITH OCULAR INFLAMMATION                                 | 0                                       | 0          | 3                                          | 0.7064        | 0(0-Inf)               |
| GLIAL VEIL (OPTIC DISC) (CONGENITAL)                               | 0                                       | 0          | 1                                          | 0.234         | 0(0-Inf)               |
| GLIOBLASTOMA CODE ALSO NEOPLASM MALIGNANT BY SITE                  | 0                                       | 0          | 20                                         | 6.7462        | 0(0-Inf)               |
| GLIOMA, NOS, CODE ALSO NEOPLASM, MALIGNANT BY SITE                 | 0                                       | 0          | 17                                         | 6.9769        | 0(0-Inf)               |
| GLIOSARCOMA CODE ALSO NEOPLASM MALIGNANT BY SITE                   | 0                                       | 0          | 2                                          | 1.0781        | 0(0-Inf)               |
| GLIOSIS, NOS (BRAIN)                                               | 0                                       | 0          | 6                                          | 1.6817        | 0(0-Inf)               |
| GLIOSIS, RETINAL                                                   | 0                                       | 0          | 5                                          | 1.2832        | 0(0-Inf)               |
| GLOBUS HYSTERICUS                                                  | 12                                      | 89.279     | 275                                        | 63.7566       | 1.4003(0.7838-2.5016)  |
| GLOMANGIOMA (CODE ALSO HEMANGIOMA BY SITE)                         | 0                                       | 0          | 2                                          | 1.0783        | 0(0-Inf)               |
| GLOMERULONEPHRITIS, ACUTE, NOS                                     | 1                                       | 7.1523     | 5                                          | 1.4605        | 4.8972(0.56-42.8298)   |
| GLOMERULONEPHRITIS, ACUTE, POST-STREPTOCOCCAL                      | 0                                       | 0          | 2                                          | 0.4709        | 0(0-Inf)               |
| GLOMERULONEPHRITIS, ALLOGRAFT                                      | 0                                       | 0          | 2                                          | 0.5474        | 0(0-Inf)               |
| GLOMERULONEPHRITIS, CHRONIC, INTERSTITIAL                          | 0                                       | 0          | 14                                         | 5.5129        | 0(0-Inf)               |
| GLOMERULONEPHRITIS, CHRONIC, NOS                                   | 1                                       | 7.808      | 9                                          | 2.2376        | 3.4895(0.4356-27.9517) |
| GLOMERULONEPHRITIS, CRESCENTIC                                     | 0                                       | 0          | 5                                          | 1.4864        | 0(0-Inf)               |
| GLOMERULONEPHRITIS, DRUG-INDUCED, CODE ALSO EFFECT ADVERSE BY DRUG | 0                                       | 0          | 2                                          | 1.0782        | 0(0-Inf)               |
| GLOMERULONEPHRITIS, FOCAL                                          | 1                                       | 7.1151     | 12                                         | 3.0462        | 2.3357(0.3007-18.1429) |
| GLOMERULONEPHRITIS, FOCAL SCLEROSING                               | 1                                       | 7.312      | 5                                          | 1.5649        | 4.6724(0.5358-40.7425) |
| GLOMERULONEPHRITIS, FOCAL SCLEROSING, IDIOPATHIC                   | 0                                       | 0          | 1                                          | 0.2729        | 0(0-Inf)               |
| GLOMERULONEPHRITIS, HEREDITARY                                     | 0                                       | 0          | 1                                          | 0.2729        | 0(0-Inf)               |

| Description                                            | No. of Positive Cases with Disease Code | Case Rate* | No. of Positive Controls with Disease Code | Control Rate* | Relative Risk (95%CI)  |
|--------------------------------------------------------|-----------------------------------------|------------|--------------------------------------------|---------------|------------------------|
| GLOMERULONEPHRITIS, IMMUNE COMPLEX                     | 0                                       | 0          | 3                                          | 0.8709        | 0(0-Inf)               |
| GLOMERULONEPHRITIS, LATENT                             | 0                                       | 0          | 1                                          | 0.8274        | 0(0-Inf)               |
| GLOMERULONEPHRITIS, LUPUS                              | 0                                       | 0          | 1                                          | 0.234         | 0(0-Inf)               |
| GLOMERULONEPHRITIS, MEMBRANOPROLIFERATIVE              | 0                                       | 0          | 5                                          | 1.2804        | 0(0-Inf)               |
| GLOMERULONEPHRITIS, MEMBRANOUS                         | 0                                       | 0          | 10                                         | 2.7684        | 0(0-Inf)               |
| GLOMERULONEPHRITIS, MEMBRANOUS, CHRONIC                | 0                                       | 0          | 1                                          | 0.2729        | 0(0-Inf)               |
| GLOMERULONEPHRITIS, MEMBRANOUS, IDIOPATHIC             | 0                                       | 0          | 1                                          | 1.0363        | 0(0-Inf)               |
| GLOMERULONEPHRITIS, MESANGIOPROLIFERATIVE              | 0                                       | 0          | 2                                          | 0.5457        | 0(0-Inf)               |
| GLOMERULONEPHRITIS, NECROTIZING                        | 0                                       | 0          | 12                                         | 3.6673        | 0(0-Inf)               |
| GLOMERULONEPHRITIS, NOS                                | 1                                       | 7.2721     | 35                                         | 10.3756       | 0.7009(0.0956-5.1373)  |
| GLOMERULONEPHRITIS, OLD                                | 0                                       | 0          | 4                                          | 1.0354        | 0(0-Inf)               |
| GLOMERULONEPHRITIS, POST-INFECTIOUS                    | 0                                       | 0          | 3                                          | 0.8018        | 0(0-Inf)               |
| GLOMERULONEPHRITIS, PROGRESSIVE, RAPIDLY               | 0                                       | 0          | 1                                          | 0.4048        | 0(0-Inf)               |
| GLOMERULONEPHRITIS, PROLIFERATIVE                      | 1                                       | 7.4561     | 8                                          | 2.5295        | 2.9477(0.3634-23.908)  |
| GLOMERULONEPHRITIS, RADIATION                          | 0                                       | 0          | 1                                          | 0.2354        | 0(0-Inf)               |
| GLOMERULONEPHRITIS, TUBAL                              | 0                                       | 0          | 7                                          | 1.8973        | 0(0-Inf)               |
| GLOMERULOPATHY ALLOGRAFT (SEE ALSO GLOMERULONEPHRITIS) | 0                                       | 0          | 1                                          | 0.4751        | 0(0-Inf)               |
| GLOMERULOSCLEROSIS, DIABETIC                           | 0                                       | 0          | 2                                          | 0.5709        | 0(0-Inf)               |
| GLOMERULOSCLEROSIS, NOS, SEE ALSO SCLEROSIS            | 1                                       | 7.0439     | 19                                         | 5.5323        | 1.2732(0.1694-9.568)   |
| GLOSSALGIA                                             | 0                                       | 0          | 4                                          | 0.942         | 0(0-Inf)               |
| GLOSSITIS, AREATA MIGRANS                              | 0                                       | 0          | 1                                          | 1.0362        | 0(0-Inf)               |
| GLOSSITIS, BENIGN MIGRATORY                            | 0                                       | 0          | 2                                          | 0.9502        | 0(0-Inf)               |
| GLOSSITIS, MEDIAN RHOMBOID                             | 0                                       | 0          | 4                                          | 1.0306        | 0(0-Inf)               |
| GLOSSITIS, NOS                                         | 2                                       | 14.1919    | 59                                         | 15.965        | 0.8889(0.2163-3.6531)  |
| GLOSSODYNIA                                            | 0                                       | 0          | 45                                         | 11.2611       | 0(0-Inf)               |
| GLUE EARS                                              | 0                                       | 0          | 2                                          | 0.5709        | 0(0-Inf)               |
| GLYCOSURIA, NOS                                        | 2                                       | 14.7402    | 20                                         | 5.9766        | 2.4663(0.5706-10.6603) |
| GLYCOSURIA, RENAL                                      | 0                                       | 0          | 5                                          | 1.9948        | 0(0-Inf)               |
| GOITER, ADENOMATOUS, SEE ALSO GOITER, NODULAR          | 1                                       | 7.0737     | 32                                         | 7.2493        | 0.9758(0.1325-7.1835)  |
| GOITER, COLLOID, EUTHYROID                             | 0                                       | 0          | 3                                          | 1.5105        | 0(0-Inf)               |
| GOITER, COLLOID, NON-TOXIC                             | 0                                       | 0          | 1                                          | 0.2355        | 0(0-Inf)               |
| GOITER, COLLOID, NOS                                   | 4                                       | 32.8289    | 39                                         | 8.8975        | 3.6897(1.3072-10.4142) |
| GOITER, COLLOID, THYROID NODULE                        | 0                                       | 0          | 17                                         | 4.3892        | 0(0-Inf)               |
| GOITER, DIFFUSE, EUTHYROID                             | 0                                       | 0          | 4                                          | 1.4708        | 0(0-Inf)               |
| GOITER, DIFFUSE, NON-TOXIC                             | 0                                       | 0          | 1                                          | 0.2354        | 0(0-Inf)               |
| GOITER, DIFFUSE, NOS                                   | 0                                       | 0          | 6                                          | 1.3518        | 0(0-Inf)               |
| GOITER, ENLARGEMENT                                    | 0                                       | 0          | 2                                          | 0.8723        | 0(0-Inf)               |
| GOITER, EUTHYROID--GEU                                 | 3                                       | 23.3173    | 102                                        | 22.8612       | 1.0199(0.3226-3.2252)  |
| GOITER, EXOPHTHALMIC                                   | 0                                       | 0          | 3                                          | 0.6536        | 0(0-Inf)               |

| Description                                   | No. of Positive Cases with Disease Code | Case Rate* | No. of Positive Controls with Disease Code | Control Rate* | Relative Risk (95%CI)  |
|-----------------------------------------------|-----------------------------------------|------------|--------------------------------------------|---------------|------------------------|
| GOITER, MULTINODULAR, EUTHYROID--GMNE         | 2                                       | 13.9977    | 61                                         | 14.0009       | 0.9998(0.2434-4.1067)  |
| GOITER, MULTINODULAR, NON-TOXIC               | 0                                       | 0          | 21                                         | 5.8113        | 0(0-Inf)               |
| GOITER, MULTINODULAR, NOS--GMN                | 12                                      | 86.0867    | 297                                        | 77.7751       | 1.1069(0.6203-1.9752)  |
| GOITER, MULTINODULAR, TOXIC                   | 2                                       | 15.7752    | 33                                         | 11.2774       | 1.3988(0.3335-5.868)   |
| GOITER, MULTINODULAR, WITH HYPERTHYROIDISM    | 1                                       | 7.5118     | 15                                         | 4.6687        | 1.609(0.2103-12.3124)  |
| GOITER, MULTINODULAR, WITH THYROTOXICOSIS     | 0                                       | 0          | 1                                          | 0.4048        | 0(0-Inf)               |
| GOITER, MULTINODULAR, WITHOUT HYPERTHYROIDISM | 0                                       | 0          | 10                                         | 2.5405        | 0(0-Inf)               |
| GOITER, NODULAR, COLD                         | 0                                       | 0          | 4                                          | 0.9751        | 0(0-Inf)               |
| GOITER, NODULAR, EUTHYROID--GNEU              | 3                                       | 23.1282    | 42                                         | 9.4749        | 2.441(0.7512-7.9315)   |
| GOITER, NODULAR, NONFUNCTIONING               | 0                                       | 0          | 2                                          | 0.5838        | 0(0-Inf)               |
| GOITER, NODULAR, NON-TOXIC                    | 0                                       | 0          | 32                                         | 7.0548        | 0(0-Inf)               |
| GOITER, NODULAR, NOS--GN                      | 8                                       | 56.8353    | 134                                        | 31.1353       | 1.8254(0.8912-3.7392)  |
| GOITER, NODULAR, TOXIC                        | 0                                       | 0          | 13                                         | 3.8919        | 0(0-Inf)               |
| GOITER, NODULAR, WITH HYPERTHYROIDISM         | 0                                       | 0          | 4                                          | 1.0273        | 0(0-Inf)               |
| GOITER, NODULAR, WITH THYROTOXICOSIS          | 0                                       | 0          | 1                                          | 0.4048        | 0(0-Inf)               |
| GOITER, NODULAR, WITHOUT HYPERTHYROIDISM      | 1                                       | 13.784     | 19                                         | 5.7936        | 2.3792(0.3162-17.9041) |
| GOITER, NON-TOXIC                             | 1                                       | 7.5197     | 34                                         | 7.5524        | 0.9957(0.1355-7.3142)  |
| GOITER, NOS, WITH THYROTOXICOSIS              | 0                                       | 0          | 1                                          | 0.3526        | 0(0-Inf)               |
| GOITER, NOS--G                                | 11                                      | 78.1946    | 352                                        | 91.6479       | 0.8532(0.4674-1.5575)  |
| GOITER, SUBSTERNAL                            | 0                                       | 0          | 12                                         | 4.611         | 0(0-Inf)               |
| GOITER, SUBSTERNAL, MULTINODULAR              | 0                                       | 0          | 6                                          | 2.768         | 0(0-Inf)               |
| GOITER, SUBSTERNAL, NODULAR                   | 0                                       | 0          | 4                                          | 0.9522        | 0(0-Inf)               |
| GOITER, TOXIC, NOS                            | 0                                       | 0          | 1                                          | 0.8877        | 0(0-Inf)               |
| GOLDBLATT (SEE HYPERTENSION)                  | 0                                       | 0          | 1                                          | 0.3526        | 0(0-Inf)               |
| GOLF HOLE ORIFICE (VESICourethRAL)            | 0                                       | 0          | 1                                          | 0.2729        | 0(0-Inf)               |
| GOLFER'S ELBOW                                | 0                                       | 0          | 2                                          | 0.7053        | 0(0-Inf)               |
| GONARTHROSIS                                  | 28                                      | 235.0003   | 666                                        | 248.1955      | 0.9468(0.648-1.3834)   |
| GONORRHEA, GENITOURINARY SYSTEM, ACUTE        | 0                                       | 0          | 4                                          | 2.7451        | 0(0-Inf)               |
| GONORRHEA, NOS                                | 0                                       | 0          | 4                                          | 2.9077        | 0(0-Inf)               |
| GONORRHEA, RECTUM                             | 0                                       | 0          | 1                                          | 0.8272        | 0(0-Inf)               |
| GONORRHEA, SITE, NOS                          | 0                                       | 0          | 1                                          | 0.4751        | 0(0-Inf)               |
| GONORRHEA, URETHRA, ACUTE                     | 0                                       | 0          | 8                                          | 3.1828        | 0(0-Inf)               |
| GOOD GENERAL HEALTH (MAINTENANCE)             | 18                                      | 135.4888   | 673                                        | 209.1552      | 0.6478(0.4052-1.0355)  |
| GOUT, ACUTE                                   | 9                                       | 78.7864    | 191                                        | 78.4772       | 1.0039(0.5136-1.9623)  |
| GOUT, CHRONIC                                 | 0                                       | 0          | 9                                          | 2.5272        | 0(0-Inf)               |
| GOUT, NOS                                     | 37                                      | 331.0381   | 860                                        | 356.9183      | 0.9275(0.6669-1.29)    |
| GOUT, TOPHI                                   | 2                                       | 27.62      | 48                                         | 37.5261       | 0.736(0.1785-3.0353)   |
| GRANULATION, ORAL MUCOSA                      | 0                                       | 0          | 3                                          | 1.902         | 0(0-Inf)               |
| GRANULATION, SKIN                             | 3                                       | 21.4156    | 85                                         | 24.1367       | 0.8873(0.2797-2.8141)  |
| GRANULOCYTOPENIA                              | 0                                       | 0          | 3                                          | 1.2104        | 0(0-Inf)               |

| Description                                             | No. of Positive Cases with Disease Code | Case Rate* | No. of Positive Controls with Disease Code | Control Rate* | Relative Risk (95%CI)    |
|---------------------------------------------------------|-----------------------------------------|------------|--------------------------------------------|---------------|--------------------------|
| GRANULOCYTOSIS                                          | 0                                       | 0          | 1                                          | 0.3526        | 0(0-Inf)                 |
| GRANULOMA, ABDOMINAL (INTERNAL)                         | 0                                       | 0          | 1                                          | 0.2728        | 0(0-Inf)                 |
| GRANULOMA, ANNULARE                                     | 4                                       | 29.074     | 62                                         | 14.2365       | 2.0422(0.7389-5.6445)    |
| GRANULOMA, ANNULARE, SUBCUTANEOUS                       | 0                                       | 0          | 2                                          | 0.6309        | 0(0-Inf)                 |
| GRANULOMA, APICAL, NEC (DENTAL#)                        | 0                                       | 0          | 7                                          | 2.7308        | 0(0-Inf)                 |
| GRANULOMA, BLADDER                                      | 0                                       | 0          | 5                                          | 4.6223        | 0(0-Inf)                 |
| GRANULOMA, BONE MARROW                                  | 0                                       | 0          | 1                                          | 0.2729        | 0(0-Inf)                 |
| GRANULOMA, BONE, NEC                                    | 0                                       | 0          | 1                                          | 0.234         | 0(0-Inf)                 |
| GRANULOMA, BRAIN, NOS                                   | 0                                       | 0          | 1                                          | 0.234         | 0(0-Inf)                 |
| GRANULOMA, BRONCHUS                                     | 1                                       | 9.1438     | 2                                          | 0.5417        | 16.8797(1.4703-193.789)  |
| GRANULOMA, CHOLESTEROL                                  | 0                                       | 0          | 2                                          | 0.6309        | 0(0-Inf)                 |
| GRANULOMA, COLON                                        | 0                                       | 0          | 5                                          | 1.7686        | 0(0-Inf)                 |
| GRANULOMA, CONJUNCTIVA                                  | 0                                       | 0          | 3                                          | 0.8873        | 0(0-Inf)                 |
| GRANULOMA, DENTAL, NEC                                  | 1                                       | 7.0102     | 20                                         | 4.8373        | 1.4492(0.1929-10.8854)   |
| GRANULOMA, EAR (AURAL)                                  | 0                                       | 0          | 4                                          | 1.3629        | 0(0-Inf)                 |
| GRANULOMA, EAR (MIDDLE)                                 | 0                                       | 0          | 3                                          | 0.7884        | 0(0-Inf)                 |
| GRANULOMA, EXUBERANT                                    | 0                                       | 0          | 1                                          | 0.4048        | 0(0-Inf)                 |
| GRANULOMA, EYE                                          | 0                                       | 0          | 5                                          | 1.3368        | 0(0-Inf)                 |
| GRANULOMA, EYELID, NEC                                  | 0                                       | 0          | 19                                         | 4.5537        | 0(0-Inf)                 |
| GRANULOMA, FACE, LETHAL, MIDLINE                        | 0                                       | 0          | 1                                          | 0.2729        | 0(0-Inf)                 |
| GRANULOMA, FACIAL (FACE)                                | 0                                       | 0          | 1                                          | 0.398         | 0(0-Inf)                 |
| GRANULOMA, FOREIGN BODY                                 | 0                                       | 0          | 14                                         | 3.8162        | 0(0-Inf)                 |
| GRANULOMA, FOREIGN BODY, SKIN                           | 7                                       | 48.9745    | 156                                        | 38.8035       | 1.2621(0.5903-2.6984)    |
| GRANULOMA, GENITAL FEMALE                               | 0                                       | 0          | 6                                          | 1.3073        | 0(0-Inf)                 |
| GRANULOMA, GUM (FISSURATUM)                             | 0                                       | 0          | 1                                          | 0.2729        | 0(0-Inf)                 |
| GRANULOMA, HISTOPLASMA                                  | 0                                       | 0          | 4                                          | 1.1122        | 0(0-Inf)                 |
| GRANULOMA, INJECTION, CODE ALSO EFFECT, ADVERSE BY DRUG | 0                                       | 0          | 4                                          | 1.1114        | 0(0-Inf)                 |
| GRANULOMA, INTESTINE                                    | 2                                       | 14.9456    | 17                                         | 5.2671        | 2.8376(0.6484-12.4176)   |
| GRANULOMA, INTRATHORACIC (CHEST WALL) (MASTECTOMY SITE) | 1                                       | 11.7106    | 0                                          | 0             | 8837677299.9799(0-Inf)   |
| GRANULOMA, JAW                                          | 1                                       | 9.2792     | 3                                          | 0.7853        | 11.8164(1.1866-117.6708) |
| GRANULOMA, KIDNEY, NOS                                  | 0                                       | 0          | 2                                          | 0.6309        | 0(0-Inf)                 |
| GRANULOMA, LACRIMAL SAC, NEC                            | 0                                       | 0          | 1                                          | 0.234         | 0(0-Inf)                 |
| GRANULOMA, LARYNX                                       | 0                                       | 0          | 6                                          | 1.5937        | 0(0-Inf)                 |
| GRANULOMA, LIVER, CALCIFIED                             | 0                                       | 0          | 3                                          | 0.9165        | 0(0-Inf)                 |
| GRANULOMA, LIVER, NOS                                   | 0                                       | 0          | 3                                          | 0.7022        | 0(0-Inf)                 |
| GRANULOMA, LOWER EXTREMITY, NEC                         | 0                                       | 0          | 6                                          | 2.0978        | 0(0-Inf)                 |
| GRANULOMA, LUNG, CALCIFIED                              | 1                                       | 7.0873     | 56                                         | 15.5251       | 0.4565(0.063-3.3069)     |
| GRANULOMA, LUNG, CASEOUS                                | 0                                       | 0          | 18                                         | 4.3824        | 0(0-Inf)                 |
| GRANULOMA, LUNG, NON-CASEOUS                            | 0                                       | 0          | 13                                         | 3.1054        | 0(0-Inf)                 |

| Description                                                       | No. of Positive Cases with Disease Code | Case Rate* | No. of Positive Controls with Disease Code | Control Rate* | Relative Risk (95%CI)   |
|-------------------------------------------------------------------|-----------------------------------------|------------|--------------------------------------------|---------------|-------------------------|
| GRANULOMA, LUNG, NOS                                              | 4                                       | 28.0302    | 104                                        | 27.9073       | 1.0044(0.3689-2.7344)   |
| GRANULOMA, LYMPH NODE, CASEATING                                  | 1                                       | 7.0027     | 3                                          | 0.8044        | 8.7056(0.8745-86.6613)  |
| GRANULOMA, LYMPH NODE, NOS                                        | 3                                       | 21.3616    | 33                                         | 9.0818        | 2.3521(0.7159-7.7282)   |
| GRANULOMA, LYMPHOID, SEE ALSO LYMPHOGRANULOMA                     | 0                                       | 0          | 1                                          | 0.4048        | 0(0-Inf)                |
| GRANULOMA, MAJOCCHI'S                                             | 0                                       | 0          | 4                                          | 1.2083        | 0(0-Inf)                |
| GRANULOMA, MANDIBLE                                               | 0                                       | 0          | 2                                          | 0.4854        | 0(0-Inf)                |
| GRANULOMA, MEDIASTINUM                                            | 0                                       | 0          | 3                                          | 0.7175        | 0(0-Inf)                |
| GRANULOMA, MOUTH, PYOGENIC                                        | 0                                       | 0          | 6                                          | 1.5882        | 0(0-Inf)                |
| GRANULOMA, NASAL (SINUS)                                          | 1                                       | 7.2365     | 2                                          | 0.5747        | 12.591(1.0894-145.5247) |
| GRANULOMA, NEC, POSTOPERATIVE, STITCH                             | 4                                       | 28.7595    | 55                                         | 13.0388       | 2.2057(0.7948-6.1214)   |
| GRANULOMA, NOSE, NOS                                              | 0                                       | 0          | 6                                          | 1.5022        | 0(0-Inf)                |
| GRANULOMA, OPERATION WOUND                                        | 0                                       | 0          | 25                                         | 7.5232        | 0(0-Inf)                |
| GRANULOMA, ORAL MUCOSA                                            | 1                                       | 11.2138    | 0                                          | 0             | 7457373180.1553(0-Inf)  |
| GRANULOMA, PERITONEUM                                             | 0                                       | 0          | 1                                          | 1.9076        | 0(0-Inf)                |
| GRANULOMA, PLEURA                                                 | 1                                       | 14.1126    | 2                                          | 1.5957        | 8.844(0.7862-99.4864)   |
| GRANULOMA, PROSTATE                                               | 0                                       | 0          | 3                                          | 1.1479        | 0(0-Inf)                |
| GRANULOMA, RECTUM                                                 | 0                                       | 0          | 9                                          | 2.7239        | 0(0-Inf)                |
| GRANULOMA, SALIVARY GLAND                                         | 0                                       | 0          | 1                                          | 0.4049        | 0(0-Inf)                |
| GRANULOMA, SARCOID, SEE ALSO SARCOIDOSIS/SARCOID                  | 0                                       | 0          | 2                                          | 0.5069        | 0(0-Inf)                |
| GRANULOMA, SILICONE/POLYURETHANE, CODE ALSO SITE STATED           | 0                                       | 0          | 1                                          | 0.234         | 0(0-Inf)                |
| GRANULOMA, SINUS                                                  | 0                                       | 0          | 1                                          | 0.3526        | 0(0-Inf)                |
| GRANULOMA, SKIN, CALCIFIED                                        | 0                                       | 0          | 3                                          | 0.7065        | 0(0-Inf)                |
| GRANULOMA, SKIN, CASEOUS                                          | 0                                       | 0          | 2                                          | 0.4709        | 0(0-Inf)                |
| GRANULOMA, SKIN, NEC                                              | 1                                       | 12.7127    | 10                                         | 6.9587        | 1.8269(0.2321-14.3818)  |
| GRANULOMA, SKIN, NONCASEATING                                     | 0                                       | 0          | 3                                          | 0.7175        | 0(0-Inf)                |
| GRANULOMA, SKIN, NOS                                              | 2                                       | 13.8767    | 98                                         | 25.0217       | 0.5546(0.1365-2.2536)   |
| GRANULOMA, SKIN, PYOGENIC                                         | 5                                       | 35.1335    | 137                                        | 33.3537       | 1.0534(0.4304-2.578)    |
| GRANULOMA, SPERM                                                  | 0                                       | 0          | 4                                          | 1.2082        | 0(0-Inf)                |
| GRANULOMA, SPERMATIC CORD                                         | 0                                       | 0          | 6                                          | 3.2365        | 0(0-Inf)                |
| GRANULOMA, SPLEEN                                                 | 0                                       | 0          | 5                                          | 1.2694        | 0(0-Inf)                |
| GRANULOMA, STOMACH                                                | 0                                       | 0          | 3                                          | 1.1478        | 0(0-Inf)                |
| GRANULOMA, SUBCUTANEOUS, NEC                                      | 0                                       | 0          | 2                                          | 2.9825        | 0(0-Inf)                |
| GRANULOMA, TONGUE                                                 | 0                                       | 0          | 1                                          | 0.2729        | 0(0-Inf)                |
| GRANULOMA, TRACHEA                                                | 0                                       | 0          | 3                                          | 0.7175        | 0(0-Inf)                |
| GRANULOMA, TUBERCULOUS (PULMONARY#) SEE ALSO TUBERCULOSIS BY SITE | 1                                       | 11.7106    | 0                                          | 0             | 8837677299.9799(0-Inf)  |
| GRANULOMA, TYMPANUM                                               | 0                                       | 0          | 1                                          | 0.4048        | 0(0-Inf)                |
| GRANULOMA, UPPER EXTREMITY, NEC                                   | 0                                       | 0          | 7                                          | 2.4585        | 0(0-Inf)                |
| GRANULOMA, URETHRA                                                | 0                                       | 0          | 1                                          | 0.4048        | 0(0-Inf)                |



| Description                                        | No. of Positive Cases with Disease Code | Case Rate* | No. of Positive Controls with Disease Code | Control Rate* | Relative Risk (95%CI)  |
|----------------------------------------------------|-----------------------------------------|------------|--------------------------------------------|---------------|------------------------|
| GRANULOMA, VAGINA OR VULVA                         | 2                                       | 30.0081    | 37                                         | 16.0177       | 1.8734(0.4483-7.8291)  |
| GRANULOMA, VOCAL CORD                              | 1                                       | 6.9937     | 25                                         | 6.3561        | 1.1003(0.1483-8.164)   |
| GRANULOMATOSIS, LYMPHOMATOID                       | 0                                       | 0          | 1                                          | 0.4049        | 0(0-Inf)               |
| GRANULOMATOSIS, NEC (SKIN#)                        | 2                                       | 15.0823    | 5                                          | 1.5967        | 9.4462(1.7876-49.9155) |
| GRANULOMATOSIS, WEGENER'S                          | 1                                       | 7.3214     | 12                                         | 3.5828        | 2.0435(0.2627-15.8978) |
| GUSTATORY SWEATING                                 | 0                                       | 0          | 1                                          | 0.2354        | 0(0-Inf)               |
| GUTTATA CORNEA                                     | 4                                       | 31.9485    | 123                                        | 42.2647       | 0.7559(0.2786-2.0512)  |
| GYNECOMASTIA                                       | 8                                       | 138.7099   | 156                                        | 128.6455      | 1.0782(0.529-2.1978)   |
| HAIR FACIAL (EXCESSIVE)                            | 0                                       | 0          | 21                                         | 10.4271       | 0(0-Inf)               |
| HAIRY BLACK TONGUE                                 | 0                                       | 0          | 6                                          | 1.5045        | 0(0-Inf)               |
| HAIRY TONGUE                                       | 0                                       | 0          | 8                                          | 3.5707        | 0(0-Inf)               |
| HALITOSIS                                          | 0                                       | 0          | 29                                         | 9.0032        | 0(0-Inf)               |
| HALLUCINATION, DRUG-INDUCED                        | 1                                       | 8.2275     | 10                                         | 3.6927        | 2.228(0.2814-17.6436)  |
| HALLUCINATION, NOS                                 | 8                                       | 115.7469   | 141                                        | 120.8051      | 0.9581(0.4692-1.9564)  |
| HALLUCINATION, VISUAL                              | 3                                       | 38.9959    | 56                                         | 42.2683       | 0.9226(0.288-2.9554)   |
| HALLUX, LIMITUS                                    | 1                                       | 7.2016     | 17                                         | 4.0935        | 1.7593(0.232-13.3401)  |
| HALLUX, RIGIDUS                                    | 4                                       | 28.2028    | 188                                        | 45.4585       | 0.6204(0.2301-1.6731)  |
| HALLUX, VALGUS                                     | 26                                      | 189.2018   | 642                                        | 151.5029      | 1.2488(0.8425-1.8512)  |
| HALLUX, VARUS                                      | 0                                       | 0          | 4                                          | 0.8641        | 0(0-Inf)               |
| HAMARTOMA, NOS, CODE ALSO NEOPLASM, BENIGN BY SITE | 0                                       | 0          | 23                                         | 6.5458        | 0(0-Inf)               |
| HAMARTOMA, RETINAL PIGMENT                         | 0                                       | 0          | 1                                          | 0.2354        | 0(0-Inf)               |
| HAMMER TOE, NOS                                    | 25                                      | 197.0733   | 774                                        | 259.13        | 0.7605(0.5102-1.1337)  |
| HANGNAIL                                           | 0                                       | 0          | 4                                          | 1.1817        | 0(0-Inf)               |
| HASHITOXICOSIS                                     | 0                                       | 0          | 1                                          | 0.2354        | 0(0-Inf)               |
| HAY FEVER, NOS                                     | 4                                       | 40.754     | 133                                        | 35.9477       | 1.1337(0.4183-3.0725)  |
| HAY FEVER, WITH ASTHMA                             | 0                                       | 0          | 16                                         | 4.3271        | 0(0-Inf)               |
| HAZY CAPSULE (AFTER CATARACT)                      | 13                                      | 156.9739   | 270                                        | 179.0441      | 0.8767(0.5019-1.5316)  |
| HEAD, TILT                                         | 0                                       | 0          | 1                                          | 0.8528        | 0(0-Inf)               |
| HEADACHE, ALLERGIC                                 | 0                                       | 0          | 4                                          | 0.9362        | 0(0-Inf)               |
| HEADACHE, CATAMENIAL (MENSTRUAL)                   | 0                                       | 0          | 3                                          | 0.7021        | 0(0-Inf)               |
| HEADACHE, CLUSTER                                  | 1                                       | 9.956      | 56                                         | 16.1991       | 0.6146(0.0849-4.4509)  |
| HEADACHE, HISTAMINE                                | 0                                       | 0          | 3                                          | 0.7461        | 0(0-Inf)               |
| HEADACHE, HYPNIC                                   | 0                                       | 0          | 2                                          | 0.5709        | 0(0-Inf)               |
| HEADACHE, ICE PICK                                 | 0                                       | 0          | 20                                         | 5.415         | 0(0-Inf)               |
| HEADACHE, LUMBAR PUNCTURE                          | 0                                       | 0          | 3                                          | 0.8034        | 0(0-Inf)               |
| HEADACHE, MIGRAINE                                 | 0                                       | 0          | 1                                          | 0.234         | 0(0-Inf)               |
| HEADACHE, MIGRAINE--HDKM                           | 24                                      | 229.7147   | 828                                        | 208.7445      | 1.1005(0.7326-1.653)   |
| HEADACHE, MUSCLE-CONTRACTION                       | 5                                       | 35.5198    | 162                                        | 38.2437       | 0.9288(0.3805-2.267)   |
| HEADACHE, NOS--HDK                                 | 91                                      | 683.7629   | 2642                                       | 743.3572      | 0.9198(0.7459-1.1343)  |
| HEADACHE, POST SPINAL PUNCTURE                     | 0                                       | 0          | 22                                         | 5.5409        | 0(0-Inf)               |

| Description                                                | No. of Positive Cases with Disease Code | Case Rate* | No. of Positive Controls with Disease Code | Control Rate* | Relative Risk (95%CI)  |
|------------------------------------------------------------|-----------------------------------------|------------|--------------------------------------------|---------------|------------------------|
| HEADACHE, POST TRAUMA                                      | 5                                       | 34.912     | 94                                         | 23.2395       | 1.5023(0.6088-3.707)   |
| HEADACHE, PREMENSTRUAL                                     | 0                                       | 0          | 6                                          | 2.1391        | 0(0-Inf)               |
| HEADACHE, PSYCHOGENIC                                      | 0                                       | 0          | 11                                         | 4.6107        | 0(0-Inf)               |
| HEADACHE, REBOUND                                          | 1                                       | 6.9616     | 11                                         | 2.7968        | 2.4892(0.3164-19.5802) |
| HEADACHE, SINUS                                            | 2                                       | 13.9344    | 29                                         | 7.4926        | 1.8598(0.4404-7.854)   |
| HEADACHE, SPINAL                                           | 0                                       | 0          | 2                                          | 0.5909        | 0(0-Inf)               |
| HEADACHE, STRESS                                           | 0                                       | 0          | 13                                         | 3.3466        | 0(0-Inf)               |
| HEADACHE, TENSION--HDKT                                    | 56                                      | 575.595    | 1563                                       | 426.6568      | 1.3491(1.0326-1.7625)  |
| HEADACHE, VASCULAR, MIGRAINE TYPE                          | 0                                       | 0          | 1                                          | 0.234         | 0(0-Inf)               |
| HEADACHE, VASCULAR--HDKV                                   | 25                                      | 278.0244   | 655                                        | 180.7732      | 1.538(1.0303-2.2957)   |
| HEADACHE, VASODILATING                                     | 1                                       | 12.5209    | 17                                         | 5.1772        | 2.4185(0.3191-18.3275) |
| HEALTH EDUCATION                                           | 5                                       | 37.4778    | 164                                        | 50.801        | 0.7377(0.3024-1.7999)  |
| HEARING AID CHECK                                          | 2                                       | 25.9987    | 63                                         | 46.0084       | 0.5651(0.138-2.3139)   |
| HEART CONSCIOUSNESS                                        | 0                                       | 0          | 5                                          | 1.5562        | 0(0-Inf)               |
| HEARTBURN                                                  | 14                                      | 103.9235   | 526                                        | 159.6954      | 0.6508(0.3823-1.1077)  |
| HEAVY MENSES                                               | 1                                       | 35.4676    | 24                                         | 16.0927       | 2.204(0.2969-16.3587)  |
| HELICOBACTER PYLORI CODE ALSO BY SITE IF STATED            | 15                                      | 137.121    | 353                                        | 153.6861      | 0.8922(0.5315-1.4978)  |
| HELIODERMATITIS                                            | 0                                       | 0          | 1                                          | 0.234         | 0(0-Inf)               |
| HELOMA                                                     | 3                                       | 21.1147    | 34                                         | 7.98          | 2.6459(0.806-8.6859)   |
| HEMANGIOBLASTOMA, CODE ALSO NEOPLASM MALIGNANT BY SITE     | 0                                       | 0          | 4                                          | 1.3087        | 0(0-Inf)               |
| HEMANGIOENDOTHELIOMA, NOS                                  | 0                                       | 0          | 1                                          | 0.8879        | 0(0-Inf)               |
| HEMANGIOMA, BONE                                           | 0                                       | 0          | 3                                          | 0.802         | 0(0-Inf)               |
| HEMANGIOMA, BRAIN                                          | 0                                       | 0          | 1                                          | 0.234         | 0(0-Inf)               |
| HEMANGIOMA, BRAIN, CAVERNOUS                               | 0                                       | 0          | 5                                          | 1.271         | 0(0-Inf)               |
| HEMANGIOMA, CAVERNOUS, LIVER                               | 2                                       | 14.0118    | 28                                         | 6.7855        | 2.065(0.4881-8.7351)   |
| HEMANGIOMA, CAVERNOUS, NEC, CODE ALSO BY SITE STATED       | 5                                       | 38.6138    | 62                                         | 14.3663       | 2.6878(1.0741-6.7261)  |
| HEMANGIOMA, CHOROID                                        | 0                                       | 0          | 2                                          | 1.1973        | 0(0-Inf)               |
| HEMANGIOMA, HEART                                          | 0                                       | 0          | 1                                          | 0.2354        | 0(0-Inf)               |
| HEMANGIOMA, IRIS                                           | 0                                       | 0          | 1                                          | 0.234         | 0(0-Inf)               |
| HEMANGIOMA, NEC, CODE ALSO NEOPLASM BENIGN BY SITE         | 4                                       | 28.1334    | 137                                        | 36.8281       | 0.7639(0.282-2.0694)   |
| HEMANGIOMA, NEC, HEAD                                      | 3                                       | 20.9659    | 71                                         | 17.3091       | 1.2113(0.38-3.8614)    |
| HEMANGIOMA, NEC, LOWER EXTREMITY                           | 0                                       | 0          | 17                                         | 3.9857        | 0(0-Inf)               |
| HEMANGIOMA, NEC, NECK                                      | 0                                       | 0          | 7                                          | 1.6274        | 0(0-Inf)               |
| HEMANGIOMA, NEC, TRUNK                                     | 0                                       | 0          | 30                                         | 7.0281        | 0(0-Inf)               |
| HEMANGIOMA, NEC, UPPER EXTREMITY                           | 0                                       | 0          | 27                                         | 6.2871        | 0(0-Inf)               |
| HEMANGIOMA, PORT WINE, CODE ALSO HEMANGIOMA (SKIN) BY SITE | 0                                       | 0          | 15                                         | 3.5426        | 0(0-Inf)               |
| HEMANGIOMA, RETINA                                         | 0                                       | 0          | 3                                          | 0.7021        | 0(0-Inf)               |
| HEMANGIOMA, SCLEROSING, SEE ALSO DERMATOFIBROMA            | 0                                       | 0          | 4                                          | 1.2619        | 0(0-Inf)               |

| Description                                                             | No. of Positive Cases with Disease Code | Case Rate* | No. of Positive Controls with Disease Code | Control Rate* | Relative Risk (95%CI)  |
|-------------------------------------------------------------------------|-----------------------------------------|------------|--------------------------------------------|---------------|------------------------|
| HEMANGIOMA, SKIN, HEAD                                                  | 6                                       | 42.1991    | 119                                        | 32.1221       | 1.3137(0.5769-2.9917)  |
| HEMANGIOMA, SKIN, LOWER EXTREMITY                                       | 2                                       | 14.7123    | 47                                         | 10.873        | 1.3531(0.327-5.5991)   |
| HEMANGIOMA, SKIN, NECK                                                  | 2                                       | 14.0644    | 24                                         | 5.8525        | 2.4032(0.5631-10.2567) |
| HEMANGIOMA, SKIN, NOS                                                   | 5                                       | 35.7181    | 233                                        | 65.7981       | 0.5428(0.2235-1.3184)  |
| HEMANGIOMA, SKIN, TRUNK                                                 | 1                                       | 6.9396     | 97                                         | 24.169        | 0.2871(0.04-2.0626)    |
| HEMANGIOMA, SKIN, UPPER EXTREMITY                                       | 1                                       | 6.9409     | 46                                         | 11.6546       | 0.5956(0.0819-4.3321)  |
| HEMANGIOMA, SPINAL CORD (CAVERNOUS)                                     | 0                                       | 0          | 2                                          | 2.9793        | 0(0-Inf)               |
| HEMANGIOMA, STRAWBERRY, SEE ALSO ANGIOMA                                | 0                                       | 0          | 1                                          | 0.234         | 0(0-Inf)               |
| HEMANGIOMATOSIS, NOS, SEE ALSO HEMANGIOMA                               | 0                                       | 0          | 1                                          | 0.4751        | 0(0-Inf)               |
| HEMANGIOPERICYTOMA, BENIGN, CODE ALSO HEMANGIOMA BY SITE                | 0                                       | 0          | 1                                          | 0.8277        | 0(0-Inf)               |
| HEMANGIOPERICYTOMA, NOS, CODE ALSO NEOPLASM MALIGNANT BY SITE           | 0                                       | 0          | 1                                          | 0.8892        | 0(0-Inf)               |
| HEMARTHROSIS, LOWER EXTREMITY                                           | 2                                       | 15.6973    | 54                                         | 18.6114       | 0.8434(0.205-3.4707)   |
| HEMARTHROSIS, NOS                                                       | 3                                       | 30.9663    | 11                                         | 5.7512        | 5.3843(1.4824-19.5564) |
| HEMARTHROSIS, TRAUMATIC, CODE ALSO INJURY, JOINT BY SITE                | 0                                       | 0          | 25                                         | 5.7036        | 0(0-Inf)               |
| HEMARTHROSIS, UPPER EXTREMITY                                           | 0                                       | 0          | 10                                         | 4.0477        | 0(0-Inf)               |
| HEMATEMESIS, NOS                                                        | 1                                       | 10.0906    | 56                                         | 28.4065       | 0.3552(0.0491-2.5713)  |
| HEMATEMESIS, WITH ULCER, PEPTIC                                         | 0                                       | 0          | 1                                          | 0.3526        | 0(0-Inf)               |
| HEMATEMESIS, WITH ULCER, STOMACH                                        | 0                                       | 0          | 2                                          | 0.4682        | 0(0-Inf)               |
| HEMATOCHEZIA                                                            | 16                                      | 122.8032   | 348                                        | 112.957       | 1.0872(0.6576-1.7974)  |
| HEMATOMA, ALVEOLAR PROCESS                                              | 0                                       | 0          | 1                                          | 0.2729        | 0(0-Inf)               |
| HEMATOMA, ANUS, TRAUMATIC                                               | 0                                       | 0          | 19                                         | 7.4605        | 0(0-Inf)               |
| HEMATOMA, ARTERIAL, LOWER EXTREMITY, CODE ALSO INJURY, VASCULAR BY SITE | 0                                       | 0          | 5                                          | 2.0356        | 0(0-Inf)               |
| HEMATOMA, ARTERIAL, THORAX, CODE ALSO INJURY, VASCULAR BY SITE          | 0                                       | 0          | 1                                          | 0.8878        | 0(0-Inf)               |
| HEMATOMA, BRAIN, LATE EFFECT, TRAUMATIC                                 | 0                                       | 0          | 2                                          | 1.1614        | 0(0-Inf)               |
| HEMATOMA, BRAIN, TRAUMATIC                                              | 1                                       | 16.625     | 5                                          | 5.257         | 3.1624(0.3655-27.3632) |
| HEMATOMA, BREAST                                                        | 0                                       | 0          | 19                                         | 11.765        | 0(0-Inf)               |
| HEMATOMA, CHEEK                                                         | 0                                       | 0          | 10                                         | 2.5398        | 0(0-Inf)               |
| HEMATOMA, CORPUS LUTEUM                                                 | 0                                       | 0          | 1                                          | 0.398         | 0(0-Inf)               |
| HEMATOMA, EAR                                                           | 1                                       | 8.8015     | 14                                         | 5.8183        | 1.5127(0.1974-11.5939) |
| HEMATOMA, EPIDURAL, ACUTE                                               | 0                                       | 0          | 1                                          | 0.4049        | 0(0-Inf)               |
| HEMATOMA, EPIDURAL, NOS                                                 | 1                                       | 6.9247     | 10                                         | 2.5467        | 2.7191(0.3433-21.5373) |
| HEMATOMA, EPIDURAL, TRAUMATIC                                           | 0                                       | 0          | 2                                          | 0.5708        | 0(0-Inf)               |
| HEMATOMA, EYE                                                           | 0                                       | 0          | 5                                          | 1.3368        | 0(0-Inf)               |
| HEMATOMA, EYELID                                                        | 0                                       | 0          | 9                                          | 2.2928        | 0(0-Inf)               |
| HEMATOMA, FACE                                                          | 1                                       | 8.9195     | 31                                         | 13.074        | 0.6822(0.0927-5.0192)  |
| HEMATOMA, HEAD                                                          | 4                                       | 31.5889    | 60                                         | 20.3434       | 1.5528(0.5616-4.2935)  |

| Description                                                                              | No. of Positive Cases with Disease Code | Case Rate* | No. of Positive Controls with Disease Code | Control Rate* | Relative Risk (95%CI)    |
|------------------------------------------------------------------------------------------|-----------------------------------------|------------|--------------------------------------------|---------------|--------------------------|
| HEMATOMA, INTERNAL ORGAN, CODE ALSO INJURY, INTERNAL BY SITE                             | 0                                       | 0          | 7                                          | 2.0183        | 0(0-Inf)                 |
| HEMATOMA, LINGUAL                                                                        | 0                                       | 0          | 2                                          | 0.6775        | 0(0-Inf)                 |
| HEMATOMA, NASAL SEPTUM                                                                   | 0                                       | 0          | 3                                          | 1.54          | 0(0-Inf)                 |
| HEMATOMA, NEC, SEE ALSO CONTUSION                                                        | 3                                       | 22.0014    | 31                                         | 9.1974        | 2.3921(0.7255-7.887)     |
| HEMATOMA, NECK                                                                           | 0                                       | 0          | 3                                          | 2.0938        | 0(0-Inf)                 |
| HEMATOMA, NOS (ASSUME TRAUMATIC UNLESS O/W STATED)(SEE ALSO HEMORRHAGE FOR NONTRAUMATIC) | 4                                       | 42.2192    | 167                                        | 90.8253       | 0.4648(0.1722-1.2548)    |
| HEMATOMA, ORBIT, TRAUMATIC                                                               | 0                                       | 0          | 11                                         | 2.9941        | 0(0-Inf)                 |
| HEMATOMA, OVARY                                                                          | 0                                       | 0          | 1                                          | 0.398         | 0(0-Inf)                 |
| HEMATOMA, PALATE                                                                         | 0                                       | 0          | 2                                          | 0.5069        | 0(0-Inf)                 |
| HEMATOMA, PELVIC, FEMALE                                                                 | 1                                       | 12.5028    | 9                                          | 6.9445        | 1.8004(0.2261-14.3344)   |
| HEMATOMA, PELVIC, MALE                                                                   | 0                                       | 0          | 6                                          | 3.806         | 0(0-Inf)                 |
| HEMATOMA, PENIS                                                                          | 0                                       | 0          | 1                                          | 0.3526        | 0(0-Inf)                 |
| HEMATOMA, PERIANAL, NONTRAUMATIC                                                         | 0                                       | 0          | 32                                         | 9.7063        | 0(0-Inf)                 |
| HEMATOMA, PERIANAL, TRAUMATIC                                                            | 0                                       | 0          | 1                                          | 0.8877        | 0(0-Inf)                 |
| HEMATOMA, POSTOPERATIVE                                                                  | 7                                       | 57.4454    | 273                                        | 100.1154      | 0.5738(0.2706-1.2166)    |
| HEMATOMA, PULMONARY                                                                      | 0                                       | 0          | 2                                          | 1.1972        | 0(0-Inf)                 |
| HEMATOMA, RECTUM, NONTRAUMATIC                                                           | 0                                       | 0          | 3                                          | 0.9774        | 0(0-Inf)                 |
| HEMATOMA, RECTUM, TRAUMATIC                                                              | 0                                       | 0          | 1                                          | 1.0362        | 0(0-Inf)                 |
| HEMATOMA, RETROPERITONEAL                                                                | 1                                       | 10.0506    | 20                                         | 10.073        | 0.9978(0.1332-7.4742)    |
| HEMATOMA, SACRAL REGION                                                                  | 1                                       | 7.6265     | 2                                          | 0.4994        | 15.2715(1.3285-175.5449) |
| HEMATOMA, SCALP                                                                          | 2                                       | 15.0828    | 32                                         | 10.011        | 1.5066(0.3586-6.3291)    |
| HEMATOMA, SCROTUM                                                                        | 0                                       | 0          | 6                                          | 1.8986        | 0(0-Inf)                 |
| HEMATOMA, SPINAL CORD, NONTRAUMATIC                                                      | 0                                       | 0          | 1                                          | 0.8877        | 0(0-Inf)                 |
| HEMATOMA, SPINAL CORD, TRAUMATIC                                                         | 0                                       | 0          | 1                                          | 0.8877        | 0(0-Inf)                 |
| HEMATOMA, SUBARACHNOID, TRAUMATIC                                                        | 0                                       | 0          | 2                                          | 3.0812        | 0(0-Inf)                 |
| HEMATOMA, SUBCONJUNCTIVAL                                                                | 3                                       | 21.611     | 8                                          | 1.9387        | 11.1471(2.8929-42.9524)  |
| HEMATOMA, SUBDURAL, ACUTE                                                                | 3                                       | 37.1136    | 25                                         | 16.7783       | 2.212(0.6642-7.3666)     |
| HEMATOMA, SUBDURAL, CHRONIC                                                              | 4                                       | 61.7953    | 40                                         | 35.8236       | 1.725(0.6153-4.8358)     |
| HEMATOMA, SUBDURAL, LATE EFFECT, TRAUMATIC                                               | 0                                       | 0          | 11                                         | 5.3753        | 0(0-Inf)                 |
| HEMATOMA, SUBDURAL, NOS                                                                  | 9                                       | 139.9398   | 98                                         | 90.4994       | 1.5463(0.7797-3.0665)    |
| HEMATOMA, SUBDURAL, TRAUMATIC                                                            | 1                                       | 13.212     | 38                                         | 28.2137       | 0.4683(0.0641-3.4183)    |
| HEMATOMA, SUBUNGUAL, FINGER                                                              | 3                                       | 25.8989    | 157                                        | 41.1093       | 0.63(0.2007-1.9778)      |
| HEMATOMA, SUBUNGUAL, NOS                                                                 | 2                                       | 18.0135    | 48                                         | 20.5181       | 0.8779(0.2127-3.6241)    |
| HEMATOMA, SUBUNGUAL, TOE                                                                 | 2                                       | 17.3592    | 63                                         | 25.3758       | 0.6841(0.1669-2.8037)    |
| HEMATOMA, SUPRACLAVICULAR REGION                                                         | 0                                       | 0          | 1                                          | 0.234         | 0(0-Inf)                 |
| HEMATOMA, TESTICLE                                                                       | 0                                       | 0          | 1                                          | 2.4861        | 0(0-Inf)                 |
| HEMATOMA, THUMB                                                                          | 0                                       | 0          | 10                                         | 2.4677        | 0(0-Inf)                 |
| HEMATOMA, VULVA                                                                          | 0                                       | 0          | 5                                          | 1.3995        | 0(0-Inf)                 |

| Description                                             | No. of Positive Cases with Disease Code | Case Rate* | No. of Positive Controls with Disease Code | Control Rate* | Relative Risk (95%CI)    |
|---------------------------------------------------------|-----------------------------------------|------------|--------------------------------------------|---------------|--------------------------|
| HEMATOMA, VULVA, TRAUMATIC                              | 0                                       | 0          | 1                                          | 0.398         | 0(0-Inf)                 |
| HEMATOMETRA                                             | 0                                       | 0          | 8                                          | 1.797         | 0(0-Inf)                 |
| HEMATOPOIESIS, EXTRAMEDULLARY (NOS)                     | 0                                       | 0          | 5                                          | 1.5259        | 0(0-Inf)                 |
| HEMATOSALPINX                                           | 0                                       | 0          | 5                                          | 2.2883        | 0(0-Inf)                 |
| HEMATOSPERMIA                                           | 7                                       | 97.0772    | 117                                        | 64.41         | 1.5072(0.7013-3.2389)    |
| HEMATURIA, BENIGN ESSENTIAL                             | 1                                       | 7.6072     | 13                                         | 3.1406        | 2.4222(0.3132-18.732)    |
| HEMATURIA, IDIOPATHIC                                   | 1                                       | 7.1892     | 13                                         | 3.1756        | 2.2639(0.293-17.4933)    |
| HEMATURIA, NOS--HMT                                     | 86                                      | 789.6975   | 2147                                       | 900.6988      | 0.8768(0.7064-1.0882)    |
| HEMIANOPSIA, BITEMPORAL                                 | 0                                       | 0          | 9                                          | 2.4877        | 0(0-Inf)                 |
| HEMIANOPSIA, HOMONYMOUS                                 | 5                                       | 47.6692    | 108                                        | 50.4382       | 0.9451(0.3846-2.3223)    |
| HEMIANOPSIA, NOS                                        | 1                                       | 11.5624    | 17                                         | 10.5749       | 1.0934(0.1447-8.2637)    |
| HEMIATROPHY, CEREBELLAR                                 | 0                                       | 0          | 3                                          | 2.6695        | 0(0-Inf)                 |
| HEMIATROPHY, CONGENITAL (FASCIA)                        | 0                                       | 0          | 1                                          | 0.3526        | 0(0-Inf)                 |
| HEMIATROPHY, NOS (FASCIA)                               | 1                                       | 13.2817    | 1                                          | 0.3759        | 35.3354(2.1343-585.0091) |
| HEMIBALLISMUS                                           | 0                                       | 0          | 1                                          | 0.4048        | 0(0-Inf)                 |
| HEMIBLOCK, LEFT ANTERIOR                                | 0                                       | 0          | 3                                          | 0.9165        | 0(0-Inf)                 |
| HEMICHOREA                                              | 0                                       | 0          | 4                                          | 1.932         | 0(0-Inf)                 |
| HEMICRANIA                                              | 3                                       | 21.1384    | 16                                         | 4.2772        | 4.9421(1.4191-17.2112)   |
| HEMIHYPERESTHESIA                                       | 0                                       | 0          | 1                                          | 0.234         | 0(0-Inf)                 |
| HEMIHYPERTROPHY, CONGENITAL                             | 0                                       | 0          | 1                                          | 0.3526        | 0(0-Inf)                 |
| HEMIHYPESTHESIA                                         | 0                                       | 0          | 1                                          | 0.3526        | 0(0-Inf)                 |
| HEMIPARESIS (SEE ALSO HEMIPLEGIA)                       | 5                                       | 67.1911    | 155                                        | 118.6133      | 0.5665(0.2322-1.3819)    |
| HEMIPARKINSONISM, NOS                                   | 0                                       | 0          | 7                                          | 2.5589        | 0(0-Inf)                 |
| HEMIPLEGIA, BRAIN, TRAUMATIC                            | 0                                       | 0          | 2                                          | 0.6309        | 0(0-Inf)                 |
| HEMIPLEGIA, CONGENITAL (INFANTILE)                      | 1                                       | 8.5528     | 4                                          | 1.0846        | 7.8856(0.8605-72.266)    |
| HEMIPLEGIA, DOUBLE                                      | 0                                       | 0          | 1                                          | 0.2729        | 0(0-Inf)                 |
| HEMIPLEGIA, DUE TO BIRTH INJURY                         | 1                                       | 6.8925     | 0                                          | 0             | 12238708958.0877(0-Inf)  |
| HEMIPLEGIA, DUE TO CEREBROVASCULAR ACCIDENT             | 5                                       | 70.3883    | 144                                        | 119.4562      | 0.5892(0.2413-1.439)     |
| HEMIPLEGIA, DUE TO CURRENT CEREBRAL EMBOLISM            | 1                                       | 9.043      | 15                                         | 6.4456        | 1.403(0.1838-10.7064)    |
| HEMIPLEGIA, DUE TO CURRENT CVA                          | 5                                       | 51.396     | 52                                         | 26.9914       | 1.9042(0.7573-4.7881)    |
| HEMIPLEGIA, DUE TO OLD CEREBRAL EMBOLISM                | 2                                       | 17.9531    | 59                                         | 25.0484       | 0.7167(0.1746-2.9425)    |
| HEMIPLEGIA, DUE TO OLD CEREBROVASCULAR DISORDER NEC/NOS | 13                                      | 174.0151   | 187                                        | 143.1832      | 1.2153(0.6916-2.1358)    |
| HEMIPLEGIA, NOS (NOT DUE TO CEREBROVASCULAR ACCIDENT)   | 0                                       | 0          | 26                                         | 6.2314        | 0(0-Inf)                 |
| HEMIPLEGIA, NOS, ACQUIRED                               | 3                                       | 32.1893    | 83                                         | 46.361        | 0.6943(0.2189-2.2018)    |
| HEMIPLEGIA, POST-TRAUMATIC                              | 0                                       | 0          | 4                                          | 1.0273        | 0(0-Inf)                 |
| HEMIPLEGIA, SPASTIC, CONGENITAL                         | 1                                       | 14.9004    | 1                                          | 0.3476        | 42.8675(2.556-718.9511)  |
| HEMIPLEGIA, SPASTIC, NOS, SEE ALSO PARALYSIS            | 1                                       | 8.2947     | 25                                         | 9.4672        | 0.8762(0.1182-6.497)     |
| HEMIPLEGIA, SPINAL CORD                                 | 0                                       | 0          | 1                                          | 0.2354        | 0(0-Inf)                 |
| HEMIPLEGIA, SUBDURAL, LATE EFFECT, TRAUMATIC            | 0                                       | 0          | 1                                          | 0.8528        | 0(0-Inf)                 |

| Description                                                                | No. of Positive Cases with Disease Code | Case Rate* | No. of Positive Controls with Disease Code | Control Rate* | Relative Risk (95%CI)  |
|----------------------------------------------------------------------------|-----------------------------------------|------------|--------------------------------------------|---------------|------------------------|
| HEMOBILIA                                                                  | 0                                       | 0          | 2                                          | 0.7896        | 0(0-Inf)               |
| HEMOCHROMATOSIS                                                            | 1                                       | 7.6261     | 45                                         | 14.6337       | 0.5211(0.0717-3.7903)  |
| HEMOCONCENTRATION (SEE ALSO ANHYDREMIA)                                    | 0                                       | 0          | 1                                          | 0.2354        | 0(0-Inf)               |
| HEMODYNAMICS UNSTABLE                                                      | 0                                       | 0          | 76                                         | 38.9351       | 0(0-Inf)               |
| HEMOGLOBINOPATHY, D                                                        | 0                                       | 0          | 1                                          | 0.398         | 0(0-Inf)               |
| HEMOGLOBINOPATHY, E                                                        | 0                                       | 0          | 1                                          | 0.2354        | 0(0-Inf)               |
| HEMOGLOBINOPATHY, LEPORE                                                   | 0                                       | 0          | 1                                          | 0.2354        | 0(0-Inf)               |
| HEMOGLOBINOPATHY, NOS, SEE ALSO TRAIT AND DISEASE                          | 0                                       | 0          | 4                                          | 0.9237        | 0(0-Inf)               |
| HEMOLYSIS, DUE TO INTERNAL PROSTHETIC DEVICE                               | 0                                       | 0          | 2                                          | 1.1972        | 0(0-Inf)               |
| HEMOLYSIS, NOS                                                             | 1                                       | 9.9687     | 12                                         | 5.9827        | 1.6663(0.2147-12.933)  |
| HEMOPERICARDIUM, NOS, SEE ALSO PERICARDITIS                                | 0                                       | 0          | 4                                          | 1.6244        | 0(0-Inf)               |
| HEMOPERITONEUM, NOS                                                        | 1                                       | 6.9268     | 3                                          | 0.7346        | 9.4288(0.9419-94.3832) |
| HEMOPERITONEUM, TRAUMATIC, NEC, SEE ALSO INJURY, INTERNAL, INTRA-ABDOMINAL | 0                                       | 0          | 2                                          | 0.4681        | 0(0-Inf)               |
| HEMOPHILIA, A                                                              | 0                                       | 0          | 1                                          | 1.0363        | 0(0-Inf)               |
| HEMOPHILIA, CARRIER                                                        | 0                                       | 0          | 1                                          | 0.234         | 0(0-Inf)               |
| HEMOPHILIA, CLASSIC                                                        | 0                                       | 0          | 1                                          | 1.0363        | 0(0-Inf)               |
| HEMOPHILIA, NOS                                                            | 0                                       | 0          | 1                                          | 0.4751        | 0(0-Inf)               |
| HEMOPNEUMOTHORAX, NOS                                                      | 0                                       | 0          | 6                                          | 3.9699        | 0(0-Inf)               |
| HEMOPNEUMOTHORAX, TRAUMATIC, CODE ALSO PNEUMOTHORAX TRAUMATIC              | 0                                       | 0          | 7                                          | 3.5099        | 0(0-Inf)               |
| HEMOPTYSIS, NOS (LUNG/BRONCHUS SOURCE)                                     | 19                                      | 166.2056   | 336                                        | 136.1306      | 1.2209(0.7679-1.9413)  |
| HEMORRHAGE, ABDOMEN                                                        | 1                                       | 7.2175     | 14                                         | 4.034         | 1.7892(0.2328-13.7491) |
| HEMORRHAGE, ADRENAL                                                        | 0                                       | 0          | 3                                          | 2.048         | 0(0-Inf)               |
| HEMORRHAGE, ARTERY, NEC                                                    | 1                                       | 12.004     | 13                                         | 8.4021        | 1.4287(0.1857-10.9914) |
| HEMORRHAGE, BLADDER                                                        | 0                                       | 0          | 11                                         | 8.4718        | 0(0-Inf)               |
| HEMORRHAGE, BRAIN, LATE EFFECT, TRAUMATIC                                  | 0                                       | 0          | 2                                          | 0.5474        | 0(0-Inf)               |
| HEMORRHAGE, BRAIN, NOS                                                     | 2                                       | 23.567     | 84                                         | 53.503        | 0.4405(0.1082-1.7934)  |
| HEMORRHAGE, BRAIN, OLD                                                     | 3                                       | 28.5975    | 51                                         | 23.7164       | 1.2058(0.3749-3.8783)  |
| HEMORRHAGE, BRAIN, TRAUMATIC                                               | 1                                       | 10.6759    | 15                                         | 8.2408        | 1.2955(0.17-9.8726)    |
| HEMORRHAGE, BRONCHUS                                                       | 0                                       | 0          | 5                                          | 3.7928        | 0(0-Inf)               |
| HEMORRHAGE, CEREBRAL, NOS                                                  | 3                                       | 36.4016    | 43                                         | 28.4689       | 1.2786(0.3952-4.1365)  |
| HEMORRHAGE, CERVIX                                                         | 0                                       | 0          | 7                                          | 1.6388        | 0(0-Inf)               |
| HEMORRHAGE, CHOROID NOS                                                    | 1                                       | 10.2235    | 7                                          | 3.6292        | 2.817(0.3417-23.2261)  |
| HEMORRHAGE, CHOROID, EXPULSIVE                                             | 0                                       | 0          | 2                                          | 0.5709        | 0(0-Inf)               |
| HEMORRHAGE, CONJUNCTIVAL                                                   | 0                                       | 0          | 48                                         | 13.6755       | 0(0-Inf)               |
| HEMORRHAGE, CORPUS LUTEUM                                                  | 0                                       | 0          | 20                                         | 15.4182       | 0(0-Inf)               |
| HEMORRHAGE, DERMAL                                                         | 0                                       | 0          | 15                                         | 5.6662        | 0(0-Inf)               |
| HEMORRHAGE, DRANCE (OPTIC NERVE)                                           | 2                                       | 18.2561    | 8                                          | 3.5172        | 5.1905(1.0824-24.8915) |
| HEMORRHAGE, DUODENUM                                                       | 1                                       | 10.3948    | 6                                          | 3.1694        | 3.2797(0.389-27.6526)  |

| Description                                               | No. of Positive Cases with Disease Code | Case Rate* | No. of Positive Controls with Disease Code | Control Rate* | Relative Risk (95%CI)  |
|-----------------------------------------------------------|-----------------------------------------|------------|--------------------------------------------|---------------|------------------------|
| HEMORRHAGE, EAR                                           | 0                                       | 0          | 13                                         | 4.014         | 0(0-Inf)               |
| HEMORRHAGE, ESOPHAGUS                                     | 0                                       | 0          | 9                                          | 6.2364        | 0(0-Inf)               |
| HEMORRHAGE, EXTERNAL                                      | 0                                       | 0          | 2                                          | 0.4708        | 0(0-Inf)               |
| HEMORRHAGE, EYE                                           | 4                                       | 37.466     | 110                                        | 49.762        | 0.7529(0.277-2.0463)   |
| HEMORRHAGE, EYE, NONTRAUMATIC                             | 0                                       | 0          | 12                                         | 4.4555        | 0(0-Inf)               |
| HEMORRHAGE, EYELID                                        | 0                                       | 0          | 1                                          | 0.888         | 0(0-Inf)               |
| HEMORRHAGE, GASTROINTESTINAL, LOWER--HLGI                 | 0                                       | 0          | 29                                         | 12.9563       | 0(0-Inf)               |
| HEMORRHAGE, GASTROINTESTINAL, UPPER--HUGI                 | 2                                       | 15.1144    | 23                                         | 7.2955        | 2.0717(0.4845-8.8586)  |
| HEMORRHAGE, GINGIVA                                       | 0                                       | 0          | 3                                          | 2.0837        | 0(0-Inf)               |
| HEMORRHAGE, HEART                                         | 0                                       | 0          | 1                                          | 0.3526        | 0(0-Inf)               |
| HEMORRHAGE, INTERNAL ORGANS                               | 0                                       | 0          | 1                                          | 0.8877        | 0(0-Inf)               |
| HEMORRHAGE, INTRA-ABDOMINAL                               | 2                                       | 14.1012    | 11                                         | 2.9046        | 4.8548(1.0566-22.3063) |
| HEMORRHAGE, INTRACEREBRAL                                 | 2                                       | 22.7453    | 70                                         | 42.394        | 0.5365(0.1313-2.1924)  |
| HEMORRHAGE, INTRACRANIAL                                  | 0                                       | 0          | 43                                         | 29.986        | 0(0-Inf)               |
| HEMORRHAGE, INTRACRANIAL, WITH PARALYSIS                  | 0                                       | 0          | 2                                          | 1.8978        | 0(0-Inf)               |
| HEMORRHAGE, INTRAOCULAR                                   | 0                                       | 0          | 2                                          | 1.777         | 0(0-Inf)               |
| HEMORRHAGE, INTRAOPERATIVE                                | 0                                       | 0          | 4                                          | 1.0273        | 0(0-Inf)               |
| HEMORRHAGE, INTRAOVARIAN                                  | 0                                       | 0          | 1                                          | 0.398         | 0(0-Inf)               |
| HEMORRHAGE, INTRAPERITONEAL                               | 0                                       | 0          | 10                                         | 2.3642        | 0(0-Inf)               |
| HEMORRHAGE, KIDNEY                                        | 1                                       | 8.3323     | 7                                          | 2.6421        | 3.1536(0.3818-26.0497) |
| HEMORRHAGE, LEG, NEC                                      | 0                                       | 0          | 18                                         | 5.1431        | 0(0-Inf)               |
| HEMORRHAGE, LIVER                                         | 0                                       | 0          | 3                                          | 1.9763        | 0(0-Inf)               |
| HEMORRHAGE, LOWER EXTREMITY, NEC                          | 3                                       | 24.5109    | 52                                         | 18.9408       | 1.2941(0.4024-4.1613)  |
| HEMORRHAGE, LUNG                                          | 1                                       | 13.1921    | 20                                         | 14.7128       | 0.8966(0.1198-6.7082)  |
| HEMORRHAGE, MACULAR                                       | 2                                       | 21.7075    | 31                                         | 17.7191       | 1.2251(0.2918-5.1439)  |
| HEMORRHAGE, MOUTH                                         | 1                                       | 6.9383     | 3                                          | 0.7347        | 9.4434(0.9435-94.5197) |
| HEMORRHAGE, MUCOUS MEMBRANE, NEC                          | 0                                       | 0          | 1                                          | 0.8877        | 0(0-Inf)               |
| HEMORRHAGE, MUSCLE                                        | 2                                       | 14.2       | 22                                         | 6.1478        | 2.3098(0.5384-9.9096)  |
| HEMORRHAGE, NASOPHARYNX                                   | 1                                       | 10.2913    | 6                                          | 3.2271        | 3.189(0.3776-26.9314)  |
| HEMORRHAGE, NIPPLE                                        | 0                                       | 0          | 14                                         | 6.1002        | 0(0-Inf)               |
| HEMORRHAGE, NOS, SEE ALSO HEMATOMA                        | 3                                       | 26.2576    | 21                                         | 8.5479        | 3.0718(0.9078-10.3948) |
| HEMORRHAGE, PENIS                                         | 0                                       | 0          | 15                                         | 13.8816       | 0(0-Inf)               |
| HEMORRHAGE, PERITONEUM                                    | 0                                       | 0          | 4                                          | 1.9693        | 0(0-Inf)               |
| HEMORRHAGE, PETECHIAL                                     | 2                                       | 19.2613    | 7                                          | 3.3069        | 5.8246(1.1896-28.5198) |
| HEMORRHAGE, POSTEXTRACTION, TOOTH                         | 0                                       | 0          | 3                                          | 0.7175        | 0(0-Inf)               |
| HEMORRHAGE, POSTOPERATIVE--HPO                            | 3                                       | 23.101     | 59                                         | 19.5522       | 1.1815(0.369-3.7833)   |
| HEMORRHAGE, POSTPARTUM (FIRST 24 HRS. FOLLOWING DELIVERY) | 0                                       | 0          | 1                                          | 0.8273        | 0(0-Inf)               |
| HEMORRHAGE, POSTPARTUM, DELAYED                           | 0                                       | 0          | 1                                          | 0.8271        | 0(0-Inf)               |
| HEMORRHAGE, PRERETINAL                                    | 0                                       | 0          | 9                                          | 5.162         | 0(0-Inf)               |

| Description                                        | No. of Positive Cases with Disease Code | Case Rate* | No. of Positive Controls with Disease Code | Control Rate* | Relative Risk (95%CI)    |
|----------------------------------------------------|-----------------------------------------|------------|--------------------------------------------|---------------|--------------------------|
| HEMORRHAGE, RECTUS SHEATH                          | 1                                       | 10.6631    | 8                                          | 4.4018        | 2.4224(0.2994-19.6022)   |
| HEMORRHAGE, RESPIRATORY SINUS (ANY)                | 0                                       | 0          | 1                                          | 0.8527        | 0(0-Inf)                 |
| HEMORRHAGE, RETINAL                                | 3                                       | 27.1231    | 84                                         | 36.1346       | 0.7506(0.2367-2.3805)    |
| HEMORRHAGE, RETROBULBAR                            | 0                                       | 0          | 2                                          | 1.1975        | 0(0-Inf)                 |
| HEMORRHAGE, RETROPERITONEAL                        | 1                                       | 10.364     | 15                                         | 7.9794        | 1.2988(0.1703-9.9048)    |
| HEMORRHAGE, SCALP, NOS                             | 0                                       | 0          | 1                                          | 0.8877        | 0(0-Inf)                 |
| HEMORRHAGE, SCROTUM                                | 1                                       | 8.0231     | 7                                          | 2.6124        | 3.0712(0.3735-25.2561)   |
| HEMORRHAGE, SKIN                                   | 1                                       | 9.0304     | 24                                         | 10.3406       | 0.8733(0.1176-6.4855)    |
| HEMORRHAGE, SPERMATIC CORD                         | 0                                       | 0          | 1                                          | 0.2729        | 0(0-Inf)                 |
| HEMORRHAGE, SPINAL CORD (NONTRAUMATIC)             | 0                                       | 0          | 3                                          | 1.5759        | 0(0-Inf)                 |
| HEMORRHAGE, SPLEEN                                 | 0                                       | 0          | 3                                          | 0.8874        | 0(0-Inf)                 |
| HEMORRHAGE, STOMACH, NOS                           | 2                                       | 26.0465    | 46                                         | 33.422        | 0.7793(0.1887-3.219)     |
| HEMORRHAGE, SUBARACHNOID, DUE TO RUPTURED ANEURYSM | 0                                       | 0          | 8                                          | 2.2525        | 0(0-Inf)                 |
| HEMORRHAGE, SUBARACHNOID, LATE EFFECT              | 0                                       | 0          | 11                                         | 3.9179        | 0(0-Inf)                 |
| HEMORRHAGE, SUBARACHNOID, NOS                      | 3                                       | 22.3776    | 72                                         | 22.0657       | 1.0141(0.3184-3.2302)    |
| HEMORRHAGE, SUBARACHNOID, TRAUMATIC                | 0                                       | 0          | 21                                         | 11.4564       | 0(0-Inf)                 |
| HEMORRHAGE, SUBARACHNOID, WITH PARALYSIS           | 1                                       | 7.7853     | 1                                          | 0.338         | 23.0337(1.3504-392.8861) |
| HEMORRHAGE, SUBCONJUNCTIVAL                        | 28                                      | 208.7814   | 906                                        | 276.2131      | 0.7559(0.5185-1.102)     |
| HEMORRHAGE, SUBCUTANEOUS                           | 2                                       | 14.5375    | 32                                         | 9.5162        | 1.5277(0.364-6.412)      |
| HEMORRHAGE, SUBDURAL, NOS                          | 1                                       | 14.2305    | 4                                          | 3.4855        | 4.0828(0.4494-37.092)    |
| HEMORRHAGE, SUBDURAL, TRAUMATIC                    | 0                                       | 0          | 2                                          | 1.1614        | 0(0-Inf)                 |
| HEMORRHAGE, SUBHYALOID                             | 0                                       | 0          | 1                                          | 0.8877        | 0(0-Inf)                 |
| HEMORRHAGE, SUBRETINAL                             | 3                                       | 34.946     | 35                                         | 22.1002       | 1.5813(0.484-5.1657)     |
| HEMORRHAGE, SUBUNGUAL                              | 0                                       | 0          | 18                                         | 5.1103        | 0(0-Inf)                 |
| HEMORRHAGE, TESTICLE                               | 1                                       | 9.1995     | 1                                          | 0.4528        | 20.3158(1.2288-335.8804) |
| HEMORRHAGE, THIGH                                  | 0                                       | 0          | 11                                         | 6.9141        | 0(0-Inf)                 |
| HEMORRHAGE, THROAT                                 | 1                                       | 7.0107     | 7                                          | 1.7117        | 4.0958(0.4943-33.9401)   |
| HEMORRHAGE, THYROID                                | 0                                       | 0          | 6                                          | 1.4229        | 0(0-Inf)                 |
| HEMORRHAGE, TONGUE                                 | 0                                       | 0          | 4                                          | 2.3958        | 0(0-Inf)                 |
| HEMORRHAGE, TONSIL                                 | 0                                       | 0          | 1                                          | 0.8273        | 0(0-Inf)                 |
| HEMORRHAGE, TRACHEA                                | 0                                       | 0          | 3                                          | 2.8211        | 0(0-Inf)                 |
| HEMORRHAGE, UPPER EXTREMITY                        | 0                                       | 0          | 38                                         | 11.28         | 0(0-Inf)                 |
| HEMORRHAGE, UTERUS, NOS                            | 2                                       | 35.8651    | 29                                         | 13.1292       | 2.7317(0.6465-11.5426)   |
| HEMORRHAGE, VAGINA                                 | 5                                       | 70.4681    | 275                                        | 145.8253      | 0.4832(0.1992-1.1721)    |
| HEMORRHAGE, VITREOUS                               | 8                                       | 61.6429    | 172                                        | 56.5404       | 1.0902(0.5354-2.2201)    |
| HEMORRHAGE, VOCAL CORD                             | 0                                       | 0          | 7                                          | 2.5579        | 0(0-Inf)                 |
| HEMORRHOIDS, BLEEDING--HMRB                        | 15                                      | 106.2685   | 338                                        | 83.8376       | 1.2676(0.7544-2.1298)    |
| HEMORRHOIDS, EXTERNAL--HMEX                        | 15                                      | 105.496    | 612                                        | 153.9184      | 0.6854(0.4102-1.1451)    |
| HEMORRHOIDS, INTERNAL--HMIN                        | 55                                      | 423.5407   | 1718                                       | 554.9441      | 0.7632(0.5831-0.9989)    |
| HEMORRHOIDS, NOS--HEMR                             | 64                                      | 473.033    | 1642                                       | 434.5432      | 1.0886(0.8474-1.3984)    |



| Description                                                        | No. of Positive Cases with Disease Code | Case Rate* | No. of Positive Controls with Disease Code | Control Rate* | Relative Risk (95%CI)    |
|--------------------------------------------------------------------|-----------------------------------------|------------|--------------------------------------------|---------------|--------------------------|
| HEMORRHOIDS, ULCERATIVE                                            | 0                                       | 0          | 2                                          | 0.5069        | 0(0-Inf)                 |
| HEMOSALPINX                                                        | 0                                       | 0          | 1                                          | 0.398         | 0(0-Inf)                 |
| HEMOSIDEROSIS, NOS                                                 | 1                                       | 7.1138     | 17                                         | 4.7837        | 1.4871(0.1963-11.2658)   |
| HEMOSIDEROSIS, TRANSFUSION                                         | 0                                       | 0          | 1                                          | 0.3526        | 0(0-Inf)                 |
| HEMOTHORAX, DUE TO OPERATIVE INJURY OF CHEST WALL                  | 0                                       | 0          | 4                                          | 1.03          | 0(0-Inf)                 |
| HEMOTHORAX, NOS                                                    | 2                                       | 18.9246    | 14                                         | 6.4457        | 2.936(0.6604-13.0529)    |
| HEMOTHORAX, TRAUMATIC                                              | 3                                       | 25.0596    | 18                                         | 6.8584        | 3.6538(1.0657-12.5273)   |
| HEMOTHORAX, TRAUMATIC, LATE EFFECT                                 | 0                                       | 0          | 2                                          | 0.7896        | 0(0-Inf)                 |
| HEMOTYMPANUM                                                       | 2                                       | 14.7719    | 5                                          | 1.5649        | 9.4397(1.7898-49.7876)   |
| HEPATITIS, ACUTE                                                   | 1                                       | 7.3845     | 14                                         | 4.2156        | 1.7517(0.2279-13.4632)   |
| HEPATITIS, ALCOHOLIC                                               | 1                                       | 6.9532     | 56                                         | 14.2861       | 0.4867(0.0672-3.5248)    |
| HEPATITIS, ANICTERIC, SEE ALSO HEPATITIS, VIRAL                    | 0                                       | 0          | 1                                          | 0.234         | 0(0-Inf)                 |
| HEPATITIS, AUTOIMMUNE                                              | 0                                       | 0          | 17                                         | 4.1036        | 0(0-Inf)                 |
| HEPATITIS, B ANTIGEN                                               | 0                                       | 0          | 10                                         | 3.3464        | 0(0-Inf)                 |
| HEPATITIS, C                                                       | 3                                       | 22.3783    | 36                                         | 11.3593       | 1.97(0.6031-6.4352)      |
| HEPATITIS, CHOLESTATIC                                             | 0                                       | 0          | 7                                          | 1.7396        | 0(0-Inf)                 |
| HEPATITIS, CHRONIC                                                 | 4                                       | 28.1027    | 38                                         | 9.1298        | 3.0781(1.09-8.6928)      |
| HEPATITIS, CHRONIC (ACTIVE), TYPE B                                | 0                                       | 0          | 8                                          | 1.9998        | 0(0-Inf)                 |
| HEPATITIS, CHRONIC (ACTIVE), TYPE C                                | 2                                       | 14.0193    | 33                                         | 9.1119        | 1.5386(0.3671-6.449)     |
| HEPATITIS, CHRONIC, ACTIVE                                         | 0                                       | 0          | 11                                         | 2.812         | 0(0-Inf)                 |
| HEPATITIS, CONTACT/EXPOSURE                                        | 0                                       | 0          | 5                                          | 1.9394        | 0(0-Inf)                 |
| HEPATITIS, CYTOMEGALIC                                             | 1                                       | 7.9589     | 3                                          | 0.6523        | 12.2007(1.2166-122.3518) |
| HEPATITIS, DRUG INDUCED, CODE ALSO EFFECT ADVERSE DRUG SPECIFIED   | 0                                       | 0          | 16                                         | 5.2072        | 0(0-Inf)                 |
| HEPATITIS, GRANULOMATOUS                                           | 0                                       | 0          | 4                                          | 0.8814        | 0(0-Inf)                 |
| HEPATITIS, INFECTIOUS                                              | 0                                       | 0          | 4                                          | 1.1113        | 0(0-Inf)                 |
| HEPATITIS, NON-A/NON-B                                             | 0                                       | 0          | 2                                          | 1.0783        | 0(0-Inf)                 |
| HEPATITIS, NOS                                                     | 3                                       | 21.0613    | 86                                         | 23.3371       | 0.9025(0.2846-2.8623)    |
| HEPATITIS, TOXIC (DRUG INDUCED), CODE ALSO EFFECT, ADVERSE BY DRUG | 0                                       | 0          | 22                                         | 5.301         | 0(0-Inf)                 |
| HEPATITIS, TRANSFUSION                                             | 0                                       | 0          | 1                                          | 0.2729        | 0(0-Inf)                 |
| HEPATITIS, VIRAL, NOS                                              | 1                                       | 8.9326     | 10                                         | 2.546         | 3.5085(0.4426-27.8097)   |
| HEPATITIS, VIRAL, TYPE A                                           | 1                                       | 8.3076     | 10                                         | 2.517         | 3.3006(0.4167-26.1431)   |
| HEPATITIS, VIRAL, TYPE B                                           | 0                                       | 0          | 10                                         | 2.4734        | 0(0-Inf)                 |
| HEPATOMA, NOS (MALIGNANT)                                          | 2                                       | 23.8937    | 5                                          | 3.1999        | 7.4671(1.425-39.1278)    |
| HEPATOMEGALY, NOS                                                  | 5                                       | 39.8336    | 57                                         | 19.8531       | 2.0064(0.8002-5.0306)    |
| HEPATOTOXICITY (CODE ALSO EFFECT ADVERSE IF DUE TO DRUG)           | 0                                       | 0          | 14                                         | 3.6516        | 0(0-Inf)                 |
| HERALD PATCH (PITYRIASIS ROSEA)                                    | 0                                       | 0          | 1                                          | 0.2729        | 0(0-Inf)                 |
| HERMAPHRODITISM                                                    | 0                                       | 0          | 1                                          | 0.398         | 0(0-Inf)                 |

| Description                                   | No. of Positive Cases with Disease Code | Case Rate* | No. of Positive Controls with Disease Code | Control Rate* | Relative Risk (95%CI)  |
|-----------------------------------------------|-----------------------------------------|------------|--------------------------------------------|---------------|------------------------|
| HERNIA, ABDOMINAL                             | 5                                       | 43.5526    | 116                                        | 46.8109       | 0.9304(0.3792-2.283)   |
| HERNIA, ABDOMINAL WALL                        | 2                                       | 20.0325    | 98                                         | 49.2632       | 0.4066(0.1001-1.6518)  |
| HERNIA, ABDOMINAL, INCARCERATED               | 0                                       | 0          | 3                                          | 0.8018        | 0(0-Inf)               |
| HERNIA, BLADDER, MALE                         | 0                                       | 0          | 2                                          | 1.776         | 0(0-Inf)               |
| HERNIA, BRAIN, NOS                            | 0                                       | 0          | 10                                         | 4.7312        | 0(0-Inf)               |
| HERNIA, COLOSTOMY                             | 2                                       | 15.3045    | 11                                         | 3.619         | 4.2289(0.9245-19.345)  |
| HERNIA, DIAPHRAGMATIC C LOWER ESOPHAGEAL RING | 3                                       | 23.1212    | 52                                         | 17.1566       | 1.3477(0.419-4.3348)   |
| HERNIA, DIAPHRAGMATIC WITH SCHATZKI'S RING    | 6                                       | 50.4648    | 187                                        | 71.2699       | 0.7081(0.3136-1.599)   |
| HERNIA, DIAPHRAGMATIC, NOS--DH                | 129                                     | 1095.412   | 2902                                       | 907.2118      | 1.2074(1.0116-1.4412)  |
| HERNIA, DIAPHRAGMATIC, SHORT ESOPHAGUS TYPE   | 4                                       | 28.8162    | 35                                         | 9.9744        | 2.889(1.0189-8.1918)   |
| HERNIA, DIAPHRAGMATIC, SLIDING                | 19                                      | 138.3393   | 455                                        | 129.5725      | 1.0677(0.6737-1.692)   |
| HERNIA, DISC, CERVICAL                        | 0                                       | 0          | 28                                         | 6.9107        | 0(0-Inf)               |
| HERNIA, DISC, LUMBAR                          | 13                                      | 90.9834    | 321                                        | 82.5841       | 1.1017(0.6317-1.9214)  |
| HERNIA, DISC, NEC                             | 1                                       | 7.0024     | 23                                         | 6.153         | 1.138(0.1527-8.4806)   |
| HERNIA, DISC, THORACIC                        | 1                                       | 6.9392     | 13                                         | 3.2716        | 2.121(0.2745-16.3911)  |
| HERNIA, EPIGASTRIC                            | 1                                       | 6.9255     | 25                                         | 6.7955        | 1.0191(0.1374-7.5598)  |
| HERNIA, EPIGASTRIC, INCARCERATED              | 0                                       | 0          | 1                                          | 0.4049        | 0(0-Inf)               |
| HERNIA, FEMORAL                               | 4                                       | 28.7997    | 65                                         | 18.3376       | 1.5705(0.5694-4.3315)  |
| HERNIA, FEMORAL, INCARCERATED                 | 2                                       | 14.5588    | 34                                         | 9.8539        | 1.4775(0.3525-6.1921)  |
| HERNIA, FEMORAL, RECURRENT                    | 0                                       | 0          | 7                                          | 1.711         | 0(0-Inf)               |
| HERNIA, FEMORAL, RECURRENT, INCARCERATED      | 0                                       | 0          | 1                                          | 0.4048        | 0(0-Inf)               |
| HERNIA, FORAMEN OF BOCHDALEK                  | 0                                       | 0          | 6                                          | 1.7729        | 0(0-Inf)               |
| HERNIA, FORAMEN OF MORGAGNI, NOS              | 0                                       | 0          | 2                                          | 1.8978        | 0(0-Inf)               |
| HERNIA, HIATUS, SEE ALSO DIAPHRAGMATIC HERNIA | 64                                      | 568.8631   | 1414                                       | 559.5941      | 1.0166(0.7907-1.3069)  |
| HERNIA, INCISIONAL                            | 9                                       | 68.8375    | 278                                        | 90.1413       | 0.7637(0.3926-1.4855)  |
| HERNIA, INGUINAL, BILATERAL                   | 13                                      | 111.4183   | 160                                        | 63.0883       | 1.7661(1.0017-3.1138)  |
| HERNIA, INGUINAL, BILATERAL, DIRECT           | 8                                       | 111.6028   | 93                                         | 52.7125       | 2.1172(1.0255-4.3712)  |
| HERNIA, INGUINAL, BILATERAL, INDIRECT         | 2                                       | 14.3443    | 59                                         | 17.8663       | 0.8029(0.1957-3.2945)  |
| HERNIA, INGUINAL, DIRECT, LEFT                | 12                                      | 89.0163    | 243                                        | 78.2844       | 1.1371(0.636-2.0331)   |
| HERNIA, INGUINAL, DIRECT, NOS                 | 2                                       | 36.0239    | 14                                         | 12.221        | 2.9477(0.665-13.0667)  |
| HERNIA, INGUINAL, DIRECT, RIGHT               | 12                                      | 92.9937    | 312                                        | 106.8432      | 0.8704(0.4884-1.551)   |
| HERNIA, INGUINAL, INDIRECT, LEFT              | 13                                      | 96.6944    | 392                                        | 126.3459      | 0.7653(0.44-1.3312)    |
| HERNIA, INGUINAL, INDIRECT, NOS               | 1                                       | 19.2143    | 14                                         | 13.4543       | 1.4281(0.1867-10.9221) |
| HERNIA, INGUINAL, INDIRECT, RIGHT             | 16                                      | 120.2455   | 478                                        | 157.0683      | 0.7656(0.4648-1.261)   |
| HERNIA, INGUINAL, NOS, INCARCERATED           | 2                                       | 23.0712    | 52                                         | 31.8614       | 0.7241(0.176-2.9798)   |
| HERNIA, INGUINAL, NOS--INGH                   | 56                                      | 503.9194   | 1236                                       | 520.3981      | 0.9683(0.7404-1.2665)  |
| HERNIA, INGUINAL, RECURRENT                   | 13                                      | 97.4064    | 211                                        | 67.6878       | 1.4391(0.8206-2.5237)  |
| HERNIA, INGUINAL, RECURRENT, BILATERAL        | 1                                       | 14.0837    | 15                                         | 8.9643        | 1.5711(0.2062-11.97)   |
| HERNIA, INGUINAL, RECURRENT, INCARCERATED     | 1                                       | 7.237      | 7                                          | 2.2031        | 3.2849(0.3993-27.0233) |
| HERNIA, INTERNAL                              | 0                                       | 0          | 9                                          | 2.844         | 0(0-Inf)               |

| Description                                              | No. of Positive Cases with Disease Code | Case Rate* | No. of Positive Controls with Disease Code | Control Rate* | Relative Risk (95%CI)   |
|----------------------------------------------------------|-----------------------------------------|------------|--------------------------------------------|---------------|-------------------------|
| HERNIA, INTERNAL, INCARCERATED                           | 0                                       | 0          | 3                                          | 0.6986        | 0(0-Inf)                |
| HERNIA, INTRA-ABDOMINAL                                  | 0                                       | 0          | 3                                          | 0.6548        | 0(0-Inf)                |
| HERNIA, LUMBAR                                           | 0                                       | 0          | 4                                          | 1.1699        | 0(0-Inf)                |
| HERNIA, LUNG, NOS                                        | 0                                       | 0          | 2                                          | 0.5709        | 0(0-Inf)                |
| HERNIA, MUSCLE                                           | 0                                       | 0          | 4                                          | 0.9158        | 0(0-Inf)                |
| HERNIA, NEC                                              | 3                                       | 28.4915    | 114                                        | 53.1114       | 0.5364(0.1702-1.6906)   |
| HERNIA, NEC (INCARCERATED)                               | 1                                       | 9.9254     | 18                                         | 8.9025        | 1.1149(0.148-8.4009)    |
| HERNIA, NUCLEUS PULPOSUS                                 | 0                                       | 0          | 33                                         | 8.2382        | 0(0-Inf)                |
| HERNIA, OBSTRUCTIVE, SEE ALSO HERNIA, INCARCERATED       | 0                                       | 0          | 1                                          | 0.8878        | 0(0-Inf)                |
| HERNIA, OBTURATOR                                        | 0                                       | 0          | 1                                          | 0.8528        | 0(0-Inf)                |
| HERNIA, OMENTAL, NOS                                     | 0                                       | 0          | 4                                          | 1.4109        | 0(0-Inf)                |
| HERNIA, OMENTUM, INCARCERATED                            | 1                                       | 7.1483     | 4                                          | 0.9451        | 7.5633(0.819-69.8458)   |
| HERNIA, PARAESOPHAGEAL, NOS                              | 3                                       | 30.1816    | 44                                         | 22.3775       | 1.3487(0.417-4.3628)    |
| HERNIA, PARASTOMAL                                       | 3                                       | 27.9056    | 22                                         | 9.8609        | 2.8299(0.8398-9.536)    |
| HERNIA, PARA-UMBILICAL                                   | 1                                       | 7.4596     | 24                                         | 7.4114        | 1.0065(0.1353-7.4861)   |
| HERNIA, PELVIC FLOOR                                     | 0                                       | 0          | 1                                          | 0.8531        | 0(0-Inf)                |
| HERNIA, RICHTER'S                                        | 0                                       | 0          | 3                                          | 1.5761        | 0(0-Inf)                |
| HERNIA, SCROTAL                                          | 0                                       | 0          | 12                                         | 7.6008        | 0(0-Inf)                |
| HERNIA, SPIGELIAN                                        | 2                                       | 16.4809    | 15                                         | 5.5948        | 2.9458(0.6667-13.0162)  |
| HERNIA, STRANGULATED, NOS, SEE ALSO HERNIA, INCARCERATED | 0                                       | 0          | 5                                          | 1.4456        | 0(0-Inf)                |
| HERNIA, UMBILICAL (INCLUDES NEWBORN)                     | 10                                      | 70.7593    | 429                                        | 118.3124      | 0.5981(0.3192-1.1207)   |
| HERNIA, UMBILICAL, INCARCERATED                          | 1                                       | 7.3265     | 39                                         | 11.6261       | 0.6302(0.0862-4.6046)   |
| HERNIA, VAGINAL                                          | 0                                       | 0          | 1                                          | 0.4048        | 0(0-Inf)                |
| HERNIA, VENTRAL                                          | 8                                       | 60.3744    | 328                                        | 104.3049      | 0.5788(0.2867-1.1687)   |
| HERNIA, VENTRAL, INCARCERATED                            | 2                                       | 15.7456    | 33                                         | 11.2493       | 1.3997(0.3337-5.8704)   |
| HERNIA, VENTRAL, RECURRENT                               | 0                                       | 0          | 36                                         | 10.8292       | 0(0-Inf)                |
| HERNIA, VENTRAL, RECURRENT, INCARCERATED                 | 1                                       | 7.273      | 2                                          | 0.5819        | 12.4997(1.076-145.2056) |
| HERPANGINA                                               | 0                                       | 0          | 7                                          | 1.7377        | 0(0-Inf)                |
| HERPES SIMPLEX, ENCEPHALITIS                             | 1                                       | 6.8954     | 0                                          | 0             | 12245977123.2325(0-Inf) |
| HERPES SIMPLEX, EYE                                      | 3                                       | 24.2258    | 25                                         | 8.9643        | 2.7025(0.8094-9.0231)   |
| HERPES SIMPLEX, FACE, NOS                                | 12                                      | 84.1678    | 188                                        | 47.2812       | 1.7802(0.9903-3.2)      |
| HERPES SIMPLEX, GENITALIA                                | 2                                       | 15.4793    | 58                                         | 13.6818       | 1.1314(0.2752-4.6517)   |
| HERPES SIMPLEX, LATE EFFECT OF                           | 1                                       | 7.8346     | 5                                          | 1.6856        | 4.6478(0.5302-40.7432)  |
| HERPES SIMPLEX, MOUTH                                    | 3                                       | 20.9033    | 91                                         | 23.1697       | 0.9022(0.2847-2.8586)   |
| HERPES SIMPLEX, NEC                                      | 5                                       | 35.4343    | 37                                         | 8.6154        | 4.1129(1.6016-10.5619)  |
| HERPES SIMPLEX, NOS                                      | 9                                       | 65.0586    | 188                                        | 44.1972       | 1.472(0.7521-2.8811)    |
| HERPES SIMPLEX, PROGENITALIS                             | 1                                       | 9.4972     | 11                                         | 2.8624        | 3.3179(0.4226-26.0464)  |
| HERPES SIMPLEX, THROAT                                   | 0                                       | 0          | 5                                          | 1.2695        | 0(0-Inf)                |
| HERPES SIMPLEX, TYPE I                                   | 2                                       | 13.9923    | 23                                         | 5.3475        | 2.6166(0.6105-11.215)   |

| Description                                                    | No. of Positive Cases with Disease Code | Case Rate* | No. of Positive Controls with Disease Code | Control Rate* | Relative Risk (95%CI)  |
|----------------------------------------------------------------|-----------------------------------------|------------|--------------------------------------------|---------------|------------------------|
| HERPES SIMPLEX, TYPE II                                        | 1                                       | 7.8218     | 15                                         | 5.0231        | 1.5572(0.2037-11.9053) |
| HERPES ZOSTER, ABDOMEN                                         | 0                                       | 0          | 5                                          | 1.3507        | 0(0-Inf)               |
| HERPES ZOSTER, AURICULARIS                                     | 0                                       | 0          | 2                                          | 1.1614        | 0(0-Inf)               |
| HERPES ZOSTER, CRANIAL NERVES                                  | 0                                       | 0          | 24                                         | 11.9384       | 0(0-Inf)               |
| HERPES ZOSTER, EYE                                             | 1                                       | 9.64       | 49                                         | 23.4744       | 0.4107(0.0566-2.9815)  |
| HERPES ZOSTER, FACE, EXCEPT EYE                                | 3                                       | 21.6389    | 77                                         | 21.8834       | 0.9888(0.3109-3.1448)  |
| HERPES ZOSTER, LATE EFFECT OF                                  | 20                                      | 202.7385   | 289                                        | 143.6522      | 1.4113(0.8956-2.2241)  |
| HERPES ZOSTER, NOS                                             | 59                                      | 506.2814   | 1329                                       | 499.9738      | 1.0126(0.7796-1.3153)  |
| HERPES ZOSTER, OPHTHALMICUS                                    | 3                                       | 26.0819    | 75                                         | 30.2304       | 0.8628(0.2713-2.7438)  |
| HERPES ZOSTER, TRIGEMINAL                                      | 4                                       | 36.2205    | 32                                         | 13.7626       | 2.6318(0.9241-7.4952)  |
| HERPES ZOSTER, TRUNK                                           | 12                                      | 93.1926    | 410                                        | 135.4683      | 0.6879(0.387-1.2228)   |
| HERPES, NOS (SIMPLEX #)                                        | 1                                       | 7.8757     | 32                                         | 10.9934       | 0.7164(0.0975-5.2652)  |
| HESITANCY (URINARY)                                            | 2                                       | 22.0821    | 81                                         | 46.7337       | 0.4725(0.116-1.925)    |
| HETEROCHROMIA, IRITIS                                          | 0                                       | 0          | 1                                          | 0.2354        | 0(0-Inf)               |
| HETEROCHROMIA, NOS, SEE ALSO CYCLITIS                          | 0                                       | 0          | 5                                          | 1.2698        | 0(0-Inf)               |
| HETEROPHORIA, VERTICAL                                         | 0                                       | 0          | 12                                         | 3.7182        | 0(0-Inf)               |
| HETEROTOPIC, BONE FORMATION, ACQUIRED                          | 2                                       | 13.9473    | 27                                         | 6.8069        | 2.049(0.4837-8.6795)   |
| HETEROTOPIC, BONE FORMATION, NOS                               | 0                                       | 0          | 6                                          | 2.0981        | 0(0-Inf)               |
| HETEROTOPIC, GASTRIC FORMATION, ACQUIRED                       | 1                                       | 7.0247     | 12                                         | 3.21          | 2.1884(0.281-17.0422)  |
| HETEROTROPIA, NOS (EYE #)                                      | 0                                       | 0          | 1                                          | 0.2729        | 0(0-Inf)               |
| HETEROZYGOTE FOR THIOPURINE METHYLTRANSFERASE                  | 0                                       | 0          | 1                                          | 0.2354        | 0(0-Inf)               |
| HIBERNOMA CODE ALSO LIPOMA BY SITE                             | 0                                       | 0          | 2                                          | 0.7053        | 0(0-Inf)               |
| HICCUPS                                                        | 1                                       | 9.1096     | 36                                         | 16.0236       | 0.5685(0.0777-4.1575)  |
| HIDRADENITIS, NOS                                              | 2                                       | 17.5913    | 36                                         | 9.1585        | 1.9208(0.4597-8.0255)  |
| HIDRADENITIS, SUPPURATIVE                                      | 2                                       | 25.2184    | 47                                         | 14.5723       | 1.7306(0.4185-7.1557)  |
| HIDRADENOMA, MALIGNANT, CODE ALSO NEOPLASM, MALIGNANT BY SITE  | 0                                       | 0          | 1                                          | 0.8882        | 0(0-Inf)               |
| HIDRADENOMA, NOS, CODE ALSO NEOPLASM, BENIGN BY SITE           | 1                                       | 7.1312     | 21                                         | 5.8452        | 1.22(0.1629-9.1355)    |
| HIDRADENOMA, VULVA                                             | 0                                       | 0          | 3                                          | 0.6536        | 0(0-Inf)               |
| HIDROCYSTOMA, MALIGNANT, CODE ALSO NEOPLASM, MALIGNANT BY SITE | 0                                       | 0          | 1                                          | 0.2729        | 0(0-Inf)               |
| HIDROCYSTOMA, NOS, CODE ALSO NEOPLASM, BENIGN BY SITE          | 2                                       | 15.3319    | 59                                         | 19.1476       | 0.8007(0.195-3.2888)   |
| HIGH, ARCHES                                                   | 1                                       | 9.0863     | 6                                          | 2.6353        | 3.4479(0.4094-29.0361) |
| HIGH, BLOOD PRESSURE--HIBP                                     | 73                                      | 568.4541   | 2649                                       | 852.2603      | 0.667(0.5283-0.842)    |
| HIGH, FRENUM                                                   | 0                                       | 0          | 4                                          | 0.9363        | 0(0-Inf)               |
| HIRSUTIES (SEE ALSO HYPERTRICHOSIS)                            | 0                                       | 0          | 1                                          | 0.234         | 0(0-Inf)               |
| HIRSUTISM (SEE ALSO HYPERTRICHOSIS)                            | 2                                       | 33.8294    | 50                                         | 22.1742       | 1.5256(0.3693-6.3022)  |
| HISTIOCYTOMA, MALIGNANT, CODE ALSO NEOPLASM, MALIGNANT BY SITE | 0                                       | 0          | 12                                         | 4.7424        | 0(0-Inf)               |
| HISTIOCYTOMA, NOS, SEE ALSO DERMATOFIBROMA                     | 1                                       | 8.4436     | 7                                          | 1.5963        | 5.2895(0.6363-43.9679) |

| Description                                                           | No. of Positive Cases with Disease Code | Case Rate* | No. of Positive Controls with Disease Code | Control Rate* | Relative Risk (95%CI)    |
|-----------------------------------------------------------------------|-----------------------------------------|------------|--------------------------------------------|---------------|--------------------------|
| HISTIOCYTOSIS, NOS                                                    | 0                                       | 0          | 5                                          | 1.2369        | 0(0-Inf)                 |
| HISTIOCYTOSIS, SINUS                                                  | 0                                       | 0          | 3                                          | 0.7175        | 0(0-Inf)                 |
| HISTIOCYTOSIS, X, NOS                                                 | 0                                       | 0          | 2                                          | 0.4708        | 0(0-Inf)                 |
| HISTOPLASMA CAPSULATUM                                                | 0                                       | 0          | 4                                          | 1.3524        | 0(0-Inf)                 |
| HISTOPLASMOSIS, DISSEMINATED                                          | 1                                       | 6.9476     | 4                                          | 1.1099        | 6.2599(0.6834-57.3393)   |
| HISTOPLASMOSIS, NOS                                                   | 0                                       | 0          | 26                                         | 6.2293        | 0(0-Inf)                 |
| HISTOPLASMOSIS, OCULAR                                                | 1                                       | 6.9118     | 15                                         | 3.9537        | 1.7482(0.2289-13.3505)   |
| HISTOPLASMOSIS, PULMONARY, ACUTE                                      | 0                                       | 0          | 3                                          | 0.7175        | 0(0-Inf)                 |
| HISTOPLASMOSIS, PULMONARY, CHRONIC                                    | 0                                       | 0          | 1                                          | 0.234         | 0(0-Inf)                 |
| HISTOPLASMOSIS, PULMONARY, NOS                                        | 0                                       | 0          | 7                                          | 1.8163        | 0(0-Inf)                 |
| HISTORY OF, ALCOHOL INGESTION                                         | 3                                       | 24.399     | 29                                         | 10.7433       | 2.2711(0.6877-7.4997)    |
| HISTORY OF, ALLERGY, ANALGESIC                                        | 1                                       | 12.8603    | 21                                         | 6.354         | 2.024(0.2703-15.1537)    |
| HISTORY OF, ALLERGY, ANESTHETIC AGENT (NOVOCAIN/ETHER/PENTOTHAL,ETC.) | 7                                       | 50.8519    | 142                                        | 40.2314       | 1.264(0.5901-2.7075)     |
| HISTORY OF, ALLERGY, ANTIBIOTIC, NEC                                  | 3                                       | 24.5257    | 32                                         | 7.1592        | 3.4258(1.0394-11.2907)   |
| HISTORY OF, ALLERGY, ANTI-INFECTION AGENT, NEC                        | 0                                       | 0          | 5                                          | 1.1708        | 0(0-Inf)                 |
| HISTORY OF, ALLERGY, BEE STING                                        | 1                                       | 7.5224     | 5                                          | 1.6095        | 4.6736(0.5349-40.8384)   |
| HISTORY OF, ALLERGY, DRUG OR THERAPEUTIC AGENT, NEC--HXDA             | 158                                     | 1328.276   | 3821                                       | 1153.3085     | 1.1517(0.9818-1.3511)    |
| HISTORY OF, ALLERGY, FOOD                                             | 1                                       | 7.0146     | 34                                         | 8.1347        | 0.8623(0.1174-6.3312)    |
| HISTORY OF, ALLERGY, NARCOTIC                                         | 1                                       | 11.5959    | 34                                         | 8.9443        | 1.2965(0.1767-9.5147)    |
| HISTORY OF, ALLERGY, NOS                                              | 2                                       | 17.4347    | 37                                         | 8.9828        | 1.9409(0.4649-8.1039)    |
| HISTORY OF, ALLERGY, PENICILLIN--PENA                                 | 52                                      | 406.9829   | 1125                                       | 364.0929      | 1.1178(0.8457-1.4774)    |
| HISTORY OF, ALLERGY, SERUM, VACCINE (TETANUS)                         | 7                                       | 51.1588    | 103                                        | 30.3344       | 1.6865(0.7814-3.6399)    |
| HISTORY OF, ALLERGY, SULFA                                            | 33                                      | 257.6808   | 937                                        | 305.3118      | 0.844(0.5959-1.1954)     |
| HISTORY OF, BENIGN NEOPLASM                                           | 1                                       | 7.1781     | 37                                         | 10.4997       | 0.6836(0.0934-5.0041)    |
| HISTORY OF, CIGARETTE SMOKING                                         | 7                                       | 56.1759    | 271                                        | 96.7846       | 0.5804(0.2738-1.2306)    |
| HISTORY OF, CYST, BRAIN                                               | 0                                       | 0          | 1                                          | 0.2354        | 0(0-Inf)                 |
| HISTORY OF, DERMATOFIBROSARCOMA PROTUBERANS                           | 0                                       | 0          | 1                                          | 0.2354        | 0(0-Inf)                 |
| HISTORY OF, DISEASE, CARDIOVASCULAR                                   | 0                                       | 0          | 3                                          | 0.741         | 0(0-Inf)                 |
| HISTORY OF, DISEASE, GASTROINTESTINAL                                 | 0                                       | 0          | 1                                          | 0.2355        | 0(0-Inf)                 |
| HISTORY OF, DISEASE, GENITOURINARY                                    | 0                                       | 0          | 8                                          | 3.5594        | 0(0-Inf)                 |
| HISTORY OF, DISEASE, NEUROLOGIC                                       | 1                                       | 12.785     | 2                                          | 0.6014        | 21.2595(1.8507-244.2096) |
| HISTORY OF, DISEASE, NOS                                              | 1                                       | 12.0664    | 5                                          | 1.4558        | 8.2884(0.9452-72.6811)   |
| HISTORY OF, DISEASE, RESPIRATORY                                      | 0                                       | 0          | 4                                          | 1.1115        | 0(0-Inf)                 |
| HISTORY OF, DISEASE, VASCULAR                                         | 0                                       | 0          | 1                                          | 0.8271        | 0(0-Inf)                 |
| HISTORY OF, DRUGS ON MAINTENANCE THERAPY, ANTICOAGULANTS              | 83                                      | 918.9581   | 1843                                       | 1010.3391     | 0.9096(0.7296-1.1339)    |
| HISTORY OF, DRUGS ON MAINTENANCE THERAPY, HORMONE/STEROID             | 130                                     | 1024.588   | 4733                                       | 1420.2188     | 0.7214(0.6058-0.8591)    |

| Description                                                           | No. of Positive Cases with Disease Code | Case Rate* | No. of Positive Controls with Disease Code | Control Rate* | Relative Risk (95%CI)   |
|-----------------------------------------------------------------------|-----------------------------------------|------------|--------------------------------------------|---------------|-------------------------|
| HISTORY OF, DRUGS ON MAINTENANCE THERAPY, HYPOTENSIVE AGENT/DIAZOXIDE | 20                                      | 184.8499   | 638                                        | 283.1769      | 0.6528(0.4179-1.0196)   |
| HISTORY OF, DRUGS ON MAINTENANCE THERAPY, NOS                         | 110                                     | 1027.705   | 3040                                       | 1296.7655     | 0.7925(0.6549-0.959)    |
| HISTORY OF, FAMILY, ALZHEIMER'S DISEASE                               | 1                                       | 10.2447    | 19                                         | 9.8547        | 1.0396(0.1384-7.8103)   |
| HISTORY OF, FAMILY, ARTERIOSCLEROSIS                                  | 0                                       | 0          | 3                                          | 0.9608        | 0(0-Inf)                |
| HISTORY OF, FAMILY, ASTHMA                                            | 0                                       | 0          | 4                                          | 0.8839        | 0(0-Inf)                |
| HISTORY OF, FAMILY, CARDIOVASCULAR DISEASE                            | 2                                       | 14.0338    | 47                                         | 11.6812       | 1.2014(0.2905-4.9678)   |
| HISTORY OF, FAMILY, CEREBROVASCULAR DISEASE                           | 0                                       | 0          | 14                                         | 3.1838        | 0(0-Inf)                |
| HISTORY OF, FAMILY, CONGENITAL ANOMALY                                | 0                                       | 0          | 2                                          | 0.5069        | 0(0-Inf)                |
| HISTORY OF, FAMILY, CORONARY HEART DISEASE                            | 4                                       | 27.8013    | 424                                        | 106.6203      | 0.2608(0.0973-0.6985)   |
| HISTORY OF, FAMILY, DEMENTIA                                          | 0                                       | 0          | 36                                         | 19.371        | 0(0-Inf)                |
| HISTORY OF, FAMILY, DIABETES MELLITUS                                 | 0                                       | 0          | 102                                        | 27.3581       | 0(0-Inf)                |
| HISTORY OF, FAMILY, DISEASE, NEC                                      | 18                                      | 127.7324   | 599                                        | 162.5608      | 0.7858(0.4911-1.2572)   |
| HISTORY OF, FAMILY, DISEASE, NOS                                      | 0                                       | 0          | 32                                         | 7.7511        | 0(0-Inf)                |
| HISTORY OF, FAMILY, HODGKIN'S DISEASE                                 | 0                                       | 0          | 1                                          | 0.8529        | 0(0-Inf)                |
| HISTORY OF, FAMILY, HYPERTENSION                                      | 0                                       | 0          | 13                                         | 3.2914        | 0(0-Inf)                |
| HISTORY OF, FAMILY, KIDNEY DISEASE                                    | 1                                       | 7.6974     | 5                                          | 1.6509        | 4.6624(0.5326-40.8152)  |
| HISTORY OF, FAMILY, LEUKEMIA                                          | 0                                       | 0          | 2                                          | 0.468         | 0(0-Inf)                |
| HISTORY OF, FAMILY, MALIGNANT NEOPLASM OF BREAST                      | 14                                      | 98.0551    | 629                                        | 155.162       | 0.632(0.3717-1.0745)    |
| HISTORY OF, FAMILY, MALIGNANT NEOPLASM OF GENITAL ORGAN               | 12                                      | 87.3094    | 296                                        | 88.8458       | 0.9827(0.5509-1.7529)   |
| HISTORY OF, FAMILY, MALIGNANT NEOPLASM OF GI TRACT                    | 25                                      | 181.0507   | 1078                                       | 309.9218      | 0.5842(0.3927-0.8691)   |
| HISTORY OF, FAMILY, MALIGNANT NEOPLASM OF LUNG                        | 0                                       | 0          | 30                                         | 8.9845        | 0(0-Inf)                |
| HISTORY OF, FAMILY, MALIGNANT NEOPLASM OF THYROID                     | 0                                       | 0          | 4                                          | 1.1816        | 0(0-Inf)                |
| HISTORY OF, FAMILY, MALIGNANT NEOPLASM OF URINARY ORGAN               | 0                                       | 0          | 27                                         | 8.3518        | 0(0-Inf)                |
| HISTORY OF, FAMILY, MALIGNANT NEOPLASM, NEC                           | 2                                       | 14.1872    | 107                                        | 29.4006       | 0.4825(0.1189-1.9587)   |
| HISTORY OF, FAMILY, MALIGNANT NEOPLASM, NOS                           | 1                                       | 7.061      | 75                                         | 20.247        | 0.3487(0.0484-2.5132)   |
| HISTORY OF, FAMILY, MEDULLARY CA THYROID, NO DISEASE FOUND            | 0                                       | 0          | 1                                          | 0.405         | 0(0-Inf)                |
| HISTORY OF, FAMILY, MENTAL ILLNESS                                    | 0                                       | 0          | 4                                          | 1.4106        | 0(0-Inf)                |
| HISTORY OF, FAMILY, METABOLIC DISEASE, NEC                            | 0                                       | 0          | 3                                          | 0.8018        | 0(0-Inf)                |
| HISTORY OF, FAMILY, MULTIPLE MYELOMA                                  | 0                                       | 0          | 3                                          | 0.9608        | 0(0-Inf)                |
| HISTORY OF, FAMILY, MULTIPLE SCLEROSIS                                | 0                                       | 0          | 2                                          | 1.0783        | 0(0-Inf)                |
| HISTORY OF, FAMILY, NEUROLOGIC DISEASE                                | 1                                       | 9.2966     | 10                                         | 4.5067        | 2.0628(0.261-16.3054)   |
| HISTORY OF, FAMILY, STROKE                                            | 0                                       | 0          | 11                                         | 3.5029        | 0(0-Inf)                |
| HISTORY OF, INJURY, NOS                                               | 0                                       | 0          | 15                                         | 4.8514        | 0(0-Inf)                |
| HISTORY OF, MALIGNANCY, ABDOMEN                                       | 0                                       | 0          | 6                                          | 1.7648        | 0(0-Inf)                |
| HISTORY OF, MALIGNANCY, ADRENAL                                       | 1                                       | 6.8959     | 0                                          | 0             | 12243288685.4509(0-Inf) |

| Description                                                                                          | No. of Positive Cases with Disease Code | Case Rate* | No. of Positive Controls with Disease Code | Control Rate* | Relative Risk (95%CI)  |
|------------------------------------------------------------------------------------------------------|-----------------------------------------|------------|--------------------------------------------|---------------|------------------------|
| HISTORY OF, MALIGNANCY, ALVEOLAR PROCESS (JAW SOFT TISSUES)                                          | 0                                       | 0          | 5                                          | 4.7385        | 0(0-Inf)               |
| HISTORY OF, MALIGNANCY, AMPULLA OF VATER                                                             | 0                                       | 0          | 4                                          | 1.9295        | 0(0-Inf)               |
| HISTORY OF, MALIGNANCY, APPENDIX                                                                     | 0                                       | 0          | 6                                          | 1.9494        | 0(0-Inf)               |
| HISTORY OF, MALIGNANCY, BILE DUCT                                                                    | 0                                       | 0          | 3                                          | 0.741         | 0(0-Inf)               |
| HISTORY OF, MALIGNANCY, BLADDER--HXBL                                                                | 14                                      | 153.9793   | 257                                        | 145.0268      | 1.0617(0.6192-1.8206)  |
| HISTORY OF, MALIGNANCY, BONE SARCOMAS (EWING'S)                                                      | 0                                       | 0          | 6                                          | 1.5146        | 0(0-Inf)               |
| HISTORY OF, MALIGNANCY, BONE--HXBO                                                                   | 0                                       | 0          | 8                                          | 2.4469        | 0(0-Inf)               |
| HISTORY OF, MALIGNANCY, BREAST--HXBR                                                                 | 29                                      | 213.9027   | 910                                        | 246.5631      | 0.8675(0.5987-1.257)   |
| HISTORY OF, MALIGNANCY, BRONCHUS                                                                     | 0                                       | 0          | 8                                          | 2.1735        | 0(0-Inf)               |
| HISTORY OF, MALIGNANCY, CARDIA                                                                       | 0                                       | 0          | 5                                          | 2.4584        | 0(0-Inf)               |
| HISTORY OF, MALIGNANCY, CERVIX UTERI--HXCX                                                           | 8                                       | 157.0041   | 158                                        | 75.0679       | 2.0915(1.025-4.2675)   |
| HISTORY OF, MALIGNANCY, COLORECTAL                                                                   | 0                                       | 0          | 33                                         | 15.2126       | 0(0-Inf)               |
| HISTORY OF, MALIGNANCY, CONNECTIVE TISSUE --HXCT                                                     | 0                                       | 0          | 29                                         | 8.4719        | 0(0-Inf)               |
| HISTORY OF, MALIGNANCY, DIGESTIVE SYSTEM, NEC                                                        | 0                                       | 0          | 2                                          | 0.5709        | 0(0-Inf)               |
| HISTORY OF, MALIGNANCY, DUODENUM                                                                     | 0                                       | 0          | 4                                          | 1.3629        | 0(0-Inf)               |
| HISTORY OF, MALIGNANCY, EAR (MIDDLE), NOS                                                            | 0                                       | 0          | 1                                          | 0.3526        | 0(0-Inf)               |
| HISTORY OF, MALIGNANCY, ESOPHAGOGASTRIC JUNCTION                                                     | 0                                       | 0          | 5                                          | 2.97          | 0(0-Inf)               |
| HISTORY OF, MALIGNANCY, ESOPHAGUS                                                                    | 1                                       | 9.2517     | 25                                         | 11.2271       | 0.8241(0.1112-6.1074)  |
| HISTORY OF, MALIGNANCY, EYE (LACRIMAL GLAND)                                                         | 1                                       | 7.9045     | 10                                         | 3.4931        | 2.2629(0.2863-17.8824) |
| HISTORY OF, MALIGNANCY, EYELID                                                                       | 1                                       | 10.8244    | 26                                         | 14.817        | 0.7305(0.0987-5.4057)  |
| HISTORY OF, MALIGNANCY, FALLOPIAN TUBE                                                               | 0                                       | 0          | 6                                          | 1.6237        | 0(0-Inf)               |
| HISTORY OF, MALIGNANCY, FLOOR OF MOUTH                                                               | 0                                       | 0          | 9                                          | 5.1638        | 0(0-Inf)               |
| HISTORY OF, MALIGNANCY, GALLBLADDER                                                                  | 0                                       | 0          | 5                                          | 1.2652        | 0(0-Inf)               |
| HISTORY OF, MALIGNANCY, GENITAL ORGAN, FEMALE, NOS                                                   | 0                                       | 0          | 1                                          | 0.2354        | 0(0-Inf)               |
| HISTORY OF, MALIGNANCY, GENITAL ORGAN, MALE, NEC                                                     | 0                                       | 0          | 2                                          | 0.4854        | 0(0-Inf)               |
| HISTORY OF, MALIGNANCY, GENITOURINARY ORGAN, NOS                                                     | 0                                       | 0          | 1                                          | 2.4858        | 0(0-Inf)               |
| HISTORY OF, MALIGNANCY, GLOTTIS / SUBGLOTTIC / ARYTENOID                                             | 0                                       | 0          | 6                                          | 3.805         | 0(0-Inf)               |
| HISTORY OF, MALIGNANCY, GUM                                                                          | 0                                       | 0          | 4                                          | 3.7346        | 0(0-Inf)               |
| HISTORY OF, MALIGNANCY, HEAD-NECK, NEC                                                               | 1                                       | 9.2685     | 37                                         | 16.5436       | 0.5602(0.0766-4.0962)  |
| HISTORY OF, MALIGNANCY, HODGKIN'S DISEASE                                                            | 0                                       | 0          | 14                                         | 3.4681        | 0(0-Inf)               |
| HISTORY OF, MALIGNANCY, HYPOPHARYNX                                                                  | 0                                       | 0          | 2                                          | 0.7052        | 0(0-Inf)               |
| HISTORY OF, MALIGNANCY, KIDNEY--HXKD                                                                 | 6                                       | 57.6174    | 123                                        | 57.6948       | 0.9987(0.4392-2.2706)  |
| HISTORY OF, MALIGNANCY, LARGE INTESTINE (CECUM, ASCENDING, DESCENDING, TRANSVERSE, SIGMOID, ILEOCECA | 28                                      | 276.0891   | 454                                        | 216.3721      | 1.276(0.87-1.8714)     |
| HISTORY OF, MALIGNANCY, LARYNX                                                                       | 2                                       | 18.3999    | 34                                         | 15.2237       | 1.2086(0.2892-5.0505)  |
| HISTORY OF, MALIGNANCY, LEUKEMIA                                                                     | 1                                       | 7.9772     | 19                                         | 6.7285        | 1.1856(0.1577-8.9143)  |
| HISTORY OF, MALIGNANCY, LIP                                                                          | 1                                       | 9.4093     | 23                                         | 10.5034       | 0.8958(0.1204-6.6665)  |
| HISTORY OF, MALIGNANCY, LIP, SKIN                                                                    | 2                                       | 18.9177    | 33                                         | 15.206        | 1.2441(0.297-5.2112)   |

| Description                                                           | No. of Positive Cases with Disease Code | Case Rate* | No. of Positive Controls with Disease Code | Control Rate* | Relative Risk (95%CI)   |
|-----------------------------------------------------------------------|-----------------------------------------|------------|--------------------------------------------|---------------|-------------------------|
| HISTORY OF, MALIGNANCY, LIVER                                         | 2                                       | 14.4777    | 4                                          | 1.15          | 12.5898(2.2313-71.0369) |
| HISTORY OF, MALIGNANCY, LUNG--HXLU                                    | 11                                      | 91.4748    | 236                                        | 88.619        | 1.0322(0.5629-1.8928)   |
| HISTORY OF, MALIGNANCY, LYMPHATIC STRUCTURES                          | 0                                       | 0          | 1                                          | 0.8877        | 0(0-Inf)                |
| HISTORY OF, MALIGNANCY, LYMPHOMA                                      | 5                                       | 43.2305    | 98                                         | 39.0925       | 1.1059(0.4489-2.7243)   |
| HISTORY OF, MALIGNANCY, MEDIASTINUM                                   | 0                                       | 0          | 1                                          | 0.4751        | 0(0-Inf)                |
| HISTORY OF, MALIGNANCY, MELANOMA OF SKIN                              | 10                                      | 81.5783    | 224                                        | 81.6966       | 0.9986(0.529-1.8848)    |
| HISTORY OF, MALIGNANCY, MOUTH, NEC                                    | 0                                       | 0          | 23                                         | 9.5454        | 0(0-Inf)                |
| HISTORY OF, MALIGNANCY, MULTIPLE MYELOMA                              | 1                                       | 11.6879    | 0                                          | 0             | 8831763468.0662(0-Inf)  |
| HISTORY OF, MALIGNANCY, NASAL CAVITIES                                | 0                                       | 0          | 2                                          | 0.7051        | 0(0-Inf)                |
| HISTORY OF, MALIGNANCY, NASAL VESTIBULE                               | 0                                       | 0          | 1                                          | 0.3526        | 0(0-Inf)                |
| HISTORY OF, MALIGNANCY, NASOPHARYNX                                   | 0                                       | 0          | 3                                          | 0.9166        | 0(0-Inf)                |
| HISTORY OF, MALIGNANCY, NOS                                           | 1                                       | 8.4286     | 47                                         | 18.0455       | 0.4671(0.0643-3.395)    |
| HISTORY OF, MALIGNANCY, NOSE (NOT SKIN)                               | 0                                       | 0          | 6                                          | 3.5928        | 0(0-Inf)                |
| HISTORY OF, MALIGNANCY, OROPHARYNX                                    | 0                                       | 0          | 17                                         | 5.818         | 0(0-Inf)                |
| HISTORY OF, MALIGNANCY, OVARY                                         | 5                                       | 69.1991    | 97                                         | 45.3787       | 1.5249(0.618-3.7629)    |
| HISTORY OF, MALIGNANCY, PALATE/UVULA                                  | 0                                       | 0          | 7                                          | 2.2461        | 0(0-Inf)                |
| HISTORY OF, MALIGNANCY, PANCREAS                                      | 2                                       | 16.608     | 20                                         | 7.484         | 2.2191(0.5142-9.5773)   |
| HISTORY OF, MALIGNANCY, PAROTID/SUBMAXILLARY GLAND                    | 0                                       | 0          | 16                                         | 7.8777        | 0(0-Inf)                |
| HISTORY OF, MALIGNANCY, PELVIC WALL/PELVIC, NEC/NOS                   | 0                                       | 0          | 3                                          | 0.9774        | 0(0-Inf)                |
| HISTORY OF, MALIGNANCY, PENIS                                         | 0                                       | 0          | 9                                          | 3.4521        | 0(0-Inf)                |
| HISTORY OF, MALIGNANCY, PERITONEUM                                    | 0                                       | 0          | 5                                          | 1.5646        | 0(0-Inf)                |
| HISTORY OF, MALIGNANCY, PHARYNX, EXCLUDING LARYNX                     | 1                                       | 7.586      | 7                                          | 2.3109        | 3.2827(0.3979-27.0801)  |
| HISTORY OF, MALIGNANCY, PHEOCHROMOCYTOMA                              | 0                                       | 0          | 3                                          | 0.7885        | 0(0-Inf)                |
| HISTORY OF, MALIGNANCY, PLEURA                                        | 0                                       | 0          | 1                                          | 0.8528        | 0(0-Inf)                |
| HISTORY OF, MALIGNANCY, PROSTATE--HXPR                                | 43                                      | 495.129    | 824                                        | 489.6545      | 1.0112(0.7436-1.375)    |
| HISTORY OF, MALIGNANCY, PYRIFORM SINUS/FOSSA                          | 0                                       | 0          | 1                                          | 0.3526        | 0(0-Inf)                |
| HISTORY OF, MALIGNANCY, RECTUM                                        | 1                                       | 9.4709     | 119                                        | 55.1774       | 0.1716(0.024-1.2297)    |
| HISTORY OF, MALIGNANCY, RETROPERITONEAL                               | 0                                       | 0          | 1                                          | 0.405         | 0(0-Inf)                |
| HISTORY OF, MALIGNANCY, SALIVARY GLAND                                | 0                                       | 0          | 13                                         | 3.6563        | 0(0-Inf)                |
| HISTORY OF, MALIGNANCY, SINUS                                         | 0                                       | 0          | 2                                          | 0.7896        | 0(0-Inf)                |
| HISTORY OF, MALIGNANCY, SKIN, EXCEPT MELANOMA--HXSK                   | 97                                      | 964.1786   | 2369                                       | 1098.5588     | 0.8777(0.716-1.0758)    |
| HISTORY OF, MALIGNANCY, SMALL INTESTINE (ILEUM/JEJUNUM)               | 0                                       | 0          | 11                                         | 3.4475        | 0(0-Inf)                |
| HISTORY OF, MALIGNANCY, SOFT TISSUE                                   | 0                                       | 0          | 12                                         | 2.8058        | 0(0-Inf)                |
| HISTORY OF, MALIGNANCY, STOMACH                                       | 4                                       | 39.1582    | 26                                         | 12.5905       | 3.1101(1.077-8.9816)    |
| HISTORY OF, MALIGNANCY, TESTIS                                        | 1                                       | 17.9479    | 15                                         | 8.792         | 2.0414(0.2679-15.5529)  |
| HISTORY OF, MALIGNANCY, THYMUS (THYMOMA)                              | 0                                       | 0          | 4                                          | 1.0274        | 0(0-Inf)                |
| HISTORY OF, MALIGNANCY, THYROID GLAND--HXTH                           | 4                                       | 28.3981    | 75                                         | 17.364        | 1.6355(0.5954-4.4925)   |
| HISTORY OF, MALIGNANCY, TONGUE                                        | 1                                       | 9.06       | 25                                         | 10.7692       | 0.8413(0.1134-6.2398)   |
| HISTORY OF, MALIGNANCY, TONSIL/EPIGLOTTIS/SUPRA-<br>GLOTTIS/VALLECULA | 1                                       | 8.1448     | 25                                         | 9.1982        | 0.8855(0.1194-6.5665)   |



| Description                                                           | No. of Positive Cases with Disease Code | Case Rate* | No. of Positive Controls with Disease Code | Control Rate* | Relative Risk (95%CI)  |
|-----------------------------------------------------------------------|-----------------------------------------|------------|--------------------------------------------|---------------|------------------------|
| HISTORY OF, MALIGNANCY, TRACHEA                                       | 0                                       | 0          | 3                                          | 0.746         | 0(0-Inf)               |
| HISTORY OF, MALIGNANCY, URETER                                        | 2                                       | 23.2376    | 18                                         | 11.0926       | 2.0949(0.4829-9.0874)  |
| HISTORY OF, MALIGNANCY, URETHRA                                       | 0                                       | 0          | 6                                          | 3.025         | 0(0-Inf)               |
| HISTORY OF, MALIGNANCY, URINARY ORGAN, NEC                            | 0                                       | 0          | 10                                         | 6.7381        | 0(0-Inf)               |
| HISTORY OF, MALIGNANCY, UTERUS (ENDOMETRIUM/HYDATID MOLE, ETC.)--HXUT | 4                                       | 55.7705    | 139                                        | 70.0999       | 0.7956(0.2936-2.1556)  |
| HISTORY OF, MALIGNANCY, VAGINA                                        | 2                                       | 27.8043    | 13                                         | 6.3969        | 4.3465(0.964-19.5982)  |
| HISTORY OF, MALIGNANCY, VULVA                                         | 1                                       | 15.2756    | 18                                         | 11.6669       | 1.3093(0.1732-9.8953)  |
| HISTORY OF, MEDICINAL AGENTS                                          | 0                                       | 0          | 5                                          | 1.3717        | 0(0-Inf)               |
| HISTORY OF, MELANOMA EYE                                              | 1                                       | 7.4679     | 4                                          | 1.2607        | 5.9236(0.6453-54.3739) |
| HISTORY OF, MENTAL DISORDER                                           | 0                                       | 0          | 3                                          | 0.6986        | 0(0-Inf)               |
| HISTORY OF, NARCOTIC OR OTHER HABIT-FORMING DRUG USE                  | 1                                       | 13.6074    | 10                                         | 7.6821        | 1.7713(0.2251-13.9414) |
| HISTORY OF, NEURILEMMOMA/NEUROMA (ACOUSTIC) (AUDITORY)                | 0                                       | 0          | 11                                         | 3.0569        | 0(0-Inf)               |
| HISTORY OF, PITUITARY ADENOMA                                         | 0                                       | 0          | 21                                         | 9.7476        | 0(0-Inf)               |
| HISTORY OF, PLASMACYTOMA                                              | 0                                       | 0          | 2                                          | 0.5709        | 0(0-Inf)               |
| HISTORY OF, RADIATION, HEAD OR NECK, GIVEN IN CHILDHOOD               | 0                                       | 0          | 7                                          | 2.5378        | 0(0-Inf)               |
| HISTORY OF, RADIATION, HEAD OR NECK, NOS                              | 1                                       | 7.3663     | 113                                        | 34.5286       | 0.2133(0.0298-1.5296)  |
| HISTORY OF, RADIATION, NOS                                            | 21                                      | 193.7111   | 658                                        | 293.0459      | 0.661(0.4277-1.0216)   |
| HISTORY OF, RADIATION, NOS, GIVEN IN CHILDHOOD                        | 0                                       | 0          | 6                                          | 1.5709        | 0(0-Inf)               |
| HISTORY OF, SCHWANNOMA                                                | 0                                       | 0          | 3                                          | 0.9165        | 0(0-Inf)               |
| HISTORY OF, TOBACCO USE, NEC                                          | 11                                      | 85.3894    | 313                                        | 105.3318      | 0.8107(0.4438-1.481)   |
| HISTORY OF, TUBERCULOSIS, NOS                                         | 5                                       | 41.944     | 63                                         | 23.7583       | 1.7654(0.7069-4.4089)  |
| HISTORY OF, TUBERCULOSIS, PULMONARY                                   | 3                                       | 21.959     | 41                                         | 12.0041       | 1.8293(0.563-5.9442)   |
| HISTORY OF, TUMOR, BRAIN--HXBN                                        | 3                                       | 21.4987    | 60                                         | 16.8168       | 1.2784(0.3991-4.0945)  |
| HISTORY OF, TUMOR, SPINAL CORD--HXSC                                  | 1                                       | 8.1494     | 17                                         | 6.1621        | 1.3225(0.1746-10.0167) |
| HISTORY OF, ULCER, GASTRIC (DUODENAL, PEPTIC)--HXGU                   | 28                                      | 232.1935   | 704                                        | 260.0334      | 0.8929(0.6114-1.3041)  |
| HIVES (SEE ALSO URTICARIA)                                            | 4                                       | 27.858     | 117                                        | 28.7067       | 0.9704(0.3572-2.6365)  |
| HOARSENESS, NOS                                                       | 30                                      | 253.4148   | 726                                        | 273.1419      | 0.9278(0.6433-1.338)   |
| HOARSENESS, PSYCHOGENIC                                               | 0                                       | 0          | 4                                          | 1.2149        | 0(0-Inf)               |
| HOLE, LAMELLAR (EYE)                                                  | 0                                       | 0          | 7                                          | 2.1545        | 0(0-Inf)               |
| HOLE, MACULAR                                                         | 6                                       | 45.4877    | 142                                        | 44.6929       | 1.0178(0.4485-2.3099)  |
| HOLE, RETINAL                                                         | 4                                       | 29.1255    | 127                                        | 37.2072       | 0.7828(0.2887-2.1228)  |
| HOLE, ROUND, RETINA                                                   | 0                                       | 0          | 3                                          | 0.9609        | 0(0-Inf)               |
| HOLTER MONITORING                                                     | 1                                       | 9.5451     | 30                                         | 14.0037       | 0.6816(0.0926-5.0176)  |
| HOME PARENTERAL NUTRITION--HPN                                        | 1                                       | 8.8853     | 11                                         | 4.6106        | 1.9271(0.246-15.0985)  |
| HOMOCYSTEINEMIA                                                       | 0                                       | 0          | 30                                         | 13.1798       | 0(0-Inf)               |
| HORDEOLUM, LID, EXTERNAL                                              | 9                                       | 73.6424    | 210                                        | 52.0385       | 1.4152(0.7246-2.7639)  |
| HORDEOLUM, LID, INTERNAL                                              | 0                                       | 0          | 85                                         | 20.7324       | 0(0-Inf)               |
| HORDEOLUM, NOS                                                        | 5                                       | 37.3436    | 178                                        | 55.1272       | 0.6774(0.278-1.6505)   |

| Description                                       | No. of Positive Cases with Disease Code | Case Rate* | No. of Positive Controls with Disease Code | Control Rate* | Relative Risk (95%CI)   |
|---------------------------------------------------|-----------------------------------------|------------|--------------------------------------------|---------------|-------------------------|
| HORN, CUTANEOUS                                   | 14                                      | 134.0752   | 223                                        | 103.6299      | 1.2938(0.7525-2.2243)   |
| HORN, NAIL, NOS                                   | 0                                       | 0          | 2                                          | 0.5069        | 0(0-Inf)                |
| HORSESHOE KIDNEY (CONGENITAL)                     | 1                                       | 6.9072     | 10                                         | 2.6157        | 2.6407(0.3339-20.8819)  |
| HOT FLASHES, FEMALE                               | 7                                       | 51.7718    | 486                                        | 107.5685      | 0.4813(0.228-1.016)     |
| HOT FLASHES, MALE                                 | 0                                       | 0          | 40                                         | 27.8122       | 0(0-Inf)                |
| HOUSEMAID'S KNEE                                  | 0                                       | 0          | 3                                          | 0.8456        | 0(0-Inf)                |
| HUDSON-STAHLI LINE                                | 0                                       | 0          | 1                                          | 0.234         | 0(0-Inf)                |
| HUMAN PAPILLOMA VIRUS-HPV                         | 4                                       | 65.6825    | 43                                         | 18.8624       | 3.4822(1.2401-9.7779)   |
| HUNCHBACK SEE ALSO KYPHOSIS                       | 0                                       | 0          | 1                                          | 0.2354        | 0(0-Inf)                |
| HYALINOSIS RENAL (KIDNEY)                         | 0                                       | 0          | 2                                          | 0.7052        | 0(0-Inf)                |
| HYALITIS (ASTEROID)                               | 6                                       | 59.6755    | 91                                         | 44.9478       | 1.3277(0.5795-3.042)    |
| HYDATID, MOLE, NOS                                | 0                                       | 0          | 1                                          | 0.398         | 0(0-Inf)                |
| HYDRADENITIS, NOS                                 | 2                                       | 13.9088    | 5                                          | 1.356         | 10.2571(1.9426-54.1597) |
| HYDRADENITIS, SUPPURATIVE                         | 0                                       | 0          | 4                                          | 1.3628        | 0(0-Inf)                |
| HYDRARTHROSIS, LOWER EXTREMITY                    | 0                                       | 0          | 1                                          | 0.2729        | 0(0-Inf)                |
| HYDROCELE, INFECTED                               | 0                                       | 0          | 1                                          | 0.2729        | 0(0-Inf)                |
| HYDROCELE, INGUINAL                               | 0                                       | 0          | 2                                          | 0.7052        | 0(0-Inf)                |
| HYDROCELE, NOS                                    | 15                                      | 118.0279   | 273                                        | 94.9123       | 1.2435(0.7385-2.094)    |
| HYDROCELE, SCROTAL                                | 2                                       | 29.1623    | 44                                         | 27.9442       | 1.0436(0.2522-4.3186)   |
| HYDROCELE, SPERMATIC CORD                         | 0                                       | 0          | 1                                          | 0.3527        | 0(0-Inf)                |
| HYDROCELE, TESTICLE                               | 2                                       | 30.4144    | 33                                         | 22.572        | 1.3474(0.3221-5.6373)   |
| HYDROCEPHALUS, COMMUNICATING                      | 1                                       | 7.9401     | 24                                         | 8.2915        | 0.9576(0.1288-7.1213)   |
| HYDROCEPHALUS, NORMAL PRESSURE                    | 1                                       | 14.1025    | 38                                         | 30.6013       | 0.4608(0.0631-3.3635)   |
| HYDROCEPHALUS, NOS                                | 1                                       | 8.4433     | 33                                         | 12.7781       | 0.6608(0.09-4.8496)     |
| HYDROCEPHALUS, OBSTRUCTIVE                        | 0                                       | 0          | 8                                          | 1.9751        | 0(0-Inf)                |
| HYDROCEPHALUS, OCCULT                             | 0                                       | 0          | 1                                          | 0.2354        | 0(0-Inf)                |
| HYDROCYSTOMA, (CODE ALSO NEOPLASM BENIGN BY SITE) | 0                                       | 0          | 7                                          | 1.6622        | 0(0-Inf)                |
| HYDROMA, CNS                                      | 0                                       | 0          | 5                                          | 2.2774        | 0(0-Inf)                |
| HYDROMETRA                                        | 0                                       | 0          | 5                                          | 1.7734        | 0(0-Inf)                |
| HYDRONEPHRITIS                                    | 0                                       | 0          | 1                                          | 0.398         | 0(0-Inf)                |
| HYDRONEPHROSIS, CONGENITAL                        | 0                                       | 0          | 1                                          | 0.2354        | 0(0-Inf)                |
| HYDRONEPHROSIS, NOS                               | 3                                       | 31.4426    | 98                                         | 52.4579       | 0.5994(0.1897-1.8943)   |
| HYDROPNEUMOTHORAX, NOS                            | 1                                       | 9.2277     | 13                                         | 5.7871        | 1.5945(0.2069-12.2887)  |
| HYDROPS, COCHLEAR / VESTIBULAR                    | 1                                       | 7.771      | 27                                         | 6.5684        | 1.1831(0.1598-8.7575)   |
| HYDROPS, EAR, NOS                                 | 0                                       | 0          | 5                                          | 1.1772        | 0(0-Inf)                |
| HYDROPS, ENDOLYMPHATIC                            | 2                                       | 13.8768    | 42                                         | 10.581        | 1.3115(0.3158-5.4457)   |
| HYDROPS, GALLBLADDER                              | 3                                       | 23.671     | 27                                         | 6.0948        | 3.8838(1.1657-12.9403)  |
| HYDROPS, JOINT                                    | 0                                       | 0          | 1                                          | 0.3527        | 0(0-Inf)                |
| HYDROPS, KERATOCONUS                              | 0                                       | 0          | 1                                          | 0.8273        | 0(0-Inf)                |
| HYDROPS, LABYRINTH                                | 1                                       | 8.7149     | 5                                          | 1.3252        | 6.5763(0.7511-57.5814)  |

| Description                                      | No. of Positive Cases with Disease Code | Case Rate* | No. of Positive Controls with Disease Code | Control Rate* | Relative Risk (95%CI)    |
|--------------------------------------------------|-----------------------------------------|------------|--------------------------------------------|---------------|--------------------------|
| HYDROPS, NOS (CV SYSTEM)                         | 0                                       | 0          | 1                                          | 0.888         | 0(0-Inf)                 |
| HYDROSALPINX, NOS                                | 0                                       | 0          | 26                                         | 13.0958       | 0(0-Inf)                 |
| HYDROSALPINX, P.O.                               | 0                                       | 0          | 1                                          | 0.398         | 0(0-Inf)                 |
| HYDROTHORAX, NOS                                 | 0                                       | 0          | 4                                          | 1.6243        | 0(0-Inf)                 |
| HYDROURETER                                      | 0                                       | 0          | 8                                          | 2.0619        | 0(0-Inf)                 |
| HYDROURETERONEPHROSIS                            | 0                                       | 0          | 15                                         | 7.4246        | 0(0-Inf)                 |
| HYGROMA, NOS, CODE ALSO LYMPHANGIOMA BY SITE     | 0                                       | 0          | 10                                         | 4.559         | 0(0-Inf)                 |
| HYMENOLEPIASIS                                   | 0                                       | 0          | 1                                          | 0.398         | 0(0-Inf)                 |
| HYPER AS AN EYE DIAGNOSIS, NOT FURTHER SPECIFIED | 1                                       | 11.5034    | 2                                          | 1.2425        | 9.2579(0.8137-105.3325)  |
| HYPERACIDITY (GASTRIC)                           | 1                                       | 7.9156     | 36                                         | 8.7275        | 0.907(0.1238-6.6458)     |
| HYPERACTIVE, ADULT                               | 1                                       | 7.2875     | 3                                          | 0.7192        | 10.1333(1.0161-101.0522) |
| HYPERACTIVE, BOWEL SOUNDS                        | 0                                       | 0          | 2                                          | 1.1619        | 0(0-Inf)                 |
| HYPERACTIVE, BRONCHUS                            | 1                                       | 7.1969     | 6                                          | 1.7208        | 4.1823(0.4928-35.4911)   |
| HYPERACTIVE, CHILD OR ADOLESCENT                 | 1                                       | 7.6164     | 1                                          | 0.2398        | 31.7566(1.8707-539.0887) |
| HYPERACTIVE, GAG REFLEX                          | 0                                       | 0          | 2                                          | 0.5709        | 0(0-Inf)                 |
| HYPERACTIVE, GASTROINTESTINAL                    | 0                                       | 0          | 3                                          | 0.7065        | 0(0-Inf)                 |
| HYPERACTIVE, LABYRINTH                           | 1                                       | 7.7048     | 1                                          | 0.3295        | 23.3831(1.3854-394.6599) |
| HYPERACUSIS                                      | 0                                       | 0          | 7                                          | 1.6868        | 0(0-Inf)                 |
| HYPERALBUMINEMIA                                 | 0                                       | 0          | 3                                          | 1.5755        | 0(0-Inf)                 |
| HYPERALDOSTERONISM, NOS                          | 0                                       | 0          | 18                                         | 6.0082        | 0(0-Inf)                 |
| HYPERALDOSTERONISM, PRIMARY                      | 1                                       | 8.0582     | 17                                         | 6.0658        | 1.3285(0.1755-10.0582)   |
| HYPERALDOSTERONISM, SECONDARY                    | 0                                       | 0          | 2                                          | 0.5709        | 0(0-Inf)                 |
| HYPERALGESIA                                     | 0                                       | 0          | 3                                          | 0.9608        | 0(0-Inf)                 |
| HYPERALPHALIPOPROTEINEMIA                        | 0                                       | 0          | 1                                          | 0.2354        | 0(0-Inf)                 |
| HYPERAMMONEMIA                                   | 0                                       | 0          | 2                                          | 0.5709        | 0(0-Inf)                 |
| HYPERANDROGENISM                                 | 0                                       | 0          | 1                                          | 0.2354        | 0(0-Inf)                 |
| HYPERBILIRUBINEMIA, NEWBORN                      | 0                                       | 0          | 7                                          | 6.6343        | 0(0-Inf)                 |
| HYPERBILIRUBINEMIA, NOS                          | 0                                       | 0          | 44                                         | 11.3201       | 0(0-Inf)                 |
| HYPERCALCEMIA, FAMILIAL BENIGN                   | 0                                       | 0          | 12                                         | 2.7195        | 0(0-Inf)                 |
| HYPERCALCEMIA, MALIGNANT HHM (HUMORAL)           | 0                                       | 0          | 1                                          | 0.2354        | 0(0-Inf)                 |
| HYPERCALCEMIA, NOS                               | 40                                      | 297.5405   | 736                                        | 214.9268      | 1.3844(1.0057-1.9057)    |
| HYPERCALCIURIA                                   | 1                                       | 8.3362     | 73                                         | 18.6088       | 0.448(0.0621-3.2301)     |
| HYPERCAPNIA                                      | 2                                       | 19.9963    | 38                                         | 19.0154       | 1.0516(0.2526-4.3775)    |
| HYPERCARBIA                                      | 0                                       | 0          | 9                                          | 8.4731        | 0(0-Inf)                 |
| HYPERCHOLESTEREMIA                               | 5                                       | 39.3812    | 335                                        | 114.3161      | 0.3445(0.1423-0.8339)    |
| HYPERCHOLESTEROLEMIA, FAMILIAL                   | 0                                       | 0          | 23                                         | 5.5531        | 0(0-Inf)                 |
| HYPERCHOLESTEROLEMIA, NOS--HCLS                  | 68                                      | 501.2179   | 2835                                       | 782.3752      | 0.6406(0.5034-0.8152)    |
| HYPERCHOLESTEROLEMIA, TYPE 2                     | 0                                       | 0          | 17                                         | 4.3307        | 0(0-Inf)                 |
| HYPERCOAGULATION (FAMILIAL)                      | 2                                       | 17.1012    | 17                                         | 6.6959        | 2.554(0.5846-11.1583)    |
| HYPERCORTICOLISM, EXOGENOUS                      | 1                                       | 7.6754     | 8                                          | 2.615         | 2.9352(0.3614-23.8419)   |

| Description                                                 | No. of Positive Cases with Disease Code | Case Rate* | No. of Positive Controls with Disease Code | Control Rate* | Relative Risk (95%CI)  |
|-------------------------------------------------------------|-----------------------------------------|------------|--------------------------------------------|---------------|------------------------|
| HYPERCORTICOLISM, NOS                                       | 0                                       | 0          | 2                                          | 0.7896        | 0(0-Inf)               |
| HYPERCORTICOSTERONISM, EXOGENOUS                            | 0                                       | 0          | 2                                          | 0.4854        | 0(0-Inf)               |
| HYPERCORTICOSTERONISM, NOS                                  | 0                                       | 0          | 1                                          | 1.0362        | 0(0-Inf)               |
| HYPERCORTISONISM, EXOGENOUS                                 | 0                                       | 0          | 11                                         | 3.9628        | 0(0-Inf)               |
| HYPERCORTISONISM, NOS                                       | 0                                       | 0          | 13                                         | 4.0128        | 0(0-Inf)               |
| HYPERDYNAMIC, HEART                                         | 2                                       | 15.7829    | 21                                         | 7.1463        | 2.2085(0.5129-9.5105)  |
| HYPERDYNAMIC, STATE                                         | 1                                       | 7.2108     | 0                                          | 0             | 12750916585.508(0-Inf) |
| HYPEREMESIS, NOS                                            | 0                                       | 0          | 2                                          | 0.8096        | 0(0-Inf)               |
| HYPEREMIA, CONJUNCTIVA                                      | 0                                       | 0          | 3                                          | 1.3473        | 0(0-Inf)               |
| HYPEREMIA, EYE                                              | 0                                       | 0          | 1                                          | 0.8881        | 0(0-Inf)               |
| HYPEREMIA, NOS (SEE ALSO CONGESTION)                        | 1                                       | 10.875     | 5                                          | 2.8174        | 3.8599(0.4435-33.5965) |
| HYPEREMIA, STOMACH                                          | 0                                       | 0          | 1                                          | 0.3526        | 0(0-Inf)               |
| HYPEREOSINOPHILIA                                           | 1                                       | 7.0837     | 4                                          | 1.128         | 6.2796(0.6834-57.7043) |
| HYPERESTHESIA                                               | 3                                       | 21.9226    | 25                                         | 7.3029        | 3.0019(0.8978-10.0372) |
| HYPERESTROGENISM, NOS                                       | 0                                       | 0          | 1                                          | 0.2354        | 0(0-Inf)               |
| HYPEREXODEVIATION                                           | 1                                       | 22.2988    | 3                                          | 4.3558        | 5.1193(0.5268-49.7476) |
| HYPEREXTENSION (SEE ALSO SPRAIN BY SITE)                    | 0                                       | 0          | 2                                          | 1.1974        | 0(0-Inf)               |
| HYPERGAMMAGLOBULINEMIA                                      | 2                                       | 14.4342    | 12                                         | 3.443         | 4.1923(0.9245-19.0105) |
| HYPERGLOBULINEMIA                                           | 0                                       | 0          | 1                                          | 0.3526        | 0(0-Inf)               |
| HYPERGLYCEMIA, BORDERLINE                                   | 2                                       | 16.8189    | 31                                         | 12.0298       | 1.3981(0.333-5.8705)   |
| HYPERGLYCEMIA, NOS, SEE ALSO DIABETES MELLITUS              | 48                                      | 386.8571   | 1871                                       | 647.7372      | 0.5972(0.4482-0.7958)  |
| HYPERGLYCINEMIA (SEE ALSO DIABETES)                         | 1                                       | 7.3744     | 13                                         | 4.0207        | 1.8341(0.2376-14.1551) |
| HYPERGONADISM, MALE                                         | 0                                       | 0          | 13                                         | 18.2668       | 0(0-Inf)               |
| HYPERHIDROSIS                                               | 3                                       | 25.0554    | 52                                         | 12.6238       | 1.9848(0.6165-6.3895)  |
| HYPERHISTAMINEMIA (CRISIS) (PHENOMENA)                      | 0                                       | 0          | 1                                          | 0.3526        | 0(0-Inf)               |
| HYPERINFLATION CHEST                                        | 0                                       | 0          | 8                                          | 2.6452        | 0(0-Inf)               |
| HYPERINSULINISM, NOS                                        | 0                                       | 0          | 1                                          | 0.3526        | 0(0-Inf)               |
| HYPERKALEMIA                                                | 41                                      | 528.9057   | 832                                        | 595.9871      | 0.8874(0.6481-1.2151)  |
| HYPERKERATOSIS, CERVIX                                      | 0                                       | 0          | 36                                         | 17.2077       | 0(0-Inf)               |
| HYPERKERATOSIS, EPIDERMOLYTIC                               | 0                                       | 0          | 10                                         | 2.4314        | 0(0-Inf)               |
| HYPERKERATOSIS, GENITAL (SKIN), NEC                         | 2                                       | 13.9266    | 56                                         | 13.0418       | 1.0678(0.2594-4.3963)  |
| HYPERKERATOSIS, LARYNX                                      | 1                                       | 6.961      | 19                                         | 5.468         | 1.273(0.1695-9.5617)   |
| HYPERKERATOSIS, NOS, SKIN (SEE ALSO KERATOSIS/DYSKERATOSIS) | 14                                      | 98.598     | 376                                        | 98.9402       | 0.9965(0.5836-1.7016)  |
| HYPERKERATOSIS, ORAL                                        | 0                                       | 0          | 53                                         | 21.9099       | 0(0-Inf)               |
| HYPERKERATOSIS, TONGUE                                      | 2                                       | 13.9577    | 33                                         | 8.7641        | 1.5926(0.3798-6.6782)  |
| HYPERKERATOSIS, VAGINA                                      | 2                                       | 30.9926    | 19                                         | 8.2307        | 3.7655(0.8658-16.3764) |
| HYPERKINESIA                                                | 1                                       | 7.3468     | 4                                          | 0.9795        | 7.5005(0.8149-69.0376) |
| HYPERLIPIDEMIA, FAMILIAL                                    | 0                                       | 0          | 19                                         | 4.5993        | 0(0-Inf)               |
| HYPERLIPIDEMIA, HEREDITARY                                  | 0                                       | 0          | 1                                          | 0.2354        | 0(0-Inf)               |

| Description                                    | No. of Positive Cases with Disease Code | Case Rate* | No. of Positive Controls with Disease Code | Control Rate* | Relative Risk (95%CI)  |
|------------------------------------------------|-----------------------------------------|------------|--------------------------------------------|---------------|------------------------|
| HYPERLIPIDEMIA, NOS--HLPD                      | 247                                     | 2205.124   | 8653                                       | 3321.7459     | 0.6638(0.5848-0.7536)  |
| HYPERLIPIDEMIA, TYPE 2                         | 2                                       | 18.7316    | 102                                        | 26.1615       | 0.716(0.1763-2.9083)   |
| HYPERLIPIDEMIA, TYPE 3                         | 0                                       | 0          | 4                                          | 0.9237        | 0(0-Inf)               |
| HYPERLIPIDEMIA, TYPE 4                         | 4                                       | 31.6258    | 112                                        | 28.043        | 1.1278(0.4149-3.0656)  |
| HYPERLIPIDEMIA, TYPE 5                         | 0                                       | 0          | 1                                          | 0.4751        | 0(0-Inf)               |
| HYPERLIPOPROTEINEMIA, NOS                      | 2                                       | 14.0502    | 71                                         | 17.643        | 0.7964(0.1948-3.2563)  |
| HYPERLIPOPROTEINEMIA, TYPE 1                   | 0                                       | 0          | 1                                          | 0.234         | 0(0-Inf)               |
| HYPERLIPOPROTEINEMIA, TYPE 2                   | 1                                       | 8.9034     | 21                                         | 5.2824        | 1.6855(0.225-12.6272)  |
| HYPERLIPOPROTEINEMIA, TYPE 3                   | 0                                       | 0          | 1                                          | 0.3526        | 0(0-Inf)               |
| HYPERLIPOPROTEINEMIA, TYPE 4                   | 0                                       | 0          | 24                                         | 7.8579        | 0(0-Inf)               |
| HYPERLIPOPROTEINEMIA, TYPE 5                   | 0                                       | 0          | 2                                          | 0.6774        | 0(0-Inf)               |
| HYPERMAGNESEMIA                                | 1                                       | 22.0824    | 5                                          | 7.4497        | 2.9642(0.3437-25.5631) |
| HYPERMENORRHEA                                 | 1                                       | 43.3524    | 12                                         | 9.2221        | 4.7009(0.6076-36.3681) |
| HYPERMETABOLISM                                | 0                                       | 0          | 2                                          | 1.1971        | 0(0-Inf)               |
| HYPERMETROPIA                                  | 0                                       | 0          | 2                                          | 0.432         | 0(0-Inf)               |
| HYPERMOBILITY, GASTROINTESTINAL                | 0                                       | 0          | 1                                          | 0.2354        | 0(0-Inf)               |
| HYPERMOBILITY, INTESTINE                       | 0                                       | 0          | 2                                          | 0.432         | 0(0-Inf)               |
| HYPERMOBILITY, JOINT                           | 0                                       | 0          | 14                                         | 3.6845        | 0(0-Inf)               |
| HYPERNASALITY                                  | 0                                       | 0          | 1                                          | 0.8528        | 0(0-Inf)               |
| HYPERNATREMIA                                  | 5                                       | 96.5809    | 94                                         | 118.9222      | 0.8121(0.3299-1.999)   |
| HYPERNEPHROMA                                  | 2                                       | 14.3563    | 27                                         | 7.9899        | 1.7968(0.4247-7.6026)  |
| HYPEROPIA, COMPOUND                            | 1                                       | 7.5444     | 3                                          | 0.9366        | 8.0548(0.8077-80.3263) |
| HYPEROPIA, HIGH                                | 0                                       | 0          | 1                                          | 0.8531        | 0(0-Inf)               |
| HYPEROPIA, NOS                                 | 56                                      | 407.7547   | 2066                                       | 574.1866      | 0.7101(0.5442-0.9266)  |
| HYPEROPIA, SIMPLE                              | 0                                       | 0          | 7                                          | 3.0162        | 0(0-Inf)               |
| HYPEROSMIA                                     | 0                                       | 0          | 1                                          | 0.2729        | 0(0-Inf)               |
| HYPEROSMOLARITY                                | 2                                       | 23.7623    | 14                                         | 8.978         | 2.6467(0.5964-11.7454) |
| HYPEROSTOSIS, BONE, NOS                        | 0                                       | 0          | 9                                          | 2.3662        | 0(0-Inf)               |
| HYPEROSTOSIS, DISSEMINATED IDIOPATHIC SKELETAL | 0                                       | 0          | 9                                          | 3.6639        | 0(0-Inf)               |
| HYPEROSTOSIS, SKULL                            | 0                                       | 0          | 3                                          | 0.8118        | 0(0-Inf)               |
| HYPEROXALURIA                                  | 0                                       | 0          | 6                                          | 1.4441        | 0(0-Inf)               |
| HYPERPARATHYROIDISM, NOS                       | 9                                       | 72.3428    | 184                                        | 65.1374       | 1.1106(0.5675-2.1737)  |
| HYPERPARATHYROIDISM, PERSISTENT                | 1                                       | 6.8894     | 4                                          | 0.9676        | 7.1197(0.7675-66.0473) |
| HYPERPARATHYROIDISM, PRIMARY                   | 17                                      | 123.2591   | 246                                        | 68.0288       | 1.8119(1.1053-2.9701)  |
| HYPERPARATHYROIDISM, RECURRENT                 | 1                                       | 8.9162     | 9                                          | 3.7862        | 2.3549(0.2944-18.8378) |
| HYPERPARATHYROIDISM, SECONDARY                 | 5                                       | 48.395     | 98                                         | 46.6005       | 1.0385(0.4217-2.5574)  |
| HYPERPARATHYROIDISM, SUSPECT                   | 2                                       | 15.0808    | 26                                         | 8.1329        | 1.8543(0.4365-7.8781)  |
| HYPERPARATHYROIDISM, TERTIARY                  | 0                                       | 0          | 3                                          | 0.741         | 0(0-Inf)               |
| HYPERPATHIA                                    | 0                                       | 0          | 2                                          | 0.4709        | 0(0-Inf)               |
| HYPERPHAGIA                                    | 0                                       | 0          | 4                                          | 1.1816        | 0(0-Inf)               |

| Description                                 | No. of Positive Cases with Disease Code | Case Rate* | No. of Positive Controls with Disease Code | Control Rate* | Relative Risk (95%CI)  |
|---------------------------------------------|-----------------------------------------|------------|--------------------------------------------|---------------|------------------------|
| HYPERPHORIA, NOS                            | 4                                       | 29.8308    | 77                                         | 23.4094       | 1.2743(0.4646-3.4953)  |
| HYPERPHOSPHATEMIA                           | 2                                       | 18.6324    | 58                                         | 25.978        | 0.7172(0.1747-2.9445)  |
| HYPERPIGMENTATION, EYELID                   | 0                                       | 0          | 3                                          | 0.9608        | 0(0-Inf)               |
| HYPERPIGMENTATION, SEE ALSO PIGMENTATION    | 4                                       | 27.8761    | 134                                        | 34.3799       | 0.8108(0.2992-2.1973)  |
| HYPERPLASIA, ADRENAL, CONGENITAL            | 0                                       | 0          | 1                                          | 0.234         | 0(0-Inf)               |
| HYPERPLASIA, ADRENAL, NODULAR               | 0                                       | 0          | 1                                          | 0.3526        | 0(0-Inf)               |
| HYPERPLASIA, ADRENAL, NOS                   | 0                                       | 0          | 12                                         | 3.5836        | 0(0-Inf)               |
| HYPERPLASIA, APPENDIX                       | 0                                       | 0          | 3                                          | 0.7063        | 0(0-Inf)               |
| HYPERPLASIA, BENIGN LYMPHOID SKIN           | 0                                       | 0          | 1                                          | 0.4048        | 0(0-Inf)               |
| HYPERPLASIA, BLADDER (PAPILLARY)            | 0                                       | 0          | 12                                         | 4.8112        | 0(0-Inf)               |
| HYPERPLASIA, BONE MARROW                    | 3                                       | 27.5181    | 9                                          | 3.9908        | 6.8954(1.8423-25.808)  |
| HYPERPLASIA, BREAST (EXCESS SIZE)           | 0                                       | 0          | 17                                         | 7.4637        | 0(0-Inf)               |
| HYPERPLASIA, BREAST (FIBROCYSTIC DISEASE)   | 3                                       | 23.0242    | 79                                         | 17.1905       | 1.3394(0.421-4.261)    |
| HYPERPLASIA, CAROTID ARTERY                 | 0                                       | 0          | 5                                          | 1.1527        | 0(0-Inf)               |
| HYPERPLASIA, CERVIX, BASAL CELL             | 0                                       | 0          | 1                                          | 0.2355        | 0(0-Inf)               |
| HYPERPLASIA, CERVIX, NOS                    | 1                                       | 22.7055    | 24                                         | 12.2196       | 1.8581(0.2498-13.8225) |
| HYPERPLASIA, CERVIX, POLYPOID               | 0                                       | 0          | 1                                          | 0.398         | 0(0-Inf)               |
| HYPERPLASIA, ENDOCERVICAL GLAND             | 1                                       | 8.4001     | 9                                          | 1.9862        | 4.2292(0.5259-34.0078) |
| HYPERPLASIA, ENDOMETRIAL                    | 7                                       | 125.4474   | 283                                        | 129.3074      | 0.9701(0.4575-2.0571)  |
| HYPERPLASIA, EPITHELIAL, BREAST             | 1                                       | 17.2967    | 33                                         | 14.7254       | 1.1746(0.1598-8.6333)  |
| HYPERPLASIA, EPITHELIAL, PHARYNX            | 0                                       | 0          | 1                                          | 0.2729        | 0(0-Inf)               |
| HYPERPLASIA, EPITHELIAL, SKIN               | 1                                       | 6.9358     | 45                                         | 11.6458       | 0.5956(0.0818-4.3352)  |
| HYPERPLASIA, EPITHELIAL, TONGUE             | 0                                       | 0          | 8                                          | 2.881         | 0(0-Inf)               |
| HYPERPLASIA, EPITHELIAL, VAGINA             | 0                                       | 0          | 1                                          | 0.2354        | 0(0-Inf)               |
| HYPERPLASIA, EPITHELIAL, VOCAL CORD         | 0                                       | 0          | 6                                          | 1.785         | 0(0-Inf)               |
| HYPERPLASIA, EPITHELIAL, VULVA              | 0                                       | 0          | 4                                          | 0.8815        | 0(0-Inf)               |
| HYPERPLASIA, ERYTHROID                      | 2                                       | 16.8495    | 9                                          | 3.4839        | 4.8364(1.0295-22.7199) |
| HYPERPLASIA, FIBROMUSCULAR, ARTERY, CAROTID | 0                                       | 0          | 7                                          | 1.6486        | 0(0-Inf)               |
| HYPERPLASIA, FIBROMUSCULAR, ARTERY, RENAL   | 0                                       | 0          | 1                                          | 0.4751        | 0(0-Inf)               |
| HYPERPLASIA, FORDYCE SEBACEOUS              | 0                                       | 0          | 1                                          | 0.8881        | 0(0-Inf)               |
| HYPERPLASIA, GENITAL, FEMALE                | 0                                       | 0          | 12                                         | 5.3047        | 0(0-Inf)               |
| HYPERPLASIA, GENITAL, MALE                  | 0                                       | 0          | 4                                          | 1.4111        | 0(0-Inf)               |
| HYPERPLASIA, GINGIVA                        | 4                                       | 29.0781    | 117                                        | 27.6964       | 1.0499(0.3864-2.8525)  |
| HYPERPLASIA, GUM                            | 0                                       | 0          | 20                                         | 5.1816        | 0(0-Inf)               |
| HYPERPLASIA, INTRADUCTAL, BREAST            | 2                                       | 28.9763    | 194                                        | 85.2197       | 0.34(0.0843-1.3713)    |
| HYPERPLASIA, INTRAVASCULAR ENDOTHELIAL      | 0                                       | 0          | 5                                          | 1.1414        | 0(0-Inf)               |
| HYPERPLASIA, JAW                            | 0                                       | 0          | 1                                          | 0.2354        | 0(0-Inf)               |
| HYPERPLASIA, LIVER                          | 0                                       | 0          | 1                                          | 0.2354        | 0(0-Inf)               |
| HYPERPLASIA, LIVER, FOCAL NODULAR           | 0                                       | 0          | 1                                          | 0.4048        | 0(0-Inf)               |
| HYPERPLASIA, LYMPHOID, INTESTINE            | 1                                       | 7.3935     | 18                                         | 5.6337        | 1.3124(0.174-9.8987)   |

| Description                                                      | No. of Positive Cases with Disease Code | Case Rate* | No. of Positive Controls with Disease Code | Control Rate* | Relative Risk (95%CI)  |
|------------------------------------------------------------------|-----------------------------------------|------------|--------------------------------------------|---------------|------------------------|
| HYPERPLASIA, LYMPHOID/LYMPH NODE                                 | 2                                       | 15.9081    | 60                                         | 14.0674       | 1.1308(0.2753-4.6456)  |
| HYPERPLASIA, MANDIBULAR                                          | 0                                       | 0          | 11                                         | 2.6815        | 0(0-Inf)               |
| HYPERPLASIA, MAXILLARY                                           | 3                                       | 23.1348    | 42                                         | 9.767         | 2.3687(0.7292-7.6939)  |
| HYPERPLASIA, MEGAKARYOCYTIC                                      | 0                                       | 0          | 3                                          | 2.0479        | 0(0-Inf)               |
| HYPERPLASIA, MELANOCYTIC                                         | 0                                       | 0          | 23                                         | 6.992         | 0(0-Inf)               |
| HYPERPLASIA, MYOMETRIUM                                          | 0                                       | 0          | 4                                          | 0.8641        | 0(0-Inf)               |
| HYPERPLASIA, NOSE                                                | 0                                       | 0          | 9                                          | 2.2041        | 0(0-Inf)               |
| HYPERPLASIA, ORAL MUCOSA                                         | 1                                       | 6.9813     | 38                                         | 9.975         | 0.6999(0.0957-5.1195)  |
| HYPERPLASIA, OVARY                                               | 1                                       | 6.9174     | 4                                          | 0.9678        | 7.1478(0.7706-66.2997) |
| HYPERPLASIA, PARATHYROID GLAND                                   | 0                                       | 0          | 12                                         | 3.1068        | 0(0-Inf)               |
| HYPERPLASIA, PHARYNX                                             | 0                                       | 0          | 5                                          | 1.2868        | 0(0-Inf)               |
| HYPERPLASIA, POLYPOID, CODE ALSO HYPERPLASIA/HYPERTROPHY BY SITE | 0                                       | 0          | 6                                          | 1.8165        | 0(0-Inf)               |
| HYPERPLASIA, PROSTATIC                                           | 40                                      | 828.5785   | 734                                        | 762.0628      | 1.0873(0.7903-1.4958)  |
| HYPERPLASIA, PROSTATIC, RECURRENT                                | 1                                       | 11.5054    | 8                                          | 4.8928        | 2.3515(0.2916-18.9628) |
| HYPERPLASIA, PSEUDOEPITHELIOMATOUS OROPHARYNX NEC                | 0                                       | 0          | 2                                          | 0.5069        | 0(0-Inf)               |
| HYPERPLASIA, PSEUDOEPITHELIOMATOUS, NEC/NOS                      | 3                                       | 21.7299    | 22                                         | 6.4233        | 3.383(1.0024-11.4174)  |
| HYPERPLASIA, RENAL ARTERY                                        | 0                                       | 0          | 1                                          | 0.2729        | 0(0-Inf)               |
| HYPERPLASIA, SALIVARY GLAND                                      | 0                                       | 0          | 4                                          | 1.0275        | 0(0-Inf)               |
| HYPERPLASIA, SEBACEOUS                                           | 26                                      | 192.7033   | 580                                        | 173.6504      | 1.1097(0.7483-1.6458)  |
| HYPERPLASIA, SQUAMOUS, VOCAL CORD                                | 1                                       | 10.3538    | 3                                          | 1.5746        | 6.5754(0.6687-64.6531) |
| HYPERPLASIA, THYROID, NOS                                        | 0                                       | 0          | 6                                          | 1.6037        | 0(0-Inf)               |
| HYPERPLASIA, TONSIL                                              | 0                                       | 0          | 2                                          | 0.6774        | 0(0-Inf)               |
| HYPERPLASIA, TOOTH                                               | 0                                       | 0          | 2                                          | 0.5837        | 0(0-Inf)               |
| HYPERPLASIA, URETHRA (PAPILLARY)                                 | 0                                       | 0          | 2                                          | 1.8987        | 0(0-Inf)               |
| HYPERPLASIA, VAGINA                                              | 0                                       | 0          | 4                                          | 0.9363        | 0(0-Inf)               |
| HYPERPLASIA, VULVA                                               | 0                                       | 0          | 12                                         | 6.244         | 0(0-Inf)               |
| HYPERPNEA, NOS                                                   | 0                                       | 0          | 1                                          | 0.8537        | 0(0-Inf)               |
| HYPERPOTASSEMIA                                                  | 0                                       | 0          | 2                                          | 0.6309        | 0(0-Inf)               |
| HYPERPROLACTINEMIA                                               | 0                                       | 0          | 6                                          | 1.5147        | 0(0-Inf)               |
| HYPERPROSTATE                                                    | 1                                       | 6.8978     | 7                                          | 1.9622        | 3.5154(0.4271-28.9333) |
| HYPERPROSTATISM                                                  | 0                                       | 0          | 1                                          | 0.3527        | 0(0-Inf)               |
| HYPERPROTEINEMIA                                                 | 1                                       | 7.4823     | 4                                          | 1.2607        | 5.9351(0.6466-54.4779) |
| HYPERREACTOR                                                     | 1                                       | 10.161     | 81                                         | 22.4024       | 0.4536(0.063-3.2647)   |
| HYPERREFLEXIA, BLADDER                                           | 3                                       | 28.0853    | 45                                         | 20.3308       | 1.3814(0.4275-4.4637)  |
| HYPERREFLEXIA, NOS                                               | 1                                       | 7.4569     | 30                                         | 9.3592        | 0.7967(0.1081-5.87)    |
| HYPERSECRETION, LACRIMAL GLANDS                                  | 0                                       | 0          | 2                                          | 1.1972        | 0(0-Inf)               |
| HYPERSECRETION, MEIBOMIAN GLAND                                  | 0                                       | 0          | 2                                          | 0.8724        | 0(0-Inf)               |
| HYPERSECRETION, SALIVA                                           | 0                                       | 0          | 7                                          | 3.5101        | 0(0-Inf)               |
| HYPERSECRETION, UPPER RESPIRATORY                                | 0                                       | 0          | 23                                         | 16.4278       | 0(0-Inf)               |

| Description                                                  | No. of Positive Cases with Disease Code | Case Rate* | No. of Positive Controls with Disease Code | Control Rate* | Relative Risk (95%CI)   |
|--------------------------------------------------------------|-----------------------------------------|------------|--------------------------------------------|---------------|-------------------------|
| HYPERSENSITIVITY, CAROTID SINUS                              | 1                                       | 11.1529    | 70                                         | 41.123        | 0.2712(0.0376-1.9553)   |
| HYPERSENSITIVITY, GINGIVAL                                   | 0                                       | 0          | 1                                          | 0.234         | 0(0-Inf)                |
| HYPERSENSITIVITY, NOS, SEE ALSO ALLERGY                      | 1                                       | 7.0753     | 24                                         | 5.6334        | 1.256(0.1687-9.3509)    |
| HYPERSENSITIVITY, PART OF BODY SPECIFIED (SKIN SENSATION #)  | 0                                       | 0          | 6                                          | 1.5041        | 0(0-Inf)                |
| HYPERSENSITIVITY, SKIN                                       | 0                                       | 0          | 14                                         | 4.7899        | 0(0-Inf)                |
| HYPERSENSITIVITY, TEETH                                      | 2                                       | 16.1841    | 83                                         | 19.627        | 0.8246(0.2022-3.3621)   |
| HYPERMOMNIA, NOS                                             | 1                                       | 7.2342     | 47                                         | 13.7118       | 0.5276(0.0726-3.8363)   |
| HYPERMOMNIA, PSYCHOPHYSIOLOGICAL                             | 0                                       | 0          | 41                                         | 10.9471       | 0(0-Inf)                |
| HYPERMOMNOLENCE, NOS                                         | 5                                       | 48.0648    | 122                                        | 57.6195       | 0.8342(0.3404-2.044)    |
| HYPERMOMNISM                                                 | 1                                       | 8.5144     | 17                                         | 6.6336        | 1.2835(0.1695-9.7168)   |
| HYPERTENSION, ACCELERATED                                    | 0                                       | 0          | 12                                         | 4.7995        | 0(0-Inf)                |
| HYPERTENSION, ARTERIAL                                       | 8                                       | 66.3776    | 177                                        | 65.8712       | 1.0077(0.4952-2.0506)   |
| HYPERTENSION, BENIGN                                         | 3                                       | 22.5798    | 25                                         | 5.9772        | 3.7777(1.1293-12.6365)  |
| HYPERTENSION, BORDERLINE                                     | 41                                      | 299.6966   | 897                                        | 225.5457      | 1.3288(0.9705-1.8192)   |
| HYPERTENSION, CRISIS                                         | 0                                       | 0          | 8                                          | 2.5174        | 0(0-Inf)                |
| HYPERTENSION, DIASTOLIC                                      | 2                                       | 13.8704    | 61                                         | 15.8619       | 0.8744(0.2131-3.5883)   |
| HYPERTENSION, DUE TO ALDOSTERONISM                           | 0                                       | 0          | 12                                         | 4.3178        | 0(0-Inf)                |
| HYPERTENSION, DUE TO ESTROGENS (PREMARIN)                    | 0                                       | 0          | 2                                          | 0.7963        | 0(0-Inf)                |
| HYPERTENSION, DUE TO FIBROMUSCULAR HYPERPLASIA, RENAL ARTERY | 0                                       | 0          | 2                                          | 0.432         | 0(0-Inf)                |
| HYPERTENSION, DUE TO ORAL CONTRACEPTIVES                     | 0                                       | 0          | 1                                          | 0.398         | 0(0-Inf)                |
| HYPERTENSION, DUE TO RENAL ARTERY ATHEROSCLEROSIS            | 0                                       | 0          | 2                                          | 1.1623        | 0(0-Inf)                |
| HYPERTENSION, DUE TO RENAL ARTERY STENOSIS                   | 2                                       | 17.9537    | 13                                         | 5.4954        | 3.267(0.7287-14.6479)   |
| HYPERTENSION, ESOPHAGOGASTRIC SPHINCTER                      | 0                                       | 0          | 1                                          | 0.2354        | 0(0-Inf)                |
| HYPERTENSION, ESSENTIAL, NOS,--HPT                           | 36                                      | 261.4128   | 1070                                       | 273.8763      | 0.9545(0.6841-1.3317)   |
| HYPERTENSION, GROUP 1                                        | 16                                      | 119.4024   | 188                                        | 44.5073       | 2.6828(1.605-4.4842)    |
| HYPERTENSION, GROUP 2                                        | 4                                       | 28.449     | 25                                         | 6.8031        | 4.1818(1.4396-12.1477)  |
| HYPERTENSION, GROUP 3                                        | 0                                       | 0          | 2                                          | 1.1974        | 0(0-Inf)                |
| HYPERTENSION, INTRACRANIAL                                   | 0                                       | 0          | 2                                          | 2.9781        | 0(0-Inf)                |
| HYPERTENSION, LABILE                                         | 36                                      | 266.9274   | 876                                        | 251.3777      | 1.0619(0.7601-1.4834)   |
| HYPERTENSION, LOW RENIN                                      | 0                                       | 0          | 2                                          | 0.5475        | 0(0-Inf)                |
| HYPERTENSION, MALIGNANT                                      | 1                                       | 9.167      | 3                                          | 1.316         | 6.9657(0.7043-68.8903)  |
| HYPERTENSION, MILD--HPTM                                     | 51                                      | 377.1696   | 1110                                       | 286.1303      | 1.3182(0.9945-1.7471)   |
| HYPERTENSION, NOS--HPT                                       | 394                                     | 5215.119   | 10057                                      | 5538.5671     | 0.9416(0.8512-1.0417)   |
| HYPERTENSION, OCULAR                                         | 15                                      | 109.4936   | 428                                        | 124.9715      | 0.8761(0.5228-1.4682)   |
| HYPERTENSION, OFFICE                                         | 2                                       | 14.8516    | 62                                         | 18.8479       | 0.788(0.1921-3.2326)    |
| HYPERTENSION, PORTAL                                         | 6                                       | 47.011     | 60                                         | 20.4148       | 2.3028(0.99-5.3565)     |
| HYPERTENSION, PREGNANCY, NOS                                 | 1                                       | 10.0353    | 1                                          | 0.2717        | 36.9298(2.185-624.1699) |
| HYPERTENSION, PULMONARY, NOS                                 | 18                                      | 198.6882   | 355                                        | 206.139       | 0.9639(0.5995-1.5496)   |



| Description                                    | No. of Positive Cases with Disease Code | Case Rate* | No. of Positive Controls with Disease Code | Control Rate* | Relative Risk (95%CI)  |
|------------------------------------------------|-----------------------------------------|------------|--------------------------------------------|---------------|------------------------|
| HYPERTENSION, PULMONARY, PRIMARY               | 0                                       | 0          | 2                                          | 0.4853        | 0(0-Inf)               |
| HYPERTENSION, PULMONARY, SECONDARY             | 1                                       | 11.0633    | 22                                         | 12.8306       | 0.8623(0.1157-6.4272)  |
| HYPERTENSION, PULMONARY, VENOUS                | 0                                       | 0          | 6                                          | 3.1491        | 0(0-Inf)               |
| HYPERTENSION, RENAL--HPTR                      | 8                                       | 67.4656    | 78                                         | 29.8352       | 2.2613(1.0879-4.7002)  |
| HYPERTENSION, RENOVASCULAR                     | 3                                       | 25.781     | 108                                        | 42.7292       | 0.6034(0.1912-1.9044)  |
| HYPERTENSION, SECONDARY, NOS                   | 7                                       | 54.8518    | 77                                         | 26.1017       | 2.1015(0.9651-4.5759)  |
| HYPERTENSION, SYSTEMIC                         | 9                                       | 84.8734    | 201                                        | 92.1143       | 0.9214(0.4717-1.7999)  |
| HYPERTENSION, SYSTOLIC                         | 36                                      | 366.1635   | 860                                        | 422.7577      | 0.8661(0.62-1.21)      |
| HYPERTENSION, WHITE COAT                       | 2                                       | 15.7002    | 74                                         | 25.005        | 0.6279(0.1537-2.5651)  |
| HYPERTENSIVE ESOPHAGOGASTRIC SPHINCTER         | 0                                       | 0          | 3                                          | 2.0939        | 0(0-Inf)               |
| HYPERTHECOSIS OVARY                            | 0                                       | 0          | 1                                          | 0.234         | 0(0-Inf)               |
| HYPERTHERMIA, MALIGNANT                        | 0                                       | 0          | 1                                          | 0.2354        | 0(0-Inf)               |
| HYPERTHERMIA, NOS                              | 0                                       | 0          | 2                                          | 1.1973        | 0(0-Inf)               |
| HYPERTHYROIDISM, EXOGENOUS                     | 3                                       | 20.8028    | 65                                         | 16.0708       | 1.2944(0.4049-4.1388)  |
| HYPERTHYROIDISM, IATROGENIC                    | 3                                       | 20.8091    | 93                                         | 22.5853       | 0.9214(0.2908-2.9191)  |
| HYPERTHYROIDISM, MEDICAMENTOSA (DRUG/CHEMICAL) | 0                                       | 0          | 33                                         | 9.59          | 0(0-Inf)               |
| HYPERTHYROIDISM, NOS--HYPT                     | 5                                       | 39.8951    | 378                                        | 132.2229      | 0.3017(0.1247-0.7298)  |
| HYPERTHYROXINEMIA, FAMILIAL (DYSALBUNINEMIC)   | 0                                       | 0          | 10                                         | 2.1611        | 0(0-Inf)               |
| HYPERTHYROXINEMIA, NOS                         | 0                                       | 0          | 12                                         | 2.7709        | 0(0-Inf)               |
| HYPERTONICITY, BLADDER                         | 0                                       | 0          | 4                                          | 1.6245        | 0(0-Inf)               |
| HYPERTONICITY, MUSCLE                          | 1                                       | 8.4756     | 7                                          | 2.7137        | 3.1233(0.3776-25.8364) |
| HYPERTRICHOISIS, NOS                           | 1                                       | 6.8995     | 19                                         | 4.5924        | 1.5024(0.1992-11.3303) |
| HYPERTRIGLYCERIDEMIA, FAMILIAL                 | 0                                       | 0          | 2                                          | 0.6309        | 0(0-Inf)               |
| HYPERTRIGLYCERIDEMIA, NOS--HTGD                | 47                                      | 347.6842   | 1547                                       | 392.8502      | 0.885(0.6616-1.1839)   |
| HYPERTROPHY, ADENOIDS                          | 0                                       | 0          | 5                                          | 1.2368        | 0(0-Inf)               |
| HYPERTROPHY, ADRENAL                           | 0                                       | 0          | 10                                         | 3.4176        | 0(0-Inf)               |
| HYPERTROPHY, ALVEOLAR PROCESS                  | 1                                       | 7.5872     | 17                                         | 5.524         | 1.3735(0.1814-10.398)  |
| HYPERTROPHY, ANAL PAPILLAE                     | 0                                       | 0          | 29                                         | 9.6594        | 0(0-Inf)               |
| HYPERTROPHY, APOCRINE GLAND                    | 0                                       | 0          | 2                                          | 0.432         | 0(0-Inf)               |
| HYPERTROPHY, ARTERY, NEC                       | 1                                       | 8.0884     | 12                                         | 4.3269        | 1.8693(0.2406-14.5237) |
| HYPERTROPHY, ARYTENOID                         | 0                                       | 0          | 1                                          | 0.4048        | 0(0-Inf)               |
| HYPERTROPHY, ASYMMETRIC, SEPTAL                | 1                                       | 7.0051     | 3                                          | 0.8044        | 8.7088(0.8747-86.7072) |
| HYPERTROPHY, BARTHOLIN GLAND                   | 0                                       | 0          | 1                                          | 0.8536        | 0(0-Inf)               |
| HYPERTROPHY, BILE DUCT                         | 0                                       | 0          | 3                                          | 0.9609        | 0(0-Inf)               |
| HYPERTROPHY, BLADDER                           | 3                                       | 32.0738    | 19                                         | 10.4839       | 3.0593(0.8994-10.4067) |
| HYPERTROPHY, BONE                              | 0                                       | 0          | 17                                         | 4.5649        | 0(0-Inf)               |
| HYPERTROPHY, BRAIN                             | 0                                       | 0          | 2                                          | 0.7896        | 0(0-Inf)               |
| HYPERTROPHY, BREAST                            | 2                                       | 16.0184    | 71                                         | 15.5591       | 1.0295(0.2515-4.2135)  |
| HYPERTROPHY, BRUNNER'S GLAND                   | 1                                       | 9.2125     | 11                                         | 4.8547        | 1.8976(0.2424-14.8535) |
| HYPERTROPHY, CARDIAC                           | 1                                       | 6.9805     | 11                                         | 2.8717        | 2.4308(0.3096-19.0825) |

| Description                                         | No. of Positive Cases with Disease Code | Case Rate* | No. of Positive Controls with Disease Code | Control Rate* | Relative Risk (95%CI)   |
|-----------------------------------------------------|-----------------------------------------|------------|--------------------------------------------|---------------|-------------------------|
| HYPERTROPHY, CARTILAGE                              | 0                                       | 0          | 1                                          | 0.234         | 0(0-Inf)                |
| HYPERTROPHY, CERVIX, NOS                            | 0                                       | 0          | 2                                          | 1.6548        | 0(0-Inf)                |
| HYPERTROPHY, CLITORIS                               | 0                                       | 0          | 1                                          | 0.2354        | 0(0-Inf)                |
| HYPERTROPHY, COLON, NOS                             | 2                                       | 16.5605    | 7                                          | 2.5995        | 6.3705(1.296-31.3144)   |
| HYPERTROPHY, CORNEA                                 | 0                                       | 0          | 2                                          | 0.5908        | 0(0-Inf)                |
| HYPERTROPHY, CRICOPHARYNGEAL                        | 0                                       | 0          | 10                                         | 5.5361        | 0(0-Inf)                |
| HYPERTROPHY, DISC SPACE                             | 1                                       | 9.9411     | 1                                          | 0.4944        | 20.1085(1.2023-336.327) |
| HYPERTROPHY, DUODENUM                               | 0                                       | 0          | 24                                         | 7.0471        | 0(0-Inf)                |
| HYPERTROPHY, ENDOMETRIUM, NOS                       | 0                                       | 0          | 29                                         | 15.5317       | 0(0-Inf)                |
| HYPERTROPHY, EPIDIDYMIS                             | 0                                       | 0          | 8                                          | 2.2839        | 0(0-Inf)                |
| HYPERTROPHY, EYELID                                 | 0                                       | 0          | 3                                          | 0.9608        | 0(0-Inf)                |
| HYPERTROPHY, FAT PAD, NOS                           | 0                                       | 0          | 2                                          | 0.4709        | 0(0-Inf)                |
| HYPERTROPHY, FAT PAD, SUPRACLAVICULAR               | 0                                       | 0          | 2                                          | 1.0784        | 0(0-Inf)                |
| HYPERTROPHY, FOOT                                   | 0                                       | 0          | 4                                          | 1.1418        | 0(0-Inf)                |
| HYPERTROPHY, FORAMEN (INTERVERTEBRAL DISC DISORDER) | 0                                       | 0          | 1                                          | 0.3526        | 0(0-Inf)                |
| HYPERTROPHY, FRENUM                                 | 0                                       | 0          | 7                                          | 2.43          | 0(0-Inf)                |
| HYPERTROPHY, FRENUM, LIP                            | 0                                       | 0          | 2                                          | 0.5838        | 0(0-Inf)                |
| HYPERTROPHY, GALLBLADDER                            | 0                                       | 0          | 5                                          | 2.3433        | 0(0-Inf)                |
| HYPERTROPHY, GASTRIC FOLDS                          | 7                                       | 54.2177    | 59                                         | 19.4819       | 2.783(1.2641-6.1268)    |
| HYPERTROPHY, GENITAL ORGAN, MALE, NEC               | 0                                       | 0          | 1                                          | 0.888         | 0(0-Inf)                |
| HYPERTROPHY, GINGIVA                                | 0                                       | 0          | 11                                         | 2.7177        | 0(0-Inf)                |
| HYPERTROPHY, GLAND, NEC                             | 0                                       | 0          | 1                                          | 0.234         | 0(0-Inf)                |
| HYPERTROPHY, GUM                                    | 0                                       | 0          | 3                                          | 0.6536        | 0(0-Inf)                |
| HYPERTROPHY, ILEUM                                  | 1                                       | 11.6828    | 0                                          | 0             | 8834671418.3964(0-Inf)  |
| HYPERTROPHY, INTESTINAL FOLDS                       | 2                                       | 17.9697    | 63                                         | 26.9212       | 0.6675(0.1629-2.7349)   |
| HYPERTROPHY, INTESTINE, NEC                         | 0                                       | 0          | 14                                         | 4.0844        | 0(0-Inf)                |
| HYPERTROPHY, KIDNEY, NOS                            | 0                                       | 0          | 1                                          | 1.9062        | 0(0-Inf)                |
| HYPERTROPHY, LABIA                                  | 1                                       | 9.3181     | 7                                          | 1.6112        | 5.7834(0.6967-48.0088)  |
| HYPERTROPHY, LIGAMENT, NOS                          | 0                                       | 0          | 1                                          | 0.8877        | 0(0-Inf)                |
| HYPERTROPHY, LIGAMENTUM FLAVUM                      | 0                                       | 0          | 2                                          | 1.7768        | 0(0-Inf)                |
| HYPERTROPHY, LIP, NOS                               | 1                                       | 6.9814     | 9                                          | 2.3947        | 2.9154(0.3638-23.3659)  |
| HYPERTROPHY, LIVER                                  | 0                                       | 0          | 7                                          | 3.1622        | 0(0-Inf)                |
| HYPERTROPHY, LIVER, ALCOHOLIC                       | 0                                       | 0          | 1                                          | 0.3526        | 0(0-Inf)                |
| HYPERTROPHY, LYMPH GLAND                            | 1                                       | 8.6541     | 6                                          | 1.4398        | 6.0108(0.7066-51.132)   |
| HYPERTROPHY, MAXILLARY TUBEROSITY                   | 0                                       | 0          | 3                                          | 0.6548        | 0(0-Inf)                |
| HYPERTROPHY, MEDIASTINUM                            | 0                                       | 0          | 1                                          | 1.0359        | 0(0-Inf)                |
| HYPERTROPHY, MOUTH                                  | 0                                       | 0          | 2                                          | 0.4681        | 0(0-Inf)                |
| HYPERTROPHY, MUCOUS MEMBRANE, NOSE                  | 0                                       | 0          | 2                                          | 0.4854        | 0(0-Inf)                |
| HYPERTROPHY, MUSCLE                                 | 2                                       | 14.3213    | 14                                         | 3.294         | 4.3477(0.9735-19.4162)  |
| HYPERTROPHY, MYOMETRIUM                             | 0                                       | 0          | 75                                         | 52.5839       | 0(0-Inf)                |

| Description                                        | No. of Positive<br>Cases with<br>Disease Code | Case<br>Rate* | No. of Positive<br>Controls with<br>Disease Code | Control<br>Rate* | Relative Risk (95%CI)  |
|----------------------------------------------------|-----------------------------------------------|---------------|--------------------------------------------------|------------------|------------------------|
| HYPERTROPHY, NAIL, NOS                             | 100                                           | 1330.065      | 1918                                             | 1341.7933        | 0.9913(0.8104-1.2125)  |
| HYPERTROPHY, NASAL, CARTILAGE                      | 0                                             | 0             | 2                                                | 0.4853           | 0(0-Inf)               |
| HYPERTROPHY, NASAL, NOS                            | 0                                             | 0             | 1                                                | 0.2355           | 0(0-Inf)               |
| HYPERTROPHY, NASAL, TURBINATE                      | 0                                             | 0             | 9                                                | 2.1898           | 0(0-Inf)               |
| HYPERTROPHY, NASOPHARYNX                           | 0                                             | 0             | 1                                                | 0.4751           | 0(0-Inf)               |
| HYPERTROPHY, OPTIC DISC                            | 0                                             | 0             | 1                                                | 0.4048           | 0(0-Inf)               |
| HYPERTROPHY, OVARY                                 | 0                                             | 0             | 2                                                | 0.4709           | 0(0-Inf)               |
| HYPERTROPHY, PALATE, HARD                          | 0                                             | 0             | 9                                                | 2.1132           | 0(0-Inf)               |
| HYPERTROPHY, PALATE, SOFT                          | 0                                             | 0             | 9                                                | 2.7016           | 0(0-Inf)               |
| HYPERTROPHY, PAPILLAE, ANAL                        | 2                                             | 14.0418       | 129                                              | 35.0143          | 0.401(0.0991-1.6235)   |
| HYPERTROPHY, PAPILLAE, TONGUE                      | 0                                             | 0             | 9                                                | 2.1463           | 0(0-Inf)               |
| HYPERTROPHY, PARATHYROID                           | 0                                             | 0             | 1                                                | 0.234            | 0(0-Inf)               |
| HYPERTROPHY, PAROTID GLAND                         | 2                                             | 13.8729       | 29                                               | 7.6123           | 1.8224(0.4321-7.6869)  |
| HYPERTROPHY, PHARYNX                               | 0                                             | 0             | 1                                                | 1.0361           | 0(0-Inf)               |
| HYPERTROPHY, PIGMENT EPITHELIUM, EYE               | 0                                             | 0             | 2                                                | 1.0786           | 0(0-Inf)               |
| HYPERTROPHY, PITUITARY                             | 0                                             | 0             | 2                                                | 3.0817           | 0(0-Inf)               |
| HYPERTROPHY, PREPUCE, MALE                         | 0                                             | 0             | 1                                                | 0.2729           | 0(0-Inf)               |
| HYPERTROPHY, PROSTATIC, BENIGN, RECURRENT          | 2                                             | 60.0502       | 9                                                | 15.177           | 3.9567(0.8492-18.4344) |
| HYPERTROPHY, PROSTATIC, BENIGN--BPH                | 164                                           | 2965.403      | 3247                                             | 2412.0657        | 1.2294(1.0508-1.4384)  |
| HYPERTROPHY, PROSTATIC, NOS                        | 25                                            | 586.3378      | 622                                              | 773.3834         | 0.7581(0.508-1.1315)   |
| HYPERTROPHY, PYLORUS                               | 0                                             | 0             | 2                                                | 0.4709           | 0(0-Inf)               |
| HYPERTROPHY, RECTUM                                | 0                                             | 0             | 6                                                | 1.5037           | 0(0-Inf)               |
| HYPERTROPHY, RETINAL PIGMENTARY (RPE), CONGENITAL# | 0                                             | 0             | 22                                               | 6.2521           | 0(0-Inf)               |
| HYPERTROPHY, SALIVARY DUCT OR GLAND, NOS           | 0                                             | 0             | 8                                                | 2.3149           | 0(0-Inf)               |
| HYPERTROPHY, SCAPHOID                              | 0                                             | 0             | 1                                                | 0.2354           | 0(0-Inf)               |
| HYPERTROPHY, SCAR, SEE ALSO KELOID                 | 1                                             | 7.3488        | 10                                               | 3.012            | 2.4398(0.3081-19.3191) |
| HYPERTROPHY, SCROTUM                               | 0                                             | 0             | 4                                                | 2.1566           | 0(0-Inf)               |
| HYPERTROPHY, SELLA TURCICA                         | 0                                             | 0             | 1                                                | 0.3526           | 0(0-Inf)               |
| HYPERTROPHY, SEPTAL (ASYMMETRIC), CARDIAC          | 1                                             | 12.4014       | 9                                                | 6.2562           | 1.9822(0.2487-15.7978) |
| HYPERTROPHY, SIGMOID                               | 0                                             | 0             | 5                                                | 1.3718           | 0(0-Inf)               |
| HYPERTROPHY, SKIN, NEC                             | 1                                             | 7.1473        | 17                                               | 4.8107           | 1.4857(0.196-11.2615)  |
| HYPERTROPHY, SPINAL LIGAMENT                       | 0                                             | 0             | 2                                                | 0.4709           | 0(0-Inf)               |
| HYPERTROPHY, STOMACH                               | 0                                             | 0             | 12                                               | 3.3379           | 0(0-Inf)               |
| HYPERTROPHY, SUBMANDIBULAR GLAND                   | 0                                             | 0             | 21                                               | 6.4648           | 0(0-Inf)               |
| HYPERTROPHY, SUBMAXILLARY GLAND                    | 0                                             | 0             | 3                                                | 0.8456           | 0(0-Inf)               |
| HYPERTROPHY, SYNOVIUM                              | 0                                             | 0             | 16                                               | 3.8559           | 0(0-Inf)               |
| HYPERTROPHY, TENDON                                | 0                                             | 0             | 4                                                | 0.942            | 0(0-Inf)               |
| HYPERTROPHY, TESTIS, NOS                           | 0                                             | 0             | 14                                               | 16.2014          | 0(0-Inf)               |
| HYPERTROPHY, THYROID, SEE ALSO GOITER              | 2                                             | 14.0143       | 13                                               | 3.3779           | 4.1489(0.9213-18.6831) |
| HYPERTROPHY, TOE, ACQUIRED                         | 0                                             | 0             | 10                                               | 4.0067           | 0(0-Inf)               |

| Description                                               | No. of Positive Cases with Disease Code |            | No. of Positive Controls with Disease Code |               | Relative Risk (95%CI)    |
|-----------------------------------------------------------|-----------------------------------------|------------|--------------------------------------------|---------------|--------------------------|
|                                                           |                                         | Case Rate* |                                            | Control Rate* |                          |
| HYPERTROPHY, TONGUE, NOS                                  | 0                                       | 0          | 10                                         | 2.4742        | 0(0-Inf)                 |
| HYPERTROPHY, TONSIL                                       | 0                                       | 0          | 36                                         | 9.0347        | 0(0-Inf)                 |
| HYPERTROPHY, TURBINATE                                    | 0                                       | 0          | 21                                         | 5.4764        | 0(0-Inf)                 |
| HYPERTROPHY, URETER                                       | 0                                       | 0          | 2                                          | 1.1971        | 0(0-Inf)                 |
| HYPERTROPHY, URETHRA                                      | 0                                       | 0          | 2                                          | 0.5069        | 0(0-Inf)                 |
| HYPERTROPHY, UTERINE                                      | 0                                       | 0          | 30                                         | 20.9832       | 0(0-Inf)                 |
| HYPERTROPHY, UVULA                                        | 0                                       | 0          | 11                                         | 2.8742        | 0(0-Inf)                 |
| HYPERTROPHY, VENTRICLE, LEFT DUE TO HYPERTENSION          | 9                                       | 69.8174    | 54                                         | 17.7268       | 3.9385(1.9321-8.0283)    |
| HYPERTROPHY, VENTRICLE, NOS (HEART#)                      | 9                                       | 75.7682    | 164                                        | 62.4167       | 1.2139(0.6191-2.3803)    |
| HYPERTROPHY, VESICAL NECK                                 | 0                                       | 0          | 3                                          | 0.871         | 0(0-Inf)                 |
| HYPERTROPHY, VOCAL CORD                                   | 0                                       | 0          | 4                                          | 0.9671        | 0(0-Inf)                 |
| HYPERTROPHY, VULVA                                        | 0                                       | 0          | 6                                          | 1.624         | 0(0-Inf)                 |
| HYPERTROPHY, WALDEYER'S RING                              | 0                                       | 0          | 1                                          | 0.398         | 0(0-Inf)                 |
| HYPERTROPIA, ALTERNATING                                  | 0                                       | 0          | 1                                          | 0.4048        | 0(0-Inf)                 |
| HYPERTROPIA, INTERMITTENT                                 | 1                                       | 11.2279    | 0                                          | 0             | 7465906570.5058(0-Inf)   |
| HYPERTROPIA, NOS                                          | 3                                       | 25.2508    | 122                                        | 46.5697       | 0.5422(0.1721-1.7079)    |
| HYPERURICEMIA                                             | 15                                      | 108.3114   | 323                                        | 91.515        | 1.1835(0.7041-1.9894)    |
| HYPERURICOSURIA                                           | 0                                       | 0          | 10                                         | 2.677         | 0(0-Inf)                 |
| HYPERVAGOTONIA, NOS (AS NERVE DIAGNOSIS)                  | 0                                       | 0          | 2                                          | 0.4681        | 0(0-Inf)                 |
| HYPERVAGOTONIA, WITH HEART DISEASE                        | 0                                       | 0          | 1                                          | 0.2729        | 0(0-Inf)                 |
| HYPERVAGOTONIA, WITH SYNCOPE                              | 0                                       | 0          | 1                                          | 0.2354        | 0(0-Inf)                 |
| HYPERVASCULARITY SEE ALSO DILATATION, FOR SPECIFIC ARTERY | 1                                       | 14.1308    | 8                                          | 6.4119        | 2.2038(0.2734-17.7678)   |
| HYPERVENTILATION, CAUSE SPECIFIED                         | 1                                       | 6.9987     | 10                                         | 2.3549        | 2.972(0.3744-23.5948)    |
| HYPERVENTILATION, NOS                                     | 10                                      | 84.0641    | 204                                        | 49.2798       | 1.7059(0.9018-3.2266)    |
| HYPERVENTILATION, PSYCHOGENIC                             | 1                                       | 7.1194     | 1                                          | 0.219         | 32.5119(1.8946-557.9066) |
| HYPERVISCOSITY                                            | 1                                       | 6.8776     | 0                                          | 0             | 12222243750.1752(0-Inf)  |
| HYPERVITAMINOSIS, A                                       | 0                                       | 0          | 3                                          | 0.9609        | 0(0-Inf)                 |
| HYPERVITAMINOSIS, D                                       | 0                                       | 0          | 3                                          | 0.7063        | 0(0-Inf)                 |
| HYPERVITAMINOSIS, NOS                                     | 0                                       | 0          | 2                                          | 1.1614        | 0(0-Inf)                 |
| HYPERVOLEMIA                                              | 2                                       | 17.1916    | 4                                          | 1.5871        | 10.832(1.9316-60.7435)   |
| HYPESTHESIA                                               | 1                                       | 6.936      | 20                                         | 4.9343        | 1.4057(0.1871-10.5596)   |
| HYPHEMA, IRIS                                             | 0                                       | 0          | 2                                          | 0.5069        | 0(0-Inf)                 |
| HYPHEMA, NOS                                              | 0                                       | 0          | 14                                         | 5.9877        | 0(0-Inf)                 |
| HYPHEMA, PARTIAL                                          | 1                                       | 7.7986     | 9                                          | 2.2379        | 3.4847(0.4349-27.9195)   |
| HYPHEMA, TOTAL                                            | 0                                       | 0          | 1                                          | 0.2728        | 0(0-Inf)                 |
| HYPHEMA, TRAUMATIC                                        | 0                                       | 0          | 12                                         | 3.1448        | 0(0-Inf)                 |
| HYPOACTIVE, LABYRINTH                                     | 1                                       | 7.3825     | 12                                         | 3.6162        | 2.0415(0.2623-15.888)    |
| HYPOACTIVE, VOCAL CORD                                    | 0                                       | 0          | 2                                          | 0.7053        | 0(0-Inf)                 |
| HYPOACUSIS                                                | 0                                       | 0          | 1                                          | 0.8878        | 0(0-Inf)                 |

| Description                                                                     | No. of Positive Cases with Disease Code | Case Rate* | No. of Positive Controls with Disease Code | Control Rate* | Relative Risk (95%CI)    |
|---------------------------------------------------------------------------------|-----------------------------------------|------------|--------------------------------------------|---------------|--------------------------|
| HYPOADRENALISM                                                                  | 0                                       | 0          | 1                                          | 0.4048        | 0(0-Inf)                 |
| HYPOALBUMINEMIA                                                                 | 4                                       | 49.6382    | 39                                         | 26.4137       | 1.8793(0.6687-5.281)     |
| HYPOALDOSTERONISM                                                               | 1                                       | 9.7063     | 9                                          | 4.297         | 2.2588(0.283-18.0271)    |
| HYPOALPHALIPOPROTEINEMIA                                                        | 0                                       | 0          | 5                                          | 1.2831        | 0(0-Inf)                 |
| HYPOCALCEMIA                                                                    | 5                                       | 40.9202    | 112                                        | 40.8828       | 1.0009(0.4075-2.4587)    |
| HYPOCERULOPLASMINEMIA                                                           | 0                                       | 0          | 1                                          | 0.2729        | 0(0-Inf)                 |
| HYPOCHLOREMIA                                                                   | 0                                       | 0          | 7                                          | 3.543         | 0(0-Inf)                 |
| HYPOCHONDRIA                                                                    | 1                                       | 6.9999     | 15                                         | 3.9985        | 1.7506(0.2289-13.3864)   |
| HYPOCHROMASIA BLOOD CELLS                                                       | 1                                       | 10.1077    | 0                                          | 0             | 14218066464.244(0-Inf)   |
| HYPOCOMPLEMENTEMIA                                                              | 0                                       | 0          | 1                                          | 0.2354        | 0(0-Inf)                 |
| HYPOESTHESIA                                                                    | 0                                       | 0          | 5                                          | 1.2481        | 0(0-Inf)                 |
| HYPOESTROGENISM                                                                 | 0                                       | 0          | 50                                         | 21.655        | 0(0-Inf)                 |
| HYPOGAMMAGLOBULINEMIA                                                           | 3                                       | 23.8003    | 21                                         | 7.3564        | 3.2353(0.9561-10.9476)   |
| HYPOGLYCEMIA, FUNCTIONAL                                                        | 0                                       | 0          | 1                                          | 0.398         | 0(0-Inf)                 |
| HYPOGLYCEMIA, NOS                                                               | 11                                      | 105.0548   | 204                                        | 94.904        | 1.107(0.6023-2.0343)     |
| HYPOGLYCEMIA, POST-GASTRECTOMY                                                  | 0                                       | 0          | 1                                          | 0.8886        | 0(0-Inf)                 |
| HYPOGLYCEMIA, WITH DIABETES, CODE ALSO EFFECT ADVERSE ANTIDIABETIC AGENT STATED | 1                                       | 9.951      | 37                                         | 18.3513       | 0.5423(0.0742-3.9644)    |
| HYPOGONADISM, HYPOGONADOTROPHIC                                                 | 0                                       | 0          | 25                                         | 9.1863        | 0(0-Inf)                 |
| HYPOGONADISM, NOS, MALE                                                         | 5                                       | 99.6178    | 107                                        | 108.0986      | 0.9215(0.3752-2.2632)    |
| HYPOGONADISM, OVARIAN (PRIMARY) FEMALE                                          | 0                                       | 0          | 3                                          | 0.9641        | 0(0-Inf)                 |
| HYPOGONADISM, PRIMARY, MALE                                                     | 0                                       | 0          | 22                                         | 37.4108       | 0(0-Inf)                 |
| HYPOGONADISM, SECONDARY, MALE                                                   | 1                                       | 9.2921     | 7                                          | 3.2204        | 2.8854(0.3512-23.7069)   |
| HYPOHIDROSIS                                                                    | 0                                       | 0          | 2                                          | 0.6309        | 0(0-Inf)                 |
| HYPOKALEMIA                                                                     | 42                                      | 397.5517   | 1109                                       | 501.2438      | 0.7931(0.5824-1.0801)    |
| HYPOKINETIC HEART                                                               | 0                                       | 0          | 18                                         | 9.5299        | 0(0-Inf)                 |
| HYPOLIPOPROTEINEMIA                                                             | 0                                       | 0          | 5                                          | 1.2296        | 0(0-Inf)                 |
| HYPOMAGNESEMIA                                                                  | 5                                       | 52.942     | 78                                         | 43.6108       | 1.214(0.49-3.0077)       |
| HYPOMANIA                                                                       | 2                                       | 15.0971    | 26                                         | 8.2508        | 1.8298(0.4311-7.7661)    |
| HYPOMELANOSIS (SKIN)                                                            | 2                                       | 13.876     | 10                                         | 2.4238        | 5.7249(1.2296-26.6543)   |
| HYPOMETABOLISM                                                                  | 0                                       | 0          | 2                                          | 0.8723        | 0(0-Inf)                 |
| HYPONATREMIA                                                                    | 44                                      | 591.1692   | 846                                        | 639.9747      | 0.9237(0.6818-1.2515)    |
| HYPO-OSMOLALITY                                                                 | 0                                       | 0          | 4                                          | 1.5793        | 0(0-Inf)                 |
| HYPOPARATHYROIDISM, FAMILIAL                                                    | 0                                       | 0          | 1                                          | 0.234         | 0(0-Inf)                 |
| HYPOPARATHYROIDISM, IDIOPATHIC                                                  | 0                                       | 0          | 1                                          | 0.234         | 0(0-Inf)                 |
| HYPOPARATHYROIDISM, NOS                                                         | 1                                       | 6.9518     | 15                                         | 3.5259        | 1.9716(0.2574-15.1011)   |
| HYPOPARATHYROIDISM, POSTSURGICAL                                                | 0                                       | 0          | 5                                          | 1.2713        | 0(0-Inf)                 |
| HYPOPARATHYROIDISM, SECONDARY                                                   | 1                                       | 7.6965     | 1                                          | 0.3293        | 23.3698(1.3842-394.5547) |
| HYPOPERFUSION, CARDIAC                                                          | 0                                       | 0          | 3                                          | 1.5756        | 0(0-Inf)                 |

| Description                                          | No. of Positive Cases with Disease Code | Case Rate* | No. of Positive Controls with Disease Code | Control Rate* | Relative Risk (95%CI)  |
|------------------------------------------------------|-----------------------------------------|------------|--------------------------------------------|---------------|------------------------|
| HYPOPERFUSION, CEREBRAL                              | 1                                       | 11.8013    | 7                                          | 4.4241        | 2.6675(0.3244-21.9342) |
| HYPOPERFUSION, RENAL                                 | 0                                       | 0          | 2                                          | 3.0809        | 0(0-Inf)               |
| HYPOPERISTALSIS ESOPHAGUS SEE ALSO MOTILITY DISORDER | 0                                       | 0          | 1                                          | 0.8528        | 0(0-Inf)               |
| HYPOPHARYNGITIS                                      | 0                                       | 0          | 2                                          | 0.4709        | 0(0-Inf)               |
| HYPOPHOSPHATASIA                                     | 0                                       | 0          | 1                                          | 0.398         | 0(0-Inf)               |
| HYPOPHOSPHATEMIA, NOS                                | 0                                       | 0          | 28                                         | 21.054        | 0(0-Inf)               |
| HYPOPIGMENTATION, SKIN, NOS                          | 1                                       | 6.9871     | 16                                         | 4.1524        | 1.6827(0.221-12.8146)  |
| HYPOPITUITARISM, NOS                                 | 1                                       | 7.1106     | 10                                         | 2.9091        | 2.4442(0.3093-19.3185) |
| HYPOPLASIA, BONE MARROW, NOS                         | 1                                       | 7.97       | 8                                          | 2.8783        | 2.769(0.342-22.4207)   |
| HYPOPLASIA, BONE, NEC                                | 0                                       | 0          | 1                                          | 0.2729        | 0(0-Inf)               |
| HYPOPLASIA, BREASTS                                  | 0                                       | 0          | 23                                         | 15.072        | 0(0-Inf)               |
| HYPOPLASIA, ENDOMETRIUM                              | 0                                       | 0          | 2                                          | 0.5908        | 0(0-Inf)               |
| HYPOPLASIA, EYE                                      | 0                                       | 0          | 1                                          | 0.2354        | 0(0-Inf)               |
| HYPOPLASIA, FALLOPIAN TUBE                           | 0                                       | 0          | 1                                          | 0.8529        | 0(0-Inf)               |
| HYPOPLASIA, HAND                                     | 0                                       | 0          | 1                                          | 0.398         | 0(0-Inf)               |
| HYPOPLASIA, KIDNEY                                   | 0                                       | 0          | 2                                          | 0.5069        | 0(0-Inf)               |
| HYPOPLASIA, LUNG                                     | 0                                       | 0          | 1                                          | 0.2729        | 0(0-Inf)               |
| HYPOPLASIA, MANDIBLE                                 | 0                                       | 0          | 2                                          | 0.5838        | 0(0-Inf)               |
| HYPOPLASIA, MAXILLARY                                | 0                                       | 0          | 1                                          | 0.4751        | 0(0-Inf)               |
| HYPOPLASIA, OPTIC NERVE                              | 0                                       | 0          | 1                                          | 0.2354        | 0(0-Inf)               |
| HYPOPLASIA, PAROTID GLAND                            | 0                                       | 0          | 1                                          | 0.234         | 0(0-Inf)               |
| HYPOPLASIA, PULMONARY ARTERY                         | 0                                       | 0          | 1                                          | 0.2729        | 0(0-Inf)               |
| HYPOPLASIA, RIB                                      | 0                                       | 0          | 1                                          | 0.3526        | 0(0-Inf)               |
| HYPOPLASIA, SKIN                                     | 0                                       | 0          | 4                                          | 2.3012        | 0(0-Inf)               |
| HYPOPLASIA, TRICUSPID VALVE                          | 0                                       | 0          | 1                                          | 0.4048        | 0(0-Inf)               |
| HYPOPLASIA, UPPER EXTREMITY, CONGENITAL              | 0                                       | 0          | 1                                          | 0.2729        | 0(0-Inf)               |
| HYPOPNEA                                             | 7                                       | 51.5554    | 290                                        | 89.8101       | 0.574(0.2709-1.2164)   |
| HYPOPOTASSEMIA                                       | 0                                       | 0          | 2                                          | 3.0841        | 0(0-Inf)               |
| HYPOPROTEINEMIA                                      | 1                                       | 7.3161     | 8                                          | 2.3483        | 3.1155(0.3824-25.3844) |
| HYPOPROTHROMBINEMIA, NOS                             | 0                                       | 0          | 1                                          | 0.8537        | 0(0-Inf)               |
| HYPOPYON, EYE                                        | 0                                       | 0          | 1                                          | 0.2729        | 0(0-Inf)               |
| HYPOREFLEXIA                                         | 1                                       | 8.2555     | 5                                          | 1.8576        | 4.4442(0.5083-38.858)  |
| HYPORENINISM                                         | 0                                       | 0          | 5                                          | 1.9394        | 0(0-Inf)               |
| HYPOSMIA                                             | 1                                       | 7.073      | 12                                         | 3.3065        | 2.1391(0.2749-16.6471) |
| HYPOSPADIAS, NOS                                     | 1                                       | 19.7632    | 10                                         | 10.0288       | 1.9706(0.2503-15.5144) |
| HYOSPERMA                                            | 0                                       | 0          | 1                                          | 2.486         | 0(0-Inf)               |
| HYOSPLENISM                                          | 0                                       | 0          | 3                                          | 0.7884        | 0(0-Inf)               |
| HYPOTENSION, DRUG-INDUCED                            | 0                                       | 0          | 40                                         | 25.1089       | 0(0-Inf)               |
| HYPOTENSION, ESOPHAGOGASTRIC SPHINCTER               | 0                                       | 0          | 4                                          | 1.0306        | 0(0-Inf)               |
| HYPOTENSION, NOS                                     | 36                                      | 498.7272   | 688                                        | 544.3617      | 0.9162(0.6548-1.2818)  |

| Description                                   | No. of Positive Cases with Disease Code | Case Rate* | No. of Positive Controls with Disease Code | Control Rate* | Relative Risk (95%CI)  |
|-----------------------------------------------|-----------------------------------------|------------|--------------------------------------------|---------------|------------------------|
| HYPOTENSION, ORTHOSTATIC                      | 33                                      | 404.5719   | 574                                        | 380.2557      | 1.0639(0.7484-1.5125)  |
| HYPOTENSION, ORTHOSTATIC IDIOPATHIC           | 1                                       | 11.1605    | 13                                         | 7.6376        | 1.4613(0.1897-11.254)  |
| HYPOTENSION, ORTHOSTATIC, DRUG-INDUCED        | 3                                       | 31.9315    | 30                                         | 16.5249       | 1.9323(0.5863-6.3689)  |
| HYPOTENSION, POSTURAL                         | 4                                       | 39.017     | 96                                         | 46.0375       | 0.8475(0.311-2.3096)   |
| HYPOTENSION, POSTURAL, DRUG-INDUCED           | 0                                       | 0          | 5                                          | 1.1874        | 0(0-Inf)               |
| HYPOTHERMIA                                   | 2                                       | 14.8404    | 17                                         | 5.1563        | 2.8781(0.6573-12.6024) |
| HYPOTHYROIDISM, CHEMICAL                      | 3                                       | 24.3046    | 64                                         | 22.8911       | 1.0617(0.3324-3.3919)  |
| HYPOTHYROIDISM, IODINE THERAPY INDUCED        | 0                                       | 0          | 7                                          | 1.5158        | 0(0-Inf)               |
| HYPOTHYROIDISM, NOS--HYPO                     | 85                                      | 716.4855   | 2558                                       | 902.5198      | 0.7939(0.6392-0.9859)  |
| HYPOTHYROIDISM, POST RADIOIODINE (POST I-131) | 1                                       | 7.8277     | 133                                        | 30.3595       | 0.2578(0.036-1.8466)   |
| HYPOTHYROIDISM, POSTOP/POST SURGICAL          | 3                                       | 22.5395    | 23                                         | 7.1318        | 3.1604(0.9386-10.6414) |
| HYPOTHYROIDISM, PRIMARY                       | 12                                      | 87.8602    | 362                                        | 105.6714      | 0.8314(0.4671-1.4801)  |
| HYPOTHYROIDISM, SECONDARY, NEC                | 3                                       | 21.9472    | 59                                         | 17.3968       | 1.2616(0.3937-4.0427)  |
| HYPOTHYROIDISM, SURGICAL                      | 1                                       | 7.1092     | 24                                         | 6.5023        | 1.0933(0.1468-8.1402)  |
| HYPOTONIA, BLADDER                            | 1                                       | 11.9079    | 19                                         | 12.1708       | 0.9784(0.1304-7.3404)  |
| HYPOTONIA, EYE                                | 0                                       | 0          | 5                                          | 1.3717        | 0(0-Inf)               |
| HYPOTONIA, NOS                                | 0                                       | 0          | 10                                         | 2.7831        | 0(0-Inf)               |
| HYPOTONY, DUE TO EYE DISEASE                  | 0                                       | 0          | 3                                          | 2.0479        | 0(0-Inf)               |
| HYPOTROPIA                                    | 0                                       | 0          | 13                                         | 3.9746        | 0(0-Inf)               |
| HYPOVENTILATION, CAUSE SPECIFIED              | 0                                       | 0          | 13                                         | 4.0115        | 0(0-Inf)               |
| HYPOVENTILATION, NOS                          | 3                                       | 23.3627    | 46                                         | 15.4395       | 1.5132(0.4683-4.8898)  |
| HYPOVOLEMIA                                   | 5                                       | 56.5149    | 63                                         | 38.1621       | 1.4809(0.5937-3.6941)  |
| HYPOXEMIA--HYPX                               | 14                                      | 148.7108   | 230                                        | 125.6255      | 1.1838(0.689-2.0339)   |
| HYPOXIA (SEE ALSO ANOXIA)                     | 23                                      | 329.5302   | 332                                        | 279.4188      | 1.1793(0.772-1.8016)   |
| HYSTERIA                                      | 1                                       | 20.3683    | 7                                          | 2.6863        | 7.5823(0.9214-62.3948) |
| ICHTHYOSIS, ACQUIRED                          | 0                                       | 0          | 4                                          | 1.2654        | 0(0-Inf)               |
| ICHTHYOSIS, LAMELLAR                          | 0                                       | 0          | 1                                          | 0.234         | 0(0-Inf)               |
| ICHTHYOSIS, NOS                               | 1                                       | 6.9604     | 22                                         | 5.3546        | 1.2999(0.1739-9.7159)  |
| ICHTHYOSIS, VULGARIS                          | 1                                       | 6.963      | 14                                         | 3.4454        | 2.021(0.2629-15.5351)  |
| ICTERUS, NOS, SEE ALSO JAUNDICE               | 0                                       | 0          | 2                                          | 1.1971        | 0(0-Inf)               |
| ILEITIS (REGIONAL)--SEE ALSO ENTERITIS        | 3                                       | 21.9276    | 55                                         | 16.2633       | 1.3483(0.4198-4.33)    |
| ILEUS, NOS                                    | 11                                      | 135.5332   | 97                                         | 65.6266       | 2.0652(1.1038-3.8641)  |
| ILEUS, PARALYTIC                              | 1                                       | 15.1272    | 6                                          | 5.2572        | 2.8774(0.3432-24.1267) |
| ILLNESS, FACTITIAL                            | 0                                       | 0          | 8                                          | 1.8318        | 0(0-Inf)               |
| ILLNESS, FEBRILE                              | 24                                      | 247.7791   | 460                                        | 237.7691      | 1.0421(0.6906-1.5726)  |
| ILLNESS, RESPIRATORY, ACUTE                   | 2                                       | 18.5613    | 35                                         | 8.5997        | 2.1584(0.5156-9.0345)  |
| ILLNESS, RESPIRATORY, NOS                     | 3                                       | 34.9022    | 125                                        | 79.0191       | 0.4417(0.1403-1.3901)  |
| ILLNESS, RESPIRATORY, VIRAL                   | 3                                       | 21.8749    | 48                                         | 13.9482       | 1.5683(0.4857-5.0643)  |
| ILLNESS, VIRAL, NOS                           | 9                                       | 66.3547    | 417                                        | 125.8831      | 0.5271(0.2721-1.0213)  |
| IMBALANCE, AUTONOMIC                          | 0                                       | 0          | 1                                          | 0.8877        | 0(0-Inf)               |

| Description                                    | No. of Positive Cases with Disease Code | Case Rate* | No. of Positive Controls with Disease Code | Control Rate* | Relative Risk (95%CI)  |
|------------------------------------------------|-----------------------------------------|------------|--------------------------------------------|---------------|------------------------|
| IMBALANCE, ELECTROLYTE                         | 2                                       | 21.998     | 26                                         | 15.2888       | 1.4388(0.3396-6.0959)  |
| IMBALANCE, EYE MUSCLE                          | 0                                       | 0          | 4                                          | 2.3236        | 0(0-Inf)               |
| IMBALANCE, LABYRINTHINE                        | 0                                       | 0          | 1                                          | 0.8893        | 0(0-Inf)               |
| IMBALANCE, METABOLIC                           | 0                                       | 0          | 2                                          | 1.898         | 0(0-Inf)               |
| IMBALANCE, NOS                                 | 19                                      | 223.3022   | 448                                        | 279.5121      | 0.7989(0.5043-1.2656)  |
| IMMUNIZATION UPDATE                            | 1                                       | 10.6545    | 46                                         | 25.2765       | 0.4215(0.058-3.0638)   |
| IMMUNOCOMPROMISED HOST                         | 3                                       | 25.6743    | 32                                         | 12.6448       | 2.0304(0.6179-6.6714)  |
| IMMUNOSUPPRESSED, HOST                         | 0                                       | 0          | 2                                          | 0.7052        | 0(0-Inf)               |
| IMMUNOSUPPRESSED, PATIENT                      | 6                                       | 47.2922    | 49                                         | 16.8183       | 2.812(1.1972-6.6046)   |
| IMPACTION, BARIUM                              | 1                                       | 8.5042     | 10                                         | 3.8909        | 2.1857(0.2763-17.2883) |
| IMPACTION, CERUMEN                             | 90                                      | 802.3003   | 2555                                       | 1050.4724     | 0.7638(0.6186-0.9429)  |
| IMPACTION, COLON                               | 0                                       | 0          | 6                                          | 2.4455        | 0(0-Inf)               |
| IMPACTION, FECAL, NOS                          | 7                                       | 76.0899    | 150                                        | 84.6727       | 0.8986(0.4204-1.9211)  |
| IMPACTION, FOREIGN BODY (MEAT BOLUS) ESOPHAGUS | 2                                       | 20.2527    | 93                                         | 47.3481       | 0.4277(0.1052-1.7387)  |
| IMPACTION, GALLSTONE, INTESTINE                | 1                                       | 11.7285    | 0                                          | 0             | 8840774133.7339(0-Inf) |
| IMPACTION, GALLSTONE, NEC                      | 0                                       | 0          | 8                                          | 1.9195        | 0(0-Inf)               |
| IMPACTION, NASAL SEPTUM                        | 0                                       | 0          | 17                                         | 4.211         | 0(0-Inf)               |
| IMPACTION, RECTUM                              | 0                                       | 0          | 5                                          | 1.2651        | 0(0-Inf)               |
| IMPACTION, TOOTH, NOS--IMPT                    | 14                                      | 168.2123   | 375                                        | 116.892       | 1.439(0.8429-2.4569)   |
| IMPACTION, TOOTH, WITH ABNORMAL POSITION       | 0                                       | 0          | 2                                          | 1.2662        | 0(0-Inf)               |
| IMPACTION, TURBINATE                           | 0                                       | 0          | 3                                          | 0.8458        | 0(0-Inf)               |
| IMPAIRED, CIRCULATION                          | 0                                       | 0          | 8                                          | 3.0907        | 0(0-Inf)               |
| IMPAIRED, CONCENTRATION                        | 2                                       | 15.5742    | 12                                         | 2.7744        | 5.6136(1.2347-25.5214) |
| IMPAIRED, FUNCTION, BOTH LOWER LIMBS           | 0                                       | 0          | 1                                          | 0.8528        | 0(0-Inf)               |
| IMPAIRED, FUNCTION, BOTH UPPER LIMBS           | 0                                       | 0          | 1                                          | 0.8529        | 0(0-Inf)               |
| IMPAIRED, FUNCTION, FINGER(S)                  | 0                                       | 0          | 2                                          | 1.1613        | 0(0-Inf)               |
| IMPAIRED, FUNCTION, GENERALIZED, INTELLECTUAL  | 0                                       | 0          | 3                                          | 7.6785        | 0(0-Inf)               |
| IMPAIRED, FUNCTION, LIVER                      | 0                                       | 0          | 8                                          | 2.2532        | 0(0-Inf)               |
| IMPAIRED, FUNCTION, LOWER LIMB                 | 2                                       | 14.3171    | 12                                         | 3.4186        | 4.1879(0.9237-18.9876) |
| IMPAIRED, FUNCTION, NEC                        | 2                                       | 24.3819    | 11                                         | 7.457         | 3.2697(0.7172-14.906)  |
| IMPAIRED, FUNCTION, NEUROMUSCULOSKELETAL, NEC  | 0                                       | 0          | 1                                          | 0.8529        | 0(0-Inf)               |
| IMPAIRED, FUNCTION, NOS                        | 0                                       | 0          | 7                                          | 11.1402       | 0(0-Inf)               |
| IMPAIRED, FUNCTION, RENAL                      | 5                                       | 58.0979    | 81                                         | 50.1024       | 1.1596(0.4688-2.8684)  |
| IMPAIRED, FUNCTION, THUMB(S)                   | 0                                       | 0          | 2                                          | 0.5709        | 0(0-Inf)               |
| IMPAIRED, FUNCTION, UPPER LIMB                 | 1                                       | 9.1996     | 28                                         | 12.3612       | 0.7442(0.1008-5.4945)  |
| IMPAIRED, GASTRIC EMPTYING                     | 1                                       | 9.2568     | 10                                         | 4.514         | 2.0507(0.2594-16.2138) |
| IMPAIRED, GLUCOSE TOLERANCE                    | 18                                      | 150.9252   | 463                                        | 176.0456      | 0.8573(0.5347-1.3745)  |
| IMPAIRED, HEARING (PERCEPTION)                 | 0                                       | 0          | 30                                         | 17.0726       | 0(0-Inf)               |
| IMPAIRED, HEARING, UNSPECIFIED                 | 15                                      | 166.9236   | 269                                        | 156.3566      | 1.0676(0.6338-1.7983)  |
| IMPAIRED, HYPOGLYCEMIC AWARENESS               | 1                                       | 7.4185     | 12                                         | 3.711         | 1.9991(0.2571-15.5419) |



| Description                                                             | No. of Positive Cases with Disease Code | Case Rate* | No. of Positive Controls with Disease Code | Control Rate* | Relative Risk (95%CI)  |
|-------------------------------------------------------------------------|-----------------------------------------|------------|--------------------------------------------|---------------|------------------------|
| IMPAIRED, INTELLECTUAL FUNCTION, GENERALIZED                            | 0                                       | 0          | 17                                         | 5.5745        | 0(0-Inf)               |
| IMPAIRED, MEMORY                                                        | 33                                      | 400.3624   | 678                                        | 436.6918      | 0.9168(0.6459-1.3012)  |
| IMPAIRED, RENAL RESERVE                                                 | 1                                       | 7.8022     | 5                                          | 1.746         | 4.4686(0.5128-38.9357) |
| IMPAIRMENT, MODERATE, BOTH EYES                                         | 0                                       | 0          | 1                                          | 0.234         | 0(0-Inf)               |
| IMPETIGINIZATION                                                        | 15                                      | 147.2263   | 175                                        | 83.8756       | 1.7553(1.0337-2.9806)  |
| IMPETIGO, BULLOUS                                                       | 0                                       | 0          | 5                                          | 1.5263        | 0(0-Inf)               |
| IMPETIGO, HERPETIFORMIS                                                 | 0                                       | 0          | 1                                          | 0.3527        | 0(0-Inf)               |
| IMPETIGO, NOS                                                           | 8                                       | 56.5154    | 210                                        | 50.1513       | 1.1269(0.555-2.2882)   |
| IMPINGEMENT SPINAL PROCESSUS                                            | 0                                       | 0          | 15                                         | 3.7994        | 0(0-Inf)               |
| IMPOTENCE, NEUROGENIC                                                   | 0                                       | 0          | 1                                          | 0.3526        | 0(0-Inf)               |
| IMPOTENCE, NOS                                                          | 43                                      | 347.8772   | 963                                        | 349.4013      | 0.9956(0.733-1.3524)   |
| IMPOTENCE, PSYCHOGENIC                                                  | 0                                       | 0          | 2                                          | 0.5457        | 0(0-Inf)               |
| IMPOTENCE, VASCULOGENIC                                                 | 1                                       | 14.3542    | 31                                         | 19.2742       | 0.7447(0.1013-5.4729)  |
| INACTIVITY (PHYSICAL)                                                   | 4                                       | 34.0053    | 86                                         | 33.4025       | 1.018(0.3725-2.7827)   |
| INADEQUATE, DIET                                                        | 7                                       | 87.7983    | 142                                        | 100.1876      | 0.8763(0.4096-1.8749)  |
| INADEQUATE, IMMUNIZATIONS                                               | 1                                       | 7.6253     | 48                                         | 15.4531       | 0.4934(0.0679-3.5861)  |
| INADEQUATE, VENOUS ACCESS                                               | 0                                       | 0          | 3                                          | 5.4812        | 0(0-Inf)               |
| INANITION--SEE ALSO MALNUTRITION                                        | 0                                       | 0          | 2                                          | 8.3836        | 0(0-Inf)               |
| INAPPROPRIATE SECRETION, ANTIDIURETIC HORMONE (ADH), IDIOPATHIC AND NOS | 0                                       | 0          | 50                                         | 27.9094       | 0(0-Inf)               |
| INAPPROPRIATE SECRETION, ANTIDIURETIC HORMONE (ADH), SECONDARY          | 0                                       | 0          | 7                                          | 5.6146        | 0(0-Inf)               |
| INCARCERATION, LENS                                                     | 1                                       | 11.341     | 0                                          | 0             | 7476257111.3847(0-Inf) |
| INCIDENTALOMA, ADRENAL                                                  | 0                                       | 0          | 16                                         | 5.5145        | 0(0-Inf)               |
| INCIDENTALOMA, PITUITARY                                                | 0                                       | 0          | 2                                          | 0.4681        | 0(0-Inf)               |
| INCOMPATIBILITY, RH, NOTED DURING PREGNANCY                             | 0                                       | 0          | 4                                          | 2.7429        | 0(0-Inf)               |
| INCOMPETENCE, ANAL SPHINCTER                                            | 1                                       | 7.4714     | 13                                         | 3.9983        | 1.8686(0.2418-14.442)  |
| INCOMPETENCE, AORTIC VALVE, SEE ALSO INSUFFICIENCY                      | 0                                       | 0          | 2                                          | 0.5709        | 0(0-Inf)               |
| INCOMPETENCE, BLADDER SPHINCTER                                         | 1                                       | 7.5496     | 123                                        | 38.8826       | 0.1942(0.0271-1.3914)  |
| INCOMPETENCE, CERVICAL OS                                               | 0                                       | 0          | 1                                          | 0.8276        | 0(0-Inf)               |
| INCOMPETENCE, CRICOPHARYNGEAL                                           | 0                                       | 0          | 3                                          | 2.094         | 0(0-Inf)               |
| INCOMPETENCE, ESOPHAGOGASTRIC JUNCTION                                  | 0                                       | 0          | 1                                          | 0.2354        | 0(0-Inf)               |
| INCOMPETENCE, ESOPHAGOGASTRIC SPHINCTER                                 | 2                                       | 13.879     | 35                                         | 8.6725        | 1.6004(0.3824-6.6975)  |
| INCOMPETENCE, GASTROESOPHAGEAL SPHINCTER                                | 0                                       | 0          | 4                                          | 1.5299        | 0(0-Inf)               |
| INCOMPETENCE, MITRAL, SEE ALSO INSUFFICIENCY                            | 0                                       | 0          | 6                                          | 1.9219        | 0(0-Inf)               |
| INCOMPETENCE, TRICUSPID, SEE ALSO INSUFFICIENCY, TRICUSPID              | 0                                       | 0          | 2                                          | 0.7896        | 0(0-Inf)               |
| INCOMPETENCE, VEINS                                                     | 6                                       | 42.0191    | 176                                        | 42.4455       | 0.99(0.4377-2.2388)    |
| INCOMPETENCE, VELOPHARYNGEAL                                            | 0                                       | 0          | 1                                          | 0.2354        | 0(0-Inf)               |
| INCOMPETENCE, VENTRICULAR                                               | 0                                       | 0          | 3                                          | 0.8711        | 0(0-Inf)               |

| Description                                                      | No. of Positive Cases with Disease Code | Case Rate* | No. of Positive Controls with Disease Code | Control Rate* | Relative Risk (95%CI)  |
|------------------------------------------------------------------|-----------------------------------------|------------|--------------------------------------------|---------------|------------------------|
| INCONTINENCE, ANAL                                               | 17                                      | 164.7878   | 420                                        | 198.3024      | 0.831(0.5111-1.3511)   |
| INCONTINENCE, URGENCY                                            | 38                                      | 332.5835   | 1058                                       | 424.1918      | 0.784(0.5668-1.0845)   |
| INCONTINENCE, URINARY                                            | 81                                      | 774.5802   | 2128                                       | 981.196       | 0.7894(0.632-0.9861)   |
| INCONTINENCE, URINARY, STRESS                                    | 45                                      | 334.868    | 1648                                       | 405.0234      | 0.8268(0.6144-1.1127)  |
| INCONTINENTIA PIGMENT                                            | 0                                       | 0          | 4                                          | 1.3725        | 0(0-Inf)               |
| INCOORDINATION, ESOPHAGEAL-PHARYNGEAL                            | 0                                       | 0          | 2                                          | 0.7053        | 0(0-Inf)               |
| INCOORDINATION, MOTOR ESOPHAGUS                                  | 0                                       | 0          | 13                                         | 4.076         | 0(0-Inf)               |
| INCOORDINATION, MUSCLE                                           | 1                                       | 10.0259    | 4                                          | 2.006         | 4.998(0.5472-45.6523)  |
| INCOORDINATION, NOS                                              | 2                                       | 18.8286    | 31                                         | 14.1535       | 1.3303(0.3167-5.5872)  |
| INCREASED, PULMONARY FLOW                                        | 0                                       | 0          | 2                                          | 0.591         | 0(0-Inf)               |
| INCREASED, RISK FOR DEVELOPING MALIGNANCY                        | 2                                       | 13.8644    | 44                                         | 10.7196       | 1.2934(0.3119-5.3639)  |
| INCREASED, RISK FOR STD (RISKY SEXUAL BEHAVIOR)                  | 0                                       | 0          | 3                                          | 0.7175        | 0(0-Inf)               |
| INCREASED, VENTRICLE PRESSURES (HEART), SEE ALSO                 |                                         |            |                                            |               |                        |
| DYSKINESIA                                                       | 0                                       | 0          | 8                                          | 8.5553        | 0(0-Inf)               |
| INCYCLOTORSION                                                   | 0                                       | 0          | 2                                          | 1.1972        | 0(0-Inf)               |
| INDICES ABNORMALITY--SEE ALSO MACRO-/MICRO-                      | 0                                       | 0          | 1                                          | 0.2354        | 0(0-Inf)               |
| INDIGESTION, FUNCTIONAL                                          | 0                                       | 0          | 13                                         | 3.79          | 0(0-Inf)               |
| INDIGESTION, NOS                                                 | 5                                       | 34.8869    | 78                                         | 19.0985       | 1.8267(0.7362-4.5323)  |
| INDURATION, ANAL                                                 | 0                                       | 0          | 2                                          | 0.6774        | 0(0-Inf)               |
| INDURATION, BREAST                                               | 0                                       | 0          | 4                                          | 0.9751        | 0(0-Inf)               |
| INDURATION, PROSTATE (BED)(POSITIVE FOR MALIGNANCY)              | 11                                      | 195.4044   | 175                                        | 149.1433      | 1.3102(0.7112-2.4135)  |
| INDURATION, PROSTATE (NO MALIGNANCY FOUND)--INPR                 | 24                                      | 204.7765   | 568                                        | 224.9646      | 0.9103(0.6045-1.3706)  |
| INDURATION, RECTAL                                               | 0                                       | 0          | 1                                          | 0.2729        | 0(0-Inf)               |
| INDURATION, SKIN                                                 | 1                                       | 7.1793     | 20                                         | 4.5813        | 1.5671(0.2085-11.7806) |
| INDURATION, URETHROVESICAL ANASTOMOTIC SITE (MALIGNANCY FOUND)   | 0                                       | 0          | 1                                          | 0.3526        | 0(0-Inf)               |
| INEQUALITY, LEG LENGTH, NOS                                      | 0                                       | 0          | 11                                         | 3.3198        | 0(0-Inf)               |
| INFARCTION, BOWEL, NOS                                           | 0                                       | 0          | 7                                          | 2.8519        | 0(0-Inf)               |
| INFARCTION, BRAIN STEM, NOS                                      | 4                                       | 31.678     | 39                                         | 13.5326       | 2.3409(0.8315-6.5902)  |
| INFARCTION, BRAIN, NOS                                           | 16                                      | 190.1289   | 315                                        | 201.4814      | 0.9437(0.5703-1.5614)  |
| INFARCTION, BRAIN, OLD, NOS                                      | 13                                      | 130.0645   | 318                                        | 158.9529      | 0.8183(0.4693-1.4267)  |
| INFARCTION, BRAIN, OLD, WITH RESIDUAL                            | 6                                       | 59.7987    | 115                                        | 57.1893       | 1.0456(0.4591-2.3816)  |
| INFARCTION, CAPSULAR                                             | 1                                       | 9.4989     | 13                                         | 6.0532        | 1.5692(0.2034-12.1059) |
| INFARCTION, CARDIAC, ACUTE, NOS, SEE ALSO INFARCTION, MYOCARDIAL | 0                                       | 0          | 1                                          | 0.4049        | 0(0-Inf)               |
| INFARCTION, CARDIAC, NOS, SEE ALSO INFARCTION, MYOCARDIAL        | 0                                       | 0          | 2                                          | 0.4708        | 0(0-Inf)               |
| INFARCTION, CAROTID                                              | 0                                       | 0          | 4                                          | 2.3011        | 0(0-Inf)               |
| INFARCTION, CEREBRAL, EMBOLIC, SEE ALSO EMBOLISM                 | 1                                       | 15.7093    | 23                                         | 21.3868       | 0.7345(0.0989-5.4554)  |
| INFARCTION, CEREBRAL, NOS                                        | 28                                      | 302.7434   | 556                                        | 309.382       | 0.9785(0.6687-1.4319)  |

| Description                                                           | No. of Positive Cases with Disease Code | Case Rate* | No. of Positive Controls with Disease Code | Control Rate* | Relative Risk (95%CI)  |
|-----------------------------------------------------------------------|-----------------------------------------|------------|--------------------------------------------|---------------|------------------------|
| INFARCTION, CEREBRAL, OLD                                             | 7                                       | 83.0842    | 232                                        | 148.6885      | 0.5588(0.2632-1.1865)  |
| INFARCTION, CEREBRAL, RESIDUAL                                        | 6                                       | 71.3637    | 141                                        | 90.9436       | 0.7847(0.3461-1.7793)  |
| INFARCTION, CUTANEOUS                                                 | 1                                       | 7.1967     | 11                                         | 2.6062        | 2.7613(0.3516-21.6892) |
| INFARCTION, EAR                                                       | 0                                       | 0          | 2                                          | 0.5475        | 0(0-Inf)               |
| INFARCTION, EXTREMITY                                                 | 0                                       | 0          | 7                                          | 3.3494        | 0(0-Inf)               |
| INFARCTION, FALLOPIAN TUBE                                            | 0                                       | 0          | 3                                          | 1.1947        | 0(0-Inf)               |
| INFARCTION, FRONTAL LOBE                                              | 1                                       | 11.8817    | 47                                         | 30.1753       | 0.3938(0.0542-2.8598)  |
| INFARCTION, HEART, ACUTE, NOS, SEE ALSO INFARCTION, MYOCARDIAL        | 0                                       | 0          | 2                                          | 3.0809        | 0(0-Inf)               |
| INFARCTION, HEART, NOS, SEE ALSO INFARCTION, MYOCARDIAL               | 0                                       | 0          | 3                                          | 0.961         | 0(0-Inf)               |
| INFARCTION, INTESTINE, LARGE                                          | 0                                       | 0          | 9                                          | 2.2932        | 0(0-Inf)               |
| INFARCTION, INTESTINE, NOS                                            | 0                                       | 0          | 1                                          | 1.9059        | 0(0-Inf)               |
| INFARCTION, INTESTINE, SMALL                                          | 0                                       | 0          | 13                                         | 3.5661        | 0(0-Inf)               |
| INFARCTION, INTRAOPERATIVE (CODE ALSO BY SITE)(SEE ALSO COMPLICATION) | 0                                       | 0          | 2                                          | 1.898         | 0(0-Inf)               |
| INFARCTION, KIDNEY, NOS                                               | 0                                       | 0          | 5                                          | 1.8563        | 0(0-Inf)               |
| INFARCTION, LIVER                                                     | 0                                       | 0          | 2                                          | 0.7896        | 0(0-Inf)               |
| INFARCTION, LUNG, DUE TO TORSION                                      | 0                                       | 0          | 1                                          | 0.3526        | 0(0-Inf)               |
| INFARCTION, MEDULLARY                                                 | 0                                       | 0          | 10                                         | 4.2431        | 0(0-Inf)               |
| INFARCTION, MESENTERIC ARTERY                                         | 0                                       | 0          | 1                                          | 0.8879        | 0(0-Inf)               |
| INFARCTION, MUSCLE                                                    | 0                                       | 0          | 2                                          | 1.7764        | 0(0-Inf)               |
| INFARCTION, MYOCARDIAL, ABORTED                                       | 0                                       | 0          | 2                                          | 1.1972        | 0(0-Inf)               |
| INFARCTION, MYOCARDIAL, ANTERIOR, ACUTE                               | 7                                       | 62.1221    | 214                                        | 90.0017       | 0.6902(0.3247-1.4674)  |
| INFARCTION, MYOCARDIAL, ANTERIOR, OLD                                 | 6                                       | 55.1335    | 157                                        | 69.4919       | 0.7934(0.3505-1.7959)  |
| INFARCTION, MYOCARDIAL, ANTEROLATERAL, ACUTE                          | 4                                       | 32.6756    | 37                                         | 13.6767       | 2.3891(0.8466-6.742)   |
| INFARCTION, MYOCARDIAL, ANTEROLATERAL, OLD                            | 2                                       | 19.837     | 20                                         | 9.8983        | 2.0041(0.4654-8.6294)  |
| INFARCTION, MYOCARDIAL, ANTEROSEPTAL, ACUTE                           | 2                                       | 15.177     | 57                                         | 18.671        | 0.8129(0.1979-3.3396)  |
| INFARCTION, MYOCARDIAL, ANTEROSEPTAL, OLD                             | 2                                       | 17.2784    | 58                                         | 23.5009       | 0.7352(0.1791-3.0184)  |
| INFARCTION, MYOCARDIAL, APICAL-LATERAL, ACUTE                         | 0                                       | 0          | 5                                          | 1.3368        | 0(0-Inf)               |
| INFARCTION, MYOCARDIAL, APICAL-LATERAL, OLD                           | 0                                       | 0          | 6                                          | 1.7849        | 0(0-Inf)               |
| INFARCTION, MYOCARDIAL, ATRIAL, ACUTE                                 | 0                                       | 0          | 1                                          | 0.234         | 0(0-Inf)               |
| INFARCTION, MYOCARDIAL, BASAL-LATERAL, ACUTE                          | 0                                       | 0          | 1                                          | 0.234         | 0(0-Inf)               |
| INFARCTION, MYOCARDIAL, BASAL-LATERAL, OLD                            | 0                                       | 0          | 1                                          | 0.3526        | 0(0-Inf)               |
| INFARCTION, MYOCARDIAL, COMBINED SITES, OLD                           | 0                                       | 0          | 1                                          | 0.888         | 0(0-Inf)               |
| INFARCTION, MYOCARDIAL, INFERIOR, ACUTE                               | 17                                      | 128.4681   | 424                                        | 134.2099      | 0.9572(0.5887-1.5564)  |
| INFARCTION, MYOCARDIAL, INFERIOR, OLD                                 | 15                                      | 126.2584   | 352                                        | 133.338       | 0.9469(0.5641-1.5895)  |
| INFARCTION, MYOCARDIAL, INFERO-APICAL, ACUTE                          | 0                                       | 0          | 5                                          | 1.6801        | 0(0-Inf)               |
| INFARCTION, MYOCARDIAL, INFERO-APICAL, OLD                            | 0                                       | 0          | 9                                          | 5.4281        | 0(0-Inf)               |
| INFARCTION, MYOCARDIAL, INFEROLATERAL, ACUTE                          | 1                                       | 7.6971     | 35                                         | 11.5908       | 0.6641(0.0906-4.866)   |
| INFARCTION, MYOCARDIAL, INFEROLATERAL, OLD                            | 1                                       | 12.1044    | 16                                         | 10.4499       | 1.1583(0.1528-8.7807)  |

| Description                                                           | No. of Positive Cases with Disease Code | Case Rate* | No. of Positive Controls with Disease Code | Control Rate* | Relative Risk (95%CI)  |
|-----------------------------------------------------------------------|-----------------------------------------|------------|--------------------------------------------|---------------|------------------------|
| INFARCTION, MYOCARDIAL, LATERAL, ACUTE                                | 0                                       | 0          | 43                                         | 12.3734       | 0(0-Inf)               |
| INFARCTION, MYOCARDIAL, LATERAL, OLD                                  | 0                                       | 0          | 11                                         | 5.0776        | 0(0-Inf)               |
| INFARCTION, MYOCARDIAL, NEC, ACUTE                                    | 4                                       | 37.1561    | 68                                         | 30.4789       | 1.2191(0.4433-3.3528)  |
| INFARCTION, MYOCARDIAL, NEC, OLD                                      | 1                                       | 8.5091     | 16                                         | 6.3048        | 1.3496(0.1777-10.2483) |
| INFARCTION, MYOCARDIAL, NOS                                           | 0                                       | 0          | 2                                          | 0.5069        | 0(0-Inf)               |
| INFARCTION, MYOCARDIAL, NOS, ACUTE (8 WEEKS OR LESS CODED ACUTE)      | 47                                      | 579.6906   | 1044                                       | 694.3157      | 0.8349(0.6229-1.119)   |
| INFARCTION, MYOCARDIAL, NOS, OLD--MIO                                 | 50                                      | 525.9078   | 1191                                       | 623.526       | 0.8434(0.6352-1.12)    |
| INFARCTION, MYOCARDIAL, POSTERIOR, ACUTE                              | 1                                       | 7.9642     | 24                                         | 8.525         | 0.9342(0.1258-6.9403)  |
| INFARCTION, MYOCARDIAL, POSTERIOR, OLD                                | 0                                       | 0          | 8                                          | 2.7264        | 0(0-Inf)               |
| INFARCTION, MYOCARDIAL, POSTEROBASAL, OLD                             | 0                                       | 0          | 1                                          | 0.3526        | 0(0-Inf)               |
| INFARCTION, MYOCARDIAL, POSTEROLATERAL, ACUTE                         | 0                                       | 0          | 9                                          | 2.0943        | 0(0-Inf)               |
| INFARCTION, MYOCARDIAL, POSTEROLATERAL, OLD                           | 0                                       | 0          | 4                                          | 1.0587        | 0(0-Inf)               |
| INFARCTION, MYOCARDIAL, SEPTAL, ACUTE                                 | 0                                       | 0          | 4                                          | 1.8404        | 0(0-Inf)               |
| INFARCTION, MYOCARDIAL, SEPTAL, OLD                                   | 0                                       | 0          | 2                                          | 1.8979        | 0(0-Inf)               |
| INFARCTION, MYOCARDIAL, SUBENDOCARDIAL, ACUTE                         | 6                                       | 44.3004    | 111                                        | 34.1126       | 1.2987(0.5694-2.9617)  |
| INFARCTION, MYOCARDIAL, SUBENDOCARDIAL, OLD                           | 1                                       | 7.7795     | 43                                         | 14.6803       | 0.5299(0.0728-3.859)   |
| INFARCTION, OCCIPITAL LOBE                                            | 5                                       | 56.6237    | 61                                         | 36.4845       | 1.552(0.6215-3.8756)   |
| INFARCTION, OMENTUM                                                   | 0                                       | 0          | 1                                          | 0.2729        | 0(0-Inf)               |
| INFARCTION, OVARY                                                     | 0                                       | 0          | 3                                          | 1.5113        | 0(0-Inf)               |
| INFARCTION, PARIETAL LOBE                                             | 1                                       | 12.0158    | 54                                         | 35.367        | 0.3397(0.0469-2.46)    |
| INFARCTION, PERIOPERATIVE (CODE ALSO BY SITE)(SEE ALSO COMPLICATION)  | 1                                       | 12.2521    | 20                                         | 13.735        | 0.892(0.1192-6.6778)   |
| INFARCTION, PONS                                                      | 0                                       | 0          | 3                                          | 1.2146        | 0(0-Inf)               |
| INFARCTION, PONTINE                                                   | 3                                       | 39.0017    | 49                                         | 35.4356       | 1.1006(0.342-3.5417)   |
| INFARCTION, POST-OPERATIVE (CODE ALSO BY SITE)(SEE ALSO COMPLICATION) | 1                                       | 13.6362    | 20                                         | 15.6794       | 0.8697(0.1162-6.5074)  |
| INFARCTION, PROSTATE                                                  | 0                                       | 0          | 2                                          | 0.7053        | 0(0-Inf)               |
| INFARCTION, PULMONARY                                                 | 0                                       | 0          | 14                                         | 3.6513        | 0(0-Inf)               |
| INFARCTION, PULMONARY, OLD                                            | 0                                       | 0          | 2                                          | 1.1614        | 0(0-Inf)               |
| INFARCTION, RENAL                                                     | 0                                       | 0          | 6                                          | 1.6231        | 0(0-Inf)               |
| INFARCTION, RETINAL                                                   | 0                                       | 0          | 13                                         | 3.7366        | 0(0-Inf)               |
| INFARCTION, SPINAL CORD                                               | 0                                       | 0          | 5                                          | 3.2387        | 0(0-Inf)               |
| INFARCTION, SPLEEN, NOS                                               | 0                                       | 0          | 5                                          | 2.0354        | 0(0-Inf)               |
| INFARCTION, SPLENIC ARTERY, NOS                                       | 0                                       | 0          | 2                                          | 1.1621        | 0(0-Inf)               |
| INFARCTION, SUBCUTANEOUS                                              | 0                                       | 0          | 3                                          | 1.5108        | 0(0-Inf)               |
| INFARCTION, SUBENDOCARDIAL, ACUTE                                     | 1                                       | 9.9585     | 12                                         | 5.9401        | 1.6765(0.2161-13.008)  |
| INFARCTION, SUBENDOCARDIAL, OLD                                       | 0                                       | 0          | 8                                          | 3.2177        | 0(0-Inf)               |
| INFARCTION, TEMPORAL LOBE                                             | 0                                       | 0          | 26                                         | 11.1244       | 0(0-Inf)               |
| INFARCTION, TESTES                                                    | 0                                       | 0          | 3                                          | 0.8187        | 0(0-Inf)               |

| Description                                               | No. of Positive Cases with Disease Code | Case Rate* | No. of Positive Controls with Disease Code | Control Rate* | Relative Risk (95%CI)    |
|-----------------------------------------------------------|-----------------------------------------|------------|--------------------------------------------|---------------|--------------------------|
| INFARCTION, THALAMIC                                      | 1                                       | 9.5796     | 51                                         | 23.9684       | 0.3997(0.0551-2.8989)    |
| INFARCTION, VERTEBRAL-BASILAR                             | 0                                       | 0          | 13                                         | 6.2111        | 0(0-Inf)                 |
| INFARCTION, VESTIBULAR ARTERY                             | 1                                       | 7.1984     | 0                                          | 0             | 12741155008.3097(0-Inf)  |
| INFECTION, ACROMIOCLAVICULAR                              | 0                                       | 0          | 2                                          | 0.6309        | 0(0-Inf)                 |
| INFECTION, ADENOVIRAL, NOS                                | 0                                       | 0          | 3                                          | 0.8874        | 0(0-Inf)                 |
| INFECTION, AEROGENES CAPSULATUS                           | 0                                       | 0          | 1                                          | 0.2354        | 0(0-Inf)                 |
| INFECTION, ANAEROBIC, CODE ALSO CONDITION STATED          | 0                                       | 0          | 2                                          | 1.0783        | 0(0-Inf)                 |
| INFECTION, ANKLE, JOINT                                   | 0                                       | 0          | 6                                          | 3.1061        | 0(0-Inf)                 |
| INFECTION, ANKLE, WITH ORTHOPEDIC DEVICE, NOT TOTAL JOINT | 0                                       | 0          | 2                                          | 1.1971        | 0(0-Inf)                 |
| INFECTION, ANUS                                           | 0                                       | 0          | 9                                          | 2.366         | 0(0-Inf)                 |
| INFECTION, ASPERGILLUS (FUMIGATUS)                        | 1                                       | 7.4599     | 19                                         | 5.9432        | 1.2552(0.1668-9.4429)    |
| INFECTION, AXILLARY GLAND                                 | 0                                       | 0          | 3                                          | 0.8457        | 0(0-Inf)                 |
| INFECTION, BACILLUS, COLI                                 | 0                                       | 0          | 1                                          | 1.9073        | 0(0-Inf)                 |
| INFECTION, BACILLUS, NOS                                  | 3                                       | 20.8515    | 25                                         | 6.3204        | 3.2991(0.9869-11.0287)   |
| INFECTION, BILE DUCT                                      | 0                                       | 0          | 1                                          | 0.2354        | 0(0-Inf)                 |
| INFECTION, BLADDER, SEE ALSO CYSTITIS                     | 3                                       | 28.7034    | 25                                         | 11.71         | 2.4512(0.7346-8.1794)    |
| INFECTION, BLASTOCYSTIS HOMINIS                           | 0                                       | 0          | 2                                          | 1.7764        | 0(0-Inf)                 |
| INFECTION, BORRELIA                                       | 0                                       | 0          | 1                                          | 0.3526        | 0(0-Inf)                 |
| INFECTION, BRAIN                                          | 0                                       | 0          | 1                                          | 0.2729        | 0(0-Inf)                 |
| INFECTION, BREAST, NOS                                    | 0                                       | 0          | 7                                          | 1.9652        | 0(0-Inf)                 |
| INFECTION, BRONCHOPULMONARY, SEE ALSO BRONCHOPNEUMONIA    | 0                                       | 0          | 32                                         | 9.0535        | 0(0-Inf)                 |
| INFECTION, BRONCHUS, SEE ALSO BRONCHITIS                  | 2                                       | 20.5984    | 7                                          | 3.6467        | 5.6485(1.1548-27.63)     |
| INFECTION, CAMPYLOBACTER (INTESTINE)                      | 1                                       | 7.8537     | 9                                          | 3.0468        | 2.5777(0.3217-20.6521)   |
| INFECTION, CAMPYLOBACTER (SITE OTHER THAN INTESTINE)      | 0                                       | 0          | 2                                          | 0.468         | 0(0-Inf)                 |
| INFECTION, CEREBRAL ARTERY                                | 0                                       | 0          | 1                                          | 2.4877        | 0(0-Inf)                 |
| INFECTION, CHILOMASTIX                                    | 0                                       | 0          | 1                                          | 0.234         | 0(0-Inf)                 |
| INFECTION, CHLAMYDIA***, CODE ALSO BY SITE IF STATED      | 0                                       | 0          | 6                                          | 2.3316        | 0(0-Inf)                 |
| INFECTION, CLADOSPORIUM                                   | 0                                       | 0          | 1                                          | 0.8877        | 0(0-Inf)                 |
| INFECTION, CLOSTRIDIUM (INTESTINE)                        | 3                                       | 32.5835    | 34                                         | 19.2077       | 1.6964(0.5184-5.5512)    |
| INFECTION, COCCIDIOIDES                                   | 0                                       | 0          | 1                                          | 0.3526        | 0(0-Inf)                 |
| INFECTION, COLON, SEE ALSO ENTERITIS                      | 0                                       | 0          | 1                                          | 0.8877        | 0(0-Inf)                 |
| INFECTION, COXSACKIE, NEC                                 | 0                                       | 0          | 5                                          | 1.5449        | 0(0-Inf)                 |
| INFECTION, CRYPTOCOCCUS                                   | 1                                       | 6.937      | 2                                          | 0.4959        | 13.9886(1.2073-162.0846) |
| INFECTION, CRYPTOCOCCUS NEOFORMANS                        | 0                                       | 0          | 1                                          | 0.2354        | 0(0-Inf)                 |
| INFECTION, CRYPTOSPORIDIUM                                | 0                                       | 0          | 2                                          | 0.7896        | 0(0-Inf)                 |
| INFECTION, CUTANEOUS, YEAST                               | 0                                       | 0          | 14                                         | 4.686         | 0(0-Inf)                 |
| INFECTION, CYTOMEGALOVIRUS (INCLUDES CONGENITAL)          | 1                                       | 7.3054     | 13                                         | 3.8342        | 1.9053(0.2465-14.7301)   |
| INFECTION, DENTAL                                         | 0                                       | 0          | 34                                         | 9.1816        | 0(0-Inf)                 |

| Description                                                          | No. of Positive Cases with Disease Code | Case Rate* | No. of Positive Controls with Disease Code | Control Rate* | Relative Risk (95%CI)  |
|----------------------------------------------------------------------|-----------------------------------------|------------|--------------------------------------------|---------------|------------------------|
| INFECTION, DISC                                                      | 0                                       | 0          | 15                                         | 5.4543        | 0(0-Inf)               |
| INFECTION, E. COLI                                                   | 0                                       | 0          | 41                                         | 12.1383       | 0(0-Inf)               |
| INFECTION, EAR DRUM, SEE ALSO OTITIS MEDIA                           | 0                                       | 0          | 3                                          | 0.8019        | 0(0-Inf)               |
| INFECTION, EAR LOBE                                                  | 0                                       | 0          | 15                                         | 3.723         | 0(0-Inf)               |
| INFECTION, EAR, CHRONIC/RECURRENT                                    | 0                                       | 0          | 3                                          | 0.8018        | 0(0-Inf)               |
| INFECTION, EAR, EXTERNAL                                             | 0                                       | 0          | 9                                          | 2.0506        | 0(0-Inf)               |
| INFECTION, EAR, SEE ALSO OTITIS                                      | 3                                       | 21.524     | 38                                         | 10.9409       | 1.9673(0.6035-6.4128)  |
| INFECTION, EHRlichia CANIS                                           | 0                                       | 0          | 3                                          | 1.9014        | 0(0-Inf)               |
| INFECTION, ELBOW, JOINT                                              | 3                                       | 21.8627    | 34                                         | 10.3239       | 2.1177(0.6465-6.9364)  |
| INFECTION, ELBOW, WITH TOTAL JOINT                                   | 0                                       | 0          | 2                                          | 1.0783        | 0(0-Inf)               |
| INFECTION, ENTEROBACTER CLOACAE                                      | 0                                       | 0          | 5                                          | 3.2914        | 0(0-Inf)               |
| INFECTION, ENTEROCOCCAL, SEE ALSO CONDITION STATED (STREPTOCOCCAL #) | 1                                       | 9.903      | 20                                         | 9.9561        | 0.9947(0.1327-7.4555)  |
| INFECTION, ENTEROVIRUS, NEC                                          | 0                                       | 0          | 2                                          | 0.6774        | 0(0-Inf)               |
| INFECTION, EPSTEIN-BARR                                              | 0                                       | 0          | 4                                          | 1.6244        | 0(0-Inf)               |
| INFECTION, ESCHERICHIA COLI, NOS                                     | 0                                       | 0          | 7                                          | 1.9191        | 0(0-Inf)               |
| INFECTION, EUSTACHIAN TUBE                                           | 0                                       | 0          | 3                                          | 0.8457        | 0(0-Inf)               |
| INFECTION, EYE, NOS                                                  | 0                                       | 0          | 16                                         | 6.6335        | 0(0-Inf)               |
| INFECTION, EYELID, NEC                                               | 1                                       | 7.0876     | 21                                         | 5.9021        | 1.2009(0.1604-8.9878)  |
| INFECTION, FASCIA                                                    | 0                                       | 0          | 2                                          | 0.5837        | 0(0-Inf)               |
| INFECTION, FINGER, JOINT                                             | 1                                       | 6.9501     | 19                                         | 4.8495        | 1.4331(0.1902-10.7972) |
| INFECTION, FINGER, NOS                                               | 2                                       | 16.0716    | 69                                         | 24.4533       | 0.6572(0.1607-2.6886)  |
| INFECTION, FINGER, WITH ORTHOPEDIC DEVICE, NOT TOTAL JOINT           | 0                                       | 0          | 2                                          | 0.6309        | 0(0-Inf)               |
| INFECTION, FINGER, WITH TOTAL JOINT                                  | 0                                       | 0          | 1                                          | 0.2354        | 0(0-Inf)               |
| INFECTION, FUNGUS, FOOT                                              | 1                                       | 6.9477     | 34                                         | 8.5268        | 0.8148(0.111-5.9789)   |
| INFECTION, FUNGUS, HAND                                              | 0                                       | 0          | 6                                          | 1.8812        | 0(0-Inf)               |
| INFECTION, FUNGUS, NAIL, SEE ALSO TINEA                              | 4                                       | 31.2948    | 39                                         | 13.2299       | 2.3655(0.8399-6.6617)  |
| INFECTION, FUNGUS, NOS                                               | 8                                       | 57.4695    | 156                                        | 45.0024       | 1.277(0.626-2.6053)    |
| INFECTION, GASTRIC, SEE ALSO GASTRITIS                               | 0                                       | 0          | 3                                          | 0.8018        | 0(0-Inf)               |
| INFECTION, GENERALIZED, PSEUDOMONAS AERUGINOSA                       | 0                                       | 0          | 2                                          | 0.5709        | 0(0-Inf)               |
| INFECTION, GENITAL ORGAN OR TRACT, FEMALE, NOS                       | 0                                       | 0          | 4                                          | 0.9364        | 0(0-Inf)               |
| INFECTION, GENITAL, NEC, MALE                                        | 0                                       | 0          | 1                                          | 0.3526        | 0(0-Inf)               |
| INFECTION, GENITOURINARY, SEE ALSO INFECTION, URINARY                | 0                                       | 0          | 8                                          | 2.6919        | 0(0-Inf)               |
| INFECTION, GINGIVA, NOS                                              | 0                                       | 0          | 4                                          | 1.04          | 0(0-Inf)               |
| INFECTION, GRAM-NEGATIVE BACILLI, NEC                                | 3                                       | 25.3085    | 43                                         | 16.6169       | 1.5231(0.4699-4.9367)  |
| INFECTION, GRAM-POSITIVE, NEC                                        | 1                                       | 8.723      | 19                                         | 7.7132        | 1.1309(0.1504-8.5037)  |
| INFECTION, HAEMOPHILUS INFLUENZAE (H. INFLUENZA)                     | 1                                       | 7.6765     | 18                                         | 6.0219        | 1.2748(0.1691-9.6102)  |
| INFECTION, HELICOBACTER PYLORI (CODE ALSO BY SITE IF STATED)         | 0                                       | 0          | 55                                         | 25.6513       | 0(0-Inf)               |

| Description                                              | No. of Positive Cases with Disease Code | Case Rate* | No. of Positive Controls with Disease Code | Control Rate* | Relative Risk (95%CI)    |
|----------------------------------------------------------|-----------------------------------------|------------|--------------------------------------------|---------------|--------------------------|
| INFECTION, HIP, JOINT                                    | 0                                       | 0          | 12                                         | 6.6773        | 0(0-Inf)                 |
| INFECTION, HIP, WITH ORTHOPEDIC DEVICE, NOT TOTAL JOINT  | 0                                       | 0          | 3                                          | 1.5758        | 0(0-Inf)                 |
| INFECTION, HIP, WITH TOTAL JOINT PROSTHESIS              | 1                                       | 11.5929    | 24                                         | 15.0772       | 0.7689(0.1036-5.7075)    |
| INFECTION, HOSPITAL-CONTRACTED, NOT SURGICAL             | 0                                       | 0          | 1                                          | 1.9084        | 0(0-Inf)                 |
| INFECTION, INTERNAL PROSTHETIC DEVICE (NON ORTHOPEDIC)   | 0                                       | 0          | 2                                          | 0.4854        | 0(0-Inf)                 |
| INFECTION, INTESTINAL, SEE ALSO ENTERITIS                | 0                                       | 0          | 1                                          | 0.234         | 0(0-Inf)                 |
| INFECTION, JAW                                           | 0                                       | 0          | 6                                          | 1.444         | 0(0-Inf)                 |
| INFECTION, JOINT, LOWER EXTREMITY, NEC                   | 0                                       | 0          | 6                                          | 1.5883        | 0(0-Inf)                 |
| INFECTION, JOINT, NEC                                    | 0                                       | 0          | 5                                          | 1.5261        | 0(0-Inf)                 |
| INFECTION, JOINT, NEC, WITH TOTAL JOINT                  | 0                                       | 0          | 1                                          | 0.8878        | 0(0-Inf)                 |
| INFECTION, JOINT, UPPER EXTREMITY, NEC                   | 0                                       | 0          | 5                                          | 1.2666        | 0(0-Inf)                 |
| INFECTION, KIDNEY                                        | 1                                       | 8.465      | 9                                          | 3.4743        | 2.4365(0.3045-19.4921)   |
| INFECTION, KLEBSIELLA PNEUMONIAE (NOT PNEUMONIA)         | 1                                       | 11.4016    | 4                                          | 2.4088        | 4.7333(0.5192-43.1477)   |
| INFECTION, KNEE, JOINT                                   | 3                                       | 23.3042    | 34                                         | 11.4419       | 2.0367(0.6218-6.6719)    |
| INFECTION, KNEE, WITH ORTHOPEDIC DEVICE, NOT TOTAL JOINT | 0                                       | 0          | 1                                          | 0.4049        | 0(0-Inf)                 |
| INFECTION, KNEE, WITH TOTAL JOINT PROSTHESIS             | 1                                       | 9.1013     | 23                                         | 9.9839        | 0.9116(0.1224-6.7866)    |
| INFECTION, LABIA, SEE ALSO VULVITIS                      | 0                                       | 0          | 3                                          | 0.7064        | 0(0-Inf)                 |
| INFECTION, LACRIMAL                                      | 1                                       | 7.7952     | 2                                          | 0.6827        | 11.4176(0.9982-130.5929) |
| INFECTION, LACRIMAL SAC                                  | 0                                       | 0          | 1                                          | 0.398         | 0(0-Inf)                 |
| INFECTION, LIP                                           | 0                                       | 0          | 9                                          | 2.1998        | 0(0-Inf)                 |
| INFECTION, LISTERIA MONOCYTOGENES                        | 0                                       | 0          | 3                                          | 5.4885        | 0(0-Inf)                 |
| INFECTION, LOWER EXTREMITY                               | 6                                       | 44.8814    | 109                                        | 33.8294       | 1.3267(0.5814-3.0276)    |
| INFECTION, LUNG, ATYPICAL MYCOBACTERIUM                  | 0                                       | 0          | 9                                          | 5.5963        | 0(0-Inf)                 |
| INFECTION, LUNG, FUNGUS                                  | 0                                       | 0          | 2                                          | 0.5475        | 0(0-Inf)                 |
| INFECTION, LUNG, MYCOBACTERIUM AVIUM                     | 0                                       | 0          | 15                                         | 6.7503        | 0(0-Inf)                 |
| INFECTION, LUNG, MYCOBACTERIUM, NOS                      | 1                                       | 7.7336     | 10                                         | 3.2682        | 2.3663(0.2986-18.7523)   |
| INFECTION, LUNG, NOCARDIA                                | 0                                       | 0          | 3                                          | 1.5756        | 0(0-Inf)                 |
| INFECTION, LUNG, NOS                                     | 4                                       | 45.3922    | 47                                         | 28.3256       | 1.6025(0.575-4.4662)     |
| INFECTION, LYMPH NODE                                    | 0                                       | 0          | 3                                          | 1.1942        | 0(0-Inf)                 |
| INFECTION, MASTOID CAVITY                                | 1                                       | 7.3474     | 7                                          | 2.0902        | 3.5152(0.4244-29.1172)   |
| INFECTION, MASTOID CAVITY, P.O.                          | 0                                       | 0          | 5                                          | 1.3717        | 0(0-Inf)                 |
| INFECTION, MEDIASTINUM                                   | 0                                       | 0          | 1                                          | 0.8877        | 0(0-Inf)                 |
| INFECTION, MEIBOMIAN CYST                                | 0                                       | 0          | 1                                          | 0.4751        | 0(0-Inf)                 |
| INFECTION, MEIBOMIAN GLAND                               | 0                                       | 0          | 89                                         | 21.4898       | 0(0-Inf)                 |
| INFECTION, METATARSOPHALANGEAL                           | 0                                       | 0          | 4                                          | 1.0119        | 0(0-Inf)                 |
| INFECTION, MORAXELLA                                     | 0                                       | 0          | 1                                          | 0.8528        | 0(0-Inf)                 |
| INFECTION, MOUTH                                         | 0                                       | 0          | 24                                         | 9.5447        | 0(0-Inf)                 |
| INFECTION, MOUTH, YEAST                                  | 0                                       | 0          | 3                                          | 1.2104        | 0(0-Inf)                 |
| INFECTION, MUSCLE, NEC                                   | 0                                       | 0          | 7                                          | 1.837         | 0(0-Inf)                 |
| INFECTION, MYCOBACTERIUM AVIUM, NOS                      | 2                                       | 21.6084    | 27                                         | 15.2572       | 1.4163(0.335-5.9884)     |

| Description                                                                 | No. of Positive Cases with Disease Code | Case Rate* | No. of Positive Controls with Disease Code | Control Rate* | Relative Risk (95%CI)    |
|-----------------------------------------------------------------------------|-----------------------------------------|------------|--------------------------------------------|---------------|--------------------------|
| INFECTION, MYCOBACTERIUM FORTUITUM                                          | 0                                       | 0          | 1                                          | 0.4048        | 0(0-Inf)                 |
| INFECTION, MYCOBACTERIUM NOS (MOTT)                                         | 4                                       | 29.3165    | 11                                         | 3.2312        | 9.0729(2.8344-29.0421)   |
| INFECTION, MYCOBACTERIUM TUBERCULOSIS, SEE TUBERCULOSIS (LUNG#)             | 1                                       | 13.997     | 1                                          | 0.8069        | 17.3472(1.0494-286.7602) |
| INFECTION, MYCOPLASMA                                                       | 0                                       | 0          | 10                                         | 2.6017        | 0(0-Inf)                 |
| INFECTION, MYCOTIC                                                          | 1                                       | 8.0267     | 6                                          | 2.1656        | 3.7065(0.4388-31.305)    |
| INFECTION, NAIL, CANDIDA/MONILIA                                            | 0                                       | 0          | 11                                         | 2.4322        | 0(0-Inf)                 |
| INFECTION, NAIL, INGROWING                                                  | 5                                       | 37.911     | 138                                        | 43.9367       | 0.8629(0.3527-2.1108)    |
| INFECTION, NAIL, NOS                                                        | 2                                       | 13.9058    | 132                                        | 33.607        | 0.4138(0.1022-1.6746)    |
| INFECTION, NASOPHARYNX, NOS                                                 | 0                                       | 0          | 4                                          | 0.9751        | 0(0-Inf)                 |
| INFECTION, NEC / NOS (RECURRENT)                                            | 0                                       | 0          | 23                                         | 9.4818        | 0(0-Inf)                 |
| INFECTION, NIPPLE, NOS                                                      | 0                                       | 0          | 2                                          | 0.4709        | 0(0-Inf)                 |
| INFECTION, NOCARDIA                                                         | 0                                       | 0          | 4                                          | 1.6246        | 0(0-Inf)                 |
| INFECTION, NOS (GENERALIZED) SEE ALSO SEPTICEMIA                            | 1                                       | 9.3381     | 27                                         | 12.19         | 0.766(0.1036-5.6626)     |
| INFECTION, NOS (PARASITE#)                                                  | 0                                       | 0          | 7                                          | 2.7986        | 0(0-Inf)                 |
| INFECTION, NOSE                                                             | 0                                       | 0          | 25                                         | 5.9571        | 0(0-Inf)                 |
| INFECTION, OPERATION WOUND                                                  | 0                                       | 0          | 10                                         | 2.4675        | 0(0-Inf)                 |
| INFECTION, PANCREAS                                                         | 0                                       | 0          | 1                                          | 0.8881        | 0(0-Inf)                 |
| INFECTION, PARASITIC, NOS                                                   | 0                                       | 0          | 2                                          | 0.7896        | 0(0-Inf)                 |
| INFECTION, PAROTID GLAND                                                    | 0                                       | 0          | 6                                          | 1.8812        | 0(0-Inf)                 |
| INFECTION, PASTEURELLA TULARENSIS                                           | 0                                       | 0          | 1                                          | 0.2354        | 0(0-Inf)                 |
| INFECTION, PENIS                                                            | 0                                       | 0          | 9                                          | 2.7606        | 0(0-Inf)                 |
| INFECTION, PERIAPICAL                                                       | 11                                      | 83.7942    | 346                                        | 110.844       | 0.756(0.4142-1.3797)     |
| INFECTION, PERIODONTAL (PERIDENTAL)                                         | 35                                      | 253.0024   | 895                                        | 232.0844      | 1.0901(0.7769-1.5296)    |
| INFECTION, PIEDRAIA HORTAE                                                  | 0                                       | 0          | 1                                          | 0.3526        | 0(0-Inf)                 |
| INFECTION, PILONIDAL                                                        | 0                                       | 0          | 1                                          | 0.2729        | 0(0-Inf)                 |
| INFECTION, PNEUMOCOCCAL                                                     | 0                                       | 0          | 3                                          | 1.5755        | 0(0-Inf)                 |
| INFECTION, POST-OPERATIVE                                                   | 2                                       | 15.7292    | 142                                        | 48.8383       | 0.3221(0.0797-1.302)     |
| INFECTION, POSTOPERATIVE, FROM NON-ABSORBABLE SURGICAL MATERIAL (MESH, ETC) | 0                                       | 0          | 6                                          | 2.1462        | 0(0-Inf)                 |
| INFECTION, PREPUCE                                                          | 0                                       | 0          | 1                                          | 6.4812        | 0(0-Inf)                 |
| INFECTION, PROSTATE, SEE ALSO PROSTATITIS                                   | 0                                       | 0          | 4                                          | 3.5536        | 0(0-Inf)                 |
| INFECTION, PROSTHESIS, PENILE                                               | 0                                       | 0          | 1                                          | 0.2729        | 0(0-Inf)                 |
| INFECTION, PROSTHETIC DEVICE, INTERNAL, ORTHOPEDIC, SEE ALSO BY SITE        | 0                                       | 0          | 3                                          | 0.8711        | 0(0-Inf)                 |
| INFECTION, PROTEUS VULGARIS, NEC                                            | 0                                       | 0          | 1                                          | 0.4048        | 0(0-Inf)                 |
| INFECTION, PSEUDOMONAS MALLEI                                               | 0                                       | 0          | 1                                          | 0.398         | 0(0-Inf)                 |
| INFECTION, PSEUDOMONAS, NOS                                                 | 1                                       | 9.8465     | 38                                         | 18.5773       | 0.53(0.0726-3.8718)      |
| INFECTION, PULMONARY COCCI                                                  | 0                                       | 0          | 1                                          | 0.3526        | 0(0-Inf)                 |
| INFECTION, PULP, TOOTH                                                      | 0                                       | 0          | 3                                          | 0.7175        | 0(0-Inf)                 |



| Description                                                     | No. of Positive Cases with Disease Code | Case Rate* | No. of Positive Controls with Disease Code | Control Rate* | Relative Risk (95%CI)    |
|-----------------------------------------------------------------|-----------------------------------------|------------|--------------------------------------------|---------------|--------------------------|
| INFECTION, RECTUM                                               | 0                                       | 0          | 8                                          | 2.5315        | 0(0-Inf)                 |
| INFECTION, RESPIRATORY SYNCYTIAL VIRAL(URI)                     | 0                                       | 0          | 7                                          | 2.1264        | 0(0-Inf)                 |
| INFECTION, RESPIRATORY TRACT, VIRAL (LOWER # )                  | 2                                       | 14.4802    | 38                                         | 10.9127       | 1.3269(0.3183-5.5321)    |
| INFECTION, RESPIRATORY, ACUTE (UPPER TRACT#)                    | 6                                       | 45.7161    | 101                                        | 23.4857       | 1.9466(0.8507-4.4539)    |
| INFECTION, RESPIRATORY, NOS (LOWER TRACT #)                     | 40                                      | 348.4359   | 717                                        | 280.8041      | 1.2409(0.9014-1.7081)    |
| INFECTION, SALIVARY GLAND, NOS                                  | 0                                       | 0          | 5                                          | 1.5592        | 0(0-Inf)                 |
| INFECTION, SALMONELLA, NOS SEE ALSO SALMONELLOSIS               | 0                                       | 0          | 13                                         | 3.6007        | 0(0-Inf)                 |
| INFECTION, SCROTUM                                              | 0                                       | 0          | 5                                          | 1.3251        | 0(0-Inf)                 |
| INFECTION, SEBACEOUS GLAND                                      | 0                                       | 0          | 1                                          | 0.4048        | 0(0-Inf)                 |
| INFECTION, SECONDARY BURN, FRACTURE, OR OPEN WOUND              | 0                                       | 0          | 3                                          | 0.9166        | 0(0-Inf)                 |
| INFECTION, SHIGELLA, NOS                                        | 0                                       | 0          | 1                                          | 0.398         | 0(0-Inf)                 |
| INFECTION, SHOULDER, JOINT                                      | 4                                       | 50.056     | 12                                         | 8.1797        | 6.1195(1.9532-19.1732)   |
| INFECTION, SHOULDER, WITH ORTHOPEDIC DEVICE, NOT TOTAL JOINT    | 0                                       | 0          | 1                                          | 0.4048        | 0(0-Inf)                 |
| INFECTION, SKENE'S DUCT OR GLAND                                | 0                                       | 0          | 2                                          | 0.7961        | 0(0-Inf)                 |
| INFECTION, SKIN, FUNGUS                                         | 1                                       | 7.5326     | 74                                         | 23.5229       | 0.3202(0.0444-2.308)     |
| INFECTION, SKIN, MYCOTIC                                        | 0                                       | 0          | 1                                          | 0.8528        | 0(0-Inf)                 |
| INFECTION, SKIN, NOS                                            | 7                                       | 48.828     | 156                                        | 40.0366       | 1.2196(0.5704-2.6078)    |
| INFECTION, SKIN, YEAST                                          | 1                                       | 8.1984     | 29                                         | 10.6208       | 0.7719(0.1047-5.6933)    |
| INFECTION, SOFT TISSUE, NEC/NOS                                 | 0                                       | 0          | 23                                         | 8.8795        | 0(0-Inf)                 |
| INFECTION, SPINAL CORD                                          | 0                                       | 0          | 1                                          | 0.4048        | 0(0-Inf)                 |
| INFECTION, SPINE, JOINT                                         | 0                                       | 0          | 1                                          | 0.234         | 0(0-Inf)                 |
| INFECTION, SPIROCHETAL, NEC                                     | 0                                       | 0          | 2                                          | 0.7896        | 0(0-Inf)                 |
| INFECTION, STAPHYLOCOCCAL, NEC (COAGULASE POSITIVE OR NEGATIVE) | 11                                      | 81.8542    | 311                                        | 95.8512       | 0.854(0.4673-1.5605)     |
| INFECTION, STREPTOCOCCAL, NEC                                   | 4                                       | 28.7695    | 142                                        | 33.2976       | 0.864(0.3191-2.3396)     |
| INFECTION, STRONGYLOIDES                                        | 0                                       | 0          | 1                                          | 0.2354        | 0(0-Inf)                 |
| INFECTION, STUMP, SURGICAL                                      | 2                                       | 22.7793    | 5                                          | 3.011         | 7.5654(1.4472-39.5499)   |
| INFECTION, SUBCLINICAL PAPILLOMA VIRUS (SPI)                    | 0                                       | 0          | 1                                          | 0.234         | 0(0-Inf)                 |
| INFECTION, SUBCUTANEOUS TISSUE                                  | 0                                       | 0          | 5                                          | 1.3508        | 0(0-Inf)                 |
| INFECTION, SUBLINGUAL GLAND                                     | 0                                       | 0          | 1                                          | 2.4857        | 0(0-Inf)                 |
| INFECTION, SUBMANDIBULAR GLAND                                  | 0                                       | 0          | 8                                          | 3.5407        | 0(0-Inf)                 |
| INFECTION, SUBMAXILLARY GLAND                                   | 0                                       | 0          | 2                                          | 0.4854        | 0(0-Inf)                 |
| INFECTION, SWEAT GLAND                                          | 0                                       | 0          | 1                                          | 0.2729        | 0(0-Inf)                 |
| INFECTION, SYSTEMIC, NOS                                        | 0                                       | 0          | 2                                          | 0.4853        | 0(0-Inf)                 |
| INFECTION, TEMPOROMANDIBULAR JOINT (TMJ)                        | 0                                       | 0          | 1                                          | 0.405         | 0(0-Inf)                 |
| INFECTION, TENDON                                               | 0                                       | 0          | 4                                          | 1.0588        | 0(0-Inf)                 |
| INFECTION, TESTIS                                               | 0                                       | 0          | 1                                          | 2.4859        | 0(0-Inf)                 |
| INFECTION, THROAT, NOS                                          | 1                                       | 7.6193     | 1                                          | 0.2398        | 31.7697(1.8719-539.2042) |
| INFECTION, THROAT, STREPTOCOCCAL                                | 3                                       | 30.3398    | 197                                        | 51.7484       | 0.5863(0.1872-1.8362)    |

| Description                                       | No. of Positive Cases with Disease Code | Case Rate* | No. of Positive Controls with Disease Code | Control Rate* | Relative Risk (95%CI)    |
|---------------------------------------------------|-----------------------------------------|------------|--------------------------------------------|---------------|--------------------------|
| INFECTION, THROAT, VIRAL                          | 0                                       | 0          | 3                                          | 1.0728        | 0(0-Inf)                 |
| INFECTION, TOE, JOINT                             | 0                                       | 0          | 5                                          | 2.7042        | 0(0-Inf)                 |
| INFECTION, TOE, NOS                               | 5                                       | 47.8267    | 109                                        | 50.9824       | 0.9381(0.3819-2.3046)    |
| INFECTION, TONGUE                                 | 0                                       | 0          | 2                                          | 0.7897        | 0(0-Inf)                 |
| INFECTION, TONSIL                                 | 0                                       | 0          | 9                                          | 2.4959        | 0(0-Inf)                 |
| INFECTION, TOOTH                                  | 37                                      | 288.5425   | 883                                        | 216.8802      | 1.3304(0.9565-1.8506)    |
| INFECTION, TOOTH, SOCKET                          | 0                                       | 0          | 4                                          | 1.3221        | 0(0-Inf)                 |
| INFECTION, TRICHOPHYTON, SEE ALSO DERMATOPHYTOSIS | 0                                       | 0          | 7                                          | 1.885         | 0(0-Inf)                 |
| INFECTION, TRUNK                                  | 0                                       | 0          | 12                                         | 4.3557        | 0(0-Inf)                 |
| INFECTION, UMBILICUS                              | 0                                       | 0          | 8                                          | 1.9119        | 0(0-Inf)                 |
| INFECTION, UPPER EXTREMITY                        | 2                                       | 13.9989    | 95                                         | 23.0371       | 0.6077(0.1494-2.4714)    |
| INFECTION, UPPER RESPIRATORY, ACUTE               | 1                                       | 7.3285     | 122                                        | 28.7773       | 0.2547(0.0355-1.8251)    |
| INFECTION, UPPER RESPIRATORY, BACTERIAL           | 4                                       | 30.4003    | 11                                         | 2.4115        | 12.6066(3.9264-40.476)   |
| INFECTION, UPPER RESPIRATORY, HEMOPHILUS          | 1                                       | 10.0417    | 1                                          | 0.2717        | 36.9574(2.187-624.5288)  |
| INFECTION, UPPER RESPIRATORY, NOS--URI            | 228                                     | 2041.196   | 6730                                       | 2151.0564     | 0.9489(0.8313-1.0832)    |
| INFECTION, UPPER RESPIRATORY, STREPTOCOCCUS       | 0                                       | 0          | 29                                         | 9.3163        | 0(0-Inf)                 |
| INFECTION, UPPER RESPIRATORY, SUBACUTE            | 0                                       | 0          | 2                                          | 0.7961        | 0(0-Inf)                 |
| INFECTION, UPPER RESPIRATORY, VIRAL, ACUTE        | 0                                       | 0          | 14                                         | 3.2724        | 0(0-Inf)                 |
| INFECTION, UPPER RESPIRATORY, VIRAL--URIV         | 101                                     | 884.3696   | 3116                                       | 836.6753      | 1.057(0.8665-1.2893)     |
| INFECTION, UREAPLASMA UREALYTICUM, NOS            | 0                                       | 0          | 12                                         | 3.2349        | 0(0-Inf)                 |
| INFECTION, URETER                                 | 0                                       | 0          | 3                                          | 0.7411        | 0(0-Inf)                 |
| INFECTION, URETHRA, SEE ALSO URETHRITIS           | 0                                       | 0          | 2                                          | 0.7052        | 0(0-Inf)                 |
| INFECTION, URINARY, ACUTE                         | 8                                       | 56.7727    | 103                                        | 27.5052       | 2.0641(1.0008-4.2569)    |
| INFECTION, URINARY, CHRONIC                       | 6                                       | 48.1228    | 125                                        | 43.9944       | 1.0938(0.4807-2.489)     |
| INFECTION, URINARY, E. COLI                       | 38                                      | 280.1248   | 693                                        | 168.1186      | 1.6662(1.2003-2.3131)    |
| INFECTION, URINARY, ENTEROCOCCAL                  | 5                                       | 73.2962    | 103                                        | 89.4992       | 0.819(0.3332-2.0127)     |
| INFECTION, URINARY, KLEBSIELLA                    | 7                                       | 54.3168    | 86                                         | 28.3623       | 1.9151(0.8824-4.1564)    |
| INFECTION, URINARY, PROTEUS                       | 3                                       | 21.2306    | 65                                         | 15.0724       | 1.4086(0.4405-4.5038)    |
| INFECTION, URINARY, PSEUDOMONAS                   | 4                                       | 35.6674    | 46                                         | 19.2291       | 1.8549(0.6643-5.1788)    |
| INFECTION, URINARY, RECURRENT                     | 38                                      | 292.1071   | 782                                        | 238.8717      | 1.2229(0.8819-1.6956)    |
| INFECTION, URINARY--UTI                           | 207                                     | 2005.671   | 4966                                       | 1997.493      | 1.0041(0.8734-1.1544)    |
| INFECTION, VAGINA, SEE ALSO VAGINITIS             | 0                                       | 0          | 14                                         | 7.5936        | 0(0-Inf)                 |
| INFECTION, VASCULAR GRAFT OR SHUNT                | 0                                       | 0          | 2                                          | 0.8097        | 0(0-Inf)                 |
| INFECTION, VESICAL, SEE ALSO CYSTITIS             | 0                                       | 0          | 1                                          | 0.8273        | 0(0-Inf)                 |
| INFECTION, VIRAL, NOS                             | 7                                       | 52.4       | 211                                        | 50.0319       | 1.0473(0.4922-2.2285)    |
| INFECTION, VULVOVAGINAL, YEAST                    | 1                                       | 6.9569     | 3                                          | 0.6763        | 10.2865(1.0242-103.3125) |
| INFECTION, WOUND, POSTOPERATIVE                   | 10                                      | 80.9928    | 314                                        | 112.3211      | 0.7211(0.3837-1.3552)    |
| INFECTION, WOUND, POST-TRAUMATIC                  | 0                                       | 0          | 12                                         | 2.8889        | 0(0-Inf)                 |
| INFECTION, WRIST, JOINT                           | 1                                       | 11.9459    | 12                                         | 7.7769        | 1.5361(0.1982-11.9031)   |

| Description                                                              | No. of Positive Cases with Disease Code | Case Rate* | No. of Positive Controls with Disease Code | Control Rate* | Relative Risk (95%CI)    |
|--------------------------------------------------------------------------|-----------------------------------------|------------|--------------------------------------------|---------------|--------------------------|
| INFECTION, WRIST, WITH ORTHOPEDIC DEVICE, NOT TOTAL JOINT                | 0                                       | 0          | 2                                          | 1.7771        | 0(0-Inf)                 |
| INFECTION, YEAST, CUTANEOUS                                              | 0                                       | 0          | 9                                          | 3.633         | 0(0-Inf)                 |
| INFECTION, YEAST, NOS                                                    | 4                                       | 29.1436    | 127                                        | 36.9321       | 0.7891(0.2909-2.1404)    |
| INFECTION, YERSINIA (COLON)                                              | 0                                       | 0          | 1                                          | 1.909         | 0(0-Inf)                 |
| INFERTILITY, FEMALE (IF DUE TO STERILIZATION SEE RESTORATION)            | 0                                       | 0          | 23                                         | 34.8319       | 0(0-Inf)                 |
| INFERTILITY, MALE (IF DUE TO STERILIZATION SEE RESTORATION)              | 1                                       | 29.6464    | 10                                         | 6.1671        | 4.8072(0.6104-37.8581)   |
| INFESTATION, ASCARIS LUMBRICOIDES                                        | 0                                       | 0          | 2                                          | 0.4709        | 0(0-Inf)                 |
| INFESTATION, CUTANEOUS LARVA MIGRANS, NOS                                | 0                                       | 0          | 1                                          | 0.398         | 0(0-Inf)                 |
| INFESTATION, DEMODEX FOLLICULORUM                                        | 1                                       | 10.812     | 18                                         | 10.0651       | 1.0742(0.1427-8.0889)    |
| INFESTATION, ENTEROBIUS VERMICULARIS                                     | 0                                       | 0          | 1                                          | 0.8879        | 0(0-Inf)                 |
| INFESTATION, HOOKWORM                                                    | 0                                       | 0          | 12                                         | 3.1617        | 0(0-Inf)                 |
| INFESTATION, LOUSE (LICE), SEE ALSO PEDICULUS                            | 1                                       | 7.6039     | 5                                          | 1.2057        | 6.3066(0.7182-55.3779)   |
| INFESTATION, MITES (EXCEPT SCABIETIC)                                    | 0                                       | 0          | 1                                          | 0.2729        | 0(0-Inf)                 |
| INFESTATION, PARASITE, INTESTINAL, NOS                                   | 0                                       | 0          | 3                                          | 0.8034        | 0(0-Inf)                 |
| INFESTATION, PINWORM                                                     | 0                                       | 0          | 1                                          | 0.4051        | 0(0-Inf)                 |
| INFESTATION, SAND FLEA                                                   | 0                                       | 0          | 1                                          | 0.2354        | 0(0-Inf)                 |
| INFESTATION, TAENIA SAGINATA                                             | 0                                       | 0          | 1                                          | 0.398         | 0(0-Inf)                 |
| INFESTATION, TAPEWORM, NOS                                               | 0                                       | 0          | 1                                          | 0.4751        | 0(0-Inf)                 |
| INFESTATION, TICK                                                        | 0                                       | 0          | 2                                          | 1.1972        | 0(0-Inf)                 |
| INFESTATION, TRICHURIS TRICHIURA                                         | 0                                       | 0          | 3                                          | 1.9317        | 0(0-Inf)                 |
| INFESTATION, WORMS, NOS                                                  | 0                                       | 0          | 1                                          | 0.2729        | 0(0-Inf)                 |
| INFILTRATE, CORNEAL                                                      | 2                                       | 14.0599    | 20                                         | 4.88          | 2.8811(0.6666-12.4533)   |
| INFILTRATE, EYELID                                                       | 0                                       | 0          | 1                                          | 0.2354        | 0(0-Inf)                 |
| INFILTRATE, GASTROINTESTINAL (EOSINOPHILIC)                              | 0                                       | 0          | 2                                          | 0.5475        | 0(0-Inf)                 |
| INFILTRATE, JESSNER'S                                                    | 0                                       | 0          | 2                                          | 0.8723        | 0(0-Inf)                 |
| INFILTRATE, KIDNEY                                                       | 1                                       | 9.1857     | 1                                          | 0.4524        | 20.3035(1.2277-335.7883) |
| INFILTRATE, LIVER, FATTY                                                 | 1                                       | 6.9624     | 35                                         | 8.5412        | 0.8152(0.1111-5.9783)    |
| INFILTRATE, LIVER, NEC, SEE ALSO CIRRHOSIS, LIVER                        | 0                                       | 0          | 2                                          | 0.5475        | 0(0-Inf)                 |
| INFILTRATE, LUNG, LYMPHOCYTIC/PLASMACYTIC                                | 0                                       | 0          | 2                                          | 0.7896        | 0(0-Inf)                 |
| INFILTRATE, LYMPHATIC, NEC, SEE ALSO LEUKEMIA, LYMPHATIC                 | 0                                       | 0          | 1                                          | 0.234         | 0(0-Inf)                 |
| INFILTRATE, MARGINAL, CORNEAL                                            | 0                                       | 0          | 9                                          | 2.4214        | 0(0-Inf)                 |
| INFILTRATE, PNEUMONIA                                                    | 0                                       | 0          | 2                                          | 2.9791        | 0(0-Inf)                 |
| INFILTRATE, PULMONARY, EOSINOPHILIC                                      | 0                                       | 0          | 1                                          | 0.4751        | 0(0-Inf)                 |
| INFILTRATE, PULMONARY, NOS                                               | 30                                      | 276.4278   | 624                                        | 271.867       | 1.0168(0.7042-1.4682)    |
| INFILTRATE, SKIN, LYMPHOCYTIC, BENIGN                                    | 0                                       | 0          | 58                                         | 13.8831       | 0(0-Inf)                 |
| INFILTRATE, VEIN, DUE TO INTRODUCTION OF DIAGNOSTIC OR THERAPEUTIC AGENT | 0                                       | 0          | 2                                          | 0.4709        | 0(0-Inf)                 |

| Description                                         | No. of Positive Cases with Disease Code |            | No. of Positive Controls with Disease Code |               | Relative Risk (95%CI)    |
|-----------------------------------------------------|-----------------------------------------|------------|--------------------------------------------|---------------|--------------------------|
|                                                     |                                         | Case Rate* |                                            | Control Rate* |                          |
| INFLAMMATION, ANTRUM, STOMACH                       | 0                                       | 0          | 6                                          | 2.6215        | 0(0-Inf)                 |
| INFLAMMATION, BRAIN                                 | 0                                       | 0          | 1                                          | 0.234         | 0(0-Inf)                 |
| INFLAMMATION, BREAST                                | 1                                       | 13.8971    | 22                                         | 9.9194        | 1.401(0.1872-10.4857)    |
| INFLAMMATION, CHRONIC, BREAST                       | 0                                       | 0          | 1                                          | 0.234         | 0(0-Inf)                 |
| INFLAMMATION, COLON, SEE ALSO ENTERITIS             | 2                                       | 14.758     | 27                                         | 8.1542        | 1.8099(0.4272-7.6678)    |
| INFLAMMATION, CONNECTIVE TISSUE, NEC                | 0                                       | 0          | 2                                          | 0.7897        | 0(0-Inf)                 |
| INFLAMMATION, DISC                                  | 0                                       | 0          | 2                                          | 1.1616        | 0(0-Inf)                 |
| INFLAMMATION, DUODENUM                              | 0                                       | 0          | 4                                          | 1.8405        | 0(0-Inf)                 |
| INFLAMMATION, EAR, EXTERNAL                         | 0                                       | 0          | 21                                         | 4.8024        | 0(0-Inf)                 |
| INFLAMMATION, EAR, INNER                            | 0                                       | 0          | 2                                          | 0.5709        | 0(0-Inf)                 |
| INFLAMMATION, EAR, MIDDLE, SEE ALSO OTITIS MEDIA    | 0                                       | 0          | 1                                          | 0.2355        | 0(0-Inf)                 |
| INFLAMMATION, ESOPHAGUS                             | 1                                       | 7.4073     | 11                                         | 3.449         | 2.1477(0.2743-16.8177)   |
| INFLAMMATION, EUSTACHIAN TUBE                       | 0                                       | 0          | 4                                          | 1.3532        | 0(0-Inf)                 |
| INFLAMMATION, EYE                                   | 2                                       | 15.5906    | 39                                         | 12.9576       | 1.2032(0.289-5.0092)     |
| INFLAMMATION, EYELID                                | 3                                       | 20.8701    | 24                                         | 5.9499        | 3.5076(1.0457-11.7657)   |
| INFLAMMATION, FASCIA                                | 0                                       | 0          | 3                                          | 1.2702        | 0(0-Inf)                 |
| INFLAMMATION, GENITAL, FEMALE                       | 0                                       | 0          | 16                                         | 6.9603        | 0(0-Inf)                 |
| INFLAMMATION, GENITAL, MALE                         | 0                                       | 0          | 8                                          | 2.5956        | 0(0-Inf)                 |
| INFLAMMATION, GLOTTIS                               | 0                                       | 0          | 6                                          | 1.9678        | 0(0-Inf)                 |
| INFLAMMATION, GUM                                   | 2                                       | 14.0481    | 42                                         | 11.0656       | 1.2695(0.3056-5.2737)    |
| INFLAMMATION, JAW                                   | 0                                       | 0          | 4                                          | 1.0274        | 0(0-Inf)                 |
| INFLAMMATION, JOINT                                 | 5                                       | 35.2136    | 135                                        | 36.2264       | 0.972(0.3971-2.3796)     |
| INFLAMMATION, KIDNEY, NOS                           | 0                                       | 0          | 1                                          | 0.8877        | 0(0-Inf)                 |
| INFLAMMATION, LACRIMAL GLAND OR DUCT                | 0                                       | 0          | 4                                          | 1.0352        | 0(0-Inf)                 |
| INFLAMMATION, LACRIMAL SAC                          | 0                                       | 0          | 1                                          | 1.9094        | 0(0-Inf)                 |
| INFLAMMATION, LARYNX                                | 0                                       | 0          | 5                                          | 1.856         | 0(0-Inf)                 |
| INFLAMMATION, LIGAMENT                              | 1                                       | 6.9943     | 2                                          | 0.4455        | 15.6992(1.3462-183.0769) |
| INFLAMMATION, LIP                                   | 1                                       | 7.5057     | 11                                         | 3.4952        | 2.1474(0.2741-16.8225)   |
| INFLAMMATION, LIVER, SEE ALSO HEPATITIS             | 0                                       | 0          | 5                                          | 1.1945        | 0(0-Inf)                 |
| INFLAMMATION, LUNG                                  | 2                                       | 17.7119    | 12                                         | 4.9719        | 3.5624(0.7881-16.1031)   |
| INFLAMMATION, LYMPH GLAND                           | 0                                       | 0          | 50                                         | 12.7974       | 0(0-Inf)                 |
| INFLAMMATION, MAXILLARY SINUS, ACUTE                | 0                                       | 0          | 1                                          | 0.2354        | 0(0-Inf)                 |
| INFLAMMATION, NASOPHARYNX, SEE ALSO NASOPHARYNGITIS | 0                                       | 0          | 1                                          | 0.2729        | 0(0-Inf)                 |
| INFLAMMATION, NOSE                                  | 0                                       | 0          | 12                                         | 4.4563        | 0(0-Inf)                 |
| INFLAMMATION, OPTIC NERVE                           | 0                                       | 0          | 1                                          | 0.2354        | 0(0-Inf)                 |
| INFLAMMATION, ORBIT                                 | 0                                       | 0          | 1                                          | 0.8877        | 0(0-Inf)                 |
| INFLAMMATION, PAROTID GLAND                         | 0                                       | 0          | 5                                          | 1.5653        | 0(0-Inf)                 |
| INFLAMMATION, PENIS                                 | 3                                       | 55.9666    | 12                                         | 11.0098       | 5.0833(1.4207-18.1882)   |
| INFLAMMATION, PHARYNX                               | 0                                       | 0          | 1                                          | 0.8877        | 0(0-Inf)                 |
| INFLAMMATION, PREPUCE                               | 0                                       | 0          | 1                                          | 0.3526        | 0(0-Inf)                 |

| Description                                         | No. of Positive Cases with Disease Code | Case Rate* | No. of Positive Controls with Disease Code | Control Rate* | Relative Risk (95%CI)   |
|-----------------------------------------------------|-----------------------------------------|------------|--------------------------------------------|---------------|-------------------------|
| INFLAMMATION, RECTAL (EXTRARECTAL)                  | 0                                       | 0          | 8                                          | 2.3577        | 0(0-Inf)                |
| INFLAMMATION, RETROPERITONEAL                       | 0                                       | 0          | 1                                          | 0.398         | 0(0-Inf)                |
| INFLAMMATION, ROTATOR CUFF                          | 0                                       | 0          | 7                                          | 2.3181        | 0(0-Inf)                |
| INFLAMMATION, SACROILIAC                            | 1                                       | 8.5676     | 13                                         | 5.1647        | 1.6589(0.2148-12.8141)  |
| INFLAMMATION, SALIVARY GLAND OR DUCT                | 0                                       | 0          | 7                                          | 1.6113        | 0(0-Inf)                |
| INFLAMMATION, SCROTUM                               | 0                                       | 0          | 2                                          | 4.9721        | 0(0-Inf)                |
| INFLAMMATION, SINUS                                 | 1                                       | 11.3607    | 4                                          | 1.0803        | 10.5166(1.1418-96.8667) |
| INFLAMMATION, SKIN, NOS                             | 9                                       | 66.4642    | 285                                        | 86.3247       | 0.7699(0.3959-1.4973)   |
| INFLAMMATION, SPERMATIC CORD                        | 0                                       | 0          | 1                                          | 0.4751        | 0(0-Inf)                |
| INFLAMMATION, SPINE, SEE ALSO SPONDYLITIS           | 0                                       | 0          | 2                                          | 0.4708        | 0(0-Inf)                |
| INFLAMMATION, TEMPOROMANDIBULAR JOINT (TMJ)         | 0                                       | 0          | 2                                          | 0.8098        | 0(0-Inf)                |
| INFLAMMATION, TENDON                                | 1                                       | 7.5806     | 9                                          | 2.078         | 3.648(0.454-29.3121)    |
| INFLAMMATION, THROAT                                | 0                                       | 0          | 3                                          | 0.8457        | 0(0-Inf)                |
| INFLAMMATION, TONGUE                                | 0                                       | 0          | 14                                         | 3.6748        | 0(0-Inf)                |
| INFLAMMATION, TYMPANUM                              | 0                                       | 0          | 2                                          | 0.7896        | 0(0-Inf)                |
| INFLAMMATION, VEIN, NOS                             | 0                                       | 0          | 4                                          | 1.1121        | 0(0-Inf)                |
| INFLAMMATION, VOCAL CORD                            | 0                                       | 0          | 11                                         | 2.5533        | 0(0-Inf)                |
| INFLUENZA, NOS                                      | 13                                      | 91.9761    | 322                                        | 86.9303       | 1.058(0.6067-1.8453)    |
| INFLUENZA, STOMACH                                  | 0                                       | 0          | 2                                          | 0.4853        | 0(0-Inf)                |
| INFLUENZA, VIRAL                                    | 1                                       | 8.0363     | 37                                         | 8.9984        | 0.8931(0.122-6.5382)    |
| INFLUENZA, VIRAL, TYPE A                            | 5                                       | 65.6182    | 94                                         | 69.7372       | 0.9409(0.382-2.318)     |
| INFLUENZA, VIRAL, TYPE B                            | 0                                       | 0          | 2                                          | 0.7053        | 0(0-Inf)                |
| INFREQUENT VOIDER                                   | 0                                       | 0          | 1                                          | 2.4892        | 0(0-Inf)                |
| INFUNDIBULOMA, FOREHEAD                             | 0                                       | 0          | 1                                          | 0.8899        | 0(0-Inf)                |
| INFUNDIBULOMA, NOS, CODE ALSO NEOPLASM, NOS BY SITE | 0                                       | 0          | 1                                          | 0.8877        | 0(0-Inf)                |
| INGROWN, EYELASH                                    | 2                                       | 16.4993    | 14                                         | 3.3687        | 4.8978(1.097-21.8667)   |
| INGROWN, HAIR                                       | 0                                       | 0          | 17                                         | 4.1227        | 0(0-Inf)                |
| INGROWN, TOENAIL                                    | 51                                      | 449.1416   | 1176                                       | 467.3326      | 0.9611(0.7255-1.2731)   |
| INHALATION, CARBON MONOXIDE                         | 0                                       | 0          | 6                                          | 1.5077        | 0(0-Inf)                |
| INHALATION, FUMES, NEC                              | 5                                       | 39.0801    | 20                                         | 5.0055        | 7.8074(2.8948-21.0563)  |
| INHALATION, GAS                                     | 0                                       | 0          | 5                                          | 1.3369        | 0(0-Inf)                |
| INHALATION, SMOKE                                   | 1                                       | 7.2148     | 27                                         | 6.5955        | 1.0939(0.1478-8.0955)   |
| INJECTED EYE                                        | 5                                       | 43.4624    | 96                                         | 38.6723       | 1.1239(0.456-2.7699)    |
| INJECTION ONLY                                      | 15                                      | 139.0812   | 465                                        | 206.9639      | 0.672(0.4014-1.1249)    |
| INJURY, ABDOMEN UNSPECIFIED                         | 0                                       | 0          | 5                                          | 2.7038        | 0(0-Inf)                |
| INJURY, ABDOMINAL WALL, NOS                         | 1                                       | 7.3315     | 15                                         | 3.844         | 1.9073(0.2499-14.5561)  |
| INJURY, ABDOMINAL WALL, SUPERFICIAL, NOS            | 0                                       | 0          | 15                                         | 4.0953        | 0(0-Inf)                |
| INJURY, ACROMIOCLAVICULAR, JOINT, NOS               | 0                                       | 0          | 4                                          | 1.355         | 0(0-Inf)                |
| INJURY, ANKLE, CRUSH, NOS                           | 0                                       | 0          | 2                                          | 0.5458        | 0(0-Inf)                |
| INJURY, ANKLE, JOINT, NOS                           | 0                                       | 0          | 3                                          | 0.8018        | 0(0-Inf)                |

| Description                                      | No. of Positive Cases with Disease Code | Case Rate* | No. of Positive Controls with Disease Code | Control Rate* | Relative Risk (95%CI)    |
|--------------------------------------------------|-----------------------------------------|------------|--------------------------------------------|---------------|--------------------------|
| INJURY, ANKLE, MUSCULOSKELETAL, LATE EFFECT      | 1                                       | 6.944      | 6                                          | 1.5202        | 4.5677(0.5377-38.8047)   |
| INJURY, ANKLE, MUSCULOSKELETAL, NOS              | 0                                       | 0          | 27                                         | 6.3132        | 0(0-Inf)                 |
| INJURY, ANKLE, NOS                               | 7                                       | 51.0944    | 113                                        | 32.8137       | 1.5571(0.7233-3.3523)    |
| INJURY, ANKLE, SUPERFICIAL, INFECTED             | 1                                       | 7.4801     | 5                                          | 1.534         | 4.8761(0.5546-42.869)    |
| INJURY, ANKLE, SUPERFICIAL, NOS                  | 1                                       | 7.0636     | 43                                         | 11.7057       | 0.6034(0.0828-4.3987)    |
| INJURY, ANUS, SUPERFICIAL, NOS                   | 6                                       | 58.7586    | 111                                        | 30.1682       | 1.9477(0.8538-4.4432)    |
| INJURY, AORTA, ABDOMINAL                         | 0                                       | 0          | 1                                          | 0.2728        | 0(0-Inf)                 |
| INJURY, AORTA, THORACIC                          | 0                                       | 0          | 3                                          | 1.0578        | 0(0-Inf)                 |
| INJURY, ARM, LOWER, CRUSH                        | 1                                       | 10.1088    | 0                                          | 0             | 14201831223.041(0-Inf)   |
| INJURY, ARM, LOWER, MUSCULOSKELETAL, LATE EFFECT | 0                                       | 0          | 1                                          | 0.2354        | 0(0-Inf)                 |
| INJURY, ARM, LOWER, MUSCULOSKELETAL, NOS         | 0                                       | 0          | 1                                          | 0.2729        | 0(0-Inf)                 |
| INJURY, ARM, MUSCULOSKELETAL, LATE EFFECT        | 0                                       | 0          | 3                                          | 0.8713        | 0(0-Inf)                 |
| INJURY, ARM, MUSCULOSKELETAL, NOS                | 1                                       | 7.3806     | 9                                          | 2.2535        | 3.2752(0.4092-26.2153)   |
| INJURY, ARM, NOS                                 | 0                                       | 0          | 42                                         | 15.6272       | 0(0-Inf)                 |
| INJURY, ARM, SUPERFICIAL, NOS                    | 1                                       | 7.2283     | 63                                         | 18.5647       | 0.3894(0.0539-2.8137)    |
| INJURY, ARM, UPPER, NOS                          | 0                                       | 0          | 6                                          | 1.3475        | 0(0-Inf)                 |
| INJURY, ARM, UPPER, SUPERFICIAL, INFECTED        | 0                                       | 0          | 2                                          | 0.8723        | 0(0-Inf)                 |
| INJURY, ARM, UPPER, SUPERFICIAL, NOS             | 1                                       | 8.4173     | 14                                         | 3.3673        | 2.4997(0.3249-19.2307)   |
| INJURY, AXILLA, NOS                              | 0                                       | 0          | 2                                          | 0.6774        | 0(0-Inf)                 |
| INJURY, AXILLA, SUPERFICIAL, NOS                 | 0                                       | 0          | 2                                          | 0.5838        | 0(0-Inf)                 |
| INJURY, BACK, MUSCULOSKELETAL, LATE EFFECT       | 0                                       | 0          | 6                                          | 1.4246        | 0(0-Inf)                 |
| INJURY, BACK, MUSCULOSKELETAL, NOS               | 2                                       | 18.3557    | 67                                         | 16.625        | 1.1041(0.2695-4.5225)    |
| INJURY, BACK, NOS                                | 0                                       | 0          | 56                                         | 14.0936       | 0(0-Inf)                 |
| INJURY, BACK, SUPERFICIAL, INFECTED              | 1                                       | 7.8128     | 1                                          | 0.338         | 23.1126(1.3552-394.1808) |
| INJURY, BACK, SUPERFICIAL, LATE EFFECT           | 0                                       | 0          | 2                                          | 1.1613        | 0(0-Inf)                 |
| INJURY, BACK, SUPERFICIAL, NOS                   | 1                                       | 7.5231     | 39                                         | 12.3541       | 0.609(0.0834-4.4484)     |
| INJURY, BIRTH, SPECIFIED, NEC                    | 0                                       | 0          | 1                                          | 0.2729        | 0(0-Inf)                 |
| INJURY, BLADDER, NOS                             | 0                                       | 0          | 5                                          | 3.1249        | 0(0-Inf)                 |
| INJURY, BRACHIAL PLEXUS, LATE EFFECT             | 0                                       | 0          | 1                                          | 0.8877        | 0(0-Inf)                 |
| INJURY, BRACHIAL PLEXUS, NOS                     | 0                                       | 0          | 14                                         | 3.5589        | 0(0-Inf)                 |
| INJURY, BRACHIAL VEIN                            | 1                                       | 6.8899     | 0                                          | 0             | 12236671676.137(0-Inf)   |
| INJURY, BREAST, NOS                              | 0                                       | 0          | 9                                          | 2.4313        | 0(0-Inf)                 |
| INJURY, BREAST, SUPERFICIAL, INFECTED            | 0                                       | 0          | 1                                          | 0.234         | 0(0-Inf)                 |
| INJURY, BREAST, SUPERFICIAL, LATE EFFECT         | 0                                       | 0          | 1                                          | 0.234         | 0(0-Inf)                 |
| INJURY, BREAST, SUPERFICIAL, NOS                 | 1                                       | 6.9312     | 10                                         | 2.4696        | 2.8066(0.3533-22.2969)   |
| INJURY, BUTTOCK, NOS                             | 0                                       | 0          | 14                                         | 4.6478        | 0(0-Inf)                 |
| INJURY, BUTTOCK, SUPERFICIAL, NOS                | 2                                       | 18.454     | 22                                         | 9.7581        | 1.8911(0.4414-8.1028)    |
| INJURY, CAROTID ARTERY                           | 0                                       | 0          | 1                                          | 0.3526        | 0(0-Inf)                 |
| INJURY, CARPAL JOINT, NOS                        | 1                                       | 7.7838     | 0                                          | 0             | 17353982585.3131(0-Inf)  |
| INJURY, CARPOMETACARPAL, JOINT, NOS              | 1                                       | 8.6274     | 2                                          | 0.8267        | 10.4354(0.9217-118.1459) |

| Description                                            | No. of Positive Cases with Disease Code | Case Rate* | No. of Positive Controls with Disease Code | Control Rate* | Relative Risk (95%CI)    |
|--------------------------------------------------------|-----------------------------------------|------------|--------------------------------------------|---------------|--------------------------|
| INJURY, CAUDA EQUINA, NOS                              | 0                                       | 0          | 1                                          | 0.234         | 0(0-Inf)                 |
| INJURY, CERVICAL, HYPEREXTENSION                       | 0                                       | 0          | 23                                         | 6.7182        | 0(0-Inf)                 |
| INJURY, CHEEK, NOS                                     | 0                                       | 0          | 5                                          | 1.2695        | 0(0-Inf)                 |
| INJURY, CHEEK, SUPERFICIAL, NOS                        | 1                                       | 7.2326     | 27                                         | 7.84          | 0.9225(0.1247-6.827)     |
| INJURY, CHEMICAL, CORNEA                               | 0                                       | 0          | 5                                          | 1.2296        | 0(0-Inf)                 |
| INJURY, CHEST WALL, NOS                                | 7                                       | 49.072     | 147                                        | 39.1494       | 1.2535(0.5857-2.6826)    |
| INJURY, CHEST WALL, SUPERFICIAL, NOS                   | 1                                       | 6.9434     | 20                                         | 5.008         | 1.3865(0.1846-10.411)    |
| INJURY, CHEST, CRUSH                                   | 0                                       | 0          | 3                                          | 1.0579        | 0(0-Inf)                 |
| INJURY, CHEST, MUSCULOSKELETAL, LATE EFFECT            | 0                                       | 0          | 1                                          | 0.398         | 0(0-Inf)                 |
| INJURY, CHEST, MUSCULOSKELETAL, NOS                    | 1                                       | 7.1103     | 38                                         | 9.2667        | 0.7673(0.1049-5.6116)    |
| INJURY, COCCYX                                         | 0                                       | 0          | 11                                         | 3.3171        | 0(0-Inf)                 |
| INJURY, CONUS (NON-TRAUMATIC)                          | 1                                       | 11.4026    | 0                                          | 0             | 7489142899.8408(0-Inf)   |
| INJURY, CORONARY ARTERY                                | 0                                       | 0          | 4                                          | 1.8405        | 0(0-Inf)                 |
| INJURY, DEGLOVING, CODE ALSO WOUND OPEN BY SITE        | 0                                       | 0          | 2                                          | 1.1972        | 0(0-Inf)                 |
| INJURY, DIGITAL ARTERY                                 | 1                                       | 7.4133     | 7                                          | 2.2565        | 3.2853(0.3987-27.0691)   |
| INJURY, EAR, LATE EFFECT                               | 0                                       | 0          | 1                                          | 0.398         | 0(0-Inf)                 |
| INJURY, EAR, NOS                                       | 1                                       | 7.3666     | 65                                         | 19.7861       | 0.3723(0.0515-2.6892)    |
| INJURY, EAR, SUPERFICIAL, INFECTED                     | 0                                       | 0          | 5                                          | 1.2652        | 0(0-Inf)                 |
| INJURY, EAR, SUPERFICIAL, LATE EFFECT                  | 0                                       | 0          | 1                                          | 0.4751        | 0(0-Inf)                 |
| INJURY, EAR, SUPERFICIAL, NOS                          | 3                                       | 21.9859    | 80                                         | 23.8932       | 0.9202(0.2897-2.9228)    |
| INJURY, ELBOW, CRUSH, NOS                              | 0                                       | 0          | 1                                          | 1.0363        | 0(0-Inf)                 |
| INJURY, ELBOW, JOINT, NOS                              | 0                                       | 0          | 2                                          | 0.5069        | 0(0-Inf)                 |
| INJURY, ELBOW, MUSCULOSKELETAL, NOS                    | 0                                       | 0          | 4                                          | 1.2087        | 0(0-Inf)                 |
| INJURY, ELBOW, NOS                                     | 4                                       | 28.1151    | 52                                         | 12.6479       | 2.2229(0.7993-6.182)     |
| INJURY, ELBOW, SUPERFICIAL, INFECTED                   | 1                                       | 7.8075     | 3                                          | 1.0373        | 7.5266(0.7619-74.3575)   |
| INJURY, ELBOW, SUPERFICIAL, LATE EFFECT                | 0                                       | 0          | 1                                          | 0.398         | 0(0-Inf)                 |
| INJURY, ELBOW, SUPERFICIAL, NOS                        | 8                                       | 76.1467    | 87                                         | 40.0772       | 1.9(0.9178-3.9331)       |
| INJURY, ESOPHAGUS, LATE EFFECT                         | 0                                       | 0          | 1                                          | 0.4048        | 0(0-Inf)                 |
| INJURY, ESOPHAGUS, NOS                                 | 0                                       | 0          | 10                                         | 5.088         | 0(0-Inf)                 |
| INJURY, EXTREMITY, LOWER, ARTERY, NEC                  | 0                                       | 0          | 1                                          | 0.4048        | 0(0-Inf)                 |
| INJURY, EXTREMITY, LOWER, ARTERY, NOS                  | 0                                       | 0          | 1                                          | 0.398         | 0(0-Inf)                 |
| INJURY, EXTREMITY, LOWER, VASCULAR, LATE EFFECT        | 0                                       | 0          | 1                                          | 0.4049        | 0(0-Inf)                 |
| INJURY, EXTREMITY, UPPER, ARTERY, NOS                  | 0                                       | 0          | 1                                          | 0.398         | 0(0-Inf)                 |
| INJURY, EXTREMITY, UPPER, MUSCULOSKELETAL, LATE EFFECT | 1                                       | 7.8002     | 6                                          | 2.0998        | 3.7148(0.4405-31.3275)   |
| INJURY, EXTREMITY, UPPER, VEIN, NEC                    | 1                                       | 8.4834     | 2                                          | 0.5671        | 14.9591(1.3174-169.8666) |
| INJURY, EYE, LATE EFFECT                               | 0                                       | 0          | 11                                         | 3.6507        | 0(0-Inf)                 |
| INJURY, EYE, NOS                                       | 3                                       | 23.7178    | 48                                         | 12.0247       | 1.9724(0.6112-6.3652)    |
| INJURY, EYE, SUPERFICIAL, NOS                          | 1                                       | 8.8083     | 56                                         | 14.464        | 0.609(0.0841-4.4105)     |
| INJURY, EYEBROW, NOS                                   | 1                                       | 10.6628    | 8                                          | 4.4033        | 2.4215(0.2992-19.5966)   |
| INJURY, EYELID, SUPERFICIAL, NOS                       | 0                                       | 0          | 23                                         | 5.9636        | 0(0-Inf)                 |

| Description                                               | No. of Positive Cases with Disease Code | Case Rate* | No. of Positive Controls with Disease Code | Control Rate* | Relative Risk (95%CI)    |
|-----------------------------------------------------------|-----------------------------------------|------------|--------------------------------------------|---------------|--------------------------|
| INJURY, FACE, NOS                                         | 2                                       | 18.7619    | 102                                        | 46.6734       | 0.402(0.099-1.6319)      |
| INJURY, FACE, SUPERFICIAL, INFECTED                       | 0                                       | 0          | 7                                          | 2.5162        | 0(0-Inf)                 |
| INJURY, FACE, SUPERFICIAL, NOS                            | 16                                      | 116.7649   | 234                                        | 67.7141       | 1.7244(1.0366-2.8685)    |
| INJURY, FEMORAL ARTERY, COMMON                            | 0                                       | 0          | 5                                          | 1.9395        | 0(0-Inf)                 |
| INJURY, FEMORAL ARTERY, SUPERFICIAL                       | 0                                       | 0          | 1                                          | 0.4048        | 0(0-Inf)                 |
| INJURY, FINGER, CRUSH, LATE EFFECT                        | 1                                       | 10.1793    | 9                                          | 2.4889        | 4.0899(0.5104-32.7729)   |
| INJURY, FINGER, CRUSH, NOS                                | 3                                       | 23.2676    | 127                                        | 31.9134       | 0.7291(0.2316-2.2955)    |
| INJURY, FINGER, JOINT, NOS                                | 0                                       | 0          | 24                                         | 5.8815        | 0(0-Inf)                 |
| INJURY, FINGER, MUSCULOSKELETAL, LATE EFFECT              | 1                                       | 9.5071     | 10                                         | 2.8287        | 3.3609(0.425-26.5784)    |
| INJURY, FINGER, MUSCULOSKELETAL, NOS                      | 3                                       | 21.9507    | 50                                         | 12.4382       | 1.7648(0.5478-5.6853)    |
| INJURY, FINGER, NOS                                       | 7                                       | 48.8964    | 228                                        | 57.5674       | 0.8494(0.3996-1.8052)    |
| INJURY, FINGER, SUPERFICIAL, INFECTED                     | 0                                       | 0          | 11                                         | 2.95          | 0(0-Inf)                 |
| INJURY, FINGER, SUPERFICIAL, NOS                          | 2                                       | 14.4591    | 97                                         | 23.5558       | 0.6138(0.151-2.4953)     |
| INJURY, FINGERNAIL, NOS                                   | 1                                       | 7.0407     | 1                                          | 0.265         | 26.5706(1.5996-441.3668) |
| INJURY, FLANK, NOS                                        | 1                                       | 6.945      | 7                                          | 1.7683        | 3.9275(0.4746-32.4978)   |
| INJURY, FLANK, SUPERFICIAL, INFECTED                      | 0                                       | 0          | 1                                          | 0.4751        | 0(0-Inf)                 |
| INJURY, FLANK, SUPERFICIAL, NOS                           | 0                                       | 0          | 11                                         | 2.7218        | 0(0-Inf)                 |
| INJURY, FLEXION, CODE ALSO INJURY MUSCULOSKELETAL BY SITE | 2                                       | 14.2943    | 23                                         | 5.6551        | 2.5277(0.591-10.8116)    |
| INJURY, FOOT, CRUSH, LATE EFFECT                          | 0                                       | 0          | 1                                          | 0.3526        | 0(0-Inf)                 |
| INJURY, FOOT, CRUSH, NOS                                  | 0                                       | 0          | 10                                         | 3.6017        | 0(0-Inf)                 |
| INJURY, FOOT, JOINT, NOS                                  | 0                                       | 0          | 1                                          | 0.4048        | 0(0-Inf)                 |
| INJURY, FOOT, MUSCULOSKELETAL, LATE EFFECT                | 0                                       | 0          | 1                                          | 0.2354        | 0(0-Inf)                 |
| INJURY, FOOT, MUSCULOSKELETAL, NOS                        | 0                                       | 0          | 12                                         | 3.0816        | 0(0-Inf)                 |
| INJURY, FOOT, NOS                                         | 4                                       | 27.7748    | 176                                        | 43.5464       | 0.6378(0.2363-1.7217)    |
| INJURY, FOOT, SUPERFICIAL, INFECTED                       | 0                                       | 0          | 6                                          | 1.9403        | 0(0-Inf)                 |
| INJURY, FOOT, SUPERFICIAL, LATE EFFECT                    | 0                                       | 0          | 5                                          | 1.1871        | 0(0-Inf)                 |
| INJURY, FOOT, SUPERFICIAL, NOS                            | 3                                       | 23.1826    | 87                                         | 28.7878       | 0.8053(0.254-2.553)      |
| INJURY, FOREARM, CRUSH, LATE EFFECT                       | 0                                       | 0          | 1                                          | 0.2729        | 0(0-Inf)                 |
| INJURY, FOREARM, CRUSH, NOS                               | 0                                       | 0          | 2                                          | 0.4854        | 0(0-Inf)                 |
| INJURY, FOREARM, MUSCULOSKELETAL, NOS                     | 0                                       | 0          | 2                                          | 1.7097        | 0(0-Inf)                 |
| INJURY, FOREARM, NOS                                      | 2                                       | 13.8841    | 20                                         | 4.9446        | 2.8079(0.6489-12.1505)   |
| INJURY, FOREARM, SUPERFICIAL, INFECTED                    | 1                                       | 7.8023     | 7                                          | 1.7012        | 4.5864(0.5533-38.0166)   |
| INJURY, FOREARM, SUPERFICIAL, NOS                         | 8                                       | 58.6734    | 86                                         | 25.4066       | 2.3094(1.114-4.7874)     |
| INJURY, GASTROINTESTINAL TRACT, NEC                       | 1                                       | 7.1988     | 30                                         | 8.6961        | 0.8278(0.1123-6.0999)    |
| INJURY, GENITALIA, EXTERNAL, NOS                          | 0                                       | 0          | 5                                          | 1.4862        | 0(0-Inf)                 |
| INJURY, GROIN, NOS                                        | 0                                       | 0          | 7                                          | 1.7941        | 0(0-Inf)                 |
| INJURY, GROIN, SUPERFICIAL, LATE EFFECT                   | 0                                       | 0          | 1                                          | 0.3526        | 0(0-Inf)                 |
| INJURY, GROIN, SUPERFICIAL, NOS                           | 0                                       | 0          | 5                                          | 2.0028        | 0(0-Inf)                 |
| INJURY, GUM, SUPERFICIAL, INFECTED                        | 0                                       | 0          | 1                                          | 0.3526        | 0(0-Inf)                 |



| Description                                               | No. of Positive Cases with Disease Code | Case Rate* | No. of Positive Controls with Disease Code | Control Rate* | Relative Risk (95%CI)    |
|-----------------------------------------------------------|-----------------------------------------|------------|--------------------------------------------|---------------|--------------------------|
| INJURY, GUM, SUPERFICIAL, NOS                             | 2                                       | 15.8554    | 29                                         | 6.809         | 2.3286(0.5512-9.8373)    |
| INJURY, HAND, CRUSH, LATE EFFECT                          | 0                                       | 0          | 4                                          | 1.3086        | 0(0-Inf)                 |
| INJURY, HAND, CRUSH, NOS                                  | 1                                       | 6.9208     | 16                                         | 4.1956        | 1.6495(0.2169-12.5442)   |
| INJURY, HAND, MUSCULOSKELETAL, LATE EFFECT                | 1                                       | 9.9318     | 2                                          | 0.5185        | 19.1563(1.6599-221.081)  |
| INJURY, HAND, MUSCULOSKELETAL, NOS                        | 1                                       | 7.7346     | 17                                         | 4.4446        | 1.7402(0.23-13.1694)     |
| INJURY, HAND, NOS                                         | 7                                       | 48.8841    | 150                                        | 38.8617       | 1.2579(0.5879-2.6915)    |
| INJURY, HAND, SUPERFICIAL, INFECTED                       | 1                                       | 6.9425     | 8                                          | 2.0056        | 3.4615(0.4257-28.1439)   |
| INJURY, HAND, SUPERFICIAL, LATE EFFECT                    | 0                                       | 0          | 2                                          | 0.4854        | 0(0-Inf)                 |
| INJURY, HAND, SUPERFICIAL, NOS                            | 5                                       | 35.2665    | 130                                        | 35.3688       | 0.9971(0.4071-2.4424)    |
| INJURY, HEAD (EXTERNAL), NOS                              | 3                                       | 38.6576    | 92                                         | 66.6967       | 0.5796(0.1832-1.8334)    |
| INJURY, HEAD, ARTERY, NEC                                 | 0                                       | 0          | 2                                          | 0.7055        | 0(0-Inf)                 |
| INJURY, HEAD, NEC, (INTRACRANIAL), LATE EFFECT            | 3                                       | 25.1948    | 93                                         | 35.6862       | 0.706(0.2231-2.2341)     |
| INJURY, HEAD, NEC, (INTRACRANIAL)--CHI                    | 26                                      | 204.588    | 700                                        | 235.1709      | 0.87(0.5876-1.2881)      |
| INJURY, HEAD, SUPERFICIAL                                 | 2                                       | 21.8891    | 37                                         | 21.2742       | 1.0289(0.247-4.2863)     |
| INJURY, HEART, NEC                                        | 0                                       | 0          | 17                                         | 4.5988        | 0(0-Inf)                 |
| INJURY, HEEL, SUPERFICIAL, INFECTED                       | 0                                       | 0          | 1                                          | 0.4751        | 0(0-Inf)                 |
| INJURY, HEEL, SUPERFICIAL, NOS                            | 1                                       | 9.5266     | 43                                         | 20.0192       | 0.4759(0.0653-3.4654)    |
| INJURY, HIP, MUSCULOSKELETAL, LATE EFFECT                 | 0                                       | 0          | 1                                          | 0.2354        | 0(0-Inf)                 |
| INJURY, HIP, MUSCULOSKELETAL, NOS                         | 0                                       | 0          | 5                                          | 1.7716        | 0(0-Inf)                 |
| INJURY, HIP, NOS                                          | 1                                       | 10.0428    | 60                                         | 30.5316       | 0.3289(0.0455-2.3783)    |
| INJURY, HIP, SUPERFICIAL, INFECTED                        | 0                                       | 0          | 1                                          | 0.234         | 0(0-Inf)                 |
| INJURY, HIP, SUPERFICIAL, NOS                             | 2                                       | 16.7726    | 14                                         | 5.3313        | 3.146(0.7067-14.0057)    |
| INJURY, ILIAC ARTERY                                      | 0                                       | 0          | 2                                          | 0.5069        | 0(0-Inf)                 |
| INJURY, INTERNAL, NEC                                     | 1                                       | 7.5646     | 6                                          | 1.9594        | 3.8606(0.4567-32.6316)   |
| INJURY, INTERVERTEBRAL, JOINT, LUMBOSACRAL, NOS           | 0                                       | 0          | 1                                          | 0.398         | 0(0-Inf)                 |
| INJURY, INTERVERTEBRAL, JOINT, NOS                        | 0                                       | 0          | 1                                          | 6.4845        | 0(0-Inf)                 |
| INJURY, INTERVERTEBRAL, JOINT, THORACIC, NOS              | 0                                       | 0          | 1                                          | 0.2354        | 0(0-Inf)                 |
| INJURY, INTRA-ABDOMINAL ORGAN, NEC                        | 0                                       | 0          | 5                                          | 2.1779        | 0(0-Inf)                 |
| INJURY, INTRACRANIAL, LATE EFFECT                         | 0                                       | 0          | 3                                          | 0.871         | 0(0-Inf)                 |
| INJURY, INTRACRANIAL, NOS                                 | 0                                       | 0          | 1                                          | 0.8878        | 0(0-Inf)                 |
| INJURY, INTRATHORACIC ORGAN, NEC                          | 1                                       | 8.0411     | 3                                          | 0.7345        | 10.9475(1.0982-109.1349) |
| INJURY, INTRATHORACIC ORGAN, NEC, LATE EFFECT             | 0                                       | 0          | 1                                          | 0.234         | 0(0-Inf)                 |
| INJURY, INVERSION, CODE ALSO SPRAIN BY SITE               | 0                                       | 0          | 26                                         | 7.2564        | 0(0-Inf)                 |
| INJURY, JAMMING, CODE ALSO INJURY MUSCULOSKELETAL BY SITE | 0                                       | 0          | 1                                          | 0.3526        | 0(0-Inf)                 |
| INJURY, JAW, JOINT, NOS                                   | 0                                       | 0          | 1                                          | 0.8883        | 0(0-Inf)                 |
| INJURY, JAW, MUSCULOSKELETAL, LATE EFFECT                 | 0                                       | 0          | 1                                          | 0.2729        | 0(0-Inf)                 |
| INJURY, JAW, MUSCULOSKELETAL, NOS                         | 0                                       | 0          | 5                                          | 1.3718        | 0(0-Inf)                 |
| INJURY, JOINT, NOS                                        | 0                                       | 0          | 4                                          | 0.9751        | 0(0-Inf)                 |
| INJURY, KIDNEY, NEC                                       | 0                                       | 0          | 12                                         | 3.0162        | 0(0-Inf)                 |

| Description                                                 | No. of Positive Cases with Disease Code | Case Rate* | No. of Positive Controls with Disease Code | Control Rate* | Relative Risk (95%CI)   |
|-------------------------------------------------------------|-----------------------------------------|------------|--------------------------------------------|---------------|-------------------------|
| INJURY, KNEE, CRUSH, NOS                                    | 0                                       | 0          | 1                                          | 0.2354        | 0(0-Inf)                |
| INJURY, KNEE, JOINT, NOS                                    | 0                                       | 0          | 24                                         | 5.8258        | 0(0-Inf)                |
| INJURY, KNEE, MUSCULOSKELETAL, LATE EFFECT                  | 0                                       | 0          | 18                                         | 4.2394        | 0(0-Inf)                |
| INJURY, KNEE, MUSCULOSKELETAL, NOS                          | 2                                       | 13.861     | 74                                         | 18.726        | 0.7402(0.1812-3.0243)   |
| INJURY, KNEE, NOS                                           | 13                                      | 92.0786    | 279                                        | 75.7691       | 1.2153(0.6955-2.1235)   |
| INJURY, KNEE, SUPERFICIAL, NOS                              | 3                                       | 28.4481    | 110                                        | 51.0065       | 0.5577(0.1768-1.7595)   |
| INJURY, LABIA, SUPERFICIAL, NOS                             | 1                                       | 13.8284    | 10                                         | 4.7673        | 2.9006(0.365-23.0534)   |
| INJURY, LATE EFFECT, NOS--INJL                              | 52                                      | 382.8239   | 1315                                       | 372.2414      | 1.0284(0.7789-1.358)    |
| INJURY, LEG, CRUSH, LATE EFFECT                             | 0                                       | 0          | 2                                          | 0.5457        | 0(0-Inf)                |
| INJURY, LEG, CRUSH, NOS                                     | 0                                       | 0          | 2                                          | 0.432         | 0(0-Inf)                |
| INJURY, LEG, LOWER, MUSCULOSKELETAL, NOS                    | 0                                       | 0          | 16                                         | 4.6615        | 0(0-Inf)                |
| INJURY, LEG, MUSCULOSKELETAL, LATE EFFECT                   | 0                                       | 0          | 2                                          | 0.5475        | 0(0-Inf)                |
| INJURY, LEG, MUSCULOSKELETAL, NOS                           | 1                                       | 7.023      | 16                                         | 4.4023        | 1.5953(0.2098-12.1331)  |
| INJURY, LEG, NOS                                            | 3                                       | 23.1989    | 137                                        | 45.3931       | 0.5111(0.1625-1.6071)   |
| INJURY, LEG, SUPERFICIAL, INFECTED                          | 2                                       | 13.9186    | 36                                         | 9.4512        | 1.4727(0.3526-6.1506)   |
| INJURY, LEG, SUPERFICIAL, LATE EFFECT                       | 0                                       | 0          | 5                                          | 1.2019        | 0(0-Inf)                |
| INJURY, LEG, SUPERFICIAL, NOS                               | 19                                      | 137.8433   | 309                                        | 87.4494       | 1.5763(0.9898-2.5103)   |
| INJURY, LIGAMENT, CODE ALSO INJURY, MUSCULOSKELETAL BY SITE | 2                                       | 15.8224    | 86                                         | 21.1216       | 0.7491(0.1839-3.0519)   |
| INJURY, LIP, SUPERFICIAL, INFECTED                          | 0                                       | 0          | 1                                          | 0.4048        | 0(0-Inf)                |
| INJURY, LIP, SUPERFICIAL, LATE EFFECT                       | 0                                       | 0          | 1                                          | 0.4048        | 0(0-Inf)                |
| INJURY, LIP, SUPERFICIAL, NOS                               | 1                                       | 7.6763     | 22                                         | 7.1929        | 1.0672(0.1429-7.969)    |
| INJURY, LIVER, NEC                                          | 0                                       | 0          | 4                                          | 0.9521        | 0(0-Inf)                |
| INJURY, LUNG, LATE EFFECT                                   | 0                                       | 0          | 2                                          | 0.5709        | 0(0-Inf)                |
| INJURY, LUNG, NEC                                           | 1                                       | 9.4788     | 2                                          | 0.9261        | 10.235(0.8939-117.1827) |
| INJURY, MESENTERIC VEIN                                     | 0                                       | 0          | 1                                          | 0.2354        | 0(0-Inf)                |
| INJURY, METATARSOPHALANGEAL, JOINT, NOS                     | 3                                       | 23.3424    | 6                                          | 1.3974        | 16.7045(4.0611-68.7109) |
| INJURY, MIDTARSAL, JOINT, NOS                               | 0                                       | 0          | 1                                          | 0.2729        | 0(0-Inf)                |
| INJURY, MOUTH, NOS                                          | 3                                       | 21.7787    | 39                                         | 11.4662       | 1.8994(0.5834-6.1838)   |
| INJURY, MULTIPLE SITES, NEC                                 | 0                                       | 0          | 14                                         | 3.9972        | 0(0-Inf)                |
| INJURY, MULTIPLE SITES, NOS                                 | 2                                       | 14.0699    | 46                                         | 11.001        | 1.279(0.3089-5.2954)    |
| INJURY, MUSCLE, CODE ALSO INJURY, MUSCULOSKELETAL BY SITE   | 0                                       | 0          | 32                                         | 8.0525        | 0(0-Inf)                |
| INJURY, NAIL, FINGER                                        | 2                                       | 14.3042    | 106                                        | 26.7369       | 0.535(0.1318-2.1713)    |
| INJURY, NAIL, FINGER, LATE EFFECT                           | 0                                       | 0          | 3                                          | 0.7175        | 0(0-Inf)                |
| INJURY, NAIL, TOE                                           | 2                                       | 15.1078    | 59                                         | 18.8013       | 0.8036(0.1957-3.2999)   |
| INJURY, NAIL, TOE, LATE EFFECT                              | 0                                       | 0          | 9                                          | 3.2423        | 0(0-Inf)                |
| INJURY, NECK, JOINT, NOS                                    | 1                                       | 7.5913     | 8                                          | 1.907         | 3.9808(0.4889-32.4102)  |
| INJURY, NECK, MUSCULOSKELETAL, LATE EFFECT                  | 0                                       | 0          | 10                                         | 2.4314        | 0(0-Inf)                |
| INJURY, NECK, MUSCULOSKELETAL, NOS                          | 2                                       | 14.9731    | 9                                          | 2.0219        | 7.4055(1.5638-35.0681)  |

| Description                                                             | No. of Positive Cases with Disease Code | Case Rate* | No. of Positive Controls with Disease Code | Control Rate* | Relative Risk (95%CI)    |
|-------------------------------------------------------------------------|-----------------------------------------|------------|--------------------------------------------|---------------|--------------------------|
| INJURY, NECK, NOS                                                       | 0                                       | 0          | 17                                         | 6.0603        | 0(0-Inf)                 |
| INJURY, NECK, SUPERFICIAL, INFECTED                                     | 0                                       | 0          | 2                                          | 0.5709        | 0(0-Inf)                 |
| INJURY, NECK, SUPERFICIAL, NOS                                          | 0                                       | 0          | 19                                         | 5.3051        | 0(0-Inf)                 |
| INJURY, NERVE, ACOUSTIC                                                 | 1                                       | 6.8992     | 0                                          | 0             | 12248320692.853(0-Inf)   |
| INJURY, NERVE, ARM, NOS, LATE EFFECT                                    | 0                                       | 0          | 1                                          | 0.234         | 0(0-Inf)                 |
| INJURY, NERVE, ARM, NOS/NEC                                             | 0                                       | 0          | 2                                          | 0.7896        | 0(0-Inf)                 |
| INJURY, NERVE, ARM, UPPER LATE EFFECT                                   | 0                                       | 0          | 1                                          | 0.398         | 0(0-Inf)                 |
| INJURY, NERVE, ARM, UPPER, NEC                                          | 0                                       | 0          | 2                                          | 1.7764        | 0(0-Inf)                 |
| INJURY, NERVE, AUDITORY                                                 | 1                                       | 6.8819     | 0                                          | 0             | 12227628204.358(0-Inf)   |
| INJURY, NERVE, CERVICAL (SYMPATHETIC), LATE EFFECT                      | 0                                       | 0          | 1                                          | 0.8878        | 0(0-Inf)                 |
| INJURY, NERVE, CRANIAL, FIFTH                                           | 0                                       | 0          | 1                                          | 0.4751        | 0(0-Inf)                 |
| INJURY, NERVE, CRANIAL, FOURTH                                          | 0                                       | 0          | 1                                          | 0.4751        | 0(0-Inf)                 |
| INJURY, NERVE, CRANIAL, NEC, LATE EFFECT                                | 0                                       | 0          | 3                                          | 0.7885        | 0(0-Inf)                 |
| INJURY, NERVE, CRANIAL, SEVENTH                                         | 0                                       | 0          | 1                                          | 0.3526        | 0(0-Inf)                 |
| INJURY, NERVE, CRANIAL, TWELFTH                                         | 0                                       | 0          | 1                                          | 0.8877        | 0(0-Inf)                 |
| INJURY, NERVE, DIGITAL, IN FOOT (SEE ALSO NERVE SPECIFIED)              | 0                                       | 0          | 1                                          | 0.398         | 0(0-Inf)                 |
| INJURY, NERVE, DIGITAL, IN HAND (SEE ALSO NERVE SPECIFIED)              | 0                                       | 0          | 37                                         | 9.1319        | 0(0-Inf)                 |
| INJURY, NERVE, DIGITAL, IN HAND, LATE EFFECT (SEE ALSO NERVE SPECIFIED) | 0                                       | 0          | 3                                          | 1.3472        | 0(0-Inf)                 |
| INJURY, NERVE, FACIAL                                                   | 0                                       | 0          | 2                                          | 0.4854        | 0(0-Inf)                 |
| INJURY, NERVE, FEMORAL                                                  | 0                                       | 0          | 1                                          | 0.2354        | 0(0-Inf)                 |
| INJURY, NERVE, FOOT                                                     | 0                                       | 0          | 3                                          | 0.7065        | 0(0-Inf)                 |
| INJURY, NERVE, FOOT, LATE EFFECT                                        | 0                                       | 0          | 1                                          | 0.4751        | 0(0-Inf)                 |
| INJURY, NERVE, HAND                                                     | 0                                       | 0          | 2                                          | 0.4709        | 0(0-Inf)                 |
| INJURY, NERVE, LEG, LOWER                                               | 0                                       | 0          | 3                                          | 0.7022        | 0(0-Inf)                 |
| INJURY, NERVE, LEG, NOS/NEC                                             | 0                                       | 0          | 2                                          | 0.5069        | 0(0-Inf)                 |
| INJURY, NERVE, LUMBAR PLEXUS                                            | 0                                       | 0          | 1                                          | 0.4751        | 0(0-Inf)                 |
| INJURY, NERVE, LUMBAR PLEXUS, LATE EFFECT                               | 0                                       | 0          | 2                                          | 0.7054        | 0(0-Inf)                 |
| INJURY, NERVE, LUMBOSACRAL PLEXUS                                       | 0                                       | 0          | 1                                          | 0.234         | 0(0-Inf)                 |
| INJURY, NERVE, LUMBOSACRAL PLEXUS, LATE EFFECT                          | 0                                       | 0          | 1                                          | 0.2729        | 0(0-Inf)                 |
| INJURY, NERVE, MEDIAL, WRIST OR HAND                                    | 0                                       | 0          | 4                                          | 1.8408        | 0(0-Inf)                 |
| INJURY, NERVE, MEDIAL, WRIST OR HAND, LATE EFFECT                       | 0                                       | 0          | 1                                          | 0.2354        | 0(0-Inf)                 |
| INJURY, NERVE, MEDIAN, FOREARM                                          | 0                                       | 0          | 1                                          | 2.4856        | 0(0-Inf)                 |
| INJURY, NERVE, MEDIAN, NOS                                              | 0                                       | 0          | 3                                          | 1.073         | 0(0-Inf)                 |
| INJURY, NERVE, NEC                                                      | 0                                       | 0          | 7                                          | 1.9425        | 0(0-Inf)                 |
| INJURY, NERVE, NEC, LATE EFFECT                                         | 1                                       | 9.9298     | 1                                          | 0.4943        | 20.0874(1.2009-336.0124) |
| INJURY, NERVE, NOS                                                      | 0                                       | 0          | 3                                          | 1.5108        | 0(0-Inf)                 |
| INJURY, NERVE, NOS, LATE EFFECT                                         | 0                                       | 0          | 1                                          | 0.3526        | 0(0-Inf)                 |
| INJURY, NERVE, OPTIC                                                    | 0                                       | 0          | 2                                          | 0.7898        | 0(0-Inf)                 |
| INJURY, NERVE, PERONEAL, NOS                                            | 1                                       | 7.0067     | 3                                          | 0.8044        | 8.711(0.875-86.7202)     |

| Description                                       | No. of Positive Cases with Disease Code | Case Rate* | No. of Positive Controls with Disease Code | Control Rate* | Relative Risk (95%CI)   |
|---------------------------------------------------|-----------------------------------------|------------|--------------------------------------------|---------------|-------------------------|
| INJURY, NERVE, RADIAL, NOS                        | 0                                       | 0          | 10                                         | 2.5177        | 0(0-Inf)                |
| INJURY, NERVE, RADIAL, NOS, LATE EFFECT           | 0                                       | 0          | 1                                          | 0.8877        | 0(0-Inf)                |
| INJURY, NERVE, RADIAL, UPPER ARM                  | 0                                       | 0          | 3                                          | 0.8187        | 0(0-Inf)                |
| INJURY, NERVE, RADIAL, WRIST OR HAND              | 2                                       | 13.9058    | 27                                         | 6.9422        | 2.0031(0.4732-8.4785)   |
| INJURY, NERVE, RADIAL, WRIST OR HAND, LATE EFFECT | 0                                       | 0          | 5                                          | 1.5588        | 0(0-Inf)                |
| INJURY, NERVE, SCIATIC                            | 0                                       | 0          | 3                                          | 2.0495        | 0(0-Inf)                |
| INJURY, NERVE, SCIATIC, LATE EFFECT               | 0                                       | 0          | 3                                          | 0.746         | 0(0-Inf)                |
| INJURY, NERVE, SPINAL, NEC                        | 0                                       | 0          | 1                                          | 0.2729        | 0(0-Inf)                |
| INJURY, NERVE, TENTH CRANIAL                      | 0                                       | 0          | 1                                          | 0.8877        | 0(0-Inf)                |
| INJURY, NERVE, THIGH                              | 1                                       | 7.2145     | 0                                          | 0             | 12749696373.9124(0-Inf) |
| INJURY, NERVE, TIBIAL                             | 0                                       | 0          | 1                                          | 1.0363        | 0(0-Inf)                |
| INJURY, NERVE, TIBIAL, LATE EFFECT                | 0                                       | 0          | 1                                          | 0.234         | 0(0-Inf)                |
| INJURY, NERVE, TRIGEMINAL                         | 0                                       | 0          | 1                                          | 0.4751        | 0(0-Inf)                |
| INJURY, NERVE, TROCHLEAR                          | 0                                       | 0          | 1                                          | 0.4751        | 0(0-Inf)                |
| INJURY, NERVE, ULNAR, FOREARM                     | 0                                       | 0          | 1                                          | 0.2729        | 0(0-Inf)                |
| INJURY, NERVE, ULNAR, NOS                         | 0                                       | 0          | 15                                         | 3.7349        | 0(0-Inf)                |
| INJURY, NERVE, ULNAR, NOS LATE EFFECT             | 0                                       | 0          | 2                                          | 0.5709        | 0(0-Inf)                |
| INJURY, NERVE, ULNAR, WRIST OR HAND               | 1                                       | 8.6931     | 31                                         | 8.2753        | 1.0505(0.1428-7.73)     |
| INJURY, NERVE, ULNAR, WRIST OR HAND, LATE EFFECT  | 0                                       | 0          | 6                                          | 1.893         | 0(0-Inf)                |
| INJURY, NERVE, WRIST                              | 0                                       | 0          | 1                                          | 0.8278        | 0(0-Inf)                |
| INJURY, NOS                                       | 3                                       | 24.9567    | 127                                        | 47.5483       | 0.5249(0.1667-1.6524)   |
| INJURY, NOS, CRUSH                                | 0                                       | 0          | 3                                          | 0.6986        | 0(0-Inf)                |
| INJURY, NOS, MUSCULOSKELETAL                      | 0                                       | 0          | 17                                         | 4.797         | 0(0-Inf)                |
| INJURY, NOS, MUSCULOSKELETAL, LATE EFFECT         | 0                                       | 0          | 2                                          | 1.1972        | 0(0-Inf)                |
| INJURY, NOS, SUPERFICIAL                          | 2                                       | 14.3549    | 180                                        | 51.2372       | 0.2802(0.0694-1.1303)   |
| INJURY, NOS, SUPERFICIAL, INFECTED                | 6                                       | 42.3884    | 84                                         | 20.0856       | 2.1104(0.9176-4.8539)   |
| INJURY, NOS, SUPERFICIAL, LATE EFFECT             | 0                                       | 0          | 1                                          | 0.2354        | 0(0-Inf)                |
| INJURY, NOS, WAR CAUSED                           | 0                                       | 0          | 1                                          | 0.234         | 0(0-Inf)                |
| INJURY, NOSE, NOS                                 | 0                                       | 0          | 23                                         | 6.6216        | 0(0-Inf)                |
| INJURY, NOSE, SUPERFICIAL, INFECTED               | 0                                       | 0          | 2                                          | 0.5475        | 0(0-Inf)                |
| INJURY, NOSE, SUPERFICIAL, LATE EFFECT            | 0                                       | 0          | 1                                          | 0.234         | 0(0-Inf)                |
| INJURY, NOSE, SUPERFICIAL, NOS                    | 6                                       | 42.6419    | 61                                         | 16.497        | 2.5848(1.1109-6.0143)   |
| INJURY, ON THE JOB (OTJI)                         | 5                                       | 47.7709    | 156                                        | 38.7529       | 1.2327(0.5047-3.0106)   |
| INJURY, ORBIT, LATE EFFECT                        | 0                                       | 0          | 1                                          | 0.2729        | 0(0-Inf)                |
| INJURY, ORBIT, NOS                                | 4                                       | 28.24      | 31                                         | 8.3814        | 3.3694(1.1787-9.6313)   |
| INJURY, PELVIC ORGAN, NEC                         | 0                                       | 0          | 10                                         | 2.6025        | 0(0-Inf)                |
| INJURY, PELVIC ORGAN, NEC, LATE EFFECT            | 0                                       | 0          | 1                                          | 0.2729        | 0(0-Inf)                |
| INJURY, PELVIS, MUSCULOSKELETAL, LATE EFFECT      | 0                                       | 0          | 2                                          | 0.5709        | 0(0-Inf)                |
| INJURY, PELVIS, MUSCULOSKELETAL, NOS              | 0                                       | 0          | 6                                          | 3.0225        | 0(0-Inf)                |
| INJURY, PENIS, SUPERFICIAL, NOS                   | 0                                       | 0          | 8                                          | 2.2837        | 0(0-Inf)                |

| Description                                          | No. of Positive Cases with Disease Code | Case Rate* | No. of Positive Controls with Disease Code | Control Rate* | Relative Risk (95%CI)    |
|------------------------------------------------------|-----------------------------------------|------------|--------------------------------------------|---------------|--------------------------|
| INJURY, PERINEUM, NOS                                | 0                                       | 0          | 3                                          | 0.8116        | 0(0-Inf)                 |
| INJURY, PERINEUM, SUPERFICIAL, NOS                   | 0                                       | 0          | 6                                          | 1.5042        | 0(0-Inf)                 |
| INJURY, PERIORBITAL                                  | 0                                       | 0          | 16                                         | 11.3517       | 0(0-Inf)                 |
| INJURY, PHARYNX, NOS                                 | 1                                       | 14.029     | 1                                          | 0.8074        | 17.3754(1.0514-287.1488) |
| INJURY, POPLITEAL ARTERY                             | 0                                       | 0          | 2                                          | 0.5908        | 0(0-Inf)                 |
| INJURY, PULMONARY ARTERY                             | 0                                       | 0          | 1                                          | 0.854         | 0(0-Inf)                 |
| INJURY, RADIAL ARTERY                                | 0                                       | 0          | 6                                          | 1.6567        | 0(0-Inf)                 |
| INJURY, RADIAL VEIN                                  | 0                                       | 0          | 2                                          | 0.5476        | 0(0-Inf)                 |
| INJURY, RADIOCARPAL, JOINT, NOS                      | 0                                       | 0          | 1                                          | 0.3527        | 0(0-Inf)                 |
| INJURY, RENAL ARTERY                                 | 0                                       | 0          | 1                                          | 0.234         | 0(0-Inf)                 |
| INJURY, RETROPERITONEAL, NEC                         | 0                                       | 0          | 1                                          | 0.8878        | 0(0-Inf)                 |
| INJURY, RIB, NOS                                     | 1                                       | 7.9548     | 26                                         | 9.0293        | 0.881(0.1189-6.5278)     |
| INJURY, ROTATION, CODE ALSO INJURY BY SITE           | 0                                       | 0          | 8                                          | 2.4464        | 0(0-Inf)                 |
| INJURY, ROTATOR CUFF                                 | 8                                       | 69.9047    | 186                                        | 75.8185       | 0.922(0.4535-1.8744)     |
| INJURY, SACRAL PLEXUS                                | 0                                       | 0          | 1                                          | 0.3526        | 0(0-Inf)                 |
| INJURY, SCALP, NOS                                   | 1                                       | 10.8679    | 12                                         | 6.7826        | 1.6023(0.2066-12.4248)   |
| INJURY, SCALP, SUPERFICIAL, INFECTED                 | 0                                       | 0          | 2                                          | 0.432         | 0(0-Inf)                 |
| INJURY, SCALP, SUPERFICIAL, NOS                      | 4                                       | 30.5306    | 67                                         | 21.7349       | 1.4047(0.5102-3.8674)    |
| INJURY, SCAPULAR REGION, NOS                         | 1                                       | 6.9402     | 2                                          | 0.4959        | 13.9951(1.2077-162.1753) |
| INJURY, SCROTUM, SUPERFICIAL, NOS                    | 1                                       | 10.6474    | 4                                          | 2.2149        | 4.8072(0.5291-43.678)    |
| INJURY, SEAT BELT/AIR BAG CAUSED, CODE ALSO BY SITE  | 0                                       | 0          | 6                                          | 2.1462        | 0(0-Inf)                 |
| INJURY, SELF-INFLICTED                               | 0                                       | 0          | 8                                          | 3.2138        | 0(0-Inf)                 |
| INJURY, SHOULDER, JOINT, NOS                         | 0                                       | 0          | 5                                          | 1.1873        | 0(0-Inf)                 |
| INJURY, SHOULDER, MUSCULOSKELETAL, LATE EFFECT       | 0                                       | 0          | 8                                          | 3.6834        | 0(0-Inf)                 |
| INJURY, SHOULDER, MUSCULOSKELETAL, NOS               | 0                                       | 0          | 33                                         | 8.1734        | 0(0-Inf)                 |
| INJURY, SHOULDER, NOS                                | 10                                      | 79.4722    | 174                                        | 60.9405       | 1.3041(0.6879-2.4723)    |
| INJURY, SHOULDER, SUPERFICIAL, LATE EFFECT           | 0                                       | 0          | 2                                          | 0.5458        | 0(0-Inf)                 |
| INJURY, SHOULDER, SUPERFICIAL, NOS                   | 1                                       | 7.1761     | 21                                         | 5.9795        | 1.2001(0.1603-8.9865)    |
| INJURY, SPINAL CORD, CERVICAL                        | 1                                       | 6.9383     | 14                                         | 3.6518        | 1.9(0.2473-14.5974)      |
| INJURY, SPINAL CORD, LATE EFFECT                     | 1                                       | 7.8841     | 13                                         | 4.5629        | 1.7279(0.2241-13.3239)   |
| INJURY, SPINAL CORD, LUMBAR                          | 1                                       | 7.1211     | 1                                          | 0.2189        | 32.5279(1.8941-558.6111) |
| INJURY, SPINAL CORD, NOS                             | 0                                       | 0          | 9                                          | 3.4446        | 0(0-Inf)                 |
| INJURY, SPINAL CORD, THORACIC                        | 0                                       | 0          | 4                                          | 2.754         | 0(0-Inf)                 |
| INJURY, SPLEEN, LATE EFFECT                          | 0                                       | 0          | 1                                          | 0.2354        | 0(0-Inf)                 |
| INJURY, SPLEEN, NEC                                  | 0                                       | 0          | 20                                         | 6.0691        | 0(0-Inf)                 |
| INJURY, SPLEEN, WITH OPEN INTRA-ABDOMINAL WOUND, NOS | 0                                       | 0          | 1                                          | 1.0363        | 0(0-Inf)                 |
| INJURY, STERNOCLAVICULAR, JOINT, NOS                 | 0                                       | 0          | 2                                          | 0.432         | 0(0-Inf)                 |
| INJURY, SUBCLAVIAN ARTERY                            | 0                                       | 0          | 1                                          | 0.2354        | 0(0-Inf)                 |
| INJURY, TARSOMETATARSAL, JOINT, NOS                  | 0                                       | 0          | 1                                          | 0.8528        | 0(0-Inf)                 |
| INJURY, TEMPOROMANDIBULAR, JOINT, NOS                | 0                                       | 0          | 2                                          | 0.8096        | 0(0-Inf)                 |

| Description                                                 | No. of Positive Cases with Disease Code | Case Rate* | No. of Positive Controls with Disease Code | Control Rate* | Relative Risk (95%CI)  |
|-------------------------------------------------------------|-----------------------------------------|------------|--------------------------------------------|---------------|------------------------|
| INJURY, TENDON, CODE ALSO INJURY, MUSCULOSKELETAL BY SITE   | 0                                       | 0          | 45                                         | 11.2907       | 0(0-Inf)               |
| INJURY, TESTIS, SUPERFICIAL, NOS                            | 1                                       | 11.7682    | 3                                          | 1.8965        | 6.2053(0.6342-60.7184) |
| INJURY, THIGH, MUSCULOSKELETAL, LATE EFFECT                 | 0                                       | 0          | 1                                          | 0.2729        | 0(0-Inf)               |
| INJURY, THIGH, MUSCULOSKELETAL, NOS                         | 0                                       | 0          | 13                                         | 3.1219        | 0(0-Inf)               |
| INJURY, THIGH, NOS                                          | 0                                       | 0          | 11                                         | 2.8446        | 0(0-Inf)               |
| INJURY, THIGH, SUPERFICIAL, INFECTED                        | 0                                       | 0          | 3                                          | 0.6536        | 0(0-Inf)               |
| INJURY, THIGH, SUPERFICIAL, NOS                             | 1                                       | 6.9603     | 46                                         | 11.3123       | 0.6153(0.0845-4.4777)  |
| INJURY, THROAT, NOS                                         | 0                                       | 0          | 1                                          | 0.4751        | 0(0-Inf)               |
| INJURY, THROAT, SUPERFICIAL, NOS                            | 1                                       | 6.9565     | 5                                          | 1.2152        | 5.7245(0.6506-50.3715) |
| INJURY, THUMB, CRUSH, NOS                                   | 0                                       | 0          | 32                                         | 7.9511        | 0(0-Inf)               |
| INJURY, THUMB, JOINT, NOS                                   | 1                                       | 11.3447    | 16                                         | 4.453         | 2.5476(0.3347-19.3941) |
| INJURY, THUMB, MUSCULOSKELETAL, LATE EFFECT                 | 0                                       | 0          | 1                                          | 0.4751        | 0(0-Inf)               |
| INJURY, THUMB, MUSCULOSKELETAL, NOS                         | 0                                       | 0          | 24                                         | 6.244         | 0(0-Inf)               |
| INJURY, TIBIAL ARTERY                                       | 0                                       | 0          | 1                                          | 0.3526        | 0(0-Inf)               |
| INJURY, TIBIAL VEIN                                         | 0                                       | 0          | 1                                          | 1.0363        | 0(0-Inf)               |
| INJURY, TOE JOINT, NOS                                      | 0                                       | 0          | 6                                          | 1.9839        | 0(0-Inf)               |
| INJURY, TOE NOS                                             | 2                                       | 15.7959    | 107                                        | 36.9022       | 0.428(0.1055-1.737)    |
| INJURY, TOE, CRUSH, LATE EFFECT                             | 0                                       | 0          | 2                                          | 0.432         | 0(0-Inf)               |
| INJURY, TOE, CRUSH, NOS                                     | 2                                       | 18.9465    | 17                                         | 4.5465        | 4.1673(0.9521-18.2396) |
| INJURY, TOE, MUSCULOSKELETAL, LATE EFFECT                   | 0                                       | 0          | 1                                          | 0.8528        | 0(0-Inf)               |
| INJURY, TOE, MUSCULOSKELETAL, NOS                           | 0                                       | 0          | 10                                         | 2.9883        | 0(0-Inf)               |
| INJURY, TOE, SUPERFICIAL, INFECTED                          | 0                                       | 0          | 4                                          | 1.3224        | 0(0-Inf)               |
| INJURY, TOE, SUPERFICIAL, LATE EFFECT                       | 0                                       | 0          | 3                                          | 2.094         | 0(0-Inf)               |
| INJURY, TOE, SUPERFICIAL, NOS                               | 6                                       | 48.8235    | 79                                         | 28.449        | 1.7162(0.7453-3.9518)  |
| INJURY, TONGUE NOS                                          | 0                                       | 0          | 13                                         | 6.7048        | 0(0-Inf)               |
| INJURY, TOOTH                                               | 5                                       | 36.1221    | 58                                         | 13.5488       | 2.6661(1.0628-6.6878)  |
| INJURY, TOOTH, LATE EFFECT                                  | 0                                       | 0          | 5                                          | 1.1528        | 0(0-Inf)               |
| INJURY, TRACTION (CODE ALSO INJURY NERVE BY SITE IF STATED) | 0                                       | 0          | 2                                          | 0.4853        | 0(0-Inf)               |
| INJURY, TRUNK, CRUSH, NOS                                   | 0                                       | 0          | 1                                          | 0.4751        | 0(0-Inf)               |
| INJURY, TRUNK, NOS                                          | 0                                       | 0          | 8                                          | 3.9371        | 0(0-Inf)               |
| INJURY, TRUNK, SUPERFICIAL, INFECTED                        | 0                                       | 0          | 2                                          | 0.5069        | 0(0-Inf)               |
| INJURY, TRUNK, SUPERFICIAL, NOS                             | 0                                       | 0          | 14                                         | 7.0642        | 0(0-Inf)               |
| INJURY, ULNAR ARTERY                                        | 0                                       | 0          | 5                                          | 1.2651        | 0(0-Inf)               |
| INJURY, URETER, DUE TO SURGICAL PROCEDURE                   | 0                                       | 0          | 1                                          | 0.2729        | 0(0-Inf)               |
| INJURY, URETHRA, NOS                                        | 0                                       | 0          | 21                                         | 45.4516       | 0(0-Inf)               |
| INJURY, VAGINA, SUPERFICIAL, NOS                            | 0                                       | 0          | 11                                         | 6.0535        | 0(0-Inf)               |
| INJURY, VOCAL CORD                                          | 0                                       | 0          | 1                                          | 0.8877        | 0(0-Inf)               |
| INJURY, VULVA, SUPERFICIAL, NOS                             | 0                                       | 0          | 5                                          | 1.0846        | 0(0-Inf)               |

| Description                                                  | No. of Positive Cases with Disease Code | Case Rate* | No. of Positive Controls with Disease Code | Control Rate* | Relative Risk (95%CI)  |
|--------------------------------------------------------------|-----------------------------------------|------------|--------------------------------------------|---------------|------------------------|
| INJURY, WHIPLASH                                             | 1                                       | 7.7031     | 24                                         | 5.6924        | 1.3532(0.1818-10.0729) |
| INJURY, WRIST JOINT, NOS                                     | 0                                       | 0          | 4                                          | 0.9751        | 0(0-Inf)               |
| INJURY, WRIST, CRUSH, NOS                                    | 0                                       | 0          | 2                                          | 0.5709        | 0(0-Inf)               |
| INJURY, WRIST, MUSCULOSKELETAL, LATE EFFECT                  | 0                                       | 0          | 3                                          | 0.7971        | 0(0-Inf)               |
| INJURY, WRIST, MUSCULOSKELETAL, NOS                          | 0                                       | 0          | 18                                         | 4.4485        | 0(0-Inf)               |
| INJURY, WRIST, NOS                                           | 5                                       | 36.1543    | 133                                        | 37.8671       | 0.9548(0.3899-2.3379)  |
| INJURY, WRIST, SUPERFICIAL, INFECTED                         | 0                                       | 0          | 2                                          | 1.8993        | 0(0-Inf)               |
| INJURY, WRIST, SUPERFICIAL, NOS                              | 0                                       | 0          | 23                                         | 6.5972        | 0(0-Inf)               |
| INSERTIONITIS (SEE ALSO TENOSYNOVITIS)                       | 0                                       | 0          | 20                                         | 4.8586        | 0(0-Inf)               |
| INSOMNIA, NOS                                                | 72                                      | 650.3764   | 1829                                       | 738.324       | 0.8809(0.6956-1.1154)  |
| INSOMNIA, PSYCHOPHYSIOLOGICAL                                | 5                                       | 38.2433    | 127                                        | 41.0402       | 0.9318(0.3803-2.2831)  |
| INSTABILITY, ELBOW                                           | 0                                       | 0          | 3                                          | 0.7175        | 0(0-Inf)               |
| INSTABILITY, ANKLE                                           | 0                                       | 0          | 11                                         | 5.0489        | 0(0-Inf)               |
| INSTABILITY, EMOTIONAL                                       | 0                                       | 0          | 1                                          | 0.398         | 0(0-Inf)               |
| INSTABILITY, HIP                                             | 1                                       | 10.0309    | 4                                          | 2.0062        | 4.9999(0.5474-45.6685) |
| INSTABILITY, JOINT, NEC/NOS                                  | 2                                       | 14.5653    | 87                                         | 20.7795       | 0.7009(0.1721-2.8552)  |
| INSTABILITY, KNEE                                            | 2                                       | 14.0502    | 141                                        | 34.8046       | 0.4037(0.0998-1.6326)  |
| INSTABILITY, NOS (DIZZINESS) (ORTHOSTATIC)                   | 0                                       | 0          | 12                                         | 4.2494        | 0(0-Inf)               |
| INSTABILITY, RADIOULNAR                                      | 0                                       | 0          | 1                                          | 0.2354        | 0(0-Inf)               |
| INSTABILITY, SACROILIAC                                      | 0                                       | 0          | 1                                          | 0.2354        | 0(0-Inf)               |
| INSTABILITY, SCAPHOLUNATE                                    | 0                                       | 0          | 2                                          | 1.0782        | 0(0-Inf)               |
| INSTABILITY, SHOULDER / GLENOHUMERAL                         | 1                                       | 6.9478     | 14                                         | 3.5778        | 1.9419(0.2525-14.9323) |
| INSTABILITY, SPINE                                           | 1                                       | 6.9384     | 48                                         | 11.8947       | 0.5833(0.0802-4.2409)  |
| INSTABILITY, TEMPERATURE, NOS                                | 0                                       | 0          | 2                                          | 1.0783        | 0(0-Inf)               |
| INSTABILITY, THUMB                                           | 0                                       | 0          | 5                                          | 1.6796        | 0(0-Inf)               |
| INSTABILITY, VASOMOTOR                                       | 1                                       | 8.0005     | 95                                         | 20.9849       | 0.3813(0.053-2.74)     |
| INSTABILITY, WRIST                                           | 0                                       | 0          | 8                                          | 2.3396        | 0(0-Inf)               |
| INSUFFICIENCY, ADRENAL                                       | 3                                       | 27.9972    | 31                                         | 13.9545       | 2.0063(0.6097-6.6021)  |
| INSUFFICIENCY, ANDROGEN                                      | 0                                       | 0          | 3                                          | 2.6653        | 0(0-Inf)               |
| INSUFFICIENCY, AORTIC, CALCIFIC, CODE ALSO BY CLASS IF GIVEN | 0                                       | 0          | 4                                          | 1.2655        | 0(0-Inf)               |
| INSUFFICIENCY, AORTIC, CLASS 1                               | 0                                       | 0          | 8                                          | 2.0005        | 0(0-Inf)               |
| INSUFFICIENCY, AORTIC, CLASS 2                               | 0                                       | 0          | 2                                          | 0.6774        | 0(0-Inf)               |
| INSUFFICIENCY, AORTIC, CLASS 3                               | 1                                       | 9.2559     | 9                                          | 2.4244        | 3.8178(0.4767-30.5775) |
| INSUFFICIENCY, AORTIC, CLASS 4                               | 0                                       | 0          | 4                                          | 1.0275        | 0(0-Inf)               |
| INSUFFICIENCY, AORTIC, MILD                                  | 12                                      | 114.8593   | 255                                        | 118.3218      | 0.9707(0.5432-1.7347)  |
| INSUFFICIENCY, AORTIC, MINIMAL                               | 0                                       | 0          | 6                                          | 1.6041        | 0(0-Inf)               |
| INSUFFICIENCY, AORTIC, MINOR                                 | 0                                       | 0          | 1                                          | 6.4893        | 0(0-Inf)               |
| INSUFFICIENCY, AORTIC, MODERATE                              | 2                                       | 18.9173    | 96                                         | 44.2765       | 0.4273(0.1052-1.736)   |

| Description                                                    | No. of Positive Cases with Disease Code | Case Rate* | No. of Positive Controls with Disease Code | Control Rate* | Relative Risk (95%CI)    |
|----------------------------------------------------------------|-----------------------------------------|------------|--------------------------------------------|---------------|--------------------------|
| INSUFFICIENCY, AORTIC, RHEUMATIC, CODE ALSO BY CLASS IF GIVEN  | 1                                       | 7.6289     | 19                                         | 4.3977        | 1.7347(0.2301-13.0757)   |
| INSUFFICIENCY, AORTIC, SEVERE                                  | 1                                       | 9.6639     | 41                                         | 19.5803       | 0.4936(0.0677-3.5973)    |
| INSUFFICIENCY, AORTIC, TRIVIAL                                 | 2                                       | 15.3624    | 25                                         | 8.1235        | 1.8911(0.4445-8.0453)    |
| INSUFFICIENCY, AORTIC--AI                                      | 10                                      | 87.2635    | 195                                        | 78.4255       | 1.1127(0.5882-2.1049)    |
| INSUFFICIENCY, ARTERIAL, NOS                                   | 2                                       | 21.9626    | 23                                         | 13.194        | 1.6646(0.3901-7.1025)    |
| INSUFFICIENCY, ARTERIAL, PERIPHERAL                            | 0                                       | 0          | 13                                         | 6.3733        | 0(0-Inf)                 |
| INSUFFICIENCY, BASILAR ARTERY                                  | 0                                       | 0          | 2                                          | 0.7057        | 0(0-Inf)                 |
| INSUFFICIENCY, CARDIAC                                         | 0                                       | 0          | 3                                          | 1.9014        | 0(0-Inf)                 |
| INSUFFICIENCY, CAROTID ARTERY                                  | 0                                       | 0          | 1                                          | 0.8881        | 0(0-Inf)                 |
| INSUFFICIENCY, CEREBROVASCULAR                                 | 0                                       | 0          | 11                                         | 3.321         | 0(0-Inf)                 |
| INSUFFICIENCY, CHRONOTROPIC, HEART                             | 1                                       | 15.6393    | 26                                         | 23.8901       | 0.6546(0.0886-4.8367)    |
| INSUFFICIENCY, CONVERGENCE                                     | 9                                       | 95.3907    | 131                                        | 70.6409       | 1.3504(0.6857-2.6595)    |
| INSUFFICIENCY, CORONARY                                        | 0                                       | 0          | 14                                         | 4.6154        | 0(0-Inf)                 |
| INSUFFICIENCY, DIVERGENCE                                      | 3                                       | 33.5232    | 71                                         | 41.6403       | 0.8051(0.253-2.5622)     |
| INSUFFICIENCY, EXOCRINE                                        | 0                                       | 0          | 3                                          | 1.3868        | 0(0-Inf)                 |
| INSUFFICIENCY, GLOTTIS                                         | 0                                       | 0          | 1                                          | 0.3526        | 0(0-Inf)                 |
| INSUFFICIENCY, GONADOTROPHIN HORMONE SECRETION                 | 1                                       | 8.4993     | 2                                          | 0.5671        | 14.9866(1.3196-170.2048) |
| INSUFFICIENCY, HEART VALVE PROSTHESIS, CODE ALSO STATUS #      | 2                                       | 25.5474    | 10                                         | 7.0465        | 3.6256(0.7864-16.7148)   |
| INSUFFICIENCY, HEPATIC                                         | 0                                       | 0          | 2                                          | 1.1971        | 0(0-Inf)                 |
| INSUFFICIENCY, HOMOGRAFT HEART VALVE, CODE ALSO                |                                         |            |                                            |               |                          |
| INSUFFICIENCY, VALVE BY SITE STATED                            | 0                                       | 0          | 1                                          | 0.4048        | 0(0-Inf)                 |
| INSUFFICIENCY, LYMPHATIC                                       | 0                                       | 0          | 1                                          | 0.405         | 0(0-Inf)                 |
| INSUFFICIENCY, MESENTERIC ARTERY                               | 0                                       | 0          | 1                                          | 2.4856        | 0(0-Inf)                 |
| INSUFFICIENCY, MITRAL, CLASS 1                                 | 1                                       | 7.1316     | 11                                         | 2.4947        | 2.8587(0.3635-22.4815)   |
| INSUFFICIENCY, MITRAL, CLASS 2                                 | 0                                       | 0          | 7                                          | 1.6655        | 0(0-Inf)                 |
| INSUFFICIENCY, MITRAL, CLASS 3                                 | 0                                       | 0          | 15                                         | 4.4101        | 0(0-Inf)                 |
| INSUFFICIENCY, MITRAL, CLASS 4                                 | 0                                       | 0          | 8                                          | 3.9379        | 0(0-Inf)                 |
| INSUFFICIENCY, MITRAL, CONGENITAL, CODE ALSO BY CLASS IF GIVEN | 0                                       | 0          | 2                                          | 0.5709        | 0(0-Inf)                 |
| INSUFFICIENCY, MITRAL, MILD                                    | 13                                      | 108.2822   | 374                                        | 139.4477      | 0.7765(0.4461-1.3518)    |
| INSUFFICIENCY, MITRAL, MINIMAL                                 | 2                                       | 14.2658    | 16                                         | 4.3923        | 3.2479(0.7372-14.3095)   |
| INSUFFICIENCY, MITRAL, MODERATE                                | 6                                       | 68.791     | 217                                        | 132.7858      | 0.5181(0.2299-1.1673)    |
| INSUFFICIENCY, MITRAL, NOS--MI                                 | 14                                      | 115.6434   | 403                                        | 146.1626      | 0.7912(0.4638-1.3498)    |
| INSUFFICIENCY, MITRAL, RHEUMATIC, CLASS 1                      | 0                                       | 0          | 5                                          | 1.8075        | 0(0-Inf)                 |
| INSUFFICIENCY, MITRAL, RHEUMATIC, CLASS 2                      | 1                                       | 14.8919    | 1                                          | 0.3477        | 42.8314(2.5532-718.5299) |
| INSUFFICIENCY, MITRAL, RHEUMATIC, CLASS 3                      | 0                                       | 0          | 2                                          | 0.7962        | 0(0-Inf)                 |
| INSUFFICIENCY, MITRAL, RHEUMATIC, CLASS 4                      | 0                                       | 0          | 1                                          | 0.398         | 0(0-Inf)                 |
| INSUFFICIENCY, MITRAL, RHEUMATIC, MILD                         | 0                                       | 0          | 6                                          | 1.682         | 0(0-Inf)                 |



| Description                                           | No. of Positive Cases with Disease Code | Case Rate* | No. of Positive Controls with Disease Code | Control Rate* | Relative Risk (95%CI)    |
|-------------------------------------------------------|-----------------------------------------|------------|--------------------------------------------|---------------|--------------------------|
| INSUFFICIENCY, MITRAL, RHEUMATIC, MODERATE            | 0                                       | 0          | 13                                         | 4.2448        | 0(0-Inf)                 |
| INSUFFICIENCY, MITRAL, RHEUMATIC, NOS                 | 1                                       | 7.0116     | 31                                         | 7.1551        | 0.98(0.133-7.2215)       |
| INSUFFICIENCY, MITRAL, RHEUMATIC, SEVERE              | 0                                       | 0          | 10                                         | 4.6886        | 0(0-Inf)                 |
| INSUFFICIENCY, MITRAL, SEVERE                         | 3                                       | 32.7083    | 187                                        | 106.0817      | 0.3083(0.0985-0.9655)    |
| INSUFFICIENCY, MITRAL, TRIVIAL                        | 0                                       | 0          | 46                                         | 12.462        | 0(0-Inf)                 |
| INSUFFICIENCY, MYOCARDIAL                             | 0                                       | 0          | 1                                          | 0.8879        | 0(0-Inf)                 |
| INSUFFICIENCY, OVARIAN                                | 0                                       | 0          | 4                                          | 2.7432        | 0(0-Inf)                 |
| INSUFFICIENCY, PALATOPHARYNGEAL                       | 0                                       | 0          | 1                                          | 0.2354        | 0(0-Inf)                 |
| INSUFFICIENCY, PANCREATIC                             | 0                                       | 0          | 17                                         | 8.4848        | 0(0-Inf)                 |
| INSUFFICIENCY, PITUITARY, ANTERIOR, NOS               | 0                                       | 0          | 2                                          | 0.4854        | 0(0-Inf)                 |
| INSUFFICIENCY, PITUITARY, ANTERIOR, PARTIAL           | 0                                       | 0          | 1                                          | 0.8877        | 0(0-Inf)                 |
| INSUFFICIENCY, PITUITARY, NOS                         | 0                                       | 0          | 4                                          | 1.5027        | 0(0-Inf)                 |
| INSUFFICIENCY, PITUITARY, PARTIAL                     | 0                                       | 0          | 2                                          | 0.5069        | 0(0-Inf)                 |
| INSUFFICIENCY, PLACENTAL (MOTHER'S HISTORY)           | 0                                       | 0          | 1                                          | 0.2728        | 0(0-Inf)                 |
| INSUFFICIENCY, PULMONARY (LUNG), SEE ALSO RESPIRATORY | 0                                       | 0          | 3                                          | 0.9165        | 0(0-Inf)                 |
| INSUFFICIENCY, PULMONARY VALVE                        | 0                                       | 0          | 2                                          | 0.7053        | 0(0-Inf)                 |
| INSUFFICIENCY, RENAL, ACUTE                           | 13                                      | 203.0195   | 203                                        | 189.4952      | 1.0714(0.6108-1.8793)    |
| INSUFFICIENCY, RENAL, CHRONIC                         | 86                                      | 1335.652   | 1267                                       | 1115.7328     | 1.1971(0.9617-1.4901)    |
| INSUFFICIENCY, RENAL, NOS                             | 103                                     | 1374.018   | 1500                                       | 1073.7959     | 1.2796(1.0474-1.5633)    |
| INSUFFICIENCY, RESPIRATORY, ACUTE                     | 1                                       | 14.0234    | 1                                          | 0.8071        | 17.3745(1.0513-287.1504) |
| INSUFFICIENCY, RESPIRATORY, CHRONIC                   | 0                                       | 0          | 11                                         | 4.4258        | 0(0-Inf)                 |
| INSUFFICIENCY, RESPIRATORY, NOS (AIRWAY)              | 1                                       | 10.2333    | 49                                         | 25.3528       | 0.4036(0.0556-2.9296)    |
| INSUFFICIENCY, ROTATOR CUFF                           | 3                                       | 28.7185    | 21                                         | 9.8093        | 2.9277(0.8657-9.9005)    |
| INSUFFICIENCY, SLEEP (SYNDROME)                       | 1                                       | 6.9567     | 76                                         | 21.05         | 0.3305(0.0459-2.3803)    |
| INSUFFICIENCY, SUPRARENAL, NOS                        | 0                                       | 0          | 2                                          | 0.8726        | 0(0-Inf)                 |
| INSUFFICIENCY, TEAR                                   | 0                                       | 0          | 4                                          | 1.1121        | 0(0-Inf)                 |
| INSUFFICIENCY, TESTOSTERONE                           | 1                                       | 7.8531     | 36                                         | 12.9543       | 0.6062(0.0829-4.4334)    |
| INSUFFICIENCY, TRICUSPID, CLASS 3                     | 0                                       | 0          | 1                                          | 0.8889        | 0(0-Inf)                 |
| INSUFFICIENCY, TRICUSPID, CLASS 4                     | 0                                       | 0          | 2                                          | 1.8978        | 0(0-Inf)                 |
| INSUFFICIENCY, TRICUSPID, MILD                        | 4                                       | 33.8205    | 56                                         | 21.5212       | 1.5715(0.5671-4.3545)    |
| INSUFFICIENCY, TRICUSPID, MODERATE                    | 1                                       | 12.0213    | 52                                         | 34.7792       | 0.3456(0.0477-2.5051)    |
| INSUFFICIENCY, TRICUSPID, NOS--TI                     | 3                                       | 27.6807    | 60                                         | 26.395        | 1.0487(0.3277-3.3558)    |
| INSUFFICIENCY, TRICUSPID, RHEUMATIC, CLASS 1          | 0                                       | 0          | 1                                          | 0.2354        | 0(0-Inf)                 |
| INSUFFICIENCY, TRICUSPID, RHEUMATIC, CLASS 4          | 0                                       | 0          | 1                                          | 0.398         | 0(0-Inf)                 |
| INSUFFICIENCY, TRICUSPID, RHEUMATIC, MILD             | 0                                       | 0          | 2                                          | 0.6309        | 0(0-Inf)                 |
| INSUFFICIENCY, TRICUSPID, RHEUMATIC, MODERATE         | 0                                       | 0          | 1                                          | 0.405         | 0(0-Inf)                 |
| INSUFFICIENCY, TRICUSPID, RHEUMATIC, NOS              | 1                                       | 6.9256     | 5                                          | 1.1417        | 6.0662(0.6872-53.5489)   |
| INSUFFICIENCY, TRICUSPID, RHEUMATIC, SEVERE           | 0                                       | 0          | 4                                          | 1.6193        | 0(0-Inf)                 |
| INSUFFICIENCY, TRICUSPID, SEVERE                      | 2                                       | 25.519     | 83                                         | 59.7443       | 0.4271(0.1049-1.7392)    |
| INSUFFICIENCY, VASCULAR, NOS                          | 0                                       | 0          | 34                                         | 18.3978       | 0(0-Inf)                 |

| Description                                                             | No. of Positive Cases with Disease Code | Case Rate* | No. of Positive Controls with Disease Code | Control Rate* | Relative Risk (95%CI)  |
|-------------------------------------------------------------------------|-----------------------------------------|------------|--------------------------------------------|---------------|------------------------|
| INSUFFICIENCY, VASCULAR, PERIPHERAL                                     | 0                                       | 0          | 9                                          | 6.1489        | 0(0-Inf)               |
| INSUFFICIENCY, VELOPHARYNGEAL                                           | 0                                       | 0          | 2                                          | 0.8096        | 0(0-Inf)               |
| INSUFFICIENCY, VENOUS                                                   | 26                                      | 235.6018   | 586                                        | 244.5804      | 0.9633(0.6497-1.4283)  |
| INSUFFICIENCY, VENOUS, CHRONIC                                          | 12                                      | 139.5668   | 230                                        | 143.0345      | 0.9758(0.5453-1.746)   |
| INSUFFICIENCY, VENOUS, DEEP, CHRONIC                                    | 3                                       | 21.6454    | 82                                         | 23.5137       | 0.9205(0.2899-2.9226)  |
| INSUFFICIENCY, VERTEBRAL ARTERY                                         | 0                                       | 0          | 1                                          | 0.2729        | 0(0-Inf)               |
| INSUFFICIENCY, VERTEBROBASILAR                                          | 4                                       | 43.8921    | 28                                         | 15.7397       | 2.7886(0.9725-7.9966)  |
| INSULINOMA, NOS (BENIGN)                                                | 0                                       | 0          | 2                                          | 0.5709        | 0(0-Inf)               |
| INSULT VASONERVORUM                                                     | 0                                       | 0          | 1                                          | 0.234         | 0(0-Inf)               |
| INTENSIVE CARE, INFANT--ICUI                                            | 0                                       | 0          | 1                                          | 0.2354        | 0(0-Inf)               |
| INTENSIVE CARE, METHODIST HOSPITAL--ICUM                                | 17                                      | 124.5907   | 201                                        | 58.83         | 2.1178(1.2873-3.484)   |
| INTENSIVE CARE, NOS                                                     | 1                                       | 7.3281     | 17                                         | 4.1837        | 1.7516(0.2311-13.274)  |
| INTENSIVE CARE, SAINT MARYS HOSPITAL--ICUS                              | 52                                      | 421.1407   | 733                                        | 249.2682      | 1.6895(1.2736-2.2412)  |
| INTERRUPTED, PARS ARTICULARIS, SEE ALSO SPONDYLOLISTHESIS               | 0                                       | 0          | 1                                          | 0.3526        | 0(0-Inf)               |
| INTERTRIGO, CANDIDAL                                                    | 5                                       | 39.2153    | 167                                        | 56.6694       | 0.692(0.2837-1.6878)   |
| INTERTRIGO, NOS                                                         | 27                                      | 216.8766   | 695                                        | 238.3875      | 0.9098(0.6187-1.3377)  |
| INTOLERANCE, CARBOHYDRATE                                               | 1                                       | 6.9968     | 84                                         | 22.8749       | 0.3059(0.0425-2.2003)  |
| INTOLERANCE, COLD                                                       | 2                                       | 18.6545    | 69                                         | 31.2024       | 0.5979(0.1462-2.4451)  |
| INTOLERANCE, CONTACT LENS                                               | 1                                       | 7.722      | 20                                         | 4.725         | 1.6343(0.2175-12.2792) |
| INTOLERANCE, DRUG, SEE ALSO EFFECT, ADVERSE BY DRUG                     | 1                                       | 8.0985     | 20                                         | 7.2111        | 1.1231(0.1498-8.422)   |
| INTOLERANCE, FAT                                                        | 0                                       | 0          | 1                                          | 0.234         | 0(0-Inf)               |
| INTOLERANCE, FOOD                                                       | 1                                       | 7.3753     | 12                                         | 3.6139        | 2.0408(0.2622-15.883)  |
| INTOLERANCE, GLUCOSE                                                    | 63                                      | 509.1346   | 2099                                       | 747.341       | 0.6813(0.53-0.8758)    |
| INTOLERANCE, HEAT                                                       | 0                                       | 0          | 26                                         | 6.2277        | 0(0-Inf)               |
| INTOLERANCE, LACTOSE                                                    | 3                                       | 21.9487    | 91                                         | 26.7651       | 0.8201(0.2588-2.5982)  |
| INTOLERANCE, MILK                                                       | 0                                       | 0          | 6                                          | 1.5046        | 0(0-Inf)               |
| INTOXICATION, DRUG, NON-PSYCHOTIC, CODE ALSO EFFECT ADVERSE DRUG STATED | 1                                       | 7.091      | 3                                          | 0.8141        | 8.7103(0.8715-87.0571) |
| INTOXICATION, DRUG, PSYCHOTIC, CODE ALSO EFFECT ADVERSE DRUG STATED     | 1                                       | 7.0065     | 7                                          | 1.8443        | 3.799(0.4581-31.5026)  |
| INTOXICATION, WATER                                                     | 0                                       | 0          | 6                                          | 1.5882        | 0(0-Inf)               |
| INTRATHORACIC, STOMACH                                                  | 2                                       | 20.1322    | 28                                         | 14.3968       | 1.3984(0.3312-5.9044)  |
| INTRAUTERINE CONTRACEPTIVE DEVICE (IUD)--IUD                            | 1                                       | 57.4964    | 52                                         | 48.9913       | 1.1736(0.1621-8.4977)  |
| INTUSSUSCEPTION, COLON                                                  | 1                                       | 7.5567     | 4                                          | 0.8641        | 8.7452(0.9429-81.1053) |
| INTUSSUSCEPTION, SMALL INTESTINE                                        | 0                                       | 0          | 3                                          | 0.8116        | 0(0-Inf)               |
| INVAGINATION (BASILAR)                                                  | 0                                       | 0          | 7                                          | 1.9425        | 0(0-Inf)               |
| INVERSION, APPENDIX                                                     | 0                                       | 0          | 1                                          | 0.3526        | 0(0-Inf)               |
| INVERSION, FOOT, ACQUIRED                                               | 0                                       | 0          | 1                                          | 0.4048        | 0(0-Inf)               |
| INVERSION, NIPPLE, CONGENITAL                                           | 0                                       | 0          | 1                                          | 0.398         | 0(0-Inf)               |

| Description                                                        | No. of Positive Cases with Disease Code | Case Rate* | No. of Positive Controls with Disease Code | Control Rate* | Relative Risk (95%CI)  |
|--------------------------------------------------------------------|-----------------------------------------|------------|--------------------------------------------|---------------|------------------------|
| INVERSION, NIPPLE, NOS                                             | 0                                       | 0          | 33                                         | 15.5764       | 0(0-Inf)               |
| INVOLUNTARY MOVEMENT DISORDERS                                     | 0                                       | 0          | 5                                          | 2.0352        | 0(0-Inf)               |
| INVOLUTION, OVARY                                                  | 0                                       | 0          | 3                                          | 0.8034        | 0(0-Inf)               |
| IRIDOCYCLITIS, CHRONIC                                             | 0                                       | 0          | 2                                          | 0.7054        | 0(0-Inf)               |
| IRIDOCYCLITIS, HETEROCHROMIC, SEE ALSO CYCLITIS                    | 0                                       | 0          | 4                                          | 0.9752        | 0(0-Inf)               |
| IRIDOCYCLITIS, NOS                                                 | 1                                       | 7.4067     | 8                                          | 1.7723        | 4.1791(0.5121-34.108)  |
| IRIDODIALYSIS                                                      | 0                                       | 0          | 5                                          | 1.2298        | 0(0-Inf)               |
| IRIDOPLEGIA                                                        | 0                                       | 0          | 2                                          | 0.5475        | 0(0-Inf)               |
| IRIDOSCHISIS                                                       | 0                                       | 0          | 1                                          | 0.4049        | 0(0-Inf)               |
| IRIS, BOMBE                                                        | 0                                       | 0          | 2                                          | 0.7897        | 0(0-Inf)               |
| IRIS, CAPTURE                                                      | 0                                       | 0          | 1                                          | 0.2354        | 0(0-Inf)               |
| IRITIS, ACUTE                                                      | 1                                       | 7.6858     | 17                                         | 5.5428        | 1.3866(0.183-10.5091)  |
| IRITIS, CHRONIC                                                    | 2                                       | 22.1197    | 5                                          | 2.8925        | 7.6474(1.4553-40.1874) |
| IRITIS, HETEROCHROMIC                                              | 0                                       | 0          | 6                                          | 1.2964        | 0(0-Inf)               |
| IRITIS, NOS                                                        | 9                                       | 63.3571    | 142                                        | 37.6214       | 1.6841(0.8557-3.3145)  |
| IRITIS, SECONDARY, INFECTIOUS                                      | 0                                       | 0          | 1                                          | 0.8877        | 0(0-Inf)               |
| IRITIS, TRAUMATIC                                                  | 0                                       | 0          | 20                                         | 5.4829        | 0(0-Inf)               |
| IRREGULAR, EYE MOVEMENTS                                           | 0                                       | 0          | 4                                          | 0.8813        | 0(0-Inf)               |
| IRREGULAR, PROSTATE (CONTOUR) (ASYMMETRICAL) (NO MALIGNANCY FOUND) | 2                                       | 41.3027    | 59                                         | 62.7619       | 0.6581(0.1605-2.6987)  |
| IRREGULAR, SHEDDING (MENSTRUAL)                                    | 0                                       | 0          | 14                                         | 13.6454       | 0(0-Inf)               |
| IRREGULARITY, ALVEOLAR PROCESS                                     | 3                                       | 22.04      | 69                                         | 20.7607       | 1.0616(0.333-3.3847)   |
| IRREGULARITY, BRONCHUS (MUCOSAL)                                   | 0                                       | 0          | 7                                          | 2.7934        | 0(0-Inf)               |
| IRREGULARITY, CARDIA (SQUAMOCOLUMNAR JUNCTION)                     | 0                                       | 0          | 26                                         | 9.2828        | 0(0-Inf)               |
| IRREGULARITY, CARDIAC, NOS                                         | 6                                       | 59.0763    | 184                                        | 89.2074       | 0.6622(0.2932-1.4956)  |
| IRREGULARITY, COLON                                                | 0                                       | 0          | 7                                          | 4.0421        | 0(0-Inf)               |
| IRREGULARITY, CONTOUR OF CORNEA                                    | 0                                       | 0          | 3                                          | 0.7021        | 0(0-Inf)               |
| IRREGULARITY, MENSTRUAL                                            | 7                                       | 140.7474   | 373                                        | 138.3318      | 1.0175(0.4814-2.1505)  |
| IRREGULARITY, MENSTRUAL, FUNCTIONAL                                | 0                                       | 0          | 3                                          | 1.5101        | 0(0-Inf)               |
| IRREGULARITY, MENSTRUATION, PHYSIOLOGIC                            | 0                                       | 0          | 1                                          | 0.234         | 0(0-Inf)               |
| IRREGULARITY, PUPIL                                                | 0                                       | 0          | 2                                          | 1.0782        | 0(0-Inf)               |
| IRREGULARITY, RESPIRATORY                                          | 0                                       | 0          | 2                                          | 0.5908        | 0(0-Inf)               |
| IRRIGATION, AND DEBRIDEMENT (ADMISSION FOR)                        | 2                                       | 17.9432    | 151                                        | 64.4727       | 0.2783(0.0689-1.1241)  |
| IRRIGATION, OF POST OP WOUND                                       | 0                                       | 0          | 11                                         | 3.7782        | 0(0-Inf)               |
| IRRITABLE, BEHAVIOR, CHILD                                         | 0                                       | 0          | 3                                          | 1.148         | 0(0-Inf)               |
| IRRITABLE, BEHAVIOR, NOS                                           | 1                                       | 12.9355    | 31                                         | 22.3647       | 0.5784(0.0787-4.2488)  |
| IRRITABLE, BLADDER                                                 | 0                                       | 0          | 69                                         | 20.242        | 0(0-Inf)               |
| IRRITABLE, BOWEL                                                   | 12                                      | 85.1728    | 436                                        | 115.6692      | 0.7363(0.4144-1.3085)  |
| IRRITABLE, BRONCHUS                                                | 0                                       | 0          | 9                                          | 2.2146        | 0(0-Inf)               |
| IRRITABLE, COLON                                                   | 3                                       | 21.6573    | 49                                         | 11.3938       | 1.9008(0.589-6.1346)   |

| Description                                              | No. of Positive Cases with Disease Code | Case Rate* | No. of Positive Controls with Disease Code | Control Rate* | Relative Risk (95%CI)   |
|----------------------------------------------------------|-----------------------------------------|------------|--------------------------------------------|---------------|-------------------------|
| IRRITABLE, HEART                                         | 0                                       | 0          | 17                                         | 5.0428        | 0(0-Inf)                |
| IRRITABLE, RECTUM                                        | 0                                       | 0          | 2                                          | 0.5709        | 0(0-Inf)                |
| IRRITABLE, STOMACH, NOS                                  | 0                                       | 0          | 16                                         | 3.9016        | 0(0-Inf)                |
| IRRITATION, ANUS                                         | 4                                       | 31.0773    | 68                                         | 22.7523       | 1.3659(0.4964-3.7583)   |
| IRRITATION, BLADDER (NECK)                               | 0                                       | 0          | 22                                         | 8.1377        | 0(0-Inf)                |
| IRRITATION, BRACHIAL PLEXUS                              | 0                                       | 0          | 1                                          | 0.827         | 0(0-Inf)                |
| IRRITATION, CONJUNCTIVA                                  | 2                                       | 14.4578    | 36                                         | 10.618        | 1.3616(0.3261-5.6854)   |
| IRRITATION, CRANIAL NERVE, NEC                           | 0                                       | 0          | 1                                          | 0.2729        | 0(0-Inf)                |
| IRRITATION, EYELID                                       | 0                                       | 0          | 19                                         | 5.369         | 0(0-Inf)                |
| IRRITATION, GASTROINTESTINAL                             | 1                                       | 6.9235     | 11                                         | 2.8572        | 2.4232(0.309-19.0027)   |
| IRRITATION, GENITALIA, FEMALE, NEC (VULVA; LABIA)        | 4                                       | 31.3292    | 52                                         | 17.6575       | 1.7743(0.6379-4.9347)   |
| IRRITATION, LABYRINTH                                    | 0                                       | 0          | 3                                          | 0.964         | 0(0-Inf)                |
| IRRITATION, LUMBOSACRAL PLEXUS                           | 0                                       | 0          | 2                                          | 0.5837        | 0(0-Inf)                |
| IRRITATION, MUSCLE                                       | 1                                       | 7.423      | 17                                         | 5.1698        | 1.4358(0.1894-10.8846)  |
| IRRITATION, NERVE SEE ALSO COMPRESSION NERVE             | 2                                       | 14.6098    | 26                                         | 6.0758        | 2.4046(0.5657-10.2204)  |
| IRRITATION, NOSE                                         | 2                                       | 15.0216    | 47                                         | 14.5823       | 1.0301(0.2491-4.2602)   |
| IRRITATION, OCULAR                                       | 7                                       | 51.3396    | 267                                        | 79.6405       | 0.6446(0.3039-1.3674)   |
| IRRITATION, PENIS                                        | 2                                       | 31.1432    | 15                                         | 10.6829       | 2.9152(0.6614-12.8493)  |
| IRRITATION, PERINEUM                                     | 3                                       | 22.2575    | 41                                         | 12.2718       | 1.8137(0.5579-5.8964)   |
| IRRITATION, PHARYNX                                      | 3                                       | 21.6656    | 93                                         | 27.1337       | 0.7985(0.2522-2.5279)   |
| IRRITATION, PLANTAR NERVE                                | 0                                       | 0          | 1                                          | 0.2354        | 0(0-Inf)                |
| IRRITATION, RADIAL NERVE                                 | 0                                       | 0          | 5                                          | 1.2868        | 0(0-Inf)                |
| IRRITATION, ROOT, CERVICAL                               | 2                                       | 16.4047    | 52                                         | 12.7266       | 1.289(0.3126-5.3157)    |
| IRRITATION, ROOT, LUMBAR                                 | 2                                       | 14.1773    | 50                                         | 11.8486       | 1.1965(0.2898-4.941)    |
| IRRITATION, ROOT, NOS                                    | 1                                       | 8.9012     | 30                                         | 7.6975        | 1.1564(0.1569-8.5241)   |
| IRRITATION, SCIATIC NERVE                                | 1                                       | 7.2738     | 18                                         | 4.3083        | 1.6883(0.2235-12.7537)  |
| IRRITATION, STOMA, CODE ALSO COMPLICATION BY SITE STATED | 0                                       | 0          | 2                                          | 1.1971        | 0(0-Inf)                |
| IRRITATION, ULNAR NERVE                                  | 1                                       | 6.9467     | 21                                         | 5.1764        | 1.342(0.1791-10.0532)   |
| IRRITATION, URETHRAL                                     | 4                                       | 28.1039    | 28                                         | 7.6177        | 3.6893(1.2822-10.6149)  |
| IRRITATION, VAGINA                                       | 1                                       | 13.8441    | 117                                        | 53.5655       | 0.2585(0.036-1.8534)    |
| ISCHEMIA, ARM                                            | 2                                       | 18.9598    | 21                                         | 9.6766        | 1.9593(0.456-8.4195)    |
| ISCHEMIA, CEREBRAL                                       | 3                                       | 29.9666    | 100                                        | 49.9953       | 0.5994(0.1897-1.8939)   |
| ISCHEMIA, CEREBRAL, OLD                                  | 1                                       | 10.6705    | 5                                          | 2.8323        | 3.7674(0.4321-32.846)   |
| ISCHEMIA, CEREBRAL, RECURRENT FOCAL, NOS                 | 0                                       | 0          | 1                                          | 0.8889        | 0(0-Inf)                |
| ISCHEMIA, CEREBRAL, TRANSIENT, NOS, SEE ALSO ATTACK      | 0                                       | 0          | 11                                         | 5.1901        | 0(0-Inf)                |
| ISCHEMIA, CEREBRAL, TRANSIENT, WITH NEUROLOGIC DEFICIT   | 1                                       | 9.9579     | 1                                          | 0.4946        | 20.1347(1.204-336.7229) |
| ISCHEMIA, CORONARY, ACUTE OR SUBACUTE                    | 0                                       | 0          | 5                                          | 2.5957        | 0(0-Inf)                |
| ISCHEMIA, CORONARY, NOS                                  | 10                                      | 98.2447    | 171                                        | 83.1796       | 1.1811(0.6231-2.2389)   |

| Description                                                 | No. of Positive Cases with Disease Code | Case Rate* | No. of Positive Controls with Disease Code | Control Rate* | Relative Risk (95%CI)   |
|-------------------------------------------------------------|-----------------------------------------|------------|--------------------------------------------|---------------|-------------------------|
| ISCHEMIA, INTESTINE, DUE TO MESENTERIC ARTERY INSUFFICIENCY | 0                                       | 0          | 1                                          | 0.8877        | 0(0-Inf)                |
| ISCHEMIA, INTESTINE, NOS                                    | 5                                       | 45.93      | 64                                         | 28.3128       | 1.6222(0.6501-4.0482)   |
| ISCHEMIA, LEG                                               | 9                                       | 106.2213   | 164                                        | 102.9761      | 1.0315(0.5264-2.0212)   |
| ISCHEMIA, MESENTERIC ARTERY INSUFFICIENCY                   | 1                                       | 11.6525    | 26                                         | 16.7198       | 0.6969(0.0942-5.1557)   |
| ISCHEMIA, MYOCARDIAL (SUBENDOCARDIAL)                       | 3                                       | 27.2598    | 79                                         | 34.1432       | 0.7984(0.2514-2.5352)   |
| ISCHEMIA, MYOCARDIAL, ACUTE                                 | 2                                       | 21.4716    | 35                                         | 19.2222       | 1.117(0.2677-4.6611)    |
| ISCHEMIA, NOS                                               | 2                                       | 20.1279    | 78                                         | 39.3582       | 0.5114(0.1254-2.0855)   |
| ISCHEMIA, RENAL                                             | 1                                       | 6.8594     | 2                                          | 0.552         | 12.426(1.0939-141.1471) |
| ISCHEMIA, RETINAL                                           | 1                                       | 10.1184    | 22                                         | 11.1777       | 0.9052(0.1214-6.7479)   |
| ISCHEMIA, SPINAL CORD                                       | 0                                       | 0          | 2                                          | 2.9798        | 0(0-Inf)                |
| ISCHEMIA, SUBENDOCARDIAL, ACUTE                             | 0                                       | 0          | 1                                          | 0.8528        | 0(0-Inf)                |
| ISCHIALGIA                                                  | 0                                       | 0          | 1                                          | 1.906         | 0(0-Inf)                |
| ITCH, NOS, SEE ALSO PRURITUS                                | 9                                       | 81.8494    | 181                                        | 78.2495       | 1.046(0.5345-2.0471)    |
| ITCH, SWIMMER'S                                             | 0                                       | 0          | 5                                          | 1.7496        | 0(0-Inf)                |
| ITCH, WINTER                                                | 1                                       | 19.0491    | 2                                          | 2.3953        | 7.9528(0.7089-89.2202)  |
| JAUNDICE, MALIGNANT                                         | 0                                       | 0          | 3                                          | 2.821         | 0(0-Inf)                |
| JAUNDICE, NEWBORN                                           | 0                                       | 0          | 9                                          | 6.8509        | 0(0-Inf)                |
| JAUNDICE, NOS, SEE ALSO ICTERUS                             | 3                                       | 31.3702    | 64                                         | 34.1428       | 0.9188(0.2879-2.9325)   |
| JAUNDICE, OBSTRUCTIVE, NOS                                  | 3                                       | 23.0525    | 58                                         | 19.0291       | 1.2114(0.378-3.8819)    |
| JEJUNITIS (SEE ALSO ENTERITIS)                              | 0                                       | 0          | 4                                          | 1.0273        | 0(0-Inf)                |
| JERK, MYOCLONIC                                             | 1                                       | 10.2371    | 10                                         | 5.2032        | 1.9675(0.2492-15.5326)  |
| JERK, NOS, SEE ALSO SPASM                                   | 0                                       | 0          | 13                                         | 6.6954        | 0(0-Inf)                |
| JOCK ITCH                                                   | 0                                       | 0          | 1                                          | 0.3526        | 0(0-Inf)                |
| JOGGER'S, BLADDER                                           | 0                                       | 0          | 1                                          | 0.2729        | 0(0-Inf)                |
| J-SHAPED STOMACH                                            | 0                                       | 0          | 6                                          | 2.296         | 0(0-Inf)                |
| JUMPER'S KNEE                                               | 0                                       | 0          | 1                                          | 0.2354        | 0(0-Inf)                |
| KELOID, HEAD OR NECK                                        | 0                                       | 0          | 31                                         | 8.1211        | 0(0-Inf)                |
| KELOID, LOWER EXTREMITY                                     | 0                                       | 0          | 8                                          | 2.0609        | 0(0-Inf)                |
| KELOID, NOS                                                 | 0                                       | 0          | 25                                         | 6.6085        | 0(0-Inf)                |
| KELOID, TRUNK                                               | 1                                       | 7.1693     | 50                                         | 11.7376       | 0.6108(0.0841-4.4371)   |
| KELOID, UPPER EXTREMITY                                     | 1                                       | 6.9594     | 17                                         | 4.4508        | 1.5636(0.2063-11.8522)  |
| KERATITIS, ACTINIC                                          | 2                                       | 20.4458    | 21                                         | 10.8223       | 1.8892(0.4401-8.1091)   |
| KERATITIS, ALLERGIC                                         | 0                                       | 0          | 3                                          | 1.0184        | 0(0-Inf)                |
| KERATITIS, CHEMICAL                                         | 0                                       | 0          | 32                                         | 11.2134       | 0(0-Inf)                |
| KERATITIS, DENDRITIC                                        | 0                                       | 0          | 2                                          | 1.0784        | 0(0-Inf)                |
| KERATITIS, DISCIFORMIS                                      | 1                                       | 12.3135    | 3                                          | 2.003         | 6.1476(0.6268-60.2976)  |
| KERATITIS, EXPOSURE                                         | 0                                       | 0          | 19                                         | 9.857         | 0(0-Inf)                |
| KERATITIS, FILAMENTARY                                      | 1                                       | 9.426      | 13                                         | 6.0634        | 1.5546(0.2014-11.9967)  |
| KERATITIS, HERPETIC (SIMPLEX)                               | 3                                       | 21.8825    | 62                                         | 18.3126       | 1.1949(0.3736-3.8224)   |

| Description                                    | No. of Positive Cases with Disease Code | Case Rate* | No. of Positive Controls with Disease Code | Control Rate* | Relative Risk (95%CI)  |
|------------------------------------------------|-----------------------------------------|------------|--------------------------------------------|---------------|------------------------|
| KERATITIS, HERPETIC (ZOSTER)                   | 0                                       | 0          | 12                                         | 9.6956        | 0(0-Inf)               |
| KERATITIS, INTERSTITIAL, NEC                   | 0                                       | 0          | 2                                          | 1.1615        | 0(0-Inf)               |
| KERATITIS, INTERSTITIAL, SYPHILITIC            | 0                                       | 0          | 1                                          | 0.2354        | 0(0-Inf)               |
| KERATITIS, MACULAR                             | 0                                       | 0          | 1                                          | 0.4049        | 0(0-Inf)               |
| KERATITIS, MARGINAL                            | 0                                       | 0          | 25                                         | 6.8181        | 0(0-Inf)               |
| KERATITIS, NEC                                 | 0                                       | 0          | 18                                         | 5.5746        | 0(0-Inf)               |
| KERATITIS, NOS                                 | 5                                       | 35.9584    | 124                                        | 29.1773       | 1.2324(0.5025-3.0224)  |
| KERATITIS, PHLYCTENULAR                        | 0                                       | 0          | 1                                          | 0.8271        | 0(0-Inf)               |
| KERATITIS, POST HERPETIC (ZOSTER)              | 1                                       | 7.5707     | 8                                          | 2.5743        | 2.9409(0.3623-23.871)  |
| KERATITIS, PUNCTATE                            | 5                                       | 34.8674    | 133                                        | 34.2268       | 1.0187(0.416-2.4947)   |
| KERATITIS, SCLEROSING                          | 0                                       | 0          | 1                                          | 0.3526        | 0(0-Inf)               |
| KERATITIS, SICCA                               | 8                                       | 56.4011    | 71                                         | 16.4898       | 3.4204(1.636-7.1511)   |
| KERATITIS, THYGESON                            | 0                                       | 0          | 3                                          | 0.8018        | 0(0-Inf)               |
| KERATITIS, TRAUMATIC                           | 0                                       | 0          | 1                                          | 0.2729        | 0(0-Inf)               |
| KERATITIS, ULCERATIVE                          | 0                                       | 0          | 2                                          | 0.7896        | 0(0-Inf)               |
| KERATOACANTHOMA                                | 19                                      | 159.9283   | 217                                        | 80.5551       | 1.9853(1.2395-3.18)    |
| KERATOCONJUNCTIVITIS, DUE TO HERPES ZOSTER     | 0                                       | 0          | 1                                          | 0.4048        | 0(0-Inf)               |
| KERATOCONJUNCTIVITIS, EPIDEMIC                 | 0                                       | 0          | 8                                          | 1.9194        | 0(0-Inf)               |
| KERATOCONJUNCTIVITIS, EXPOSURE                 | 0                                       | 0          | 3                                          | 0.9778        | 0(0-Inf)               |
| KERATOCONJUNCTIVITIS, LIMBAL                   | 0                                       | 0          | 3                                          | 0.6535        | 0(0-Inf)               |
| KERATOCONJUNCTIVITIS, NEC                      | 0                                       | 0          | 3                                          | 0.7175        | 0(0-Inf)               |
| KERATOCONJUNCTIVITIS, NEUROTROPHIC             | 0                                       | 0          | 1                                          | 0.4048        | 0(0-Inf)               |
| KERATOCONJUNCTIVITIS, NOS (SEE ALSO KERATITIS) | 2                                       | 14.2741    | 61                                         | 14.4064       | 0.9908(0.2413-4.0681)  |
| KERATOCONJUNCTIVITIS, SICCA                    | 14                                      | 99.8658    | 331                                        | 88.1182       | 1.1333(0.6626-1.9384)  |
| KERATOCONUS, NOS                               | 1                                       | 11.2976    | 22                                         | 6.4394        | 1.7544(0.2349-13.1029) |
| KERATOCYST                                     | 1                                       | 6.9315     | 9                                          | 2.3083        | 3.0029(0.3746-24.0719) |
| KERATODERMA, CLIMACTERIUM                      | 0                                       | 0          | 2                                          | 0.432         | 0(0-Inf)               |
| KERATODERMA, NOS                               | 0                                       | 0          | 23                                         | 6.4002        | 0(0-Inf)               |
| KERATODERMA, PLANTAR                           | 0                                       | 0          | 11                                         | 2.7027        | 0(0-Inf)               |
| KERATODERMA, PUNCTATA                          | 0                                       | 0          | 4                                          | 0.9671        | 0(0-Inf)               |
| KERATOLYSIS EXFOLIATIVE, ACQUIRED              | 1                                       | 13.2914    | 4                                          | 1.5036        | 8.8397(0.97-80.5556)   |
| KERATOLYSIS EXFOLIATIVE, NOS                   | 0                                       | 0          | 1                                          | 0.2354        | 0(0-Inf)               |
| KERATOMA, NOS                                  | 4                                       | 29.7985    | 107                                        | 32.7781       | 0.9091(0.3341-2.4735)  |
| KERATOPATHY, BAND                              | 1                                       | 9.8702     | 18                                         | 9.1267        | 1.0815(0.1434-8.1555)  |
| KERATOPATHY, BULLOUS                           | 4                                       | 47.9279    | 36                                         | 23.5785       | 2.0327(0.72-5.7388)    |
| KERATOPATHY, CHLOROQUINE                       | 0                                       | 0          | 1                                          | 0.4048        | 0(0-Inf)               |
| KERATOPATHY, NOS                               | 8                                       | 64.2825    | 131                                        | 46.1352       | 1.3933(0.6804-2.8534)  |
| KERATOSIS, ACTINIC--AKER                       | 218                                     | 2349.446   | 5061                                       | 2365.5229     | 0.9932(0.867-1.1378)   |
| KERATOSIS, CONGENITAL                          | 0                                       | 0          | 1                                          | 0.4751        | 0(0-Inf)               |
| KERATOSIS, FOLLICULAR                          | 4                                       | 30.3418    | 98                                         | 31.5238       | 0.9625(0.3533-2.6225)  |

| Description                                                            | No. of Positive Cases with Disease Code | Case Rate* | No. of Positive Controls with Disease Code | Control Rate* | Relative Risk (95%CI)  |
|------------------------------------------------------------------------|-----------------------------------------|------------|--------------------------------------------|---------------|------------------------|
| KERATOSIS, GENITAL, FEMALE                                             | 0                                       | 0          | 17                                         | 7.9657        | 0(0-Inf)               |
| KERATOSIS, LICHEN PLANUS LIKE                                          | 2                                       | 13.93      | 49                                         | 12.5693       | 1.1083(0.2683-4.5786)  |
| KERATOSIS, NOS                                                         | 62                                      | 462.926    | 1584                                       | 449.7447      | 1.0293(0.798-1.3277)   |
| KERATOSIS, OBTURANS                                                    | 0                                       | 0          | 3                                          | 0.8458        | 0(0-Inf)               |
| KERATOSIS, PALMARIS ET PLANTARIS                                       | 0                                       | 0          | 1                                          | 0.2729        | 0(0-Inf)               |
| KERATOSIS, PILARIS, ACQUIRED                                           | 1                                       | 11.8162    | 8                                          | 2.3045        | 5.1275(0.6305-41.6962) |
| KERATOSIS, PILARIS, NOS                                                | 0                                       | 0          | 15                                         | 3.6007        | 0(0-Inf)               |
| KERATOSIS, PUNCTATA                                                    | 0                                       | 0          | 5                                          | 1.856         | 0(0-Inf)               |
| KERATOSIS, SEBORRHEIC, BREAST                                          | 0                                       | 0          | 14                                         | 6.763         | 0(0-Inf)               |
| KERATOSIS, SEBORRHEIC, GENITAL, NEC, CODE ALSO NEOPLASM BENIGN BY SITE | 0                                       | 0          | 1                                          | 0.4048        | 0(0-Inf)               |
| KERATOSIS, SEBORRHEIC, NOS-SKER                                        | 258                                     | 2558.546   | 6679                                       | 2588.2051     | 0.9885(0.8726-1.1198)  |
| KERATOSIS, SEBORRHEIC, SCROTUM                                         | 0                                       | 0          | 1                                          | 0.3526        | 0(0-Inf)               |
| KERATOSIS, SENILE                                                      | 2                                       | 14.4258    | 27                                         | 7.7994        | 1.8496(0.4367-7.8332)  |
| KERATOSIS, SOLAR                                                       | 26                                      | 205.2312   | 529                                        | 177.9197      | 1.1535(0.7771-1.7122)  |
| KERATOSIS, VERRUICAL                                                   | 48                                      | 364.2346   | 1081                                       | 329.0327      | 1.107(0.8283-1.4794)   |
| KERATOUVEITIS (HERPES ZOSTER)                                          | 1                                       | 14.6711    | 7                                          | 6.29          | 2.3324(0.2843-19.1379) |
| KETO-ACIDOSIS, DIABETIC, DUE TO KIDNEY TRANSPLANT                      | 0                                       | 0          | 1                                          | 0.4751        | 0(0-Inf)               |
| KETO-ACIDOSIS, DIABETIC, NOS                                           | 0                                       | 0          | 21                                         | 6.0889        | 0(0-Inf)               |
| KETO-ACIDOSIS, NOS                                                     | 0                                       | 0          | 9                                          | 2.293         | 0(0-Inf)               |
| KETONURIA                                                              | 0                                       | 0          | 1                                          | 0.4048        | 0(0-Inf)               |
| KINK, ARTERY                                                           | 0                                       | 0          | 1                                          | 0.2354        | 0(0-Inf)               |
| KINK, CAROTID                                                          | 0                                       | 0          | 3                                          | 1.5756        | 0(0-Inf)               |
| KINK, INTESTINAL, SEE ALSO OBSTRUCTION BY SITE                         | 0                                       | 0          | 3                                          | 1.2105        | 0(0-Inf)               |
| KINK, URETER, CONGENITAL                                               | 0                                       | 0          | 1                                          | 0.234         | 0(0-Inf)               |
| KISSING PUNCTA                                                         | 0                                       | 0          | 1                                          | 0.3526        | 0(0-Inf)               |
| KNOCK KNEE, NOS                                                        | 0                                       | 0          | 2                                          | 0.591         | 0(0-Inf)               |
| KNUCKLE PADS (SEE ALSO FIBROMATOSIS)                                   | 0                                       | 0          | 1                                          | 0.2354        | 0(0-Inf)               |
| KOEBNERIZATION                                                         | 0                                       | 0          | 1                                          | 0.2354        | 0(0-Inf)               |
| KOILOCYTOSIS GENITAL FEMALE                                            | 0                                       | 0          | 8                                          | 2.1874        | 0(0-Inf)               |
| KOILONYCHIA                                                            | 1                                       | 9.1899     | 3                                          | 1.3166        | 6.9802(0.706-69.0118)  |
| KRAUROSIS, VULVAE                                                      | 0                                       | 0          | 8                                          | 1.8734        | 0(0-Inf)               |
| KYPHOSCOLIOSIS, CERVICAL                                               | 0                                       | 0          | 6                                          | 3.627         | 0(0-Inf)               |
| KYPHOSCOLIOSIS, CONGENITAL                                             | 0                                       | 0          | 1                                          | 0.2729        | 0(0-Inf)               |
| KYPHOSCOLIOSIS, DORSAL                                                 | 0                                       | 0          | 7                                          | 2.3483        | 0(0-Inf)               |
| KYPHOSCOLIOSIS, NOS, SEE ALSO KYPHOSIS                                 | 6                                       | 58.6449    | 121                                        | 59.2392       | 0.99(0.435-2.2528)     |
| KYPHOSCOLIOSIS, PARALYTIC                                              | 0                                       | 0          | 1                                          | 0.398         | 0(0-Inf)               |
| KYPHOSCOLIOSIS, THORACIC                                               | 0                                       | 0          | 20                                         | 5.4184        | 0(0-Inf)               |
| KYPHOSIS, CONGENITAL                                                   | 0                                       | 0          | 1                                          | 0.3526        | 0(0-Inf)               |
| KYPHOSIS, DORSAL                                                       | 1                                       | 7.8426     | 58                                         | 19.6818       | 0.3985(0.055-2.885)    |

| Description                                                            | No. of Positive Cases with Disease Code | Case Rate* | No. of Positive Controls with Disease Code | Control Rate* | Relative Risk (95%CI)  |
|------------------------------------------------------------------------|-----------------------------------------|------------|--------------------------------------------|---------------|------------------------|
| KYPHOSIS, NOS, SEE ALSO KYPHOSCOLIOSIS                                 | 7                                       | 61.8811    | 198                                        | 82.0965       | 0.7538(0.3541-1.6047)  |
| KYPHOSIS, POST-TRAUMATIC                                               | 0                                       | 0          | 1                                          | 0.3526        | 0(0-Inf)               |
| KYPHOSIS, THORACIC                                                     | 4                                       | 36.4877    | 109                                        | 47.6818       | 0.7652(0.2815-2.0806)  |
| KYPHOSIS, THORACOLUMBAR                                                | 0                                       | 0          | 11                                         | 12.3768       | 0(0-Inf)               |
| KYPHOSIS, WITH RESTRICTIVE LUNG DISEASE                                | 0                                       | 0          | 3                                          | 1.2105        | 0(0-Inf)               |
| LABILE, BLOOD PRESSURE                                                 | 67                                      | 501.1981   | 1915                                       | 531.0244      | 0.9438(0.7393-1.205)   |
| LABILE, EMOTIONS                                                       | 3                                       | 21.0401    | 32                                         | 8.4888        | 2.4786(0.753-8.1586)   |
| LABILE, PERSONALITY                                                    | 0                                       | 0          | 3                                          | 0.741         | 0(0-Inf)               |
| LABILE, VASOMOTOR SYSTEM                                               | 0                                       | 0          | 1                                          | 0.2729        | 0(0-Inf)               |
| LABOR, ARRESTED, ACTIVE PHASE, COMPLICATING DELIVERY (SEE ALSO FAILED) | 0                                       | 0          | 1                                          | 0.398         | 0(0-Inf)               |
| LABOR, PRECIPITATE, WITH DELIVERY                                      | 0                                       | 0          | 1                                          | 0.8276        | 0(0-Inf)               |
| LABOR, PROLONGED, NOS                                                  | 0                                       | 0          | 1                                          | 0.827         | 0(0-Inf)               |
| LABYRINTHITIS, ACUTE                                                   | 2                                       | 14.0656    | 113                                        | 27.0904       | 0.5192(0.128-2.1061)   |
| LABYRINTHITIS, NOS                                                     | 8                                       | 56.0553    | 241                                        | 58.5018       | 0.9582(0.4728-1.9418)  |
| LABYRINTHITIS, P.O.                                                    | 0                                       | 0          | 1                                          | 0.4048        | 0(0-Inf)               |
| LABYRINTHITIS, VIRAL                                                   | 1                                       | 7.3049     | 56                                         | 13.0913       | 0.558(0.077-4.0437)    |
| LACERATION, CEREBRAL                                                   | 0                                       | 0          | 1                                          | 0.3528        | 0(0-Inf)               |
| LACERATION, CERVIX, OLD                                                | 0                                       | 0          | 1                                          | 0.234         | 0(0-Inf)               |
| LACERATION, CERVIX, WITH DELIVERY                                      | 0                                       | 0          | 1                                          | 0.398         | 0(0-Inf)               |
| LACERATION, CHIN                                                       | 1                                       | 8.5291     | 28                                         | 10.9602       | 0.7782(0.1054-5.7457)  |
| LACERATION, EYELID, PERIOCLAR                                          | 0                                       | 0          | 1                                          | 0.398         | 0(0-Inf)               |
| LACERATION, FACE, SEE ALSO WOUND, OPEN BY SITE                         | 9                                       | 65.8285    | 301                                        | 90.2318       | 0.7295(0.3754-1.4178)  |
| LACERATION, FINGERNAIL                                                 | 1                                       | 7.2993     | 29                                         | 9.051         | 0.8065(0.1094-5.9439)  |
| LACERATION, JOINT, SEE ALSO INJURY, JOINT BY SITE                      | 0                                       | 0          | 1                                          | 0.4751        | 0(0-Inf)               |
| LACERATION, LOWER EXTREMITY, SEE ALSO WOUND, OPEN BY SITE              | 0                                       | 0          | 12                                         | 3.5933        | 0(0-Inf)               |
| LACERATION, MUSCLE, CODE ALSO RUPTURE, MUSCLE BY SITE                  | 1                                       | 7.5152     | 8                                          | 2.0447        | 3.6754(0.4531-29.8127) |
| LACERATION, NERVE, SEE ALSO INJURY, NERVE BY SITE                      | 0                                       | 0          | 1                                          | 0.2354        | 0(0-Inf)               |
| LACERATION, PERINEUM                                                   | 0                                       | 0          | 5                                          | 3.066         | 0(0-Inf)               |
| LACERATION, SCALP                                                      | 19                                      | 148.0706   | 536                                        | 177.615       | 0.8337(0.527-1.3188)   |
| LACERATION, TENDON, NOS, CODE ALSO RUPTURE MUSCLE BY SITE              | 0                                       | 0          | 21                                         | 5.5911        | 0(0-Inf)               |
| LACERATION, TOENAIL                                                    | 1                                       | 8.3601     | 6                                          | 2.2712        | 3.681(0.4349-31.1581)  |
| LACERATION, TRUNK, SEE ALSO WOUND, OPEN BY SITE                        | 0                                       | 0          | 1                                          | 0.4751        | 0(0-Inf)               |
| LACERATION, UPPER EXTREMITY, SEE ALSO WOUND, OPEN BY SITE              | 0                                       | 0          | 2                                          | 0.5458        | 0(0-Inf)               |
| LACERATION, VAGINA                                                     | 0                                       | 0          | 4                                          | 0.884         | 0(0-Inf)               |
| LACERATION, VAGINAL, (SULCUS), NOS WITH DELIVERY                       | 0                                       | 0          | 2                                          | 1.6552        | 0(0-Inf)               |
| LACERATION, VULVA                                                      | 0                                       | 0          | 1                                          | 1.9061        | 0(0-Inf)               |



| Description                                   | No. of Positive Cases with Disease Code | Case Rate* | No. of Positive Controls with Disease Code | Control Rate* | Relative Risk (95%CI)   |
|-----------------------------------------------|-----------------------------------------|------------|--------------------------------------------|---------------|-------------------------|
| LACERATION, WITH DELIVERY, NOS                | 0                                       | 0          | 1                                          | 0.398         | 0(0-Inf)                |
| LACERATION, WITH DELIVERY, SECOND DEGREE      | 0                                       | 0          | 2                                          | 1.6555        | 0(0-Inf)                |
| LACTATION, NON-PUERPERAL                      | 0                                       | 0          | 1                                          | 0.8274        | 0(0-Inf)                |
| LACUNAR STATE                                 | 0                                       | 0          | 8                                          | 5.3889        | 0(0-Inf)                |
| LAG (EYELID)                                  | 0                                       | 0          | 4                                          | 1.17          | 0(0-Inf)                |
| LAGOPHTHALMOS, NOS                            | 3                                       | 24.5994    | 82                                         | 29.9006       | 0.8227(0.2592-2.6114)   |
| LAGOPHTHALMOS, PARALYTIC                      | 0                                       | 0          | 1                                          | 0.2354        | 0(0-Inf)                |
| LAMBLIASIS                                    | 0                                       | 0          | 2                                          | 0.8724        | 0(0-Inf)                |
| LARGE, BLADDER CAPACITY                       | 3                                       | 26.3032    | 58                                         | 23.8624       | 1.1023(0.3442-3.5301)   |
| LARGE, HEAD                                   | 0                                       | 0          | 1                                          | 0.3526        | 0(0-Inf)                |
| LARGE, OPTIC DISC                             | 0                                       | 0          | 43                                         | 24.5926       | 0(0-Inf)                |
| LARYNGITIS, ACUTE                             | 1                                       | 7.3548     | 43                                         | 9.976         | 0.7372(0.1011-5.3759)   |
| LARYNGITIS, BACTERIAL                         | 0                                       | 0          | 3                                          | 0.8458        | 0(0-Inf)                |
| LARYNGITIS, CHRONIC                           | 3                                       | 20.7776    | 30                                         | 7.7837        | 2.6694(0.8086-8.8121)   |
| LARYNGITIS, IRRITATIVE                        | 0                                       | 0          | 2                                          | 0.8723        | 0(0-Inf)                |
| LARYNGITIS, NOS                               | 13                                      | 92.2241    | 438                                        | 104.6038      | 0.8817(0.5071-1.5328)   |
| LARYNGITIS, SICCA                             | 0                                       | 0          | 1                                          | 0.8879        | 0(0-Inf)                |
| LARYNGITIS, SMOKER'S                          | 0                                       | 0          | 6                                          | 1.6173        | 0(0-Inf)                |
| LARYNGITIS, SUBACUTE                          | 1                                       | 62.1041    | 0                                          | 0             | 727246735515.108(0-Inf) |
| LARYNGITIS, TRAUMATIC                         | 0                                       | 0          | 1                                          | 0.8528        | 0(0-Inf)                |
| LARYNGITIS, VIRAL                             | 2                                       | 14.9823    | 87                                         | 20.2101       | 0.7413(0.182-3.0203)    |
| LARYNGITIS, WITH BRONCHITIS                   | 0                                       | 0          | 9                                          | 2.0011        | 0(0-Inf)                |
| LARYNGITIS, WITH TRACHEITIS                   | 0                                       | 0          | 9                                          | 2.1183        | 0(0-Inf)                |
| LARYNGOCELE                                   | 1                                       | 11.6906    | 0                                          | 0             | 8839829068.9664(0-Inf)  |
| LARYNGOPHARYNGITIS (ACUTE)                    | 0                                       | 0          | 7                                          | 2.5619        | 0(0-Inf)                |
| LARYNGOSPASM, ACUTE                           | 1                                       | 7.2032     | 5                                          | 1.202         | 5.9927(0.6825-52.6216)  |
| LARYNGOSPASM, NOS                             | 0                                       | 0          | 31                                         | 9.01          | 0(0-Inf)                |
| LARYNGOTRACHEITIS, INFECTIOUS, ACUTE          | 0                                       | 0          | 7                                          | 1.8335        | 0(0-Inf)                |
| LARYNGOTRACHEOBRONCHITIS, ACUTE               | 0                                       | 0          | 1                                          | 0.2354        | 0(0-Inf)                |
| LARYNGOTRACHEOBRONCHITIS, NOS--LTB            | 0                                       | 0          | 29                                         | 6.5439        | 0(0-Inf)                |
| LARYNGOTRACHEOBRONCHITIS, VIRAL               | 0                                       | 0          | 9                                          | 2.0963        | 0(0-Inf)                |
| LASSITUDE                                     | 0                                       | 0          | 1                                          | 0.2729        | 0(0-Inf)                |
| LAXITY, ABDOMINAL WALL                        | 0                                       | 0          | 2                                          | 0.5909        | 0(0-Inf)                |
| LAXITY, CONNECTIVE TISSUE                     | 0                                       | 0          | 10                                         | 3.0853        | 0(0-Inf)                |
| LAXITY, JOINT                                 | 1                                       | 7.8725     | 30                                         | 7.2989        | 1.0786(0.1463-7.9518)   |
| LAXITY, VOCAL CORD                            | 0                                       | 0          | 8                                          | 3.4102        | 0(0-Inf)                |
| LEAK, AIR (PERSISTENT), SEE ALSO PNEUMOTHORAX | 0                                       | 0          | 5                                          | 1.486         | 0(0-Inf)                |
| LEAK, BILE (POST OP)                          | 2                                       | 14.9418    | 8                                          | 2.5219        | 5.9248(1.2356-28.4112)  |
| LEAK, BILE, NOS                               | 0                                       | 0          | 3                                          | 1.1478        | 0(0-Inf)                |
| LEAK, CEREBROSPINAL FLUID                     | 0                                       | 0          | 6                                          | 2.369         | 0(0-Inf)                |

| Description                                                              | No. of Positive Cases with Disease Code | Case Rate* | No. of Positive Controls with Disease Code | Control Rate* | Relative Risk (95%CI)  |
|--------------------------------------------------------------------------|-----------------------------------------|------------|--------------------------------------------|---------------|------------------------|
| LEAK, CHYLE (POST OP)                                                    | 0                                       | 0          | 1                                          | 0.3526        | 0(0-Inf)               |
| LEAK, LYMPHATIC, POST-SURGICAL (LYMPHORRHEA)                             | 0                                       | 0          | 10                                         | 5.032         | 0(0-Inf)               |
| LEAKING PROSTHESIS (HEART VALVE)--CODE ALSO STATUS                       | 1                                       | 10.6452    | 13                                         | 7.1218        | 1.4947(0.194-11.515)   |
| LEFT, AGAINST MEDICAL ADVICE--AMA                                        | 1                                       | 7.1892     | 40                                         | 11.7218       | 0.6133(0.084-4.4769)   |
| LEIOMYOFIBROMA NOS CODE ALSO NEOPLASM BENIGN BY SITE                     | 0                                       | 0          | 1                                          | 0.398         | 0(0-Inf)               |
| LEIOMYOMA, MALIGNANT, CODE ALSO NEOPLASM, MALIGNANT BY SITE              | 0                                       | 0          | 1                                          | 0.4751        | 0(0-Inf)               |
| LEIOMYOMA, NOS, CODE ALSO NEOPLASM, BENIGN BY SITE                       | 4                                       | 30.1048    | 130                                        | 28.9849       | 1.0386(0.3829-2.8172)  |
| LEIOMYOMA, SKIN, NOS                                                     | 0                                       | 0          | 4                                          | 1.0527        | 0(0-Inf)               |
| LEIOMYOMA, UTERUS                                                        | 20                                      | 502.8966   | 811                                        | 449.9325      | 1.1177(0.7166-1.7434)  |
| LEIOMYOMA, VASCULAR, CODE ALSO HEMANGIOMA BY SITE                        | 0                                       | 0          | 4                                          | 0.942         | 0(0-Inf)               |
| LEIOMYOSARCOMA CODE ALSO NEOPLASM MALIGNANT BY SITE                      | 0                                       | 0          | 11                                         | 3.2666        | 0(0-Inf)               |
| LENTIGINES-SEE ALSO LENTIGO                                              | 30                                      | 235.7122   | 670                                        | 223.048       | 1.0568(0.7322-1.5253)  |
| LENTIGO, MALIGNA, NOS (CODE MALIGNANT MELANOMA ONLY IF STATED MALIGNANT) | 3                                       | 29.128     | 70                                         | 33.5409       | 0.8684(0.2727-2.7655)  |
| LENTIGO, MALIGNANT, SEE ALSO MELANOMA                                    | 0                                       | 0          | 3                                          | 0.8018        | 0(0-Inf)               |
| LENTIGO, NOS                                                             | 68                                      | 522.7031   | 1480                                       | 446.3218      | 1.1711(0.9177-1.4946)  |
| LESION, ALVEOLAR                                                         | 4                                       | 30.1741    | 121                                        | 28.0155       | 1.077(0.3966-2.9248)   |
| LESION, ANORECTAL                                                        | 1                                       | 8.4965     | 21                                         | 8.2504        | 1.0298(0.1378-7.6989)  |
| LESION, AORTIC VALVULAR, SEE ALSO DISEASE                                | 0                                       | 0          | 3                                          | 1.2146        | 0(0-Inf)               |
| LESION, BANKART                                                          | 0                                       | 0          | 4                                          | 2.4136        | 0(0-Inf)               |
| LESION, BASAL GANGLION                                                   | 0                                       | 0          | 2                                          | 1.7057        | 0(0-Inf)               |
| LESION, BILE DUCT                                                        | 1                                       | 14.3112    | 2                                          | 1.7047        | 8.3952(0.7428-94.8849) |
| LESION, BLADDER                                                          | 14                                      | 166.624    | 232                                        | 146.1639      | 1.14(0.6638-1.9577)    |
| LESION, BONE                                                             | 6                                       | 46.0433    | 87                                         | 28.4669       | 1.6174(0.7045-3.7135)  |
| LESION, BRAIN                                                            | 8                                       | 62.8179    | 113                                        | 38.5139       | 1.631(0.7937-3.352)    |
| LESION, BREAST                                                           | 0                                       | 0          | 83                                         | 25.2013       | 0(0-Inf)               |
| LESION, BUCCAL                                                           | 2                                       | 14.2154    | 63                                         | 17.2945       | 0.822(0.2004-3.3713)   |
| LESION, CAMERON                                                          | 2                                       | 19.6722    | 40                                         | 19.5176       | 1.0079(0.2426-4.1877)  |
| LESION, CANTHUS                                                          | 0                                       | 0          | 16                                         | 5.5689        | 0(0-Inf)               |
| LESION, CAUDA EQUINA                                                     | 0                                       | 0          | 2                                          | 0.591         | 0(0-Inf)               |
| LESION, CEREBROVASCULAR                                                  | 0                                       | 0          | 1                                          | 2.4861        | 0(0-Inf)               |
| LESION, CERVIX                                                           | 0                                       | 0          | 31                                         | 13.4306       | 0(0-Inf)               |
| LESION, CHIASMAL                                                         | 0                                       | 0          | 1                                          | 2.4857        | 0(0-Inf)               |
| LESION, CNS                                                              | 1                                       | 12.3023    | 3                                          | 2.002         | 6.145(0.6265-60.271)   |
| LESION, CORD, CERVICAL                                                   | 0                                       | 0          | 7                                          | 1.6868        | 0(0-Inf)               |
| LESION, CORD, INTRASPINAL                                                | 0                                       | 0          | 1                                          | 0.4751        | 0(0-Inf)               |
| LESION, CORD, SPINAL                                                     | 0                                       | 0          | 11                                         | 3.2669        | 0(0-Inf)               |
| LESION, CORD, TRAUMATIC, CERVICAL                                        | 0                                       | 0          | 1                                          | 0.2354        | 0(0-Inf)               |
| LESION, CORD, TRAUMATIC, LATE EFFECT (ANY PART)                          | 0                                       | 0          | 1                                          | 0.4751        | 0(0-Inf)               |

| Description                                     | No. of Positive Cases with Disease Code | Case Rate* | No. of Positive Controls with Disease Code | Control Rate* | Relative Risk (95%CI)    |
|-------------------------------------------------|-----------------------------------------|------------|--------------------------------------------|---------------|--------------------------|
| LESION, CORD, TRAUMATIC, THORACIC               | 0                                       | 0          | 1                                          | 0.2729        | 0(0-Inf)                 |
| LESION, CYSTIC, (DERM)--SEE ALSO CYST BY SITE   | 1                                       | 8.5386     | 9                                          | 3.5687        | 2.3926(0.2997-19.1027)   |
| LESION, DUODENUM                                | 1                                       | 11.0767    | 38                                         | 21.9867       | 0.5038(0.069-3.6789)     |
| LESION, EAR                                     | 5                                       | 56.0864    | 136                                        | 80.1968       | 0.6994(0.286-1.71)       |
| LESION, ESOPHAGUS                               | 2                                       | 20.4257    | 60                                         | 30.8938       | 0.6612(0.1612-2.7116)    |
| LESION, EYELID                                  | 9                                       | 69.3129    | 242                                        | 78.869        | 0.8788(0.451-1.7125)     |
| LESION, GASTROINTESTINAL, NOS                   | 6                                       | 62         | 137                                        | 71.6702       | 0.8651(0.3812-1.963)     |
| LESION, GINGIVA                                 | 0                                       | 0          | 11                                         | 3.1099        | 0(0-Inf)                 |
| LESION, GUM                                     | 1                                       | 8.9516     | 5                                          | 2.1144        | 4.2336(0.4848-36.9711)   |
| LESION, HELIX, EAR                              | 0                                       | 0          | 7                                          | 2.1277        | 0(0-Inf)                 |
| LESION, HILL-SACHS                              | 0                                       | 0          | 7                                          | 1.8467        | 0(0-Inf)                 |
| LESION, HYPERKERATOTIC, SEE ALSO HYPERKERATOSIS | 2                                       | 19.1028    | 46                                         | 21.5993       | 0.8844(0.2139-3.6571)    |
| LESION, KERATOTIC, SEE ALSO KERATOSIS           | 0                                       | 0          | 30                                         | 17.3387       | 0(0-Inf)                 |
| LESION, LIP                                     | 11                                      | 84.6801    | 231                                        | 75.5139       | 1.1214(0.6112-2.0574)    |
| LESION, LIVER                                   | 3                                       | 26.7036    | 89                                         | 37.2084       | 0.7177(0.2266-2.2731)    |
| LESION, LUNG, NOS                               | 3                                       | 28.5083    | 64                                         | 29.6518       | 0.9614(0.3011-3.07)      |
| LESION, MAXILLARY SINUS                         | 0                                       | 0          | 5                                          | 3.9061        | 0(0-Inf)                 |
| LESION, MITRAL VALVE, RHEUMATIC                 | 0                                       | 0          | 1                                          | 0.4751        | 0(0-Inf)                 |
| LESION, MOTOR NEURON                            | 0                                       | 0          | 2                                          | 0.5709        | 0(0-Inf)                 |
| LESION, MOUTH                                   | 5                                       | 46.0122    | 156                                        | 68.6973       | 0.6698(0.2744-1.6347)    |
| LESION, NEC, SEE ALSO DISEASE                   | 0                                       | 0          | 4                                          | 1.9296        | 0(0-Inf)                 |
| LESION, NERVE, CERVICAL                         | 0                                       | 0          | 1                                          | 0.2729        | 0(0-Inf)                 |
| LESION, NERVE, CRANIAL, SEVENTH                 | 0                                       | 0          | 2                                          | 0.7052        | 0(0-Inf)                 |
| LESION, NERVE, CRANIAL, SIXTH                   | 0                                       | 0          | 1                                          | 0.8877        | 0(0-Inf)                 |
| LESION, NERVE, CRANIAL, THIRD                   | 0                                       | 0          | 1                                          | 0.2354        | 0(0-Inf)                 |
| LESION, NERVE, FEMORAL                          | 1                                       | 9.2151     | 1                                          | 0.4527        | 20.3575(1.2312-336.6192) |
| LESION, NERVE, HYPOGLOSSAL, TWELFTH CRANIAL     | 0                                       | 0          | 2                                          | 0.5709        | 0(0-Inf)                 |
| LESION, NERVE, MEDIAN                           | 0                                       | 0          | 1                                          | 0.3527        | 0(0-Inf)                 |
| LESION, NERVE, NOS, SEE ALSO NEUROPATHY         | 0                                       | 0          | 1                                          | 0.3526        | 0(0-Inf)                 |
| LESION, NERVE, SCIATIC                          | 0                                       | 0          | 2                                          | 0.4853        | 0(0-Inf)                 |
| LESION, NERVE, THORACIC                         | 0                                       | 0          | 1                                          | 0.2354        | 0(0-Inf)                 |
| LESION, NERVE, TRIGEMINAL, FIFTH CRANIAL        | 0                                       | 0          | 1                                          | 0.234         | 0(0-Inf)                 |
| LESION, NERVE, ULNAR                            | 0                                       | 0          | 3                                          | 0.8018        | 0(0-Inf)                 |
| LESION, NOSE                                    | 8                                       | 68.0387    | 210                                        | 81.4839       | 0.835(0.4114-1.6947)     |
| LESION, PENIS                                   | 1                                       | 17.7104    | 63                                         | 54.1332       | 0.3272(0.0453-2.3622)    |
| LESION, PERIAPICAL                              | 5                                       | 38.3732    | 193                                        | 62.8069       | 0.611(0.251-1.487)       |
| LESION, PHARYNGEAL                              | 0                                       | 0          | 13                                         | 5.4821        | 0(0-Inf)                 |
| LESION, PIGMENTED (SKIN#)                       | 3                                       | 23.8308    | 139                                        | 48.6287       | 0.4901(0.1559-1.5402)    |
| LESION, POLYPOID, SEE ALSO POLYP                | 0                                       | 0          | 5                                          | 1.2694        | 0(0-Inf)                 |
| LESION, PULMONARY                               | 3                                       | 20.8966    | 56                                         | 13.8666       | 1.507(0.4693-4.8386)     |

| Description                                         | No. of Positive Cases with Disease Code | Case Rate* | No. of Positive Controls with Disease Code | Control Rate* | Relative Risk (95%CI)    |
|-----------------------------------------------------|-----------------------------------------|------------|--------------------------------------------|---------------|--------------------------|
| LESION, RENAL                                       | 3                                       | 21.5682    | 34                                         | 9.6805        | 2.228(0.6792-7.3081)     |
| LESION, RETINA                                      | 0                                       | 0          | 10                                         | 4.359         | 0(0-Inf)                 |
| LESION, ROOT, CERVICAL                              | 1                                       | 8.502      | 9                                          | 2.3779        | 3.5754(0.4467-28.6151)   |
| LESION, ROOT, LUMBAR                                | 0                                       | 0          | 9                                          | 2.1903        | 0(0-Inf)                 |
| LESION, ROOT, LUMBAR NERVE                          | 0                                       | 0          | 1                                          | 0.2354        | 0(0-Inf)                 |
| LESION, ROOT, LUMBAR PLEXUS                         | 0                                       | 0          | 1                                          | 2.4862        | 0(0-Inf)                 |
| LESION, ROOT, NOS                                   | 0                                       | 0          | 1                                          | 0.4751        | 0(0-Inf)                 |
| LESION, ROOT, SACRAL                                | 0                                       | 0          | 2                                          | 0.9507        | 0(0-Inf)                 |
| LESION, SACROILIAC                                  | 0                                       | 0          | 2                                          | 0.5069        | 0(0-Inf)                 |
| LESION, SALIVARY GLAND OR DUCT, NEC                 | 0                                       | 0          | 21                                         | 5.1737        | 0(0-Inf)                 |
| LESION, SKIN                                        | 119                                     | 1079.665   | 3684                                       | 1531.9572     | 0.7048(0.5869-0.8463)    |
| LESION, SKIN, DYSCHROMIC                            | 1                                       | 7.1205     | 1                                          | 0.2189        | 32.5223(1.8945-558.3051) |
| LESION, SPINAL CORD, SEE LESION, CORD               | 0                                       | 0          | 12                                         | 4.3265        | 0(0-Inf)                 |
| LESION, SPLEEN                                      | 0                                       | 0          | 2                                          | 1.0784        | 0(0-Inf)                 |
| LESION, STOMACH                                     | 4                                       | 39.5817    | 98                                         | 48.2883       | 0.8197(0.3009-2.233)     |
| LESION, TONGUE                                      | 6                                       | 53.1351    | 114                                        | 47.3435       | 1.1223(0.4925-2.5576)    |
| LESION, TONSIL                                      | 1                                       | 7.4569     | 24                                         | 7.4114        | 1.0061(0.1353-7.4833)    |
| LESION, UTERUS, NOS                                 | 0                                       | 0          | 3                                          | 0.7063        | 0(0-Inf)                 |
| LESION, VAGINA (PIGMENTED)                          | 0                                       | 0          | 54                                         | 29.0125       | 0(0-Inf)                 |
| LESION, VASCULAR                                    | 0                                       | 0          | 25                                         | 8.6311        | 0(0-Inf)                 |
| LETHARGY                                            | 20                                      | 327.1974   | 279                                        | 282.6479      | 1.1576(0.7346-1.8241)    |
| LEUKEMIA, ACUTE, NOS                                | 0                                       | 0          | 14                                         | 7.7958        | 0(0-Inf)                 |
| LEUKEMIA, B-CELL, ACUTE                             | 1                                       | 11.2682    | 0                                          | 0             | 7476760533.8997(0-Inf)   |
| LEUKEMIA, B-CELL, CHRONIC                           | 1                                       | 12.2531    | 17                                         | 11.2843       | 1.0859(0.1438-8.1995)    |
| LEUKEMIA, B-CELL, IN REMISSION                      | 0                                       | 0          | 2                                          | 0.4853        | 0(0-Inf)                 |
| LEUKEMIA, B-CELL, NOS                               | 3                                       | 29.6261    | 53                                         | 26.0051       | 1.1392(0.3548-3.6579)    |
| LEUKEMIA, CHRONIC, NOS                              | 0                                       | 0          | 6                                          | 4.8676        | 0(0-Inf)                 |
| LEUKEMIA, CNS                                       | 0                                       | 0          | 1                                          | 0.8877        | 0(0-Inf)                 |
| LEUKEMIA, CUTIS                                     | 0                                       | 0          | 2                                          | 0.7896        | 0(0-Inf)                 |
| LEUKEMIA, GRANULOCYTIC/GRANULAR CELL, NOS, SEE ALSO |                                         |            |                                            |               |                          |
| LEUKEMIA, MYELOCYTIC                                | 0                                       | 0          | 6                                          | 4.8021        | 0(0-Inf)                 |
| LEUKEMIA, HAIRY CELL                                | 1                                       | 8.6386     | 9                                          | 3.6905        | 2.3408(0.2936-18.6606)   |
| LEUKEMIA, HAIRY CELL, IN REMISSION                  | 1                                       | 6.9491     | 4                                          | 1.1098        | 6.2618(0.6837-57.3528)   |
| LEUKEMIA, LYMPHOBLASTIC, ACUTE                      | 0                                       | 0          | 4                                          | 1.7187        | 0(0-Inf)                 |
| LEUKEMIA, LYMPHOBLASTIC, CHRONIC                    | 0                                       | 0          | 1                                          | 0.4048        | 0(0-Inf)                 |
| LEUKEMIA, LYMPHOBLASTIC, IN REMISSION               | 0                                       | 0          | 2                                          | 0.7052        | 0(0-Inf)                 |
| LEUKEMIA, LYMPHOCYTIC, ACUTE                        | 0                                       | 0          | 6                                          | 1.8808        | 0(0-Inf)                 |
| LEUKEMIA, LYMPHOCYTIC, CHRONIC                      | 6                                       | 53.5866    | 115                                        | 48.4359       | 1.1063(0.4857-2.5202)    |
| LEUKEMIA, LYMPHOCYTIC, IN REMISSION                 | 2                                       | 16.089     | 14                                         | 4.9959        | 3.2204(0.7236-14.3325)   |
| LEUKEMIA, LYMPHOCYTIC, NOS                          | 0                                       | 0          | 8                                          | 5.2871        | 0(0-Inf)                 |

| Description                                                 | No. of Positive Cases with Disease Code | Case Rate* | No. of Positive Controls with Disease Code | Control Rate* | Relative Risk (95%CI)   |
|-------------------------------------------------------------|-----------------------------------------|------------|--------------------------------------------|---------------|-------------------------|
| LEUKEMIA, MONOCYTIC, ACUTE                                  | 0                                       | 0          | 1                                          | 0.234         | 0(0-Inf)                |
| LEUKEMIA, MONOCYTIC, CHRONIC                                | 0                                       | 0          | 6                                          | 4.096         | 0(0-Inf)                |
| LEUKEMIA, MONOMYELOCYTIC, NOS, SEE ALSO LEUKEMIA, MONOCYTIC | 0                                       | 0          | 1                                          | 2.4857        | 0(0-Inf)                |
| LEUKEMIA, MYELOCYTIC, ACUTE                                 | 1                                       | 10.9766    | 29                                         | 16.5886       | 0.6617(0.0898-4.8746)   |
| LEUKEMIA, MYELOCYTIC, CHRONIC                               | 0                                       | 0          | 22                                         | 10.3445       | 0(0-Inf)                |
| LEUKEMIA, MYELOCYTIC, IN REMISSION                          | 0                                       | 0          | 5                                          | 1.265         | 0(0-Inf)                |
| LEUKEMIA, MYELOGENOUS, NOS, SEE ALSO LEUKEMIA, MYELOCYTIC   | 0                                       | 0          | 2                                          | 0.5708        | 0(0-Inf)                |
| LEUKEMIA, NOS                                               | 4                                       | 54.8105    | 22                                         | 17.1525       | 3.1955(1.0942-9.3319)   |
| LEUKEMIA, NOS, IN REMISSION (NO EVIDENCE OF DISEASE)        | 0                                       | 0          | 2                                          | 0.7896        | 0(0-Inf)                |
| LEUKEMIA, PLASMA CELL, NOS                                  | 1                                       | 6.8765     | 0                                          | 0             | 12220559077.7847(0-Inf) |
| LEUKEMIA, PROLYMPHOCYTIC                                    | 0                                       | 0          | 2                                          | 0.4708        | 0(0-Inf)                |
| LEUKEMIA, RECURRENT                                         | 0                                       | 0          | 3                                          | 1.1478        | 0(0-Inf)                |
| LEUKEMIA, RELAPSE                                           | 0                                       | 0          | 7                                          | 2.094         | 0(0-Inf)                |
| LEUKEMIA, T-CELL, IN REMISSION                              | 0                                       | 0          | 1                                          | 0.2354        | 0(0-Inf)                |
| LEUKEMIA, T-CELL, NOS                                       | 0                                       | 0          | 5                                          | 2.7669        | 0(0-Inf)                |
| LEUKOAREOSIS                                                | 0                                       | 0          | 6                                          | 4.1284        | 0(0-Inf)                |
| LEUKOCYTOSIS, NOS                                           | 11                                      | 134.101    | 327                                        | 219.2453      | 0.6116(0.3351-1.1165)   |
| LEUKODERMA                                                  | 0                                       | 0          | 1                                          | 0.8877        | 0(0-Inf)                |
| LEUKODYSTROPHY, NOS                                         | 0                                       | 0          | 2                                          | 0.8097        | 0(0-Inf)                |
| LEUKOEDEMA (ORAL)                                           | 0                                       | 0          | 1                                          | 0.8877        | 0(0-Inf)                |
| LEUKOENCEPHALOPATHY, NOS                                    | 0                                       | 0          | 8                                          | 3.539         | 0(0-Inf)                |
| LEUKOERYTHROBLASTOSIS                                       | 1                                       | 8.3759     | 5                                          | 1.8958        | 4.4181(0.5046-38.682)   |
| LEUKOKERATOSIS, NOS                                         | 0                                       | 0          | 5                                          | 1.2296        | 0(0-Inf)                |
| LEUKOKERATOSIS, TONGUE                                      | 0                                       | 0          | 1                                          | 0.2729        | 0(0-Inf)                |
| LEUKOKORIA                                                  | 0                                       | 0          | 1                                          | 0.8528        | 0(0-Inf)                |
| LEUKOMA, CORNEAL                                            | 0                                       | 0          | 1                                          | 0.234         | 0(0-Inf)                |
| LEUKOMA, NOS                                                | 0                                       | 0          | 1                                          | 0.8877        | 0(0-Inf)                |
| LEUKOPENIA, NOS                                             | 12                                      | 83.9662    | 177                                        | 45.8976       | 1.8294(1.0164-3.2929)   |
| LEUKOPENIA, TOXIC, DRUG-INDUCED, ETC.                       | 0                                       | 0          | 6                                          | 1.4351        | 0(0-Inf)                |
| LEUKOPLAKIA, ANORECTAL                                      | 0                                       | 0          | 1                                          | 0.8879        | 0(0-Inf)                |
| LEUKOPLAKIA, BLADDER                                        | 0                                       | 0          | 2                                          | 0.7896        | 0(0-Inf)                |
| LEUKOPLAKIA, BUCCAL                                         | 1                                       | 7.0666     | 31                                         | 8.7064        | 0.8117(0.1103-5.9728)   |
| LEUKOPLAKIA, CERVIX                                         | 0                                       | 0          | 4                                          | 0.8814        | 0(0-Inf)                |
| LEUKOPLAKIA, DENTAL, NOS                                    | 0                                       | 0          | 2                                          | 1.1971        | 0(0-Inf)                |
| LEUKOPLAKIA, GINGIVA                                        | 0                                       | 0          | 11                                         | 2.9255        | 0(0-Inf)                |
| LEUKOPLAKIA, GUM                                            | 0                                       | 0          | 6                                          | 1.5424        | 0(0-Inf)                |
| LEUKOPLAKIA, KIDNEY                                         | 0                                       | 0          | 1                                          | 0.3526        | 0(0-Inf)                |
| LEUKOPLAKIA, LABIA                                          | 0                                       | 0          | 4                                          | 1.1677        | 0(0-Inf)                |

| Description                                                  | No. of Positive Cases with Disease Code | Case Rate* | No. of Positive Controls with Disease Code | Control Rate* | Relative Risk (95%CI)    |
|--------------------------------------------------------------|-----------------------------------------|------------|--------------------------------------------|---------------|--------------------------|
| LEUKOPLAKIA, LARYNX                                          | 1                                       | 7.5945     | 4                                          | 0.9428        | 8.0556(0.8723-74.3897)   |
| LEUKOPLAKIA, LIP                                             | 2                                       | 14.075     | 39                                         | 11.3049       | 1.245(0.2994-5.1775)     |
| LEUKOPLAKIA, MOUTH                                           | 2                                       | 16.3866    | 26                                         | 9.5085        | 1.7234(0.4063-7.3103)    |
| LEUKOPLAKIA, NOS                                             | 0                                       | 0          | 65                                         | 22.4987       | 0(0-Inf)                 |
| LEUKOPLAKIA, ORAL                                            | 0                                       | 0          | 19                                         | 5.3831        | 0(0-Inf)                 |
| LEUKOPLAKIA, PALATE                                          | 0                                       | 0          | 9                                          | 2.6552        | 0(0-Inf)                 |
| LEUKOPLAKIA, RECTUM                                          | 0                                       | 0          | 1                                          | 0.8883        | 0(0-Inf)                 |
| LEUKOPLAKIA, TONGUE                                          | 1                                       | 7.892      | 26                                         | 8.9476        | 0.882(0.1191-6.5346)     |
| LEUKOPLAKIA, VAGINA                                          | 0                                       | 0          | 7                                          | 1.576         | 0(0-Inf)                 |
| LEUKOPLAKIA, VOCAL CORD                                      | 2                                       | 13.8178    | 41                                         | 10.9084       | 1.2667(0.3052-5.2581)    |
| LEUKOPLAKIA, VULVA                                           | 1                                       | 13.8198    | 13                                         | 6.0451        | 2.2861(0.2949-17.7218)   |
| LEUKORRHEA, NOS                                              | 2                                       | 63.2221    | 31                                         | 19.2185       | 3.2896(0.7833-13.8156)   |
| LEUKOSTASIS                                                  | 0                                       | 0          | 3                                          | 1.1479        | 0(0-Inf)                 |
| LICHEN, MYXEDEMATOUS                                         | 0                                       | 0          | 1                                          | 0.3526        | 0(0-Inf)                 |
| LICHEN, NOS                                                  | 2                                       | 13.9051    | 26                                         | 6.6861        | 2.0797(0.4896-8.8336)    |
| LICHEN, PLANOPILARIS                                         | 0                                       | 0          | 5                                          | 1.1413        | 0(0-Inf)                 |
| LICHEN, PLANUS                                               | 11                                      | 78.3675    | 258                                        | 61.3193       | 1.278(0.6974-2.3421)     |
| LICHEN, PLANUS LIKE KERATOSIS                                | 0                                       | 0          | 4                                          | 1.1699        | 0(0-Inf)                 |
| LICHEN, SCLEROSUS                                            | 3                                       | 21.5466    | 178                                        | 49.8263       | 0.4324(0.1379-1.356)     |
| LICHEN, SCLEROSUS ET ATROPHICUS                              | 8                                       | 56.2432    | 200                                        | 50.247        | 1.1193(0.5507-2.2752)    |
| LICHEN, SIMPLEX CHRONICUS                                    | 14                                      | 98.6755    | 282                                        | 71.9982       | 1.3705(0.7997-2.3488)    |
| LICHEN, URTICATUS                                            | 0                                       | 0          | 1                                          | 0.4751        | 0(0-Inf)                 |
| LICHENIFICATION                                              | 1                                       | 7.4525     | 21                                         | 4.8662        | 1.5315(0.2043-11.4789)   |
| LIGHTHEADEDNESS (ORTHOSTATIC)                                | 52                                      | 441.7263   | 1011                                       | 381.3001      | 1.1585(0.8758-1.5323)    |
| LIMITATION, MOTION (FLEXIBILITY) SPINE                       | 1                                       | 8.4307     | 26                                         | 10.1089       | 0.834(0.1127-6.1711)     |
| LIMITATION, MOTION IN EXTREMITY                              | 4                                       | 31.4248    | 201                                        | 68.309        | 0.46(0.1707-1.2395)      |
| LIMP                                                         | 0                                       | 0          | 3                                          | 1.5756        | 0(0-Inf)                 |
| LINED ESOPHAGUS (BARRETT'S)                                  | 1                                       | 8.655      | 2                                          | 0.8283        | 10.4492(0.9237-118.2006) |
| LINITIS, PLASTICA                                            | 0                                       | 0          | 2                                          | 0.7896        | 0(0-Inf)                 |
| LIPDEMA                                                      | 2                                       | 13.848     | 34                                         | 8.2592        | 1.6767(0.3998-7.0319)    |
| LIPIDEMIA (SEE ALSO HYPERLIPIDEMIA)                          | 1                                       | 7.1545     | 31                                         | 8.9728        | 0.7973(0.1084-5.866)     |
| LIPIDOSIS, NOS                                               | 0                                       | 0          | 3                                          | 1.511         | 0(0-Inf)                 |
| LIPOTROPHY, NOS                                              | 0                                       | 0          | 2                                          | 0.4709        | 0(0-Inf)                 |
| LIPODYSTROPHY, NOS                                           | 1                                       | 12.4794    | 23                                         | 6.2637        | 1.9923(0.2674-14.8467)   |
| LIPHYPERTROPHY DUE TO INSULIN                                | 0                                       | 0          | 2                                          | 0.5709        | 0(0-Inf)                 |
| LIPOMA, COLON/INTESTINE, CODE ALSO NEO BENIGN BY SITE STATED | 1                                       | 8.1592     | 95                                         | 34.555        | 0.2361(0.0329-1.6961)    |
| LIPOMA, INTRA-ABDOMINAL                                      | 0                                       | 0          | 24                                         | 6.0161        | 0(0-Inf)                 |
| LIPOMA, MALIGNANT, CODE ALSO NEOPLASM, MALIGNANT BY SITE     | 0                                       | 0          | 1                                          | 0.4048        | 0(0-Inf)                 |

| Description                                       | No. of Positive Cases with Disease Code | Case Rate* | No. of Positive Controls with Disease Code | Control Rate* | Relative Risk (95%CI)  |
|---------------------------------------------------|-----------------------------------------|------------|--------------------------------------------|---------------|------------------------|
| LIPOMA, NEC, CODE ALSO NEO BENIGN BY SITE STATED  | 2                                       | 14.4378    | 57                                         | 16.1492       | 0.894(0.2174-3.6767)   |
| LIPOMA, NOS                                       | 14                                      | 99.7075    | 397                                        | 108.9006      | 0.9156(0.5366-1.5624)  |
| LIPOMA, NOS, HEAD                                 | 2                                       | 14.3754    | 59                                         | 14.7266       | 0.9762(0.2377-4.0087)  |
| LIPOMA, NOS, LOWER EXTREMITY                      | 2                                       | 15.0794    | 118                                        | 27.4233       | 0.5499(0.1356-2.2294)  |
| LIPOMA, NOS, NECK                                 | 2                                       | 13.9177    | 97                                         | 25.0105       | 0.5565(0.1369-2.2614)  |
| LIPOMA, NOS, TRUNK                                | 14                                      | 106.5717   | 386                                        | 93.5891       | 1.1387(0.667-1.944)    |
| LIPOMA, NOS, UPPER EXTREMITY                      | 14                                      | 104.0916   | 231                                        | 55.0462       | 1.891(1.0997-3.2516)   |
| LIPOMA, SKIN, HEAD                                | 0                                       | 0          | 20                                         | 5.7159        | 0(0-Inf)               |
| LIPOMA, SKIN, LOWER EXTREMITY                     | 0                                       | 0          | 9                                          | 2.2915        | 0(0-Inf)               |
| LIPOMA, SKIN, NECK                                | 1                                       | 7.0037     | 7                                          | 2.0625        | 3.3957(0.4126-27.9474) |
| LIPOMA, SKIN, NOS                                 | 5                                       | 38.2349    | 131                                        | 42.7722       | 0.8939(0.3651-2.1886)  |
| LIPOMA, SKIN, TRUNK                               | 2                                       | 13.9161    | 35                                         | 8.7849        | 1.5841(0.3788-6.6248)  |
| LIPOMA, SKIN, UPPER EXTREMITY                     | 0                                       | 0          | 30                                         | 7.6702        | 0(0-Inf)               |
| LIPOMA, SPERMATIC CORD                            | 2                                       | 28.1562    | 69                                         | 40.9122       | 0.6882(0.1684-2.8132)  |
| LIPOMA, SPINAL CORD                               | 0                                       | 0          | 1                                          | 0.3527        | 0(0-Inf)               |
| LIPOMA, SPINDLE CELL CODE ALSO NEO BENIGN BY SITE | 0                                       | 0          | 2                                          | 1.0786        | 0(0-Inf)               |
| LIPOMATOSIS, EMBRYONAL, SEE ALSO LIPOMA           | 0                                       | 0          | 1                                          | 0.3526        | 0(0-Inf)               |
| LIPOMATOSIS, FAMILIAL                             | 0                                       | 0          | 1                                          | 0.8877        | 0(0-Inf)               |
| LIPOMATOSIS, NOS                                  | 0                                       | 0          | 22                                         | 5.9765        | 0(0-Inf)               |
| LIPOMATOSIS, PELVIC                               | 0                                       | 0          | 2                                          | 0.7897        | 0(0-Inf)               |
| LIPOPROTEINEMIA, PRE-B                            | 0                                       | 0          | 1                                          | 1.0371        | 0(0-Inf)               |
| LIPOPROTEINEMIA, TYPE 2                           | 0                                       | 0          | 1                                          | 0.398         | 0(0-Inf)               |
| LIPOSARCOMA CODE ALSO NEOPLASM MALIGNANT BY SITE  | 0                                       | 0          | 4                                          | 1.0353        | 0(0-Inf)               |
| LIPOSCLEROSIS                                     | 1                                       | 7.9394     | 15                                         | 5.1843        | 1.5314(0.2004-11.7027) |
| LISTERIOSIS                                       | 0                                       | 0          | 1                                          | 0.8885        | 0(0-Inf)               |
| LITHIASIS (URINARY) SEE ALSO CALCULUS             | 3                                       | 24.7983    | 87                                         | 32.8478       | 0.7549(0.2383-2.3921)  |
| LIVEDO RETICULARIS                                | 2                                       | 17.6646    | 24                                         | 9.9335        | 1.7783(0.4173-7.5788)  |
| LOCKING JOINT (SEE ALSO DERANGEMENT)              | 0                                       | 0          | 22                                         | 6.5051        | 0(0-Inf)               |
| LONG-LIMBED HABITUS                               | 0                                       | 0          | 1                                          | 0.2729        | 0(0-Inf)               |
| LOOSE, BODY, JOINT                                | 1                                       | 7.0086     | 47                                         | 11.83         | 0.5924(0.0815-4.3064)  |
| LOOSE, BODY, KNEE                                 | 8                                       | 56.4388    | 125                                        | 30.8419       | 1.8299(0.8924-3.7524)  |
| LOOSE, CARTILAGE                                  | 0                                       | 0          | 10                                         | 2.5296        | 0(0-Inf)               |
| LOOSE, STOOLS                                     | 20                                      | 229.6072   | 519                                        | 321.7881      | 0.7135(0.4561-1.1163)  |
| LOOSE, TOOTH                                      | 0                                       | 0          | 19                                         | 6.382         | 0(0-Inf)               |
| LORDOSIS                                          | 0                                       | 0          | 20                                         | 5.5497        | 0(0-Inf)               |
| LOSS, APPETITE                                    | 13                                      | 197.3431   | 175                                        | 161.0978      | 1.225(0.6963-2.1551)   |
| LOSS, BONE DENSITY                                | 9                                       | 63.6596    | 169                                        | 44.5754       | 1.4281(0.7281-2.801)   |
| LOSS, FLUID, ACUTE                                | 0                                       | 0          | 1                                          | 0.8528        | 0(0-Inf)               |
| LOSS, HAIR                                        | 5                                       | 35.5748    | 143                                        | 38.7976       | 0.9169(0.3749-2.2428)  |
| LOSS, HEARING, CONDUCTIVE (8TH NERVE)             | 4                                       | 27.7534    | 140                                        | 34.818        | 0.7971(0.2943-2.1587)  |

| Description                                                      | No. of Positive Cases with Disease Code | Case Rate* | No. of Positive Controls with Disease Code | Control Rate* | Relative Risk (95%CI)    |
|------------------------------------------------------------------|-----------------------------------------|------------|--------------------------------------------|---------------|--------------------------|
| LOSS, HEARING, HIGH TONE--HLHT                                   | 34                                      | 243.57     | 921                                        | 249.7994      | 0.9751(0.6918-1.3743)    |
| LOSS, HEARING, MIXED, NEC                                        | 4                                       | 40.1542    | 211                                        | 106.3292      | 0.3776(0.1403-1.0167)    |
| LOSS, HEARING, NOS, SEE ALSO DEAFNESS                            | 67                                      | 601.7642   | 1501                                       | 614.9558      | 0.9785(0.7656-1.2508)    |
| LOSS, HEARING, SENSORINEURAL, CONGENITAL                         | 1                                       | 17.674     | 9                                          | 3.4315        | 5.1505(0.6442-41.1809)   |
| LOSS, HEARING, SENSORINEURAL, FAMILIAL                           | 0                                       | 0          | 12                                         | 2.8206        | 0(0-Inf)                 |
| LOSS, HEARING, SENSORINEURAL, GENETIC                            | 0                                       | 0          | 9                                          | 2.9076        | 0(0-Inf)                 |
| LOSS, HEARING, SENSORINEURAL, HEREDITARY                         | 0                                       | 0          | 3                                          | 0.7063        | 0(0-Inf)                 |
| LOSS, HEARING, SENSORINEURAL, IDIOPATHIC                         | 0                                       | 0          | 17                                         | 5.6483        | 0(0-Inf)                 |
| LOSS, HEARING, SENSORINEURAL, NOISE-INDUCED                      | 6                                       | 41.5669    | 185                                        | 49.9171       | 0.8327(0.3688-1.8804)    |
| LOSS, HEARING, SENSORINEURAL, NOS--SNHL                          | 106                                     | 969.1072   | 2538                                       | 1021.9839     | 0.9483(0.7804-1.1522)    |
| LOSS, HEARING, SENSORINEURAL, TRAUMATIC                          | 1                                       | 9.7271     | 6                                          | 1.6474        | 5.9047(0.6964-50.0659)   |
| LOSS, LIBIDO, FEMALE                                             | 0                                       | 0          | 59                                         | 12.8213       | 0(0-Inf)                 |
| LOSS, LIBIDO, MALE                                               | 5                                       | 73.1546    | 99                                         | 63.6586       | 1.1492(0.4669-2.8282)    |
| LOSS, MEMORY                                                     | 14                                      | 158.3858   | 288                                        | 171.605       | 0.923(0.5391-1.5802)     |
| LOSS, OF CONCENTRATION                                           | 1                                       | 7.0773     | 3                                          | 0.6925        | 10.2194(1.0204-102.3463) |
| LOSS, PERCEPTUAL (HEARING)                                       | 1                                       | 19.0548    | 2                                          | 2.3953        | 7.955(0.7091-89.2458)    |
| LOSS, SENSATION, NEC                                             | 1                                       | 7.2787     | 44                                         | 12.9511       | 0.562(0.0772-4.0933)     |
| LOSS, SMELL                                                      | 1                                       | 7.2762     | 22                                         | 6.4726        | 1.1242(0.1505-8.3961)    |
| LOSS, TASTE                                                      | 2                                       | 16.146     | 19                                         | 6.7866        | 2.3791(0.5491-10.3073)   |
| LOSS, VISION, NOS (BLINDNESS#)--SEE ALSO VISUAL DISTURBANCE, NEC | 1                                       | 15.6813    | 24                                         | 22.5623       | 0.695(0.0937-5.1528)     |
| LOSS, VISION, ONE EYE                                            | 1                                       | 9.9646     | 19                                         | 9.4763        | 1.0515(0.14-7.896)       |
| LOSS, VISION, TRANSIENT                                          | 0                                       | 0          | 48                                         | 19.7227       | 0(0-Inf)                 |
| LOSS, VISUAL FIELD, TEMPORAL                                     | 0                                       | 0          | 3                                          | 1.5114        | 0(0-Inf)                 |
| LOSS, VISUAL, NOS                                                | 14                                      | 173.3115   | 297                                        | 202.5514      | 0.8556(0.5-1.4642)       |
| LOSS, VOLUME, LUNG                                               | 1                                       | 8.0037     | 12                                         | 4.2683        | 1.8752(0.2415-14.5629)   |
| LOSS, WEIGHT (INTENTIONAL)(DIET THERAPY)                         | 1                                       | 7.6313     | 124                                        | 40.1812       | 0.1899(0.0265-1.3606)    |
| LOSS, WEIGHT (METABOLIC), NOS--SEE ALSO INADEQUATE DIET          | 84                                      | 1135.119   | 1538                                       | 1165.8838     | 0.9736(0.7812-1.2134)    |
| LOW, IRON STORAGE                                                | 0                                       | 0          | 8                                          | 2.2048        | 0(0-Inf)                 |
| LOW, AVERAGE INTELLIGENCE                                        | 1                                       | 16.8859    | 1                                          | 0.3243        | 52.0649(3.1433-862.3909) |
| LOW, CARDIAC OUTPUT                                              | 2                                       | 29.757     | 17                                         | 14.676        | 2.0276(0.4659-8.8246)    |
| LOW, INTRAOCULAR PRESSURE                                        | 0                                       | 0          | 1                                          | 2.4857        | 0(0-Inf)                 |
| LOW, RENAL OUTPUT (FUNCTION)                                     | 0                                       | 0          | 1                                          | 2.4861        | 0(0-Inf)                 |
| LOW, RENAL THRESHOLD                                             | 0                                       | 0          | 1                                          | 0.2354        | 0(0-Inf)                 |
| LOW, SPINAL FLUID PRESSURE                                       | 0                                       | 0          | 1                                          | 0.8877        | 0(0-Inf)                 |
| LOW, VISION, BOTH EYES                                           | 0                                       | 0          | 6                                          | 6.6814        | 0(0-Inf)                 |
| LOW, VISION, ONE EYE                                             | 1                                       | 20.7278    | 4                                          | 5.2699        | 3.9332(0.4354-35.5332)   |
| LUES (NOS)                                                       | 0                                       | 0          | 1                                          | 0.8879        | 0(0-Inf)                 |
| LUMBAGO                                                          | 0                                       | 0          | 11                                         | 2.882         | 0(0-Inf)                 |
| LUMBARIZATION                                                    | 0                                       | 0          | 4                                          | 0.9708        | 0(0-Inf)                 |



| Description                                            | No. of Positive Cases with Disease Code | Case Rate* | No. of Positive Controls with Disease Code | Control Rate* | Relative Risk (95%CI)  |
|--------------------------------------------------------|-----------------------------------------|------------|--------------------------------------------|---------------|------------------------|
| LUPUS, ANTI-INHIBITOR/ANTICOAGULANTS                   | 0                                       | 0          | 12                                         | 5.1154        | 0(0-Inf)               |
| LUPUS, DISCOID                                         | 0                                       | 0          | 15                                         | 3.6284        | 0(0-Inf)               |
| LUPUS, DISCOID, ERYTHEMATOSUS                          | 0                                       | 0          | 24                                         | 6.2263        | 0(0-Inf)               |
| LUPUS, ERYTHEMATOSUS                                   | 1                                       | 6.9551     | 46                                         | 10.9909       | 0.6328(0.0869-4.6066)  |
| LUPUS, ERYTHEMATOSUS, DISSEMINATED                     | 0                                       | 0          | 3                                          | 0.741         | 0(0-Inf)               |
| LUPUS, ERYTHEMATOSUS, SYSTEMIC                         | 1                                       | 7.4707     | 31                                         | 6.9426        | 1.0761(0.146-7.9301)   |
| LUPUS, ERYTHEMATOSUS, SYSTEMIC, DRUG-INDUCED           | 0                                       | 0          | 2                                          | 0.5475        | 0(0-Inf)               |
| LUPUS, NOS (NONTUBERCULOUS, NOT DISSEMINATED)          | 0                                       | 0          | 32                                         | 9.8823        | 0(0-Inf)               |
| LUPUS, NOS (DISSEMINATED)                              | 0                                       | 0          | 7                                          | 1.7389        | 0(0-Inf)               |
| LYMPH NODE (ENLARGED)(PALPABLE)                        | 11                                      | 76.6557    | 319                                        | 79.09         | 0.9692(0.5304-1.7711)  |
| LYMPHADENITIS, ACUTE                                   | 0                                       | 0          | 3                                          | 1.3473        | 0(0-Inf)               |
| LYMPHADENITIS, NOS                                     | 2                                       | 14.147     | 69                                         | 16.2697       | 0.8695(0.2124-3.5594)  |
| LYMPHADENOPATHY, NOS                                   | 13                                      | 93.2367    | 366                                        | 103.1474      | 0.9039(0.5191-1.5741)  |
| LYMPHADENOSIS, NOS                                     | 0                                       | 0          | 1                                          | 0.4751        | 0(0-Inf)               |
| LYMPHANGIECTASIS (SEE ALSO LYMPHEDEMA)                 | 0                                       | 0          | 4                                          | 1.8406        | 0(0-Inf)               |
| LYMPHANGIOLEIOMYOMATOSIS CODE ALSO NEO. NOS BY SITE    | 0                                       | 0          | 1                                          | 0.2354        | 0(0-Inf)               |
| LYMPHANGIOMA, HEAD                                     | 0                                       | 0          | 16                                         | 4.9374        | 0(0-Inf)               |
| LYMPHANGIOMA, LOWER EXTREMITY                          | 0                                       | 0          | 3                                          | 1.1485        | 0(0-Inf)               |
| LYMPHANGIOMA, NECK                                     | 0                                       | 0          | 3                                          | 2.2366        | 0(0-Inf)               |
| LYMPHANGIOMA, NOS                                      | 1                                       | 8.0899     | 8                                          | 2.858         | 2.8306(0.3484-22.9961) |
| LYMPHANGIOMA, TRUNK                                    | 0                                       | 0          | 6                                          | 1.5424        | 0(0-Inf)               |
| LYMPHANGIOMA, UPPER EXTREMITY                          | 0                                       | 0          | 1                                          | 0.2354        | 0(0-Inf)               |
| LYMPHANGIOMYOMATOSIS, NOS (CODE ALSO NEO NOS BY SITE)  | 0                                       | 0          | 1                                          | 0.4048        | 0(0-Inf)               |
| LYMPHANGIOSARCOMA CODE ALSO NEOPLASM MALIGNANT BY SITE | 0                                       | 0          | 1                                          | 0.2729        | 0(0-Inf)               |
| LYMPHANGITIS, ACUTE, NEC, SEE ALSO ABSCESS BY SITE     | 0                                       | 0          | 1                                          | 1.0363        | 0(0-Inf)               |
| LYMPHANGITIS, LOWER EXTREMITY                          | 1                                       | 8.6146     | 32                                         | 8.3915        | 1.0266(0.1397-7.5454)  |
| LYMPHANGITIS, NECK                                     | 0                                       | 0          | 1                                          | 0.234         | 0(0-Inf)               |
| LYMPHANGITIS, NOS                                      | 0                                       | 0          | 39                                         | 9.2351        | 0(0-Inf)               |
| LYMPHANGITIS, TRUNK                                    | 0                                       | 0          | 2                                          | 0.6309        | 0(0-Inf)               |
| LYMPHANGITIS, UPPER EXTREMITY                          | 0                                       | 0          | 36                                         | 8.9864        | 0(0-Inf)               |
| LYMPHEDEMA, ARM                                        | 1                                       | 7.676      | 49                                         | 16.045        | 0.4784(0.0658-3.4764)  |
| LYMPHEDEMA, CONGENITAL                                 | 0                                       | 0          | 3                                          | 0.6536        | 0(0-Inf)               |
| LYMPHEDEMA, GENITAL                                    | 0                                       | 0          | 2                                          | 1.079         | 0(0-Inf)               |
| LYMPHEDEMA, LEG                                        | 3                                       | 20.8395    | 56                                         | 14.0791       | 1.4802(0.461-4.7526)   |
| LYMPHEDEMA, LOWER EXTREMITY                            | 4                                       | 35.4139    | 70                                         | 29.0328       | 1.2198(0.4437-3.3534)  |
| LYMPHEDEMA, NOS                                        | 8                                       | 63.7892    | 166                                        | 57.8509       | 1.1026(0.541-2.2473)   |
| LYMPHEDEMA, OBSTRUCTIVE                                | 0                                       | 0          | 1                                          | 0.3527        | 0(0-Inf)               |
| LYMPHEDEMA, PRAECOX                                    | 0                                       | 0          | 2                                          | 0.7961        | 0(0-Inf)               |
| LYMPHEDEMA, SECONDARY                                  | 0                                       | 0          | 12                                         | 4.2508        | 0(0-Inf)               |

| Description                                                                  | No. of Positive Cases with Disease Code | Case Rate* | No. of Positive Controls with Disease Code | Control Rate* | Relative Risk (95%CI)  |
|------------------------------------------------------------------------------|-----------------------------------------|------------|--------------------------------------------|---------------|------------------------|
| LYMPHEDEMA, SURGICAL, POST LUMPECTOMY                                        | 0                                       | 0          | 2                                          | 0.8098        | 0(0-Inf)               |
| LYMPHEDEMA, SURGICAL, POSTMASTECTOMY                                         | 0                                       | 0          | 62                                         | 35.0012       | 0(0-Inf)               |
| LYMPHEDEMA, TRUNK                                                            | 0                                       | 0          | 6                                          | 2.7536        | 0(0-Inf)               |
| LYMPHEDEMA, UPPER EXTREMITY                                                  | 3                                       | 22.7555    | 84                                         | 26.765        | 0.8502(0.2678-2.6987)  |
| LYMPHOCELE                                                                   | 1                                       | 7.4384     | 21                                         | 6.6868        | 1.1124(0.1488-8.3155)  |
| LYMPHOCYST                                                                   | 0                                       | 0          | 1                                          | 0.4048        | 0(0-Inf)               |
| LYMPHOCYTOMA, NOS, CODE ALSO MALIGNANT LYMPHOMA BY SITE                      | 0                                       | 0          | 6                                          | 1.5075        | 0(0-Inf)               |
| LYMPHOCYTOSIS, NOS                                                           | 9                                       | 65.9899    | 88                                         | 26.0114       | 2.537(1.2716-5.0615)   |
| LYMPHOEPITHELIOMA CODE ALSO NEOPLASM MALIGNANT BY SITE                       | 0                                       | 0          | 2                                          | 1.0783        | 0(0-Inf)               |
| LYMPHOMA, ANAPLASTIC, CODE ALSO MALIGNANT LYMPHOMA BY SITE                   | 0                                       | 0          | 2                                          | 1.8977        | 0(0-Inf)               |
| LYMPHOMA, B-CELL (ANY), CODE ALSO MALIGNANT LYMPHOMA BY SITE                 | 7                                       | 63.5473    | 98                                         | 42.2117       | 1.5054(0.6971-3.2511)  |
| LYMPHOMA, BENIGN, HEAD OR NECK                                               | 0                                       | 0          | 2                                          | 0.4853        | 0(0-Inf)               |
| LYMPHOMA, BONE MARROW                                                        | 5                                       | 40.5905    | 22                                         | 8.0609        | 5.0355(1.889-13.4227)  |
| LYMPHOMA, CLEAVED CELL (ANY), CODE ALSO MALIGNANT LYMPHOMA BY SITE           | 0                                       | 0          | 28                                         | 8.1841        | 0(0-Inf)               |
| LYMPHOMA, CUTANEOUS                                                          | 0                                       | 0          | 13                                         | 3.321         | 0(0-Inf)               |
| LYMPHOMA, CUTANEOUS-T-CELL, NOS                                              | 1                                       | 8.0089     | 8                                          | 2.8199        | 2.8401(0.3498-23.0583) |
| LYMPHOMA, CUTIS                                                              | 0                                       | 0          | 5                                          | 1.3719        | 0(0-Inf)               |
| LYMPHOMA, DIFFUSE, CODE ALSO MALIGNANT LYMPHOMA BY SITE                      | 5                                       | 47.0608    | 59                                         | 26.8644       | 1.7518(0.7001-4.3836)  |
| LYMPHOMA, DIFFUSE, WELL DIFFERENTIATED, CODE ALSO MALIGNANT LYMPHOMA BY SITE | 0                                       | 0          | 2                                          | 0.5709        | 0(0-Inf)               |
| LYMPHOMA, FOLLICULAR, CODE ALSO MALIGNANT LYMPHOMA BY SITE                   | 0                                       | 0          | 44                                         | 13.5646       | 0(0-Inf)               |
| LYMPHOMA, HELPER CELL, CODE ALSO MALIGNANT LYMPHOMA BY SITE                  | 0                                       | 0          | 1                                          | 0.234         | 0(0-Inf)               |
| LYMPHOMA, HISTIOCYTIC, CODE ALSO MALIGNANT LYMPHOMA BY SITE                  | 0                                       | 0          | 4                                          | 0.8642        | 0(0-Inf)               |
| LYMPHOMA, HODGKIN'S, NOS, SEE ALSO DISEASE, HODGKIN'S                        | 0                                       | 0          | 11                                         | 4.0276        | 0(0-Inf)               |
| LYMPHOMA, IMMUNOBLASTIC, CODE ALSO MALIGNANT LYMPHOMA BY SITE                | 0                                       | 0          | 4                                          | 1.0353        | 0(0-Inf)               |
| LYMPHOMA, IN REMISSION                                                       | 5                                       | 38.2535    | 89                                         | 28.6547       | 1.335(0.5404-3.2982)   |
| LYMPHOMA, LARGE CELL, CODE ALSO MALIGNANT LYMPHOMA BY SITE                   | 5                                       | 51.7163    | 69                                         | 36.1165       | 1.4319(0.5758-3.561)   |
| LYMPHOMA, LENNERT'S, CODE ALSO MALIGNANT LYMPHOMA BY SITE                    | 0                                       | 0          | 1                                          | 0.8528        | 0(0-Inf)               |

| Description                                                           | No. of Positive Cases with Disease Code | Case Rate* | No. of Positive Controls with Disease Code | Control Rate* | Relative Risk (95%CI)     |
|-----------------------------------------------------------------------|-----------------------------------------|------------|--------------------------------------------|---------------|---------------------------|
| LYMPHOMA, LYMPHOBLASTIC, CODE ALSO MALIGNANT LYMPHOMA BY SITE         | 0                                       | 0          | 1                                          | 0.8877        | 0(0-Inf)                  |
| LYMPHOMA, LYMPHOCYTIC, CODE ALSO MALIGNANT LYMPHOMA BY SITE           | 6                                       | 47.2915    | 42                                         | 14.372        | 3.2905(1.389-7.7951)      |
| LYMPHOMA, LYMPHOPLASMACYTIC, CODE ALSO MALIGNANT LYMPHOMA BY SITE     | 5                                       | 45.5949    | 1                                          | 0.435         | 104.808(11.9555-918.8008) |
| LYMPHOMA, MALIGNANT, BLADDER                                          | 0                                       | 0          | 1                                          | 0.3526        | 0(0-Inf)                  |
| LYMPHOMA, MALIGNANT, BONE                                             | 1                                       | 8.2774     | 4                                          | 1.4872        | 5.5656(0.6059-51.1215)    |
| LYMPHOMA, MALIGNANT, CNS                                              | 0                                       | 0          | 3                                          | 1.5755        | 0(0-Inf)                  |
| LYMPHOMA, MALIGNANT, EXTREMITY                                        | 0                                       | 0          | 4                                          | 1.3733        | 0(0-Inf)                  |
| LYMPHOMA, MALIGNANT, GENITAL ORGAN                                    | 0                                       | 0          | 1                                          | 0.8878        | 0(0-Inf)                  |
| LYMPHOMA, MALIGNANT, HEAD OR NECK (SUPRACLAVICULAR)                   | 2                                       | 14.5844    | 37                                         | 10.8914       | 1.3391(0.321-5.5868)      |
| LYMPHOMA, MALIGNANT, INTERNAL ORGAN, NEC                              | 0                                       | 0          | 2                                          | 0.4853        | 0(0-Inf)                  |
| LYMPHOMA, MALIGNANT, INTESTINE                                        | 1                                       | 9.8642     | 9                                          | 4.4407        | 2.2213(0.278-17.7483)     |
| LYMPHOMA, MALIGNANT, KIDNEY                                           | 0                                       | 0          | 1                                          | 0.2729        | 0(0-Inf)                  |
| LYMPHOMA, MALIGNANT, LEPTOMENINGEAL                                   | 0                                       | 0          | 1                                          | 0.3526        | 0(0-Inf)                  |
| LYMPHOMA, MALIGNANT, LIVER                                            | 0                                       | 0          | 4                                          | 1.5793        | 0(0-Inf)                  |
| LYMPHOMA, MALIGNANT, LUNG                                             | 2                                       | 17.2677    | 9                                          | 3.5859        | 4.8154(1.0238-22.6499)    |
| LYMPHOMA, MALIGNANT, MENINGEAL                                        | 0                                       | 0          | 1                                          | 0.3526        | 0(0-Inf)                  |
| LYMPHOMA, MALIGNANT, NASOPHARYNGEAL                                   | 0                                       | 0          | 2                                          | 0.8096        | 0(0-Inf)                  |
| LYMPHOMA, MALIGNANT, NOS                                              | 9                                       | 79.4141    | 143                                        | 58.6981       | 1.3529(0.6881-2.6599)     |
| LYMPHOMA, MALIGNANT, OCULAR                                           | 0                                       | 0          | 2                                          | 0.5475        | 0(0-Inf)                  |
| LYMPHOMA, MALIGNANT, PAROTID                                          | 0                                       | 0          | 5                                          | 1.94          | 0(0-Inf)                  |
| LYMPHOMA, MALIGNANT, SPINAL CORD                                      | 1                                       | 7.8252     | 5                                          | 1.6847        | 4.645(0.5298-40.7233)     |
| LYMPHOMA, MALIGNANT, SPLEEN                                           | 1                                       | 8.0502     | 5                                          | 1.8056        | 4.4584(0.5107-38.9243)    |
| LYMPHOMA, MALIGNANT, STOMACH                                          | 2                                       | 21.9012    | 12                                         | 6.8866        | 3.1802(0.7041-14.364)     |
| LYMPHOMA, MALIGNANT, TONSIL                                           | 0                                       | 0          | 1                                          | 0.4048        | 0(0-Inf)                  |
| LYMPHOMA, MANTLE CELL, CODE ALSO MALIGNANT LYMPHOMA BY SITE           | 0                                       | 0          | 8                                          | 3.8593        | 0(0-Inf)                  |
| LYMPHOMA, METASTATIC, CODE ALSO MALIGNANT LYMPHOMA BY SITE            | 1                                       | 20.8115    | 1                                          | 1.3776        | 15.107(0.9258-246.5146)   |
| LYMPHOMA, MIXED (LYMPHO/HISTIO), CODE ALSO MALIGNANT LYMPHOMA BY SITE | 1                                       | 7.4495     | 9                                          | 2.1195        | 3.5147(0.4379-28.2125)    |
| LYMPHOMA, NODULAR, CODE ALSO MALIGNANT LYMPHOMA BY SITE               | 0                                       | 0          | 7                                          | 1.6114        | 0(0-Inf)                  |
| LYMPHOMA, NON-CLEAVED, CODE ALSO MALIGNANT LYMPHOMA BY SITE           | 0                                       | 0          | 2                                          | 0.4854        | 0(0-Inf)                  |
| LYMPHOMA, NON-HODGKIN'S, CODE ALSO MALIGNANT LYMPHOMA BY SITE         | 7                                       | 60.3675    | 103                                        | 41.0704       | 1.4699(0.6815-3.1702)     |
| LYMPHOMA, NOS, SEE ALSO MALIGNANT LYMPHOMA                            | 14                                      | 138.6396   | 89                                         | 43.5803       | 3.1812(1.8034-5.6117)     |

| Description                                                  | No. of Positive Cases with Disease Code | Case Rate* | No. of Positive Controls with Disease Code | Control Rate* | Relative Risk (95%CI)    |
|--------------------------------------------------------------|-----------------------------------------|------------|--------------------------------------------|---------------|--------------------------|
| LYMPHOMA, OCULAR                                             | 0                                       | 0          | 3                                          | 0.746         | 0(0-Inf)                 |
| LYMPHOMA, PLASMACYTOID, CODE ALSO MALIGNANT LYMPHOMA BY SITE | 4                                       | 31.9071    | 9                                          | 3.1594        | 10.0991(3.0535-33.4016)  |
| LYMPHOMA, PLEOMORPHIC, CODE ALSO MALIGNANT LYMPHOMA BY SITE  | 0                                       | 0          | 1                                          | 0.8879        | 0(0-Inf)                 |
| LYMPHOMA, RECURRENT, CODE ALSO MALIGNANT LYMPHOMA BY SITE    | 0                                       | 0          | 25                                         | 12.2608       | 0(0-Inf)                 |
| LYMPHOMA, RELAPSE, CODE ALSO MALIGNANT LYMPHOMA BY SITE      | 1                                       | 8.2238     | 14                                         | 5.2346        | 1.571(0.2049-12.045)     |
| LYMPHOMA, SMALL CELL, CODE ALSO MALIGNANT LYMPHOMA BY SITE   | 5                                       | 40.0787    | 55                                         | 19.4214       | 2.0636(0.8219-5.1814)    |
| LYMPHOMA, T-CELL, CODE ALSO MALIGNANT LYMPHOMA BY SITE       | 0                                       | 0          | 15                                         | 7.372         | 0(0-Inf)                 |
| LYMPHOMATOSIS CODE ALSO LYMPHOMA BY SITE IF STATED           | 0                                       | 0          | 1                                          | 0.3526        | 0(0-Inf)                 |
| LYMPHOPENIA, NOS                                             | 0                                       | 0          | 3                                          | 1.2104        | 0(0-Inf)                 |
| LYMPHOSARCOMA, NOS, CODE ALSO MALIGNANT LYMPHOMA BY SITE     | 0                                       | 0          | 1                                          | 0.8527        | 0(0-Inf)                 |
| MACERATION, SKIN                                             | 3                                       | 30.0368    | 34                                         | 17.0507       | 1.7616(0.5381-5.7667)    |
| MACROCYTIC INDICES                                           | 0                                       | 0          | 2                                          | 1.7761        | 0(0-Inf)                 |
| MACROCYTOSIS                                                 | 21                                      | 183.7436   | 280                                        | 112.9936      | 1.6261(1.0417-2.5385)    |
| MACROGLOBULINEMIA, NOS                                       | 1                                       | 30.5999    | 0                                          | 0             | 14402855192.6222(0-Inf)  |
| MACROGLOBULINEMIA, WALDENSTROM'S                             | 4                                       | 37.7232    | 1                                          | 0.4611        | 81.8037(8.9524-747.4921) |
| MACROGLOSSIA                                                 | 0                                       | 0          | 2                                          | 0.8097        | 0(0-Inf)                 |
| MACULA, CORNEA, NOS                                          | 0                                       | 0          | 2                                          | 0.7898        | 0(0-Inf)                 |
| MACULAR CELLOPHANE                                           | 0                                       | 0          | 11                                         | 3.5584        | 0(0-Inf)                 |
| MACULAR PUCKER                                               | 0                                       | 0          | 1                                          | 0.4048        | 0(0-Inf)                 |
| MACULES                                                      | 1                                       | 7.426      | 83                                         | 25.4205       | 0.2921(0.0406-2.1023)    |
| MACULOPATHY, NOS                                             | 4                                       | 31.7449    | 73                                         | 25.0752       | 1.266(0.4609-3.4771)     |
| MAILED IN SPECIMEN                                           | 0                                       | 0          | 1                                          | 0.3526        | 0(0-Inf)                 |
| MALABSORPTION, BILE ACID                                     | 0                                       | 0          | 1                                          | 0.4048        | 0(0-Inf)                 |
| MALABSORPTION, NOS                                           | 1                                       | 7.0338     | 52                                         | 13.886        | 0.5065(0.0698-3.6757)    |
| MALACOPLAKIA, BLADDER                                        | 0                                       | 0          | 1                                          | 0.2729        | 0(0-Inf)                 |
| MALADJUSTMENT, FAMILY, NEC                                   | 0                                       | 0          | 2                                          | 0.5069        | 0(0-Inf)                 |
| MALADJUSTMENT, OCCUPATIONAL                                  | 0                                       | 0          | 2                                          | 0.4681        | 0(0-Inf)                 |
| MALADJUSTMENT, PSYCHOSOCIAL, NEC                             | 0                                       | 0          | 3                                          | 2.0475        | 0(0-Inf)                 |
| MALADJUSTMENT, SOCIAL, NEC                                   | 1                                       | 11.7635    | 35                                         | 22.5407       | 0.5219(0.0713-3.8204)    |
| MALAISE                                                      | 12                                      | 110.1043   | 365                                        | 161.3288      | 0.6825(0.3835-1.2144)    |
| MALALIGNMENT, DENTAL                                         | 1                                       | 7.7769     | 0                                          | 0             | 17337293981.5999(0-Inf)  |
| MALARIA, NOS                                                 | 0                                       | 0          | 1                                          | 0.3526        | 0(0-Inf)                 |
| MALFITTING DENTURES                                          | 10                                      | 105.1137   | 110                                        | 59.0329       | 1.7806(0.9293-3.4118)    |
| MALFORMATION, ARNOLD-CHIARI                                  | 1                                       | 7.1852     | 7                                          | 1.9703        | 3.6467(0.4395-30.2559)   |

| Description                                                                 | No. of Positive Cases with Disease Code | Case Rate* | No. of Positive Controls with Disease Code | Control Rate* | Relative Risk (95%CI)    |
|-----------------------------------------------------------------------------|-----------------------------------------|------------|--------------------------------------------|---------------|--------------------------|
| MALFORMATION, ARTERIOVENOUS, (SKIN), SEE ALSO FISTULA ARTERIOVENOUS BY SITE | 0                                       | 0          | 3                                          | 1.2105        | 0(0-Inf)                 |
| MALFORMATION, ARTERIOVENOUS, NOS, SEE ALSO FISTULA                          | 0                                       | 0          | 15                                         | 11.816        | 0(0-Inf)                 |
| MALFORMATION, TOOTH                                                         | 0                                       | 0          | 6                                          | 1.9673        | 0(0-Inf)                 |
| MALFUNCTION, CARDIAC DEFIBRILLATOR (AICD SYSTEM)                            | 0                                       | 0          | 21                                         | 11.8019       | 0(0-Inf)                 |
| MALFUNCTION, EUSTACHIAN TUBE                                                | 0                                       | 0          | 2                                          | 0.4854        | 0(0-Inf)                 |
| MALFUNCTION, GASTROSTOMY TUBE                                               | 0                                       | 0          | 1                                          | 2.4945        | 0(0-Inf)                 |
| MALFUNCTION, NEPHROSTOMY                                                    | 0                                       | 0          | 1                                          | 0.8527        | 0(0-Inf)                 |
| MALFUNCTION, NERVE STIMULATOR (PACEMAKER) (TENS)                            | 0                                       | 0          | 2                                          | 0.7052        | 0(0-Inf)                 |
| MALFUNCTION, PACEMAKER, CARDIAC                                             | 6                                       | 65.3319    | 71                                         | 40.0129       | 1.6328(0.7072-3.7695)    |
| MALFUNCTION, PROSTHESIS, HEART VALVE, BALL VARIANCE, CODE ALSO STATUS #     | 0                                       | 0          | 1                                          | 0.234         | 0(0-Inf)                 |
| MALFUNCTION, PROSTHESIS, HEART VALVE, NOS, CODE ALSO STATUS #               | 1                                       | 8.0023     | 17                                         | 5.967         | 1.3411(0.177-10.1607)    |
| MALFUNCTION, PROSTHESIS, INTERNAL, NOS                                      | 0                                       | 0          | 3                                          | 0.9166        | 0(0-Inf)                 |
| MALFUNCTION, PROSTHESIS, ORTHOPEDIC, ANKLE                                  | 0                                       | 0          | 1                                          | 0.2354        | 0(0-Inf)                 |
| MALFUNCTION, PROSTHESIS, ORTHOPEDIC, ELBOW                                  | 0                                       | 0          | 2                                          | 0.7898        | 0(0-Inf)                 |
| MALFUNCTION, PROSTHESIS, ORTHOPEDIC, FINGER                                 | 0                                       | 0          | 3                                          | 0.7064        | 0(0-Inf)                 |
| MALFUNCTION, PROSTHESIS, ORTHOPEDIC, HIP                                    | 7                                       | 60.9611    | 144                                        | 57.5147       | 1.0599(0.4952-2.2686)    |
| MALFUNCTION, PROSTHESIS, ORTHOPEDIC, JOINT, NOS                             | 0                                       | 0          | 2                                          | 0.4709        | 0(0-Inf)                 |
| MALFUNCTION, PROSTHESIS, ORTHOPEDIC, KNEE                                   | 5                                       | 50.7219    | 106                                        | 53.5872       | 0.9465(0.3851-2.3263)    |
| MALFUNCTION, PROSTHESIS, ORTHOPEDIC, KNUCKLE                                | 0                                       | 0          | 1                                          | 0.4049        | 0(0-Inf)                 |
| MALFUNCTION, PROSTHESIS, ORTHOPEDIC, SHOULDER                               | 0                                       | 0          | 8                                          | 3.2143        | 0(0-Inf)                 |
| MALFUNCTION, PROSTHESIS, ORTHOPEDIC, TOE                                    | 0                                       | 0          | 4                                          | 0.9419        | 0(0-Inf)                 |
| MALFUNCTION, PROSTHESIS, ORTHOPEDIC, WRIST                                  | 0                                       | 0          | 1                                          | 0.398         | 0(0-Inf)                 |
| MALFUNCTION, PROSTHESIS, PENILE                                             | 1                                       | 13.9048    | 30                                         | 17.4485       | 0.7969(0.1083-5.8638)    |
| MALFUNCTION, PROSTHESIS, TEMPOROMANDIBULAR JOINT                            | 0                                       | 0          | 1                                          | 0.2354        | 0(0-Inf)                 |
| MALFUNCTION, TYMPANOSTOMY / MYRINGOTOMY (ANY EAR) TUBE                      | 0                                       | 0          | 7                                          | 3.3516        | 0(0-Inf)                 |
| MALFUNCTION, VENTRICULAR SHUNT                                              | 1                                       | 7.3116     | 3                                          | 0.6504        | 11.2425(1.1178-113.0741) |
| MALIGNANCY SEE ALSO NEOPLASM MALIGNANT BY SITE                              | 1                                       | 9.1771     | 19                                         | 8.3486        | 1.0992(0.1462-8.2633)    |
| MALIGNANT CELLS, ABDOMEN                                                    | 0                                       | 0          | 3                                          | 0.6986        | 0(0-Inf)                 |
| MALIGNANT CELLS, SPUTUM, NOS                                                | 0                                       | 0          | 2                                          | 1.0783        | 0(0-Inf)                 |
| MALIGNANT CELLS, URINE                                                      | 1                                       | 13.9603    | 63                                         | 50.082        | 0.2787(0.0386-2.0123)    |
| MALLET FINGER                                                               | 2                                       | 14.9396    | 124                                        | 29.8007       | 0.5013(0.1238-2.0308)    |
| MALNUTRITION, CALORIE-PROTEIN, NOS                                          | 0                                       | 0          | 8                                          | 10.845        | 0(0-Inf)                 |
| MALNUTRITION, NOS                                                           | 4                                       | 54.7722    | 121                                        | 96.6318       | 0.5668(0.2091-1.5368)    |
| MALOCCLUSION, ACTIVE ORTHODONTIC TREATMENT COMPLETED                        | 1                                       | 12.7648    | 12                                         | 3.433         | 3.7183(0.4779-28.9278)   |
| MALOCCLUSION, CLASS 1                                                       | 5                                       | 62.3585    | 104                                        | 29.8441       | 2.0895(0.8489-5.143)     |
| MALOCCLUSION, CLASS 2                                                       | 4                                       | 59.9565    | 88                                         | 28.8515       | 2.0781(0.7606-5.6777)    |

| Description                                                       | No. of Positive Cases with Disease Code | Case Rate* | No. of Positive Controls with Disease Code | Control Rate* | Relative Risk (95%CI)  |
|-------------------------------------------------------------------|-----------------------------------------|------------|--------------------------------------------|---------------|------------------------|
| MALOCCLUSION, CLASS 3                                             | 0                                       | 0          | 21                                         | 7.4092        | 0(0-Inf)               |
| MALOCCLUSION, DEEP BITE (CLOSED)                                  | 3                                       | 50.0532    | 52                                         | 18.1485       | 2.758(0.8575-8.8704)   |
| MALOCCLUSION, DUE TO MISSING TEETH                                | 0                                       | 0          | 1                                          | 0.234         | 0(0-Inf)               |
| MALOCCLUSION, NOS                                                 | 6                                       | 43.0246    | 89                                         | 20.7339       | 2.0751(0.9037-4.7649)  |
| MALOCCLUSION, OPENBITE                                            | 0                                       | 0          | 19                                         | 6.1951        | 0(0-Inf)               |
| MALOCCLUSION, OVERBITE                                            | 0                                       | 0          | 8                                          | 1.9282        | 0(0-Inf)               |
| MALPOSITION, GASTROINTESTINAL TRACT, NOS                          | 0                                       | 0          | 2                                          | 0.571         | 0(0-Inf)               |
| MALPOSITION, INTESTINE, CONGENITAL                                | 0                                       | 0          | 1                                          | 0.234         | 0(0-Inf)               |
| MALPOSITION, STOMACH, NOS                                         | 0                                       | 0          | 4                                          | 1.6251        | 0(0-Inf)               |
| MALPOSITION, TEETH--MALT                                          | 11                                      | 122.5543   | 420                                        | 123.3591      | 0.9935(0.5453-1.81)    |
| MALROTATION, COLON                                                | 0                                       | 0          | 3                                          | 0.8034        | 0(0-Inf)               |
| MALROTATION, KIDNEY                                               | 0                                       | 0          | 5                                          | 2.7733        | 0(0-Inf)               |
| MALROTATION, SMALL INTESTINE                                      | 0                                       | 0          | 1                                          | 0.4049        | 0(0-Inf)               |
| MALTOMA CODE ALSO NEOPLASM MALIGNANT OR LYMPHOMA BY SITE          | 1                                       | 7.8851     | 10                                         | 3.4154        | 2.3086(0.2916-18.2767) |
| MAMMILLATION, NOS (ANY PROCTO DIAGNOSIS NOT ELSEWHERE CLASSIFIED) | 0                                       | 0          | 5                                          | 1.4453        | 0(0-Inf)               |
| MAMMILLATION, RECTAL                                              | 0                                       | 0          | 3                                          | 1.5117        | 0(0-Inf)               |
| MANIA                                                             | 2                                       | 13.912     | 37                                         | 9.4693        | 1.4692(0.3519-6.1331)  |
| MARASMUS (MALNUTRITION#)                                          | 0                                       | 0          | 1                                          | 0.8528        | 0(0-Inf)               |
| MARCHE A PETITS PAS                                               | 1                                       | 7.1771     | 0                                          | 0             | 12720181507.287(0-Inf) |
| MASOCHISM                                                         | 0                                       | 0          | 1                                          | 0.398         | 0(0-Inf)               |
| MASS, ABDOMINAL                                                   | 9                                       | 78.2241    | 160                                        | 64.3998       | 1.2147(0.6191-2.383)   |
| MASS, ADNEXAL (FEMALE)                                            | 4                                       | 56.5121    | 87                                         | 46.2828       | 1.221(0.4463-3.3404)   |
| MASS, ANUS                                                        | 2                                       | 17.0519    | 36                                         | 14.0728       | 1.2117(0.2903-5.0575)  |
| MASS, AXILLA                                                      | 0                                       | 0          | 35                                         | 11.5256       | 0(0-Inf)               |
| MASS, AXILLA, SKIN/SUBCUTANEOUS                                   | 1                                       | 6.9803     | 27                                         | 7.0176        | 0.9947(0.1344-7.3631)  |
| MASS, BONE, EXTREMITY                                             | 0                                       | 0          | 8                                          | 1.9345        | 0(0-Inf)               |
| MASS, BONE, NEC                                                   | 1                                       | 7.0504     | 7                                          | 2.0035        | 3.519(0.4262-29.0532)  |
| MASS, BREAST                                                      | 20                                      | 141.5537   | 711                                        | 176.911       | 0.8001(0.5125-1.2493)  |
| MASS, CAUDATE                                                     | 0                                       | 0          | 1                                          | 0.3526        | 0(0-Inf)               |
| MASS, CHEEK (BUCCAL CAVITY)                                       | 2                                       | 14.1425    | 19                                         | 5.0886        | 2.7792(0.6398-12.072)  |
| MASS, CHEST                                                       | 6                                       | 47.4966    | 98                                         | 33.4435       | 1.4202(0.6207-3.2496)  |
| MASS, CHEST, MUSCULOSKELETAL                                      | 0                                       | 0          | 1                                          | 0.8528        | 0(0-Inf)               |
| MASS, EAR                                                         | 0                                       | 0          | 22                                         | 5.4578        | 0(0-Inf)               |
| MASS, EXTRARECTAL                                                 | 1                                       | 7.1953     | 14                                         | 3.2659        | 2.2032(0.2863-16.9529) |
| MASS, EYE                                                         | 1                                       | 8.013      | 26                                         | 9.1302        | 0.8776(0.1184-6.5043)  |
| MASS, FACE                                                        | 0                                       | 0          | 41                                         | 15.5589       | 0(0-Inf)               |
| MASS, GENITAL ORGAN, FEMALE, NOS                                  | 3                                       | 43.3525    | 100                                        | 57.0755       | 0.7596(0.2401-2.4025)  |
| MASS, GROIN                                                       | 0                                       | 0          | 31                                         | 18.2073       | 0(0-Inf)               |

| Description                            | No. of Positive Cases with Disease Code |            | No. of Positive Controls with Disease Code |               | Relative Risk (95%CI)   |
|----------------------------------------|-----------------------------------------|------------|--------------------------------------------|---------------|-------------------------|
|                                        |                                         | Case Rate* |                                            | Control Rate* |                         |
| MASS, GROIN, SKIN/SUBCUTANEOUS         | 0                                       | 0          | 11                                         | 6.7428        | 0(0-Inf)                |
| MASS, HEAD                             | 5                                       | 34.9325    | 103                                        | 26.6508       | 1.3107(0.5323-3.2273)   |
| MASS, HEAD, MUSCULOSKELETAL            | 1                                       | 7.5864     | 4                                          | 0.9427        | 8.0475(0.8714-74.3159)  |
| MASS, JOINT                            | 0                                       | 0          | 14                                         | 3.4993        | 0(0-Inf)                |
| MASS, KIDNEY                           | 4                                       | 45.0474    | 46                                         | 27.0993       | 1.6623(0.5961-4.6354)   |
| MASS, LOWER EXTREMITY                  | 2                                       | 16.3049    | 141                                        | 51.1324       | 0.3189(0.0789-1.2891)   |
| MASS, LOWER EXTREMITY, MUSCULOSKELETAL | 0                                       | 0          | 12                                         | 3.6206        | 0(0-Inf)                |
| MASS, LUNG                             | 13                                      | 134.6641   | 176                                        | 92.4417       | 1.4567(0.8276-2.5641)   |
| MASS, LYMPH NODE                       | 0                                       | 0          | 5                                          | 1.3401        | 0(0-Inf)                |
| MASS, MEDIASTINAL                      | 1                                       | 11.2898    | 26                                         | 15.4519       | 0.7306(0.0988-5.4043)   |
| MASS, MOUTH, STRUCTURES OF             | 2                                       | 14.0006    | 29                                         | 7.5936        | 1.8437(0.4366-7.7865)   |
| MASS, MUSCLE                           | 0                                       | 0          | 13                                         | 3.8384        | 0(0-Inf)                |
| MASS, NASOPHARYNGEAL                   | 0                                       | 0          | 10                                         | 2.8853        | 0(0-Inf)                |
| MASS, NECK                             | 10                                      | 72.6174    | 298                                        | 87.5507       | 0.8294(0.441-1.56)      |
| MASS, NOSE OR SINUS                    | 2                                       | 15.3245    | 24                                         | 7.8383        | 1.9551(0.4586-8.3354)   |
| MASS, PARATRACHEAL                     | 0                                       | 0          | 3                                          | 0.9608        | 0(0-Inf)                |
| MASS, PAROTID                          | 2                                       | 19.0474    | 70                                         | 32.5488       | 0.5852(0.1432-2.3916)   |
| MASS, PELVIC (FEMALE)                  | 7                                       | 99.9959    | 175                                        | 77.5586       | 1.2893(0.6039-2.7524)   |
| MASS, PELVIC (MALE)                    | 1                                       | 10.5894    | 6                                          | 3.2975        | 3.2113(0.3822-26.9798)  |
| MASS, PENIS                            | 0                                       | 0          | 2                                          | 1.079         | 0(0-Inf)                |
| MASS, PRESACRAL                        | 0                                       | 0          | 2                                          | 1.776         | 0(0-Inf)                |
| MASS, PROSTATE                         | 0                                       | 0          | 11                                         | 14.8375       | 0(0-Inf)                |
| MASS, RENAL                            | 9                                       | 101.6439   | 163                                        | 95.9404       | 1.0594(0.5406-2.0762)   |
| MASS, SCROTUM                          | 4                                       | 62.1586    | 63                                         | 44.8001       | 1.3875(0.5035-3.823)    |
| MASS, SKIN                             | 0                                       | 0          | 15                                         | 3.5707        | 0(0-Inf)                |
| MASS, SOFT TISSUE, NOS                 | 2                                       | 17.9618    | 41                                         | 17.4055       | 1.032(0.2485-4.285)     |
| MASS, SPINAL CORD (CALCIFIED)          | 3                                       | 33.3803    | 5                                          | 2.9422        | 11.3453(2.6566-48.4513) |
| MASS, SPLEEN                           | 0                                       | 0          | 7                                          | 3.9621        | 0(0-Inf)                |
| MASS, SUBSTERNAL                       | 0                                       | 0          | 1                                          | 0.4048        | 0(0-Inf)                |
| MASS, TESTICLE                         | 3                                       | 48.3121    | 52                                         | 38.6958       | 1.2485(0.3888-4.0096)   |
| MASS, THIGH                            | 0                                       | 0          | 11                                         | 3.1331        | 0(0-Inf)                |
| MASS, THROAT                           | 0                                       | 0          | 10                                         | 3.1515        | 0(0-Inf)                |
| MASS, TRUNK                            | 0                                       | 0          | 64                                         | 25.4387       | 0(0-Inf)                |
| MASS, TRUNK, MUSCULOSKELETAL           | 0                                       | 0          | 1                                          | 0.4049        | 0(0-Inf)                |
| MASS, TRUNK, SKIN/SUBCUTANEOUS         | 0                                       | 0          | 67                                         | 15.5488       | 0(0-Inf)                |
| MASS, UMBILICUS                        | 0                                       | 0          | 4                                          | 1.1698        | 0(0-Inf)                |
| MASS, UPPER EXTREMITY                  | 4                                       | 32.1377    | 202                                        | 71.472        | 0.4497(0.1669-1.2113)   |
| MASS, UPPER EXTREMITY, MUSCULOSKELETAL | 0                                       | 0          | 29                                         | 9.5023        | 0(0-Inf)                |
| MASS, UTERUS                           | 0                                       | 0          | 10                                         | 2.1878        | 0(0-Inf)                |
| MASTALGIA                              | 9                                       | 64.0642    | 347                                        | 78.7145       | 0.8139(0.4192-1.5801)   |

| Description                               | No. of Positive Cases with Disease Code | Case Rate* | No. of Positive Controls with Disease Code | Control Rate* | Relative Risk (95%CI)   |
|-------------------------------------------|-----------------------------------------|------------|--------------------------------------------|---------------|-------------------------|
| MASTITIS, ACUTE                           | 0                                       | 0          | 16                                         | 12.2399       | 0(0-Inf)                |
| MASTITIS, CHRONIC                         | 0                                       | 0          | 14                                         | 3.3192        | 0(0-Inf)                |
| MASTITIS, CYSTIC                          | 3                                       | 135.2494   | 69                                         | 54.4635       | 2.4833(0.7802-7.9039)   |
| MASTITIS, CYSTIC, CHRONIC                 | 0                                       | 0          | 49                                         | 41.4866       | 0(0-Inf)                |
| MASTITIS, FIBROCYSTIC                     | 2                                       | 80.2604    | 141                                        | 103.6598      | 0.7743(0.1916-3.1292)   |
| MASTITIS, FIBROUS                         | 3                                       | 100.6469   | 34                                         | 21.7409       | 4.6294(1.4139-15.1569)  |
| MASTITIS, NODULAR                         | 1                                       | 6.9607     | 1                                          | 0.2537        | 27.432(1.5971-471.1611) |
| MASTITIS, NOS                             | 2                                       | 19.7406    | 73                                         | 17.5202       | 1.1267(0.2756-4.6058)   |
| MASTITIS, POST PARTUM (PUERPERAL)         | 0                                       | 0          | 3                                          | 2.4839        | 0(0-Inf)                |
| MASTOCYTOSIS (SYSTEMIC)                   | 0                                       | 0          | 4                                          | 1.1418        | 0(0-Inf)                |
| MASTOIDITIS, CHRONIC                      | 0                                       | 0          | 3                                          | 0.9609        | 0(0-Inf)                |
| MASTOIDITIS, NOS                          | 1                                       | 6.9327     | 17                                         | 4.209         | 1.6471(0.2169-12.507)   |
| MASTOIDITIS, SUBACUTE                     | 1                                       | 7.1805     | 0                                          | 0             | 12723010237.5343(0-Inf) |
| MASTOPLASIA, CYSTIC                       | 0                                       | 0          | 1                                          | 0.827         | 0(0-Inf)                |
| MATERNAL, DIABETES MELLITUS               | 1                                       | 7.1824     | 0                                          | 0             | 12728526370.0273(0-Inf) |
| MATERNAL, PRE-ECLAMPSIA WITH HYPERTENSION | 0                                       | 0          | 1                                          | 0.234         | 0(0-Inf)                |
| MATTERY (MATTERING) EYES                  | 0                                       | 0          | 25                                         | 24.9705       | 0(0-Inf)                |
| MEASLES, LATE EFFECT OF                   | 0                                       | 0          | 1                                          | 0.2354        | 0(0-Inf)                |
| MEATITIS (URETHRAL)                       | 0                                       | 0          | 2                                          | 1.7777        | 0(0-Inf)                |
| MEDIASTINITIS, NOS                        | 0                                       | 0          | 3                                          | 1.9013        | 0(0-Inf)                |
| MEGA CISTERNA MAGNA                       | 0                                       | 0          | 1                                          | 0.8877        | 0(0-Inf)                |
| MEGACOLON, ACQUIRED                       | 0                                       | 0          | 1                                          | 0.2354        | 0(0-Inf)                |
| MEGACOLON, NOS                            | 2                                       | 15.4976    | 8                                          | 2.6329        | 5.8862(1.2236-28.3152)  |
| MEGACOLON, TOXIC                          | 0                                       | 0          | 2                                          | 1.1971        | 0(0-Inf)                |
| MEGACYSTIS                                | 0                                       | 0          | 2                                          | 0.5709        | 0(0-Inf)                |
| MEGALOURETER, CONGENITAL                  | 0                                       | 0          | 3                                          | 0.8457        | 0(0-Inf)                |
| MEGALOURETER, NOS                         | 0                                       | 0          | 7                                          | 1.6655        | 0(0-Inf)                |
| MEIBOMIANITIS                             | 8                                       | 58.0963    | 199                                        | 57.4084       | 1.012(0.4981-2.0562)    |
| MELANCHOLIA (INVOLUTIONAL)                | 0                                       | 0          | 28                                         | 6.9657        | 0(0-Inf)                |
| MELANOCYTOMA, EYE                         | 0                                       | 0          | 1                                          | 0.234         | 0(0-Inf)                |
| MELANOCYTOSIS (SKIN)                      | 1                                       | 7.5864     | 7                                          | 2.311         | 3.2827(0.3979-27.0807)  |
| MELANOMA, ABDOMINAL WALL, PRIMARY         | 0                                       | 0          | 9                                          | 2.944         | 0(0-Inf)                |
| MELANOMA, AMELANOTIC, CODE ALSO BY SITE   | 0                                       | 0          | 2                                          | 2.979         | 0(0-Inf)                |
| MELANOMA, ANKLE, PRIMARY                  | 0                                       | 0          | 4                                          | 1.1701        | 0(0-Inf)                |
| MELANOMA, ANUS, PRIMARY                   | 0                                       | 0          | 1                                          | 0.3526        | 0(0-Inf)                |
| MELANOMA, ARM, PRIMARY                    | 1                                       | 7.461      | 23                                         | 7.303         | 1.0216(0.1372-7.6068)   |
| MELANOMA, AURICLE, PRIMARY                | 0                                       | 0          | 2                                          | 1.776         | 0(0-Inf)                |
| MELANOMA, BACK, PRIMARY                   | 0                                       | 0          | 36                                         | 11.5865       | 0(0-Inf)                |
| MELANOMA, BENIGN, TRUNK                   | 0                                       | 0          | 1                                          | 0.3526        | 0(0-Inf)                |
| MELANOMA, BRAIN, METASTATIC               | 0                                       | 0          | 3                                          | 0.6535        | 0(0-Inf)                |



| Description                                                          | No. of Positive Cases with Disease Code | Case Rate* | No. of Positive Controls with Disease Code | Control Rate* | Relative Risk (95%CI)   |
|----------------------------------------------------------------------|-----------------------------------------|------------|--------------------------------------------|---------------|-------------------------|
| MELANOMA, BRAIN, PRIMARY                                             | 0                                       | 0          | 1                                          | 0.2728        | 0(0-Inf)                |
| MELANOMA, BREAST, PRIMARY                                            | 0                                       | 0          | 2                                          | 0.4709        | 0(0-Inf)                |
| MELANOMA, BUTTOCK, PRIMARY                                           | 0                                       | 0          | 1                                          | 0.2729        | 0(0-Inf)                |
| MELANOMA, CANTHI, PRIMARY                                            | 0                                       | 0          | 1                                          | 0.4049        | 0(0-Inf)                |
| MELANOMA, CHEEK, PRIMARY                                             | 3                                       | 27.7484    | 16                                         | 7.113         | 3.9011(1.1242-13.5371)  |
| MELANOMA, CHEST WALL, PRIMARY                                        | 0                                       | 0          | 10                                         | 3.5297        | 0(0-Inf)                |
| MELANOMA, CHOROID, PRIMARY                                           | 1                                       | 7.024      | 9                                          | 2.4082        | 2.9167(0.3637-23.3926)  |
| MELANOMA, COLLI (PROCTO)                                             | 0                                       | 0          | 1                                          | 0.8535        | 0(0-Inf)                |
| MELANOMA, EAR, PRIMARY                                               | 0                                       | 0          | 7                                          | 3.6763        | 0(0-Inf)                |
| MELANOMA, EYE, PRIMARY                                               | 0                                       | 0          | 10                                         | 3.2466        | 0(0-Inf)                |
| MELANOMA, FACE, NEC, PRIMARY                                         | 2                                       | 21.2254    | 11                                         | 5.9874        | 3.545(0.7769-16.1757)   |
| MELANOMA, FLANK, PRIMARY                                             | 0                                       | 0          | 2                                          | 0.5458        | 0(0-Inf)                |
| MELANOMA, FOOT, PRIMARY                                              | 0                                       | 0          | 4                                          | 1.6245        | 0(0-Inf)                |
| MELANOMA, FOREARM, PRIMARY                                           | 3                                       | 34.3719    | 9                                          | 5.4427        | 6.3152(1.6897-23.6028)  |
| MELANOMA, FOREHEAD, PRIMARY                                          | 0                                       | 0          | 3                                          | 1.2108        | 0(0-Inf)                |
| MELANOMA, GROIN, PRIMARY                                             | 0                                       | 0          | 1                                          | 0.3526        | 0(0-Inf)                |
| MELANOMA, HAND, PRIMARY                                              | 0                                       | 0          | 1                                          | 0.4048        | 0(0-Inf)                |
| MELANOMA, HEEL, PRIMARY                                              | 0                                       | 0          | 1                                          | 0.2354        | 0(0-Inf)                |
| MELANOMA, IRIS, PRIMARY                                              | 0                                       | 0          | 1                                          | 0.4052        | 0(0-Inf)                |
| MELANOMA, KNEE, PRIMARY                                              | 0                                       | 0          | 1                                          | 0.2354        | 0(0-Inf)                |
| MELANOMA, LEG, PRIMARY                                               | 1                                       | 15.0884    | 14                                         | 6.0519        | 2.4932(0.3235-19.2159)  |
| MELANOMA, LIVER, METASTATIC                                          | 0                                       | 0          | 3                                          | 1.2104        | 0(0-Inf)                |
| MELANOMA, LOWER EXTREMITY, NEC, PRIMARY                              | 0                                       | 0          | 3                                          | 0.7884        | 0(0-Inf)                |
| MELANOMA, LUNG, METASTATIC                                           | 0                                       | 0          | 2                                          | 0.5907        | 0(0-Inf)                |
| MELANOMA, METASTATIC, CODE ALSO NEOPLASM MALIGNANT SECONDARY BY SITE | 1                                       | 8.8637     | 21                                         | 8.7499        | 1.013(0.1355-7.5746)    |
| MELANOMA, NEC, PRIMARY, CODE ALSO NEOPLASM MALIGNANT BY SITE         | 0                                       | 0          | 9                                          | 6.5553        | 0(0-Inf)                |
| MELANOMA, NECK, PRIMARY                                              | 1                                       | 9.9441     | 11                                         | 5.4554        | 1.8228(0.2332-14.2493)  |
| MELANOMA, NOS, PRIMARY                                               | 5                                       | 43.1008    | 138                                        | 55.2311       | 0.7804(0.3191-1.9084)   |
| MELANOMA, NOSE (EXTERNAL), PRIMARY                                   | 1                                       | 7.7837     | 2                                          | 0.6823        | 11.4077(0.997-130.5283) |
| MELANOMA, PINNA, PRIMARY                                             | 0                                       | 0          | 2                                          | 0.6309        | 0(0-Inf)                |
| MELANOMA, POPLITEAL AREA, PRIMARY                                    | 0                                       | 0          | 1                                          | 0.398         | 0(0-Inf)                |
| MELANOMA, PUBES, PRIMARY                                             | 0                                       | 0          | 1                                          | 0.3526        | 0(0-Inf)                |
| MELANOMA, RETINA, PRIMARY                                            | 0                                       | 0          | 2                                          | 0.5908        | 0(0-Inf)                |
| MELANOMA, SCALP, PRIMARY                                             | 1                                       | 10.7958    | 2                                          | 1.1276        | 9.5745(0.8478-108.1276) |
| MELANOMA, SHOULDER, PRIMARY                                          | 1                                       | 8.1416     | 9                                          | 3.3058        | 2.4628(0.3083-19.6706)  |
| MELANOMA, SWEAT GLAND, PRIMARY                                       | 0                                       | 0          | 1                                          | 0.3526        | 0(0-Inf)                |
| MELANOMA, THIGH, PRIMARY                                             | 0                                       | 0          | 5                                          | 1.1945        | 0(0-Inf)                |
| MELANOMA, TRUNK, NEC, PRIMARY                                        | 0                                       | 0          | 4                                          | 1.5027        | 0(0-Inf)                |

| Description                                             | No. of Positive Cases with Disease Code | Case Rate* | No. of Positive Controls with Disease Code | Control Rate* | Relative Risk (95%CI)  |
|---------------------------------------------------------|-----------------------------------------|------------|--------------------------------------------|---------------|------------------------|
| MELANOMA, UPPER EXTREMITY, NEC, PRIMARY                 | 0                                       | 0          | 2                                          | 0.7896        | 0(0-Inf)               |
| MELANOMA, VAGINA, PRIMARY                               | 0                                       | 0          | 1                                          | 0.234         | 0(0-Inf)               |
| MELANOMA, VULVA, PRIMARY                                | 0                                       | 0          | 1                                          | 0.234         | 0(0-Inf)               |
| MELANONYCHIA                                            | 0                                       | 0          | 1                                          | 0.4048        | 0(0-Inf)               |
| MELANOSIS, COLI                                         | 9                                       | 86.3844    | 156                                        | 73.5323       | 1.1748(0.5986-2.3055)  |
| MELANOSIS, CONJUNCTIVA, NOS                             | 1                                       | 7.0699     | 19                                         | 5.1657        | 1.3686(0.1817-10.3087) |
| MELANOSIS, NOS (SKIN#)                                  | 2                                       | 14.2566    | 35                                         | 9.9899        | 1.4271(0.3414-5.9652)  |
| MELANOSIS, OCULAR                                       | 1                                       | 7.1202     | 8                                          | 2.2674        | 3.1402(0.3865-25.5104) |
| MELANOSIS, OCULI (CONGENITAL)                           | 0                                       | 0          | 2                                          | 0.7897        | 0(0-Inf)               |
| MELANOSIS, SCLERA, NOS                                  | 0                                       | 0          | 1                                          | 0.4049        | 0(0-Inf)               |
| MELASMA, NOS                                            | 1                                       | 22.1359    | 28                                         | 14.0781       | 1.5724(0.2127-11.6211) |
| MELENA, NOS                                             | 4                                       | 39.7983    | 158                                        | 78.2835       | 0.5084(0.1882-1.3734)  |
| MELORHEOSTOSIS (BONE)                                   | 0                                       | 0          | 1                                          | 0.3526        | 0(0-Inf)               |
| MELT, CORNEA                                            | 0                                       | 0          | 1                                          | 0.853         | 0(0-Inf)               |
| MEMBRANE, BOWMAN'S                                      | 0                                       | 0          | 1                                          | 0.2729        | 0(0-Inf)               |
| MEMBRANE, CHOROIDAL (NEOVASCULAR)                       | 2                                       | 28.7446    | 72                                         | 61.4371       | 0.4679(0.1146-1.9099)  |
| MEMBRANE, CYCLITIC                                      | 0                                       | 0          | 1                                          | 0.2729        | 0(0-Inf)               |
| MEMBRANE, DESCEMET'S                                    | 2                                       | 16.6621    | 28                                         | 10.5227       | 1.5834(0.3747-6.6922)  |
| MEMBRANE, EPIRETINAL                                    | 14                                      | 136.9094   | 583                                        | 283.8773      | 0.4823(0.2836-0.8201)  |
| MEMBRANE, PAPILLARY, PERSISTENT                         | 0                                       | 0          | 1                                          | 0.8528        | 0(0-Inf)               |
| MEMBRANE, PRERETINAL                                    | 4                                       | 32.9085    | 107                                        | 39.4045       | 0.8351(0.307-2.2718)   |
| MEMBRANE, PUPILLARY, NOS                                | 0                                       | 0          | 4                                          | 1.0355        | 0(0-Inf)               |
| MEMBRANE, SECONDARY, EYE (AFTER CATARACT)               | 25                                      | 275.3716   | 416                                        | 230.4892      | 1.1947(0.797-1.791)    |
| MEMBRANE, SUBRETINAL, NEOVASCULAR                       | 4                                       | 51.223     | 147                                        | 106.9856      | 0.4788(0.1771-1.2943)  |
| MENINGIOMA, MENINGOTHELIOMATOUS, NOS CODE ALSO          |                                         |            |                                            |               |                        |
| NEOPLASM BENIGN BY SITE                                 | 0                                       | 0          | 6                                          | 1.6039        | 0(0-Inf)               |
| MENINGIOMA, NOS, CODE ALSO NEOPLASM, BENIGN BY SITE     | 5                                       | 39.6115    | 89                                         | 30.5545       | 1.2964(0.5247-3.2034)  |
| MENINGIOMA, PSAMMOMA, NOS, CODE ALSO NEO BENIGN BY SITE | 0                                       | 0          | 1                                          | 0.2354        | 0(0-Inf)               |
| MENINGITIS, ASEPTIC, NOS                                | 0                                       | 0          | 14                                         | 3.5906        | 0(0-Inf)               |
| MENINGITIS, CRYPTOCOCCAL                                | 0                                       | 0          | 3                                          | 1.3872        | 0(0-Inf)               |
| MENINGITIS, H. INFLUENZAE                               | 0                                       | 0          | 1                                          | 0.2354        | 0(0-Inf)               |
| MENINGITIS, LATE EFFECT                                 | 0                                       | 0          | 3                                          | 1.1479        | 0(0-Inf)               |
| MENINGITIS, LYMPHOCYTIC                                 | 0                                       | 0          | 1                                          | 0.2729        | 0(0-Inf)               |
| MENINGITIS, NOS                                         | 0                                       | 0          | 9                                          | 3.0029        | 0(0-Inf)               |
| MENINGITIS, PNEUMOCOCCAL                                | 0                                       | 0          | 2                                          | 0.5709        | 0(0-Inf)               |
| MENINGITIS, STREPTOCOCCAL                               | 0                                       | 0          | 2                                          | 0.7052        | 0(0-Inf)               |
| MENINGITIS, VIRAL, SEE ALSO MENINGITIS, ASEPTIC         | 1                                       | 8.4796     | 7                                          | 1.8679        | 4.5397(0.5495-37.5059) |
| MENINGOCELE, NOS (SPINAL/CONGENITAL)                    | 0                                       | 0          | 4                                          | 1.1819        | 0(0-Inf)               |
| MENINGOCOCCEMIA                                         | 0                                       | 0          | 1                                          | 0.2354        | 0(0-Inf)               |

| Description                                                    | No. of Positive Cases with Disease Code | Case Rate* | No. of Positive Controls with Disease Code | Control Rate* | Relative Risk (95%CI)    |
|----------------------------------------------------------------|-----------------------------------------|------------|--------------------------------------------|---------------|--------------------------|
| MENINGOENCEPHALITIS, NOS, SEE ALSO MENINGITIS                  | 0                                       | 0          | 5                                          | 2.0028        | 0(0-Inf)                 |
| MENINGOENCEPHALOCELE                                           | 0                                       | 0          | 1                                          | 0.4048        | 0(0-Inf)                 |
| MENINGOMYELOCELE, NOS (CONGENITAL)                             | 0                                       | 0          | 1                                          | 0.4048        | 0(0-Inf)                 |
| MENOMETRORRHAGIA, NOS                                          | 13                                      | 555.4583   | 783                                        | 622.7678      | 0.8919(0.5153-1.5437)    |
| MENOMETRORRHAGIA, PERSISTENT                                   | 1                                       | 42.6323    | 35                                         | 26.5685       | 1.6046(0.2193-11.7385)   |
| MENOMETRORRHAGIA, RECURRENT                                    | 3                                       | 134.4973   | 96                                         | 74.8337       | 1.7973(0.5687-5.6799)    |
| MENOPAUSE, ARTIFICIAL                                          | 3                                       | 70.2452    | 64                                         | 33.2461       | 2.1129(0.6612-6.7522)    |
| MENOPAUSE, DELAYED                                             | 0                                       | 0          | 1                                          | 0.234         | 0(0-Inf)                 |
| MENOPAUSE, EARLY                                               | 1                                       | 34.8902    | 51                                         | 33.9153       | 1.0287(0.1419-7.46)      |
| MENOPAUSE, NOS                                                 | 38                                      | 669.9549   | 1466                                       | 693.4303      | 0.9661(0.6995-1.3344)    |
| MENOPAUSE, PREMATURE                                           | 0                                       | 0          | 31                                         | 17.0886       | 0(0-Inf)                 |
| MENOPAUSE, SYMPTOMS                                            | 12                                      | 275.8273   | 655                                        | 343.7214      | 0.8025(0.453-1.4217)     |
| MENORRHAGIA, DUE TO CONTRACEPTIVE DEVICE                       | 0                                       | 0          | 1                                          | 0.398         | 0(0-Inf)                 |
| MENORRHAGIA, MENOPAUSAL                                        | 0                                       | 0          | 3                                          | 0.6548        | 0(0-Inf)                 |
| MENORRHAGIA, NOS                                               | 8                                       | 361.4261   | 659                                        | 542.4895      | 0.6662(0.3316-1.3384)    |
| MENORRHEA, NOS                                                 | 0                                       | 0          | 11                                         | 4.781         | 0(0-Inf)                 |
| MERALGIA PARESTHETICA                                          | 12                                      | 84.5859    | 213                                        | 53.4567       | 1.5823(0.8825-2.8372)    |
| MESENTERITIS (RETRACTILE)                                      | 0                                       | 0          | 1                                          | 2.4855        | 0(0-Inf)                 |
| MESOTHELIOMA, MALIGNANT, CODE ALSO NEOPLASM, MALIGNANT BY SITE | 1                                       | 9.4921     | 11                                         | 5.0771        | 1.8696(0.2391-14.6185)   |
| MESOTHELIOMA, NOS, CODE ALSO NEOPLASM, BENIGN BY SITE          | 1                                       | 12.1556    | 8                                          | 5.2504        | 2.3152(0.2867-18.6942)   |
| METAPLASIA, BLADDER                                            | 2                                       | 13.9451    | 39                                         | 9.0625        | 1.5388(0.3691-6.4145)    |
| METAPLASIA, BREAST, (APOCRINE)                                 | 2                                       | 31.7613    | 104                                        | 45.4329       | 0.6991(0.1721-2.8397)    |
| METAPLASIA, BRONCHUS (SQUAMOUS)                                | 0                                       | 0          | 10                                         | 3.1521        | 0(0-Inf)                 |
| METAPLASIA, CERVIX, NOS                                        | 0                                       | 0          | 18                                         | 9.6527        | 0(0-Inf)                 |
| METAPLASIA, CERVIX, SQUAMOUS                                   | 8                                       | 181.2742   | 313                                        | 160.7214      | 1.1279(0.5583-2.2786)    |
| METAPLASIA, COLORECTAL/RECTOSIGMOID (JUNCTION)                 | 0                                       | 0          | 1                                          | 0.8882        | 0(0-Inf)                 |
| METAPLASIA, ENDOMETRIUM                                        | 2                                       | 31.6511    | 73                                         | 31.7932       | 0.9955(0.2434-4.0715)    |
| METAPLASIA, ESOPHAGUS                                          | 0                                       | 0          | 9                                          | 2.6967        | 0(0-Inf)                 |
| METAPLASIA, GASTRIC                                            | 1                                       | 10.4787    | 6                                          | 3.2457        | 3.2285(0.3825-27.2483)   |
| METAPLASIA, INTESTINAL, OF GASTRIC MUCOSA                      | 12                                      | 105.9886   | 134                                        | 55.031        | 1.926(1.0639-3.4867)     |
| METAPLASIA, MYELOID, NOS--AMM                                  | 0                                       | 0          | 9                                          | 3.4444        | 0(0-Inf)                 |
| METAPLASIA, MYELOID, POST POLYCYTHEMIC                         | 0                                       | 0          | 1                                          | 0.2729        | 0(0-Inf)                 |
| METAPLASIA, PROSTATE                                           | 1                                       | 6.8612     | 2                                          | 0.552         | 12.4289(1.0943-141.1704) |
| METAPLASIA, PROSTATE, SQUAMOUS CELL-DELETE #-CODE 02372111     | 0                                       | 0          | 5                                          | 1.4139        | 0(0-Inf)                 |
| METAPLASIA, SQUAMOUS (PROCTO)                                  | 0                                       | 0          | 2                                          | 0.4854        | 0(0-Inf)                 |
| METAPLASIA, URETHRA                                            | 0                                       | 0          | 1                                          | 0.234         | 0(0-Inf)                 |
| METAPLASIA, VAGINAL, SQUAMOUS CELL                             | 0                                       | 0          | 2                                          | 0.4681        | 0(0-Inf)                 |
| METATARSALGIA, NOS                                             | 34                                      | 242.8926   | 1117                                       | 283.9151      | 0.8555(0.6077-1.2045)    |

| Description                           | No. of Positive Cases with Disease Code | Case Rate* | No. of Positive Controls with Disease Code | Control Rate* | Relative Risk (95%CI)   |
|---------------------------------------|-----------------------------------------|------------|--------------------------------------------|---------------|-------------------------|
| METATARSUS, ADDUCTUS                  | 0                                       | 0          | 5                                          | 1.1527        | 0(0-Inf)                |
| METATARSUS, PRIMUS BREVIS             | 0                                       | 0          | 4                                          | 0.8642        | 0(0-Inf)                |
| METATARSUS, PRIMUS VARUS              | 1                                       | 6.9443     | 13                                         | 3.0425        | 2.2824(0.2946-17.6845)  |
| METATARSUS, VARUS                     | 0                                       | 0          | 11                                         | 2.6965        | 0(0-Inf)                |
| METHEMOGLOBINEMIA                     | 0                                       | 0          | 4                                          | 1.0139        | 0(0-Inf)                |
| METRORRHAGIA, CHRONIC                 | 0                                       | 0          | 2                                          | 0.7961        | 0(0-Inf)                |
| METRORRHAGIA, NOS                     | 6                                       | 251.0602   | 280                                        | 211.2859      | 1.1882(0.5289-2.6697)   |
| METRORRHAGIA, RECURRENT               | 0                                       | 0          | 8                                          | 3.7945        | 0(0-Inf)                |
| MICROANEURYSM (RETINAL)               | 3                                       | 34.4378    | 12                                         | 7.2947        | 4.7209(1.3177-16.9135)  |
| MICROANGIOPATHY, NOS                  | 0                                       | 0          | 1                                          | 0.3526        | 0(0-Inf)                |
| MICROANGIOPATHY, THROMBOTIC           | 0                                       | 0          | 1                                          | 0.234         | 0(0-Inf)                |
| MICROCEPHALY, NOS                     | 0                                       | 0          | 1                                          | 0.398         | 0(0-Inf)                |
| MICROCORNEA                           | 0                                       | 0          | 1                                          | 0.2729        | 0(0-Inf)                |
| MICROCYST (COGAN'S)-EYE               | 0                                       | 0          | 2                                          | 0.6776        | 0(0-Inf)                |
| MICROCYTIC INDICES                    | 0                                       | 0          | 4                                          | 1.322         | 0(0-Inf)                |
| MICROCYTOSIS                          | 2                                       | 14.3029    | 58                                         | 16.2564       | 0.8798(0.2141-3.616)    |
| MICROGNATHIA                          | 0                                       | 0          | 3                                          | 0.8034        | 0(0-Inf)                |
| MICROPTHALMOS, CONGENITAL             | 0                                       | 0          | 4                                          | 1.3087        | 0(0-Inf)                |
| MICROPTHALMOS, WITH OTHER EYE ANOMALY | 0                                       | 0          | 2                                          | 0.6309        | 0(0-Inf)                |
| MICROTIA (EAR)                        | 0                                       | 0          | 1                                          | 0.3526        | 0(0-Inf)                |
| MICROTROPIA                           | 0                                       | 0          | 4                                          | 1.3629        | 0(0-Inf)                |
| MIGRAINE, ABDOMINAL                   | 0                                       | 0          | 2                                          | 0.4854        | 0(0-Inf)                |
| MIGRAINE, CATAMENIAL (MENSES)         | 0                                       | 0          | 5                                          | 1.2605        | 0(0-Inf)                |
| MIGRAINE, CLASSIC (AURA)              | 3                                       | 22.2405    | 106                                        | 24.1741       | 0.92(0.2912-2.907)      |
| MIGRAINE, COMMON                      | 4                                       | 38.6996    | 98                                         | 24.3038       | 1.5923(0.5839-4.3425)   |
| MIGRAINE, EQUIVALENT                  | 11                                      | 77.9005    | 315                                        | 75.8441       | 1.0271(0.562-1.8771)    |
| MIGRAINE, HEMIPLEGIC                  | 0                                       | 0          | 1                                          | 0.234         | 0(0-Inf)                |
| MIGRAINE, NOS                         | 16                                      | 114.1659   | 529                                        | 124.0493      | 0.9203(0.5589-1.5155)   |
| MIGRAINE, OCULAR (SCOTOMA)            | 2                                       | 14.1398    | 169                                        | 45.8522       | 0.3084(0.0764-1.245)    |
| MIGRAINE, OPHTHALMOPLEGIC             | 2                                       | 15.2241    | 57                                         | 18.0958       | 0.8413(0.2046-3.4591)   |
| MIGRAINE, SUSPECT                     | 3                                       | 20.8384    | 60                                         | 15.108        | 1.3793(0.4305-4.419)    |
| MIGRAINE, VARIANT                     | 0                                       | 0          | 8                                          | 2.1736        | 0(0-Inf)                |
| MIGRAINE, VASCULAR                    | 0                                       | 0          | 2                                          | 0.7896        | 0(0-Inf)                |
| MIGRAINE, VERTEBROBASILAR             | 0                                       | 0          | 1                                          | 0.8533        | 0(0-Inf)                |
| MILIA, COLLOID                        | 0                                       | 0          | 2                                          | 0.5709        | 0(0-Inf)                |
| MILIA, NOS                            | 23                                      | 167.1971   | 581                                        | 162.8098      | 1.0269(0.676-1.56)      |
| MILIARIA, NOS                         | 0                                       | 0          | 12                                         | 3.0056        | 0(0-Inf)                |
| MILIARIA, RUBRA                       | 2                                       | 14.9506    | 12                                         | 2.7165        | 5.5037(1.2102-25.0298)  |
| MILIUM, COLLOID                       | 1                                       | 10.0429    | 1                                          | 0.2717        | 36.9591(2.1869-624.604) |
| MILIUM, NOS                           | 6                                       | 43.0168    | 219                                        | 61.0927       | 0.7041(0.3123-1.5876)   |

| Description                              | No. of Positive Cases with Disease Code | Case Rate* | No. of Positive Controls with Disease Code | Control Rate* | Relative Risk (95%CI)    |
|------------------------------------------|-----------------------------------------|------------|--------------------------------------------|---------------|--------------------------|
| MILK OF CALCIUM BILE                     | 0                                       | 0          | 1                                          | 0.4048        | 0(0-Inf)                 |
| MIOSIS, NOS                              | 1                                       | 11.0307    | 17                                         | 10.0638       | 1.0961(0.145-8.2875)     |
| MIOSIS, NOT DUE TO MIOTICS               | 0                                       | 0          | 1                                          | 0.8528        | 0(0-Inf)                 |
| MITTELSCHMERZ                            | 0                                       | 0          | 14                                         | 16.8424       | 0(0-Inf)                 |
| MOBILE, CECUM                            | 0                                       | 0          | 2                                          | 0.5909        | 0(0-Inf)                 |
| MOBILE, COCCYX                           | 0                                       | 0          | 1                                          | 0.234         | 0(0-Inf)                 |
| MOBILE, TOOTH                            | 3                                       | 23.0344    | 82                                         | 26.7503       | 0.8611(0.2712-2.7337)    |
| MOLE, FLESHY                             | 0                                       | 0          | 7                                          | 1.8972        | 0(0-Inf)                 |
| MOLE, HEMORRHAGIC                        | 0                                       | 0          | 2                                          | 0.5709        | 0(0-Inf)                 |
| MOLE, MALIGNANT, NOS, SEE ALSO MELANOMA  | 0                                       | 0          | 1                                          | 0.398         | 0(0-Inf)                 |
| MOLE, NOS (DERM#)                        | 5                                       | 34.9833    | 316                                        | 82.5283       | 0.4239(0.175-1.0266)     |
| MOLLUSCUM CONTAGIOSUM                    | 1                                       | 8.9001     | 30                                         | 7.5104        | 1.185(0.1607-8.7379)     |
| MONILIASIS, CUTANEOUS                    | 9                                       | 77.4677    | 215                                        | 84.8915       | 0.9125(0.4676-1.7811)    |
| MONILIASIS, GENITOURINARY SYSTEM         | 16                                      | 111.9382   | 400                                        | 98.568        | 1.1356(0.6878-1.8752)    |
| MONILIASIS, MOUTH                        | 5                                       | 50.0483    | 193                                        | 96.9832       | 0.5161(0.2121-1.2556)    |
| MONILIASIS, NOS                          | 4                                       | 28.3228    | 63                                         | 14.7053       | 1.926(0.6973-5.3199)     |
| MONILIASIS, SEPTICEMIC                   | 0                                       | 0          | 1                                          | 0.234         | 0(0-Inf)                 |
| MONILIASIS, SYSTEMIC                     | 0                                       | 0          | 2                                          | 0.7897        | 0(0-Inf)                 |
| MONILIASIS, VAGINA                       | 6                                       | 85.7747    | 223                                        | 98.6861       | 0.8692(0.3855-1.9597)    |
| MONOCLONAL PROTEIN (IGA)(IGG)            | 29                                      | 269.281    | 12                                         | 5.208         | 51.7051(26.135-102.2925) |
| MONOCYTOSIS                              | 1                                       | 7.9135     | 8                                          | 2.7735        | 2.8533(0.3517-23.1476)   |
| MONONEURITIS, MULTIPLEX                  | 0                                       | 0          | 4                                          | 0.9237        | 0(0-Inf)                 |
| MONONEURITIS, NOS                        | 0                                       | 0          | 5                                          | 1.3506        | 0(0-Inf)                 |
| MONONEUROPATHY, MULTIPLEX                | 0                                       | 0          | 5                                          | 1.6797        | 0(0-Inf)                 |
| MONONEUROPATHY, NOS, SEE ALSO NEUROPATHY | 0                                       | 0          | 2                                          | 0.7896        | 0(0-Inf)                 |
| MONONUCLEOSIS, INFECTIOUS, NOS           | 0                                       | 0          | 26                                         | 8.2502        | 0(0-Inf)                 |
| MONOPLÉGIA, NOS                          | 0                                       | 0          | 5                                          | 1.7339        | 0(0-Inf)                 |
| MONOSCLEROSIS (CNS)                      | 0                                       | 0          | 1                                          | 0.3527        | 0(0-Inf)                 |
| MOOD SWINGS                              | 7                                       | 55.2889    | 103                                        | 35.3446       | 1.5643(0.7247-3.3765)    |
| MORPHEA, NOS                             | 0                                       | 0          | 17                                         | 3.8545        | 0(0-Inf)                 |
| MORPHEA, PROFUNDA                        | 0                                       | 0          | 2                                          | 0.4709        | 0(0-Inf)                 |
| MORTON'S TOE                             | 1                                       | 8.039      | 19                                         | 4.4034        | 1.8256(0.2422-13.7616)   |
| MOSAICISM, NOS (ABNORMAL CHROMOSOME #)   | 0                                       | 0          | 1                                          | 0.8881        | 0(0-Inf)                 |
| MOTTLED, MACULA                          | 0                                       | 0          | 5                                          | 1.3909        | 0(0-Inf)                 |
| MOUTH BREATHING                          | 0                                       | 0          | 10                                         | 2.6141        | 0(0-Inf)                 |
| MUCINOSIS, DERMAL                        | 1                                       | 6.9341     | 30                                         | 7.5368        | 0.92(0.1248-6.7832)      |
| MUCINOSIS, FOLLICULAR                    | 0                                       | 0          | 3                                          | 2.0477        | 0(0-Inf)                 |
| MUCOCELE, APPENDIX                       | 0                                       | 0          | 5                                          | 1.1872        | 0(0-Inf)                 |
| MUCOCELE, BUCCAL CAVITY                  | 2                                       | 13.9317    | 26                                         | 6.7654        | 2.0593(0.4849-8.7459)    |
| MUCOCELE, GALLBLADDER                    | 0                                       | 0          | 1                                          | 0.234         | 0(0-Inf)                 |

| Description                                           | No. of Positive Cases with Disease Code | Case Rate* | No. of Positive Controls with Disease Code | Control Rate* | Relative Risk (95%CI)    |
|-------------------------------------------------------|-----------------------------------------|------------|--------------------------------------------|---------------|--------------------------|
| MUCOCELE, LIP                                         | 0                                       | 0          | 22                                         | 8.2838        | 0(0-Inf)                 |
| MUCOCELE, NOS                                         | 0                                       | 0          | 17                                         | 4.5963        | 0(0-Inf)                 |
| MUCOCELE, NOSE                                        | 0                                       | 0          | 1                                          | 1.037         | 0(0-Inf)                 |
| MUCOCELE, SALIVARY GLAND                              | 0                                       | 0          | 1                                          | 0.3526        | 0(0-Inf)                 |
| MUCOCELE, SINUS                                       | 0                                       | 0          | 10                                         | 2.3091        | 0(0-Inf)                 |
| MUCOCOLPOS                                            | 0                                       | 0          | 1                                          | 0.4049        | 0(0-Inf)                 |
| MUCORMYCOSIS                                          | 0                                       | 0          | 1                                          | 0.3526        | 0(0-Inf)                 |
| MUCOSITIS, ESOPHAGUS                                  | 0                                       | 0          | 2                                          | 0.4853        | 0(0-Inf)                 |
| MUCOSITIS, GENITAL, MALE, NEC / NOS                   | 0                                       | 0          | 1                                          | 0.2729        | 0(0-Inf)                 |
| MUCOSITIS, MOUTH                                      | 0                                       | 0          | 33                                         | 13.0066       | 0(0-Inf)                 |
| MUCOSITIS, SMALL INTESTINE                            | 0                                       | 0          | 1                                          | 0.8527        | 0(0-Inf)                 |
| MUCOSITIS, TONGUE                                     | 1                                       | 7.2329     | 2                                          | 0.5748        | 12.5825(1.0888-145.4022) |
| MUCOSITIS, UPPER RESPIRATORY, NOS                     | 2                                       | 18.1851    | 16                                         | 6.9156        | 2.6296(0.5989-11.545)    |
| MUCUS PLUG (TRACHEOBRONCHIAL)                         | 2                                       | 17.0612    | 32                                         | 12.4844       | 1.3666(0.3257-5.7333)    |
| MULTIPARITY                                           | 0                                       | 0          | 35                                         | 31.5507       | 0(0-Inf)                 |
| MUMPS, COMPLICATED                                    | 0                                       | 0          | 1                                          | 0.8877        | 0(0-Inf)                 |
| MUMPS, NOS                                            | 0                                       | 0          | 2                                          | 0.5459        | 0(0-Inf)                 |
| MURMUR, AORTIC                                        | 3                                       | 23.829     | 105                                        | 36.408        | 0.6545(0.2072-2.0671)    |
| MURMUR, DIASTOLIC                                     | 1                                       | 10.1784    | 7                                          | 3.5858        | 2.8385(0.3444-23.3934)   |
| MURMUR, HEART, FUNCTIONAL                             | 1                                       | 17.0034    | 35                                         | 12.0151       | 1.4152(0.1932-10.3662)   |
| MURMUR, HEART, INNOCENT                               | 2                                       | 13.9152    | 13                                         | 3.4294        | 4.0576(0.903-18.2322)    |
| MURMUR, HEART, INSIGNIFICANT                          | 0                                       | 0          | 1                                          | 0.234         | 0(0-Inf)                 |
| MURMUR, HEART, NOS                                    | 16                                      | 121.6065   | 474                                        | 149.3453      | 0.8143(0.4941-1.3418)    |
| MURMUR, NONORGANIC, PULMONIC VALVE                    | 0                                       | 0          | 2                                          | 0.4709        | 0(0-Inf)                 |
| MURMUR, NOS (NOT HEART)                               | 0                                       | 0          | 1                                          | 0.234         | 0(0-Inf)                 |
| MURMUR, PULMONARY INSUFFICIENCY                       | 0                                       | 0          | 11                                         | 3.8431        | 0(0-Inf)                 |
| MURMUR, SYSTOLIC (UNSPECIFIED)                        | 10                                      | 70.0573    | 225                                        | 56.7182       | 1.2352(0.6541-2.3325)    |
| MUTILATIONS ARTHRITIS                                 | 0                                       | 0          | 1                                          | 0.4048        | 0(0-Inf)                 |
| MUTISM, NOS                                           | 0                                       | 0          | 1                                          | 0.4751        | 0(0-Inf)                 |
| MYALGIA, BACK--MYLB                                   | 55                                      | 404.1842   | 1589                                       | 397.9759      | 1.0156(0.7756-1.3299)    |
| MYALGIA, CHEST WALL                                   | 12                                      | 95.7704    | 372                                        | 129.193       | 0.7413(0.4167-1.3189)    |
| MYALGIA, INTERCOSTAL                                  | 10                                      | 88.6837    | 461                                        | 118.6177      | 0.7476(0.3991-1.4004)    |
| MYALGIA, LOWER EXTREMITY--MYLL                        | 25                                      | 178.5717   | 707                                        | 180.0295      | 0.9919(0.6648-1.4799)    |
| MYALGIA, NECK--MYLN                                   | 48                                      | 363.052    | 1464                                       | 359.165       | 1.0108(0.7577-1.3486)    |
| MYALGIA, NOS--MYAL (CODE ALSO PAIN BY SITE SPECIFIED) | 61                                      | 460.2005   | 1828                                       | 460.2165      | 1(0.7742-1.2915)         |
| MYALGIA, SCAPULA                                      | 1                                       | 7.5424     | 29                                         | 9.0865        | 0.8301(0.1125-6.1269)    |
| MYALGIA, TRAPEZIUS                                    | 1                                       | 7.0383     | 162                                        | 43.0944       | 0.1633(0.0228-1.1678)    |
| MYALGIA, UPPER EXTREMITY--MYLU                        | 24                                      | 181.2463   | 897                                        | 215.8759      | 0.8396(0.5592-1.2605)    |
| MYASTHENIA, GRAVIS                                    | 1                                       | 7.4924     | 18                                         | 5.6333        | 1.33(0.1762-10.0408)     |
| MYASTHENIA, NOS                                       | 1                                       | 7.5846     | 2                                          | 0.4321        | 17.5534(1.5086-204.2372) |

| Description                                                    | No. of Positive Cases with Disease Code | Case Rate* | No. of Positive Controls with Disease Code | Control Rate* | Relative Risk (95%CI)    |
|----------------------------------------------------------------|-----------------------------------------|------------|--------------------------------------------|---------------|--------------------------|
| MYASTHENIA, OCULAR                                             | 0                                       | 0          | 5                                          | 2.2768        | 0(0-Inf)                 |
| MYCETOMA, MADUROMYCOTIC (FUNGUS CAUSED)                        | 0                                       | 0          | 4                                          | 1.3221        | 0(0-Inf)                 |
| MYCOSIS, FUNGOIDES (MALIGNANT)                                 | 0                                       | 0          | 4                                          | 1.1699        | 0(0-Inf)                 |
| MYCOSIS, NAIL, NOS                                             | 7                                       | 75.6459    | 118                                        | 66.5436       | 1.1368(0.5291-2.4425)    |
| MYCOSIS, NOS (SYSTEMIC #)                                      | 0                                       | 0          | 25                                         | 7.4327        | 0(0-Inf)                 |
| MYCOTIC HYPERTROPHIC NAILS                                     | 31                                      | 390.4308   | 521                                        | 357.4133      | 1.0924(0.7596-1.5709)    |
| MYCOTOXICOSIS, NOS                                             | 0                                       | 0          | 1                                          | 0.8878        | 0(0-Inf)                 |
| MYDRIASIS, NOS                                                 | 0                                       | 0          | 7                                          | 1.8262        | 0(0-Inf)                 |
| MYELINATED NERVE FIBERS EYE                                    | 2                                       | 14.0074    | 31                                         | 8.5287        | 1.6424(0.3907-6.9033)    |
| MYELINOLYSIS (CNS)                                             | 0                                       | 0          | 1                                          | 0.2729        | 0(0-Inf)                 |
| MYELITIS, LATE EFFECT                                          | 0                                       | 0          | 1                                          | 0.2729        | 0(0-Inf)                 |
| MYELITIS, NOS                                                  | 0                                       | 0          | 7                                          | 1.5774        | 0(0-Inf)                 |
| MYELITIS, TRANSVERSE (TRAUMATIC)                               | 0                                       | 0          | 7                                          | 2.5586        | 0(0-Inf)                 |
| MYELOYDYSPLASIA, BLOOD DISORDER                                | 2                                       | 26.9443    | 27                                         | 20.6185       | 1.3068(0.3094-5.5187)    |
| MYELOYDYSPLASIA, SPINAL CORD                                   | 0                                       | 0          | 3                                          | 1.2144        | 0(0-Inf)                 |
| MYELOFIBROSIS                                                  | 0                                       | 0          | 11                                         | 5.0981        | 0(0-Inf)                 |
| MYELOLIPOMA--CODE ALSO LIPOMA BY SITE                          | 0                                       | 0          | 1                                          | 1.036         | 0(0-Inf)                 |
| MYELOMA, METASTATIC                                            | 0                                       | 0          | 1                                          | 0.2729        | 0(0-Inf)                 |
| MYELOMA, MULTIPLE                                              | 25                                      | 226.7578   | 16                                         | 6.8727        | 32.9938(17.4465-62.396)  |
| MYELOMA, MULTIPLE, IN REMISSION                                | 1                                       | 9.9221     | 1                                          | 0.494         | 20.0853(1.2005-336.0578) |
| MYELOMA, MULTIPLE, RECURRENT                                   | 2                                       | 14.2284    | 0                                          | 0             | 4294167044.2642(0-Inf)   |
| MYELOMA, NOS                                                   | 13                                      | 114.1703   | 9                                          | 3.7079        | 30.7914(12.9859-73.011)  |
| MYELOMALACIA                                                   | 0                                       | 0          | 2                                          | 1.1972        | 0(0-Inf)                 |
| MYELOPATHY, CERVICAL                                           | 5                                       | 39.2481    | 85                                         | 29.0128       | 1.3528(0.5471-3.3452)    |
| MYELOPATHY, ISCHEMIC                                           | 0                                       | 0          | 1                                          | 0.3526        | 0(0-Inf)                 |
| MYELOPATHY, LUMBAR                                             | 1                                       | 9.471      | 2                                          | 0.9255        | 10.2332(0.8938-117.1591) |
| MYELOPATHY, NOS                                                | 5                                       | 37.8639    | 36                                         | 11.7013       | 3.2359(1.2612-8.3026)    |
| MYELOPATHY, THORACIC                                           | 1                                       | 8.1478     | 14                                         | 5.1072        | 1.5953(0.2079-12.2398)   |
| MYELOPATHY, TRANSVERSE                                         | 0                                       | 0          | 1                                          | 0.234         | 0(0-Inf)                 |
| MYELORADICULOPATHY                                             | 1                                       | 14.6183    | 2                                          | 1.6886        | 8.6571(0.7673-97.6755)   |
| MYELOSUPPRESSION                                               | 0                                       | 0          | 1                                          | 0.4048        | 0(0-Inf)                 |
| MYOBLASTOMA, GRANULAR CELL, CODE ALSO NEOPLASM, BENIGN BY SITE | 0                                       | 0          | 2                                          | 0.4681        | 0(0-Inf)                 |
| MYOCARDIOPATHY SEE ALSO CARDIOMYOPATHY                         | 0                                       | 0          | 1                                          | 0.234         | 0(0-Inf)                 |
| MYOCARDITIS, LYMPHOCYTIC/PLASMACYTIC                           | 0                                       | 0          | 3                                          | 0.7175        | 0(0-Inf)                 |
| MYOCARDITIS, NOS                                               | 0                                       | 0          | 10                                         | 2.3201        | 0(0-Inf)                 |
| MYOCARDITIS, RHEUMATIC                                         | 0                                       | 0          | 1                                          | 0.4751        | 0(0-Inf)                 |
| MYOCARDITIS, VIRAL                                             | 0                                       | 0          | 2                                          | 0.4709        | 0(0-Inf)                 |
| MYOCLONUS, FAMILIAL                                            | 0                                       | 0          | 1                                          | 0.398         | 0(0-Inf)                 |
| MYOCLONUS, NOS                                                 | 0                                       | 0          | 88                                         | 38.296        | 0(0-Inf)                 |

| Description                                                         | No. of Positive Cases with Disease Code | Case Rate* | No. of Positive Controls with Disease Code | Control Rate* | Relative Risk (95%CI)   |
|---------------------------------------------------------------------|-----------------------------------------|------------|--------------------------------------------|---------------|-------------------------|
| MYOCLONUS, PALATAL                                                  | 0                                       | 0          | 3                                          | 0.9609        | 0(0-Inf)                |
| MYOFASCITIS, LOW BACK                                               | 1                                       | 7.7784     | 0                                          | 0             | 17346039946.8321(0-Inf) |
| MYOFASCITIS, NOS                                                    | 0                                       | 0          | 27                                         | 6.2308        | 0(0-Inf)                |
| MYOGENIC BLADDER                                                    | 1                                       | 8.491      | 8                                          | 3.0985        | 2.7403(0.3376-22.2453)  |
| MYOGLOBINURIA                                                       | 0                                       | 0          | 1                                          | 0.398         | 0(0-Inf)                |
| MYOHYPERTROPHY (UTERUS)                                             | 0                                       | 0          | 2                                          | 0.432         | 0(0-Inf)                |
| MYOKYMIA, NOS                                                       | 1                                       | 7.1015     | 15                                         | 3.4619        | 2.0513(0.2679-15.7087)  |
| MYOKYMIA, ORBICULARIS OCULI                                         | 0                                       | 0          | 2                                          | 0.5069        | 0(0-Inf)                |
| MYOKYMIA, SUPERIOR OBLIQUE                                          | 0                                       | 0          | 3                                          | 0.8018        | 0(0-Inf)                |
| MYOMA, NOS (PELVIC)                                                 | 0                                       | 0          | 2                                          | 0.432         | 0(0-Inf)                |
| MYOMA, NOS, CODE ALSO NEO BENIGN BY SITE                            | 0                                       | 0          | 1                                          | 0.2354        | 0(0-Inf)                |
| MYOMA, UTERUS                                                       | 1                                       | 31.3968    | 98                                         | 60.951        | 0.5151(0.0718-3.6979)   |
| MYOPATHY, CONGENITAL                                                | 0                                       | 0          | 2                                          | 0.5069        | 0(0-Inf)                |
| MYOPATHY, EXTRAOCULAR                                               | 0                                       | 0          | 1                                          | 0.4049        | 0(0-Inf)                |
| MYOPATHY, NOS                                                       | 8                                       | 66.004     | 93                                         | 34.1754       | 1.9313(0.9345-3.9914)   |
| MYOPATHY, STEROID (INDUCED) (CODE ALSO EFFECT, ADVERSE STEROID NEC) | 2                                       | 20.4499    | 27                                         | 13.9266       | 1.4684(0.3474-6.2065)   |
| MYOPERICARDITIS, NOS                                                | 0                                       | 0          | 1                                          | 0.234         | 0(0-Inf)                |
| MYOPIA, HIGH                                                        | 6                                       | 42.1382    | 84                                         | 20.3          | 2.0758(0.9026-4.7739)   |
| MYOPIA, NOS--MYO                                                    | 68                                      | 660.2527   | 2633                                       | 748.2721      | 0.8824(0.6932-1.1231)   |
| MYOPIA, PROGRESSIVE                                                 | 0                                       | 0          | 2                                          | 0.5069        | 0(0-Inf)                |
| MYOPIA, WITH ASTIGMATISM                                            | 0                                       | 0          | 5                                          | 1.526         | 0(0-Inf)                |
| MYOSARCOMA CODE ALSO NEOPLASM MALIGNANT BY SITE                     | 0                                       | 0          | 1                                          | 0.234         | 0(0-Inf)                |
| MYOSIS, NOS                                                         | 0                                       | 0          | 1                                          | 2.4859        | 0(0-Inf)                |
| MYOSITIS, INCLUSION BODY                                            | 0                                       | 0          | 3                                          | 1.148         | 0(0-Inf)                |
| MYOSITIS, NOS                                                       | 3                                       | 24.1511    | 201                                        | 47.4373       | 0.5091(0.1626-1.5944)   |
| MYOSITIS, ORBITAL                                                   | 0                                       | 0          | 2                                          | 0.432         | 0(0-Inf)                |
| MYOSITIS, OSSIFICANS                                                | 0                                       | 0          | 5                                          | 1.3368        | 0(0-Inf)                |
| MYOSITIS, OSSIFICANS, LOWER EXTREMITY                               | 0                                       | 0          | 1                                          | 0.4049        | 0(0-Inf)                |
| MYOSITIS, OSSIFICANS, UPPER EXTREMITY                               | 0                                       | 0          | 2                                          | 0.6774        | 0(0-Inf)                |
| MYOTONIA, CONGENITA                                                 | 0                                       | 0          | 2                                          | 0.7053        | 0(0-Inf)                |
| MYOTONIA, NOS                                                       | 0                                       | 0          | 6                                          | 2.1464        | 0(0-Inf)                |
| MYOTONIA, PUPIL                                                     | 0                                       | 0          | 5                                          | 3.9398        | 0(0-Inf)                |
| MYRINGITIS, ACUTE                                                   | 0                                       | 0          | 3                                          | 0.7411        | 0(0-Inf)                |
| MYRINGITIS, BULLOUS                                                 | 2                                       | 14.7547    | 58                                         | 13.6467       | 1.0812(0.263-4.445)     |
| MYRINGITIS, NOS                                                     | 2                                       | 14.1837    | 31                                         | 7.5366        | 1.882(0.4473-7.9183)    |
| MYXEDEMA, NOS                                                       | 8                                       | 59.4994    | 226                                        | 51.4057       | 1.1574(0.5705-2.3482)   |
| MYXEDEMA, POST I 131                                                | 1                                       | 9.0069     | 30                                         | 7.1172        | 1.2655(0.1716-9.3347)   |
| MYXEDEMA, POST-OPERATIVE                                            | 2                                       | 14.2643    | 16                                         | 3.597         | 3.9656(0.8987-17.4983)  |
| MYXEDEMA, POST-RADIOIODINE                                          | 0                                       | 0          | 7                                          | 1.8745        | 0(0-Inf)                |



| Description                                        | No. of Positive Cases with Disease Code | Case Rate* | No. of Positive Controls with Disease Code | Control Rate* | Relative Risk (95%CI)    |
|----------------------------------------------------|-----------------------------------------|------------|--------------------------------------------|---------------|--------------------------|
| MYXEDEMA, PRETIBIAL                                | 0                                       | 0          | 5                                          | 1.1704        | 0(0-Inf)                 |
| MYXEDEMA, PRIMARY                                  | 1                                       | 9.8248     | 25                                         | 6.2381        | 1.575(0.212-11.7021)     |
| MYXEDEMA, SECONDARY, NEC                           | 0                                       | 0          | 4                                          | 0.8814        | 0(0-Inf)                 |
| MYXEDEMA, SPONTANEOUS                              | 1                                       | 8.526      | 1                                          | 0.2217        | 38.4533(2.2571-655.124)  |
| MYXOFIBROMA, NOS CODE ALSO NEOPLASM BENIGN BY SITE | 0                                       | 0          | 2                                          | 0.5458        | 0(0-Inf)                 |
| MYXOMA, HEART                                      | 1                                       | 8.9368     | 33                                         | 14.0289       | 0.637(0.0868-4.6736)     |
| MYXOMA, NEC, CODE ALSO NEOPLASM, BENIGN BY SITE    | 2                                       | 21.6565    | 16                                         | 4.3745        | 4.9506(1.1244-21.7964)   |
| MYXOMA, VOCAL CORD                                 | 0                                       | 0          | 8                                          | 2.4471        | 0(0-Inf)                 |
| NAIL BITING, ADULT                                 | 0                                       | 0          | 2                                          | 0.5069        | 0(0-Inf)                 |
| NANOPHTHALMOS SEE ALSO MICROPHTHALMOS              | 0                                       | 0          | 1                                          | 0.234         | 0(0-Inf)                 |
| NARCOLEPSY                                         | 1                                       | 9.0096     | 68                                         | 18.176        | 0.4957(0.0687-3.5778)    |
| NARCOSIS, CARBON DIOXIDE                           | 0                                       | 0          | 1                                          | 0.8528        | 0(0-Inf)                 |
| NARROW ANGLES (EYE)                                | 2                                       | 17.1151    | 90                                         | 35.3921       | 0.4836(0.1189-1.9677)    |
| NARROWING, ARTERY, NEC                             | 0                                       | 0          | 1                                          | 0.8877        | 0(0-Inf)                 |
| NARROWING, AUDITORY CANAL, EXTERNAL                | 0                                       | 0          | 3                                          | 2.0953        | 0(0-Inf)                 |
| NARROWING, CORONARY ARTERY                         | 0                                       | 0          | 1                                          | 0.2729        | 0(0-Inf)                 |
| NARROWING, JOINT SPACE, NEC (OTHER THAN SPINE)     | 1                                       | 7.5184     | 85                                         | 26.7144       | 0.2814(0.0391-2.0247)    |
| NARROWING, JOINT SPACE, SPINE, CERVICAL DISC       | 0                                       | 0          | 53                                         | 12.6035       | 0(0-Inf)                 |
| NARROWING, JOINT SPACE, SPINE, LUMBAR DISC         | 4                                       | 29.614     | 65                                         | 15.4571       | 1.9159(0.6946-5.2846)    |
| NARROWING, JOINT SPACE, SPINE, NOS                 | 1                                       | 7.1563     | 25                                         | 5.7795        | 1.2382(0.1666-9.2036)    |
| NARROWING, MESENTERIC ARTERY                       | 0                                       | 0          | 1                                          | 0.8877        | 0(0-Inf)                 |
| NARROWING, RENAL ARTERY                            | 0                                       | 0          | 1                                          | 0.234         | 0(0-Inf)                 |
| NARROWING, RETINAL ARTERY                          | 1                                       | 9.1745     | 1                                          | 0.4524        | 20.2812(1.2262-335.4484) |
| NARROWING, URETERAL                                | 1                                       | 8.0633     | 5                                          | 1.8065        | 4.4635(0.5113-38.9616)   |
| NARROWING, URETHRA                                 | 1                                       | 7.9122     | 14                                         | 5.0204        | 1.576(0.2057-12.0731)    |
| NASOPHARYNGITIS, BACTERIAL                         | 0                                       | 0          | 1                                          | 0.398         | 0(0-Inf)                 |
| NASOPHARYNGITIS, CHRONIC                           | 0                                       | 0          | 2                                          | 1.1616        | 0(0-Inf)                 |
| NASOPHARYNGITIS, NOS                               | 0                                       | 0          | 26                                         | 6.3373        | 0(0-Inf)                 |
| NASOPHARYNGITIS, NOS, ACUTE                        | 0                                       | 0          | 5                                          | 1.7499        | 0(0-Inf)                 |
| NASOPHARYNGITIS, SICCA                             | 0                                       | 0          | 3                                          | 1.2105        | 0(0-Inf)                 |
| NASOPHARYNGITIS, VIRAL                             | 0                                       | 0          | 3                                          | 0.741         | 0(0-Inf)                 |
| NAUSEA, NOS                                        | 68                                      | 675.4209   | 1670                                       | 791.064       | 0.8538(0.6696-1.0887)    |
| NAUSEA, PREGNANCY, FIRST TRIMESTER                 | 0                                       | 0          | 1                                          | 0.4048        | 0(0-Inf)                 |
| NEAR-DROWNING, ACCIDENT                            | 0                                       | 0          | 1                                          | 0.3526        | 0(0-Inf)                 |
| NEAR-SYNCOPE                                       | 13                                      | 128.4828   | 346                                        | 168.9709      | 0.7604(0.4365-1.3244)    |
| NEBULAE (CORNEAL)                                  | 0                                       | 0          | 1                                          | 0.8877        | 0(0-Inf)                 |
| NECROBIOSIS, LIPOID(ICA), NOS                      | 0                                       | 0          | 3                                          | 0.6536        | 0(0-Inf)                 |
| NECROBIOSIS, LIPOIDICA DIABETICORUM                | 0                                       | 0          | 5                                          | 1.1117        | 0(0-Inf)                 |
| NECROLYSIS (TOXIC EPIDERMAL)                       | 0                                       | 0          | 1                                          | 0.4049        | 0(0-Inf)                 |
| NECROSIS, BLADDER                                  | 1                                       | 12.5664    | 10                                         | 6.8284        | 1.8403(0.2338-14.4826)   |

| Description                                         | No. of Positive Cases with Disease Code | Case Rate* | No. of Positive Controls with Disease Code | Control Rate* | Relative Risk (95%CI)  |
|-----------------------------------------------------|-----------------------------------------|------------|--------------------------------------------|---------------|------------------------|
| NECROSIS, BONE, ASEPTIC, CODE ALSO BY SITE STATED   | 1                                       | 7.043      | 10                                         | 2.2959        | 3.0677(0.3861-24.3745) |
| NECROSIS, BONE, AVASCULAR, CODE ALSO BY SITE STATED | 5                                       | 39.2582    | 113                                        | 38.0549       | 1.0316(0.42-2.534)     |
| NECROSIS, BONE, NOS                                 | 0                                       | 0          | 11                                         | 3.8814        | 0(0-Inf)               |
| NECROSIS, BRAIN                                     | 1                                       | 6.9965     | 3                                          | 0.8042        | 8.7(0.8738-86.6242)    |
| NECROSIS, BREAST                                    | 2                                       | 15.0762    | 27                                         | 5.8861        | 2.5613(0.6034-10.872)  |
| NECROSIS, BRONCHUS                                  | 0                                       | 0          | 2                                          | 0.5709        | 0(0-Inf)               |
| NECROSIS, CORNEA                                    | 0                                       | 0          | 1                                          | 0.2354        | 0(0-Inf)               |
| NECROSIS, CYSTIC MEDIAL AORTA                       | 0                                       | 0          | 2                                          | 0.5458        | 0(0-Inf)               |
| NECROSIS, CYSTIC MEDIAL, POPLITEAL ARTERY           | 0                                       | 0          | 1                                          | 0.2729        | 0(0-Inf)               |
| NECROSIS, DENTAL PULP                               | 1                                       | 8.0901     | 54                                         | 19.3911       | 0.4172(0.0576-3.0234)  |
| NECROSIS, EAR                                       | 0                                       | 0          | 7                                          | 2.127         | 0(0-Inf)               |
| NECROSIS, ESOPHAGUS                                 | 1                                       | 7.297      | 5                                          | 1.4898        | 4.8981(0.559-42.9213)  |
| NECROSIS, FAT, BREAST                               | 0                                       | 0          | 38                                         | 17.1398       | 0(0-Inf)               |
| NECROSIS, FAT, INTESTINE                            | 0                                       | 0          | 12                                         | 3.6221        | 0(0-Inf)               |
| NECROSIS, FAT, MESENTERY                            | 1                                       | 10.1762    | 4                                          | 2.055         | 4.9518(0.5415-45.2863) |
| NECROSIS, FAT, NOS                                  | 3                                       | 21.5777    | 31                                         | 8.6902        | 2.483(0.7527-8.1907)   |
| NECROSIS, FAT, OMENTUM                              | 1                                       | 6.973      | 16                                         | 4.1453        | 1.6822(0.2209-12.8072) |
| NECROSIS, FAT, PANCREAS                             | 0                                       | 0          | 1                                          | 0.2729        | 0(0-Inf)               |
| NECROSIS, FAT, PERITONEUM, NOS,                     | 0                                       | 0          | 8                                          | 2.6451        | 0(0-Inf)               |
| NECROSIS, FAT, SKIN                                 | 0                                       | 0          | 4                                          | 0.9158        | 0(0-Inf)               |
| NECROSIS, FAT, SUBCUTANEOUS                         | 0                                       | 0          | 27                                         | 6.0746        | 0(0-Inf)               |
| NECROSIS, FEMORAL HEAD                              | 2                                       | 14.3561    | 32                                         | 9.0094        | 1.5935(0.3792-6.6952)  |
| NECROSIS, GASTRIC                                   | 0                                       | 0          | 3                                          | 0.9164        | 0(0-Inf)               |
| NECROSIS, GLOTTIS                                   | 0                                       | 0          | 1                                          | 0.2354        | 0(0-Inf)               |
| NECROSIS, HEART, SEE ALSO INFARCTION MYOCARDIAL     | 0                                       | 0          | 3                                          | 1.1482        | 0(0-Inf)               |
| NECROSIS, HEPATIC                                   | 1                                       | 7.0808     | 4                                          | 1.1279        | 6.2779(0.6831-57.6966) |
| NECROSIS, HIP, INFECTIVE                            | 0                                       | 0          | 1                                          | 0.4048        | 0(0-Inf)               |
| NECROSIS, HIP, NOS                                  | 3                                       | 25.632     | 57                                         | 22.3169       | 1.1485(0.3582-3.6824)  |
| NECROSIS, HUMERUS (HEAD)                            | 0                                       | 0          | 11                                         | 3.5033        | 0(0-Inf)               |
| NECROSIS, INTESTINE/COLON                           | 3                                       | 22.6957    | 41                                         | 12.9076       | 1.7583(0.541-5.7143)   |
| NECROSIS, ISCHEMIC, BONE, NEC/NOS                   | 0                                       | 0          | 2                                          | 1.0788        | 0(0-Inf)               |
| NECROSIS, ISCHEMIC, NEC/NOS                         | 1                                       | 8.95       | 5                                          | 2.1144        | 4.2329(0.4847-36.9644) |
| NECROSIS, JAW                                       | 0                                       | 0          | 2                                          | 1.0782        | 0(0-Inf)               |
| NECROSIS, LUNG                                      | 0                                       | 0          | 5                                          | 1.9395        | 0(0-Inf)               |
| NECROSIS, LYMPHATIC GLAND                           | 0                                       | 0          | 3                                          | 0.746         | 0(0-Inf)               |
| NECROSIS, METATARSAL HEAD, ISCHEMIC                 | 0                                       | 0          | 1                                          | 0.8528        | 0(0-Inf)               |
| NECROSIS, MUSCLE                                    | 1                                       | 7.6944     | 1                                          | 0.3293        | 23.3645(1.3838-394.48) |
| NECROSIS, MYOCUTANEOUS FLAP                         | 0                                       | 0          | 3                                          | 0.7063        | 0(0-Inf)               |
| NECROSIS, NOS, SEE ALSO GANGRENE                    | 0                                       | 0          | 8                                          | 2.4467        | 0(0-Inf)               |
| NECROSIS, NOSE                                      | 0                                       | 0          | 3                                          | 0.746         | 0(0-Inf)               |

| Description                                                           | No. of Positive Cases with Disease Code | Case Rate* | No. of Positive Controls with Disease Code | Control Rate* | Relative Risk (95%CI)   |
|-----------------------------------------------------------------------|-----------------------------------------|------------|--------------------------------------------|---------------|-------------------------|
| NECROSIS, OVARY, SEE ALSO OOPHORITIS                                  | 0                                       | 0          | 5                                          | 1.3846        | 0(0-Inf)                |
| NECROSIS, PANCREAS                                                    | 0                                       | 0          | 4                                          | 1.5794        | 0(0-Inf)                |
| NECROSIS, POSTOP (WOUND)                                              | 1                                       | 9.3874     | 29                                         | 13.1973       | 0.7113(0.0965-5.2427)   |
| NECROSIS, PRESSURE                                                    | 1                                       | 12.242     | 8                                          | 5.3757        | 2.2773(0.2818-18.4021)  |
| NECROSIS, RADIATION, CODE NECROSIS BY SITE                            | 0                                       | 0          | 7                                          | 2.4583        | 0(0-Inf)                |
| NECROSIS, RECTUM                                                      | 0                                       | 0          | 2                                          | 1.1625        | 0(0-Inf)                |
| NECROSIS, RENAL, CORTICAL                                             | 0                                       | 0          | 1                                          | 0.2729        | 0(0-Inf)                |
| NECROSIS, RENAL, NOS                                                  | 0                                       | 0          | 5                                          | 1.2831        | 0(0-Inf)                |
| NECROSIS, RENAL, PAPILLARY                                            | 0                                       | 0          | 8                                          | 1.9507        | 0(0-Inf)                |
| NECROSIS, RENAL, TUBULAR                                              | 3                                       | 31.5838    | 23                                         | 12.4264       | 2.5417(0.7575-8.5278)   |
| NECROSIS, SKIN GRAFT                                                  | 0                                       | 0          | 3                                          | 0.7175        | 0(0-Inf)                |
| NECROSIS, SKIN, NOS                                                   | 4                                       | 28.2815    | 59                                         | 16.1986       | 1.7459(0.6312-4.8296)   |
| NECROSIS, SPINAL COLUMN, NOS                                          | 0                                       | 0          | 1                                          | 0.2729        | 0(0-Inf)                |
| NECROSIS, TESTIS                                                      | 0                                       | 0          | 1                                          | 0.4751        | 0(0-Inf)                |
| NECROSIS, TOOTH                                                       | 0                                       | 0          | 15                                         | 7.0831        | 0(0-Inf)                |
| NECROSIS, VAGINA                                                      | 0                                       | 0          | 3                                          | 1.5395        | 0(0-Inf)                |
| NEED FOR CHRONIC VENOUS/ ARTERIAL ACCESS (CODE ALSO CONDITION STATED) | 2                                       | 16.4222    | 68                                         | 25.1754       | 0.6523(0.1595-2.6684)   |
| NEGLECT, MUSCULOSKELETAL SYMPTOM                                      | 0                                       | 0          | 17                                         | 10.4504       | 0(0-Inf)                |
| NEGLECT, NEC                                                          | 0                                       | 0          | 5                                          | 2.7714        | 0(0-Inf)                |
| NEOPLASIA, BLADDER                                                    | 1                                       | 30.6382    | 0                                          | 0             | 14419207676.1245(0-Inf) |
| NEOPLASIA, CERVICAL INTRAEPITHELIAL TYPE 3 (CIN 3)                    | 0                                       | 0          | 21                                         | 9.5004        | 0(0-Inf)                |
| NEOPLASIA, CERVICAL INTRAEPITHELIAL TYPES 1 & 2 (CIN)                 | 4                                       | 67.5336    | 70                                         | 31.0009       | 2.1784(0.7913-5.9973)   |
| NEOPLASIA, COLORECTAL                                                 | 0                                       | 0          | 1                                          | 2.4859        | 0(0-Inf)                |
| NEOPLASIA, CONJUNCTIVAL INTRAEPITHELIAL                               | 1                                       | 17.7877    | 3                                          | 3.2169        | 5.5294(0.5677-53.8524)  |
| NEOPLASIA, INTRAEPITHELIAL, VAGINA (VAIN)                             | 2                                       | 27.9652    | 21                                         | 9.41          | 2.9719(0.6885-12.8282)  |
| NEOPLASIA, MULTIPLE ENDOCRINE, TYPE 2                                 | 0                                       | 0          | 1                                          | 0.8879        | 0(0-Inf)                |
| NEOPLASIA, MULTIPLE ENDOCRINE, TYPE 2A                                | 0                                       | 0          | 1                                          | 0.8879        | 0(0-Inf)                |
| NEOPLASIA, PROSTATE (INTRADUCTAL)(INTRAEPITHELIAL)                    | 12                                      | 108.5725   | 180                                        | 79.2444       | 1.3701(0.7625-2.4619)   |
| NEOPLASIA, VULVA INTRAEPITHELIAL                                      | 2                                       | 28.0708    | 16                                         | 8.3877        | 3.3467(0.7585-14.7666)  |
| NEOPLASM, BENIGN, ADRENAL CORTEX                                      | 0                                       | 0          | 7                                          | 1.7145        | 0(0-Inf)                |
| NEOPLASM, BENIGN, ADRENAL GLAND, NOS                                  | 0                                       | 0          | 56                                         | 17.6135       | 0(0-Inf)                |
| NEOPLASM, BENIGN, AMPULLA OF VATER                                    | 0                                       | 0          | 2                                          | 1.7756        | 0(0-Inf)                |
| NEOPLASM, BENIGN, ANUS                                                | 0                                       | 0          | 26                                         | 6.2303        | 0(0-Inf)                |
| NEOPLASM, BENIGN, APOCRINE (GLAND)                                    | 0                                       | 0          | 4                                          | 1.6195        | 0(0-Inf)                |
| NEOPLASM, BENIGN, APPENDIX                                            | 1                                       | 7.8107     | 10                                         | 3.3772        | 2.3128(0.2923-18.3005)  |
| NEOPLASM, BENIGN, BARTHOLIN'S GLAND                                   | 0                                       | 0          | 1                                          | 0.398         | 0(0-Inf)                |
| NEOPLASM, BENIGN, BILE DUCT                                           | 0                                       | 0          | 5                                          | 1.5261        | 0(0-Inf)                |
| NEOPLASM, BENIGN, BLADDER                                             | 1                                       | 8.8475     | 40                                         | 16.6771       | 0.5305(0.0727-3.8706)   |
| NEOPLASM, BENIGN, BONE, HEAD OR NECK                                  | 1                                       | 7.7765     | 2                                          | 0.6823        | 11.3967(0.996-130.4104) |

| Description                                    | No. of Positive Cases with Disease Code |            | No. of Positive Controls with Disease Code |               | Relative Risk (95%CI)    |
|------------------------------------------------|-----------------------------------------|------------|--------------------------------------------|---------------|--------------------------|
|                                                |                                         | Case Rate* |                                            | Control Rate* |                          |
| NEOPLASM, BENIGN, BONE, LOWER EXTREMITY        | 2                                       | 13.959     | 9                                          | 2.2044        | 6.3324(1.3416-29.8876)   |
| NEOPLASM, BENIGN, BONE, TRUNK                  | 0                                       | 0          | 4                                          | 1.8402        | 0(0-Inf)                 |
| NEOPLASM, BENIGN, BONE, UPPER EXTREMITY        | 1                                       | 7.0413     | 10                                         | 2.4506        | 2.8732(0.3627-22.7589)   |
| NEOPLASM, BENIGN, BOWEL, SMALL                 | 1                                       | 14.0428    | 1                                          | 0.8075        | 17.3913(1.0525-287.3823) |
| NEOPLASM, BENIGN, BRAIN                        | 2                                       | 14.9334    | 65                                         | 19.8926       | 0.7507(0.1832-3.0769)    |
| NEOPLASM, BENIGN, BREAST, NEC                  | 1                                       | 6.994      | 13                                         | 3.3659        | 2.0779(0.2683-16.091)    |
| NEOPLASM, BENIGN, BREAST, NOS                  | 0                                       | 0          | 35                                         | 7.9578        | 0(0-Inf)                 |
| NEOPLASM, BENIGN, BRONCHUS                     | 0                                       | 0          | 1                                          | 0.2729        | 0(0-Inf)                 |
| NEOPLASM, BENIGN, BUCCAL CAVITY                | 0                                       | 0          | 3                                          | 1.27          | 0(0-Inf)                 |
| NEOPLASM, BENIGN, BUCCAL MUCOSA                | 4                                       | 27.8071    | 81                                         | 20.0007       | 1.3903(0.5074-3.8095)    |
| NEOPLASM, BENIGN, CARDIA                       | 0                                       | 0          | 4                                          | 1.1417        | 0(0-Inf)                 |
| NEOPLASM, BENIGN, CARTILAGE                    | 0                                       | 0          | 1                                          | 0.234         | 0(0-Inf)                 |
| NEOPLASM, BENIGN, CECUM                        | 0                                       | 0          | 15                                         | 3.9171        | 0(0-Inf)                 |
| NEOPLASM, BENIGN, CERVIX, NEC                  | 2                                       | 26.0915    | 8                                          | 2.2031        | 11.8433(2.4714-56.7543)  |
| NEOPLASM, BENIGN, CLITORIS                     | 0                                       | 0          | 1                                          | 0.398         | 0(0-Inf)                 |
| NEOPLASM, BENIGN, COLON                        | 0                                       | 0          | 24                                         | 8.8054        | 0(0-Inf)                 |
| NEOPLASM, BENIGN, COMMISSURE                   | 0                                       | 0          | 3                                          | 0.8456        | 0(0-Inf)                 |
| NEOPLASM, BENIGN, CUL-DE-SAC                   | 0                                       | 0          | 1                                          | 0.2354        | 0(0-Inf)                 |
| NEOPLASM, BENIGN, DERMIS                       | 0                                       | 0          | 5                                          | 1.4283        | 0(0-Inf)                 |
| NEOPLASM, BENIGN, DUODENUM                     | 0                                       | 0          | 3                                          | 1.2104        | 0(0-Inf)                 |
| NEOPLASM, BENIGN, EAR, CARTILAGE               | 0                                       | 0          | 4                                          | 1.0274        | 0(0-Inf)                 |
| NEOPLASM, BENIGN, ENDOMETRIUM, NEC             | 0                                       | 0          | 13                                         | 6.4369        | 0(0-Inf)                 |
| NEOPLASM, BENIGN, EPIDIDYMIS                   | 0                                       | 0          | 1                                          | 0.4751        | 0(0-Inf)                 |
| NEOPLASM, BENIGN, ESOPHAGOGASTRIC JUNCTION     | 0                                       | 0          | 4                                          | 2.3948        | 0(0-Inf)                 |
| NEOPLASM, BENIGN, ESOPHAGUS                    | 2                                       | 13.9177    | 15                                         | 3.7745        | 3.6873(0.8331-16.3194)   |
| NEOPLASM, BENIGN, ETHMOIDAL SINUS              | 0                                       | 0          | 2                                          | 0.4708        | 0(0-Inf)                 |
| NEOPLASM, BENIGN, EXTRARECTAL                  | 0                                       | 0          | 1                                          | 0.398         | 0(0-Inf)                 |
| NEOPLASM, BENIGN, EYE, NOS                     | 1                                       | 7.3393     | 63                                         | 18.886        | 0.3886(0.0538-2.8088)    |
| NEOPLASM, BENIGN, EYELID, CARTILAGE            | 0                                       | 0          | 12                                         | 3.2549        | 0(0-Inf)                 |
| NEOPLASM, BENIGN, EYELID, SKIN (CANTHUS)       | 0                                       | 0          | 66                                         | 19.1504       | 0(0-Inf)                 |
| NEOPLASM, BENIGN, FALLOPIAN                    | 0                                       | 0          | 5                                          | 1.2605        | 0(0-Inf)                 |
| NEOPLASM, BENIGN, FRENULUM LABII               | 0                                       | 0          | 2                                          | 0.8097        | 0(0-Inf)                 |
| NEOPLASM, BENIGN, GALLBLADDER                  | 0                                       | 0          | 20                                         | 4.9837        | 0(0-Inf)                 |
| NEOPLASM, BENIGN, GASTROINTESTINAL SYSTEM, NOS | 0                                       | 0          | 2                                          | 0.7896        | 0(0-Inf)                 |
| NEOPLASM, BENIGN, GENITAL, FEMALE, NEC         | 0                                       | 0          | 2                                          | 0.5837        | 0(0-Inf)                 |
| NEOPLASM, BENIGN, GENITAL, FEMALE, NOS         | 0                                       | 0          | 1                                          | 0.234         | 0(0-Inf)                 |
| NEOPLASM, BENIGN, GLANS PENIS                  | 0                                       | 0          | 1                                          | 0.3526        | 0(0-Inf)                 |
| NEOPLASM, BENIGN, GUM                          | 0                                       | 0          | 9                                          | 2.2117        | 0(0-Inf)                 |
| NEOPLASM, BENIGN, HEAD, SKIN                   | 12                                      | 86.2898    | 217                                        | 61.3207       | 1.4072(0.7851-2.5221)    |
| NEOPLASM, BENIGN, HEAD, SOFT TISSUE            | 1                                       | 7.5137     | 17                                         | 5.4688        | 1.3739(0.1816-10.3954)   |

| Description                                    | No. of Positive Cases with Disease Code |            | No. of Positive Controls with Disease Code |               | Relative Risk (95%CI)  |
|------------------------------------------------|-----------------------------------------|------------|--------------------------------------------|---------------|------------------------|
|                                                |                                         | Case Rate* |                                            | Control Rate* |                        |
| NEOPLASM, BENIGN, HEART                        | 0                                       | 0          | 6                                          | 2.43          | 0(0-Inf)               |
| NEOPLASM, BENIGN, HEPATIC DUCT                 | 0                                       | 0          | 1                                          | 0.234         | 0(0-Inf)               |
| NEOPLASM, BENIGN, ILEOCECAL VALVE              | 2                                       | 17.028     | 39                                         | 15.2327       | 1.1179(0.2687-4.6499)  |
| NEOPLASM, BENIGN, ILEUM                        | 0                                       | 0          | 3                                          | 1.5111        | 0(0-Inf)               |
| NEOPLASM, BENIGN, INTESTINE, LARGE             | 0                                       | 0          | 16                                         | 5.0831        | 0(0-Inf)               |
| NEOPLASM, BENIGN, INTESTINE, SMALL             | 0                                       | 0          | 3                                          | 1.2106        | 0(0-Inf)               |
| NEOPLASM, BENIGN, JEJUNUM                      | 1                                       | 10.3319    | 3                                          | 1.5741        | 6.5638(0.6674-64.5507) |
| NEOPLASM, BENIGN, KIDNEY                       | 3                                       | 23.6646    | 39                                         | 13.4479       | 1.7597(0.5408-5.7257)  |
| NEOPLASM, BENIGN, LABIA                        | 0                                       | 0          | 15                                         | 6.4883        | 0(0-Inf)               |
| NEOPLASM, BENIGN, LIGAMENT, BROAD              | 0                                       | 0          | 2                                          | 0.5837        | 0(0-Inf)               |
| NEOPLASM, BENIGN, LIGAMENT, EXCEPT UTERINE     | 0                                       | 0          | 1                                          | 0.234         | 0(0-Inf)               |
| NEOPLASM, BENIGN, LIGAMENT, ROUND              | 0                                       | 0          | 1                                          | 0.234         | 0(0-Inf)               |
| NEOPLASM, BENIGN, LIP                          | 5                                       | 34.8587    | 100                                        | 25.0133       | 1.3936(0.5656-3.4337)  |
| NEOPLASM, BENIGN, LIVER                        | 2                                       | 14.5243    | 19                                         | 5.6145        | 2.5869(0.5967-11.215)  |
| NEOPLASM, BENIGN, LOWER EXTREMITY, SKIN        | 1                                       | 7.5686     | 80                                         | 18.9314       | 0.3998(0.0555-2.8793)  |
| NEOPLASM, BENIGN, LOWER EXTREMITY, SOFT TISSUE | 1                                       | 6.9375     | 36                                         | 8.9628        | 0.774(0.1056-5.6721)   |
| NEOPLASM, BENIGN, LUNG                         | 0                                       | 0          | 12                                         | 3.0897        | 0(0-Inf)               |
| NEOPLASM, BENIGN, MEDIASTINUM                  | 0                                       | 0          | 1                                          | 0.8539        | 0(0-Inf)               |
| NEOPLASM, BENIGN, MENINGES, CEREBRAL           | 0                                       | 0          | 1                                          | 0.2729        | 0(0-Inf)               |
| NEOPLASM, BENIGN, MESENTERY                    | 0                                       | 0          | 2                                          | 0.5908        | 0(0-Inf)               |
| NEOPLASM, BENIGN, MIDDLE EAR                   | 0                                       | 0          | 1                                          | 0.4048        | 0(0-Inf)               |
| NEOPLASM, BENIGN, MOUTH, FLOOR OF              | 0                                       | 0          | 6                                          | 2.0359        | 0(0-Inf)               |
| NEOPLASM, BENIGN, MOUTH, NEC                   | 0                                       | 0          | 13                                         | 3.2518        | 0(0-Inf)               |
| NEOPLASM, BENIGN, MOUTH, NOS                   | 0                                       | 0          | 12                                         | 3.4864        | 0(0-Inf)               |
| NEOPLASM, BENIGN, MOUTH, ROOF OF               | 0                                       | 0          | 1                                          | 0.8528        | 0(0-Inf)               |
| NEOPLASM, BENIGN, MYOMETRIUM, NEC              | 0                                       | 0          | 65                                         | 28.1498       | 0(0-Inf)               |
| NEOPLASM, BENIGN, NARES                        | 0                                       | 0          | 1                                          | 0.398         | 0(0-Inf)               |
| NEOPLASM, BENIGN, NASAL CAVITY                 | 0                                       | 0          | 1                                          | 0.2354        | 0(0-Inf)               |
| NEOPLASM, BENIGN, NASOPHARYNX                  | 0                                       | 0          | 2                                          | 0.8723        | 0(0-Inf)               |
| NEOPLASM, BENIGN, NEC                          | 0                                       | 0          | 6                                          | 1.4822        | 0(0-Inf)               |
| NEOPLASM, BENIGN, NECK, SKIN                   | 0                                       | 0          | 86                                         | 20.6503       | 0(0-Inf)               |
| NEOPLASM, BENIGN, NECK, SOFT TISSUE            | 0                                       | 0          | 14                                         | 3.7781        | 0(0-Inf)               |
| NEOPLASM, BENIGN, NERVE, CRANIAL               | 0                                       | 0          | 3                                          | 0.871         | 0(0-Inf)               |
| NEOPLASM, BENIGN, NERVE, PERIPHERAL            | 0                                       | 0          | 2                                          | 0.5709        | 0(0-Inf)               |
| NEOPLASM, BENIGN, NERVOUS SYSTEM, NOS          | 0                                       | 0          | 2                                          | 0.5709        | 0(0-Inf)               |
| NEOPLASM, BENIGN, NOS                          | 0                                       | 0          | 36                                         | 8.5773        | 0(0-Inf)               |
| NEOPLASM, BENIGN, NOSE                         | 0                                       | 0          | 20                                         | 5.5149        | 0(0-Inf)               |
| NEOPLASM, BENIGN, ORBIT                        | 0                                       | 0          | 3                                          | 0.7885        | 0(0-Inf)               |
| NEOPLASM, BENIGN, OVARY, NEC                   | 0                                       | 0          | 1                                          | 0.234         | 0(0-Inf)               |
| NEOPLASM, BENIGN, OVARY, NOS                   | 0                                       | 0          | 15                                         | 7.2349        | 0(0-Inf)               |

| Description                                     | No. of Positive Cases with Disease Code | Case Rate* | No. of Positive Controls with Disease Code | Control Rate* | Relative Risk (95%CI)  |
|-------------------------------------------------|-----------------------------------------|------------|--------------------------------------------|---------------|------------------------|
| NEOPLASM, BENIGN, PALATE                        | 0                                       | 0          | 37                                         | 9.7464        | 0(0-Inf)               |
| NEOPLASM, BENIGN, PANCREAS                      | 1                                       | 9.8317     | 13                                         | 6.3479        | 1.5488(0.2009-11.9406) |
| NEOPLASM, BENIGN, PAROTID                       | 0                                       | 0          | 32                                         | 7.5547        | 0(0-Inf)               |
| NEOPLASM, BENIGN, PELVIC, NOS                   | 1                                       | 7.1872     | 8                                          | 2.2924        | 3.1352(0.3856-25.4917) |
| NEOPLASM, BENIGN, PENIS                         | 0                                       | 0          | 5                                          | 1.3401        | 0(0-Inf)               |
| NEOPLASM, BENIGN, PERITONEUM                    | 0                                       | 0          | 1                                          | 0.8275        | 0(0-Inf)               |
| NEOPLASM, BENIGN, PHARYNX, NOS                  | 0                                       | 0          | 1                                          | 0.2354        | 0(0-Inf)               |
| NEOPLASM, BENIGN, PITUITARY                     | 0                                       | 0          | 1                                          | 0.8542        | 0(0-Inf)               |
| NEOPLASM, BENIGN, PLEURA                        | 0                                       | 0          | 2                                          | 0.7896        | 0(0-Inf)               |
| NEOPLASM, BENIGN, PROSTATE                      | 0                                       | 0          | 2                                          | 1.079         | 0(0-Inf)               |
| NEOPLASM, BENIGN, PYLORUS                       | 0                                       | 0          | 2                                          | 1.8977        | 0(0-Inf)               |
| NEOPLASM, BENIGN, RECTOSIGMOID JUNCTION         | 0                                       | 0          | 2                                          | 0.4853        | 0(0-Inf)               |
| NEOPLASM, BENIGN, RECTUM                        | 0                                       | 0          | 10                                         | 2.5336        | 0(0-Inf)               |
| NEOPLASM, BENIGN, RETROPERITONEUM               | 0                                       | 0          | 1                                          | 0.2729        | 0(0-Inf)               |
| NEOPLASM, BENIGN, SALIVARY DUCT                 | 0                                       | 0          | 1                                          | 0.2354        | 0(0-Inf)               |
| NEOPLASM, BENIGN, SALIVARY GLAND, NOS           | 0                                       | 0          | 8                                          | 2.0533        | 0(0-Inf)               |
| NEOPLASM, BENIGN, SCROTUM                       | 0                                       | 0          | 8                                          | 2.2835        | 0(0-Inf)               |
| NEOPLASM, BENIGN, SEBACEOUS GLAND               | 0                                       | 0          | 10                                         | 8.2422        | 0(0-Inf)               |
| NEOPLASM, BENIGN, SKIN, NOS, CODE SITE IF GIVEN | 16                                      | 112.8919   | 285                                        | 75.439        | 1.4965(0.9026-2.4812)  |
| NEOPLASM, BENIGN, SPERMATIC CORD                | 0                                       | 0          | 1                                          | 0.3526        | 0(0-Inf)               |
| NEOPLASM, BENIGN, SPHENOID WING                 | 0                                       | 0          | 2                                          | 0.7896        | 0(0-Inf)               |
| NEOPLASM, BENIGN, SPHENOIDAL SINUS              | 0                                       | 0          | 1                                          | 0.2354        | 0(0-Inf)               |
| NEOPLASM, BENIGN, SPINAL CORD                   | 1                                       | 8.0001     | 15                                         | 5.2873        | 1.5131(0.1982-11.5525) |
| NEOPLASM, BENIGN, SPLEEN                        | 0                                       | 0          | 2                                          | 1.1972        | 0(0-Inf)               |
| NEOPLASM, BENIGN, STOMACH                       | 1                                       | 8.7969     | 24                                         | 9.89          | 0.8895(0.1197-6.6117)  |
| NEOPLASM, BENIGN, SUBMAXILLARY                  | 0                                       | 0          | 1                                          | 0.398         | 0(0-Inf)               |
| NEOPLASM, BENIGN, SWEAT DUCT                    | 1                                       | 6.8901     | 0                                          | 0             | 12235366623.654(0-Inf) |
| NEOPLASM, BENIGN, SWEAT GLANDS                  | 0                                       | 0          | 6                                          | 1.3076        | 0(0-Inf)               |
| NEOPLASM, BENIGN, TENDON SHEATH                 | 0                                       | 0          | 5                                          | 1.1413        | 0(0-Inf)               |
| NEOPLASM, BENIGN, THYROID                       | 0                                       | 0          | 1                                          | 0.8877        | 0(0-Inf)               |
| NEOPLASM, BENIGN, TONGUE                        | 7                                       | 49.9851    | 79                                         | 18.6537       | 2.6796(1.2305-5.8353)  |
| NEOPLASM, BENIGN, TONSIL                        | 0                                       | 0          | 9                                          | 2.1464        | 0(0-Inf)               |
| NEOPLASM, BENIGN, TOOTH                         | 0                                       | 0          | 1                                          | 0.398         | 0(0-Inf)               |
| NEOPLASM, BENIGN, TRUNK, SKIN                   | 7                                       | 49.2485    | 195                                        | 48.3555       | 1.0185(0.4782-2.1692)  |
| NEOPLASM, BENIGN, TRUNK, SOFT TISSUE            | 0                                       | 0          | 29                                         | 7.2865        | 0(0-Inf)               |
| NEOPLASM, BENIGN, UPPER EXTREMITY, SKIN         | 9                                       | 63.6214    | 95                                         | 23.0714       | 2.7576(1.3855-5.4886)  |
| NEOPLASM, BENIGN, UPPER EXTREMITY, SOFT TISSUE  | 0                                       | 0          | 29                                         | 7.436         | 0(0-Inf)               |
| NEOPLASM, BENIGN, URETER                        | 0                                       | 0          | 6                                          | 3.2374        | 0(0-Inf)               |
| NEOPLASM, BENIGN, URETHRA                       | 1                                       | 7.4588     | 18                                         | 5.6836        | 1.3123(0.174-9.8997)   |
| NEOPLASM, BENIGN, UTERUS, NEC                   | 0                                       | 0          | 19                                         | 13.6391       | 0(0-Inf)               |

| Description                                              | No. of Positive Cases with Disease Code | Case Rate* | No. of Positive Controls with Disease Code | Control Rate* | Relative Risk (95%CI)    |
|----------------------------------------------------------|-----------------------------------------|------------|--------------------------------------------|---------------|--------------------------|
| NEOPLASM, BENIGN, UVULA                                  | 0                                       | 0          | 6                                          | 2.0987        | 0(0-Inf)                 |
| NEOPLASM, BENIGN, VAGINA                                 | 0                                       | 0          | 12                                         | 8.118         | 0(0-Inf)                 |
| NEOPLASM, BENIGN, VASCULAR, SEE ALSO HEMANGIOMA          | 0                                       | 0          | 1                                          | 0.2729        | 0(0-Inf)                 |
| NEOPLASM, BENIGN, VOCAL CORDS                            | 1                                       | 7.0961     | 5                                          | 1.3238        | 5.3602(0.6158-46.6557)   |
| NEOPLASM, BENIGN, VULVA                                  | 0                                       | 0          | 14                                         | 6.3055        | 0(0-Inf)                 |
| NEOPLASM, MALIGNANT, ABDOMINAL WALL, SKIN, PRIMARY       | 1                                       | 7.8531     | 25                                         | 8.6039        | 0.9127(0.123-6.7711)     |
| NEOPLASM, MALIGNANT, ABDOMINAL WALL, SKIN, SECONDARY     | 0                                       | 0          | 1                                          | 0.4048        | 0(0-Inf)                 |
| NEOPLASM, MALIGNANT, ABDOMINAL WALL, SOFT TISSUE, SECOND | 1                                       | 7.4727     | 8                                          | 2.4689        | 3.0267(0.3721-24.6168)   |
| NEOPLASM, MALIGNANT, ABDOMINAL, NOS, PRIMARY             | 0                                       | 0          | 5                                          | 3.2913        | 0(0-Inf)                 |
| NEOPLASM, MALIGNANT, ABDOMINAL, NOS, SECONDARY           | 1                                       | 7.6398     | 24                                         | 7.7144        | 0.9903(0.1331-7.3678)    |
| NEOPLASM, MALIGNANT, ADRENAL, SECONDARY                  | 1                                       | 9.8968     | 15                                         | 7.384         | 1.3403(0.1758-10.2184)   |
| NEOPLASM, MALIGNANT, ALVEOLUS, GUM, NOS, PRIMARY         | 0                                       | 0          | 7                                          | 4.9725        | 0(0-Inf)                 |
| NEOPLASM, MALIGNANT, ALVEOLUS, LOWER GUM, PRIMARY        | 0                                       | 0          | 5                                          | 3.939         | 0(0-Inf)                 |
| NEOPLASM, MALIGNANT, ALVEOLUS, LOWER GUM, SECONDARY      | 0                                       | 0          | 1                                          | 0.8532        | 0(0-Inf)                 |
| NEOPLASM, MALIGNANT, ALVEOLUS, UPPER GUM, PRIMARY        | 0                                       | 0          | 1                                          | 0.8878        | 0(0-Inf)                 |
| NEOPLASM, MALIGNANT, AMPULLA OF VATER, PRIMARY           | 0                                       | 0          | 5                                          | 1.1301        | 0(0-Inf)                 |
| NEOPLASM, MALIGNANT, AMPULLA OF VATER, SECONDARY         | 0                                       | 0          | 1                                          | 2.4949        | 0(0-Inf)                 |
| NEOPLASM, MALIGNANT, ANKLE, SKIN, PRIMARY                | 0                                       | 0          | 19                                         | 6.8896        | 0(0-Inf)                 |
| NEOPLASM, MALIGNANT, ANORECTAL REGION, PRIMARY           | 0                                       | 0          | 3                                          | 2.8231        | 0(0-Inf)                 |
| NEOPLASM, MALIGNANT, ANTERIOR COMMISSURE, PRIMARY        | 0                                       | 0          | 2                                          | 1.0786        | 0(0-Inf)                 |
| NEOPLASM, MALIGNANT, ANUS AND ANAL CANAL, PRIMARY        | 0                                       | 0          | 14                                         | 4.7914        | 0(0-Inf)                 |
| NEOPLASM, MALIGNANT, ANUS, SKIN, PRIMARY                 | 0                                       | 0          | 9                                          | 3.243         | 0(0-Inf)                 |
| NEOPLASM, MALIGNANT, AORTIC BODY, SECONDARY              | 0                                       | 0          | 2                                          | 1.1971        | 0(0-Inf)                 |
| NEOPLASM, MALIGNANT, APPENDIX, PRIMARY                   | 0                                       | 0          | 2                                          | 0.7896        | 0(0-Inf)                 |
| NEOPLASM, MALIGNANT, APPENDIX, SECONDARY                 | 1                                       | 7.1983     | 9                                          | 1.9588        | 3.6749(0.4566-29.5774)   |
| NEOPLASM, MALIGNANT, AREOLA, PRIMARY                     | 0                                       | 0          | 2                                          | 0.4681        | 0(0-Inf)                 |
| NEOPLASM, MALIGNANT, ARM, SKIN, PRIMARY                  | 9                                       | 79.2033    | 190                                        | 78.0756       | 1.0144(0.5189-1.9834)    |
| NEOPLASM, MALIGNANT, ARM, SKIN, SECONDARY                | 0                                       | 0          | 1                                          | 0.853         | 0(0-Inf)                 |
| NEOPLASM, MALIGNANT, ARM, SOFT TISSUE, PRIMARY           | 0                                       | 0          | 2                                          | 0.7896        | 0(0-Inf)                 |
| NEOPLASM, MALIGNANT, ARTERY, SECONDARY                   | 0                                       | 0          | 6                                          | 1.949         | 0(0-Inf)                 |
| NEOPLASM, MALIGNANT, ARYEPIGLOTTIC, PRIMARY              | 0                                       | 0          | 2                                          | 1.0782        | 0(0-Inf)                 |
| NEOPLASM, MALIGNANT, ARYTENOID CARTILAGE, PRIMARY        | 0                                       | 0          | 3                                          | 1.9014        | 0(0-Inf)                 |
| NEOPLASM, MALIGNANT, AURICLE, SKIN, PRIMARY              | 1                                       | 13.0056    | 18                                         | 12.9968       | 1.0007(0.133-7.5294)     |
| NEOPLASM, MALIGNANT, AXILLA, SKIN, PRIMARY               | 0                                       | 0          | 6                                          | 2.7031        | 0(0-Inf)                 |
| NEOPLASM, MALIGNANT, AXILLA, SKIN, SECONDARY             | 1                                       | 9.5892     | 1                                          | 0.4936        | 19.4283(1.1543-326.9957) |
| NEOPLASM, MALIGNANT, AXILLA, SOFT TISSUE, SECONDARY      | 0                                       | 0          | 13                                         | 4.5145        | 0(0-Inf)                 |
| NEOPLASM, MALIGNANT, BACK, SKIN, PRIMARY                 | 16                                      | 129.2013   | 356                                        | 126.6273      | 1.0203(0.6174-1.6861)    |
| NEOPLASM, MALIGNANT, BACK, SKIN, SECONDARY               | 0                                       | 0          | 4                                          | 1.266         | 0(0-Inf)                 |
| NEOPLASM, MALIGNANT, BACK, SOFT TISSUE, PRIMARY          | 0                                       | 0          | 1                                          | 0.4048        | 0(0-Inf)                 |

| Description                                                 | No. of Positive Cases with Disease Code | Case Rate* | No. of Positive Controls with Disease Code | Control Rate* | Relative Risk (95%CI)    |
|-------------------------------------------------------------|-----------------------------------------|------------|--------------------------------------------|---------------|--------------------------|
| NEOPLASM, MALIGNANT, BACK, SOFT TISSUE, SECONDARY           | 0                                       | 0          | 3                                          | 2.0481        | 0(0-Inf)                 |
| NEOPLASM, MALIGNANT, BILIARY, NOS, PRIMARY                  | 0                                       | 0          | 7                                          | 2.5576        | 0(0-Inf)                 |
| NEOPLASM, MALIGNANT, BILIARY, NOS, SECONDARY                | 0                                       | 0          | 1                                          | 0.8877        | 0(0-Inf)                 |
| NEOPLASM, MALIGNANT, BLADDER, PRIMARY--NMBL                 | 17                                      | 194.2267   | 247                                        | 146.9015      | 1.3222(0.8076-2.1646)    |
| NEOPLASM, MALIGNANT, BLADDER, SECONDARY                     | 1                                       | 7.0083     | 41                                         | 11.652        | 0.6015(0.0825-4.3843)    |
| NEOPLASM, MALIGNANT, BONE MARROW, PRIMARY                   | 0                                       | 0          | 1                                          | 0.2354        | 0(0-Inf)                 |
| NEOPLASM, MALIGNANT, BONE MARROW, SECONDARY                 | 2                                       | 13.8725    | 3                                          | 0.7566        | 18.3359(2.9594-113.6067) |
| NEOPLASM, MALIGNANT, BONE, JAW, LOWER, PRIMARY              | 0                                       | 0          | 2                                          | 1.1614        | 0(0-Inf)                 |
| NEOPLASM, MALIGNANT, BONE, LONG, LOWER EXTREMITY, SECONDARY | 0                                       | 0          | 2                                          | 0.5908        | 0(0-Inf)                 |
| NEOPLASM, MALIGNANT, BONE, LONG, UPPER EXTREMITY, SECONDARY | 0                                       | 0          | 1                                          | 0.4048        | 0(0-Inf)                 |
| NEOPLASM, MALIGNANT, BONE, NOS, SECONDARY                   | 4                                       | 39.8731    | 138                                        | 68.7514       | 0.58(0.2143-1.5697)      |
| NEOPLASM, MALIGNANT, BONE, PELVIC GIRDLE, SECONDARY         | 0                                       | 0          | 9                                          | 3.1303        | 0(0-Inf)                 |
| NEOPLASM, MALIGNANT, BONE, SKULL, SECONDARY                 | 0                                       | 0          | 3                                          | 0.9772        | 0(0-Inf)                 |
| NEOPLASM, MALIGNANT, BOWEL, LARGE, NOS, SECONDARY           | 0                                       | 0          | 1                                          | 0.2354        | 0(0-Inf)                 |
| NEOPLASM, MALIGNANT, BOWEL, NOS, PRIMARY                    | 0                                       | 0          | 1                                          | 0.8528        | 0(0-Inf)                 |
| NEOPLASM, MALIGNANT, BOWEL, SMALL, NOS, PRIMARY             | 0                                       | 0          | 6                                          | 2.7033        | 0(0-Inf)                 |
| NEOPLASM, MALIGNANT, BOWEL, SMALL, NOS, SECONDARY           | 0                                       | 0          | 12                                         | 3.8435        | 0(0-Inf)                 |
| NEOPLASM, MALIGNANT, BRAIN STEM, PRIMARY                    | 0                                       | 0          | 1                                          | 0.8877        | 0(0-Inf)                 |
| NEOPLASM, MALIGNANT, BRAIN STEM, SECONDARY                  | 0                                       | 0          | 1                                          | 0.4048        | 0(0-Inf)                 |
| NEOPLASM, MALIGNANT, BRAIN, CEREBELLUM, PRIMARY             | 0                                       | 0          | 3                                          | 0.8873        | 0(0-Inf)                 |
| NEOPLASM, MALIGNANT, BRAIN, CEREBELLUM, SECONDARY           | 1                                       | 11.4251    | 6                                          | 3.6555        | 3.1255(0.3709-26.3379)   |
| NEOPLASM, MALIGNANT, BRAIN, CEREBRUM, PRIMARY               | 0                                       | 0          | 2                                          | 0.7896        | 0(0-Inf)                 |
| NEOPLASM, MALIGNANT, BRAIN, CEREBRUM, SECONDARY             | 0                                       | 0          | 1                                          | 0.2729        | 0(0-Inf)                 |
| NEOPLASM, MALIGNANT, BRAIN, CORPUS CALLOSUM, PRIMARY        | 0                                       | 0          | 1                                          | 0.3526        | 0(0-Inf)                 |
| NEOPLASM, MALIGNANT, BRAIN, FRONTAL LOBE, PRIMARY           | 0                                       | 0          | 13                                         | 3.3914        | 0(0-Inf)                 |
| NEOPLASM, MALIGNANT, BRAIN, FRONTAL LOBE, SECONDARY         | 1                                       | 7.2507     | 8                                          | 2.3153        | 3.1316(0.3849-25.483)    |
| NEOPLASM, MALIGNANT, BRAIN, NOS, PRIMARY                    | 0                                       | 0          | 19                                         | 8.8668        | 0(0-Inf)                 |
| NEOPLASM, MALIGNANT, BRAIN, NOS, SECONDARY                  | 5                                       | 39.3781    | 74                                         | 25.3441       | 1.5537(0.6256-3.8588)    |
| NEOPLASM, MALIGNANT, BRAIN, OCCIPITAL LOBE, PRIMARY         | 0                                       | 0          | 5                                          | 3.791         | 0(0-Inf)                 |
| NEOPLASM, MALIGNANT, BRAIN, OCCIPITAL LOBE, SECONDARY       | 0                                       | 0          | 3                                          | 0.746         | 0(0-Inf)                 |
| NEOPLASM, MALIGNANT, BRAIN, PARIETAL LOBE, PRIMARY          | 0                                       | 0          | 10                                         | 3.7984        | 0(0-Inf)                 |
| NEOPLASM, MALIGNANT, BRAIN, PARIETAL LOBE, SECONDARY        | 0                                       | 0          | 2                                          | 0.5474        | 0(0-Inf)                 |
| NEOPLASM, MALIGNANT, BRAIN, TEMPORAL LOBE, PRIMARY          | 0                                       | 0          | 7                                          | 2.6506        | 0(0-Inf)                 |
| NEOPLASM, MALIGNANT, BRAIN, TEMPORAL LOBE, SECONDARY        | 0                                       | 0          | 2                                          | 0.7896        | 0(0-Inf)                 |
| NEOPLASM, MALIGNANT, BREAST, PRIMARY, LEFT                  | 15                                      | 105.6953   | 426                                        | 108.102       | 0.9777(0.5832-1.6391)    |
| NEOPLASM, MALIGNANT, BREAST, PRIMARY, NOS                   | 23                                      | 175.2103   | 662                                        | 207.598       | 0.844(0.5562-1.2807)     |
| NEOPLASM, MALIGNANT, BREAST, PRIMARY, RIGHT                 | 15                                      | 107.1279   | 443                                        | 116.1458      | 0.9224(0.5505-1.5455)    |
| NEOPLASM, MALIGNANT, BREAST, SECONDARY                      | 0                                       | 0          | 7                                          | 1.7373        | 0(0-Inf)                 |



| Description                                                     | No. of Positive Cases with Disease Code | Case Rate* | No. of Positive Controls with Disease Code | Control Rate* | Relative Risk (95%CI)   |
|-----------------------------------------------------------------|-----------------------------------------|------------|--------------------------------------------|---------------|-------------------------|
| NEOPLASM, MALIGNANT, BREAST, SKIN, PRIMARY                      | 1                                       | 7.0844     | 19                                         | 5.0889        | 1.3921(0.1848-10.4872)  |
| NEOPLASM, MALIGNANT, BROAD LIGAMENT, SECONDARY                  | 1                                       | 7.7732     | 0                                          | 0             | 17330752774.6072(0-Inf) |
| NEOPLASM, MALIGNANT, BRONCHUS, PRIMARY                          | 1                                       | 8.6742     | 41                                         | 16.6121       | 0.5222(0.0716-3.8071)   |
| NEOPLASM, MALIGNANT, BRONCHUS, SECONDARY                        | 0                                       | 0          | 5                                          | 1.5258        | 0(0-Inf)                |
| NEOPLASM, MALIGNANT, BRONCHUS, UNSPECIFIED PRIMARY OR SECONDARY | 1                                       | 7.0493     | 12                                         | 3.2229        | 2.1872(0.2808-17.0401)  |
| NEOPLASM, MALIGNANT, BUCCAL COMMISSURE, PRIMARY                 | 0                                       | 0          | 1                                          | 0.8532        | 0(0-Inf)                |
| NEOPLASM, MALIGNANT, BUCCAL MUCOSA, PRIMARY                     | 0                                       | 0          | 8                                          | 4.2183        | 0(0-Inf)                |
| NEOPLASM, MALIGNANT, BUCCAL MUCOSA, SECONDARY                   | 0                                       | 0          | 1                                          | 0.8878        | 0(0-Inf)                |
| NEOPLASM, MALIGNANT, BUTTOCK, SKIN, PRIMARY                     | 0                                       | 0          | 4                                          | 1.9685        | 0(0-Inf)                |
| NEOPLASM, MALIGNANT, BUTTOCK, SKIN, SECONDARY                   | 0                                       | 0          | 1                                          | 0.234         | 0(0-Inf)                |
| NEOPLASM, MALIGNANT, CANTHI, SKIN, PRIMARY                      | 5                                       | 40.7901    | 104                                        | 37.9668       | 1.0744(0.4368-2.6428)   |
| NEOPLASM, MALIGNANT, CANTHI, SKIN, SECONDARY                    | 0                                       | 0          | 1                                          | 0.234         | 0(0-Inf)                |
| NEOPLASM, MALIGNANT, CARDIA, PRIMARY                            | 1                                       | 10.9451    | 6                                          | 3.4264        | 3.1943(0.3798-26.865)   |
| NEOPLASM, MALIGNANT, CARDIA, SECONDARY                          | 0                                       | 0          | 1                                          | 0.3526        | 0(0-Inf)                |
| NEOPLASM, MALIGNANT, CARINA, PRIMARY                            | 0                                       | 0          | 6                                          | 3.5914        | 0(0-Inf)                |
| NEOPLASM, MALIGNANT, CARINA, SECONDARY                          | 1                                       | 11.212     | 0                                          | 0             | 7456255103.6365(0-Inf)  |
| NEOPLASM, MALIGNANT, CECUM, PRIMARY                             | 6                                       | 72.975     | 88                                         | 58.2483       | 1.2528(0.5465-2.8719)   |
| NEOPLASM, MALIGNANT, CECUM, SECONDARY                           | 0                                       | 0          | 8                                          | 2.7265        | 0(0-Inf)                |
| NEOPLASM, MALIGNANT, CEREBRAL, PRIMARY                          | 0                                       | 0          | 3                                          | 0.9164        | 0(0-Inf)                |
| NEOPLASM, MALIGNANT, CEREBRAL, SECONDARY                        | 0                                       | 0          | 8                                          | 2.2521        | 0(0-Inf)                |
| NEOPLASM, MALIGNANT, CEREBRAL, VENTRICLE, SECONDARY             | 0                                       | 0          | 1                                          | 0.2354        | 0(0-Inf)                |
| NEOPLASM, MALIGNANT, CERVIX, IN SITU, PRIMARY                   | 3                                       | 59.2046    | 37                                         | 17.4514       | 3.3925(1.0381-11.0873)  |
| NEOPLASM, MALIGNANT, CERVIX, INVASIVE, PRIMARY                  | 0                                       | 0          | 6                                          | 1.3433        | 0(0-Inf)                |
| NEOPLASM, MALIGNANT, CERVIX, INVASIVE, SECONDARY                | 0                                       | 0          | 1                                          | 0.4048        | 0(0-Inf)                |
| NEOPLASM, MALIGNANT, CERVIX, NOS, PRIMARY                       | 3                                       | 41.4653    | 29                                         | 13.8422       | 2.9956(0.9032-9.9352)   |
| NEOPLASM, MALIGNANT, CERVIX, NOS, SECONDARY                     | 0                                       | 0          | 5                                          | 1.1154        | 0(0-Inf)                |
| NEOPLASM, MALIGNANT, CHEEK (INSIDE), PRIMARY                    | 0                                       | 0          | 3                                          | 0.8018        | 0(0-Inf)                |
| NEOPLASM, MALIGNANT, CHEEK, SKIN, PRIMARY                       | 40                                      | 423.0263   | 711                                        | 366.8917      | 1.153(0.8378-1.5868)    |
| NEOPLASM, MALIGNANT, CHEEK, SKIN, SECONDARY                     | 0                                       | 0          | 7                                          | 7.4095        | 0(0-Inf)                |
| NEOPLASM, MALIGNANT, CHEST WALL, NOS, SOFT TISSUE, PRIMARY      | 0                                       | 0          | 9                                          | 2.0674        | 0(0-Inf)                |
| NEOPLASM, MALIGNANT, CHEST WALL, NOS, SOFT TISSUE, SECOND       | 3                                       | 21.1006    | 53                                         | 14.0125       | 1.5058(0.468-4.8455)    |
| NEOPLASM, MALIGNANT, CHEST WALL, SKIN, PRIMARY                  | 16                                      | 131.5625   | 240                                        | 88.3299       | 1.4894(0.8962-2.4753)   |
| NEOPLASM, MALIGNANT, CHEST WALL, SKIN, SECONDARY                | 1                                       | 6.9926     | 18                                         | 4.6366        | 1.5082(0.1994-11.4066)  |
| NEOPLASM, MALIGNANT, CHIN, SKIN, PRIMARY                        | 2                                       | 17.5506    | 93                                         | 38.0321       | 0.4615(0.1135-1.8763)   |
| NEOPLASM, MALIGNANT, CHIN, SKIN, SECONDARY                      | 0                                       | 0          | 1                                          | 0.3526        | 0(0-Inf)                |
| NEOPLASM, MALIGNANT, CLAVICLE, PRIMARY                          | 1                                       | 7.1491     | 4                                          | 0.9451        | 7.5646(0.819-69.8717)   |
| NEOPLASM, MALIGNANT, CLAVICLE, SECONDARY                        | 0                                       | 0          | 3                                          | 0.8709        | 0(0-Inf)                |

| Description                                          | No. of Positive Cases with Disease Code | Case Rate* | No. of Positive Controls with Disease Code | Control Rate* | Relative Risk (95%CI)  |
|------------------------------------------------------|-----------------------------------------|------------|--------------------------------------------|---------------|------------------------|
| NEOPLASM, MALIGNANT, CLITORIS, PRIMARY               | 0                                       | 0          | 1                                          | 0.2354        | 0(0-Inf)               |
| NEOPLASM, MALIGNANT, COCCYX, SECONDARY               | 0                                       | 0          | 1                                          | 0.8877        | 0(0-Inf)               |
| NEOPLASM, MALIGNANT, COLON, ASCENDING, PRIMARY       | 5                                       | 56.8599    | 91                                         | 54.5863       | 1.0417(0.4223-2.5691)  |
| NEOPLASM, MALIGNANT, COLON, ASCENDING, SECONDARY     | 0                                       | 0          | 1                                          | 0.2354        | 0(0-Inf)               |
| NEOPLASM, MALIGNANT, COLON, DESCENDING, PRIMARY      | 1                                       | 9.3005     | 22                                         | 9.8536        | 0.9439(0.1265-7.0403)  |
| NEOPLASM, MALIGNANT, COLON, DESCENDING, SECONDARY    | 0                                       | 0          | 4                                          | 0.8812        | 0(0-Inf)               |
| NEOPLASM, MALIGNANT, COLON, HEPATIC FLEXURE, PRIMARY | 2                                       | 22.7932    | 20                                         | 12.1978       | 1.8686(0.4339-8.048)   |
| NEOPLASM, MALIGNANT, COLON, LEFT, PRIMARY            | 0                                       | 0          | 3                                          | 2.0488        | 0(0-Inf)               |
| NEOPLASM, MALIGNANT, COLON, NOS, PRIMARY             | 20                                      | 246.4268   | 288                                        | 193.0766      | 1.2763(0.81-2.011)     |
| NEOPLASM, MALIGNANT, COLON, NOS, SECONDARY           | 1                                       | 7.9925     | 7                                          | 2.4523        | 3.2592(0.394-26.9635)  |
| NEOPLASM, MALIGNANT, COLON, RIGHT, PRIMARY           | 2                                       | 22.0802    | 27                                         | 15.663        | 1.4097(0.3335-5.9595)  |
| NEOPLASM, MALIGNANT, COLON, SIGMOID FLEXURE, PRIMARY | 0                                       | 0          | 2                                          | 0.432         | 0(0-Inf)               |
| NEOPLASM, MALIGNANT, COLON, SIGMOID, PRIMARY         | 5                                       | 42.0594    | 100                                        | 38.2825       | 1.0987(0.4463-2.7049)  |
| NEOPLASM, MALIGNANT, COLON, SIGMOID, SECONDARY       | 2                                       | 13.8667    | 19                                         | 4.3501        | 3.1877(0.7329-13.8642) |
| NEOPLASM, MALIGNANT, COLON, SPLENIC FLEXURE, PRIMARY | 2                                       | 23.2491    | 17                                         | 10.6026       | 2.1928(0.5028-9.5625)  |
| NEOPLASM, MALIGNANT, COLON, TRANSVERSE, PRIMARY      | 3                                       | 30.7074    | 43                                         | 22.4159       | 1.3699(0.4231-4.4349)  |
| NEOPLASM, MALIGNANT, COLON, TRANSVERSE, SECONDARY    | 0                                       | 0          | 8                                          | 2.0795        | 0(0-Inf)               |
| NEOPLASM, MALIGNANT, COLORECTAL, PRIMARY             | 1                                       | 9.7837     | 34                                         | 16.4694       | 0.5941(0.0811-4.3537)  |
| NEOPLASM, MALIGNANT, COLORECTAL, SECONDARY           | 0                                       | 0          | 1                                          | 0.8877        | 0(0-Inf)               |
| NEOPLASM, MALIGNANT, COMMISSURE (LIP), PRIMARY       | 0                                       | 0          | 1                                          | 0.8878        | 0(0-Inf)               |
| NEOPLASM, MALIGNANT, COMMISSURE (LIP), SECONDARY     | 0                                       | 0          | 1                                          | 0.4751        | 0(0-Inf)               |
| NEOPLASM, MALIGNANT, COMMON BILE DUCT, PRIMARY       | 0                                       | 0          | 7                                          | 3.5091        | 0(0-Inf)               |
| NEOPLASM, MALIGNANT, CONJUNCTIVA, PRIMARY            | 1                                       | 11.1299    | 4                                          | 2.328         | 4.781(0.5252-43.5189)  |
| NEOPLASM, MALIGNANT, CORNEA, PRIMARY                 | 0                                       | 0          | 2                                          | 1.7781        | 0(0-Inf)               |
| NEOPLASM, MALIGNANT, CUL-DE-SAC, PRIMARY             | 0                                       | 0          | 6                                          | 1.4127        | 0(0-Inf)               |
| NEOPLASM, MALIGNANT, CUL-DE-SAC, SECONDARY           | 1                                       | 14.3826    | 15                                         | 6.5377        | 2.2(0.287-16.8639)     |
| NEOPLASM, MALIGNANT, DIAPHRAGM, SECONDARY            | 0                                       | 0          | 5                                          | 1.2605        | 0(0-Inf)               |
| NEOPLASM, MALIGNANT, DUODENUM, PRIMARY               | 0                                       | 0          | 10                                         | 4.366         | 0(0-Inf)               |
| NEOPLASM, MALIGNANT, DUODENUM, SECONDARY             | 0                                       | 0          | 3                                          | 0.9164        | 0(0-Inf)               |
| NEOPLASM, MALIGNANT, EAR, MIDDLE, PRIMARY            | 0                                       | 0          | 2                                          | 1.7757        | 0(0-Inf)               |
| NEOPLASM, MALIGNANT, EAR, PRIMARY, NOS               | 0                                       | 0          | 7                                          | 6.2168        | 0(0-Inf)               |
| NEOPLASM, MALIGNANT, EAR, SKIN, PRIMARY              | 21                                      | 282.4169   | 352                                        | 261.734       | 1.079(0.694-1.6776)    |
| NEOPLASM, MALIGNANT, ENDOCERVIX, IN SITU, PRIMARY    | 1                                       | 7.0698     | 5                                          | 1.1014        | 6.4191(0.7268-56.6933) |
| NEOPLASM, MALIGNANT, ENDOCERVIX, INVASIVE, SECONDARY | 0                                       | 0          | 1                                          | 0.398         | 0(0-Inf)               |
| NEOPLASM, MALIGNANT, ENDOCERVIX, NEC, PRIMARY        | 0                                       | 0          | 1                                          | 0.2354        | 0(0-Inf)               |
| NEOPLASM, MALIGNANT, ENDOCERVIX, NEC, SECONDARY      | 0                                       | 0          | 3                                          | 0.9776        | 0(0-Inf)               |
| NEOPLASM, MALIGNANT, ENDOCRINE, NEC, PRIMARY         | 0                                       | 0          | 1                                          | 0.3526        | 0(0-Inf)               |
| NEOPLASM, MALIGNANT, ENDOMETRIUM, PRIMARY            | 2                                       | 27.644     | 102                                        | 49.4494       | 0.559(0.1376-2.272)    |
| NEOPLASM, MALIGNANT, ENDOMETRIUM, SECONDARY          | 0                                       | 0          | 3                                          | 0.8114        | 0(0-Inf)               |
| NEOPLASM, MALIGNANT, EPIDIDYMIS, PRIMARY             | 0                                       | 0          | 1                                          | 0.2729        | 0(0-Inf)               |

| Description                                                       | No. of Positive Cases with Disease Code | Case Rate* | No. of Positive Controls with Disease Code | Control Rate* | Relative Risk (95%CI)   |
|-------------------------------------------------------------------|-----------------------------------------|------------|--------------------------------------------|---------------|-------------------------|
| NEOPLASM, MALIGNANT, EPIGLOTTIS, NOS, PRIMARY                     | 0                                       | 0          | 12                                         | 3.3639        | 0(0-Inf)                |
| NEOPLASM, MALIGNANT, ESOPHAGOGASTRIC JUNCTION, PRIMARY            | 1                                       | 16.4517    | 12                                         | 9.2911        | 1.7707(0.2286-13.7164)  |
| NEOPLASM, MALIGNANT, ESOPHAGUS, LOWER THIRD (DISTAL), PRIMARY     | 2                                       | 19.7326    | 18                                         | 8.9095        | 2.2148(0.5104-9.6097)   |
| NEOPLASM, MALIGNANT, ESOPHAGUS, MIDDLE THIRD, PRIM                | 0                                       | 0          | 4                                          | 1.3219        | 0(0-Inf)                |
| NEOPLASM, MALIGNANT, ESOPHAGUS, NOS, PRIMARY                      | 1                                       | 10.8239    | 46                                         | 25.8256       | 0.4191(0.0577-3.0453)   |
| NEOPLASM, MALIGNANT, ESOPHAGUS, NOS, SECONDARY                    | 0                                       | 0          | 4                                          | 2.3946        | 0(0-Inf)                |
| NEOPLASM, MALIGNANT, ESOPHAGUS, UPPER THIRD (PROXIMAL), PRIMARY   | 1                                       | 9.7089     | 4                                          | 1.9291        | 5.0329(0.552-45.8888)   |
| NEOPLASM, MALIGNANT, ESOPHAGUS, UPPER THIRD (PROXIMAL), SECONDARY | 0                                       | 0          | 1                                          | 1.9071        | 0(0-Inf)                |
| NEOPLASM, MALIGNANT, EXTERNAL MEATUS, (ACOUSTIC), SKIN, PRIMARY   | 0                                       | 0          | 1                                          | 0.888         | 0(0-Inf)                |
| NEOPLASM, MALIGNANT, EXTRARECTAL, SECONDARY                       | 0                                       | 0          | 1                                          | 2.4855        | 0(0-Inf)                |
| NEOPLASM, MALIGNANT, EYE, NEC, PRIMARY                            | 0                                       | 0          | 1                                          | 0.2354        | 0(0-Inf)                |
| NEOPLASM, MALIGNANT, EYE, PRIMARY                                 | 0                                       | 0          | 5                                          | 3.9089        | 0(0-Inf)                |
| NEOPLASM, MALIGNANT, EYE, SECONDARY                               | 1                                       | 6.8765     | 0                                          | 0             | 12220559077.7847(0-Inf) |
| NEOPLASM, MALIGNANT, EYEBROW, SKIN, PRIMARY                       | 4                                       | 42.7554    | 102                                        | 55.9549       | 0.7641(0.2808-2.0792)   |
| NEOPLASM, MALIGNANT, EYELID, SKIN, PRIMARY                        | 6                                       | 50.4202    | 149                                        | 56.9447       | 0.8854(0.3907-2.0067)   |
| NEOPLASM, MALIGNANT, EYELID, SKIN, SECONDARY                      | 0                                       | 0          | 1                                          | 0.2729        | 0(0-Inf)                |
| NEOPLASM, MALIGNANT, FACE, SKIN, NEC, PRIMARY                     | 34                                      | 311.8095   | 410                                        | 171.3549      | 1.8197(1.2807-2.5855)   |
| NEOPLASM, MALIGNANT, FACE, SKIN, NEC, SECONDARY                   | 0                                       | 0          | 5                                          | 1.2297        | 0(0-Inf)                |
| NEOPLASM, MALIGNANT, FALLOPIAN TUBE, PRIMARY                      | 0                                       | 0          | 14                                         | 6.7632        | 0(0-Inf)                |
| NEOPLASM, MALIGNANT, FALLOPIAN TUBE, SECONDARY                    | 0                                       | 0          | 10                                         | 2.1693        | 0(0-Inf)                |
| NEOPLASM, MALIGNANT, FEMUR, SECONDARY                             | 0                                       | 0          | 26                                         | 10.2023       | 0(0-Inf)                |
| NEOPLASM, MALIGNANT, FINGER, SKIN, PRIMARY                        | 1                                       | 9.9195     | 46                                         | 22.736        | 0.4363(0.06-3.1713)     |
| NEOPLASM, MALIGNANT, FINGER, SOFT TISSUE, PRIMARY                 | 0                                       | 0          | 1                                          | 0.888         | 0(0-Inf)                |
| NEOPLASM, MALIGNANT, FLANK, SKIN, PRIMARY                         | 1                                       | 7.1912     | 19                                         | 5.7181        | 1.2576(0.1673-9.4518)   |
| NEOPLASM, MALIGNANT, FOOT, SKIN, PRIMARY                          | 0                                       | 0          | 10                                         | 2.6637        | 0(0-Inf)                |
| NEOPLASM, MALIGNANT, FOREARM, SKIN, PRIMARY                       | 5                                       | 49.1989    | 207                                        | 100.8687      | 0.4878(0.2006-1.1857)   |
| NEOPLASM, MALIGNANT, FOREARM, SKIN, SECONDARY                     | 0                                       | 0          | 1                                          | 0.2729        | 0(0-Inf)                |
| NEOPLASM, MALIGNANT, FOREARM, SOFT TISSUE, PRIMARY                | 0                                       | 0          | 3                                          | 0.6549        | 0(0-Inf)                |
| NEOPLASM, MALIGNANT, FOREHEAD, SKIN, PRIMARY                      | 21                                      | 190.7165   | 490                                        | 209.2407      | 0.9115(0.5883-1.4123)   |
| NEOPLASM, MALIGNANT, FOREHEAD, SKIN, SECONDARY                    | 0                                       | 0          | 1                                          | 0.2354        | 0(0-Inf)                |
| NEOPLASM, MALIGNANT, GALLBLADDER, PRIMARY                         | 0                                       | 0          | 10                                         | 2.7643        | 0(0-Inf)                |
| NEOPLASM, MALIGNANT, GASTROINTESTINAL TRACT, NEC/NOS, SECONDARY   | 0                                       | 0          | 1                                          | 0.2354        | 0(0-Inf)                |
| NEOPLASM, MALIGNANT, GASTROINTESTINAL TRACT, NOS, PRIMARY         | 0                                       | 0          | 3                                          | 0.9772        | 0(0-Inf)                |

| Description                                              | No. of Positive Cases with Disease Code | Case Rate* | No. of Positive Controls with Disease Code | Control Rate* | Relative Risk (95%CI)    |
|----------------------------------------------------------|-----------------------------------------|------------|--------------------------------------------|---------------|--------------------------|
| NEOPLASM, MALIGNANT, GENITAL, FEMALE, NEC, PRIMARY       | 0                                       | 0          | 2                                          | 1.1621        | 0(0-Inf)                 |
| NEOPLASM, MALIGNANT, GENITAL, FEMALE, NEC, SECONDARY     | 0                                       | 0          | 1                                          | 0.234         | 0(0-Inf)                 |
| NEOPLASM, MALIGNANT, GENITAL, MALE, NEC, PRIMARY         | 0                                       | 0          | 1                                          | 2.4856        | 0(0-Inf)                 |
| NEOPLASM, MALIGNANT, GENITAL, MALE, NEC, SECONDARY       | 0                                       | 0          | 1                                          | 0.3526        | 0(0-Inf)                 |
| NEOPLASM, MALIGNANT, GENITAL, MALE, NOS, PRIMARY         | 0                                       | 0          | 1                                          | 2.4857        | 0(0-Inf)                 |
| NEOPLASM, MALIGNANT, GINGIVA, GUM, NOS, PRIMARY          | 0                                       | 0          | 3                                          | 3.774         | 0(0-Inf)                 |
| NEOPLASM, MALIGNANT, GINGIVA, LOWER GUM, PRIMARY         | 0                                       | 0          | 2                                          | 0.8096        | 0(0-Inf)                 |
| NEOPLASM, MALIGNANT, GLOTTIS, PRIMARY                    | 0                                       | 0          | 7                                          | 3.6774        | 0(0-Inf)                 |
| NEOPLASM, MALIGNANT, GROIN, SKIN, PRIMARY                | 0                                       | 0          | 5                                          | 2.7717        | 0(0-Inf)                 |
| NEOPLASM, MALIGNANT, GROIN, SKIN, SECONDARY              | 0                                       | 0          | 1                                          | 0.3526        | 0(0-Inf)                 |
| NEOPLASM, MALIGNANT, GROIN, SOFT TISSUE, PRIMARY         | 0                                       | 0          | 2                                          | 0.7896        | 0(0-Inf)                 |
| NEOPLASM, MALIGNANT, GROIN, SOFT TISSUE, SECONDARY       | 0                                       | 0          | 5                                          | 2.2755        | 0(0-Inf)                 |
| NEOPLASM, MALIGNANT, GUM, LOWER, PRIMARY                 | 0                                       | 0          | 1                                          | 0.8532        | 0(0-Inf)                 |
| NEOPLASM, MALIGNANT, GUM, NOS, PRIMARY                   | 0                                       | 0          | 1                                          | 0.8528        | 0(0-Inf)                 |
| NEOPLASM, MALIGNANT, HAND, SKIN, PRIMARY                 | 10                                      | 105.0552   | 193                                        | 101.5527      | 1.0345(0.547-1.9564)     |
| NEOPLASM, MALIGNANT, HAND, SKIN, SECONDARY               | 0                                       | 0          | 1                                          | 0.4048        | 0(0-Inf)                 |
| NEOPLASM, MALIGNANT, HAND, SOFT TISSUE, PRIMARY          | 0                                       | 0          | 1                                          | 0.3526        | 0(0-Inf)                 |
| NEOPLASM, MALIGNANT, HEAD AND NECK, UNSPECIFIED, PRIMARY | 1                                       | 10.6693    | 26                                         | 14.2699       | 0.7477(0.1011-5.5307)    |
| NEOPLASM, MALIGNANT, HEAD, SKIN, PRIMARY                 | 0                                       | 0          | 23                                         | 18.4262       | 0(0-Inf)                 |
| NEOPLASM, MALIGNANT, HEAD, SKIN, SECONDARY               | 0                                       | 0          | 2                                          | 0.5708        | 0(0-Inf)                 |
| NEOPLASM, MALIGNANT, HEAD, SOFT TISSUE, PRIMARY          | 1                                       | 10.0353    | 7                                          | 3.5185        | 2.8522(0.3463-23.4907)   |
| NEOPLASM, MALIGNANT, HEAD, SOFT TISSUE, SECONDARY        | 2                                       | 21.0463    | 3                                          | 1.6181        | 13.0068(2.1247-79.6231)  |
| NEOPLASM, MALIGNANT, HEART, SECONDARY                    | 0                                       | 0          | 1                                          | 0.2354        | 0(0-Inf)                 |
| NEOPLASM, MALIGNANT, HEPATIC BILE DUCT, PRIMARY          | 0                                       | 0          | 1                                          | 0.3526        | 0(0-Inf)                 |
| NEOPLASM, MALIGNANT, HIP, SKIN, PRIMARY                  | 0                                       | 0          | 3                                          | 1.2151        | 0(0-Inf)                 |
| NEOPLASM, MALIGNANT, HIP, SOFT TISSUE, SECONDARY         | 2                                       | 15.8916    | 3                                          | 1.0358        | 15.3427(2.478-94.9935)   |
| NEOPLASM, MALIGNANT, HUMERUS, SECONDARY                  | 0                                       | 0          | 6                                          | 3.5916        | 0(0-Inf)                 |
| NEOPLASM, MALIGNANT, HYPOPHARYNX, NEC, PRIMARY           | 0                                       | 0          | 1                                          | 0.8877        | 0(0-Inf)                 |
| NEOPLASM, MALIGNANT, HYPOPHARYNX, NOS, PRIMARY           | 0                                       | 0          | 2                                          | 0.7051        | 0(0-Inf)                 |
| NEOPLASM, MALIGNANT, ILEOCECAL VALVE, PRIMARY            | 1                                       | 9.8522     | 17                                         | 8.3335        | 1.1822(0.1563-8.9435)    |
| NEOPLASM, MALIGNANT, ILEOCECAL VALVE, SECONDARY          | 0                                       | 0          | 1                                          | 0.4048        | 0(0-Inf)                 |
| NEOPLASM, MALIGNANT, ILEUM (INTESTINE), PRIMARY          | 2                                       | 17.8258    | 14                                         | 5.8723        | 3.0356(0.6823-13.5052)   |
| NEOPLASM, MALIGNANT, ILEUM (INTESTINE), SECONDARY        | 0                                       | 0          | 9                                          | 2.2112        | 0(0-Inf)                 |
| NEOPLASM, MALIGNANT, ILIUM (BONE), SECONDARY             | 0                                       | 0          | 7                                          | 3.509         | 0(0-Inf)                 |
| NEOPLASM, MALIGNANT, INTESTINE, LARGE, NOS, PRIMARY      | 0                                       | 0          | 1                                          | 0.3526        | 0(0-Inf)                 |
| NEOPLASM, MALIGNANT, INTESTINE, NOS, PRIMARY             | 1                                       | 7.1095     | 1                                          | 0.219         | 32.4708(1.8913-557.4741) |
| NEOPLASM, MALIGNANT, INTESTINE, SMALL, PRIMARY           | 0                                       | 0          | 3                                          | 1.2145        | 0(0-Inf)                 |
| NEOPLASM, MALIGNANT, INTESTINE, SMALL, SECONDARY         | 0                                       | 0          | 3                                          | 1.5755        | 0(0-Inf)                 |
| NEOPLASM, MALIGNANT, INTRA-ABDOMINAL, PRIMARY            | 0                                       | 0          | 3                                          | 2.8226        | 0(0-Inf)                 |

| Description                                                  | No. of Positive Cases with Disease Code | Case Rate* | No. of Positive Controls with Disease Code | Control Rate* | Relative Risk (95%CI)  |
|--------------------------------------------------------------|-----------------------------------------|------------|--------------------------------------------|---------------|------------------------|
| NEOPLASM, MALIGNANT, INTRA-ABDOMINAL, SECONDARY              | 0                                       | 0          | 6                                          | 2.4212        | 0(0-Inf)               |
| NEOPLASM, MALIGNANT, ISCHIUM, PRIMARY                        | 0                                       | 0          | 2                                          | 0.5709        | 0(0-Inf)               |
| NEOPLASM, MALIGNANT, ISCHIUM, SECONDARY                      | 0                                       | 0          | 3                                          | 1.5107        | 0(0-Inf)               |
| NEOPLASM, MALIGNANT, JEJUNUM, PRIMARY                        | 0                                       | 0          | 1                                          | 0.4048        | 0(0-Inf)               |
| NEOPLASM, MALIGNANT, KIDNEY, EXCEPT PELVIS, PRIMARY          | 6                                       | 58.8635    | 80                                         | 38.8103       | 1.5167(0.6597-3.4872)  |
| NEOPLASM, MALIGNANT, KIDNEY, EXCEPT PELVIS, SECONDARY        | 0                                       | 0          | 3                                          | 3.8493        | 0(0-Inf)               |
| NEOPLASM, MALIGNANT, KIDNEY, PELVIS, PRIMARY                 | 0                                       | 0          | 27                                         | 11.3772       | 0(0-Inf)               |
| NEOPLASM, MALIGNANT, KIDNEY, PELVIS, SECONDARY               | 0                                       | 0          | 3                                          | 2.0475        | 0(0-Inf)               |
| NEOPLASM, MALIGNANT, KNEE, SKIN, PRIMARY                     | 1                                       | 9.6287     | 11                                         | 5.2531        | 1.8329(0.2341-14.3487) |
| NEOPLASM, MALIGNANT, LABIA, PRIMARY                          | 0                                       | 0          | 4                                          | 1.1822        | 0(0-Inf)               |
| NEOPLASM, MALIGNANT, LABIA, SECONDARY                        | 0                                       | 0          | 1                                          | 0.4052        | 0(0-Inf)               |
| NEOPLASM, MALIGNANT, LARYNGEAL CARTILAGE, PRIMARY            | 0                                       | 0          | 1                                          | 0.3526        | 0(0-Inf)               |
| NEOPLASM, MALIGNANT, LARYNX, NEC, PRIMARY                    | 0                                       | 0          | 11                                         | 3.9749        | 0(0-Inf)               |
| NEOPLASM, MALIGNANT, LARYNX, NEC, SECONDARY                  | 0                                       | 0          | 1                                          | 0.2729        | 0(0-Inf)               |
| NEOPLASM, MALIGNANT, LARYNX, NOS, PRIMARY                    | 2                                       | 17.6974    | 22                                         | 9.2956        | 1.9038(0.445-8.1458)   |
| NEOPLASM, MALIGNANT, LARYNX, NOS, SECONDARY                  | 0                                       | 0          | 2                                          | 1.1972        | 0(0-Inf)               |
| NEOPLASM, MALIGNANT, LEG, SKIN, PRIMARY                      | 6                                       | 47.1521    | 185                                        | 62.7785       | 0.7511(0.3325-1.6969)  |
| NEOPLASM, MALIGNANT, LEG, SOFT TISSUE, PRIMARY               | 0                                       | 0          | 8                                          | 2.4863        | 0(0-Inf)               |
| NEOPLASM, MALIGNANT, LEPTOMENINGEAL                          | 0                                       | 0          | 5                                          | 1.5258        | 0(0-Inf)               |
| NEOPLASM, MALIGNANT, LINGUAL (TONSIL), SECONDARY             | 0                                       | 0          | 1                                          | 0.2354        | 0(0-Inf)               |
| NEOPLASM, MALIGNANT, LIP, LOWER, SOFT TISSUE, PRIMARY        | 2                                       | 15.1719    | 6                                          | 1.9467        | 7.7937(1.5397-39.45)   |
| NEOPLASM, MALIGNANT, LIP, LOWER, SOFT TISSUE, SECONDARY      | 0                                       | 0          | 1                                          | 0.8532        | 0(0-Inf)               |
| NEOPLASM, MALIGNANT, LIP, NOS, PRIMARY                       | 1                                       | 10.216     | 22                                         | 11.327        | 0.9019(0.121-6.7241)   |
| NEOPLASM, MALIGNANT, LIP, SKIN, PRIMARY                      | 15                                      | 130.7266   | 270                                        | 108.8471      | 1.201(0.7128-2.0236)   |
| NEOPLASM, MALIGNANT, LIP, UPPER, SOFT TISSUE, PRIMARY        | 0                                       | 0          | 5                                          | 1.94          | 0(0-Inf)               |
| NEOPLASM, MALIGNANT, LIVER, NOS                              | 0                                       | 0          | 4                                          | 2.4125        | 0(0-Inf)               |
| NEOPLASM, MALIGNANT, LIVER, PRIMARY                          | 3                                       | 26.2418    | 17                                         | 6.96          | 3.7704(1.0942-12.9916) |
| NEOPLASM, MALIGNANT, LIVER, SECONDARY                        | 8                                       | 68.0553    | 157                                        | 61.1725       | 1.1125(0.5455-2.269)   |
| NEOPLASM, MALIGNANT, LOWER EXTREMITY, SKIN, PRIMARY          | 0                                       | 0          | 22                                         | 9.2759        | 0(0-Inf)               |
| NEOPLASM, MALIGNANT, LOWER EXTREMITY, SOFT TISSUE, PRIMARY   | 0                                       | 0          | 2                                          | 1.8978        | 0(0-Inf)               |
| NEOPLASM, MALIGNANT, LOWER EXTREMITY, SOFT TISSUE, SECONDARY | 0                                       | 0          | 3                                          | 0.7884        | 0(0-Inf)               |
| NEOPLASM, MALIGNANT, LUNG, PRIMARY                           | 30                                      | 275.7824   | 427                                        | 187.4961      | 1.4709(1.0143-2.1329)  |
| NEOPLASM, MALIGNANT, LUNG, SECONDARY                         | 7                                       | 59.6242    | 138                                        | 53.8776       | 1.1067(0.5166-2.3706)  |
| NEOPLASM, MALIGNANT, LUNG, UNSPECIFIED, PRIMARY OR SECONDARY | 0                                       | 0          | 8                                          | 5.1759        | 0(0-Inf)               |
| NEOPLASM, MALIGNANT, LYMPH NODE, AORTIC, SECONDARY           | 0                                       | 0          | 5                                          | 2.035         | 0(0-Inf)               |
| NEOPLASM, MALIGNANT, LYMPH NODE, AXILLA, SECONDARY           | 2                                       | 13.8767    | 150                                        | 34.5531       | 0.4016(0.0993-1.6237)  |
| NEOPLASM, MALIGNANT, LYMPH NODE, BRACHIAL, SECONDARY         | 1                                       | 11.6778    | 0                                          | 0             | 8833801493.4374(0-Inf) |

| Description                                                  | No. of Positive Cases with Disease Code | Case Rate* | No. of Positive Controls with Disease Code | Control Rate* | Relative Risk (95%CI)  |
|--------------------------------------------------------------|-----------------------------------------|------------|--------------------------------------------|---------------|------------------------|
| NEOPLASM, MALIGNANT, LYMPH NODE, BRONCHOPULMONARY, SECONDARY | 1                                       | 7.2113     | 24                                         | 6.978         | 1.0334(0.139-7.6818)   |
| NEOPLASM, MALIGNANT, LYMPH NODE, CARINA, NOS                 | 0                                       | 0          | 1                                          | 0.8877        | 0(0-Inf)               |
| NEOPLASM, MALIGNANT, LYMPH NODE, CARINA, SECONDARY           | 1                                       | 6.9333     | 9                                          | 2.2363        | 3.1003(0.3864-24.8775) |
| NEOPLASM, MALIGNANT, LYMPH NODE, CELIAC, SECONDARY           | 0                                       | 0          | 1                                          | 0.2729        | 0(0-Inf)               |
| NEOPLASM, MALIGNANT, LYMPH NODE, CERVICAL, NOS               | 0                                       | 0          | 1                                          | 0.3526        | 0(0-Inf)               |
| NEOPLASM, MALIGNANT, LYMPH NODE, CERVICAL, SECONDARY         | 0                                       | 0          | 15                                         | 4.6815        | 0(0-Inf)               |
| NEOPLASM, MALIGNANT, LYMPH NODE, GROIN, SECONDARY            | 0                                       | 0          | 3                                          | 1.2105        | 0(0-Inf)               |
| NEOPLASM, MALIGNANT, LYMPH NODE, HEAD, SECONDARY             | 0                                       | 0          | 2                                          | 1.0782        | 0(0-Inf)               |
| NEOPLASM, MALIGNANT, LYMPH NODE, HILAR, SECONDARY            | 0                                       | 0          | 9                                          | 3.7572        | 0(0-Inf)               |
| NEOPLASM, MALIGNANT, LYMPH NODE, ILIAC, SECONDARY            | 0                                       | 0          | 9                                          | 2.528         | 0(0-Inf)               |
| NEOPLASM, MALIGNANT, LYMPH NODE, INGUINAL, NOS               | 0                                       | 0          | 3                                          | 0.9165        | 0(0-Inf)               |
| NEOPLASM, MALIGNANT, LYMPH NODE, INGUINAL, SECONDARY         | 1                                       | 8.6558     | 11                                         | 4.4327        | 1.9527(0.2495-15.2805) |
| NEOPLASM, MALIGNANT, LYMPH NODE, INTESTINAL, NOS             | 0                                       | 0          | 1                                          | 0.2729        | 0(0-Inf)               |
| NEOPLASM, MALIGNANT, LYMPH NODE, INTESTINAL, SECONDARY       | 4                                       | 33.8933    | 81                                         | 31.2821       | 1.0835(0.3958-2.9661)  |
| NEOPLASM, MALIGNANT, LYMPH NODE, INTRA-ABDOMINAL, NOS        | 0                                       | 0          | 1                                          | 0.2354        | 0(0-Inf)               |
| NEOPLASM, MALIGNANT, LYMPH NODE, INTRA-ABDOMINAL, SECOND     | 0                                       | 0          | 30                                         | 9.366         | 0(0-Inf)               |
| NEOPLASM, MALIGNANT, LYMPH NODE, INTRATHORACIC, SECONDARY    | 0                                       | 0          | 2                                          | 1.8979        | 0(0-Inf)               |
| NEOPLASM, MALIGNANT, LYMPH NODE, MEDIASTINAL, NOS            | 0                                       | 0          | 1                                          | 2.4855        | 0(0-Inf)               |
| NEOPLASM, MALIGNANT, LYMPH NODE, MEDIASTINAL, SECONDARY      | 1                                       | 7.5168     | 20                                         | 6.339         | 1.1858(0.1581-8.8961)  |
| NEOPLASM, MALIGNANT, LYMPH NODE, MESENTERIC, SECONDARY       | 0                                       | 0          | 7                                          | 3.8012        | 0(0-Inf)               |
| NEOPLASM, MALIGNANT, LYMPH NODE, NEC                         | 0                                       | 0          | 1                                          | 0.8878        | 0(0-Inf)               |
| NEOPLASM, MALIGNANT, LYMPH NODE, NEC, SECONDARY              | 0                                       | 0          | 20                                         | 6.6624        | 0(0-Inf)               |
| NEOPLASM, MALIGNANT, LYMPH NODE, NECK, NOS                   | 0                                       | 0          | 2                                          | 1.0782        | 0(0-Inf)               |
| NEOPLASM, MALIGNANT, LYMPH NODE, NECK, SECONDARY             | 2                                       | 15.4035    | 30                                         | 9.921         | 1.5526(0.3688-6.5373)  |
| NEOPLASM, MALIGNANT, LYMPH NODE, NOS                         | 0                                       | 0          | 3                                          | 0.9772        | 0(0-Inf)               |
| NEOPLASM, MALIGNANT, LYMPH NODE, NOS, SECONDARY              | 2                                       | 17.0297    | 87                                         | 33.965        | 0.5014(0.1232-2.0413)  |
| NEOPLASM, MALIGNANT, LYMPH NODE, OBTURATOR, SECONDARY        | 0                                       | 0          | 13                                         | 3.767         | 0(0-Inf)               |
| NEOPLASM, MALIGNANT, LYMPH NODE, PARATRACHEAL, NOS           | 0                                       | 0          | 1                                          | 0.8877        | 0(0-Inf)               |
| NEOPLASM, MALIGNANT, LYMPH NODE, PARATRACHEAL, SECONDARY     | 1                                       | 7.6753     | 21                                         | 6.9915        | 1.0978(0.1468-8.2104)  |
| NEOPLASM, MALIGNANT, LYMPH NODE, PELVIC, SECONDARY           | 0                                       | 0          | 35                                         | 11.8774       | 0(0-Inf)               |
| NEOPLASM, MALIGNANT, LYMPH NODE, RETROPERITONEAL, SECOND     | 1                                       | 11.5218    | 13                                         | 7.9438        | 1.4504(0.1884-11.1636) |
| NEOPLASM, MALIGNANT, LYMPH NODE, SUPRACLAVICULAR, NOS        | 0                                       | 0          | 1                                          | 0.3526        | 0(0-Inf)               |

| Description                                                  | No. of Positive Cases with Disease Code | Case Rate* | No. of Positive Controls with Disease Code | Control Rate* | Relative Risk (95%CI) |
|--------------------------------------------------------------|-----------------------------------------|------------|--------------------------------------------|---------------|-----------------------|
| NEOPLASM, MALIGNANT, LYMPH NODE, SUPRACLAVICULAR, SECOND     | 1                                       | 7.3113     | 24                                         | 7.0341        | 1.0394(0.1397-7.7332) |
| NEOPLASM, MALIGNANT, LYMPH NODE, TRACHEOBRONCHIAL, SECOND    | 0                                       | 0          | 5                                          | 2.1773        | 0(0-Inf)              |
| NEOPLASM, MALIGNANT, LYMPH NODE, TRACHEOESOPHAGEAL, SECOND   | 0                                       | 0          | 9                                          | 2.2329        | 0(0-Inf)              |
| NEOPLASM, MALIGNANT, MALAR REGION, PRIMARY                   | 1                                       | 10.0369    | 7                                          | 3.6235        | 2.77(0.3357-22.8588)  |
| NEOPLASM, MALIGNANT, MANDIBLE (BONE), PRIMARY                | 0                                       | 0          | 5                                          | 5.7275        | 0(0-Inf)              |
| NEOPLASM, MALIGNANT, MANDIBLE (BONE), SECONDARY              | 0                                       | 0          | 1                                          | 0.3526        | 0(0-Inf)              |
| NEOPLASM, MALIGNANT, MANDIBLE (SOFT TISSUE), PRIMARY         | 0                                       | 0          | 6                                          | 3.1475        | 0(0-Inf)              |
| NEOPLASM, MALIGNANT, MANDIBLE (SOFT TISSUE), SECONDARY       | 0                                       | 0          | 1                                          | 0.3526        | 0(0-Inf)              |
| NEOPLASM, MALIGNANT, MASTECTOMY SITE, PRIMARY                | 0                                       | 0          | 2                                          | 0.4709        | 0(0-Inf)              |
| NEOPLASM, MALIGNANT, MASTECTOMY SITE, SECONDARY              | 0                                       | 0          | 2                                          | 0.432         | 0(0-Inf)              |
| NEOPLASM, MALIGNANT, MAXILLA, NOS                            | 0                                       | 0          | 1                                          | 2.4858        | 0(0-Inf)              |
| NEOPLASM, MALIGNANT, MAXILLA, SUPERIOR, PRIMARY              | 0                                       | 0          | 1                                          | 0.2354        | 0(0-Inf)              |
| NEOPLASM, MALIGNANT, MEDIASTINUM, PRIMARY                    | 0                                       | 0          | 5                                          | 1.3505        | 0(0-Inf)              |
| NEOPLASM, MALIGNANT, MEDIASTINUM, SECONDARY                  | 1                                       | 7.8466     | 27                                         | 9.1657        | 0.8561(0.1157-6.3335) |
| NEOPLASM, MALIGNANT, MENINGES, CEREBRAL, SECONDARY           | 0                                       | 0          | 3                                          | 1.5106        | 0(0-Inf)              |
| NEOPLASM, MALIGNANT, MESENTERY, PRIMARY                      | 0                                       | 0          | 4                                          | 2.4125        | 0(0-Inf)              |
| NEOPLASM, MALIGNANT, MESENTERY, SECONDARY                    | 0                                       | 0          | 22                                         | 5.6468        | 0(0-Inf)              |
| NEOPLASM, MALIGNANT, MESOCOLON, PRIMARY                      | 0                                       | 0          | 1                                          | 0.2354        | 0(0-Inf)              |
| NEOPLASM, MALIGNANT, METASTATIC, SEE ALSO BY SITE, SECONDARY | 41                                      | 424.9775   | 792                                        | 416.557       | 1.0202(0.7447-1.3977) |
| NEOPLASM, MALIGNANT, MOUTH FLOOR, PRIMARY                    | 0                                       | 0          | 12                                         | 5.4679        | 0(0-Inf)              |
| NEOPLASM, MALIGNANT, MOUTH FLOOR, SECONDARY                  | 0                                       | 0          | 1                                          | 0.8532        | 0(0-Inf)              |
| NEOPLASM, MALIGNANT, MOUTH, NEC, PRIMARY                     | 0                                       | 0          | 3                                          | 2.0478        | 0(0-Inf)              |
| NEOPLASM, MALIGNANT, MOUTH, NOS, PRIMARY                     | 0                                       | 0          | 16                                         | 7.719         | 0(0-Inf)              |
| NEOPLASM, MALIGNANT, MOUTH, ROOF OF, PRIMARY                 | 0                                       | 0          | 1                                          | 1.9072        | 0(0-Inf)              |
| NEOPLASM, MALIGNANT, MYOMETRIUM, PRIMARY                     | 0                                       | 0          | 6                                          | 1.6234        | 0(0-Inf)              |
| NEOPLASM, MALIGNANT, MYOMETRIUM, SECONDARY                   | 1                                       | 13.8038    | 30                                         | 13.7937       | 1.0007(0.1356-7.3859) |
| NEOPLASM, MALIGNANT, NASAL CAVITIES, PRIMARY                 | 0                                       | 0          | 1                                          | 0.2354        | 0(0-Inf)              |
| NEOPLASM, MALIGNANT, NASOPHARYNX, PRIMARY                    | 0                                       | 0          | 3                                          | 1.2107        | 0(0-Inf)              |
| NEOPLASM, MALIGNANT, NECK, SKIN, PRIMARY                     | 15                                      | 136.8564   | 318                                        | 137.6343      | 0.9943(0.5916-1.6712) |
| NEOPLASM, MALIGNANT, NECK, SKIN, SECONDARY                   | 0                                       | 0          | 4                                          | 3.73          | 0(0-Inf)              |
| NEOPLASM, MALIGNANT, NECK, SOFT TISSUE, PRIMARY              | 0                                       | 0          | 21                                         | 7.197         | 0(0-Inf)              |
| NEOPLASM, MALIGNANT, NECK, SOFT TISSUE, SECONDARY            | 1                                       | 7.7735     | 42                                         | 14.0631       | 0.5528(0.0758-4.0299) |
| NEOPLASM, MALIGNANT, NERVE, BRACHIAL PLEXUS, PRIMARY         | 0                                       | 0          | 1                                          | 0.2354        | 0(0-Inf)              |
| NEOPLASM, MALIGNANT, NERVE, BRACHIAL PLEXUS, SECOND          | 0                                       | 0          | 4                                          | 0.8813        | 0(0-Inf)              |
| NEOPLASM, MALIGNANT, NERVE, CRANIAL, SECONDARY               | 0                                       | 0          | 3                                          | 1.5755        | 0(0-Inf)              |
| NEOPLASM, MALIGNANT, NERVE, LARYNGEAL, SECONDARY             | 0                                       | 0          | 1                                          | 0.8528        | 0(0-Inf)              |

| Description                                            | No. of Positive Cases with Disease Code | Case Rate* | No. of Positive Controls with Disease Code | Control Rate* | Relative Risk (95%CI)    |
|--------------------------------------------------------|-----------------------------------------|------------|--------------------------------------------|---------------|--------------------------|
| NEOPLASM, MALIGNANT, NERVE, SCIATIC, SECONDARY         | 0                                       | 0          | 1                                          | 0.234         | 0(0-Inf)                 |
| NEOPLASM, MALIGNANT, NERVOUS SYSTEM, NOS, PRIMARY      | 0                                       | 0          | 2                                          | 1.1613        | 0(0-Inf)                 |
| NEOPLASM, MALIGNANT, NERVOUS SYSTEM, NOS, SECONDARY    | 1                                       | 8.7612     | 15                                         | 6.1292        | 1.4294(0.1873-10.9105)   |
| NEOPLASM, MALIGNANT, NIPPLE, PRIMARY                   | 0                                       | 0          | 2                                          | 0.4709        | 0(0-Inf)                 |
| NEOPLASM, MALIGNANT, NIPPLE, SECONDARY                 | 0                                       | 0          | 2                                          | 0.432         | 0(0-Inf)                 |
| NEOPLASM, MALIGNANT, NOSE, CARTILAGE, PRIMARY          | 0                                       | 0          | 1                                          | 0.4751        | 0(0-Inf)                 |
| NEOPLASM, MALIGNANT, NOSE, INTERNAL, PRIMARY           | 0                                       | 0          | 3                                          | 1.2104        | 0(0-Inf)                 |
| NEOPLASM, MALIGNANT, NOSE, SEPTUM, PRIMARY             | 0                                       | 0          | 2                                          | 0.8097        | 0(0-Inf)                 |
| NEOPLASM, MALIGNANT, NOSE, SKIN, PRIMARY               | 42                                      | 390.1373   | 805                                        | 346.6065      | 1.1256(0.8246-1.5365)    |
| NEOPLASM, MALIGNANT, NOSE, SKIN, SECONDARY             | 0                                       | 0          | 8                                          | 1.9421        | 0(0-Inf)                 |
| NEOPLASM, MALIGNANT, OMENTUM, PRIMARY                  | 1                                       | 7.7769     | 2                                          | 0.6823        | 11.3983(0.9961-130.4275) |
| NEOPLASM, MALIGNANT, OMENTUM, SECONDARY (OMENTAL CAKE) | 3                                       | 20.7775    | 31                                         | 7.5633        | 2.7471(0.8318-9.0723)    |
| NEOPLASM, MALIGNANT, ORBIT, PRIMARY                    | 0                                       | 0          | 3                                          | 2.8228        | 0(0-Inf)                 |
| NEOPLASM, MALIGNANT, ORBIT, SECONDARY                  | 1                                       | 7.6413     | 4                                          | 1.2935        | 5.9073(0.642-54.3563)    |
| NEOPLASM, MALIGNANT, OROPHARYNX, NEC, PRIMARY          | 0                                       | 0          | 2                                          | 0.5475        | 0(0-Inf)                 |
| NEOPLASM, MALIGNANT, OROPHARYNX, NOS, PRIMARY          | 0                                       | 0          | 7                                          | 2.7297        | 0(0-Inf)                 |
| NEOPLASM, MALIGNANT, OROPHARYNX, NOS, SECONDARY        | 0                                       | 0          | 1                                          | 0.4048        | 0(0-Inf)                 |
| NEOPLASM, MALIGNANT, OVARY, PRIMARY                    | 5                                       | 69.3123    | 96                                         | 45.1227       | 1.5361(0.6224-3.7911)    |
| NEOPLASM, MALIGNANT, OVARY, SECONDARY                  | 0                                       | 0          | 8                                          | 1.7679        | 0(0-Inf)                 |
| NEOPLASM, MALIGNANT, PALATE, PRIMARY                   | 0                                       | 0          | 9                                          | 3.1743        | 0(0-Inf)                 |
| NEOPLASM, MALIGNANT, PALATE, SECONDARY                 | 0                                       | 0          | 1                                          | 0.4048        | 0(0-Inf)                 |
| NEOPLASM, MALIGNANT, PANCREAS, BODY, PRIMARY           | 0                                       | 0          | 2                                          | 1.1971        | 0(0-Inf)                 |
| NEOPLASM, MALIGNANT, PANCREAS, HEAD, PRIMARY           | 2                                       | 23.3936    | 11                                         | 6.9628        | 3.3598(0.7367-15.3229)   |
| NEOPLASM, MALIGNANT, PANCREAS, HEAD, SECONDARY         | 0                                       | 0          | 2                                          | 0.7896        | 0(0-Inf)                 |
| NEOPLASM, MALIGNANT, PANCREAS, NEC, PRIMARY            | 0                                       | 0          | 1                                          | 0.398         | 0(0-Inf)                 |
| NEOPLASM, MALIGNANT, PANCREAS, NECK, PRIMARY           | 0                                       | 0          | 1                                          | 0.3526        | 0(0-Inf)                 |
| NEOPLASM, MALIGNANT, PANCREAS, NOS, PRIMARY            | 7                                       | 84.5567    | 83                                         | 54.3149       | 1.5568(0.7178-3.3765)    |
| NEOPLASM, MALIGNANT, PANCREAS, NOS, SECONDARY          | 0                                       | 0          | 4                                          | 1.1417        | 0(0-Inf)                 |
| NEOPLASM, MALIGNANT, PANCREAS, TAIL, PRIMARY           | 0                                       | 0          | 4                                          | 1.9294        | 0(0-Inf)                 |
| NEOPLASM, MALIGNANT, PANCREAS, TAIL, SECONDARY         | 0                                       | 0          | 1                                          | 0.4049        | 0(0-Inf)                 |
| NEOPLASM, MALIGNANT, PARATHYROID, SECONDARY            | 0                                       | 0          | 1                                          | 0.398         | 0(0-Inf)                 |
| NEOPLASM, MALIGNANT, PAROTID, PRIMARY                  | 0                                       | 0          | 17                                         | 4.6878        | 0(0-Inf)                 |
| NEOPLASM, MALIGNANT, PAROTID, SECONDARY                | 0                                       | 0          | 7                                          | 4.3341        | 0(0-Inf)                 |
| NEOPLASM, MALIGNANT, PELVIC, ADNEXA, PRIMARY           | 0                                       | 0          | 2                                          | 0.4708        | 0(0-Inf)                 |
| NEOPLASM, MALIGNANT, PELVIC, ADNEXA, SECONDARY         | 1                                       | 7.2721     | 2                                          | 0.5819        | 12.4981(1.0759-145.1855) |
| NEOPLASM, MALIGNANT, PELVIC, PRIMARY                   | 0                                       | 0          | 10                                         | 4.7163        | 0(0-Inf)                 |
| NEOPLASM, MALIGNANT, PELVIC, SECONDARY                 | 4                                       | 29.6153    | 60                                         | 18.1835       | 1.6287(0.589-4.5034)     |
| NEOPLASM, MALIGNANT, PENIS, PRIMARY                    | 1                                       | 16.549     | 11                                         | 8.5943        | 1.9256(0.2467-15.0311)   |



| Description                                                                   | No. of Positive Cases with Disease Code | Case Rate* | No. of Positive Controls with Disease Code | Control Rate* | Relative Risk (95%CI)    |
|-------------------------------------------------------------------------------|-----------------------------------------|------------|--------------------------------------------|---------------|--------------------------|
| NEOPLASM, MALIGNANT, PERIAMPULLARY, UNSPECIFIED PRIMARY OR SECONDARY          | 0                                       | 0          | 3                                          | 1.2144        | 0(0-Inf)                 |
| NEOPLASM, MALIGNANT, PERICARDIUM, PRIMARY                                     | 0                                       | 0          | 1                                          | 0.2354        | 0(0-Inf)                 |
| NEOPLASM, MALIGNANT, PERICARDIUM, SECONDARY                                   | 0                                       | 0          | 5                                          | 1.3907        | 0(0-Inf)                 |
| NEOPLASM, MALIGNANT, PERINEUM, PRIMARY                                        | 1                                       | 10.8804    | 2                                          | 0.4974        | 21.8752(1.9013-251.6771) |
| NEOPLASM, MALIGNANT, PERINEUM, SKIN, PRIMARY                                  | 0                                       | 0          | 2                                          | 0.432         | 0(0-Inf)                 |
| NEOPLASM, MALIGNANT, PERINEUM, SKIN, SECONDARY                                | 0                                       | 0          | 1                                          | 0.2354        | 0(0-Inf)                 |
| NEOPLASM, MALIGNANT, PERITONEUM, PRIMARY                                      | 0                                       | 0          | 8                                          | 2.2046        | 0(0-Inf)                 |
| NEOPLASM, MALIGNANT, PERITONEUM, SECONDARY                                    | 1                                       | 7.6223     | 40                                         | 12.8016       | 0.5954(0.0815-4.3486)    |
| NEOPLASM, MALIGNANT, PHARYNX, NOS, PRIMARY                                    | 0                                       | 0          | 8                                          | 2.4025        | 0(0-Inf)                 |
| NEOPLASM, MALIGNANT, PINEAL, SECONDARY                                        | 0                                       | 0          | 1                                          | 0.2354        | 0(0-Inf)                 |
| NEOPLASM, MALIGNANT, PINNA, SKIN, PRIMARY                                     | 1                                       | 13.6339    | 22                                         | 16.8754       | 0.8079(0.1085-6.0144)    |
| NEOPLASM, MALIGNANT, PLEURA, PRIMARY                                          | 0                                       | 0          | 12                                         | 5.623         | 0(0-Inf)                 |
| NEOPLASM, MALIGNANT, PLEURA, SECONDARY                                        | 4                                       | 32.5944    | 77                                         | 27.9165       | 1.1676(0.4258-3.2013)    |
| NEOPLASM, MALIGNANT, POPLITEAL SPACE, SKIN, PRIMARY                           | 0                                       | 0          | 1                                          | 0.8879        | 0(0-Inf)                 |
| NEOPLASM, MALIGNANT, POSTAURICULAR, PRIMARY                                   | 4                                       | 44.02      | 119                                        | 68.7811       | 0.64(0.236-1.7359)       |
| NEOPLASM, MALIGNANT, POSTAURICULAR, SECONDARY                                 | 0                                       | 0          | 5                                          | 2.5947        | 0(0-Inf)                 |
| NEOPLASM, MALIGNANT, PREAURICULAR, PRIMARY                                    | 6                                       | 68.7312    | 155                                        | 93.9826       | 0.7313(0.3231-1.6554)    |
| NEOPLASM, MALIGNANT, PRIMARY NOT STATED                                       | 0                                       | 0          | 11                                         | 4.7462        | 0(0-Inf)                 |
| NEOPLASM, MALIGNANT, PRIMARY UNKNOWN (NOS)                                    | 3                                       | 31.4693    | 56                                         | 30.1601       | 1.0434(0.3255-3.3446)    |
| NEOPLASM, MALIGNANT, PRIMARY, NEC                                             | 0                                       | 0          | 3                                          | 1.2148        | 0(0-Inf)                 |
| NEOPLASM, MALIGNANT, PROSTATE, PRIMARY--NMPR                                  | 52                                      | 614.1118   | 1028                                       | 624.6097      | 0.9832(0.7437-1.2999)    |
| NEOPLASM, MALIGNANT, PROSTATE, SECONDARY                                      | 0                                       | 0          | 6                                          | 3.8136        | 0(0-Inf)                 |
| NEOPLASM, MALIGNANT, PROSTATIC BED, PRIMARY (FOLLOWING RADICAL PROSTATECTOMY) | 0                                       | 0          | 19                                         | 22.1535       | 0(0-Inf)                 |
| NEOPLASM, MALIGNANT, PUBES, SKIN, PRIMARY                                     | 0                                       | 0          | 3                                          | 0.6986        | 0(0-Inf)                 |
| NEOPLASM, MALIGNANT, PUBIC BONE, SECONDARY                                    | 0                                       | 0          | 4                                          | 1.3628        | 0(0-Inf)                 |
| NEOPLASM, MALIGNANT, PYLORUS, SECONDARY                                       | 0                                       | 0          | 1                                          | 0.4048        | 0(0-Inf)                 |
| NEOPLASM, MALIGNANT, PYRIFORM FOSSA/SINUS, PRIMARY                            | 0                                       | 0          | 3                                          | 0.6985        | 0(0-Inf)                 |
| NEOPLASM, MALIGNANT, RECTOSIGMOID, PRIMARY                                    | 2                                       | 15.3992    | 25                                         | 8.3971        | 1.8339(0.4315-7.7933)    |
| NEOPLASM, MALIGNANT, RECTOSIGMOID, SECONDARY                                  | 0                                       | 0          | 2                                          | 0.4853        | 0(0-Inf)                 |
| NEOPLASM, MALIGNANT, RECTUM, PRIMARY                                          | 4                                       | 37.4045    | 117                                        | 53.3258       | 0.7014(0.2584-1.9039)    |
| NEOPLASM, MALIGNANT, RECTUM, SECONDARY                                        | 0                                       | 0          | 3                                          | 2.6631        | 0(0-Inf)                 |
| NEOPLASM, MALIGNANT, RESPIRATORY, NOS, PRIMARY                                | 0                                       | 0          | 1                                          | 0.234         | 0(0-Inf)                 |
| NEOPLASM, MALIGNANT, RESPIRATORY, NOS, SECONDARY                              | 0                                       | 0          | 1                                          | 0.234         | 0(0-Inf)                 |
| NEOPLASM, MALIGNANT, RETROMOLAR, PRIMARY                                      | 0                                       | 0          | 5                                          | 1.9393        | 0(0-Inf)                 |
| NEOPLASM, MALIGNANT, RETROPERITONEUM, PRIMARY                                 | 0                                       | 0          | 4                                          | 1.9299        | 0(0-Inf)                 |
| NEOPLASM, MALIGNANT, RETROPERITONEUM, SECOND                                  | 0                                       | 0          | 16                                         | 5.6537        | 0(0-Inf)                 |
| NEOPLASM, MALIGNANT, RIBS, SECONDARY                                          | 1                                       | 7.4641     | 17                                         | 5.2767        | 1.4145(0.1867-10.7179)   |
| NEOPLASM, MALIGNANT, SACRUM, PRIMARY                                          | 0                                       | 0          | 1                                          | 0.8272        | 0(0-Inf)                 |

| Description                                                    | No. of Positive Cases with Disease Code | Case Rate* | No. of Positive Controls with Disease Code | Control Rate* | Relative Risk (95%CI)   |
|----------------------------------------------------------------|-----------------------------------------|------------|--------------------------------------------|---------------|-------------------------|
| NEOPLASM, MALIGNANT, SACRUM, SECONDARY                         | 0                                       | 0          | 7                                          | 7.6136        | 0(0-Inf)                |
| NEOPLASM, MALIGNANT, SALIVARY GLAND, NOS, PRIMARY              | 0                                       | 0          | 4                                          | 1.1114        | 0(0-Inf)                |
| NEOPLASM, MALIGNANT, SALIVARY GLAND, NOS, SECONDARY            | 1                                       | 11.6652    | 0                                          | 0             | 8824967652.4331(0-Inf)  |
| NEOPLASM, MALIGNANT, SALIVARY GLAND, SUBLINGUAL, PRIM          | 0                                       | 0          | 1                                          | 0.2354        | 0(0-Inf)                |
| NEOPLASM, MALIGNANT, SCALP, SKIN, PRIMARY                      | 15                                      | 185.4312   | 190                                        | 124.9979      | 1.4835(0.8756-2.5134)   |
| NEOPLASM, MALIGNANT, SCALP, SKIN, SECONDARY                    | 0                                       | 0          | 3                                          | 0.8018        | 0(0-Inf)                |
| NEOPLASM, MALIGNANT, SCAPULA (BONE), PRIMARY                   | 0                                       | 0          | 1                                          | 0.3526        | 0(0-Inf)                |
| NEOPLASM, MALIGNANT, SCAPULA (BONE), SECONDARY                 | 0                                       | 0          | 2                                          | 0.4853        | 0(0-Inf)                |
| NEOPLASM, MALIGNANT, SCROTUM, SKIN, PRIMARY                    | 0                                       | 0          | 1                                          | 2.4856        | 0(0-Inf)                |
| NEOPLASM, MALIGNANT, SECONDARY SITE NOT STATED--NMS            | 7                                       | 58.2843    | 181                                        | 68.3096       | 0.8532(0.4003-1.8187)   |
| NEOPLASM, MALIGNANT, SECONDARY, NEC                            | 0                                       | 0          | 2                                          | 0.5709        | 0(0-Inf)                |
| NEOPLASM, MALIGNANT, SEMINAL VESICLE, PRIMARY                  | 0                                       | 0          | 1                                          | 0.8878        | 0(0-Inf)                |
| NEOPLASM, MALIGNANT, SEMINAL VESICLE, SECONDARY                | 6                                       | 98.9703    | 46                                         | 34.9657       | 2.8305(1.204-6.6543)    |
| NEOPLASM, MALIGNANT, SHOULDER, SKIN, PRIMARY                   | 15                                      | 113.1374   | 230                                        | 73.0223       | 1.5494(0.9171-2.6174)   |
| NEOPLASM, MALIGNANT, SHOULDER, SKIN, SECONDARY                 | 0                                       | 0          | 2                                          | 0.4709        | 0(0-Inf)                |
| NEOPLASM, MALIGNANT, SHOULDER, SOFT TISSUE, PRIMARY            | 0                                       | 0          | 6                                          | 2.1165        | 0(0-Inf)                |
| NEOPLASM, MALIGNANT, SHOULDER, SOFT TISSUE, SECONDARY          | 0                                       | 0          | 3                                          | 1.3866        | 0(0-Inf)                |
| NEOPLASM, MALIGNANT, SINUS, MAXILLARY, PRIMARY                 | 0                                       | 0          | 2                                          | 0.7896        | 0(0-Inf)                |
| NEOPLASM, MALIGNANT, SINUS, NEC, PRIMARY                       | 0                                       | 0          | 1                                          | 0.4048        | 0(0-Inf)                |
| NEOPLASM, MALIGNANT, SINUS, NEC, SECONDARY                     | 0                                       | 0          | 1                                          | 0.4048        | 0(0-Inf)                |
| NEOPLASM, MALIGNANT, SKIN, NOS, PRIMARY, CODE SITE IF STATED   | 75                                      | 855.3964   | 1561                                       | 892.7631      | 0.9581(0.7596-1.2086)   |
| NEOPLASM, MALIGNANT, SKIN, NOS, SECONDARY, CODE SITE IF STATED | 3                                       | 24.0795    | 19                                         | 6.6855        | 3.6018(1.0535-12.3144)  |
| NEOPLASM, MALIGNANT, SKULL, BONE, PRIMARY                      | 0                                       | 0          | 3                                          | 2.8228        | 0(0-Inf)                |
| NEOPLASM, MALIGNANT, SKULL, BONE, SECONDARY                    | 0                                       | 0          | 5                                          | 2.0025        | 0(0-Inf)                |
| NEOPLASM, MALIGNANT, SOFT TISSUE, NOS, PRIMARY                 | 0                                       | 0          | 2                                          | 0.5908        | 0(0-Inf)                |
| NEOPLASM, MALIGNANT, SOFT TISSUE, NOS, SECONDARY               | 0                                       | 0          | 19                                         | 10.0256       | 0(0-Inf)                |
| NEOPLASM, MALIGNANT, SPERMATIC CORD, SECONDARY                 | 0                                       | 0          | 1                                          | 0.2729        | 0(0-Inf)                |
| NEOPLASM, MALIGNANT, SPINAL COLUMN, NOS, SECONDARY             | 4                                       | 35.2767    | 31                                         | 12.7979       | 2.7565(0.9662-7.8637)   |
| NEOPLASM, MALIGNANT, SPINAL CORD, PRIMARY                      | 1                                       | 8.483      | 2                                          | 0.5672        | 14.9565(1.317-169.8513) |
| NEOPLASM, MALIGNANT, SPINAL CORD, SECONDARY                    | 0                                       | 0          | 11                                         | 4.6259        | 0(0-Inf)                |
| NEOPLASM, MALIGNANT, SPLEEN, NOS, PRIMARY                      | 0                                       | 0          | 2                                          | 0.8097        | 0(0-Inf)                |
| NEOPLASM, MALIGNANT, SPLEEN, SECONDARY                         | 0                                       | 0          | 9                                          | 3.1303        | 0(0-Inf)                |
| NEOPLASM, MALIGNANT, SPUTUM CELLS, PRIMARY                     | 0                                       | 0          | 3                                          | 1.3867        | 0(0-Inf)                |
| NEOPLASM, MALIGNANT, SQUAMOCOLUMNAR JUNCTION, IN SITU, PRIM    | 0                                       | 0          | 1                                          | 0.827         | 0(0-Inf)                |
| NEOPLASM, MALIGNANT, STERNUM, PRIMARY                          | 0                                       | 0          | 1                                          | 0.2729        | 0(0-Inf)                |
| NEOPLASM, MALIGNANT, STERNUM, SECONDARY                        | 0                                       | 0          | 2                                          | 0.4853        | 0(0-Inf)                |
| NEOPLASM, MALIGNANT, STOMACH, CURVATURE, PRIMARY               | 0                                       | 0          | 4                                          | 1.2654        | 0(0-Inf)                |

| Description                                                    | No. of Positive Cases with Disease Code | Case Rate* | No. of Positive Controls with Disease Code | Control Rate* | Relative Risk (95%CI)  |
|----------------------------------------------------------------|-----------------------------------------|------------|--------------------------------------------|---------------|------------------------|
| NEOPLASM, MALIGNANT, STOMACH, CURVATURE, SECONDARY             | 0                                       | 0          | 1                                          | 0.4048        | 0(0-Inf)               |
| NEOPLASM, MALIGNANT, STOMACH, FUNDUS, SECONDARY                | 0                                       | 0          | 1                                          | 0.8877        | 0(0-Inf)               |
| NEOPLASM, MALIGNANT, STOMACH, NEC, PRIMARY                     | 0                                       | 0          | 14                                         | 7.3231        | 0(0-Inf)               |
| NEOPLASM, MALIGNANT, STOMACH, NOS, PRIMARY                     | 2                                       | 24.1196    | 40                                         | 26.1705       | 0.9216(0.222-3.8259)   |
| NEOPLASM, MALIGNANT, STOMACH, NOS, SECONDARY                   | 0                                       | 0          | 5                                          | 1.3907        | 0(0-Inf)               |
| NEOPLASM, MALIGNANT, SUBGLOTTIC, PRIMARY                       | 0                                       | 0          | 6                                          | 2.2096        | 0(0-Inf)               |
| NEOPLASM, MALIGNANT, SUBMANDIBULAR GLAND, PRIMARY              | 0                                       | 0          | 2                                          | 1.1613        | 0(0-Inf)               |
| NEOPLASM, MALIGNANT, SUBMANDIBULAR GLAND, SECONDARY            | 0                                       | 0          | 2                                          | 0.5708        | 0(0-Inf)               |
| NEOPLASM, MALIGNANT, SUBMENTAL REGION (SOFT TISSUE), SECONDARY | 0                                       | 0          | 1                                          | 0.3526        | 0(0-Inf)               |
| NEOPLASM, MALIGNANT, SWEAT GLAND, PRIMARY                      | 0                                       | 0          | 2                                          | 1.0782        | 0(0-Inf)               |
| NEOPLASM, MALIGNANT, TEMPLE (SKIN), PRIMARY                    | 19                                      | 227.6153   | 299                                        | 189.7048      | 1.1998(0.7537-1.91)    |
| NEOPLASM, MALIGNANT, TEMPLE (SKIN), SECONDARY                  | 0                                       | 0          | 1                                          | 0.2354        | 0(0-Inf)               |
| NEOPLASM, MALIGNANT, TEMPORAL BONE, PRIMARY                    | 0                                       | 0          | 1                                          | 0.2729        | 0(0-Inf)               |
| NEOPLASM, MALIGNANT, TESTIS, PRIMARY                           | 1                                       | 6.9437     | 6                                          | 1.7344        | 4.0036(0.4752-33.7311) |
| NEOPLASM, MALIGNANT, THIGH, SKIN, PRIMARY                      | 5                                       | 34.9507    | 63                                         | 16.137        | 2.1659(0.8662-5.4154)  |
| NEOPLASM, MALIGNANT, THIGH, SOFT TISSUE, PRIMARY               | 0                                       | 0          | 5                                          | 1.5553        | 0(0-Inf)               |
| NEOPLASM, MALIGNANT, THIGH, SOFT TISSUE, SECONDARY             | 0                                       | 0          | 1                                          | 0.2729        | 0(0-Inf)               |
| NEOPLASM, MALIGNANT, THORACIC ORGANS, PRIMARY                  | 0                                       | 0          | 1                                          | 0.234         | 0(0-Inf)               |
| NEOPLASM, MALIGNANT, THORACIC ORGANS, SECONDARY                | 1                                       | 11.6642    | 0                                          | 0             | 8824264259.8254(0-Inf) |
| NEOPLASM, MALIGNANT, THORAX, PRIMARY                           | 0                                       | 0          | 3                                          | 0.8017        | 0(0-Inf)               |
| NEOPLASM, MALIGNANT, THORAX, SECONDARY                         | 0                                       | 0          | 1                                          | 0.398         | 0(0-Inf)               |
| NEOPLASM, MALIGNANT, THROAT, PRIMARY                           | 0                                       | 0          | 3                                          | 1.3867        | 0(0-Inf)               |
| NEOPLASM, MALIGNANT, THYROID BED (FOLLOWING THYROIDECTOMY)     | 0                                       | 0          | 2                                          | 1.8979        | 0(0-Inf)               |
| NEOPLASM, MALIGNANT, THYROID, PRIMARY                          | 1                                       | 6.9604     | 54                                         | 13.0772       | 0.5323(0.0734-3.8599)  |
| NEOPLASM, MALIGNANT, THYROID, SECONDARY                        | 0                                       | 0          | 1                                          | 0.3526        | 0(0-Inf)               |
| NEOPLASM, MALIGNANT, TIBIA, PRIMARY                            | 0                                       | 0          | 2                                          | 0.4854        | 0(0-Inf)               |
| NEOPLASM, MALIGNANT, TIBIA, SECONDARY                          | 0                                       | 0          | 2                                          | 0.7896        | 0(0-Inf)               |
| NEOPLASM, MALIGNANT, TONGUE BASE, PRIMARY                      | 0                                       | 0          | 11                                         | 3.7777        | 0(0-Inf)               |
| NEOPLASM, MALIGNANT, TONGUE BASE, SECONDARY                    | 0                                       | 0          | 2                                          | 0.6774        | 0(0-Inf)               |
| NEOPLASM, MALIGNANT, TONGUE BORDER, PRIMARY                    | 0                                       | 0          | 1                                          | 0.4048        | 0(0-Inf)               |
| NEOPLASM, MALIGNANT, TONGUE VENTRAL, PRIMARY                   | 0                                       | 0          | 1                                          | 0.3526        | 0(0-Inf)               |
| NEOPLASM, MALIGNANT, TONGUE, NOS, PRIMARY                      | 2                                       | 20.4194    | 23                                         | 11.8616       | 1.7215(0.4033-7.3477)  |
| NEOPLASM, MALIGNANT, TONSIL, PRIMARY                           | 1                                       | 7.9202     | 15                                         | 5.2314        | 1.514(0.1983-11.5576)  |
| NEOPLASM, MALIGNANT, TRACHEA, PRIMARY                          | 0                                       | 0          | 8                                          | 2.644         | 0(0-Inf)               |
| NEOPLASM, MALIGNANT, TRACHEA, SECONDARY                        | 0                                       | 0          | 4                                          | 2.3945        | 0(0-Inf)               |
| NEOPLASM, MALIGNANT, TRUNK, SKIN, PRIMARY                      | 3                                       | 27.4511    | 37                                         | 16.2621       | 1.688(0.5179-5.5017)   |
| NEOPLASM, MALIGNANT, TRUNK, SKIN, SECONDARY                    | 0                                       | 0          | 1                                          | 0.3526        | 0(0-Inf)               |
| NEOPLASM, MALIGNANT, TRUNK, SOFT TISSUE, PRIMARY               | 0                                       | 0          | 2                                          | 0.5909        | 0(0-Inf)               |

| Description                                                | No. of Positive Cases with Disease Code | Case Rate* | No. of Positive Controls with Disease Code | Control Rate* | Relative Risk (95%CI)    |
|------------------------------------------------------------|-----------------------------------------|------------|--------------------------------------------|---------------|--------------------------|
| NEOPLASM, MALIGNANT, TRUNK, SOFT TISSUE, SECONDARY         | 0                                       | 0          | 4                                          | 0.9519        | 0(0-Inf)                 |
| NEOPLASM, MALIGNANT, UMBILICUS, SKIN, SECONDARY            | 0                                       | 0          | 2                                          | 0.8096        | 0(0-Inf)                 |
| NEOPLASM, MALIGNANT, UPPER EXTREMITY, SKIN, PRIMARY        | 2                                       | 22.5486    | 48                                         | 28.4535       | 0.7925(0.1921-3.2697)    |
| NEOPLASM, MALIGNANT, UPPER EXTREMITY, SOFT TISSUE, PRIMARY | 0                                       | 0          | 3                                          | 1.5108        | 0(0-Inf)                 |
| NEOPLASM, MALIGNANT, URACHUS, PRIMARY                      | 0                                       | 0          | 1                                          | 0.2729        | 0(0-Inf)                 |
| NEOPLASM, MALIGNANT, URETER, PRIMARY                       | 1                                       | 10.105     | 22                                         | 11.1684       | 0.9048(0.1214-6.7445)    |
| NEOPLASM, MALIGNANT, URETER, SECONDARY                     | 0                                       | 0          | 8                                          | 4.3484        | 0(0-Inf)                 |
| NEOPLASM, MALIGNANT, URETEROPELVIC JUNCTION, PRIMARY       | 0                                       | 0          | 2                                          | 0.4708        | 0(0-Inf)                 |
| NEOPLASM, MALIGNANT, URETHRA, PRIMARY                      | 0                                       | 0          | 11                                         | 5.838         | 0(0-Inf)                 |
| NEOPLASM, MALIGNANT, URETHRA, SECONDARY                    | 0                                       | 0          | 13                                         | 6.0239        | 0(0-Inf)                 |
| NEOPLASM, MALIGNANT, URETHROVESICAL ANASTOMOTIC SITE       | 0                                       | 0          | 3                                          | 1.3869        | 0(0-Inf)                 |
| NEOPLASM, MALIGNANT, URINARY TRACT, NOS, PRIMARY           | 1                                       | 12.305     | 10                                         | 6.6824        | 1.8414(0.234-14.4885)    |
| NEOPLASM, MALIGNANT, UTERINE LIGAMENT, PRIMARY             | 0                                       | 0          | 1                                          | 0.234         | 0(0-Inf)                 |
| NEOPLASM, MALIGNANT, UTERINE LIGAMENT, SECONDARY           | 1                                       | 7.1239     | 1                                          | 0.2189        | 32.5371(1.8952-558.5964) |
| NEOPLASM, MALIGNANT, UTERUS, NOS, PRIMARY                  | 1                                       | 14.0413    | 43                                         | 22.7245       | 0.6179(0.0847-4.5067)    |
| NEOPLASM, MALIGNANT, UTERUS, NOS, SECONDARY                | 1                                       | 14.217     | 14                                         | 6.1358        | 2.317(0.3007-17.8564)    |
| NEOPLASM, MALIGNANT, VAGINA, PRIMARY                       | 1                                       | 13.8056    | 14                                         | 6.5114        | 2.1202(0.2752-16.3352)   |
| NEOPLASM, MALIGNANT, VAGINA, SECONDARY                     | 1                                       | 15.0068    | 10                                         | 6.2089        | 2.417(0.3047-19.1751)    |
| NEOPLASM, MALIGNANT, VASCULAR, NOS, PRIMARY                | 0                                       | 0          | 2                                          | 1.8999        | 0(0-Inf)                 |
| NEOPLASM, MALIGNANT, VASCULAR, SECONDARY                   | 0                                       | 0          | 1                                          | 0.8877        | 0(0-Inf)                 |
| NEOPLASM, MALIGNANT, VASCULAR, TRUNK, PRIMARY              | 0                                       | 0          | 2                                          | 0.8096        | 0(0-Inf)                 |
| NEOPLASM, MALIGNANT, VEIN, SECONDARY                       | 1                                       | 8.5297     | 7                                          | 2.7775        | 3.071(0.3727-25.3031)    |
| NEOPLASM, MALIGNANT, VENA CAVA, PRIMARY                    | 0                                       | 0          | 1                                          | 0.3526        | 0(0-Inf)                 |
| NEOPLASM, MALIGNANT, VERTEBRA, SACRAL, SECONDARY           | 0                                       | 0          | 1                                          | 0.2354        | 0(0-Inf)                 |
| NEOPLASM, MALIGNANT, VERTEBRAE, NOS, SECONDARY             | 1                                       | 11.3626    | 22                                         | 13.2562       | 0.8572(0.115-6.3879)     |
| NEOPLASM, MALIGNANT, VESICAL ORIFICE, PRIMARY              | 0                                       | 0          | 3                                          | 1.9026        | 0(0-Inf)                 |
| NEOPLASM, MALIGNANT, VESICAL ORIFICE, SECONDARY            | 0                                       | 0          | 4                                          | 1.4108        | 0(0-Inf)                 |
| NEOPLASM, MALIGNANT, VOCAL CORD, FALSE, PRIMARY            | 0                                       | 0          | 5                                          | 2.2758        | 0(0-Inf)                 |
| NEOPLASM, MALIGNANT, VOCAL CORD, FALSE, SECONDARY          | 0                                       | 0          | 1                                          | 0.4751        | 0(0-Inf)                 |
| NEOPLASM, MALIGNANT, VOCAL CORD, PRIMARY                   | 1                                       | 9.7322     | 22                                         | 10.7549       | 0.9049(0.1215-6.7404)    |
| NEOPLASM, MALIGNANT, VON BRUNN'S NEST, PRIMARY             | 0                                       | 0          | 1                                          | 0.4049        | 0(0-Inf)                 |
| NEOPLASM, MALIGNANT, VULVA, PRIMARY                        | 0                                       | 0          | 22                                         | 14.9104       | 0(0-Inf)                 |
| NEOPLASM, MALIGNANT, VULVA, SECONDARY                      | 0                                       | 0          | 1                                          | 0.4048        | 0(0-Inf)                 |
| NEOPLASM, NEC                                              | 0                                       | 0          | 1                                          | 0.4048        | 0(0-Inf)                 |
| NEOPLASM, NOS                                              | 0                                       | 0          | 13                                         | 5.6828        | 0(0-Inf)                 |
| NEOPLASM, NOS, ABDOMEN, NOS                                | 1                                       | 6.9494     | 1                                          | 0.2537        | 27.3878(1.5946-470.3837) |
| NEOPLASM, NOS, ADRENAL GLAND                               | 0                                       | 0          | 4                                          | 1.1417        | 0(0-Inf)                 |
| NEOPLASM, NOS, ALVEOLUS                                    | 0                                       | 0          | 1                                          | 0.4048        | 0(0-Inf)                 |
| NEOPLASM, NOS, AMPULLA OF VATER                            | 0                                       | 0          | 2                                          | 1.1974        | 0(0-Inf)                 |

| Description                                          | No. of Positive Cases with Disease Code |            | No. of Positive Controls with Disease Code |               | Relative Risk (95%CI)    |
|------------------------------------------------------|-----------------------------------------|------------|--------------------------------------------|---------------|--------------------------|
|                                                      |                                         | Case Rate* |                                            | Control Rate* |                          |
| NEOPLASM, NOS, BILE DUCT                             | 0                                       | 0          | 2                                          | 0.8096        | 0(0-Inf)                 |
| NEOPLASM, NOS, BLADDER                               | 3                                       | 35.9214    | 35                                         | 22.5185       | 1.5952(0.4887-5.207)     |
| NEOPLASM, NOS, BLOOD VESSEL                          | 0                                       | 0          | 1                                          | 0.3526        | 0(0-Inf)                 |
| NEOPLASM, NOS, BONE, HEAD OR NECK                    | 0                                       | 0          | 4                                          | 1.1418        | 0(0-Inf)                 |
| NEOPLASM, NOS, BONE, TRUNK                           | 0                                       | 0          | 2                                          | 0.5709        | 0(0-Inf)                 |
| NEOPLASM, NOS, BONE, UPPER EXTREMITY                 | 0                                       | 0          | 1                                          | 0.4048        | 0(0-Inf)                 |
| NEOPLASM, NOS, BOWEL, SMALL                          | 0                                       | 0          | 1                                          | 0.2354        | 0(0-Inf)                 |
| NEOPLASM, NOS, BRAIN                                 | 1                                       | 7.871      | 53                                         | 18.192        | 0.4327(0.0597-3.1368)    |
| NEOPLASM, NOS, BREAST                                | 0                                       | 0          | 1                                          | 0.398         | 0(0-Inf)                 |
| NEOPLASM, NOS, BRONCHUS                              | 0                                       | 0          | 6                                          | 1.9483        | 0(0-Inf)                 |
| NEOPLASM, NOS, BUCCAL CAVITY                         | 0                                       | 0          | 1                                          | 0.8878        | 0(0-Inf)                 |
| NEOPLASM, NOS, CARDIA                                | 0                                       | 0          | 2                                          | 0.7896        | 0(0-Inf)                 |
| NEOPLASM, NOS, CAROTID BODY                          | 0                                       | 0          | 2                                          | 0.8097        | 0(0-Inf)                 |
| NEOPLASM, NOS, CECUM                                 | 1                                       | 11.1263    | 4                                          | 2.3268        | 4.7818(0.5254-43.5222)   |
| NEOPLASM, NOS, COLON                                 | 2                                       | 29.8471    | 9                                          | 8.0637        | 3.7014(0.7921-17.2969)   |
| NEOPLASM, NOS, CONNECTIVE TISSUE, CODE SITE IF GIVEN | 0                                       | 0          | 1                                          | 0.2729        | 0(0-Inf)                 |
| NEOPLASM, NOS, DUODENUM                              | 1                                       | 8.8128     | 6                                          | 2.4834        | 3.5486(0.42-29.9799)     |
| NEOPLASM, NOS, ESOPHAGUS                             | 1                                       | 20.8025    | 4                                          | 5.3527        | 3.8864(0.4305-35.0865)   |
| NEOPLASM, NOS, EYE                                   | 1                                       | 7.4025     | 8                                          | 2.4399        | 3.034(0.3733-24.6568)    |
| NEOPLASM, NOS, EYELID                                | 0                                       | 0          | 21                                         | 9.4981        | 0(0-Inf)                 |
| NEOPLASM, NOS, FUNDUS                                | 0                                       | 0          | 1                                          | 0.8535        | 0(0-Inf)                 |
| NEOPLASM, NOS, GASTROINTESTINAL TRACT                | 0                                       | 0          | 2                                          | 0.7896        | 0(0-Inf)                 |
| NEOPLASM, NOS, GENITAL, FEMALE, NEC                  | 0                                       | 0          | 1                                          | 0.8528        | 0(0-Inf)                 |
| NEOPLASM, NOS, GUM                                   | 0                                       | 0          | 2                                          | 1.1976        | 0(0-Inf)                 |
| NEOPLASM, NOS, HEAD, SKIN                            | 3                                       | 33.4263    | 76                                         | 44.3749       | 0.7533(0.2371-2.3931)    |
| NEOPLASM, NOS, HEAD, SOFT TISSUE                     | 1                                       | 7.0671     | 6                                          | 1.6179        | 4.368(0.5137-37.1387)    |
| NEOPLASM, NOS, HURTHLE CELL                          | 0                                       | 0          | 8                                          | 2.205         | 0(0-Inf)                 |
| NEOPLASM, NOS, INTESTINE, LARGE                      | 0                                       | 0          | 1                                          | 0.3526        | 0(0-Inf)                 |
| NEOPLASM, NOS, KIDNEY                                | 1                                       | 11.3654    | 8                                          | 4.8057        | 2.365(0.2926-19.1179)    |
| NEOPLASM, NOS, KIDNEY PELVIS                         | 0                                       | 0          | 1                                          | 0.2354        | 0(0-Inf)                 |
| NEOPLASM, NOS, LARYNX                                | 0                                       | 0          | 2                                          | 1.0782        | 0(0-Inf)                 |
| NEOPLASM, NOS, LIP                                   | 0                                       | 0          | 9                                          | 3.5851        | 0(0-Inf)                 |
| NEOPLASM, NOS, LIVER                                 | 1                                       | 20.8892    | 1                                          | 1.3129        | 15.9107(0.9767-259.1806) |
| NEOPLASM, NOS, LOWER EXTREMITY, SKIN                 | 0                                       | 0          | 9                                          | 3.9543        | 0(0-Inf)                 |
| NEOPLASM, NOS, LOWER EXTREMITY, SOFT TISSUE          | 0                                       | 0          | 3                                          | 0.7884        | 0(0-Inf)                 |
| NEOPLASM, NOS, LUNG                                  | 0                                       | 0          | 3                                          | 2.8227        | 0(0-Inf)                 |
| NEOPLASM, NOS, MAXILLARY SINUS                       | 0                                       | 0          | 2                                          | 0.7896        | 0(0-Inf)                 |
| NEOPLASM, NOS, NECK, SKIN                            | 0                                       | 0          | 6                                          | 3.5084        | 0(0-Inf)                 |
| NEOPLASM, NOS, NECK, SOFT TISSUE                     | 0                                       | 0          | 2                                          | 0.7897        | 0(0-Inf)                 |
| NEOPLASM, NOS, NERVE, PERIPHERAL                     | 0                                       | 0          | 1                                          | 0.3526        | 0(0-Inf)                 |

| Description                                                  | No. of Positive Cases with Disease Code | Case Rate* | No. of Positive Controls with Disease Code | Control Rate* | Relative Risk (95%CI)  |
|--------------------------------------------------------------|-----------------------------------------|------------|--------------------------------------------|---------------|------------------------|
| NEOPLASM, NOS, NERVOUS SYSTEM                                | 0                                       | 0          | 4                                          | 2.4151        | 0(0-Inf)               |
| NEOPLASM, NOS, NOSE                                          | 1                                       | 14.0824    | 7                                          | 5.622         | 2.5049(0.3052-20.5599) |
| NEOPLASM, NOS, OVARY                                         | 0                                       | 0          | 12                                         | 5.1866        | 0(0-Inf)               |
| NEOPLASM, NOS, PALATE                                        | 0                                       | 0          | 1                                          | 0.8877        | 0(0-Inf)               |
| NEOPLASM, NOS, PANCREAS                                      | 2                                       | 21.744     | 10                                         | 5.6716        | 3.8338(0.8297-17.7152) |
| NEOPLASM, NOS, PARATHYROID GLAND                             | 0                                       | 0          | 1                                          | 0.234         | 0(0-Inf)               |
| NEOPLASM, NOS, PAROTID                                       | 1                                       | 9.1903     | 20                                         | 8.8125        | 1.0429(0.1391-7.8186)  |
| NEOPLASM, NOS, PELVIC CAVITY, NOS                            | 0                                       | 0          | 4                                          | 0.9238        | 0(0-Inf)               |
| NEOPLASM, NOS, PITUITARY                                     | 1                                       | 10.0546    | 20                                         | 10.0727       | 0.9982(0.1333-7.4773)  |
| NEOPLASM, NOS, RECTOSIGMOID JUNCTION                         | 0                                       | 0          | 1                                          | 2.4859        | 0(0-Inf)               |
| NEOPLASM, NOS, RECTUM                                        | 0                                       | 0          | 7                                          | 3.8033        | 0(0-Inf)               |
| NEOPLASM, NOS, RETROPERITONEUM                               | 0                                       | 0          | 2                                          | 0.5908        | 0(0-Inf)               |
| NEOPLASM, NOS, SALIVARY GLAND                                | 0                                       | 0          | 6                                          | 1.4007        | 0(0-Inf)               |
| NEOPLASM, NOS, SKIN, CODE SITE IF GIVEN                      | 0                                       | 0          | 22                                         | 8.6899        | 0(0-Inf)               |
| NEOPLASM, NOS, SOFT TISSUE, CODE SITE IF GIVEN               | 0                                       | 0          | 2                                          | 0.4709        | 0(0-Inf)               |
| NEOPLASM, NOS, SPINAL CORD                                   | 1                                       | 6.9365     | 6                                          | 1.5203        | 4.5627(0.5371-38.7634) |
| NEOPLASM, NOS, STOMACH                                       | 1                                       | 9.5468     | 6                                          | 2.7969        | 3.4133(0.4045-28.8054) |
| NEOPLASM, NOS, TENDON SHEATH                                 | 0                                       | 0          | 1                                          | 0.234         | 0(0-Inf)               |
| NEOPLASM, NOS, THORACIC ORGAN, NOS                           | 0                                       | 0          | 1                                          | 0.4051        | 0(0-Inf)               |
| NEOPLASM, NOS, THROAT, NOS                                   | 0                                       | 0          | 1                                          | 2.4861        | 0(0-Inf)               |
| NEOPLASM, NOS, THYROID                                       | 0                                       | 0          | 4                                          | 1.6245        | 0(0-Inf)               |
| NEOPLASM, NOS, TONGUE                                        | 0                                       | 0          | 3                                          | 0.7174        | 0(0-Inf)               |
| NEOPLASM, NOS, TONSIL                                        | 0                                       | 0          | 1                                          | 0.8878        | 0(0-Inf)               |
| NEOPLASM, NOS, TRACHEA                                       | 0                                       | 0          | 2                                          | 0.8096        | 0(0-Inf)               |
| NEOPLASM, NOS, TRUNK, SKIN                                   | 0                                       | 0          | 20                                         | 8.0645        | 0(0-Inf)               |
| NEOPLASM, NOS, TRUNK, SOFT TISSUE                            | 0                                       | 0          | 3                                          | 1.211         | 0(0-Inf)               |
| NEOPLASM, NOS, UPPER EXTREMITY, SKIN                         | 0                                       | 0          | 19                                         | 6.0893        | 0(0-Inf)               |
| NEOPLASM, NOS, UPPER EXTREMITY, SOFT TISSUE                  | 0                                       | 0          | 11                                         | 3.4792        | 0(0-Inf)               |
| NEOPLASM, NOS, URETER                                        | 0                                       | 0          | 6                                          | 2.7533        | 0(0-Inf)               |
| NEOPLASM, NOS, URETHRA                                       | 0                                       | 0          | 3                                          | 2.8219        | 0(0-Inf)               |
| NEOPLASM, NOS, URINARY SYSTEM                                | 0                                       | 0          | 1                                          | 0.8528        | 0(0-Inf)               |
| NEOPLASM, NOS, VAGINA                                        | 0                                       | 0          | 1                                          | 0.398         | 0(0-Inf)               |
| NEOVASCULARIZATION (EYE)                                     | 5                                       | 44.2417    | 140                                        | 57.8711       | 0.7645(0.3126-1.8693)  |
| NEPHRITIS, LUPUS                                             | 0                                       | 0          | 5                                          | 1.1412        | 0(0-Inf)               |
| NEPHRITIS, NOS, SEE ALSO GLOMERULONEPHRITIS                  | 2                                       | 14.377     | 19                                         | 5.4115        | 2.6568(0.6123-11.5272) |
| NEPHROCALCINOSIS                                             | 0                                       | 0          | 6                                          | 1.9397        | 0(0-Inf)               |
| NEPHROLITHIASIS (SEE ALSO RENAL CALCULUS FOR TYPE SPECIFIED) | 21                                      | 148.9978   | 443                                        | 123.8914      | 1.2026(0.7752-1.8657)  |
| NEPHROPATHY, ANALGESIC                                       | 0                                       | 0          | 4                                          | 1.0351        | 0(0-Inf)               |
| NEPHROPATHY, DIABETIC, NOS                                   | 24                                      | 206.5346   | 616                                        | 243.1449      | 0.8494(0.5644-1.2784)  |

| Description                                                  | No. of Positive Cases with Disease Code | Case Rate* | No. of Positive Controls with Disease Code | Control Rate* | Relative Risk (95%CI)    |
|--------------------------------------------------------------|-----------------------------------------|------------|--------------------------------------------|---------------|--------------------------|
| NEPHROPATHY, DRUG-INDUCED, CODE ALSO EFFECT, ADVERSE BY DRUG | 1                                       | 9.926      | 1                                          | 0.494         | 20.0929(1.2009-336.1772) |
| NEPHROPATHY, GOUTY                                           | 0                                       | 0          | 1                                          | 1.9072        | 0(0-Inf)                 |
| NEPHROPATHY, IGG - IGA                                       | 0                                       | 0          | 8                                          | 2.3141        | 0(0-Inf)                 |
| NEPHROPATHY, INTERSTITIAL                                    | 0                                       | 0          | 1                                          | 0.4048        | 0(0-Inf)                 |
| NEPHROPATHY, LIGHT CHAIN                                     | 1                                       | 10.1063    | 0                                          | 0             | 14196745086.5832(0-Inf)  |
| NEPHROPATHY, NEC, SEE ALSO GLOMERULONEPHRITIS                | 0                                       | 0          | 3                                          | 0.9608        | 0(0-Inf)                 |
| NEPHROPATHY, NOS                                             | 4                                       | 29.4395    | 50                                         | 15.1347       | 1.9452(0.6988-5.4144)    |
| NEPHROPATHY, OBSTRUCTIVE                                     | 0                                       | 0          | 4                                          | 2.7555        | 0(0-Inf)                 |
| NEPHROPATHY, PROTEIN-LOSING                                  | 1                                       | 10.1762    | 4                                          | 2.0555        | 4.9508(0.5414-45.2753)   |
| NEPHROPATHY, TOXIC                                           | 0                                       | 0          | 1                                          | 0.3526        | 0(0-Inf)                 |
| NEPHROSCLEROSIS, ARTERIOLAR                                  | 3                                       | 28.8654    | 21                                         | 9.934         | 2.9057(0.8605-9.8125)    |
| NEPHROSCLEROSIS, NOS, SEE ALSO SCLEROSIS                     | 7                                       | 77.6704    | 68                                         | 39.1052       | 1.9862(0.9091-4.3392)    |
| NEPHROSIS, NOS, SEE ALSO GLOMERULONEPHRITIS                  | 1                                       | 7.6949     | 1                                          | 0.3293        | 23.3639(1.3839-394.4512) |
| NERVOUSNESS                                                  | 0                                       | 0          | 29                                         | 7.025         | 0(0-Inf)                 |
| NEURALGIA, ANKLE                                             | 0                                       | 0          | 1                                          | 0.8877        | 0(0-Inf)                 |
| NEURALGIA, ARM                                               | 1                                       | 7.0563     | 15                                         | 4.026         | 1.7527(0.2291-13.4095)   |
| NEURALGIA, AURICULOTEMPORAL                                  | 0                                       | 0          | 1                                          | 0.2729        | 0(0-Inf)                 |
| NEURALGIA, CERVICAL                                          | 0                                       | 0          | 18                                         | 4.6885        | 0(0-Inf)                 |
| NEURALGIA, CRANIAL, IX                                       | 0                                       | 0          | 1                                          | 2.4864        | 0(0-Inf)                 |
| NEURALGIA, CRANIAL, NOS                                      | 0                                       | 0          | 3                                          | 0.9609        | 0(0-Inf)                 |
| NEURALGIA, CRANIAL, V (SEE ALSO NEURALGIA, TRIGEMINAL)       | 1                                       | 13.5261    | 0                                          | 0             | 20069615172.9024(0-Inf)  |
| NEURALGIA, CRANIAL, VII                                      | 0                                       | 0          | 1                                          | 0.8884        | 0(0-Inf)                 |
| NEURALGIA, EAR                                               | 0                                       | 0          | 8                                          | 1.8859        | 0(0-Inf)                 |
| NEURALGIA, FACIAL (SEVENTH CRANIAL)                          | 1                                       | 7.5868     | 31                                         | 9.8334        | 0.7715(0.1048-5.6799)    |
| NEURALGIA, FINGER                                            | 0                                       | 0          | 4                                          | 0.9709        | 0(0-Inf)                 |
| NEURALGIA, FLANK                                             | 0                                       | 0          | 2                                          | 1.1619        | 0(0-Inf)                 |
| NEURALGIA, FOOT                                              | 3                                       | 22.6539    | 26                                         | 8.1596        | 2.7763(0.8327-9.2567)    |
| NEURALGIA, FOREARM                                           | 0                                       | 0          | 2                                          | 0.5069        | 0(0-Inf)                 |
| NEURALGIA, FOREHEAD                                          | 0                                       | 0          | 1                                          | 0.8885        | 0(0-Inf)                 |
| NEURALGIA, GLOSSOPHARYNGEAL (NINTH CRANIAL)                  | 0                                       | 0          | 5                                          | 1.3718        | 0(0-Inf)                 |
| NEURALGIA, GROIN                                             | 0                                       | 0          | 5                                          | 1.2018        | 0(0-Inf)                 |
| NEURALGIA, HAND                                              | 0                                       | 0          | 2                                          | 1.7056        | 0(0-Inf)                 |
| NEURALGIA, HEAD                                              | 0                                       | 0          | 12                                         | 3.8465        | 0(0-Inf)                 |
| NEURALGIA, HEEL                                              | 0                                       | 0          | 1                                          | 0.2354        | 0(0-Inf)                 |
| NEURALGIA, HERPETIC, CODE ALSO BY SITE IF STATED             | 3                                       | 30.5368    | 44                                         | 22.8642       | 1.3356(0.4129-4.3203)    |
| NEURALGIA, HIP                                               | 0                                       | 0          | 1                                          | 0.4049        | 0(0-Inf)                 |
| NEURALGIA, ILIAC REGION                                      | 0                                       | 0          | 1                                          | 0.2354        | 0(0-Inf)                 |
| NEURALGIA, INGUINAL                                          | 0                                       | 0          | 4                                          | 1.112         | 0(0-Inf)                 |
| NEURALGIA, INTERCOSTAL                                       | 0                                       | 0          | 9                                          | 2.121         | 0(0-Inf)                 |

| Description                                                                             | No. of Positive Cases with Disease Code | Case Rate* | No. of Positive Controls with Disease Code | Control Rate* | Relative Risk (95%CI) |
|-----------------------------------------------------------------------------------------|-----------------------------------------|------------|--------------------------------------------|---------------|-----------------------|
| NEURALGIA, INTERCOSTAL, POSTHERPETIC                                                    | 0                                       | 0          | 2                                          | 0.591         | 0(0-Inf)              |
| NEURALGIA, JAW                                                                          | 0                                       | 0          | 1                                          | 0.2729        | 0(0-Inf)              |
| NEURALGIA, KNEE                                                                         | 0                                       | 0          | 2                                          | 0.9504        | 0(0-Inf)              |
| NEURALGIA, LEG                                                                          | 4                                       | 39.7195    | 31                                         | 15.348        | 2.5879(0.9074-7.3804) |
| NEURALGIA, LUMBAR                                                                       | 0                                       | 0          | 4                                          | 1.6247        | 0(0-Inf)              |
| NEURALGIA, MASTOID                                                                      | 0                                       | 0          | 1                                          | 0.3527        | 0(0-Inf)              |
| NEURALGIA, MEDIAN                                                                       | 0                                       | 0          | 1                                          | 0.398         | 0(0-Inf)              |
| NEURALGIA, MOUTH                                                                        | 0                                       | 0          | 2                                          | 0.8101        | 0(0-Inf)              |
| NEURALGIA, NOS, SEE ALSO NEURITIS                                                       | 5                                       | 39.6478    | 85                                         | 28.9556       | 1.3693(0.5536-3.3867) |
| NEURALGIA, OCCIPITAL                                                                    | 7                                       | 48.7794    | 136                                        | 34.3827       | 1.4187(0.6615-3.0426) |
| NEURALGIA, OPHTHALMIC POSTHERPETIC                                                      | 0                                       | 0          | 1                                          | 0.3527        | 0(0-Inf)              |
| NEURALGIA, PERINEUM                                                                     | 0                                       | 0          | 1                                          | 0.8528        | 0(0-Inf)              |
| NEURALGIA, PHARYNX                                                                      | 0                                       | 0          | 1                                          | 0.234         | 0(0-Inf)              |
| NEURALGIA, POST HERPETIC (CODE ALSO HERPES ZOSTER LATE EFFECT)                          | 16                                      | 175.4056   | 233                                        | 132.53        | 1.3235(0.7961-2.2002) |
| NEURALGIA, PRE-AURICULAR                                                                | 0                                       | 0          | 1                                          | 0.8543        | 0(0-Inf)              |
| NEURALGIA, RADIAL                                                                       | 0                                       | 0          | 3                                          | 1.2147        | 0(0-Inf)              |
| NEURALGIA, SCALP                                                                        | 0                                       | 0          | 5                                          | 1.5263        | 0(0-Inf)              |
| NEURALGIA, SCIATIC NERVE                                                                | 0                                       | 0          | 3                                          | 0.6536        | 0(0-Inf)              |
| NEURALGIA, SHOULDER                                                                     | 0                                       | 0          | 8                                          | 2.0552        | 0(0-Inf)              |
| NEURALGIA, SUPRAORBITAL                                                                 | 0                                       | 0          | 3                                          | 0.8118        | 0(0-Inf)              |
| NEURALGIA, THIGH                                                                        | 0                                       | 0          | 8                                          | 2.882         | 0(0-Inf)              |
| NEURALGIA, THUMB                                                                        | 0                                       | 0          | 1                                          | 0.398         | 0(0-Inf)              |
| NEURALGIA, TONGUE                                                                       | 0                                       | 0          | 1                                          | 0.2354        | 0(0-Inf)              |
| NEURALGIA, TRIGEMINAL (FIFTH CRANIAL), FIRST DIVISION                                   | 1                                       | 9.4542     | 18                                         | 8.2778        | 1.1421(0.1515-8.6104) |
| NEURALGIA, TRIGEMINAL (FIFTH CRANIAL), NOS                                              | 7                                       | 53.6861    | 129                                        | 41.5275       | 1.2928(0.6024-2.7746) |
| NEURALGIA, TRIGEMINAL (FIFTH CRANIAL), SECOND DIVISION                                  | 0                                       | 0          | 40                                         | 12.7499       | 0(0-Inf)              |
| NEURALGIA, TRIGEMINAL (FIFTH CRANIAL), THIRD DIVISION                                   | 1                                       | 7.7787     | 29                                         | 9.66          | 0.8052(0.1091-5.9425) |
| NEURALGIA, TROCHLEAR (FOURTH CRANIAL)                                                   | 0                                       | 0          | 1                                          | 0.2354        | 0(0-Inf)              |
| NEURALGIA, TYMPANIC PLEXUS                                                              | 0                                       | 0          | 1                                          | 0.234         | 0(0-Inf)              |
| NEURALGIA, ULNAR                                                                        | 0                                       | 0          | 6                                          | 1.4353        | 0(0-Inf)              |
| NEURALGIA, WRIST                                                                        | 0                                       | 0          | 2                                          | 0.5837        | 0(0-Inf)              |
| NEURASTHENIA (SEE ALSO EXHAUSTION)                                                      | 0                                       | 0          | 6                                          | 2.203         | 0(0-Inf)              |
| NEURILEMMOMA, ACOUSTIC, MALIGNANT                                                       | 0                                       | 0          | 1                                          | 0.2729        | 0(0-Inf)              |
| NEURILEMMOMA, ACOUSTIC, NOS                                                             | 1                                       | 7.0041     | 7                                          | 1.7117        | 4.092(0.4937-33.9134) |
| NEURILEMMOMA, BRAIN                                                                     | 0                                       | 0          | 1                                          | 0.234         | 0(0-Inf)              |
| NEURILEMMOMA, MALIGNANT/METASTATIC, NEC, CODE ALSO NEOPLASM MALIGNANT BY SITE IF STATED | 0                                       | 0          | 2                                          | 0.8723        | 0(0-Inf)              |
| NEURILEMMOMA, NOS, CODE ALSO NEO BENIGN BY SITE IF STATED                               | 5                                       | 35.7112    | 56                                         | 15.8311       | 2.2558(0.8988-5.6615) |



| Description                                                                                      | No. of Positive Cases with Disease Code | Case Rate* | No. of Positive Controls with Disease Code | Control Rate* | Relative Risk (95%CI)   |
|--------------------------------------------------------------------------------------------------|-----------------------------------------|------------|--------------------------------------------|---------------|-------------------------|
| NEURILEMMOMA, SPINAL CORD                                                                        | 0                                       | 0          | 4                                          | 1.4707        | 0(0-Inf)                |
| NEURITIS, ARM                                                                                    | 0                                       | 0          | 3                                          | 0.9167        | 0(0-Inf)                |
| NEURITIS, BACK                                                                                   | 0                                       | 0          | 7                                          | 2.2846        | 0(0-Inf)                |
| NEURITIS, BRACHIAL                                                                               | 0                                       | 0          | 4                                          | 1.3629        | 0(0-Inf)                |
| NEURITIS, CHEST WALL                                                                             | 0                                       | 0          | 18                                         | 5.7671        | 0(0-Inf)                |
| NEURITIS, CRANIAL, III                                                                           | 0                                       | 0          | 1                                          | 0.234         | 0(0-Inf)                |
| NEURITIS, CRANIAL, NOS                                                                           | 0                                       | 0          | 2                                          | 0.4681        | 0(0-Inf)                |
| NEURITIS, CRANIAL, V (SEE ALSO NEURALGIA, TRIGEMINAL)                                            | 0                                       | 0          | 1                                          | 0.3526        | 0(0-Inf)                |
| NEURITIS, CRANIAL, VII                                                                           | 0                                       | 0          | 1                                          | 0.398         | 0(0-Inf)                |
| NEURITIS, CRANIAL, VIII                                                                          | 0                                       | 0          | 4                                          | 1.1114        | 0(0-Inf)                |
| NEURITIS, FACIAL (SEVENTH CRANIAL)                                                               | 0                                       | 0          | 4                                          | 1.3735        | 0(0-Inf)                |
| NEURITIS, FEMORAL                                                                                | 0                                       | 0          | 9                                          | 2.1398        | 0(0-Inf)                |
| NEURITIS, HERPETIC, CODE ALSO BY SITE IF STATED                                                  | 0                                       | 0          | 3                                          | 2.094         | 0(0-Inf)                |
| NEURITIS, INTERCOSTAL                                                                            | 0                                       | 0          | 5                                          | 1.2869        | 0(0-Inf)                |
| NEURITIS, LEG                                                                                    | 0                                       | 0          | 15                                         | 5.0179        | 0(0-Inf)                |
| NEURITIS, MEDIAN                                                                                 | 1                                       | 7.0152     | 8                                          | 2.0891        | 3.358(0.4121-27.3632)   |
| NEURITIS, MEDIAN THENAR                                                                          | 0                                       | 0          | 4                                          | 1.0139        | 0(0-Inf)                |
| NEURITIS, NECK                                                                                   | 0                                       | 0          | 3                                          | 0.7175        | 0(0-Inf)                |
| NEURITIS, NOS, SEE ALSO NEURALGIA                                                                | 1                                       | 7.1011     | 14                                         | 3.8084        | 1.8646(0.2424-14.3415)  |
| NEURITIS, OPTIC (SECOND CRANIAL), ISCHEMIC                                                       | 0                                       | 0          | 2                                          | 0.7055        | 0(0-Inf)                |
| NEURITIS, OPTIC (SECOND CRANIAL), NOS                                                            | 0                                       | 0          | 24                                         | 5.5376        | 0(0-Inf)                |
| NEURITIS, OPTIC NEC                                                                              | 1                                       | 7.0636     | 9                                          | 2.065         | 3.4207(0.4255-27.4989)  |
| NEURITIS, PERIPHERAL                                                                             | 0                                       | 0          | 10                                         | 3.2034        | 0(0-Inf)                |
| NEURITIS, PLANTAR                                                                                | 0                                       | 0          | 1                                          | 0.2354        | 0(0-Inf)                |
| NEURITIS, PRESSURE, NEC                                                                          | 0                                       | 0          | 1                                          | 0.2729        | 0(0-Inf)                |
| NEURITIS, RADIAL                                                                                 | 0                                       | 0          | 17                                         | 4.2249        | 0(0-Inf)                |
| NEURITIS, RETROBULBAR                                                                            | 0                                       | 0          | 11                                         | 3.8429        | 0(0-Inf)                |
| NEURITIS, RETROBULBAR, OLD                                                                       | 0                                       | 0          | 4                                          | 1.3528        | 0(0-Inf)                |
| NEURITIS, SCIATIC                                                                                | 0                                       | 0          | 12                                         | 3.0057        | 0(0-Inf)                |
| NEURITIS, THORACIC                                                                               | 0                                       | 0          | 12                                         | 2.8466        | 0(0-Inf)                |
| NEURITIS, TRIGEMINAL (V CRANIAL) (SEE ALSO NEURALGIA, TRIGEMINAL)                                | 0                                       | 0          | 2                                          | 0.5709        | 0(0-Inf)                |
| NEURITIS, ULNAR                                                                                  | 0                                       | 0          | 49                                         | 11.8669       | 0(0-Inf)                |
| NEURITIS, VESTIBULAR                                                                             | 0                                       | 0          | 3                                          | 0.8018        | 0(0-Inf)                |
| NEURODERMATITIS, NOS                                                                             | 35                                      | 254.0648   | 686                                        | 172.5961      | 1.472(1.0466-2.0703)    |
| NEURODERMATITIS, STASIS                                                                          | 0                                       | 0          | 5                                          | 1.3914        | 0(0-Inf)                |
| NEUROFIBROMA, MULTIPLE                                                                           | 1                                       | 11.1131    | 3                                          | 0.8714        | 12.753(1.2828-126.7805) |
| NEUROFIBROMA, NOS, CODE ALSO NEOPLASM BENIGN BY SITE (SEE ALSO NEURILEMMOMA FOR SPECIFIED NERVE) | 10                                      | 69.9338    | 240                                        | 62.4031       | 1.1207(0.5942-2.1138)   |
| NEUROFIBROMATOSIS                                                                                | 1                                       | 7.6001     | 5                                          | 1.2057        | 6.3034(0.7178-55.3519)  |

| Description                                            | No. of Positive Cases with Disease Code | Case Rate* | No. of Positive Controls with Disease Code | Control Rate* | Relative Risk (95%CI)  |
|--------------------------------------------------------|-----------------------------------------|------------|--------------------------------------------|---------------|------------------------|
| NEUROFIBROSARCOMA CODE ALSO NEOPLASM MALIGNANT BY SITE | 0                                       | 0          | 1                                          | 0.8272        | 0(0-Inf)               |
| NEUROGENIC, BLADDER, FLACCID                           | 0                                       | 0          | 1                                          | 0.8528        | 0(0-Inf)               |
| NEUROGENIC, BLADDER, NOS                               | 10                                      | 87.8037    | 225                                        | 91.5354       | 0.9592(0.5083-1.8104)  |
| NEUROGENIC, BOWEL                                      | 3                                       | 20.9038    | 59                                         | 15.3542       | 1.3614(0.4249-4.3627)  |
| NEUROGLYCOPENIA (TRANSIENT)                            | 0                                       | 0          | 1                                          | 0.2354        | 0(0-Inf)               |
| NEUROLEPROSY                                           | 0                                       | 0          | 1                                          | 2.4856        | 0(0-Inf)               |
| NEUROMA, AMPUTATION, SURGICAL                          | 0                                       | 0          | 3                                          | 0.6986        | 0(0-Inf)               |
| NEUROMA, AUDITORY NERVE (ACOUSTIC)                     | 1                                       | 6.9338     | 15                                         | 3.7365        | 1.8557(0.2425-14.2022) |
| NEUROMA, DIGITAL (LOWER EXTREMITY#)                    | 0                                       | 0          | 21                                         | 6.5055        | 0(0-Inf)               |
| NEUROMA, INTERDIGITAL (WEB SPACE), FOOT                | 1                                       | 7.7485     | 179                                        | 40.9999       | 0.189(0.0264-1.3504)   |
| NEUROMA, INTERMETATARSAL                               | 0                                       | 0          | 7                                          | 1.6581        | 0(0-Inf)               |
| NEUROMA, LOWER EXTREMITY                               | 3                                       | 24.4659    | 49                                         | 11.4076       | 2.1447(0.6645-6.922)   |
| NEUROMA, MORTON'S                                      | 4                                       | 28.534     | 149                                        | 34.4144       | 0.8291(0.3064-2.2437)  |
| NEUROMA, NOS                                           | 0                                       | 0          | 38                                         | 10.2183       | 0(0-Inf)               |
| NEUROMA, PLANTAR                                       | 1                                       | 8.7063     | 107                                        | 25.0875       | 0.347(0.0484-2.4896)   |
| NEUROMA, PLANTAR, BILATERAL                            | 1                                       | 8.9659     | 6                                          | 1.4083        | 6.3662(0.748-54.1839)  |
| NEUROMA, TRAUMATIC                                     | 1                                       | 9.3438     | 11                                         | 2.7142        | 3.4426(0.4382-27.0468) |
| NEUROMA, UPPER EXTREMITY                               | 1                                       | 7.6949     | 30                                         | 7.198         | 1.069(0.145-7.8821)    |
| NEUROMYOPATHY (NOS)                                    | 0                                       | 0          | 3                                          | 1.0577        | 0(0-Inf)               |
| NEURONEVUS                                             | 0                                       | 0          | 3                                          | 0.9609        | 0(0-Inf)               |
| NEURONITIS, NOS                                        | 1                                       | 7.1202     | 5                                          | 1.3832        | 5.1477(0.586-45.2174)  |
| NEURONITIS, VESTIBULAR                                 | 2                                       | 13.9642    | 73                                         | 17.5307       | 0.7966(0.1948-3.2566)  |
| NEURONOPATHY, MOTOR                                    | 0                                       | 0          | 1                                          | 0.3526        | 0(0-Inf)               |
| NEURONOPATHY, SENSORY                                  | 0                                       | 0          | 4                                          | 1.6245        | 0(0-Inf)               |
| NEUROPATHY, ALCOHOLIC                                  | 0                                       | 0          | 5                                          | 2.0598        | 0(0-Inf)               |
| NEUROPATHY, ARM                                        | 0                                       | 0          | 9                                          | 2.7508        | 0(0-Inf)               |
| NEUROPATHY, AUTONOMIC                                  | 5                                       | 35.8426    | 39                                         | 11.0258       | 3.2508(1.2713-8.3122)  |
| NEUROPATHY, AXILLARY NERVE                             | 0                                       | 0          | 1                                          | 0.234         | 0(0-Inf)               |
| NEUROPATHY, BRACHIAL                                   | 0                                       | 0          | 1                                          | 0.2729        | 0(0-Inf)               |
| NEUROPATHY, BRACHIAL PLEXUS                            | 1                                       | 8.4045     | 8                                          | 2.1399        | 3.9276(0.4842-31.8579) |
| NEUROPATHY, CERVICAL                                   | 0                                       | 0          | 3                                          | 1.2146        | 0(0-Inf)               |
| NEUROPATHY, COMPRESSION                                | 0                                       | 0          | 41                                         | 11.2368       | 0(0-Inf)               |
| NEUROPATHY, CRANIAL, SEE ALSO NEURITIS OR NEURALGIA    | 0                                       | 0          | 5                                          | 2.0355        | 0(0-Inf)               |
| NEUROPATHY, DIABETIC, CODE SITE IF GIVEN               | 28                                      | 243.6968   | 559                                        | 223.1561      | 1.092(0.7463-1.598)    |
| NEUROPATHY, FAMILIAL                                   | 0                                       | 0          | 7                                          | 3.9625        | 0(0-Inf)               |
| NEUROPATHY, FEMORAL                                    | 3                                       | 21.0287    | 33                                         | 8.7212        | 2.4112(0.7339-7.9222)  |
| NEUROPATHY, FOOT                                       | 3                                       | 23.8229    | 30                                         | 10.393        | 2.2922(0.6944-7.5668)  |
| NEUROPATHY, GENITOFEMORAL                              | 0                                       | 0          | 1                                          | 0.3526        | 0(0-Inf)               |
| NEUROPATHY, HAND                                       | 1                                       | 8.5703     | 6                                          | 1.5963        | 5.3687(0.6341-45.4558) |

| Description                                       | No. of Positive Cases with Disease Code | Case Rate* | No. of Positive Controls with Disease Code | Control Rate* | Relative Risk (95%CI)  |
|---------------------------------------------------|-----------------------------------------|------------|--------------------------------------------|---------------|------------------------|
| NEUROPATHY, HEREDITARY                            | 2                                       | 16.6297    | 20                                         | 7.4847        | 2.2218(0.5148-9.5893)  |
| NEUROPATHY, LOWER EXTREMITY                       | 3                                       | 27.2981    | 85                                         | 36.8544       | 0.7407(0.2336-2.3482)  |
| NEUROPATHY, LUMBAR                                | 3                                       | 21.5778    | 31                                         | 8.9996        | 2.3976(0.7277-7.8996)  |
| NEUROPATHY, MEDIAN NERVE                          | 8                                       | 57.2802    | 159                                        | 44.987        | 1.2733(0.6243-2.5967)  |
| NEUROPATHY, MEDIAN THENAR                         | 0                                       | 0          | 13                                         | 3.0813        | 0(0-Inf)               |
| NEUROPATHY, MENTAL                                | 0                                       | 0          | 1                                          | 0.4048        | 0(0-Inf)               |
| NEUROPATHY, MOTOR, NEC/NOS                        | 0                                       | 0          | 22                                         | 9.26          | 0(0-Inf)               |
| NEUROPATHY, MULTIFOCAL MOTOR                      | 0                                       | 0          | 2                                          | 0.5709        | 0(0-Inf)               |
| NEUROPATHY, NERVE, FACIAL (CRANIAL VII)           | 0                                       | 0          | 2                                          | 1.1973        | 0(0-Inf)               |
| NEUROPATHY, NERVE, THORACIC                       | 0                                       | 0          | 4                                          | 1.0351        | 0(0-Inf)               |
| NEUROPATHY, NOS                                   | 9                                       | 79.7893    | 268                                        | 111.2832      | 0.717(0.3685-1.395)    |
| NEUROPATHY, OPTIC, ISCHEMIC                       | 0                                       | 0          | 43                                         | 21.6469       | 0(0-Inf)               |
| NEUROPATHY, OPTIC, NOS                            | 0                                       | 0          | 20                                         | 6.96          | 0(0-Inf)               |
| NEUROPATHY, OPTIC, TRAUMATIC                      | 0                                       | 0          | 2                                          | 0.5908        | 0(0-Inf)               |
| NEUROPATHY, PEDAL                                 | 0                                       | 0          | 1                                          | 0.2354        | 0(0-Inf)               |
| NEUROPATHY, PERIPHERAL                            | 62                                      | 636.9305   | 1196                                       | 590.7492      | 1.0782(0.8347-1.3927)  |
| NEUROPATHY, PERIPHERAL MOTOR (CHRONIC)            | 4                                       | 40.4764    | 73                                         | 37.3564       | 1.0835(0.395-2.9723)   |
| NEUROPATHY, PERIPHERAL NERVE, NUTRITIONAL         | 0                                       | 0          | 4                                          | 1.0119        | 0(0-Inf)               |
| NEUROPATHY, PERIPHERAL NERVE, TRAUMATIC           | 0                                       | 0          | 1                                          | 0.234         | 0(0-Inf)               |
| NEUROPATHY, PERIPHERAL SENSORY (CHRONIC)          | 7                                       | 59.7405    | 163                                        | 64.4297       | 0.9272(0.4343-1.9797)  |
| NEUROPATHY, PERIPHERAL, AUTONOMIC                 | 0                                       | 0          | 2                                          | 0.5069        | 0(0-Inf)               |
| NEUROPATHY, PERIPHERAL, CHRONIC                   | 1                                       | 13.0699    | 15                                         | 10.9145       | 1.1975(0.1573-9.1149)  |
| NEUROPATHY, PERONEAL                              | 1                                       | 7.6295     | 52                                         | 16.9313       | 0.4506(0.0621-3.2684)  |
| NEUROPATHY, PRESSURE                              | 1                                       | 10.673     | 7                                          | 1.9884        | 5.3676(0.6483-44.441)  |
| NEUROPATHY, RADIAL                                | 0                                       | 0          | 9                                          | 3.52          | 0(0-Inf)               |
| NEUROPATHY, RADICULAR, SEE ALSO RADICULITIS       | 0                                       | 0          | 1                                          | 0.2729        | 0(0-Inf)               |
| NEUROPATHY, SACRAL                                | 1                                       | 7.3657     | 6                                          | 1.8344        | 4.0154(0.4742-34.0036) |
| NEUROPATHY, SAPHENOUS                             | 0                                       | 0          | 5                                          | 1.1788        | 0(0-Inf)               |
| NEUROPATHY, SCIATICA                              | 1                                       | 7.0511     | 12                                         | 2.8589        | 2.4664(0.3165-19.2185) |
| NEUROPATHY, SENSORY, NEC/NOS                      | 2                                       | 20.6787    | 75                                         | 39.3581       | 0.5254(0.1287-2.1441)  |
| NEUROPATHY, SPINAL                                | 0                                       | 0          | 2                                          | 1.7759        | 0(0-Inf)               |
| NEUROPATHY, SURAL NERVE                           | 1                                       | 8.365      | 3                                          | 1.1878        | 7.0423(0.7171-69.1546) |
| NEUROPATHY, TOXIC                                 | 2                                       | 13.8533    | 8                                          | 1.9443        | 7.1252(1.4772-34.3682) |
| NEUROPATHY, TRIGEMINAL SENSORY                    | 0                                       | 0          | 17                                         | 4.1942        | 0(0-Inf)               |
| NEUROPATHY, ULNAR                                 | 15                                      | 106.3886   | 325                                        | 88.0449       | 1.2083(0.7189-2.031)   |
| NEUROPATHY, UPPER EXTREMITY                       | 1                                       | 7.1454     | 27                                         | 6.5191        | 1.0961(0.1481-8.1116)  |
| NEUROPRAXIA (NEURAPRAXIA)                         | 0                                       | 0          | 19                                         | 4.8385        | 0(0-Inf)               |
| NEUROSARCOMA CODE ALSO NEOPLASM MALIGNANT BY SITE | 0                                       | 0          | 1                                          | 0.398         | 0(0-Inf)               |
| NEUROSIS, ANXIETY                                 | 3                                       | 26.4904    | 117                                        | 28.6254       | 0.9254(0.2934-2.9185)  |
| NEUROSIS, CARDIAC                                 | 0                                       | 0          | 9                                          | 2.0945        | 0(0-Inf)               |

| Description                              | No. of Positive Cases with Disease Code | Case Rate* | No. of Positive Controls with Disease Code | Control Rate* | Relative Risk (95%CI)  |
|------------------------------------------|-----------------------------------------|------------|--------------------------------------------|---------------|------------------------|
| NEUROSIS, DEPRESSIVE                     | 0                                       | 0          | 26                                         | 8.3883        | 0(0-Inf)               |
| NEUROSIS, HYSTERICAL, CONVERSION TYPE    | 0                                       | 0          | 1                                          | 0.2355        | 0(0-Inf)               |
| NEUROSIS, HYSTERICAL, DISSOCIATIVE TYPE  | 0                                       | 0          | 2                                          | 1.3986        | 0(0-Inf)               |
| NEUROSIS, NOS                            | 1                                       | 12.3684    | 23                                         | 6.5596        | 1.8855(0.253-14.0547)  |
| NEUROSIS, OBSESSIVE-COMPULSIVE           | 0                                       | 0          | 6                                          | 1.7335        | 0(0-Inf)               |
| NEUROSIS, PHOBIC                         | 0                                       | 0          | 5                                          | 2.0666        | 0(0-Inf)               |
| NEUROSYPHILIS, NOS                       | 0                                       | 0          | 1                                          | 0.234         | 0(0-Inf)               |
| NEUROTROPHIC, CORNEA                     | 0                                       | 0          | 3                                          | 2.8246        | 0(0-Inf)               |
| NEUROTROPHIC, FOOT                       | 0                                       | 0          | 2                                          | 0.4709        | 0(0-Inf)               |
| NEUROTROPHIC, JOINT                      | 0                                       | 0          | 1                                          | 2.486         | 0(0-Inf)               |
| NEUTROPENIA, IMMUNE (OF INFANCY)         | 0                                       | 0          | 1                                          | 0.2354        | 0(0-Inf)               |
| NEUTROPENIA, NOS                         | 10                                      | 76.8176    | 185                                        | 60.1976       | 1.2761(0.6737-2.4172)  |
| NEUTROPHILIA                             | 0                                       | 0          | 14                                         | 5.5283        | 0(0-Inf)               |
| NEVUS, AMELANOTIC                        | 0                                       | 0          | 4                                          | 1.5792        | 0(0-Inf)               |
| NEVUS, ANEMICUS                          | 0                                       | 0          | 6                                          | 1.7847        | 0(0-Inf)               |
| NEVUS, ARANEOUS                          | 0                                       | 0          | 4                                          | 1.1676        | 0(0-Inf)               |
| NEVUS, BALLOON CELL                      | 0                                       | 0          | 2                                          | 0.4681        | 0(0-Inf)               |
| NEVUS, BECKER'S                          | 0                                       | 0          | 1                                          | 0.2729        | 0(0-Inf)               |
| NEVUS, BLUE                              | 5                                       | 34.8225    | 108                                        | 27.3267       | 1.2743(0.5181-3.1344)  |
| NEVUS, CELLULAR                          | 0                                       | 0          | 7                                          | 1.6025        | 0(0-Inf)               |
| NEVUS, CHOROIDAL                         | 9                                       | 68.8491    | 427                                        | 138.3181      | 0.4978(0.2569-0.9643)  |
| NEVUS, COMEDONICUS                       | 0                                       | 0          | 2                                          | 1.899         | 0(0-Inf)               |
| NEVUS, COMPOUND                          | 22                                      | 165.0579   | 720                                        | 175.2223      | 0.942(0.6157-1.4413)   |
| NEVUS, CONJUNCTIVA                       | 1                                       | 6.9715     | 17                                         | 4.0877        | 1.7055(0.2248-12.9361) |
| NEVUS, DERMAL--NEVD                      | 63                                      | 511.3277   | 1837                                       | 461.1334      | 1.1088(0.8619-1.4265)  |
| NEVUS, DYSPLASTIC                        | 1                                       | 6.9226     | 36                                         | 9.2772        | 0.7462(0.1019-5.4634)  |
| NEVUS, EPIDERMAL                         | 0                                       | 0          | 11                                         | 2.8508        | 0(0-Inf)               |
| NEVUS, EPITHELIAL                        | 0                                       | 0          | 2                                          | 0.5457        | 0(0-Inf)               |
| NEVUS, EYE, NOS, CODE ALSO BY TYPE       | 4                                       | 29.1344    | 164                                        | 48.0776       | 0.606(0.2243-1.637)    |
| NEVUS, EYE, PIGMENTED                    | 0                                       | 0          | 2                                          | 0.4853        | 0(0-Inf)               |
| NEVUS, FLAMMEUS                          | 0                                       | 0          | 2                                          | 0.8097        | 0(0-Inf)               |
| NEVUS, HAIRY                             | 1                                       | 7.335      | 9                                          | 2.1625        | 3.3918(0.423-27.196)   |
| NEVUS, INTRADERMAL                       | 20                                      | 208.2673   | 640                                        | 174.4225      | 1.194(0.7643-1.8655)   |
| NEVUS, IRIS                              | 0                                       | 0          | 38                                         | 11.4604       | 0(0-Inf)               |
| NEVUS, JUNCTIONAL                        | 12                                      | 84.1567    | 284                                        | 71.5998       | 1.1754(0.6585-2.0981)  |
| NEVUS, LINEAR                            | 0                                       | 0          | 3                                          | 0.7175        | 0(0-Inf)               |
| NEVUS, LIPOMATOSUS                       | 0                                       | 0          | 12                                         | 2.8485        | 0(0-Inf)               |
| NEVUS, MALIGNANT, NOS, SEE ALSO MELANOMA | 0                                       | 0          | 1                                          | 0.8881        | 0(0-Inf)               |
| NEVUS, NON-PIGMENTED                     | 0                                       | 0          | 3                                          | 1.3477        | 0(0-Inf)               |

| Description                                                      | No. of Positive Cases with Disease Code | Case Rate* | No. of Positive Controls with Disease Code | Control Rate* | Relative Risk (95%CI)  |
|------------------------------------------------------------------|-----------------------------------------|------------|--------------------------------------------|---------------|------------------------|
| NEVUS, NOS (BENIGN CARDIOVASCULAR TISSUE / HEMANGIOMA #)         | 4                                       | 42.5958    | 92                                         | 24.5408       | 1.7357(0.6357-4.7395)  |
| NEVUS, NOS, SKIN/DERM                                            | 38                                      | 279.5885   | 1147                                       | 341.2553      | 0.8193(0.5926-1.1328)  |
| NEVUS, OF OTA                                                    | 0                                       | 0          | 2                                          | 0.4681        | 0(0-Inf)               |
| NEVUS, PAPILLARY                                                 | 0                                       | 0          | 1                                          | 0.8533        | 0(0-Inf)               |
| NEVUS, PAPILLOMATOUS                                             | 1                                       | 12.7469    | 39                                         | 11.6947       | 1.09(0.1492-7.9649)    |
| NEVUS, PIGMENTED                                                 | 4                                       | 29.5189    | 231                                        | 55.9133       | 0.5279(0.1962-1.4206)  |
| NEVUS, PORT WINE, CODE ALSO HEMANGIOMA (SKIN) BY SITE            | 0                                       | 0          | 1                                          | 0.4049        | 0(0-Inf)               |
| NEVUS, SEBACEOUS                                                 | 1                                       | 7.0532     | 7                                          | 2.0041        | 3.5193(0.4263-29.0556) |
| NEVUS, SEBACEOUS, OF JADASSOHN                                   | 0                                       | 0          | 6                                          | 1.5598        | 0(0-Inf)               |
| NEVUS, SPIDER                                                    | 0                                       | 0          | 15                                         | 3.7858        | 0(0-Inf)               |
| NEVUS, SPILUS                                                    | 1                                       | 6.9285     | 4                                          | 1.04          | 6.6621(0.7243-61.2732) |
| NEVUS, SPITZ, CODE ALSO MELANOMA BENIGN BY SITE                  | 0                                       | 0          | 1                                          | 0.3526        | 0(0-Inf)               |
| NEVUS, VERRUCOUS                                                 | 0                                       | 0          | 1                                          | 0.3526        | 0(0-Inf)               |
| NEVUS, WHITE SPONGE                                              | 0                                       | 0          | 1                                          | 0.4751        | 0(0-Inf)               |
| NIGHTMARE                                                        | 2                                       | 17.0909    | 21                                         | 8.2283        | 2.0771(0.4829-8.9345)  |
| NOCARDIOSIS                                                      | 0                                       | 0          | 2                                          | 0.7897        | 0(0-Inf)               |
| NOCTURIA                                                         | 32                                      | 370.2289   | 445                                        | 269.2568      | 1.375(0.9595-1.9705)   |
| NODE, BOUCHARD'S                                                 | 0                                       | 0          | 5                                          | 1.2017        | 0(0-Inf)               |
| NODE, HEBERDEN'S                                                 | 3                                       | 20.9941    | 33                                         | 7.587         | 2.7671(0.8409-9.1057)  |
| NODE, SCHMORL'S                                                  | 0                                       | 0          | 3                                          | 0.6986        | 0(0-Inf)               |
| NODULE, BREAST, BENIGN                                           | 26                                      | 191.8991   | 822                                        | 189.002       | 1.0153(0.6864-1.502)   |
| NODULE, CUTANEOUS                                                | 4                                       | 27.8796    | 52                                         | 13.468        | 2.0701(0.7444-5.7562)  |
| NODULE, CYSTIC, SKIN, CODE ALSO CYST PART OF BODY SPECIFIED      | 0                                       | 0          | 1                                          | 0.2354        | 0(0-Inf)               |
| NODULE, FIBROTIC, SKIN, SEE ALSO FIBROSIS PART OF BODY SPECIFIED | 0                                       | 0          | 9                                          | 2.2237        | 0(0-Inf)               |
| NODULE, LISCH                                                    | 0                                       | 0          | 1                                          | 0.4751        | 0(0-Inf)               |
| NODULE, PROSTATIC, BENIGN                                        | 5                                       | 78.3064    | 81                                         | 57.0874       | 1.3717(0.5546-3.3926)  |
| NODULE, PROSTATIC, NOS                                           | 15                                      | 165.9444   | 467                                        | 269.6421      | 0.6154(0.3678-1.0298)  |
| NODULE, PULMONARY, INDETERMINATE                                 | 28                                      | 230.5855   | 498                                        | 181.4256      | 1.271(0.8674-1.8623)   |
| NODULE, PULMONARY, NOS                                           | 40                                      | 358.1911   | 1087                                       | 448.6777      | 0.7983(0.5819-1.0953)  |
| NODULE, PULMONARY, SOLITARY                                      | 2                                       | 16.4043    | 96                                         | 35.3675       | 0.4638(0.1141-1.8851)  |
| NODULE, RHEUMATOID                                               | 2                                       | 13.9332    | 49                                         | 11.907        | 1.1702(0.2832-4.8351)  |
| NODULE, SALZMANN (EYE)                                           | 1                                       | 11.2573    | 20                                         | 12.7388       | 0.8837(0.118-6.6181)   |
| NODULE, SINGER'S                                                 | 0                                       | 0          | 2                                          | 0.4853        | 0(0-Inf)               |
| NODULE, SUBCUTANEOUS                                             | 5                                       | 34.7893    | 250                                        | 62.9283       | 0.5528(0.2278-1.3418)  |
| NODULE, THYROID, SEE ALSO GOITER, NODULAR                        | 26                                      | 189.659    | 555                                        | 154.8202      | 1.225(0.8255-1.818)    |
| NODULE, VOCAL CORD                                               | 2                                       | 13.9126    | 45                                         | 11.1067       | 1.2526(0.3024-5.1891)  |
| NOISES, VASCULAR-HEAD                                            | 1                                       | 7.1844     | 12                                         | 3.4373        | 2.0901(0.2686-16.263)  |

| Description                              | No. of Positive Cases with Disease Code | Case Rate* | No. of Positive Controls with Disease Code | Control Rate* | Relative Risk (95%CI)  |
|------------------------------------------|-----------------------------------------|------------|--------------------------------------------|---------------|------------------------|
| NOMA, NOS                                | 0                                       | 0          | 1                                          | 0.4751        | 0(0-Inf)               |
| NON - COMPLIANT PATIENT                  | 4                                       | 42.6723    | 86                                         | 47.2614       | 0.9029(0.3305-2.4666)  |
| NONFUNCTIONING, GALLBLADDER              | 0                                       | 0          | 7                                          | 1.7377        | 0(0-Inf)               |
| NONFUNCTIONING, KIDNEY                   | 4                                       | 51.265     | 20                                         | 14.2144       | 3.6066(1.2237-10.6293) |
| NONFUNCTIONING, TOOTH                    | 2                                       | 14.8581    | 67                                         | 15.896        | 0.9347(0.2282-3.8284)  |
| NON-HEALING STUMP                        | 2                                       | 19.2535    | 7                                          | 3.3055        | 5.8247(1.1898-28.5154) |
| NONRESTORABLE TEETH                      | 78                                      | 613.0247   | 1969                                       | 616.0621      | 0.9951(0.7931-1.2485)  |
| NONROTATION, SMALL INTESTINE             | 0                                       | 0          | 1                                          | 0.4048        | 0(0-Inf)               |
| NONUNION STERNUM (POSTOP)                | 0                                       | 0          | 8                                          | 4.1077        | 0(0-Inf)               |
| NON-USE SEAT BELT                        | 0                                       | 0          | 1                                          | 0.234         | 0(0-Inf)               |
| NONVISUALIZATION GALLBLADDER             | 0                                       | 0          | 2                                          | 0.5069        | 0(0-Inf)               |
| NONVITAL TEETH                           | 7                                       | 49.4702    | 187                                        | 45.6556       | 1.0836(0.5084-2.3096)  |
| NORMAL, SPEECH AND LANGUAGE              | 2                                       | 13.8555    | 20                                         | 5.0956        | 2.7191(0.6292-11.7504) |
| NORMAL, CONTROL PATIENT                  | 0                                       | 0          | 14                                         | 3.9985        | 0(0-Inf)               |
| NORMOTENSIVE                             | 34                                      | 248.0355   | 548                                        | 136.0963      | 1.8225(1.2868-2.5812)  |
| NOTALGIA PARESTHETICA                    | 0                                       | 0          | 16                                         | 5.3396        | 0(0-Inf)               |
| NUCLEAR MEDICINE, ADRENAL                | 0                                       | 0          | 6                                          | 1.7749        | 0(0-Inf)               |
| NUCLEAR MEDICINE, BONE MARROW            | 2                                       | 20.7931    | 24                                         | 12.8367       | 1.6198(0.3804-6.8968)  |
| NUCLEAR MEDICINE, BONE--NUBO             | 122                                     | 1003.913   | 2644                                       | 863.6718      | 1.1624(0.9689-1.3945)  |
| NUCLEAR MEDICINE, BRAIN                  | 4                                       | 27.9286    | 82                                         | 20.1098       | 1.3888(0.5071-3.8036)  |
| NUCLEAR MEDICINE, CISTERNOGRAPHY (BRAIN) | 0                                       | 0          | 4                                          | 1.112         | 0(0-Inf)               |
| NUCLEAR MEDICINE, ESOPHAGUS              | 0                                       | 0          | 13                                         | 3.1745        | 0(0-Inf)               |
| NUCLEAR MEDICINE, GALLIUM SCAN           | 1                                       | 6.9921     | 44                                         | 11.743        | 0.5954(0.0817-4.3371)  |
| NUCLEAR MEDICINE, HEART--NUHT            | 59                                      | 437.8545   | 1728                                       | 489.1592      | 0.8951(0.6901-1.161)   |
| NUCLEAR MEDICINE, JOINT                  | 1                                       | 7.2885     | 20                                         | 4.7434        | 1.5366(0.2046-11.542)  |
| NUCLEAR MEDICINE, KIDNEY--NUKD           | 13                                      | 91.7026    | 244                                        | 64.5642       | 1.4203(0.8113-2.4866)  |
| NUCLEAR MEDICINE, LIVER-NULI             | 8                                       | 72.0015    | 141                                        | 35.982        | 2.001(0.9785-4.0922)   |
| NUCLEAR MEDICINE, LUNG--NULU             | 23                                      | 166.2933   | 703                                        | 197.569       | 0.8417(0.555-1.2764)   |
| NUCLEAR MEDICINE, MECKEL'S DIVERTICULUM  | 0                                       | 0          | 11                                         | 3.1085        | 0(0-Inf)               |
| NUCLEAR MEDICINE, MIBG                   | 0                                       | 0          | 2                                          | 0.7896        | 0(0-Inf)               |
| NUCLEAR MEDICINE, NOS                    | 25                                      | 185.336    | 560                                        | 166.935       | 1.1102(0.7428-1.6594)  |
| NUCLEAR MEDICINE, PARATHYROID            | 2                                       | 17.0147    | 16                                         | 6.2486        | 2.723(0.6191-11.9758)  |
| NUCLEAR MEDICINE, RP30A                  | 5                                       | 39.2637    | 88                                         | 30.1645       | 1.3017(0.527-3.2152)   |
| NUCLEAR MEDICINE, SESTAMIBI (HEART #)    | 54                                      | 443.9608   | 1700                                       | 622.758       | 0.7129(0.5434-0.9353)  |
| NUCLEAR MEDICINE, SKELETAL               | 0                                       | 0          | 7                                          | 1.6158        | 0(0-Inf)               |
| NUCLEAR MEDICINE, SPLEEN                 | 0                                       | 0          | 8                                          | 3.2662        | 0(0-Inf)               |
| NUCLEAR MEDICINE, THALLIUM (HEART #)     | 39                                      | 329.7948   | 1190                                       | 455.6128      | 0.7238(0.5258-0.9965)  |
| NUCLEAR MEDICINE, THYROID I-131          | 1                                       | 7.243      | 53                                         | 15.2475       | 0.475(0.0655-3.4457)   |
| NUCLEAR MEDICINE, THYROID--NUTH          | 16                                      | 142.3042   | 381                                        | 91.9735       | 1.5472(0.9366-2.5561)  |
| NUCLEAR MEDICINE, TOTAL BODY             | 1                                       | 6.937      | 7                                          | 1.7608        | 3.9397(0.4756-32.6357) |

| Description                                                           | No. of Positive Cases with Disease Code | Case Rate* | No. of Positive Controls with Disease Code | Control Rate* | Relative Risk (95%CI)  |
|-----------------------------------------------------------------------|-----------------------------------------|------------|--------------------------------------------|---------------|------------------------|
| NUCLEAR MEDICINE, TUMOR SCAN WITH GALLIUM                             | 0                                       | 0          | 1                                          | 0.234         | 0(0-Inf)               |
| NUMBNESS                                                              | 25                                      | 188.626    | 873                                        | 274.096       | 0.6882(0.462-1.025)    |
| NURSING HOME VISIT                                                    | 20                                      | 362.4501   | 402                                        | 472.655       | 0.7668(0.4891-1.2023)  |
| NUTCRACKER ESOPHAGUS                                                  | 0                                       | 0          | 1                                          | 0.4048        | 0(0-Inf)               |
| NYSTAGMUS, CONGENITAL                                                 | 1                                       | 7.4018     | 8                                          | 2.0837        | 3.5523(0.4385-28.7785) |
| NYSTAGMUS, DOWNBEAT                                                   | 0                                       | 0          | 5                                          | 2.7041        | 0(0-Inf)               |
| NYSTAGMUS, DUE TO VESTIBULAR DISEASE                                  | 0                                       | 0          | 1                                          | 0.4048        | 0(0-Inf)               |
| NYSTAGMUS, LATENT                                                     | 0                                       | 0          | 1                                          | 0.2729        | 0(0-Inf)               |
| NYSTAGMUS, NEC                                                        | 1                                       | 7.1951     | 6                                          | 1.7208        | 4.1813(0.4927-35.4842) |
| NYSTAGMUS, NOS                                                        | 2                                       | 14.3711    | 28                                         | 8.1008        | 1.774(0.4197-7.4991)   |
| NYSTAGMUS, POSITIONAL                                                 | 0                                       | 0          | 1                                          | 0.8877        | 0(0-Inf)               |
| NYSTAGMUS, RETRACTILE                                                 | 0                                       | 0          | 1                                          | 0.4049        | 0(0-Inf)               |
| OBESITY, ENDOGENOUS                                                   | 0                                       | 0          | 4                                          | 1.262         | 0(0-Inf)               |
| OBESITY, MASSIVE                                                      | 2                                       | 15.8667    | 83                                         | 19.1895       | 0.8268(0.2028-3.3717)  |
| OBESITY, MORBID                                                       | 4                                       | 28.3517    | 222                                        | 61.1736       | 0.4635(0.1722-1.2474)  |
| OBESITY, NOS--OBE                                                     | 189                                     | 2019.204   | 5731                                       | 1831.5286     | 1.1025(0.9534-1.2749)  |
| OBLITERATION, APPENDIX                                                | 0                                       | 0          | 18                                         | 4.41          | 0(0-Inf)               |
| OBLITERATION, BILE DUCT, COMMON                                       | 0                                       | 0          | 1                                          | 0.3526        | 0(0-Inf)               |
| OBLITERATION, ENDOMETRIUM                                             | 0                                       | 0          | 1                                          | 0.398         | 0(0-Inf)               |
| OBLITERATION, VEIN                                                    | 1                                       | 6.8894     | 0                                          | 0             | 12238725165.471(0-Inf) |
| OBLITERATION, VESTIBULE (ORAL)                                        | 0                                       | 0          | 1                                          | 0.2354        | 0(0-Inf)               |
| OBSERVATION, FOLLOWING CRIMINAL ASSAULT                               | 0                                       | 0          | 1                                          | 0.2354        | 0(0-Inf)               |
| OBSERVATION, NO NEED FOR FURTHER CARE, CHILD GROWTH/DEVELOPMENT       | 1                                       | 7.6988     | 7                                          | 2.2819        | 3.3738(0.4072-27.9532) |
| OBSERVATION, NO NEED FOR FURTHER CARE, INGEST FB/AGENT/DRUG           | 0                                       | 0          | 4                                          | 1.0352        | 0(0-Inf)               |
| OBSERVATION, VEIN                                                     | 6                                       | 80.4996    | 141                                        | 41.2576       | 1.9511(0.8598-4.4277)  |
| OBSERVATION, WITHOUT NEED FOR FURTHER MED CARE FOR DISEASE, NEC       | 0                                       | 0          | 5                                          | 2.0352        | 0(0-Inf)               |
| OBSERVATION, WITHOUT NEED FOR FURTHER MED CARE FOR DISEASE, NOS       | 0                                       | 0          | 3                                          | 2.8232        | 0(0-Inf)               |
| OBSERVATION, WITHOUT NEED FOR FURTHER MEDICAL CARE FOLLOWING ACCIDENT | 2                                       | 15.1204    | 32                                         | 10.0992       | 1.4972(0.3565-6.2877)  |
| OBSERVATION, WITHOUT NEED FOR FURTHER MEDICAL CARE FOR NEOPLASM       | 0                                       | 0          | 2                                          | 0.4709        | 0(0-Inf)               |
| OBSTIPATION                                                           | 5                                       | 49.7385    | 118                                        | 58.8062       | 0.8458(0.3449-2.0743)  |
| OBSTRUCTION PANCREATIC (DUCT) (PAPILLARY)                             | 1                                       | 10.03      | 11                                         | 5.521         | 1.8167(0.2323-14.2051) |
| OBSTRUCTION, AIRWAY, CHRONIC PULMONARY                                | 1                                       | 6.9179     | 13                                         | 3.4808        | 1.9874(0.2575-15.3401) |
| OBSTRUCTION, AIRWAY, NASAL                                            | 0                                       | 0          | 114                                        | 28.6685       | 0(0-Inf)               |
| OBSTRUCTION, AMPULLA OF VATER                                         | 0                                       | 0          | 1                                          | 0.8528        | 0(0-Inf)               |

| Description                                                                         | No. of Positive Cases with Disease Code | Case Rate* | No. of Positive Controls with Disease Code | Control Rate* | Relative Risk (95%CI)  |
|-------------------------------------------------------------------------------------|-----------------------------------------|------------|--------------------------------------------|---------------|------------------------|
| OBSTRUCTION, ANASTOMOSIS, SEE ALSO THE COMPLICATION, SURGICAL PROCEDURE CODES       | 2                                       | 14.3623    | 19                                         | 5.6256        | 2.553(0.5895-11.0563)  |
| OBSTRUCTION, ARTERY, EXTREMITY, SEE ALSO OCCLUSION                                  | 0                                       | 0          | 1                                          | 0.888         | 0(0-Inf)               |
| OBSTRUCTION, BILE DUCT, NOS                                                         | 1                                       | 9.0641     | 43                                         | 18.5324       | 0.4891(0.0672-3.5621)  |
| OBSTRUCTION, BLADDER NECK--OBBL                                                     | 27                                      | 306.6333   | 478                                        | 275.2295      | 1.1141(0.7555-1.643)   |
| OBSTRUCTION, BRONCHUS                                                               | 0                                       | 0          | 16                                         | 4.7603        | 0(0-Inf)               |
| OBSTRUCTION, CANALICULAR (LACRIMAL)                                                 | 0                                       | 0          | 5                                          | 1.2721        | 0(0-Inf)               |
| OBSTRUCTION, CARDIA                                                                 | 1                                       | 7.8905     | 7                                          | 2.4122        | 3.2711(0.3957-27.0387) |
| OBSTRUCTION, CARDIAC OUTFLOW, NOS                                                   | 0                                       | 0          | 4                                          | 3.7973        | 0(0-Inf)               |
| OBSTRUCTION, CARDIAC, DUE TO BALL, VALVE PROSTHESIS (CODE ALSO STATUS HEART VALVE#) | 0                                       | 0          | 1                                          | 0.2729        | 0(0-Inf)               |
| OBSTRUCTION, COLON, SEE ALSO OBSTRUCTION, INTESTINE                                 | 3                                       | 30.1731    | 27                                         | 13.683        | 2.2052(0.6644-7.3187)  |
| OBSTRUCTION, COMMON BILE DUCT                                                       | 0                                       | 0          | 19                                         | 9.7876        | 0(0-Inf)               |
| OBSTRUCTION, CYSTIC DUCT                                                            | 1                                       | 7.1342     | 7                                          | 1.9536        | 3.6518(0.4406-30.2675) |
| OBSTRUCTION, DUODENUM                                                               | 1                                       | 9.6512     | 19                                         | 9.0062        | 1.0716(0.1426-8.0527)  |
| OBSTRUCTION, DUODENUM, DUE TO ULCER                                                 | 0                                       | 0          | 3                                          | 0.7064        | 0(0-Inf)               |
| OBSTRUCTION, EAR CANAL                                                              | 1                                       | 6.9893     | 60                                         | 16.0401       | 0.4357(0.0602-3.1523)  |
| OBSTRUCTION, EJACULATORY DUCT                                                       | 0                                       | 0          | 1                                          | 0.2729        | 0(0-Inf)               |
| OBSTRUCTION, ESOPHAGUS                                                              | 1                                       | 8.8944     | 51                                         | 21.4019       | 0.4156(0.0573-3.0145)  |
| OBSTRUCTION, EUSTACHIAN TUBE                                                        | 0                                       | 0          | 10                                         | 3.1097        | 0(0-Inf)               |
| OBSTRUCTION, EXOMPHALOS                                                             | 0                                       | 0          | 1                                          | 1.0366        | 0(0-Inf)               |
| OBSTRUCTION, FALLOPIAN TUBE                                                         | 0                                       | 0          | 2                                          | 0.7963        | 0(0-Inf)               |
| OBSTRUCTION, GALLBLADDER                                                            | 0                                       | 0          | 2                                          | 0.7896        | 0(0-Inf)               |
| OBSTRUCTION, GASTRIC                                                                | 0                                       | 0          | 16                                         | 4.3487        | 0(0-Inf)               |
| OBSTRUCTION, GASTRIC OUTLET, SEE ALSO OBSTRUCTION, PYLORUS                          | 2                                       | 18.1728    | 20                                         | 8.6739        | 2.0951(0.4856-9.0395)  |
| OBSTRUCTION, GLOTTIS                                                                | 0                                       | 0          | 2                                          | 0.432         | 0(0-Inf)               |
| OBSTRUCTION, HEPATIC DUCT                                                           | 0                                       | 0          | 7                                          | 1.8166        | 0(0-Inf)               |
| OBSTRUCTION, ILEOCECAL VALVE                                                        | 0                                       | 0          | 2                                          | 0.5908        | 0(0-Inf)               |
| OBSTRUCTION, ILEUM                                                                  | 1                                       | 7.1531     | 12                                         | 2.7496        | 2.6015(0.3335-20.2932) |
| OBSTRUCTION, INTESTINE, ADYNAMIC (SEE ALSO ILEUS)                                   | 0                                       | 0          | 2                                          | 1.1624        | 0(0-Inf)               |
| OBSTRUCTION, INTESTINE, DUE TO ADHESIONS                                            | 1                                       | 7.1192     | 19                                         | 5.2151        | 1.3651(0.1811-10.2874) |
| OBSTRUCTION, INTESTINE, DUE TO IMPACTION                                            | 0                                       | 0          | 1                                          | 0.2354        | 0(0-Inf)               |
| OBSTRUCTION, INTESTINE, LARGE                                                       | 3                                       | 29.691     | 27                                         | 13.2894       | 2.2342(0.6732-7.4152)  |
| OBSTRUCTION, INTESTINE, NEC                                                         | 0                                       | 0          | 5                                          | 1.116         | 0(0-Inf)               |
| OBSTRUCTION, INTESTINE, NOS                                                         | 3                                       | 25.9082    | 60                                         | 23.9461       | 1.0819(0.3381-3.4626)  |
| OBSTRUCTION, INTESTINE, SMALL                                                       | 14                                      | 126.3859   | 466                                        | 199.4152      | 0.6338(0.372-1.0796)   |
| OBSTRUCTION, INTESTINE, WITH HERNIA, SEE ALSO HERNIA, INCARCERATED                  | 0                                       | 0          | 2                                          | 0.7896        | 0(0-Inf)               |
| OBSTRUCTION, JEJUNUM                                                                | 0                                       | 0          | 3                                          | 1.5415        | 0(0-Inf)               |



| Description                                                 | No. of Positive Cases with Disease Code | Case Rate* | No. of Positive Controls with Disease Code | Control Rate* | Relative Risk (95%CI)  |
|-------------------------------------------------------------|-----------------------------------------|------------|--------------------------------------------|---------------|------------------------|
| OBSTRUCTION, KIDNEY                                         | 1                                       | 9.7084     | 33                                         | 15.7481       | 0.6165(0.084-4.5225)   |
| OBSTRUCTION, LACRIMAL                                       | 0                                       | 0          | 10                                         | 2.4479        | 0(0-Inf)               |
| OBSTRUCTION, LARYNX                                         | 0                                       | 0          | 3                                          | 0.741         | 0(0-Inf)               |
| OBSTRUCTION, LIVER, NOS                                     | 1                                       | 10.3256    | 3                                          | 1.5741        | 6.5595(0.6669-64.5146) |
| OBSTRUCTION, LUNG, AIRWAY, CHRONIC                          | 0                                       | 0          | 1                                          | 0.8878        | 0(0-Inf)               |
| OBSTRUCTION, LUNG, EMPHYSEMATOUS                            | 0                                       | 0          | 1                                          | 2.4912        | 0(0-Inf)               |
| OBSTRUCTION, LYMPHATIC                                      | 0                                       | 0          | 3                                          | 0.9165        | 0(0-Inf)               |
| OBSTRUCTION, NASOLACRIMAL DUCT                              | 8                                       | 65.6368    | 146                                        | 52.8951       | 1.2409(0.6074-2.535)   |
| OBSTRUCTION, NASOPHARYNX                                    | 0                                       | 0          | 8                                          | 1.9344        | 0(0-Inf)               |
| OBSTRUCTION, NOSE OR SINUS                                  | 7                                       | 48.9435    | 271                                        | 69.6926       | 0.7023(0.3312-1.4893)  |
| OBSTRUCTION, OUTLET FORAMEN                                 | 0                                       | 0          | 1                                          | 0.2354        | 0(0-Inf)               |
| OBSTRUCTION, PAPANICOLAOU                                   | 0                                       | 0          | 1                                          | 0.8877        | 0(0-Inf)               |
| OBSTRUCTION, PAROTID GLAND                                  | 0                                       | 0          | 22                                         | 5.2755        | 0(0-Inf)               |
| OBSTRUCTION, PHARYNX                                        | 0                                       | 0          | 4                                          | 1.8414        | 0(0-Inf)               |
| OBSTRUCTION, PROSTATIC                                      | 50                                      | 1177.828   | 820                                        | 957.834       | 1.2297(0.9237-1.637)   |
| OBSTRUCTION, PYLORIC                                        | 0                                       | 0          | 16                                         | 3.9564        | 0(0-Inf)               |
| OBSTRUCTION, RECTOSIGMOID (SEE ALSO OBSTRUCTION, INTESTINE) | 0                                       | 0          | 5                                          | 2.3427        | 0(0-Inf)               |
| OBSTRUCTION, RECTUM                                         | 0                                       | 0          | 5                                          | 1.7337        | 0(0-Inf)               |
| OBSTRUCTION, RESPIRATORY                                    | 0                                       | 0          | 5                                          | 1.9392        | 0(0-Inf)               |
| OBSTRUCTION, SALIVARY DUCT                                  | 0                                       | 0          | 20                                         | 5.0815        | 0(0-Inf)               |
| OBSTRUCTION, SIGMOID (SEE ALSO OBSTRUCTION, INTESTINE)      | 2                                       | 18.7113    | 58                                         | 26.4641       | 0.707(0.1722-2.9039)   |
| OBSTRUCTION, STENSON'S DUCT                                 | 0                                       | 0          | 4                                          | 0.9521        | 0(0-Inf)               |
| OBSTRUCTION, STOMACH, NOS                                   | 1                                       | 7.1964     | 9                                          | 2.5439        | 2.8289(0.3526-22.6952) |
| OBSTRUCTION, SUBMANDIBULAR GLAND                            | 0                                       | 0          | 5                                          | 1.5655        | 0(0-Inf)               |
| OBSTRUCTION, SUBMANDIBULAR GLAND, WITH CALCULUS             | 0                                       | 0          | 2                                          | 0.4708        | 0(0-Inf)               |
| OBSTRUCTION, SUBMAXILLARY GLAND                             | 0                                       | 0          | 1                                          | 0.2354        | 0(0-Inf)               |
| OBSTRUCTION, TEAR DUCT                                      | 1                                       | 8.6314     | 8                                          | 3.2113        | 2.6878(0.3319-21.7668) |
| OBSTRUCTION, THYROID (WITH GOITER)                          | 0                                       | 0          | 1                                          | 0.398         | 0(0-Inf)               |
| OBSTRUCTION, TRACHEA                                        | 1                                       | 7.0185     | 9                                          | 2.4078        | 2.9149(0.3634-23.3785) |
| OBSTRUCTION, UPPER AIRWAY                                   | 2                                       | 14.0043    | 33                                         | 8.798         | 1.5918(0.3796-6.6754)  |
| OBSTRUCTION, URETER, DUE TO CALCULUS                        | 3                                       | 21.1065    | 34                                         | 9.2277        | 2.2873(0.6975-7.5004)  |
| OBSTRUCTION, URETER, NOS                                    | 2                                       | 17.5878    | 100                                        | 41.2186       | 0.4267(0.1051-1.7329)  |
| OBSTRUCTION, URETEROPELVIC                                  | 2                                       | 14.3755    | 55                                         | 15.5906       | 0.9221(0.224-3.7955)   |
| OBSTRUCTION, URETEROPELVIC, CONGENITAL                      | 0                                       | 0          | 2                                          | 0.4854        | 0(0-Inf)               |
| OBSTRUCTION, URETEROVESICAL                                 | 1                                       | 6.9779     | 9                                          | 2.3945        | 2.9142(0.3636-23.3537) |
| OBSTRUCTION, URETHRA, NOS, SEE ALSO STRICTURE, URETHRA      | 2                                       | 21.2046    | 23                                         | 12.6216       | 1.68(0.3941-7.1615)    |
| OBSTRUCTION, URINARY                                        | 22                                      | 268.6441   | 412                                        | 272.2352      | 0.9868(0.6421-1.5167)  |
| OBSTRUCTION, VAGINA                                         | 0                                       | 0          | 1                                          | 0.8528        | 0(0-Inf)               |
| OBSTRUCTION, VASCULAR GRAFT OR SHUNT                        | 0                                       | 0          | 10                                         | 4.0134        | 0(0-Inf)               |

| Description                                                     | No. of Positive Cases with Disease Code | Case Rate* | No. of Positive Controls with Disease Code | Control Rate* | Relative Risk (95%CI)   |
|-----------------------------------------------------------------|-----------------------------------------|------------|--------------------------------------------|---------------|-------------------------|
| OBSTRUCTION, VENOUS                                             | 0                                       | 0          | 9                                          | 3.0561        | 0(0-Inf)                |
| OBSTRUCTION, VENTRICULAR OUTFLOW, LEFT                          | 1                                       | 8.8062     | 25                                         | 10.307        | 0.8544(0.1152-6.3393)   |
| OBSTRUCTION, VESICAL NECK                                       | 1                                       | 6.8736     | 2                                          | 0.5521        | 12.4491(1.096-141.4072) |
| OBSTRUCTION, WHARTON'S DUCT, WITH CALCULUS                      | 0                                       | 0          | 2                                          | 0.5458        | 0(0-Inf)                |
| OBTUNDENT                                                       | 0                                       | 0          | 9                                          | 9.3825        | 0(0-Inf)                |
| OCCIPITALIZATION-SEE ALSO ANKYLOSIS                             | 0                                       | 0          | 1                                          | 0.4048        | 0(0-Inf)                |
| OCCLUSION, AORTA, ABDOMINAL                                     | 1                                       | 7.9995     | 7                                          | 2.4529        | 3.2612(0.3942-26.9793)  |
| OCCLUSION, AORTOILIAC                                           | 2                                       | 13.9072    | 52                                         | 13.4186       | 1.0364(0.2514-4.2728)   |
| OCCLUSION, ARTERY, EXTREMITY, NOS                               | 0                                       | 0          | 4                                          | 1.6246        | 0(0-Inf)                |
| OCCLUSION, ARTERY, EYE                                          | 0                                       | 0          | 1                                          | 0.888         | 0(0-Inf)                |
| OCCLUSION, ARTERY, LOWER EXTREMITY                              | 4                                       | 42.8917    | 120                                        | 66.0841       | 0.649(0.2393-1.7606)    |
| OCCLUSION, ARTERY, NEC                                          | 1                                       | 9.8456     | 7                                          | 3.4348        | 2.8664(0.3483-23.5913)  |
| OCCLUSION, ARTERY, NOS                                          | 0                                       | 0          | 6                                          | 1.4922        | 0(0-Inf)                |
| OCCLUSION, ARTERY, UPPER EXTREMITY                              | 0                                       | 0          | 14                                         | 5.1281        | 0(0-Inf)                |
| OCCLUSION, AUDITORY ARTERY                                      | 0                                       | 0          | 1                                          | 0.405         | 0(0-Inf)                |
| OCCLUSION, AUDITORY CANAL                                       | 0                                       | 0          | 4                                          | 1.3221        | 0(0-Inf)                |
| OCCLUSION, AXILLARY ARTERY                                      | 0                                       | 0          | 2                                          | 0.4853        | 0(0-Inf)                |
| OCCLUSION, BASILAR ARTERY                                       | 0                                       | 0          | 10                                         | 4.1966        | 0(0-Inf)                |
| OCCLUSION, BRACHIAL ARTERY                                      | 0                                       | 0          | 3                                          | 0.961         | 0(0-Inf)                |
| OCCLUSION, BRAIN, SEE ALSO THROMBOSIS, BRAIN                    | 0                                       | 0          | 3                                          | 1.1479        | 0(0-Inf)                |
| OCCLUSION, CAROTID ARTERY                                       | 7                                       | 64.19      | 243                                        | 107.083       | 0.5994(0.2824-1.2723)   |
| OCCLUSION, CAROTID ARTERY, BILATERAL                            | 2                                       | 17.6666    | 58                                         | 24.1252       | 0.7323(0.1783-3.007)    |
| OCCLUSION, CAROTID ARTERY, OLD OR LATE EFFECT                   | 0                                       | 0          | 12                                         | 4.9057        | 0(0-Inf)                |
| OCCLUSION, CELIAC ARTERY                                        | 0                                       | 0          | 3                                          | 0.7021        | 0(0-Inf)                |
| OCCLUSION, CEREBELLAR, NOS                                      | 0                                       | 0          | 1                                          | 0.4048        | 0(0-Inf)                |
| OCCLUSION, CEREBRAL ARTERY                                      | 1                                       | 9.8148     | 5                                          | 2.4308        | 4.0376(0.463-35.2091)   |
| OCCLUSION, CEREBRAL ARTERY, OLD OR HEALED                       | 0                                       | 0          | 1                                          | 0.234         | 0(0-Inf)                |
| OCCLUSION, CHOROIDAL, OLD OR LATE EFFECT                        | 0                                       | 0          | 1                                          | 0.3526        | 0(0-Inf)                |
| OCCLUSION, CORONARY ARTERY, ACUTE                               | 2                                       | 14.3283    | 90                                         | 26.3809       | 0.5431(0.1335-2.2098)   |
| OCCLUSION, CORONARY, OLD OR HEALED SEE ALSO INFARCT, MYOCARDIAL | 0                                       | 0          | 10                                         | 4.5535        | 0(0-Inf)                |
| OCCLUSION, DIGITAL ARTERY, FOOT                                 | 0                                       | 0          | 4                                          | 0.9158        | 0(0-Inf)                |
| OCCLUSION, DIGITAL ARTERY, HAND                                 | 0                                       | 0          | 9                                          | 2.7991        | 0(0-Inf)                |
| OCCLUSION, FALLOPIAN TUBE                                       | 0                                       | 0          | 1                                          | 0.8274        | 0(0-Inf)                |
| OCCLUSION, FEMORAL ARTERY                                       | 4                                       | 36.094     | 86                                         | 36.788        | 0.9811(0.359-2.6812)    |
| OCCLUSION, FEMORAL ARTERY, POST-CATHETERIZATION                 | 1                                       | 10.1103    | 0                                          | 0             | 14209803557.6569(0-Inf) |
| OCCLUSION, GINGIVA, TRAUMATIC                                   | 0                                       | 0          | 1                                          | 0.398         | 0(0-Inf)                |
| OCCLUSION, GRAFT, AORTIC                                        | 1                                       | 7.1044     | 6                                          | 1.6975        | 4.1853(0.4939-35.4675)  |
| OCCLUSION, GRAFT, CORONARY ARTERY                               | 1                                       | 7.7901     | 48                                         | 16.5611       | 0.4704(0.0648-3.4166)   |
| OCCLUSION, GRAFT, FEMORAL ARTERY                                | 2                                       | 16.5612    | 18                                         | 6.6993        | 2.4721(0.568-10.7584)   |

| Description                                                         | No. of Positive Cases with Disease Code | Case Rate* | No. of Positive Controls with Disease Code | Control Rate* | Relative Risk (95%CI)    |
|---------------------------------------------------------------------|-----------------------------------------|------------|--------------------------------------------|---------------|--------------------------|
| OCCLUSION, GRAFT, ILEOFEMORAL ARTERY                                | 0                                       | 0          | 1                                          | 0.234         | 0(0-Inf)                 |
| OCCLUSION, GRAFT, SAPHENOUS VEIN BYPASS FOR CORONARY ARTERY DISEASE | 0                                       | 0          | 23                                         | 12.1409       | 0(0-Inf)                 |
| OCCLUSION, ILEOFEMORAL ARTERY                                       | 0                                       | 0          | 9                                          | 2.3763        | 0(0-Inf)                 |
| OCCLUSION, ILIAC ARTERY                                             | 1                                       | 7.475      | 26                                         | 8.1857        | 0.9132(0.1233-6.765)     |
| OCCLUSION, INNOMINATE ARTERY                                        | 0                                       | 0          | 4                                          | 1.1697        | 0(0-Inf)                 |
| OCCLUSION, LABYRINTHINE ARTERY                                      | 0                                       | 0          | 1                                          | 0.4049        | 0(0-Inf)                 |
| OCCLUSION, LACRIMAL                                                 | 0                                       | 0          | 1                                          | 0.8882        | 0(0-Inf)                 |
| OCCLUSION, LUNG                                                     | 0                                       | 0          | 3                                          | 1.1478        | 0(0-Inf)                 |
| OCCLUSION, MAMMARY DUCT                                             | 0                                       | 0          | 3                                          | 0.6536        | 0(0-Inf)                 |
| OCCLUSION, MESENTERIC ARTERY                                        | 0                                       | 0          | 12                                         | 5.8989        | 0(0-Inf)                 |
| OCCLUSION, MIDDLE CEREBRAL ARTERY                                   | 0                                       | 0          | 3                                          | 3.8494        | 0(0-Inf)                 |
| OCCLUSION, NOSE, NOS                                                | 0                                       | 0          | 1                                          | 0.2354        | 0(0-Inf)                 |
| OCCLUSION, PERIODONTAL, NOS (TRAUMATIC)                             | 1                                       | 8.0758     | 2                                          | 0.7121        | 11.3409(0.9853-130.5372) |
| OCCLUSION, PERONEAL ARTERY                                          | 0                                       | 0          | 2                                          | 1.0783        | 0(0-Inf)                 |
| OCCLUSION, PONTINE, NOS                                             | 0                                       | 0          | 1                                          | 0.4049        | 0(0-Inf)                 |
| OCCLUSION, POPLITEAL ARTERY                                         | 3                                       | 28.0702    | 55                                         | 24.9613       | 1.1245(0.3506-3.6067)    |
| OCCLUSION, PROSTHESIS, AORTIC                                       | 0                                       | 0          | 1                                          | 0.2729        | 0(0-Inf)                 |
| OCCLUSION, PUNCTA                                                   | 1                                       | 7.8984     | 64                                         | 22.0067       | 0.3589(0.0497-2.5931)    |
| OCCLUSION, PUPIL                                                    | 0                                       | 0          | 1                                          | 0.234         | 0(0-Inf)                 |
| OCCLUSION, RADIAL ARTERY                                            | 0                                       | 0          | 1                                          | 0.2354        | 0(0-Inf)                 |
| OCCLUSION, RENAL ARTERY                                             | 0                                       | 0          | 8                                          | 3.0884        | 0(0-Inf)                 |
| OCCLUSION, RETINAL ARTERY                                           | 0                                       | 0          | 42                                         | 20.5597       | 0(0-Inf)                 |
| OCCLUSION, RETINAL ARTERY BRANCH                                    | 3                                       | 29.6481    | 45                                         | 22.0281       | 1.3459(0.4166-4.3487)    |
| OCCLUSION, RETINAL VEIN                                             | 5                                       | 48.7587    | 62                                         | 29.8698       | 1.6324(0.6537-4.0765)    |
| OCCLUSION, RETINAL VEIN, BRANCH                                     | 11                                      | 108.8686   | 205                                        | 99.5957       | 1.0931(0.5949-2.0085)    |
| OCCLUSION, RETINAL VEIN, CENTRAL                                    | 4                                       | 44.4176    | 111                                        | 64.9605       | 0.6838(0.2517-1.8576)    |
| OCCLUSION, SPINAL ARTERY                                            | 1                                       | 7.7854     | 0                                          | 0             | 17360840868.8181(0-Inf)  |
| OCCLUSION, SPLENIC VEIN                                             | 0                                       | 0          | 1                                          | 0.3526        | 0(0-Inf)                 |
| OCCLUSION, SUBCLAVIAN ARTERY                                        | 1                                       | 8.2569     | 23                                         | 8.5273        | 0.9683(0.13-7.2121)      |
| OCCLUSION, TEETH                                                    | 3                                       | 22.7088    | 34                                         | 7.8496        | 2.893(0.8812-9.4975)     |
| OCCLUSION, TIBIAL ARTERY                                            | 2                                       | 23.2389    | 40                                         | 24.7313       | 0.9397(0.2264-3.9007)    |
| OCCLUSION, ULNAR ARTERY                                             | 0                                       | 0          | 7                                          | 3.0563        | 0(0-Inf)                 |
| OCCLUSION, VASCULAR                                                 | 0                                       | 0          | 2                                          | 0.5069        | 0(0-Inf)                 |
| OCCLUSION, VASCULAR, LOWER EXTREMITY                                | 0                                       | 0          | 10                                         | 3.6675        | 0(0-Inf)                 |
| OCCLUSION, VASCULAR, NEC                                            | 0                                       | 0          | 2                                          | 0.6775        | 0(0-Inf)                 |
| OCCLUSION, VASCULAR, UPPER EXTREMITY                                | 0                                       | 0          | 5                                          | 1.265         | 0(0-Inf)                 |
| OCCLUSION, VEIN/VESSEL, NEC, CODE ALSO THROMBOSIS BY SITE           | 0                                       | 0          | 5                                          | 1.6798        | 0(0-Inf)                 |
| OCCLUSION, VENA CAVA, INFERIOR                                      | 0                                       | 0          | 2                                          | 0.4853        | 0(0-Inf)                 |

| Description                                                  | No. of Positive Cases with Disease Code | Case Rate* | No. of Positive Controls with Disease Code | Control Rate* | Relative Risk (95%CI)    |
|--------------------------------------------------------------|-----------------------------------------|------------|--------------------------------------------|---------------|--------------------------|
| OCCLUSION, VENA CAVA, SUPERIOR                               | 0                                       | 0          | 1                                          | 0.8877        | 0(0-Inf)                 |
| OCCLUSION, VENTRICLE, BRAIN                                  | 0                                       | 0          | 1                                          | 0.4751        | 0(0-Inf)                 |
| OCCLUSION, VERTEBRAL ARTERY                                  | 2                                       | 16.4761    | 25                                         | 9.2702        | 1.7773(0.4181-7.5548)    |
| OCCLUSION, VERTEBRAL ARTERY, OLD OR LATE EFFECT              | 0                                       | 0          | 1                                          | 0.234         | 0(0-Inf)                 |
| OCCLUSION, VULVA                                             | 0                                       | 0          | 1                                          | 1.9077        | 0(0-Inf)                 |
| ODONTALGIA                                                   | 7                                       | 66.7724    | 191                                        | 49.1815       | 1.3577(0.6372-2.8929)    |
| ODYNOPHAGIA (SEE ALSO DYSPHAGIA)                             | 5                                       | 38.7591    | 75                                         | 24.7905       | 1.5635(0.6296-3.8827)    |
| OILY SKIN                                                    | 0                                       | 0          | 3                                          | 0.8018        | 0(0-Inf)                 |
| OLEOTHORAX                                                   | 0                                       | 0          | 1                                          | 0.2354        | 0(0-Inf)                 |
| OLIGO-ASTROCYTOMA-CODE ALSO NEOPLASM MALIGNANT BY SITE       | 0                                       | 0          | 2                                          | 0.7051        | 0(0-Inf)                 |
| OLIGODENDROGLIOMA-CODE ALSO NEOPLASM MALIGNANT BY SITE       | 0                                       | 0          | 3                                          | 0.7798        | 0(0-Inf)                 |
| OLIGOMENORRHEA, NOS                                          | 0                                       | 0          | 26                                         | 21.301        | 0(0-Inf)                 |
| OLIGOMENORRHEA, UNDETERMINED ETIOLOGY                        | 0                                       | 0          | 1                                          | 0.398         | 0(0-Inf)                 |
| OLIGO-OVULATION                                              | 0                                       | 0          | 1                                          | 0.234         | 0(0-Inf)                 |
| OLIGOSPERMIA                                                 | 1                                       | 20.2612    | 3                                          | 1.5029        | 13.4813(1.3737-132.2981) |
| OLIGURIA                                                     | 3                                       | 40.5148    | 14                                         | 11.1208       | 3.6432(1.0382-12.7839)   |
| OMPHALITIS, NOS                                              | 0                                       | 0          | 17                                         | 3.9056        | 0(0-Inf)                 |
| ONCOCYTOMA, MALIGNANT, CODE ALSO NEOPLASM, MALIGNANT BY SITE | 0                                       | 0          | 6                                          | 2.5212        | 0(0-Inf)                 |
| ONCOCYTOMA, NOS, CODE ALSO NEOPLASM, BENIGN BY SITE          | 2                                       | 22.8956    | 23                                         | 13.9044       | 1.6466(0.3864-7.0181)    |
| ONCOCYTOMA, SALIVARY GLAND                                   | 0                                       | 0          | 1                                          | 0.8528        | 0(0-Inf)                 |
| ONYCHAUXIS                                                   | 2                                       | 18.4555    | 30                                         | 13.4583       | 1.3713(0.3258-5.7721)    |
| ONYCHIA                                                      | 0                                       | 0          | 4                                          | 1.0352        | 0(0-Inf)                 |
| ONYCHITIS                                                    | 0                                       | 0          | 1                                          | 2.4858        | 0(0-Inf)                 |
| ONYCHOCRYPTOSIS (INGROWN NAIL)                               | 49                                      | 416.6984   | 957                                        | 361.8375      | 1.1516(0.8634-1.5361)    |
| ONYCHODYSTROPHY, NOS                                         | 4                                       | 27.8254    | 56                                         | 13.9503       | 1.9946(0.7192-5.5316)    |
| ONYCHOGRYPOSIS, NOS                                          | 5                                       | 35.0061    | 206                                        | 49.4588       | 0.7078(0.2909-1.722)     |
| ONYCHOLYSIS (LOOSENING OF NAIL)                              | 12                                      | 92.1615    | 219                                        | 70.3952       | 1.3092(0.7306-2.3462)    |
| ONYCHOMYCOSIS, HAND                                          | 2                                       | 14.6214    | 28                                         | 8.407         | 1.7392(0.4115-7.3511)    |
| ONYCHOMYCOSIS, NOS                                           | 108                                     | 1031.687   | 2476                                       | 1069.6916     | 0.9645(0.7951-1.1699)    |
| ONYCHOPHAGY (ONYCHOPHAGIA), ADULT                            | 0                                       | 0          | 1                                          | 0.888         | 0(0-Inf)                 |
| ONYCHOPTOSIS                                                 | 0                                       | 0          | 4                                          | 0.9708        | 0(0-Inf)                 |
| ONYCHORRHEXIS, NOS                                           | 1                                       | 7.2607     | 7                                          | 1.5599        | 4.6546(0.5597-38.7101)   |
| ONYCHOSCHIZIA                                                | 1                                       | 7.0236     | 30                                         | 7.8869        | 0.8905(0.1207-6.5706)    |
| ONYCHOSIS                                                    | 0                                       | 0          | 6                                          | 5.6553        | 0(0-Inf)                 |
| OOPHORITIS, CHRONIC                                          | 0                                       | 0          | 2                                          | 0.7962        | 0(0-Inf)                 |
| OOPHORITIS, CHRONIC, CYSTIC                                  | 0                                       | 0          | 1                                          | 0.398         | 0(0-Inf)                 |
| OOPHORITIS, NOS                                              | 0                                       | 0          | 1                                          | 0.8277        | 0(0-Inf)                 |

| Description                                          | No. of Positive Cases with Disease Code | Case Rate* | No. of Positive Controls with Disease Code | Control Rate* | Relative Risk (95%CI)  |
|------------------------------------------------------|-----------------------------------------|------------|--------------------------------------------|---------------|------------------------|
| OPACITY, ANTRUM (SINUS)                              | 1                                       | 7.5269     | 11                                         | 2.7477        | 2.7393(0.3495-21.4694) |
| OPACITY, CORNEA CONGENITAL NEC                       | 0                                       | 0          | 1                                          | 0.8271        | 0(0-Inf)               |
| OPACITY, CORNEA, PERIPHERAL                          | 0                                       | 0          | 4                                          | 1.0402        | 0(0-Inf)               |
| OPACITY, CORNEAL                                     | 3                                       | 23.0218    | 59                                         | 19.2424       | 1.1964(0.3735-3.8327)  |
| OPACITY, FOLLOWING CATARACT SURGERY                  | 11                                      | 126.5045   | 246                                        | 153.5183      | 0.824(0.4498-1.5097)   |
| OPACITY, LENS                                        | 9                                       | 74.2278    | 137                                        | 50.3581       | 1.474(0.7486-2.9023)   |
| OPACITY, SINUS, SEE ALSO SINUSITIS                   | 0                                       | 0          | 4                                          | 1.1697        | 0(0-Inf)               |
| OPACITY, VITREOUS                                    | 0                                       | 0          | 18                                         | 4.5943        | 0(0-Inf)               |
| OPENBITE                                             | 0                                       | 0          | 1                                          | 0.234         | 0(0-Inf)               |
| OPERCULUM, EYE                                       | 1                                       | 7.0581     | 22                                         | 6.0335        | 1.1698(0.1566-8.7378)  |
| OPERCULUM, TOOTH                                     | 0                                       | 0          | 1                                          | 0.8273        | 0(0-Inf)               |
| OPHTHALMODYNIA PERIODIC FUGAX                        | 2                                       | 14.7507    | 16                                         | 4.7815        | 3.085(0.7008-13.5809)  |
| OPHTHALMOPATHY, ENDOCRINE                            | 0                                       | 0          | 8                                          | 1.7795        | 0(0-Inf)               |
| OPHTHALMOPATHY, GRAVES'                              | 1                                       | 7.2137     | 72                                         | 16.3152       | 0.4421(0.0613-3.1891)  |
| OPHTHALMOPATHY, NOS                                  | 0                                       | 0          | 6                                          | 1.2962        | 0(0-Inf)               |
| OPHTHALMOPLEGIA, EXTERNAL                            | 0                                       | 0          | 1                                          | 0.4048        | 0(0-Inf)               |
| OPHTHALMOPLEGIA, INTERNUCLEAR                        | 0                                       | 0          | 11                                         | 3.3196        | 0(0-Inf)               |
| OPHTHALMOPLEGIA, INTRANUCLEAR                        | 0                                       | 0          | 4                                          | 0.9157        | 0(0-Inf)               |
| OPHTHALMOPLEGIA, NOS                                 | 1                                       | 8.9251     | 4                                          | 1.6896        | 5.2824(0.5772-48.3409) |
| OPHTHALMOPLEGIA, PAINFUL                             | 0                                       | 0          | 1                                          | 0.234         | 0(0-Inf)               |
| OPHTHALMOPLEGIA, PERIODICA FUGAX                     | 0                                       | 0          | 2                                          | 0.432         | 0(0-Inf)               |
| OPHTHALMOPLEGIA, PROGRESSIVE                         | 0                                       | 0          | 1                                          | 0.4048        | 0(0-Inf)               |
| OPHTHALMOPLEGIA, TRAUMATIC                           | 0                                       | 0          | 1                                          | 1.0363        | 0(0-Inf)               |
| ORAL CONTRACEPTION                                   | 0                                       | 0          | 5                                          | 1.1301        | 0(0-Inf)               |
| ORCHITIS, MUMPS                                      | 0                                       | 0          | 4                                          | 1.0588        | 0(0-Inf)               |
| ORCHITIS, NOS                                        | 1                                       | 14.4071    | 43                                         | 26.9284       | 0.535(0.0735-3.8945)   |
| ORF                                                  | 0                                       | 0          | 1                                          | 0.2729        | 0(0-Inf)               |
| OROPHARYNGITIS                                       | 1                                       | 6.9225     | 4                                          | 1.04          | 6.6559(0.7237-61.2193) |
| ORTHOPHORIA                                          | 0                                       | 0          | 1                                          | 0.4048        | 0(0-Inf)               |
| ORTHOPNEA                                            | 0                                       | 0          | 1                                          | 0.2354        | 0(0-Inf)               |
| ORTHOPNEA, CAUSE SPECIFIED                           | 0                                       | 0          | 3                                          | 2.8231        | 0(0-Inf)               |
| ORTHOPNEA, NOS                                       | 1                                       | 11.3945    | 39                                         | 23.9072       | 0.4766(0.0653-3.4784)  |
| ORTHOSTASIS                                          | 8                                       | 110.7482   | 143                                        | 114.1247      | 0.9704(0.4753-1.9811)  |
| ORTHOSTATISM                                         | 17                                      | 190.5029   | 206                                        | 119.3546      | 1.5961(0.9715-2.6222)  |
| OS ODONTOIDEUM                                       | 0                                       | 0          | 1                                          | 0.2729        | 0(0-Inf)               |
| OSCILLOPSIA                                          | 1                                       | 6.9335     | 8                                          | 2.0686        | 3.3518(0.4123-27.2479) |
| OSSIFICATION, BONE                                   | 0                                       | 0          | 10                                         | 2.5295        | 0(0-Inf)               |
| OSSIFICATION, HETEROTOPIC BONE IN SCAR               | 0                                       | 0          | 6                                          | 3.9702        | 0(0-Inf)               |
| OSSIFICATION, MENINGES, SPINAL                       | 0                                       | 0          | 1                                          | 0.398         | 0(0-Inf)               |
| OSSIFICATION, POSTERIOR LONGITUDINAL LIGAMENT (OPLL) | 0                                       | 0          | 1                                          | 0.3526        | 0(0-Inf)               |

| Description                                                        | No. of Positive Cases with Disease Code | Case Rate* | No. of Positive Controls with Disease Code | Control Rate* | Relative Risk (95%CI)  |
|--------------------------------------------------------------------|-----------------------------------------|------------|--------------------------------------------|---------------|------------------------|
| OSTEITIS, ALVEOLAR                                                 | 0                                       | 0          | 12                                         | 3.1064        | 0(0-Inf)               |
| OSTEITIS, CONDENSANS, SITE NEC                                     | 0                                       | 0          | 2                                          | 0.4709        | 0(0-Inf)               |
| OSTEITIS, DEFORMANS, LOWER EXTREMITY                               | 0                                       | 0          | 25                                         | 12.6438       | 0(0-Inf)               |
| OSTEITIS, DEFORMANS, NOS                                           | 0                                       | 0          | 3                                          | 1.2107        | 0(0-Inf)               |
| OSTEITIS, DEFORMANS, SITE NEC                                      | 1                                       | 10.6044    | 18                                         | 9.7854        | 1.0837(0.1439-8.1637)  |
| OSTEITIS, DEFORMANS, UPPER EXTREMITY                               | 0                                       | 0          | 3                                          | 0.9612        | 0(0-Inf)               |
| OSTEITIS, NOS, SEE ALSO OSTEOMYELITIS                              | 1                                       | 6.9032     | 3                                          | 0.731         | 9.4432(0.9403-94.8331) |
| OSTEITIS, PUBIS                                                    | 2                                       | 21.4266    | 18                                         | 4.4827        | 4.7798(1.0962-20.8428) |
| OSTEOARTHRITIS, DEGENERATIVE, SEE ALSO DISEASE, DEGENERATIVE JOINT | 1                                       | 8.0592     | 7                                          | 2.4973        | 3.2272(0.3895-26.7371) |
| OSTEOARTHRITIS, NOS, SEE ALSO DISEASE, DEGENERATIVE JOINT--OA      | 60                                      | 537.7255   | 1764                                       | 709.6948      | 0.7577(0.5854-0.9806)  |
| OSTEOARTHRITIS, SENESCENT                                          | 0                                       | 0          | 1                                          | 0.2355        | 0(0-Inf)               |
| OSTEOARTHRITIS, SPINE, SEE ALSO DISEASE, DEGENERATIVE, SPINE       | 7                                       | 59.7899    | 87                                         | 33.8438       | 1.7666(0.8148-3.8305)  |
| OSTEOARTHROPATHY, HYPERTROPHIC, PULMONARY, NOS                     | 0                                       | 0          | 1                                          | 0.3526        | 0(0-Inf)               |
| OSTEOARTHROSIS-SEE ALSO OSTEOARTHRITIS                             | 0                                       | 0          | 17                                         | 9.076         | 0(0-Inf)               |
| OSTEOCARTILAGINOUS BODY, JOINT, NOS                                | 1                                       | 8.4473     | 10                                         | 2.6502        | 3.1875(0.4031-25.2026) |
| OSTEOCARTILAGINOUS BODY, KNEE                                      | 0                                       | 0          | 20                                         | 5.3178        | 0(0-Inf)               |
| OSTEOCHONDROITIS, DISSECANS, LOWER EXTREMITY                       | 1                                       | 10.4335    | 22                                         | 6.7618        | 1.543(0.2069-11.5097)  |
| OSTEOCHONDROITIS, DISSECANS, NOS                                   | 0                                       | 0          | 5                                          | 1.2832        | 0(0-Inf)               |
| OSTEOCHONDROITIS, DISSECANS, UPPER EXTREMITY                       | 0                                       | 0          | 1                                          | 0.234         | 0(0-Inf)               |
| OSTEOCHONDROITIS, NOS, SEE ALSO OSTEOCHONDROSIS                    | 0                                       | 0          | 3                                          | 0.7798        | 0(0-Inf)               |
| OSTEOCHONDRODYSTROPHY, NOS                                         | 0                                       | 0          | 1                                          | 0.3528        | 0(0-Inf)               |
| OSTEOCHONDROMA, MULTIPLE                                           | 0                                       | 0          | 1                                          | 0.3526        | 0(0-Inf)               |
| OSTEOCHONDROMA, NOS (CODE ALSO NEO BENIGN BY SITE IF STATED)       | 0                                       | 0          | 8                                          | 3.6465        | 0(0-Inf)               |
| OSTEOCHONDROMATOSIS, NEC                                           | 0                                       | 0          | 3                                          | 0.7798        | 0(0-Inf)               |
| OSTEOCHONDROMATOSIS, SYNOVIAL                                      | 0                                       | 0          | 2                                          | 0.432         | 0(0-Inf)               |
| OSTEOCHONDROSIS, ADULT, LOWER EXTREMITY                            | 0                                       | 0          | 1                                          | 0.2354        | 0(0-Inf)               |
| OSTEOCHONDROSIS, ADULT, UPPER EXTREMITY                            | 0                                       | 0          | 5                                          | 1.5262        | 0(0-Inf)               |
| OSTEOCHONDROSIS, CAPITELLUM HUMERI                                 | 0                                       | 0          | 1                                          | 0.4751        | 0(0-Inf)               |
| OSTEOCHONDROSIS, KIENBOCK'S                                        | 0                                       | 0          | 2                                          | 0.4708        | 0(0-Inf)               |
| OSTEOCHONDROSIS, PATELLA                                           | 0                                       | 0          | 1                                          | 0.2729        | 0(0-Inf)               |
| OSTEODYSTROPHY, NOS                                                | 2                                       | 18.3902    | 5                                          | 2.2057        | 8.3375(1.5829-43.9158) |
| OSTEODYSTROPHY, RENAL                                              | 0                                       | 0          | 15                                         | 10.1256       | 0(0-Inf)               |
| OSTEOGENESIS IMPERFECTA                                            | 0                                       | 0          | 1                                          | 0.2354        | 0(0-Inf)               |
| OSTEOLYSIS, NOS, SEE ALSO DECALCIFICATION                          | 0                                       | 0          | 30                                         | 12.8789       | 0(0-Inf)               |
| OSTEOMA, CUTIS                                                     | 0                                       | 0          | 5                                          | 1.7684        | 0(0-Inf)               |
| OSTEOMA, HEAD AND NECK                                             | 0                                       | 0          | 22                                         | 5.5917        | 0(0-Inf)               |

| Description                                                                                         | No. of Positive Cases with Disease Code | Case Rate* | No. of Positive Controls with Disease Code | Control Rate* | Relative Risk (95%CI)    |
|-----------------------------------------------------------------------------------------------------|-----------------------------------------|------------|--------------------------------------------|---------------|--------------------------|
| OSTEOMA, LOWER EXTREMITY                                                                            | 0                                       | 0          | 1                                          | 0.4751        | 0(0-Inf)                 |
| OSTEOMA, NASAL SINUS                                                                                | 0                                       | 0          | 2                                          | 0.9502        | 0(0-Inf)                 |
| OSTEOMA, NOS, CODE ALSO NEO BENIGN BY SITE STATED                                                   | 0                                       | 0          | 5                                          | 2.3436        | 0(0-Inf)                 |
| OSTEOMA, OSTEOID, HEAD OR NECK                                                                      | 0                                       | 0          | 1                                          | 0.3526        | 0(0-Inf)                 |
| OSTEOMA, OSTEOID, LOWER EXTREMITY                                                                   | 0                                       | 0          | 1                                          | 0.3527        | 0(0-Inf)                 |
| OSTEOMA, TONGUE                                                                                     | 0                                       | 0          | 1                                          | 0.234         | 0(0-Inf)                 |
| OSTEOMALACIA, DUE TO VITAMIN D DEFICIENCY                                                           | 0                                       | 0          | 2                                          | 0.5709        | 0(0-Inf)                 |
| OSTEOMALACIA, NOS                                                                                   | 1                                       | 7.1419     | 30                                         | 8.3244        | 0.8579(0.1164-6.326)     |
| OSTEOMYELITIS, ACUTE OR SUBACUTE, LOWER EXTREMITY                                                   | 0                                       | 0          | 6                                          | 2.4051        | 0(0-Inf)                 |
| OSTEOMYELITIS, ACUTE OR SUBACUTE, UPPER EXTREMITY                                                   | 0                                       | 0          | 2                                          | 0.7898        | 0(0-Inf)                 |
| OSTEOMYELITIS, CHRONIC, LOWER EXTREMITY                                                             | 1                                       | 8.7752     | 16                                         | 6.605         | 1.3286(0.175-10.0879)    |
| OSTEOMYELITIS, CHRONIC, NOS                                                                         | 0                                       | 0          | 6                                          | 2.0359        | 0(0-Inf)                 |
| OSTEOMYELITIS, CHRONIC, SITE NEC                                                                    | 0                                       | 0          | 2                                          | 0.6309        | 0(0-Inf)                 |
| OSTEOMYELITIS, CHRONIC, UPPER EXTREMITY                                                             | 0                                       | 0          | 2                                          | 1.0795        | 0(0-Inf)                 |
| OSTEOMYELITIS, JAW (ACUTE OR CHRONIC)                                                               | 0                                       | 0          | 10                                         | 2.9326        | 0(0-Inf)                 |
| OSTEOMYELITIS, NOS                                                                                  | 2                                       | 19.4929    | 25                                         | 12.0359       | 1.6196(0.3814-6.8777)    |
| OSTEOMYELITIS, NOS, LOWER EXTREMITY                                                                 | 5                                       | 44.047     | 76                                         | 31.3366       | 1.4056(0.5668-3.4858)    |
| OSTEOMYELITIS, NOS, SITE NEC                                                                        | 1                                       | 8.0232     | 19                                         | 6.7026        | 1.197(0.1591-9.0063)     |
| OSTEOMYELITIS, NOS, UPPER EXTREMITY                                                                 | 1                                       | 8.2569     | 9                                          | 3.3691        | 2.4508(0.3066-19.5874)   |
| OSTEOMYELITIS, OLD                                                                                  | 0                                       | 0          | 7                                          | 2.3181        | 0(0-Inf)                 |
| OSTEONECROSIS                                                                                       | 3                                       | 25.5292    | 58                                         | 22.4362       | 1.1379(0.3551-3.6459)    |
| OSTEOPENIA-SEE ALSO OSTEOPOROSIS                                                                    | 58                                      | 458.0277   | 1742                                       | 574.5794      | 0.7972(0.6132-1.0362)    |
| OSTEOPETROSIS                                                                                       | 1                                       | 6.9137     | 2                                          | 0.4936        | 14.0069(1.2022-163.1918) |
| OSTEOPHYTE (SEE ALSO EXOSTOSIS)                                                                     | 0                                       | 0          | 7                                          | 3.3491        | 0(0-Inf)                 |
| OSTEOPOROSIS, DISUSE, CODE ALSO OSTEOPOROSIS BY SITE IF STATED                                      | 0                                       | 0          | 1                                          | 0.4048        | 0(0-Inf)                 |
| OSTEOPOROSIS, IDIOPATHIC, CODE ALSO OSTEOPOROSIS BY SITE IF STATED                                  | 1                                       | 7.0926     | 19                                         | 5.5705        | 1.2733(0.1694-9.5691)    |
| OSTEOPOROSIS, LOWER EXTREMITIES                                                                     | 6                                       | 45.2728    | 97                                         | 30.4048       | 1.489(0.6502-3.4098)     |
| OSTEOPOROSIS, NOS--OST                                                                              | 153                                     | 1701.131   | 3013                                       | 1407.7363     | 1.2084(1.0267-1.4222)    |
| OSTEOPOROSIS, POST-MENOPAUSAL, CODE ALSO OSTEOPOROSIS BY SITE IF STATED                             | 4                                       | 56.258     | 208                                        | 110.4465      | 0.5094(0.189-1.3725)     |
| OSTEOPOROSIS, POST-TRAUMA, CODE ALSO OSTEOPOROSIS BY SITE IF STATED                                 | 0                                       | 0          | 2                                          | 0.5908        | 0(0-Inf)                 |
| OSTEOPOROSIS, SPINE--OSTS                                                                           | 64                                      | 631.9422   | 1458                                       | 684.0794      | 0.9238(0.7187-1.1873)    |
| OSTEOPOROSIS, STEROID-INDUCED, CODE ALSO OSTEOPOROSIS BY SITE IF STATED ( CODE ALSO EFFECT, ADVERSE | 4                                       | 29.8195    | 61                                         | 18.6905       | 1.5954(0.5774-4.4083)    |
| OSTEOPOROSIS, UPPER EXTREMITIES                                                                     | 0                                       | 0          | 10                                         | 3.1324        | 0(0-Inf)                 |
| OSTEOSARCOMA, CHONDROBLASTIC, CODE ALSO NEOPLASM MALIGNANT BY SITE                                  | 0                                       | 0          | 1                                          | 0.2354        | 0(0-Inf)                 |

| Description                               | No. of Positive Cases with Disease Code | Case Rate* | No. of Positive Controls with Disease Code | Control Rate* | Relative Risk (95%CI)    |
|-------------------------------------------|-----------------------------------------|------------|--------------------------------------------|---------------|--------------------------|
| OSTEOSCLEROSIS, NOS, ACQUIRED             | 0                                       | 0          | 1                                          | 0.8271        | 0(0-Inf)                 |
| OSTEOSCLEROSIS, NOS, CONGENITAL           | 0                                       | 0          | 2                                          | 0.5069        | 0(0-Inf)                 |
| OSTEOSIS, CUTIS                           | 0                                       | 0          | 5                                          | 1.1945        | 0(0-Inf)                 |
| OTALGIA                                   | 12                                      | 84.0597    | 477                                        | 122.0657      | 0.6886(0.3878-1.2228)    |
| OTHER LIFE CIRCUMSTANCE ISSUES            | 0                                       | 0          | 18                                         | 7.9084        | 0(0-Inf)                 |
| OTITIS, ACUTE                             | 1                                       | 11.2778    | 12                                         | 3.4172        | 3.3003(0.424-25.6864)    |
| OTITIS, ADHESIVE (MUCOUS)                 | 0                                       | 0          | 2                                          | 1.1972        | 0(0-Inf)                 |
| OTITIS, CHRONIC                           | 1                                       | 7.4545     | 8                                          | 1.9468        | 3.8291(0.4708-31.1421)   |
| OTITIS, CHRONIC, SEROUS                   | 0                                       | 0          | 19                                         | 4.8235        | 0(0-Inf)                 |
| OTITIS, EXTERNAL, ACUTE                   | 4                                       | 32.162     | 54                                         | 12.8825       | 2.4966(0.8987-6.9352)    |
| OTITIS, EXTERNAL, CHRONIC                 | 3                                       | 20.8172    | 90                                         | 22.5979       | 0.9212(0.2907-2.9195)    |
| OTITIS, EXTERNAL, DIFFUSE                 | 0                                       | 0          | 1                                          | 0.405         | 0(0-Inf)                 |
| OTITIS, EXTERNAL, MALIGNANT               | 0                                       | 0          | 7                                          | 1.8163        | 0(0-Inf)                 |
| OTITIS, EXTERNAL, NOS                     | 55                                      | 402.8175   | 1596                                       | 411.3776      | 0.9792(0.7478-1.2821)    |
| OTITIS, INTERNAL, SEE ALSO LABYRINTHITIS  | 1                                       | 8.1706     | 2                                          | 0.4728        | 17.283(1.4927-200.1044)  |
| OTITIS, MEDIA, ACUTE WITH EFFUSION        | 0                                       | 0          | 11                                         | 3.7775        | 0(0-Inf)                 |
| OTITIS, MEDIA, ACUTE, PURULENT            | 0                                       | 0          | 1                                          | 2.4857        | 0(0-Inf)                 |
| OTITIS, MEDIA, ACUTE, RECURRENT           | 0                                       | 0          | 2                                          | 0.4853        | 0(0-Inf)                 |
| OTITIS, MEDIA, ACUTE, SECRETORY           | 0                                       | 0          | 21                                         | 5.6829        | 0(0-Inf)                 |
| OTITIS, MEDIA, ACUTE, SEROUS--OMS         | 32                                      | 242.9975   | 914                                        | 220.4442      | 1.1023(0.774-1.5698)     |
| OTITIS, MEDIA, ACUTE, SUPPURATIVE         | 1                                       | 15.6012    | 7                                          | 2.3463        | 6.6494(0.8048-54.939)    |
| OTITIS, MEDIA, ACUTE--OMA                 | 6                                       | 48.005     | 273                                        | 65.2564       | 0.7356(0.3271-1.6544)    |
| OTITIS, MEDIA, CATARRHAL                  | 0                                       | 0          | 1                                          | 0.2355        | 0(0-Inf)                 |
| OTITIS, MEDIA, CHRONIC, ACTIVE            | 1                                       | 7.6143     | 18                                         | 4.3769        | 1.7397(0.2303-13.1418)   |
| OTITIS, MEDIA, CHRONIC, INACTIVE          | 0                                       | 0          | 23                                         | 5.695         | 0(0-Inf)                 |
| OTITIS, MEDIA, CHRONIC, MUCOUS (ADHESIVE) | 0                                       | 0          | 2                                          | 1.1617        | 0(0-Inf)                 |
| OTITIS, MEDIA, CHRONIC, NOS,--OMC         | 5                                       | 35.3572    | 124                                        | 30.2978       | 1.167(0.476-2.8612)      |
| OTITIS, MEDIA, CHRONIC, SECRETORY         | 0                                       | 0          | 11                                         | 3.7132        | 0(0-Inf)                 |
| OTITIS, MEDIA, CHRONIC, SEROUS            | 3                                       | 21.7271    | 131                                        | 38.1803       | 0.5691(0.1808-1.791)     |
| OTITIS, MEDIA, CHRONIC, SUPPURATIVE       | 1                                       | 8.756      | 8                                          | 3.2762        | 2.6726(0.3298-21.6598)   |
| OTITIS, MEDIA, CHRONIC, WITH EFFUSION     | 0                                       | 0          | 5                                          | 1.4862        | 0(0-Inf)                 |
| OTITIS, MEDIA, NOS--OM                    | 41                                      | 315.1052   | 1801                                       | 448.2345      | 0.703(0.5155-0.9586)     |
| OTITIS, MEDIA, RECURRENT                  | 0                                       | 0          | 18                                         | 7.2227        | 0(0-Inf)                 |
| OTITIS, MEDIA, SUBACUTE                   | 0                                       | 0          | 9                                          | 2.1073        | 0(0-Inf)                 |
| OTITIS, MEDIA, SUPPURATIVE                | 3                                       | 27.7797    | 29                                         | 7.4135        | 3.7472(1.1314-12.4103)   |
| OTITIS, NOS                               | 7                                       | 49.4357    | 177                                        | 42.3049       | 1.1686(0.5477-2.4934)    |
| OTITIS, SECRETORY                         | 0                                       | 0          | 3                                          | 1.0183        | 0(0-Inf)                 |
| OTITIS, SEROUS                            | 23                                      | 182.6878   | 581                                        | 139.1747      | 1.3127(0.8641-1.9939)    |
| OTOMYCOSIS                                | 1                                       | 10.4676    | 3                                          | 0.9015        | 11.6115(1.1727-114.9689) |
| OTORRHAGIA                                | 0                                       | 0          | 1                                          | 2.4867        | 0(0-Inf)                 |



| Description                                                                  | No. of Positive Cases with Disease Code | Case Rate* | No. of Positive Controls with Disease Code | Control Rate* | Relative Risk (95%CI)  |
|------------------------------------------------------------------------------|-----------------------------------------|------------|--------------------------------------------|---------------|------------------------|
| OTORRHEA, CEREBROSPINAL FLUID                                                | 0                                       | 0          | 2                                          | 0.5709        | 0(0-Inf)               |
| OTORRHEA, NOS                                                                | 1                                       | 7.9077     | 36                                         | 12.4276       | 0.6363(0.0869-4.6593)  |
| OTOSCLEROSIS, COCHLEAR                                                       | 2                                       | 18.3156    | 27                                         | 6.573         | 2.7865(0.6569-11.8202) |
| OTOSCLEROSIS, NOS                                                            | 5                                       | 42.0705    | 174                                        | 42.4893       | 0.9901(0.4061-2.4141)  |
| OTOTOXICITY-CODE ALSO EFFECT ADVERSE AGENT IF STATED                         | 0                                       | 0          | 2                                          | 0.8097        | 0(0-Inf)               |
| OVERACTIVE, INFERIOR OBLIQUE MUSCLE, CONGENITAL                              | 0                                       | 0          | 1                                          | 0.2729        | 0(0-Inf)               |
| OVERACTIVE, INFERIOR OBLIQUE MUSCLE, NOS                                     | 1                                       | 8.6573     | 6                                          | 1.4397        | 6.0131(0.7069-51.1463) |
| OVERBITE                                                                     | 0                                       | 0          | 4                                          | 1.1697        | 0(0-Inf)               |
| OVER-COUGH                                                                   | 0                                       | 0          | 3                                          | 0.6985        | 0(0-Inf)               |
| OVERDOSE DRUG, INTENTIONAL, CODE ALSO EFFECT ADVERSE DRUG IF STATED          | 0                                       | 0          | 3                                          | 0.6536        | 0(0-Inf)               |
| OVERDOSE DRUG, NOS, CODE ALSO EFFECT ADVERSE DRUG SPECIFIED                  | 1                                       | 7.4965     | 51                                         | 15.827        | 0.4737(0.0653-3.4382)  |
| OVEREXERTION DUE TO PHYSICAL EXERCISE/ACTIVITY                               | 0                                       | 0          | 66                                         | 20.5404       | 0(0-Inf)               |
| OVERGROWTH, BACTERIAL                                                        | 0                                       | 0          | 13                                         | 4.3254        | 0(0-Inf)               |
| OVERGROWTH, BONE, NOS (SEE ALSO HYPEROSTOSIS)                                | 0                                       | 0          | 1                                          | 0.234         | 0(0-Inf)               |
| OVERGROWTH, NAIL                                                             | 0                                       | 0          | 5                                          | 4.7342        | 0(0-Inf)               |
| OVERLAPPING TOE                                                              | 4                                       | 28.8437    | 26                                         | 7.3631        | 3.9173(1.3516-11.3538) |
| OVERLOAD, HEPATIC IRON                                                       | 0                                       | 0          | 3                                          | 0.7885        | 0(0-Inf)               |
| OVERLOAD, IRON (STORAGE)                                                     | 1                                       | 9.1271     | 13                                         | 5.7014        | 1.6009(0.2078-12.3336) |
| OVERLOAD, WATER (VOLUME)                                                     | 5                                       | 64.037     | 128                                        | 91.8201       | 0.6974(0.285-1.7069)   |
| OVER-TREATMENT / OVERMEDICATION DRUG CODE ALSO EFFECT ADVERSE DRUG SPECIFIED | 12                                      | 91.7249    | 276                                        | 88.3093       | 1.0387(0.5816-1.8549)  |
| OVERWEAR OF CONTACTS                                                         | 1                                       | 17.5451    | 28                                         | 9.9519        | 1.763(0.2387-13.0199)  |
| OVERWEIGHT                                                                   | 24                                      | 169.1785   | 1207                                       | 318.2918      | 0.5315(0.3546-0.7967)  |
| OXALURIA                                                                     | 0                                       | 0          | 1                                          | 0.827         | 0(0-Inf)               |
| OXYGEN, DEPENDENT                                                            | 8                                       | 98.4061    | 75                                         | 51.1686       | 1.9232(0.9247-3.9999)  |
| OXYGEN, THERAPY                                                              | 7                                       | 76.4932    | 82                                         | 47.1006       | 1.624(0.7482-3.5253)   |
| OZENA                                                                        | 0                                       | 0          | 3                                          | 0.9166        | 0(0-Inf)               |
| PACEMAKER, ADJUSTMENT                                                        | 0                                       | 0          | 1                                          | 0.3526        | 0(0-Inf)               |
| PACEMAKER, DEPENDENT                                                         | 5                                       | 69.4215    | 220                                        | 175.08        | 0.3965(0.1633-0.963)   |
| PACEMAKER, REMOVAL                                                           | 0                                       | 0          | 1                                          | 2.4857        | 0(0-Inf)               |
| PACHYDERMIA, LARYNX                                                          | 0                                       | 0          | 1                                          | 0.234         | 0(0-Inf)               |
| PACHYONYCHIA, NOS                                                            | 0                                       | 0          | 2                                          | 0.4708        | 0(0-Inf)               |
| PAIN, POSTOPERATIVE, CODE ALSO BY SITE IF STATED                             | 8                                       | 68.4039    | 176                                        | 68.8355       | 0.9937(0.4883-2.0225)  |
| PAIN, ABDOMINAL WALL                                                         | 12                                      | 84.0246    | 451                                        | 114.5837      | 0.7333(0.4128-1.3026)  |
| PAIN, ABDOMINAL, FUNCTIONAL                                                  | 1                                       | 8.5662     | 13                                         | 5.1652        | 1.6584(0.2147-12.8114) |
| PAIN, ABDOMINAL--ABDP                                                        | 167                                     | 1373.34    | 4966                                       | 1633.5233     | 0.8407(0.7203-0.9813)  |
| PAIN, ADNEXAL                                                                | 0                                       | 0          | 11                                         | 4.7562        | 0(0-Inf)               |
| PAIN, AMPUTATION STUMP, CODE ALSO PAIN BY SITE                               | 0                                       | 0          | 9                                          | 4.2059        | 0(0-Inf)               |

| Description                                              | No. of Positive Cases with Disease Code | Case Rate* | No. of Positive Controls with Disease Code | Control Rate* | Relative Risk (95%CI)  |
|----------------------------------------------------------|-----------------------------------------|------------|--------------------------------------------|---------------|------------------------|
| PAIN, ANGINOID                                           | 1                                       | 9.859      | 12                                         | 5.8745        | 1.6783(0.2163-13.0202) |
| PAIN, ANKLE                                              | 28                                      | 212.8206   | 1008                                       | 318.7266      | 0.6677(0.4583-0.9729)  |
| PAIN, ANKLE, POST-OP ARTHROPLASTY                        | 0                                       | 0          | 3                                          | 0.7461        | 0(0-Inf)               |
| PAIN, ANUS                                               | 0                                       | 0          | 79                                         | 23.0238       | 0(0-Inf)               |
| PAIN, ARM                                                | 43                                      | 320.9585   | 1185                                       | 349.8408      | 0.9174(0.6762-1.2448)  |
| PAIN, ATTACHMENT, CODE ALSO PAIN MUSCULOSKELETAL BY SITE | 0                                       | 0          | 60                                         | 18.5494       | 0(0-Inf)               |
| PAIN, AXILLA                                             | 3                                       | 22.1242    | 48                                         | 14.3562       | 1.5411(0.4773-4.9756)  |
| PAIN, BACK, ATTACHMENT                                   | 0                                       | 0          | 1                                          | 0.4751        | 0(0-Inf)               |
| PAIN, BACK, LOW--LBP                                     | 236                                     | 2126.516   | 6343                                       | 2050.3236     | 1.0372(0.9104-1.1815)  |
| PAIN, BACK, LUMBOSACRAL                                  | 3                                       | 25.2316    | 24                                         | 9.1272        | 2.7644(0.8248-9.265)   |
| PAIN, BACK, MUSCULAR--PMB                                | 15                                      | 121.5999   | 355                                        | 85.2688       | 1.4261(0.8491-2.3952)  |
| PAIN, BACK, NOS,--BACP                                   | 177                                     | 1561.122   | 4119                                       | 1459.3053     | 1.0698(0.9199-1.244)   |
| PAIN, BACK, POST-FUSION                                  | 0                                       | 0          | 44                                         | 12.4962       | 0(0-Inf)               |
| PAIN, BACK, PSYCHOGENIC                                  | 0                                       | 0          | 1                                          | 0.4048        | 0(0-Inf)               |
| PAIN, BACK, THORACIC                                     | 13                                      | 112.4005   | 437                                        | 174.4833      | 0.6442(0.3706-1.1196)  |
| PAIN, BEHAVIOR, CHRONIC--CPB                             | 20                                      | 173.2908   | 476                                        | 188.904       | 0.9173(0.5857-1.4367)  |
| PAIN, BLADDER                                            | 0                                       | 0          | 29                                         | 7.0323        | 0(0-Inf)               |
| PAIN, BODY WALL, SEE ALSO PAIN MUSCULOSKELETAL BY SITE   | 0                                       | 0          | 3                                          | 0.7062        | 0(0-Inf)               |
| PAIN, BONE, EXTREMITY                                    | 0                                       | 0          | 33                                         | 10.6152       | 0(0-Inf)               |
| PAIN, BONE, NOS                                          | 6                                       | 45.1556    | 65                                         | 20.3261       | 2.2216(0.9576-5.1539)  |
| PAIN, BREAST                                             | 12                                      | 84.1567    | 527                                        | 133.2783      | 0.6314(0.3559-1.1204)  |
| PAIN, BUTTOCK                                            | 36                                      | 288.0476   | 869                                        | 296.748       | 0.9707(0.6948-1.3561)  |
| PAIN, CENTRAL, SEE ALSO RADICULAR                        | 1                                       | 9.3263     | 5                                          | 2.2826        | 4.0858(0.4697-35.5405) |
| PAIN, CERVICAL (NECK)                                    | 14                                      | 101.1877   | 330                                        | 93.0912       | 1.087(0.6356-1.8589)   |
| PAIN, CHEST WALL--CWP                                    | 138                                     | 1110.615   | 3506                                       | 980.8226      | 1.1323(0.9547-1.343)   |
| PAIN, CHEST, NON-CARDIAC                                 | 36                                      | 286.2974   | 1049                                       | 363.6963      | 0.7872(0.5642-1.0983)  |
| PAIN, CHEST, NOS                                         | 184                                     | 1600.683   | 5143                                       | 1841.8691     | 0.8691(0.7499-1.0071)  |
| PAIN, COCCYX                                             | 3                                       | 20.8875    | 97                                         | 24.626        | 0.8482(0.268-2.6845)   |
| PAIN, COLON                                              | 0                                       | 0          | 9                                          | 2.5594        | 0(0-Inf)               |
| PAIN, COSTOVERTEBRAL ANGLE                               | 0                                       | 0          | 39                                         | 17.0805       | 0(0-Inf)               |
| PAIN, DISCOGENIC                                         | 0                                       | 0          | 17                                         | 6.9927        | 0(0-Inf)               |
| PAIN, EAR                                                | 15                                      | 106.204    | 561                                        | 147.5707      | 0.7197(0.4305-1.2032)  |
| PAIN, ELBOW                                              | 19                                      | 134.0723   | 427                                        | 109.7511      | 1.2216(0.7703-1.9373)  |
| PAIN, ELBOW, POST-OP ARTHROPLASTY                        | 0                                       | 0          | 1                                          | 0.398         | 0(0-Inf)               |
| PAIN, EPIGASTRIC                                         | 31                                      | 223.4434   | 1131                                       | 313.9362      | 0.7117(0.4978-1.0177)  |
| PAIN, ESOPHAGEAL                                         | 5                                       | 35.3908    | 41                                         | 11.0686       | 3.1974(1.2535-8.1556)  |
| PAIN, EXTREMITY, NOS                                     | 3                                       | 28.3136    | 130                                        | 59.9205       | 0.4725(0.1502-1.4866)  |
| PAIN, EYE                                                | 13                                      | 104.1357   | 355                                        | 122.6057      | 0.8494(0.4876-1.4794)  |
| PAIN, FACE                                               | 10                                      | 70.2274    | 506                                        | 129.8204      | 0.541(0.289-1.0127)    |

| Description                                | No. of Positive Cases with Disease Code | Case Rate* | No. of Positive Controls with Disease Code | Control Rate* | Relative Risk (95%CI)  |
|--------------------------------------------|-----------------------------------------|------------|--------------------------------------------|---------------|------------------------|
| PAIN, FACE, ATYPICAL                       | 8                                       | 55.9179    | 108                                        | 26.2629       | 2.1292(1.0338-4.3852)  |
| PAIN, FACIAL NERVE                         | 0                                       | 0          | 4                                          | 0.9521        | 0(0-Inf)               |
| PAIN, FINGER                               | 15                                      | 106.4955   | 507                                        | 133.6638      | 0.7967(0.4762-1.3332)  |
| PAIN, FINGER JOINT                         | 4                                       | 28.4076    | 147                                        | 34.3698       | 0.8265(0.3054-2.2371)  |
| PAIN, FINGER, POST-OP ARTHROPLASTY         | 0                                       | 0          | 3                                          | 0.6986        | 0(0-Inf)               |
| PAIN, FLANK                                | 26                                      | 187.6635   | 828                                        | 232.8759      | 0.8059(0.5449-1.1918)  |
| PAIN, FOOT                                 | 73                                      | 549.0228   | 2537                                       | 740.9542      | 0.741(0.5868-0.9356)   |
| PAIN, GAS                                  | 2                                       | 26.6384    | 17                                         | 12.7756       | 2.0851(0.4786-9.0832)  |
| PAIN, GASTRIC                              | 1                                       | 8.6278     | 27                                         | 10.8715       | 0.7936(0.1073-5.8711)  |
| PAIN, GASTROINTESTINAL, FUNCTIONAL, -GIFD  | 0                                       | 0          | 10                                         | 3.3106        | 0(0-Inf)               |
| PAIN, GENERALIZED                          | 53                                      | 582.4697   | 1022                                       | 574.8858      | 1.0132(0.7682-1.3364)  |
| PAIN, GENITAL ORGAN, FEMALE, NOS           | 2                                       | 13.8784    | 110                                        | 25.4884       | 0.5445(0.1341-2.2104)  |
| PAIN, GENITAL ORGAN, MALE, NOS             | 10                                      | 140.4568   | 295                                        | 174.6093      | 0.8044(0.4279-1.5123)  |
| PAIN, GROIN                                | 23                                      | 177.3226   | 734                                        | 243.0483      | 0.7296(0.4813-1.1059)  |
| PAIN, HAND                                 | 19                                      | 136.5876   | 699                                        | 195.0707      | 0.7002(0.4435-1.1055)  |
| PAIN, HEAD (SEE ALSO HEADACHE)             | 15                                      | 115.1735   | 367                                        | 117.4588      | 0.9805(0.5842-1.6459)  |
| PAIN, HEART                                | 0                                       | 0          | 8                                          | 2.7467        | 0(0-Inf)               |
| PAIN, HEEL                                 | 43                                      | 309.6325   | 947                                        | 239.8792      | 1.2908(0.9498-1.7542)  |
| PAIN, HIP                                  | 144                                     | 1398.965   | 2955                                       | 1229.5683     | 1.1378(0.962-1.3456)   |
| PAIN, HIP, POST-OP ARTHROPLASTY            | 4                                       | 38.4484    | 112                                        | 52.6113       | 0.7308(0.269-1.9854)   |
| PAIN, HYPOCHONDRIUM                        | 0                                       | 0          | 1                                          | 0.8877        | 0(0-Inf)               |
| PAIN, ILIAC (DONOR SITE)/ILIAC CREST       | 4                                       | 33.0157    | 52                                         | 19.1648       | 1.7227(0.6199-4.7873)  |
| PAIN, INCISIONAL, CODE ALSO BY SITE        | 1                                       | 9.2641     | 44                                         | 19.6          | 0.4727(0.0649-3.4402)  |
| PAIN, INFRA-ORBITAL                        | 0                                       | 0          | 2                                          | 0.6309        | 0(0-Inf)               |
| PAIN, INGUINAL                             | 3                                       | 21.1656    | 188                                        | 53.5053       | 0.3956(0.1263-1.2391)  |
| PAIN, INSERTIONAL (SEE ALSO TENOSYNOVITIS) | 1                                       | 7.0497     | 12                                         | 3.2237        | 2.1868(0.2807-17.0368) |
| PAIN, INTERCOSTAL                          | 0                                       | 0          | 14                                         | 4.5694        | 0(0-Inf)               |
| PAIN, INTESTINAL, GAS                      | 0                                       | 0          | 1                                          | 0.2354        | 0(0-Inf)               |
| PAIN, ISCHEMIC REST                        | 2                                       | 21.7497    | 65                                         | 36.706        | 0.5925(0.1448-2.4254)  |
| PAIN, ISCHIAL TUBEROSITY                   | 3                                       | 23.5819    | 34                                         | 11.5009       | 2.0504(0.6253-6.7237)  |
| PAIN, JAW                                  | 6                                       | 43.7309    | 265                                        | 77.0301       | 0.5677(0.2524-1.277)   |
| PAIN, JOINT, NEC                           | 12                                      | 87.0326    | 469                                        | 134.6099      | 0.6466(0.3641-1.148)   |
| PAIN, JOINT, NEC, POST-OP ARTHROPLASTY     | 0                                       | 0          | 2                                          | 0.5069        | 0(0-Inf)               |
| PAIN, KIDNEY                               | 0                                       | 0          | 2                                          | 0.4853        | 0(0-Inf)               |
| PAIN, KNEE                                 | 144                                     | 1155.971   | 4222                                       | 1394.775      | 0.8288(0.7017-0.979)   |
| PAIN, KNEE, POST-OP ARTHROPLASTY           | 7                                       | 62.8062    | 135                                        | 56.8483       | 1.1048(0.5155-2.3677)  |
| PAIN, LANCINATING                          | 0                                       | 0          | 3                                          | 0.8115        | 0(0-Inf)               |
| PAIN, LARYNX                               | 0                                       | 0          | 5                                          | 1.3007        | 0(0-Inf)               |
| PAIN, LEG--LEGP                            | 112                                     | 961.243    | 2755                                       | 982.0792      | 0.9788(0.8098-1.183)   |
| PAIN, LOIN                                 | 0                                       | 0          | 3                                          | 2.0478        | 0(0-Inf)               |

| Description                                                                                          | No. of Positive Cases with Disease Code | Case Rate* | No. of Positive Controls with Disease Code | Control Rate* | Relative Risk (95%CI)  |
|------------------------------------------------------------------------------------------------------|-----------------------------------------|------------|--------------------------------------------|---------------|------------------------|
| PAIN, LOWER EXTREMITY, NEC                                                                           | 60                                      | 503.2336   | 1450                                       | 528.8735      | 0.9515(0.7344-1.2328)  |
| PAIN, LUMBAR                                                                                         | 11                                      | 79.3905    | 425                                        | 121.4048      | 0.6539(0.359-1.1913)   |
| PAIN, LUMBOSACRAL                                                                                    | 6                                       | 50.7235    | 57                                         | 21.9613       | 2.3097(0.9903-5.3869)  |
| PAIN, MANDIBLE                                                                                       | 1                                       | 6.9462     | 57                                         | 14.455        | 0.4805(0.0663-3.4809)  |
| PAIN, MASTOID                                                                                        | 0                                       | 0          | 20                                         | 4.6866        | 0(0-Inf)               |
| PAIN, MAXILLA                                                                                        | 3                                       | 20.8591    | 75                                         | 18.8619       | 1.1059(0.3474-3.5204)  |
| PAIN, METATARSOPHALANGEAL (MTP), NOS                                                                 | 2                                       | 15.0756    | 37                                         | 11.6272       | 1.2966(0.3108-5.4098)  |
| PAIN, METATARSOPHALANGEAL JOINT                                                                      | 3                                       | 22.5694    | 28                                         | 8.8023        | 2.564(0.7734-8.501)    |
| PAIN, MOUTH                                                                                          | 3                                       | 22.3192    | 145                                        | 44.2033       | 0.5049(0.1607-1.5869)  |
| PAIN, MUSCLE ATTACHMENT (BACK), SEE ALSO MYALGIA                                                     | 0                                       | 0          | 5                                          | 1.7338        | 0(0-Inf)               |
| PAIN, MUSCULAR, SEE ALSO MYALGIA                                                                     | 4                                       | 28.2267    | 236                                        | 62.9777       | 0.4482(0.1666-1.2059)  |
| PAIN, MUSCULOSKELETAL, SEE ALSO MYALGIA FOR SITE SPECIFIED (IF NOT LISTED UNDER MYALGIA, CODE ALSO P | 18                                      | 136.9198   | 685                                        | 218.6412      | 0.6262(0.3918-1.0009)  |
| PAIN, MYOFASCIAL, CODE ALSO BY SITE IF STATED                                                        | 12                                      | 88.0531    | 504                                        | 149.4196      | 0.5893(0.3321-1.0459)  |
| PAIN, NECK, MUSCULAR--PNKM                                                                           | 4                                       | 30.2658    | 112                                        | 26.1803       | 1.1561(0.4251-3.1438)  |
| PAIN, NECK, POST-FUSION                                                                              | 0                                       | 0          | 4                                          | 0.9236        | 0(0-Inf)               |
| PAIN, NECK--PNK                                                                                      | 80                                      | 615.1465   | 2187                                       | 678.2829      | 0.9069(0.7251-1.1343)  |
| PAIN, NERVE, SEE ALSO NEURALGIA                                                                      | 0                                       | 0          | 11                                         | 2.6369        | 0(0-Inf)               |
| PAIN, NEUROMUSCULAR                                                                                  | 0                                       | 0          | 10                                         | 2.2122        | 0(0-Inf)               |
| PAIN, NEUROPATHIC, SEE ALSO NEURALGIA                                                                | 8                                       | 77.4382    | 119                                        | 56.3275       | 1.3748(0.6702-2.8203)  |
| PAIN, NOSE AND NASAL PASSAGES                                                                        | 0                                       | 0          | 39                                         | 10.5578       | 0(0-Inf)               |
| PAIN, OPHTHALMIC                                                                                     | 0                                       | 0          | 4                                          | 1.215         | 0(0-Inf)               |
| PAIN, ORBITAL REGION                                                                                 | 0                                       | 0          | 35                                         | 11.8531       | 0(0-Inf)               |
| PAIN, OVULATION                                                                                      | 0                                       | 0          | 6                                          | 3.4168        | 0(0-Inf)               |
| PAIN, PATELLAR                                                                                       | 1                                       | 6.9744     | 12                                         | 2.8216        | 2.4717(0.3169-19.2775) |
| PAIN, PATELLOFEMORAL                                                                                 | 3                                       | 20.9414    | 179                                        | 46.9718       | 0.4458(0.1422-1.3976)  |
| PAIN, PELVIC, FEMALE                                                                                 | 12                                      | 84.3598    | 428                                        | 98.8318       | 0.8536(0.4802-1.5173)  |
| PAIN, PELVIC, MALE                                                                                   | 1                                       | 10.3947    | 63                                         | 33.786        | 0.3077(0.0426-2.2213)  |
| PAIN, PENIS                                                                                          | 2                                       | 27.7319    | 33                                         | 18.9385       | 1.4643(0.3499-6.1278)  |
| PAIN, PERICARDIUM                                                                                    | 0                                       | 0          | 1                                          | 0.8877        | 0(0-Inf)               |
| PAIN, PERINEAL                                                                                       | 3                                       | 22.9647    | 86                                         | 28.3709       | 0.8094(0.2553-2.5661)  |
| PAIN, PHANTOM                                                                                        | 1                                       | 12.419     | 9                                          | 6.0917        | 2.0387(0.256-16.2323)  |
| PAIN, PHARYNX                                                                                        | 1                                       | 6.9683     | 24                                         | 5.6797        | 1.2269(0.1648-9.1359)  |
| PAIN, PLEURITIC, CHEST                                                                               | 12                                      | 86.416     | 313                                        | 88.7384       | 0.9738(0.5462-1.7362)  |
| PAIN, PREAURICULAR                                                                                   | 0                                       | 0          | 23                                         | 6.5359        | 0(0-Inf)               |
| PAIN, PRECORDIAL                                                                                     | 0                                       | 0          | 5                                          | 1.237         | 0(0-Inf)               |
| PAIN, PSYCHOGENIC / SOMATOFORM, CODE ALSO PAIN BY SITE IF STATED                                     | 1                                       | 7.3889     | 26                                         | 7.793         | 0.9481(0.1279-7.0303)  |
| PAIN, PSYCHOGENIC, CARDIOGENIC                                                                       | 0                                       | 0          | 2                                          | 0.5838        | 0(0-Inf)               |
| PAIN, PUBIC, FEMALE                                                                                  | 1                                       | 7.1736     | 15                                         | 4.1989        | 1.7085(0.2231-13.0807) |

| Description                          | No. of Positive Cases with Disease Code | Case Rate* | No. of Positive Controls with Disease Code | Control Rate* | Relative Risk (95%CI)  |
|--------------------------------------|-----------------------------------------|------------|--------------------------------------------|---------------|------------------------|
| PAIN, PUBIC, MALE                    | 0                                       | 0          | 6                                          | 2.7755        | 0(0-Inf)               |
| PAIN, RADICULAR, NOS                 | 10                                      | 75.2914    | 596                                        | 187.6756      | 0.4012(0.2146-0.7501)  |
| PAIN, RECTUM                         | 3                                       | 22.0858    | 200                                        | 60.3176       | 0.3662(0.1169-1.1465)  |
| PAIN, REFERRED/NERVE ROOT, NOS       | 0                                       | 0          | 37                                         | 10.5353       | 0(0-Inf)               |
| PAIN, RESPIRATION                    | 0                                       | 0          | 2                                          | 0.4853        | 0(0-Inf)               |
| PAIN, RETROSTERNAL                   | 0                                       | 0          | 17                                         | 5.4557        | 0(0-Inf)               |
| PAIN, RIB                            | 19                                      | 159.9173   | 414                                        | 156.1351      | 1.0242(0.6457-1.6246)  |
| PAIN, SACRAL                         | 3                                       | 29.4825    | 70                                         | 34.2537       | 0.8607(0.2702-2.7415)  |
| PAIN, SACROCOCCYGEAL                 | 0                                       | 0          | 2                                          | 1.7056        | 0(0-Inf)               |
| PAIN, SACROILIAC                     | 23                                      | 170.5123   | 368                                        | 107.9094      | 1.5801(1.0348-2.4129)  |
| PAIN, SCAPULA                        | 7                                       | 50.2148    | 202                                        | 56.6947       | 0.8857(0.416-1.8856)   |
| PAIN, SCIATIC                        | 3                                       | 20.9303    | 76                                         | 19.0261       | 1.1001(0.3457-3.5007)  |
| PAIN, SHOULDER                       | 108                                     | 895.0898   | 3409                                       | 1179.9198     | 0.7586(0.6261-0.9192)  |
| PAIN, SHOULDER, POST-OP ARTHROPLASTY | 0                                       | 0          | 11                                         | 5.0998        | 0(0-Inf)               |
| PAIN, SINUS                          | 3                                       | 20.862     | 49                                         | 11.941        | 1.7471(0.5413-5.6386)  |
| PAIN, SKIN                           | 1                                       | 7.1062     | 18                                         | 4.9521        | 1.435(0.1899-10.8445)  |
| PAIN, SPINAL (FACET), NOS            | 9                                       | 76.5202    | 84                                         | 32.409        | 2.3611(1.182-4.7162)   |
| PAIN, SPINE, THORACIC                | 4                                       | 28.1636    | 113                                        | 30.1384       | 0.9345(0.3437-2.5405)  |
| PAIN, STERNAL, NON-CARDIAC           | 0                                       | 0          | 3                                          | 1.5107        | 0(0-Inf)               |
| PAIN, STERNAL, NOS                   | 3                                       | 21.0578    | 43                                         | 11.3619       | 1.8534(0.5715-6.01)    |
| PAIN, STERNOCLAVICULAR               | 1                                       | 9.7026     | 6                                          | 2.8811        | 3.3677(0.3985-28.4595) |
| PAIN, SUBSTERNAL                     | 2                                       | 13.9267    | 86                                         | 21.0513       | 0.6616(0.1624-2.6952)  |
| PAIN, SUPRACLAVICULAR                | 1                                       | 7.9592     | 6                                          | 2.0817        | 3.8235(0.4508-32.4274) |
| PAIN, SUPRA-PUBIC                    | 5                                       | 35.661     | 166                                        | 45.8831       | 0.7772(0.3186-1.8959)  |
| PAIN, SUTURE/STITCH                  | 0                                       | 0          | 4                                          | 1.9683        | 0(0-Inf)               |
| PAIN, TEMPOROMANDIBULAR JOINT        | 13                                      | 93.7916    | 289                                        | 67.3932       | 1.3917(0.7967-2.4312)  |
| PAIN, THALAMIC (SYNDROME)            | 0                                       | 0          | 4                                          | 2.4131        | 0(0-Inf)               |
| PAIN, THIGH                          | 23                                      | 210.6022   | 473                                        | 205.8049      | 1.0233(0.6725-1.5571)  |
| PAIN, THORAX (CHEST)                 | 1                                       | 7.1247     | 50                                         | 13.9075       | 0.5123(0.0705-3.72)    |
| PAIN, THROAT                         | 4                                       | 28.7035    | 217                                        | 61.6961       | 0.4652(0.1728-1.2526)  |
| PAIN, TOE                            | 20                                      | 172.3814   | 463                                        | 183.1372      | 0.9413(0.6008-1.4746)  |
| PAIN, TOE JOINT                      | 1                                       | 7.8304     | 88                                         | 21.0473       | 0.372(0.0517-2.6759)   |
| PAIN, TOE, POST-OP ARTHROPLASTY      | 0                                       | 0          | 2                                          | 0.5709        | 0(0-Inf)               |
| PAIN, TONGUE                         | 2                                       | 14.5121    | 64                                         | 18.5075       | 0.7841(0.1913-3.2147)  |
| PAIN, TOOTH                          | 15                                      | 106.9564   | 264                                        | 70.3391       | 1.5206(0.9016-2.5644)  |
| PAIN, TRIGEMINAL                     | 1                                       | 6.9073     | 6                                          | 1.3752        | 5.0227(0.5885-42.8653) |
| PAIN, UMBILICUS                      | 0                                       | 0          | 18                                         | 5.6049        | 0(0-Inf)               |
| PAIN, UPPER EXTREMITY, NEC           | 9                                       | 64.4233    | 367                                        | 101.1554      | 0.6369(0.3283-1.2355)  |
| PAIN, URETER                         | 0                                       | 0          | 5                                          | 1.2831        | 0(0-Inf)               |
| PAIN, URINARY ORGAN, NEC             | 2                                       | 14.696     | 19                                         | 5.6754        | 2.5894(0.597-11.2306)  |

| Description                                      | No. of Positive Cases with Disease Code | Case Rate* | No. of Positive Controls with Disease Code | Control Rate* | Relative Risk (95%CI)    |
|--------------------------------------------------|-----------------------------------------|------------|--------------------------------------------|---------------|--------------------------|
| PAIN, VERTEBRA                                   | 0                                       | 0          | 6                                          | 1.7138        | 0(0-Inf)                 |
| PAIN, WRIST                                      | 23                                      | 167.7816   | 894                                        | 259.3137      | 0.647(0.4273-0.9796)     |
| PAIN, WRIST, POST-OP ARTHROPLASTY                | 0                                       | 0          | 1                                          | 0.398         | 0(0-Inf)                 |
| PAIN, XIPHOID                                    | 0                                       | 0          | 18                                         | 4.5696        | 0(0-Inf)                 |
| PAINFUL, BOWEL MOVEMENTS/DEFECATION              | 0                                       | 0          | 2                                          | 1.1971        | 0(0-Inf)                 |
| PAINFUL, COITUS, FEMALE                          | 0                                       | 0          | 1                                          | 0.234         | 0(0-Inf)                 |
| PAINFUL, COITUS, MALE                            | 0                                       | 0          | 1                                          | 0.2729        | 0(0-Inf)                 |
| PAINFUL, EJACULATION                             | 0                                       | 0          | 6                                          | 1.8978        | 0(0-Inf)                 |
| PAINFUL, ERECTION                                | 0                                       | 0          | 3                                          | 1.0579        | 0(0-Inf)                 |
| PAINFUL, FEET SYNDROME (DIETARY DEFICIENCY #)    | 0                                       | 0          | 4                                          | 1.142         | 0(0-Inf)                 |
| PAINFUL, MENSTRUATION, SEE ALSO DYSMENORRHEA     | 0                                       | 0          | 2                                          | 0.5838        | 0(0-Inf)                 |
| PAINFUL, SCAR (CODE ALSO SCAR BY SITE IF STATED) | 3                                       | 21.2669    | 80                                         | 19.2118       | 1.107(0.3483-3.5177)     |
| PAINFUL, SUTURES (WIRE)                          | 0                                       | 0          | 4                                          | 0.8642        | 0(0-Inf)                 |
| PALLOR, NOS                                      | 2                                       | 18.8779    | 24                                         | 11.287        | 1.6725(0.3925-7.1279)    |
| PALLOR, OPTIC DISC (TEMPORAL)                    | 1                                       | 7.4535     | 13                                         | 3.9992        | 1.8638(0.2411-14.4062)   |
| PALPABLE, CECUM                                  | 0                                       | 0          | 1                                          | 0.2354        | 0(0-Inf)                 |
| PALPABLE, LIVER                                  | 0                                       | 0          | 1                                          | 0.234         | 0(0-Inf)                 |
| PALPABLE, OVARY                                  | 0                                       | 0          | 4                                          | 0.9419        | 0(0-Inf)                 |
| PALPABLE, PROSTATE                               | 0                                       | 0          | 3                                          | 0.8711        | 0(0-Inf)                 |
| PALPABLE, SPLEEN                                 | 0                                       | 0          | 6                                          | 1.5989        | 0(0-Inf)                 |
| PALPABLE, UTERUS                                 | 0                                       | 0          | 1                                          | 0.2354        | 0(0-Inf)                 |
| PALPITATION                                      | 54                                      | 408.6181   | 1616                                       | 475.889       | 0.8586(0.6543-1.1269)    |
| PALSY, AXILLARY, NERVE                           | 0                                       | 0          | 2                                          | 1.7772        | 0(0-Inf)                 |
| PALSY, BELL'S NOS                                | 6                                       | 41.8598    | 200                                        | 52.2951       | 0.8005(0.3547-1.8066)    |
| PALSY, BIRTH                                     | 1                                       | 10.1174    | 0                                          | 0             | 1422877722.6242(0-Inf)   |
| PALSY, BULBAR                                    | 1                                       | 13.9936    | 1                                          | 0.8067        | 17.3457(1.0493-286.7464) |
| PALSY, CEREBRAL, ATHETOID                        | 0                                       | 0          | 1                                          | 0.8271        | 0(0-Inf)                 |
| PALSY, CEREBRAL, NOS--CP                         | 0                                       | 0          | 11                                         | 3.2488        | 0(0-Inf)                 |
| PALSY, CONGENITAL, SEE ALSO PALSY, CEREBRAL      | 0                                       | 0          | 4                                          | 1.0274        | 0(0-Inf)                 |
| PALSY, CONJUGATE GAZE                            | 0                                       | 0          | 1                                          | 0.234         | 0(0-Inf)                 |
| PALSY, CRANIAL NERVES, MULTIPLE                  | 0                                       | 0          | 1                                          | 0.2354        | 0(0-Inf)                 |
| PALSY, ERB'S, BIRTH INJURY                       | 0                                       | 0          | 1                                          | 0.4751        | 0(0-Inf)                 |
| PALSY, EXTREMITY, UPPER, NEC                     | 0                                       | 0          | 2                                          | 0.5474        | 0(0-Inf)                 |
| PALSY, FACIAL                                    | 2                                       | 14.7482    | 28                                         | 8.4794        | 1.7393(0.4115-7.3521)    |
| PALSY, FEMORAL NERVE                             | 0                                       | 0          | 2                                          | 0.8096        | 0(0-Inf)                 |
| PALSY, LARYNGEAL                                 | 0                                       | 0          | 1                                          | 0.2354        | 0(0-Inf)                 |
| PALSY, MEDIAN NERVE                              | 0                                       | 0          | 3                                          | 0.7886        | 0(0-Inf)                 |
| PALSY, NERVE, NOS (SEE ALSO PARALYSIS/PARESIS)   | 0                                       | 0          | 4                                          | 1.0917        | 0(0-Inf)                 |
| PALSY, NOS, SEE ALSO PARALYSIS/PARESIS           | 1                                       | 17.7469    | 3                                          | 3.2122        | 5.5248(0.5673-53.8065)   |

| Description                                                   | No. of Positive Cases with Disease Code | Case Rate* | No. of Positive Controls with Disease Code | Control Rate* | Relative Risk (95%CI)  |
|---------------------------------------------------------------|-----------------------------------------|------------|--------------------------------------------|---------------|------------------------|
| PALSY, PERONEAL                                               | 1                                       | 7.4315     | 32                                         | 9.8333        | 0.7557(0.1028-5.556)   |
| PALSY, RADIAL NERVE                                           | 2                                       | 13.9273    | 15                                         | 3.7745        | 3.6898(0.8334-16.3358) |
| PALSY, SERRATUS ANTERIOR                                      | 0                                       | 0          | 1                                          | 0.234         | 0(0-Inf)               |
| PALSY, SEVENTH NERVE                                          | 3                                       | 21.4887    | 18                                         | 5.0594        | 4.2473(1.2352-14.6038) |
| PALSY, SHAKING                                                | 0                                       | 0          | 1                                          | 0.2354        | 0(0-Inf)               |
| PALSY, THIRD NERVE, PARTIAL                                   | 0                                       | 0          | 6                                          | 4.0961        | 0(0-Inf)               |
| PALSY, ULNAR NERVE                                            | 1                                       | 6.9785     | 24                                         | 5.9307        | 1.1767(0.1582-8.7536)  |
| PALSY, ULNAR NERVE, TARDY, PARESIS                            | 0                                       | 0          | 13                                         | 3.4648        | 0(0-Inf)               |
| PANCREATITIS, ACUTE, ALCOHOL                                  | 0                                       | 0          | 8                                          | 2             | 0(0-Inf)               |
| PANCREATITIS, ACUTE, DRUG-INDUCED                             | 0                                       | 0          | 2                                          | 0.432         | 0(0-Inf)               |
| PANCREATITIS, ACUTE, NOS                                      | 6                                       | 44.3708    | 113                                        | 34.4846       | 1.2867(0.5644-2.9333)  |
| PANCREATITIS, ACUTE, POST-OP                                  | 0                                       | 0          | 7                                          | 1.8254        | 0(0-Inf)               |
| PANCREATITIS, ACUTE, TRAUMA                                   | 0                                       | 0          | 1                                          | 0.398         | 0(0-Inf)               |
| PANCREATITIS, CHRONIC, ALCOHOL INDUCED                        | 0                                       | 0          | 1                                          | 0.234         | 0(0-Inf)               |
| PANCREATITIS, CHRONIC, NOS                                    | 2                                       | 14.0015    | 34                                         | 9.192         | 1.5232(0.3638-6.3781)  |
| PANCREATITIS, NOS                                             | 9                                       | 76.0798    | 225                                        | 86.6021       | 0.8785(0.4504-1.7134)  |
| PANCREATITIS, RECURRENT                                       | 0                                       | 0          | 20                                         | 5.0622        | 0(0-Inf)               |
| PANCYTOPENIA                                                  | 10                                      | 100.2463   | 95                                         | 47.5139       | 2.1098(1.0959-4.0619)  |
| PANHYPOTUITARISM, NOS                                         | 0                                       | 0          | 4                                          | 0.9237        | 0(0-Inf)               |
| PANIC (NOS)                                                   | 4                                       | 28.8281    | 250                                        | 71.5104       | 0.4031(0.1499-1.0839)  |
| PANNICULITIS, NOS                                             | 2                                       | 13.9047    | 30                                         | 7.4005        | 1.8789(0.4455-7.9234)  |
| PANNICULUS                                                    | 1                                       | 7.1603     | 19                                         | 4.238         | 1.6896(0.224-12.7452)  |
| PANNUS, CORNEAL                                               | 1                                       | 7.8743     | 17                                         | 5.8377        | 1.3489(0.1781-10.2145) |
| PANNUS, NOS (EYE #)                                           | 0                                       | 0          | 7                                          | 1.9845        | 0(0-Inf)               |
| PANSINUSITIS, ACUTE                                           | 0                                       | 0          | 3                                          | 0.741         | 0(0-Inf)               |
| PANSINUSITIS, NOS                                             | 3                                       | 21.6924    | 84                                         | 20.533        | 1.0565(0.333-3.3522)   |
| PAPILLA OF VATER CONDITION (NOS)-SEE ALSO BILE DUCT DX STATED | 0                                       | 0          | 9                                          | 6.1504        | 0(0-Inf)               |
| PAPILLEDEMA, NOS                                              | 0                                       | 0          | 6                                          | 1.5597        | 0(0-Inf)               |
| PAPILLITIS, ANORECTAL                                         | 0                                       | 0          | 1                                          | 0.2729        | 0(0-Inf)               |
| PAPILLITIS, NOS (EYE)                                         | 0                                       | 0          | 4                                          | 1.5798        | 0(0-Inf)               |
| PAPILLITIS, TONGUE                                            | 0                                       | 0          | 3                                          | 0.9773        | 0(0-Inf)               |
| PAPILLO-ADENOCARCINOMA CODE ALSO NEOPLASM MALIGNANT BY SITE   | 0                                       | 0          | 1                                          | 0.8528        | 0(0-Inf)               |
| PAPILLOMA, AUDITORY CANAL                                     | 0                                       | 0          | 3                                          | 0.6536        | 0(0-Inf)               |
| PAPILLOMA, BASAL CELL                                         | 0                                       | 0          | 1                                          | 0.4751        | 0(0-Inf)               |
| PAPILLOMA, BLADDER                                            | 0                                       | 0          | 13                                         | 6.8282        | 0(0-Inf)               |
| PAPILLOMA, BREAST                                             | 1                                       | 7.1634     | 41                                         | 9.0112        | 0.7949(0.1088-5.8067)  |
| PAPILLOMA, CERVIX                                             | 0                                       | 0          | 1                                          | 0.398         | 0(0-Inf)               |
| PAPILLOMA, CHOROID PLEXUS                                     | 0                                       | 0          | 1                                          | 0.8878        | 0(0-Inf)               |

| Description                                                    | No. of Positive Cases with Disease Code | Case Rate* | No. of Positive Controls with Disease Code | Control Rate* | Relative Risk (95%CI)    |
|----------------------------------------------------------------|-----------------------------------------|------------|--------------------------------------------|---------------|--------------------------|
| PAPILLOMA, COLON                                               | 0                                       | 0          | 1                                          | 0.4751        | 0(0-Inf)                 |
| PAPILLOMA, CONJUNCTIVA                                         | 0                                       | 0          | 4                                          | 1.0274        | 0(0-Inf)                 |
| PAPILLOMA, INTRADUCTAL (BREAST)                                | 2                                       | 28.7511    | 71                                         | 31.0881       | 0.9248(0.226-3.785)      |
| PAPILLOMA, KIDNEY PELVIS                                       | 0                                       | 0          | 1                                          | 0.3526        | 0(0-Inf)                 |
| PAPILLOMA, LARYNX, NOS                                         | 0                                       | 0          | 1                                          | 0.2729        | 0(0-Inf)                 |
| PAPILLOMA, LID                                                 | 6                                       | 41.8896    | 187                                        | 46.6291       | 0.8984(0.3976-2.0296)    |
| PAPILLOMA, MALIGNANT, CODE ALSO NEOPLASM, MALIGNANT BY SITE    | 0                                       | 0          | 3                                          | 0.7884        | 0(0-Inf)                 |
| PAPILLOMA, NOS, CODE ALSO NEOPLASM, BENIGN BY SITE             | 23                                      | 167.8044   | 662                                        | 162.5997      | 1.032(0.6802-1.5658)     |
| PAPILLOMA, NOSE, SKIN                                          | 0                                       | 0          | 12                                         | 2.743         | 0(0-Inf)                 |
| PAPILLOMA, NOSE/NASAL CAVITY/NASAL SEPTUM/NOS                  | 0                                       | 0          | 17                                         | 4.2282        | 0(0-Inf)                 |
| PAPILLOMA, SINUS NEC/NOS                                       | 0                                       | 0          | 3                                          | 1.2104        | 0(0-Inf)                 |
| PAPILLOMATOSIS, BREAST                                         | 1                                       | 15.1211    | 50                                         | 21.6603       | 0.6981(0.0961-5.0734)    |
| PAPULE, NOS                                                    | 13                                      | 93.7749    | 461                                        | 131.1186      | 0.7152(0.4116-1.2427)    |
| PAPULE, PICKER'S                                               | 2                                       | 16.4602    | 72                                         | 26.9348       | 0.6111(0.1496-2.4967)    |
| PAPULOSIS, BOWENOID, PENIS, SEE ALSO DISEASE, BOWEN'S          | 0                                       | 0          | 1                                          | 0.8879        | 0(0-Inf)                 |
| PAPULOSIS, LYMPHOMATOID                                        | 0                                       | 0          | 3                                          | 3.7606        | 0(0-Inf)                 |
| PARAFFINOMA                                                    | 0                                       | 0          | 1                                          | 0.4049        | 0(0-Inf)                 |
| PARAGANGLIOMA, NOS                                             | 0                                       | 0          | 3                                          | 0.741         | 0(0-Inf)                 |
| PARAGEUSIA                                                     | 0                                       | 0          | 1                                          | 0.398         | 0(0-Inf)                 |
| PARAKERATOSIS, ACTINIC                                         | 0                                       | 0          | 11                                         | 2.774         | 0(0-Inf)                 |
| PARAKERATOSIS, GENITAL (FEMALE)                                | 0                                       | 0          | 3                                          | 0.7021        | 0(0-Inf)                 |
| PARAKERATOSIS, NOS                                             | 3                                       | 20.851     | 45                                         | 11.3778       | 1.8326(0.5663-5.931)     |
| PARALYSIS, ABDUCENS NERVE (SIXTH CRANIAL)                      | 0                                       | 0          | 10                                         | 2.9359        | 0(0-Inf)                 |
| PARALYSIS, ACCESSORY NERVE (ELEVENTH CRANIAL)                  | 0                                       | 0          | 3                                          | 0.9166        | 0(0-Inf)                 |
| PARALYSIS, ACCOMMODATION                                       | 0                                       | 0          | 1                                          | 0.8534        | 0(0-Inf)                 |
| PARALYSIS, ANAL SPHINCTER                                      | 0                                       | 0          | 1                                          | 0.2729        | 0(0-Inf)                 |
| PARALYSIS, ARM, NOS                                            | 1                                       | 9.2153     | 2                                          | 0.8884        | 10.3731(0.9101-118.2314) |
| PARALYSIS, ATHETOID                                            | 0                                       | 0          | 1                                          | 0.398         | 0(0-Inf)                 |
| PARALYSIS, BELL'S                                              | 0                                       | 0          | 3                                          | 0.6549        | 0(0-Inf)                 |
| PARALYSIS, CERVICAL PLEXUS                                     | 0                                       | 0          | 1                                          | 0.234         | 0(0-Inf)                 |
| PARALYSIS, CONGENITAL, SEE ALSO PALSY, CEREBRAL                | 0                                       | 0          | 3                                          | 0.9608        | 0(0-Inf)                 |
| PARALYSIS, CRANIAL NERVE VII (FACIAL NERVE)                    | 1                                       | 8.0794     | 29                                         | 10.3758       | 0.7787(0.1056-5.7434)    |
| PARALYSIS, CRANIAL NERVE, II (OPTIC NERVE)                     | 0                                       | 0          | 1                                          | 0.2354        | 0(0-Inf)                 |
| PARALYSIS, CRANIAL NERVE, III (OCULOMOTOR NERVE)               | 2                                       | 19.3088    | 30                                         | 14.2646       | 1.3536(0.322-5.6912)     |
| PARALYSIS, CRANIAL NERVE, III (OCULOMOTOR), ALTERNATING        | 0                                       | 0          | 1                                          | 0.2729        | 0(0-Inf)                 |
| PARALYSIS, CRANIAL NERVE, III (OCULOMOTOR), EXTERNAL BILATERAL | 0                                       | 0          | 1                                          | 0.3527        | 0(0-Inf)                 |
| PARALYSIS, CRANIAL NERVE, IV (TROCHLEAR NERVE)                 | 3                                       | 26.6036    | 52                                         | 21.7009       | 1.2259(0.3815-3.9395)    |
| PARALYSIS, CRANIAL NERVE, IX (GLOSSOPHARYNGEAL NERVE)          | 0                                       | 0          | 1                                          | 0.4048        | 0(0-Inf)                 |



| Description                                                        | No. of Positive Cases with Disease Code | Case Rate* | No. of Positive Controls with Disease Code | Control Rate* | Relative Risk (95%CI)  |
|--------------------------------------------------------------------|-----------------------------------------|------------|--------------------------------------------|---------------|------------------------|
| PARALYSIS, CRANIAL NERVE, NOS                                      | 0                                       | 0          | 6                                          | 3.5958        | 0(0-Inf)               |
| PARALYSIS, CRANIAL NERVE, POST-OP (CODE ALSO BY SITE IF STATED)    | 0                                       | 0          | 1                                          | 0.4048        | 0(0-Inf)               |
| PARALYSIS, CRANIAL NERVE, V (TRIGEMINAL NERVE)                     | 0                                       | 0          | 3                                          | 1.5756        | 0(0-Inf)               |
| PARALYSIS, CRANIAL NERVE, VI (ABDUCENS NERVE)                      | 2                                       | 17.9216    | 72                                         | 30.4742       | 0.5881(0.1439-2.4028)  |
| PARALYSIS, CRANIAL NERVE, VII, DUE TO BIRTH INJURY                 | 0                                       | 0          | 1                                          | 0.398         | 0(0-Inf)               |
| PARALYSIS, CRANIAL NERVE, VII, DUE TO OPERATION                    | 0                                       | 0          | 2                                          | 0.591         | 0(0-Inf)               |
| PARALYSIS, CRANIAL NERVE, VIII (ACOUSTIC NERVE)                    | 0                                       | 0          | 1                                          | 0.8528        | 0(0-Inf)               |
| PARALYSIS, CRANIAL NERVE, X (VAGUS NERVE)(PNEUMOGASTRIC NERVE)     | 0                                       | 0          | 4                                          | 1.84          | 0(0-Inf)               |
| PARALYSIS, CRANIAL NERVE, XII (HYPOGLOSSAL NERVE)                  | 0                                       | 0          | 3                                          | 1.1478        | 0(0-Inf)               |
| PARALYSIS, CROSSED LEG                                             | 0                                       | 0          | 6                                          | 1.5211        | 0(0-Inf)               |
| PARALYSIS, DEGLUTITION                                             | 0                                       | 0          | 1                                          | 0.2354        | 0(0-Inf)               |
| PARALYSIS, DIAPHRAGM, NOS                                          | 0                                       | 0          | 27                                         | 8.901         | 0(0-Inf)               |
| PARALYSIS, DIAPHRAGM, POST-OP, CODE ALSO COMPLICATION, SURG        | 0                                       | 0          | 9                                          | 3.0238        | 0(0-Inf)               |
| PARALYSIS, DUE TO OLD CEREBRAL EMBOLISM                            | 0                                       | 0          | 2                                          | 0.5909        | 0(0-Inf)               |
| PARALYSIS, EXTREMITY, LOWER, COMPRESSION                           | 0                                       | 0          | 1                                          | 0.2354        | 0(0-Inf)               |
| PARALYSIS, EXTREMITY, LOWER, FLACCID                               | 0                                       | 0          | 1                                          | 0.398         | 0(0-Inf)               |
| PARALYSIS, EXTREMITY, LOWER, NOS                                   | 0                                       | 0          | 16                                         | 6.6352        | 0(0-Inf)               |
| PARALYSIS, EXTREMITY, UPPER, NOS                                   | 0                                       | 0          | 6                                          | 3.1474        | 0(0-Inf)               |
| PARALYSIS, EYE MUSCLE, NEC                                         | 0                                       | 0          | 9                                          | 2.7498        | 0(0-Inf)               |
| PARALYSIS, FACIAL NERVE (VII CRANIAL), SEE ALSO PARALYSIS, CRANIAL | 3                                       | 23.5548    | 39                                         | 13.2378       | 1.7794(0.5466-5.7921)  |
| PARALYSIS, FAMILIAL                                                | 1                                       | 11.7078    | 0                                          | 0             | 8837310694.3697(0-Inf) |
| PARALYSIS, FAMILIAL, SPASTIC                                       | 0                                       | 0          | 2                                          | 0.4854        | 0(0-Inf)               |
| PARALYSIS, FINGER                                                  | 0                                       | 0          | 2                                          | 0.8102        | 0(0-Inf)               |
| PARALYSIS, FOOT                                                    | 0                                       | 0          | 1                                          | 0.234         | 0(0-Inf)               |
| PARALYSIS, GAIT                                                    | 0                                       | 0          | 1                                          | 0.8878        | 0(0-Inf)               |
| PARALYSIS, GAZE, SEE ALSO STRABISMUS                               | 1                                       | 13.6227    | 5                                          | 3.847         | 3.5411(0.4083-30.7076) |
| PARALYSIS, GLOTTIS                                                 | 0                                       | 0          | 2                                          | 0.5709        | 0(0-Inf)               |
| PARALYSIS, HAND                                                    | 0                                       | 0          | 1                                          | 0.3526        | 0(0-Inf)               |
| PARALYSIS, HYPERKALEMIC                                            | 1                                       | 11.7078    | 0                                          | 0             | 8837310694.3697(0-Inf) |
| PARALYSIS, HYPOGLOSSAL NERVE (TWELFTH CRANIAL)                     | 1                                       | 11.6663    | 0                                          | 0             | 8825777786.3375(0-Inf) |
| PARALYSIS, IDIOPATHIC                                              | 0                                       | 0          | 7                                          | 3.4435        | 0(0-Inf)               |
| PARALYSIS, INTEROSSEOUS                                            | 0                                       | 0          | 2                                          | 0.9507        | 0(0-Inf)               |
| PARALYSIS, LARYNGEAL NERVE                                         | 1                                       | 7.0028     | 41                                         | 10.7237       | 0.653(0.0894-4.7675)   |
| PARALYSIS, LATERAL                                                 | 0                                       | 0          | 1                                          | 0.8878        | 0(0-Inf)               |
| PARALYSIS, LEG, NOS                                                | 2                                       | 15.0498    | 7                                          | 2.2045        | 6.8267(1.3879-33.5775) |
| PARALYSIS, LEVATOR PALPEBRAE SUPERIORIS                            | 0                                       | 0          | 1                                          | 0.234         | 0(0-Inf)               |

| Description                                                     | No. of Positive Cases with Disease Code | Case Rate* | No. of Positive Controls with Disease Code | Control Rate* | Relative Risk (95%CI)    |
|-----------------------------------------------------------------|-----------------------------------------|------------|--------------------------------------------|---------------|--------------------------|
| PARALYSIS, MEDIAN NERVE                                         | 0                                       | 0          | 2                                          | 0.432         | 0(0-Inf)                 |
| PARALYSIS, MUSCULAR, NOS                                        | 0                                       | 0          | 2                                          | 0.4853        | 0(0-Inf)                 |
| PARALYSIS, NERVE, NOS                                           | 1                                       | 9.4763     | 2                                          | 0.9257        | 10.2364(0.8942-117.1869) |
| PARALYSIS, NERVE, POSTOP (CODE ALSO BY SITE IF STATED)          | 0                                       | 0          | 3                                          | 1.5107        | 0(0-Inf)                 |
| PARALYSIS, NERVE, THORACIC                                      | 0                                       | 0          | 2                                          | 0.6309        | 0(0-Inf)                 |
| PARALYSIS, NOS, SEE ALSO PALSY/PAREISIS                         | 1                                       | 14.3994    | 3                                          | 2.4583        | 5.8574(0.6-57.1838)      |
| PARALYSIS, OCULAR NERVE                                         | 0                                       | 0          | 1                                          | 0.2354        | 0(0-Inf)                 |
| PARALYSIS, OCULOMOTOR (III CRANIAL) SEE ALSO PARALYSIS, CRANIAL | 0                                       | 0          | 1                                          | 0.8877        | 0(0-Inf)                 |
| PARALYSIS, OPTIC NERVE (SECOND CRANIAL NERVE)                   | 1                                       | 32.1125    | 0                                          | 0             | 14559497289.9602(0-Inf)  |
| PARALYSIS, PERIODIC, FAMILIAL                                   | 1                                       | 11.7117    | 0                                          | 0             | 8840094044.4407(0-Inf)   |
| PARALYSIS, PERIODIC, HYPOKALEMIC                                | 1                                       | 11.7057    | 0                                          | 0             | 8835868182.6787(0-Inf)   |
| PARALYSIS, PERIODIC, NOS                                        | 1                                       | 11.7222    | 0                                          | 0             | 8847428292.9733(0-Inf)   |
| PARALYSIS, PERIPHERAL NERVE, NEC                                | 0                                       | 0          | 2                                          | 0.5475        | 0(0-Inf)                 |
| PARALYSIS, PERONEAL NERVE                                       | 0                                       | 0          | 6                                          | 1.9218        | 0(0-Inf)                 |
| PARALYSIS, PHARYNX                                              | 0                                       | 0          | 1                                          | 0.2354        | 0(0-Inf)                 |
| PARALYSIS, PHRENIC NERVE                                        | 0                                       | 0          | 3                                          | 1.2107        | 0(0-Inf)                 |
| PARALYSIS, PRESSURE, NOS, SEE ALSO COMPRESSION NERVE            | 0                                       | 0          | 1                                          | 0.4048        | 0(0-Inf)                 |
| PARALYSIS, PROGRESSIVE, NOS                                     | 0                                       | 0          | 7                                          | 6.5512        | 0(0-Inf)                 |
| PARALYSIS, PROGRESSIVE, SPINAL                                  | 0                                       | 0          | 1                                          | 0.3526        | 0(0-Inf)                 |
| PARALYSIS, PSEUDOBULBAR                                         | 1                                       | 8.9042     | 4                                          | 1.741         | 5.1145(0.5565-47.0089)   |
| PARALYSIS, RECTUS MUSCLE (EYE)                                  | 1                                       | 7.8877     | 6                                          | 2.0512        | 3.8453(0.4539-32.575)    |
| PARALYSIS, RESIDUAL, NEC                                        | 0                                       | 0          | 1                                          | 0.888         | 0(0-Inf)                 |
| PARALYSIS, RESPIRATORY, NOS                                     | 0                                       | 0          | 1                                          | 1.9059        | 0(0-Inf)                 |
| PARALYSIS, SERRATUS MAGNUS                                      | 0                                       | 0          | 1                                          | 0.2729        | 0(0-Inf)                 |
| PARALYSIS, SLEEP                                                | 0                                       | 0          | 4                                          | 1.5798        | 0(0-Inf)                 |
| PARALYSIS, SPASTIC, FAMILIAL, CONGENITAL                        | 0                                       | 0          | 2                                          | 0.5069        | 0(0-Inf)                 |
| PARALYSIS, SPASTIC, INFANTILE                                   | 0                                       | 0          | 2                                          | 0.4854        | 0(0-Inf)                 |
| PARALYSIS, SPASTIC, INFANTILE, ACQUIRED                         | 0                                       | 0          | 1                                          | 1.0368        | 0(0-Inf)                 |
| PARALYSIS, SPASTIC, NOS                                         | 1                                       | 7.0019     | 47                                         | 12.3775       | 0.5657(0.0778-4.1146)    |
| PARALYSIS, SPASTIC, SPINAL                                      | 1                                       | 6.9662     | 9                                          | 2.2539        | 3.0907(0.3858-24.7596)   |
| PARALYSIS, SPINAL, NERVE                                        | 0                                       | 0          | 4                                          | 1.0301        | 0(0-Inf)                 |
| PARALYSIS, SPINAL, NOS                                          | 1                                       | 7.1803     | 5                                          | 1.3959        | 5.1439(0.5847-45.2551)   |
| PARALYSIS, SPINAL, PARAPLEGIC                                   | 1                                       | 6.9407     | 9                                          | 2.3084        | 3.0067(0.3751-24.1032)   |
| PARALYSIS, STOMACH, NOS                                         | 0                                       | 0          | 1                                          | 0.2729        | 0(0-Inf)                 |
| PARALYSIS, STROKE, LATE EFFECT OR OLD                           | 0                                       | 0          | 2                                          | 1.1973        | 0(0-Inf)                 |
| PARALYSIS, SUPRANUCLEAR                                         | 1                                       | 12.0545    | 10                                         | 6.5263        | 1.8471(0.2344-14.5539)   |
| PARALYSIS, SUPRANUCLEAR, PROGRESSIVE                            | 1                                       | 13.9495    | 12                                         | 9.592         | 1.4543(0.1879-11.256)    |
| PARALYSIS, THIGH                                                | 0                                       | 0          | 1                                          | 1.9059        | 0(0-Inf)                 |
| PARALYSIS, TODD'S                                               | 0                                       | 0          | 5                                          | 2.7725        | 0(0-Inf)                 |

| Description                                                           | No. of Positive Cases with Disease Code | Case Rate* | No. of Positive Controls with Disease Code | Control Rate* | Relative Risk (95%CI)   |
|-----------------------------------------------------------------------|-----------------------------------------|------------|--------------------------------------------|---------------|-------------------------|
| PARALYSIS, TONGUE                                                     | 0                                       | 0          | 2                                          | 0.5069        | 0(0-Inf)                |
| PARALYSIS, TRANSIENT, NEC                                             | 0                                       | 0          | 3                                          | 2.0497        | 0(0-Inf)                |
| PARALYSIS, TRAUMATIC, CODE ALSO INJURY, NERVE BY SITE IF STATED       | 0                                       | 0          | 4                                          | 0.9708        | 0(0-Inf)                |
| PARALYSIS, TRIGEMINAL NERVE (FIFTH CRANIAL)                           | 0                                       | 0          | 1                                          | 0.2354        | 0(0-Inf)                |
| PARALYSIS, TROCHLEAR NERVE (FOURTH CRANIAL)                           | 0                                       | 0          | 3                                          | 0.9166        | 0(0-Inf)                |
| PARALYSIS, ULNAR NERVE                                                | 0                                       | 0          | 2                                          | 0.4854        | 0(0-Inf)                |
| PARALYSIS, VAGUS NERVE (TENTH CRANIAL)                                | 0                                       | 0          | 1                                          | 0.2729        | 0(0-Inf)                |
| PARALYSIS, VESTIBULAR NERVE                                           | 0                                       | 0          | 1                                          | 0.8528        | 0(0-Inf)                |
| PARALYSIS, VOCAL CORD                                                 | 2                                       | 15.5319    | 94                                         | 31.609        | 0.4914(0.1209-1.9978)   |
| PARANEOPLASTIC/PERINEOPLASTIC CONDITION SEE ALSO SYNDROME             | 0                                       | 0          | 3                                          | 0.8017        | 0(0-Inf)                |
| PARANOIA, NOS                                                         | 5                                       | 61.7617    | 122                                        | 85.8529       | 0.7194(0.2936-1.7625)   |
| PARANOIA, STATES, NOS                                                 | 0                                       | 0          | 13                                         | 3.5672        | 0(0-Inf)                |
| PARAPARESIS, NOS, SEE ALSO PARALYSIS/PALSY (CEREBRAL#)                | 1                                       | 8.1832     | 17                                         | 6.2017        | 1.3195(0.1742-9.9955)   |
| PARAPARESIS, SPINAL, NOS, SEE ALSO PARALYSIS                          | 0                                       | 0          | 11                                         | 6.7443        | 0(0-Inf)                |
| PARAPARESIS, WITH MULTIPLE SCLEROSIS                                  | 0                                       | 0          | 3                                          | 1.5755        | 0(0-Inf)                |
| PARAPHASIA                                                            | 0                                       | 0          | 1                                          | 0.2729        | 0(0-Inf)                |
| PARAPHIMOSIS                                                          | 0                                       | 0          | 16                                         | 10.3921       | 0(0-Inf)                |
| PARAPLEGIA, NOS (CEREBRAL)                                            | 1                                       | 6.9659     | 18                                         | 4.6976        | 1.4828(0.1963-11.2038)  |
| PARAPLEGIA, SPASTIC, INFANTILE                                        | 0                                       | 0          | 3                                          | 0.6536        | 0(0-Inf)                |
| PARAPLEGIA, SPINAL CORD, NOS                                          | 1                                       | 8.3947     | 17                                         | 6.5855        | 1.2747(0.1685-9.6415)   |
| PARAPROTEINEMIA                                                       | 1                                       | 7.1824     | 0                                          | 0             | 12728581439.4012(0-Inf) |
| PARAPSORIASIS, EN PLAQUE                                              | 0                                       | 0          | 5                                          | 2.2774        | 0(0-Inf)                |
| PARAPSORIASIS, GUTTATE                                                | 0                                       | 0          | 7                                          | 1.7376        | 0(0-Inf)                |
| PARAPSORIASIS, NOS                                                    | 0                                       | 0          | 17                                         | 4.1402        | 0(0-Inf)                |
| PARASITE, INTESTINAL, NOS                                             | 0                                       | 0          | 4                                          | 1.0302        | 0(0-Inf)                |
| PARASITE, SKIN, NOS                                                   | 0                                       | 0          | 1                                          | 0.2354        | 0(0-Inf)                |
| PARASOMNIA CONDITIONS NOS (NOT NECESSARY TO CODE WITH OTHER SLEEP DX) | 0                                       | 0          | 13                                         | 6.5495        | 0(0-Inf)                |
| PARESIS, BLADDER, NOS                                                 | 0                                       | 0          | 1                                          | 2.4857        | 0(0-Inf)                |
| PARESIS, FACIAL                                                       | 0                                       | 0          | 4                                          | 1.142         | 0(0-Inf)                |
| PARESIS, LEG (NOT DUE TO CVA)                                         | 0                                       | 0          | 2                                          | 1.0788        | 0(0-Inf)                |
| PARESIS, NOS, SEE ALSO PARALYSIS/PALSY                                | 1                                       | 19.5123    | 9                                          | 11.0832       | 1.7605(0.2218-13.9727)  |
| PARESIS, UPPER LIMB                                                   | 0                                       | 0          | 9                                          | 5.1886        | 0(0-Inf)                |
| PARESTHESIA, FACE                                                     | 1                                       | 6.939      | 88                                         | 21.8996       | 0.3169(0.0441-2.2789)   |
| PARESTHESIA, LOWER EXTREMITY                                          | 13                                      | 94.2886    | 414                                        | 118.8785      | 0.7932(0.456-1.3795)    |
| PARESTHESIA, NOS                                                      | 11                                      | 78.5467    | 414                                        | 114.746       | 0.6845(0.3757-1.2474)   |
| PARESTHESIA, TRUNK                                                    | 2                                       | 15.5237    | 127                                        | 42.2075       | 0.3678(0.0908-1.4893)   |
| PARESTHESIA, UPPER EXTREMITY                                          | 11                                      | 77.7893    | 541                                        | 145.175       | 0.5358(0.2947-0.9743)   |

| Description                                               | No. of Positive Cases with Disease Code | Case Rate* | No. of Positive Controls with Disease Code | Control Rate* | Relative Risk (95%CI)  |
|-----------------------------------------------------------|-----------------------------------------|------------|--------------------------------------------|---------------|------------------------|
| PARKINSONIAN FEATURES                                     | 1                                       | 15.3724    | 31                                         | 28.3734       | 0.5418(0.0738-3.9783)  |
| PARKINSONISM, DEMENTIA COMPLEX                            | 0                                       | 0          | 5                                          | 4.7324        | 0(0-Inf)               |
| PARKINSONISM, DRUG-INDUCED                                | 0                                       | 0          | 16                                         | 5.5151        | 0(0-Inf)               |
| PARKINSONISM, NOS                                         | 16                                      | 221.8769   | 330                                        | 261.0215      | 0.85(0.5141-1.4053)    |
| PARKINSONISM, WITH DEMENTIA                               | 4                                       | 71.5631    | 37                                         | 41.2976       | 1.7329(0.6158-4.8764)  |
| PARKINSON'S PLUS (CODE ALSO ADDITIONAL CONDITION STATED)  | 1                                       | 11.4056    | 8                                          | 4.8571        | 2.3482(0.2904-18.9891) |
| PARONYCHIA, CHRONIC, CANDIDAL                             | 1                                       | 6.9861     | 11                                         | 2.6652        | 2.6212(0.3338-20.5848) |
| PARONYCHIA, NOS                                           | 41                                      | 296.2786   | 1012                                       | 271.7606      | 1.0902(0.797-1.4912)   |
| PAROSMIA                                                  | 0                                       | 0          | 5                                          | 1.2832        | 0(0-Inf)               |
| PAROTITIS, NOS                                            | 9                                       | 67.6136    | 137                                        | 42.3247       | 1.5975(0.8112-3.1458)  |
| PARTURITION--PART                                         | 2                                       | 228.5818   | 146                                        | 236.8412      | 0.9651(0.2391-3.8958)  |
| PARVOVIRUS, B-19                                          | 0                                       | 0          | 1                                          | 0.234         | 0(0-Inf)               |
| PARVOVIRUS, NOS                                           | 0                                       | 0          | 6                                          | 1.3483        | 0(0-Inf)               |
| PATCH, PEYER'S                                            | 0                                       | 0          | 1                                          | 0.234         | 0(0-Inf)               |
| PATENT, DUCTUS ARTERIOSIS--PDA                            | 0                                       | 0          | 4                                          | 0.9708        | 0(0-Inf)               |
| PATENT, EUSTACHIAN TUBE                                   | 1                                       | 7.5161     | 20                                         | 4.7506        | 1.5822(0.2106-11.8854) |
| PATENT, EUSTACHIAN VALVE                                  | 0                                       | 0          | 2                                          | 0.6309        | 0(0-Inf)               |
| PATENT, FORAMEN OVALE                                     | 4                                       | 41.1909    | 150                                        | 78.2626       | 0.5263(0.1947-1.4227)  |
| PATENT, FOSSA OVALIS                                      | 0                                       | 0          | 1                                          | 0.4048        | 0(0-Inf)               |
| PATENT, URACHUS                                           | 0                                       | 0          | 1                                          | 0.3526        | 0(0-Inf)               |
| PATHWAYS DUAL A-V NODAL                                   | 0                                       | 0          | 3                                          | 0.7175        | 0(0-Inf)               |
| PATULOUS ANUS (SEE ALSO PATENT/RELAXED/MOTILITY DISORDER) | 0                                       | 0          | 5                                          | 1.2695        | 0(0-Inf)               |
| PAUSE (SINOATRIAL)                                        | 5                                       | 73.0487    | 76                                         | 65.076        | 1.1225(0.4531-2.7807)  |
| PECTUS, EXCAVATUM                                         | 1                                       | 7.2633     | 29                                         | 6.9831        | 1.0401(0.1409-7.6777)  |
| PEDICULOSIS                                               | 0                                       | 0          | 11                                         | 3.7376        | 0(0-Inf)               |
| PEDICULUS, CAPITIS                                        | 0                                       | 0          | 4                                          | 1.0398        | 0(0-Inf)               |
| PEDICULUS, CORPORIS                                       | 0                                       | 0          | 3                                          | 1.2701        | 0(0-Inf)               |
| PEDICULUS, NOS                                            | 0                                       | 0          | 3                                          | 0.7798        | 0(0-Inf)               |
| PEDICULUS, PUBIS                                          | 0                                       | 0          | 15                                         | 5.9246        | 0(0-Inf)               |
| PEELING SKIN                                              | 0                                       | 0          | 2                                          | 0.5908        | 0(0-Inf)               |
| PELVIC, KIDNEY                                            | 0                                       | 0          | 1                                          | 0.234         | 0(0-Inf)               |
| PELVIOLITHIASIS (SEE ALSO RENAL CALCULUS)                 | 3                                       | 21.567     | 13                                         | 3.2423        | 6.6518(1.8686-23.6788) |
| PEMPHIGOID, BULLOUS                                       | 0                                       | 0          | 38                                         | 27.5872       | 0(0-Inf)               |
| PEMPHIGOID, CICATRICIAL                                   | 0                                       | 0          | 6                                          | 1.9228        | 0(0-Inf)               |
| PEMPHIGOID, MUCUS MEMBRANE                                | 0                                       | 0          | 3                                          | 0.6536        | 0(0-Inf)               |
| PEMPHIGOID, NOS                                           | 0                                       | 0          | 16                                         | 11.3712       | 0(0-Inf)               |
| PEMPHIGOID, OCULAR                                        | 0                                       | 0          | 2                                          | 1.8982        | 0(0-Inf)               |
| PEMPHIGUS, ERYTHEMATOSUS                                  | 0                                       | 0          | 1                                          | 0.8878        | 0(0-Inf)               |

| Description                                                          | No. of Positive Cases with Disease Code | Case Rate* | No. of Positive Controls with Disease Code | Control Rate* | Relative Risk (95%CI)  |
|----------------------------------------------------------------------|-----------------------------------------|------------|--------------------------------------------|---------------|------------------------|
| PEMPHIGUS, FOLIACEUS                                                 | 0                                       | 0          | 1                                          | 0.8878        | 0(0-Inf)               |
| PEMPHIGUS, NOS                                                       | 0                                       | 0          | 9                                          | 2.628         | 0(0-Inf)               |
| PEMPHIGUS, VULGARIS                                                  | 0                                       | 0          | 3                                          | 1.5756        | 0(0-Inf)               |
| PENDULOUS BREAST                                                     | 1                                       | 15.8261    | 11                                         | 4.7801        | 3.3108(0.4207-26.054)  |
| PENITIS                                                              | 0                                       | 0          | 1                                          | 2.4855        | 0(0-Inf)               |
| PERCHED FACET, VERTEBRA (TRAUMATIC) CODE ALSO DISLOCATION BY SITE    | 0                                       | 0          | 1                                          | 0.234         | 0(0-Inf)               |
| PERFORATION, APPENDIX                                                | 0                                       | 0          | 5                                          | 1.2695        | 0(0-Inf)               |
| PERFORATION, ATTIC, EAR                                              | 0                                       | 0          | 1                                          | 0.8529        | 0(0-Inf)               |
| PERFORATION, CECUM                                                   | 1                                       | 9.5352     | 6                                          | 2.7964        | 3.4098(0.404-28.779)   |
| PERFORATION, COLON                                                   | 0                                       | 0          | 35                                         | 13.7288       | 0(0-Inf)               |
| PERFORATION, CORNEA, NOS                                             | 0                                       | 0          | 1                                          | 0.2354        | 0(0-Inf)               |
| PERFORATION, DUODENUM                                                | 0                                       | 0          | 5                                          | 4.7331        | 0(0-Inf)               |
| PERFORATION, EAR DRUM (NON-TRAUMATIC)                                | 0                                       | 0          | 36                                         | 8.9573        | 0(0-Inf)               |
| PERFORATION, ESOPHAGUS                                               | 0                                       | 0          | 6                                          | 3.1529        | 0(0-Inf)               |
| PERFORATION, GALLBLADDER                                             | 0                                       | 0          | 6                                          | 7.7677        | 0(0-Inf)               |
| PERFORATION, GASTRIC                                                 | 0                                       | 0          | 4                                          | 1.1418        | 0(0-Inf)               |
| PERFORATION, ILEUM                                                   | 0                                       | 0          | 8                                          | 3.5422        | 0(0-Inf)               |
| PERFORATION, INTESTINE                                               | 1                                       | 10.8678    | 19                                         | 10.7898       | 1.0072(0.1341-7.5658)  |
| PERFORATION, JEJUNUM                                                 | 0                                       | 0          | 6                                          | 4.1927        | 0(0-Inf)               |
| PERFORATION, NASAL SEPTUM                                            | 0                                       | 0          | 61                                         | 15.6667       | 0(0-Inf)               |
| PERFORATION, NASAL SEPTUM, CONGENITAL                                | 0                                       | 0          | 2                                          | 0.5709        | 0(0-Inf)               |
| PERFORATION, PALATE, SOFT                                            | 0                                       | 0          | 1                                          | 0.3526        | 0(0-Inf)               |
| PERFORATION, RECTUM                                                  | 1                                       | 18.1583    | 2                                          | 2.3776        | 7.6374(0.6803-85.7398) |
| PERFORATION, RECTUM, BY INSTRUMENT                                   | 0                                       | 0          | 1                                          | 0.3526        | 0(0-Inf)               |
| PERFORATION, SIGMOID                                                 | 5                                       | 41.1119    | 37                                         | 13.5617       | 3.0315(1.1825-7.7713)  |
| PERFORATION, SMALL BOWEL                                             | 1                                       | 6.9406     | 9                                          | 2.3082        | 3.0069(0.3751-24.1049) |
| PERFORATION, SURGICAL, CODE ALSO INJURY BY SITE                      | 0                                       | 0          | 21                                         | 10.4808       | 0(0-Inf)               |
| PERFORATION, TRAUMATIC, EXTERNAL, CODE ALSO WOUND, OPEN BY SITE      | 0                                       | 0          | 1                                          | 0.8878        | 0(0-Inf)               |
| PERFORATION, TRAUMATIC, INTERNAL, CODE ALSO INJURY, INTERNAL BY SITE | 0                                       | 0          | 2                                          | 0.7896        | 0(0-Inf)               |
| PERFORATION, TYMPANIC MEMBRANE (NON-TRAUMATIC)                       | 13                                      | 93.3218    | 201                                        | 56.0567       | 1.6648(0.9476-2.9248)  |
| PERFORATION, TYMPANUM (NON-TRAUMATIC)                                | 1                                       | 7.1665     | 48                                         | 13.5907       | 0.5273(0.0725-3.8329)  |
| PERFORATION, TYMPANUM, TRAUMATIC, SEE ALSO WOUND, OPEN BY SITE       | 0                                       | 0          | 15                                         | 4.1395        | 0(0-Inf)               |
| PERFORATION, URETER                                                  | 0                                       | 0          | 1                                          | 0.8877        | 0(0-Inf)               |
| PERFORATION, VAGINA                                                  | 0                                       | 0          | 1                                          | 0.8538        | 0(0-Inf)               |
| PERIAPPENDICITIS (SEE ALSO APPENDICITIS)                             | 0                                       | 0          | 28                                         | 8.0606        | 0(0-Inf)               |
| PERIARTERITIS NODOSA                                                 | 0                                       | 0          | 3                                          | 0.7971        | 0(0-Inf)               |

| Description                                         | No. of Positive Cases with Disease Code | Case Rate* | No. of Positive Controls with Disease Code | Control Rate* | Relative Risk (95%CI)  |
|-----------------------------------------------------|-----------------------------------------|------------|--------------------------------------------|---------------|------------------------|
| PERIARTHRITIS, NOS                                  | 0                                       | 0          | 22                                         | 5.9039        | 0(0-Inf)               |
| PERIARTHRITIS, SHOULDER                             | 24                                      | 177.0379   | 542                                        | 130.8097      | 1.3534(0.8979-2.0399)  |
| PERICAPSULITIS (NOS)                                | 0                                       | 0          | 2                                          | 0.4708        | 0(0-Inf)               |
| PERICARDITIS, ACUTE                                 | 2                                       | 13.8662    | 24                                         | 6.1942        | 2.2386(0.5249-9.5478)  |
| PERICARDITIS, ACUTE, IDIOPATHIC                     | 0                                       | 0          | 4                                          | 1.1114        | 0(0-Inf)               |
| PERICARDITIS, CHRONIC                               | 0                                       | 0          | 6                                          | 2.5201        | 0(0-Inf)               |
| PERICARDITIS, CONSTRICTIVE                          | 1                                       | 7.7616     | 13                                         | 4.4017        | 1.7633(0.2286-13.603)  |
| PERICARDITIS, FIBRINOUS                             | 0                                       | 0          | 3                                          | 0.8712        | 0(0-Inf)               |
| PERICARDITIS, IDIOPATHIC                            | 0                                       | 0          | 6                                          | 4.0986        | 0(0-Inf)               |
| PERICARDITIS, NOS                                   | 1                                       | 7.9214     | 101                                        | 35.5825       | 0.2226(0.031-1.5978)   |
| PERICARDITIS, RECURRENT                             | 0                                       | 0          | 8                                          | 1.9743        | 0(0-Inf)               |
| PERICARDITIS, RHEUMATOID                            | 0                                       | 0          | 1                                          | 0.3526        | 0(0-Inf)               |
| PERICARDITIS, VIRAL                                 | 0                                       | 0          | 8                                          | 1.9789        | 0(0-Inf)               |
| PERICHONDritis, AURICLE                             | 0                                       | 0          | 6                                          | 1.4563        | 0(0-Inf)               |
| PERICORONITIS                                       | 0                                       | 0          | 32                                         | 12.1649       | 0(0-Inf)               |
| PERIDIVERTICULITIS                                  | 3                                       | 20.8989    | 25                                         | 6.3416        | 3.2955(0.9862-11.0129) |
| PERINEPHRITIS                                       | 0                                       | 0          | 1                                          | 6.4916        | 0(0-Inf)               |
| PERIODIC LEG MOVEMENTS OF SLEEP                     | 14                                      | 111.8572   | 394                                        | 140.6715      | 0.7952(0.4661-1.3566)  |
| PERIODONTAL, POCKET                                 | 1                                       | 7.1163     | 101                                        | 28.2027       | 0.2523(0.0351-1.8116)  |
| PERIODONTAL, RECHECK                                | 43                                      | 317.9678   | 1359                                       | 396.8554      | 0.8012(0.591-1.0862)   |
| PERIODONTITIS, ACUTE                                | 0                                       | 0          | 16                                         | 6.3205        | 0(0-Inf)               |
| PERIODONTITIS, APICAL                               | 2                                       | 16.1472    | 105                                        | 37.5557       | 0.43(0.1059-1.7451)    |
| PERIODONTITIS, APICAL, ACUTE                        | 1                                       | 7.3542     | 42                                         | 12.6065       | 0.5834(0.08-4.2542)    |
| PERIODONTITIS, CHRONIC                              | 49                                      | 408.9666   | 1619                                       | 605.4687      | 0.6755(0.5081-0.898)   |
| PERIODONTITIS, NOS                                  | 64                                      | 565.6253   | 1828                                       | 482.0517      | 1.1734(0.9139-1.5066)  |
| PERIODONTOSIS                                       | 0                                       | 0          | 2                                          | 0.5709        | 0(0-Inf)               |
| PERIOSTITIS, ALVEOLAR                               | 0                                       | 0          | 1                                          | 0.2354        | 0(0-Inf)               |
| PERIOSTITIS, NOS                                    | 0                                       | 0          | 10                                         | 2.419         | 0(0-Inf)               |
| PERISALPINGITIS, NOS                                | 0                                       | 0          | 1                                          | 0.8528        | 0(0-Inf)               |
| PERISTALSIS (ESOPHAGEAL) SEE ALSO DISORDER MOTILITY | 0                                       | 0          | 1                                          | 0.8877        | 0(0-Inf)               |
| PERITONITIS, ACUTE                                  | 0                                       | 0          | 9                                          | 2.6646        | 0(0-Inf)               |
| PERITONITIS, BACTERIAL SPONTANEOUS                  | 3                                       | 20.828     | 5                                          | 1.2455        | 16.7222(3.8699-72.259) |
| PERITONITIS, BILE                                   | 0                                       | 0          | 2                                          | 0.432         | 0(0-Inf)               |
| PERITONITIS, NOS                                    | 3                                       | 23.938     | 50                                         | 17.5695       | 1.3625(0.423-4.388)    |
| PERITONITIS, PELVIC, FEMALE, ACUTE                  | 0                                       | 0          | 1                                          | 0.398         | 0(0-Inf)               |
| PERITONITIS, PERFORATING                            | 0                                       | 0          | 3                                          | 0.8186        | 0(0-Inf)               |
| PERLECHE, NOS                                       | 4                                       | 29.6803    | 61                                         | 18.4258       | 1.6108(0.5829-4.451)   |
| PERNIO                                              | 1                                       | 6.966      | 10                                         | 2.7045        | 2.5757(0.3255-20.3798) |
| PERSEVERATION (INFANTILE) SPEECH                    | 0                                       | 0          | 1                                          | 0.8528        | 0(0-Inf)               |
| PERSONALITY, AGGRESSIVE                             | 1                                       | 19.7395    | 50                                         | 64.2063       | 0.3074(0.0424-2.2276)  |

| Description                            | No. of Positive Cases with Disease Code | Case Rate* | No. of Positive Controls with Disease Code | Control Rate* | Relative Risk (95%CI)    |
|----------------------------------------|-----------------------------------------|------------|--------------------------------------------|---------------|--------------------------|
| PERSONALITY, ANTISOCIAL OR SOCIOPATHIC | 0                                       | 0          | 12                                         | 3.3752        | 0(0-Inf)                 |
| PERSONALITY, AVOIDANT                  | 0                                       | 0          | 6                                          | 1.3836        | 0(0-Inf)                 |
| PERSONALITY, BORDERLINE                | 0                                       | 0          | 13                                         | 6.1235        | 0(0-Inf)                 |
| PERSONALITY, CLUSTER C TRAIT           | 0                                       | 0          | 6                                          | 2.1736        | 0(0-Inf)                 |
| PERSONALITY, COMPULSIVE                | 0                                       | 0          | 7                                          | 1.6579        | 0(0-Inf)                 |
| PERSONALITY, CYCLOTHYMIC               | 1                                       | 7.5988     | 21                                         | 5.0761        | 1.497(0.1999-11.2117)    |
| PERSONALITY, DEPENDENT                 | 0                                       | 0          | 30                                         | 8.7029        | 0(0-Inf)                 |
| PERSONALITY, EXPLOSIVE                 | 0                                       | 0          | 8                                          | 2.3029        | 0(0-Inf)                 |
| PERSONALITY, HISTRIONIC                | 1                                       | 7.2158     | 14                                         | 3.9735        | 1.816(0.236-13.976)      |
| PERSONALITY, HOSTILE                   | 0                                       | 0          | 2                                          | 0.4853        | 0(0-Inf)                 |
| PERSONALITY, HYSTERICAL                | 2                                       | 22.8373    | 20                                         | 5.3109        | 4.3001(0.9948-18.5869)   |
| PERSONALITY, IMPULSIVE                 | 0                                       | 0          | 22                                         | 6.8954        | 0(0-Inf)                 |
| PERSONALITY, INADEQUATE                | 0                                       | 0          | 4                                          | 1.1114        | 0(0-Inf)                 |
| PERSONALITY, NARCISSISTIC              | 0                                       | 0          | 13                                         | 4.0123        | 0(0-Inf)                 |
| PERSONALITY, OBSESSIVE                 | 0                                       | 0          | 21                                         | 7.8139        | 0(0-Inf)                 |
| PERSONALITY, OBSESSIVE-COMPULSIVE      | 7                                       | 49.0131    | 131                                        | 32.2002       | 1.5221(0.7094-3.2659)    |
| PERSONALITY, PARANOID                  | 0                                       | 0          | 15                                         | 4.0743        | 0(0-Inf)                 |
| PERSONALITY, PASSIVE                   | 0                                       | 0          | 1                                          | 0.398         | 0(0-Inf)                 |
| PERSONALITY, PASSIVE-AGGRESSIVE        | 2                                       | 23.9944    | 15                                         | 4.3835        | 5.4739(1.2363-24.2364)   |
| PERSONALITY, PASSIVE-DEPENDENT         | 1                                       | 13.2433    | 55                                         | 17.3024       | 0.7654(0.1056-5.5461)    |
| PERSONALITY, PSYCHOSOCIAL (DISORDER)   | 1                                       | 9.5608     | 1                                          | 0.493         | 19.3939(1.1515-326.6454) |
| PERSONALITY, SCHIZOID                  | 0                                       | 0          | 17                                         | 4.0309        | 0(0-Inf)                 |
| PERSONALITY, TYPE A                    | 0                                       | 0          | 3                                          | 0.7884        | 0(0-Inf)                 |
| PERSONALITY, TYPE B                    | 1                                       | 8.9367     | 8                                          | 3.394         | 2.6331(0.3244-21.3722)   |
| PES, CAVUS, ACQUIRED                   | 0                                       | 0          | 11                                         | 2.8119        | 0(0-Inf)                 |
| PES, CAVUS, NOS                        | 1                                       | 6.937      | 28                                         | 7.2875        | 0.9519(0.1289-7.0308)    |
| PES, PLANOVALGUS, ACQUIRED             | 2                                       | 15.8564    | 27                                         | 9.2825        | 1.7082(0.4031-7.2382)    |
| PES, PLANOVALGUS, NOS                  | 0                                       | 0          | 72                                         | 26.6335       | 0(0-Inf)                 |
| PES, PLANUS, NOS                       | 9                                       | 64.9529    | 356                                        | 101.8745      | 0.6376(0.3286-1.2371)    |
| PES, VALGUS, ACQUIRED                  | 1                                       | 7.32       | 12                                         | 3.5203        | 2.0794(0.2668-16.2031)   |
| PES, VALGUS, NOS                       | 0                                       | 0          | 9                                          | 2.3098        | 0(0-Inf)                 |
| PETECHIA, DIGESTIVE SYSTEM, NEC/NOS    | 0                                       | 0          | 13                                         | 9.8518        | 0(0-Inf)                 |
| PETECHIA, NOS                          | 5                                       | 40.3794    | 79                                         | 28.0683       | 1.4386(0.5803-3.5665)    |
| PHACODONESIS                           | 1                                       | 21.9468    | 3                                          | 4.3936        | 4.9952(0.5142-48.5255)   |
| PHANTOM LIMB (PAIN)                    | 0                                       | 0          | 6                                          | 3.0216        | 0(0-Inf)                 |
| PHARYNGITIS, ACUTE                     | 6                                       | 48.0946    | 241                                        | 58.0992       | 0.8278(0.3676-1.8642)    |
| PHARYNGITIS, BACTERIAL                 | 1                                       | 10.434     | 32                                         | 8.8235        | 1.1825(0.1608-8.6951)    |
| PHARYNGITIS, BACTERIAL, ACUTE          | 0                                       | 0          | 1                                          | 0.8528        | 0(0-Inf)                 |
| PHARYNGITIS, CHRONIC                   | 0                                       | 0          | 25                                         | 6.2568        | 0(0-Inf)                 |
| PHARYNGITIS, HEMOPHILUS                | 0                                       | 0          | 6                                          | 1.6098        | 0(0-Inf)                 |

| Description                                | No. of Positive Cases with Disease Code | Case Rate* | No. of Positive Controls with Disease Code | Control Rate* | Relative Risk (95%CI)    |
|--------------------------------------------|-----------------------------------------|------------|--------------------------------------------|---------------|--------------------------|
| PHARYNGITIS, INFECTIVE                     | 0                                       | 0          | 1                                          | 1.0359        | 0(0-Inf)                 |
| PHARYNGITIS, NOS--PHG                      | 82                                      | 634.4378   | 2576                                       | 660.8903      | 0.96(0.77-1.1968)        |
| PHARYNGITIS, SECONDARY                     | 1                                       | 7.6912     | 1                                          | 0.3293        | 23.3565(1.3833-394.3764) |
| PHARYNGITIS, SICCA                         | 0                                       | 0          | 7                                          | 1.8256        | 0(0-Inf)                 |
| PHARYNGITIS, SMOKER'S (CHRONIC)            | 0                                       | 0          | 5                                          | 2.8736        | 0(0-Inf)                 |
| PHARYNGITIS, STREPTOCOCCAL (ACUTE)--PHGS   | 20                                      | 252.0527   | 731                                        | 226.4976      | 1.1128(0.713-1.7368)     |
| PHARYNGITIS, SUBACUTE                      | 0                                       | 0          | 3                                          | 0.8456        | 0(0-Inf)                 |
| PHARYNGITIS, TOBACCO (CHRONIC)             | 0                                       | 0          | 2                                          | 0.5457        | 0(0-Inf)                 |
| PHARYNGITIS, VIRAL, ACUTE                  | 0                                       | 0          | 8                                          | 2.0743        | 0(0-Inf)                 |
| PHARYNGITIS, VIRAL--PHGV                   | 22                                      | 217.0468   | 676                                        | 180.7258      | 1.201(0.7845-1.8385)     |
| PHARYNGITIS, WITH INFLUENZA                | 0                                       | 0          | 1                                          | 0.4751        | 0(0-Inf)                 |
| PHARYNGOLARYNGITIS (ACUTE)                 | 0                                       | 0          | 6                                          | 1.7428        | 0(0-Inf)                 |
| PHARYNGOTRACHEITIS (ACUTE)                 | 0                                       | 0          | 2                                          | 0.8723        | 0(0-Inf)                 |
| PHENOMENON, KOEBNER                        | 0                                       | 0          | 1                                          | 0.2354        | 0(0-Inf)                 |
| PHENOMENON, LHERMITTE'S (EYE)              | 0                                       | 0          | 4                                          | 1.1114        | 0(0-Inf)                 |
| PHENOMENON, LHERMITTE'S (NEURO)            | 0                                       | 0          | 2                                          | 0.8096        | 0(0-Inf)                 |
| PHENOMENON, RAYNAUD'S                      | 6                                       | 42.5343    | 238                                        | 56.0615       | 0.7587(0.3368-1.709)     |
| PHENOMENON, VASOMOTOR                      | 0                                       | 0          | 1                                          | 0.398         | 0(0-Inf)                 |
| PHENOMENON, WENCKEBACH'S                   | 1                                       | 7.1109     | 5                                          | 1.5227        | 4.67(0.537-40.6157)      |
| PHEOCHROMOCYTOMA, ADRENAL#                 | 0                                       | 0          | 4                                          | 1.1114        | 0(0-Inf)                 |
| PHIMOSIS, DUE TO INFECTION                 | 0                                       | 0          | 1                                          | 1.037         | 0(0-Inf)                 |
| PHIMOSIS, NOS--PHIM                        | 6                                       | 100.4987   | 156                                        | 124.0259      | 0.8103(0.358-1.8341)     |
| PHLEBECTASIA, ESOPHAGUS, NOS               | 0                                       | 0          | 4                                          | 3.0039        | 0(0-Inf)                 |
| PHLEBECTASIA, LOWER EXTREMITY              | 0                                       | 0          | 3                                          | 0.9775        | 0(0-Inf)                 |
| PHLEBECTASIA, NOS (SEE ALSO VARICOSE VEIN) | 1                                       | 9.4737     | 2                                          | 0.9257        | 10.2346(0.894-117.1653)  |
| PHLEBITIS, AXILLARY VEIN                   | 0                                       | 0          | 1                                          | 0.398         | 0(0-Inf)                 |
| PHLEBITIS, CHEMICAL                        | 1                                       | 13.3315    | 1                                          | 0.376         | 35.4529(2.1407-587.1476) |
| PHLEBITIS, DEEP                            | 0                                       | 0          | 9                                          | 2.2208        | 0(0-Inf)                 |
| PHLEBITIS, DEEP CALF                       | 0                                       | 0          | 4                                          | 1.0711        | 0(0-Inf)                 |
| PHLEBITIS, FEMORAL                         | 0                                       | 0          | 11                                         | 2.7028        | 0(0-Inf)                 |
| PHLEBITIS, FEMORAL, SUPERFICIAL            | 0                                       | 0          | 1                                          | 0.3526        | 0(0-Inf)                 |
| PHLEBITIS, FOOT                            | 1                                       | 6.9642     | 5                                          | 1.2842        | 5.4228(0.6168-47.6794)   |
| PHLEBITIS, ILIAC VEIN                      | 0                                       | 0          | 3                                          | 1.2705        | 0(0-Inf)                 |
| PHLEBITIS, LEG, DEEP VESSELS               | 1                                       | 7.4153     | 13                                         | 3.9691        | 1.8683(0.2418-14.4365)   |
| PHLEBITIS, LEG, SUPERFICIAL                | 4                                       | 27.9667    | 82                                         | 19.799        | 1.4125(0.5156-3.8694)    |
| PHLEBITIS, LOWER EXTREMITY, DEEP VESSELS   | 0                                       | 0          | 3                                          | 0.8711        | 0(0-Inf)                 |
| PHLEBITIS, LOWER EXTREMITY, NOS            | 0                                       | 0          | 26                                         | 6.038         | 0(0-Inf)                 |
| PHLEBITIS, MIGRANS                         | 0                                       | 0          | 1                                          | 0.2354        | 0(0-Inf)                 |
| PHLEBITIS, NOS                             | 2                                       | 14.5633    | 54                                         | 16.0436       | 0.9077(0.2205-3.7372)    |
| PHLEBITIS, POPLITEAL                       | 0                                       | 0          | 9                                          | 2.5924        | 0(0-Inf)                 |



| Description                        | No. of Positive Cases with Disease Code | Case Rate* | No. of Positive Controls with Disease Code | Control Rate* | Relative Risk (95%CI)   |
|------------------------------------|-----------------------------------------|------------|--------------------------------------------|---------------|-------------------------|
| PHLEBITIS, SAPHENOUS               | 0                                       | 0          | 6                                          | 1.6824        | 0(0-Inf)                |
| PHLEBITIS, SUBCLAVIAN VEIN         | 0                                       | 0          | 1                                          | 0.4048        | 0(0-Inf)                |
| PHLEBITIS, SUPERFICIAL             | 12                                      | 85.85      | 244                                        | 66.16         | 1.2976(0.7252-2.3218)   |
| PHLEBITIS, SURAL                   | 4                                       | 29.2702    | 13                                         | 3.3287        | 8.7932(2.8293-27.3286)  |
| PHLEBITIS, UPPER EXTREMITY         | 4                                       | 28.3601    | 50                                         | 11.9252       | 2.3782(0.8536-6.6256)   |
| PHLEBITIS, VEIN, CHEST             | 1                                       | 7.6132     | 1                                          | 0.2399        | 31.7408(1.87-538.7485)  |
| PHLEBOLITH                         | 1                                       | 6.9642     | 18                                         | 4.4761        | 1.5559(0.206-11.7537)   |
| PHLEBOSCLEROSIS                    | 0                                       | 0          | 1                                          | 0.234         | 0(0-Inf)                |
| PHLEGMON (SEE ALSO ABSCESS)        | 0                                       | 0          | 2                                          | 1.1972        | 0(0-Inf)                |
| PHLYCTENULE                        | 0                                       | 0          | 7                                          | 2.1179        | 0(0-Inf)                |
| PHLYCTENULOSIS, CORNEA             | 0                                       | 0          | 2                                          | 0.5069        | 0(0-Inf)                |
| PHLYCTENULOSIS, NOS                | 0                                       | 0          | 4                                          | 1.0139        | 0(0-Inf)                |
| PHOBIA, NOS                        | 2                                       | 15.1705    | 79                                         | 18.4911       | 0.8204(0.201-3.3486)    |
| PHORIA                             | 1                                       | 10.8812    | 41                                         | 23.1498       | 0.47(0.0645-3.4256)     |
| PHOTO-AGED SKIN                    | 3                                       | 23.4153    | 145                                        | 48.9779       | 0.4781(0.1522-1.5021)   |
| PHOTODERMATITIS                    | 0                                       | 0          | 60                                         | 14.7421       | 0(0-Inf)                |
| PHOTOPHOBIA                        | 1                                       | 8.1781     | 22                                         | 8.05          | 1.0159(0.1361-7.5823)   |
| PHOTOPSIA                          | 1                                       | 7.3969     | 65                                         | 19.5928       | 0.3775(0.0523-2.7275)   |
| PHOTOSENSITIVENESS                 | 1                                       | 6.9451     | 89                                         | 21.5335       | 0.3225(0.0449-2.3187)   |
| PHRYGIAN CAP OF GALLBLADDER        | 0                                       | 0          | 2                                          | 0.4854        | 0(0-Inf)                |
| PTHIRUS PUBIS                      | 0                                       | 0          | 4                                          | 2.0952        | 0(0-Inf)                |
| PTHISICAL CORNEA                   | 0                                       | 0          | 4                                          | 3.554         | 0(0-Inf)                |
| PTHISIS, BULBI, NOS                | 0                                       | 0          | 7                                          | 2.8666        | 0(0-Inf)                |
| PTHISIS, BULBI, TRAUMATIC          | 0                                       | 0          | 1                                          | 2.4858        | 0(0-Inf)                |
| PTHISIS, EYEBALL (INFECTION)       | 1                                       | 10.866     | 7                                          | 3.9419        | 2.7565(0.3349-22.6867)  |
| PHYCOMYCOSIS                       | 0                                       | 0          | 1                                          | 0.3526        | 0(0-Inf)                |
| PHYSIOLOGICAL CUP OF OPTIC PAPILLA | 1                                       | 7.2214     | 2                                          | 0.4642        | 15.5553(1.342-180.3021) |
| PHYTOBEZOAR, NOS                   | 0                                       | 0          | 1                                          | 0.3526        | 0(0-Inf)                |
| PHYTOBEZOAR, STOMACH               | 0                                       | 0          | 1                                          | 0.234         | 0(0-Inf)                |
| PHYTOPHOTODERMATITIS               | 0                                       | 0          | 3                                          | 0.9164        | 0(0-Inf)                |
| PICA                               | 0                                       | 0          | 1                                          | 0.398         | 0(0-Inf)                |
| PIERCED, EARS                      | 7                                       | 175.706    | 289                                        | 159.0791      | 1.1045(0.5212-2.3407)   |
| PIGMENTATION, CORNEA, ANTERIOR     | 0                                       | 0          | 2                                          | 0.5709        | 0(0-Inf)                |
| PIGMENTATION, EYE                  | 7                                       | 56.1034    | 199                                        | 69.4461       | 0.8079(0.3795-1.7199)   |
| PIGMENTATION, MACULA               | 1                                       | 7.9943     | 45                                         | 15.7915       | 0.5062(0.0696-3.6842)   |
| PIGMENTATION, RETINA CONGENITAL    | 0                                       | 0          | 8                                          | 1.9115        | 0(0-Inf)                |
| PIGMENTATION, SKIN                 | 9                                       | 62.9053    | 162                                        | 40.4459       | 1.5553(0.7926-3.052)    |
| PILOMATRIXOMA                      | 1                                       | 8.0507     | 17                                         | 6.0651        | 1.3274(0.1753-10.0497)  |
| PIMPLE                             | 0                                       | 0          | 12                                         | 3.0047        | 0(0-Inf)                |
| PINGUECULA                         | 2                                       | 14.9352    | 124                                        | 29.5801       | 0.5049(0.1247-2.045)    |

| Description                                      | No. of Positive Cases with Disease Code | Case Rate* | No. of Positive Controls with Disease Code | Control Rate* | Relative Risk (95%CI)   |
|--------------------------------------------------|-----------------------------------------|------------|--------------------------------------------|---------------|-------------------------|
| PINK EYE                                         | 0                                       | 0          | 3                                          | 0.6986        | 0(0-Inf)                |
| PINWORMS                                         | 0                                       | 0          | 3                                          | 0.8457        | 0(0-Inf)                |
| PITTING, NAIL                                    | 0                                       | 0          | 3                                          | 0.7175        | 0(0-Inf)                |
| PITTING, NOS (EDEMA)                             | 3                                       | 31.6708    | 28                                         | 15.2332       | 2.0791(0.6281-6.8816)   |
| PITYRIASIS, ALBA                                 | 0                                       | 0          | 1                                          | 1.0363        | 0(0-Inf)                |
| PITYRIASIS, CAPITIS                              | 0                                       | 0          | 1                                          | 1.0363        | 0(0-Inf)                |
| PITYRIASIS, LICHENOIDES CHRONICA                 | 0                                       | 0          | 2                                          | 0.5908        | 0(0-Inf)                |
| PITYRIASIS, LICHENOIDES ET VARIOLIFORMIS         | 0                                       | 0          | 2                                          | 0.432         | 0(0-Inf)                |
| PITYRIASIS, LICHENOIDES, NOS                     | 1                                       | 8.104      | 3                                          | 1.081         | 7.4966(0.7559-74.3429)  |
| PITYRIASIS, NOS                                  | 1                                       | 7.5558     | 3                                          | 0.9368        | 8.0654(0.809-80.407)    |
| PITYRIASIS, ROSEA                                | 2                                       | 24.7933    | 113                                        | 34.2706       | 0.7235(0.1784-2.9337)   |
| PITYRIASIS, RUBRA PILARIS                        | 0                                       | 0          | 5                                          | 1.2296        | 0(0-Inf)                |
| PITYRIASIS, VERSICOLOR                           | 0                                       | 0          | 2                                          | 0.5069        | 0(0-Inf)                |
| PLACEMENT GASTROSTOMY FEEDING TUBE               | 9                                       | 114.8307   | 179                                        | 125.9001      | 0.9121(0.4662-1.7842)   |
| PLACENTA, ABRUPTIO, WITH PREGNANCY               | 0                                       | 0          | 1                                          | 0.8274        | 0(0-Inf)                |
| PLACENTA, ACCRETA, COMPLICATING DELIVERY         | 0                                       | 0          | 1                                          | 0.234         | 0(0-Inf)                |
| PLACENTA, PREVIA, PARTIAL, COMPLICATING DELIVERY | 0                                       | 0          | 2                                          | 0.7964        | 0(0-Inf)                |
| PLACENTA, RETAINED, COMPLICATING PUERPERIUM      | 0                                       | 0          | 2                                          | 1.6544        | 0(0-Inf)                |
| PLAGUE, NOS                                      | 0                                       | 0          | 1                                          | 0.3526        | 0(0-Inf)                |
| PLAQUE, CERVIX                                   | 0                                       | 0          | 1                                          | 0.8528        | 0(0-Inf)                |
| PLAQUE, DENTAL                                   | 0                                       | 0          | 8                                          | 3.7811        | 0(0-Inf)                |
| PLAQUE, HOLLENHORST, EMBOLI RETINA               | 0                                       | 0          | 10                                         | 4.9603        | 0(0-Inf)                |
| PLAQUE, PENIS                                    | 0                                       | 0          | 4                                          | 1.0588        | 0(0-Inf)                |
| PLAQUE, PLEURA, SEE ALSO CALCIFICATION           | 0                                       | 0          | 73                                         | 37.2387       | 0(0-Inf)                |
| PLAQUE, TONGUE                                   | 0                                       | 0          | 1                                          | 0.234         | 0(0-Inf)                |
| PLASMACYTOMA-SEE ALSO MYELOMA                    | 2                                       | 14.6481    | 4                                          | 1.2247        | 11.9604(2.1321-67.0941) |
| PLASMACYTOSIS                                    | 2                                       | 14.9489    | 6                                          | 1.8543        | 8.0618(1.5873-40.9445)  |
| PLATEAU (IRIS)                                   | 0                                       | 0          | 7                                          | 1.794         | 0(0-Inf)                |
| PLATYBASIA                                       | 0                                       | 0          | 1                                          | 0.3526        | 0(0-Inf)                |
| PLEOCYTOSIS (CSF)                                | 0                                       | 0          | 2                                          | 1.1974        | 0(0-Inf)                |
| Plesiomonas shigelloides                         | 0                                       | 0          | 1                                          | 0.2729        | 0(0-Inf)                |
| PLETHORA                                         | 0                                       | 0          | 1                                          | 0.8877        | 0(0-Inf)                |
| PLEURISY, NOS, SEE ALSO PLEURITIS                | 9                                       | 62.986     | 137                                        | 34.5709       | 1.8219(0.9251-3.5884)   |
| PLEURISY, TUBERCULOUS                            | 0                                       | 0          | 1                                          | 2.4924        | 0(0-Inf)                |
| PLEURITIS, ACUTE                                 | 0                                       | 0          | 7                                          | 2.0188        | 0(0-Inf)                |
| PLEURITIS, FIBROUS                               | 0                                       | 0          | 2                                          | 1.7763        | 0(0-Inf)                |
| PLEURITIS, NOS                                   | 3                                       | 20.954     | 83                                         | 20.7888       | 1.0079(0.3176-3.1992)   |
| PLEURODESIS WITHOUT DIAGNOSIS SPECIFIED          | 1                                       | 8.8297     | 12                                         | 4.9626        | 1.7792(0.229-13.8234)   |
| PLEURODYNIA, EPIDEMIC                            | 0                                       | 0          | 1                                          | 0.4751        | 0(0-Inf)                |
| PLEURODYNIA, NOS                                 | 1                                       | 9.9769     | 55                                         | 14.6706       | 0.6801(0.0938-4.9283)   |

| Description                                                          | No. of Positive<br>Cases with<br>Disease Code | Case<br>Rate* | No. of Positive<br>Controls with<br>Disease Code | Control<br>Rate* | Relative Risk (95%CI)   |
|----------------------------------------------------------------------|-----------------------------------------------|---------------|--------------------------------------------------|------------------|-------------------------|
| PLEUROPERICARDITIS, NOS                                              | 0                                             | 0             | 9                                                | 2.6285           | 0(0-Inf)                |
| PLEXITIS, BRACHIAL                                                   | 0                                             | 0             | 3                                                | 0.6549           | 0(0-Inf)                |
| PLEXOPATHY, BRACHIAL                                                 | 3                                             | 20.8702       | 59                                               | 15.1736          | 1.3754(0.4293-4.407)    |
| PLEXOPATHY, LUMBOSACRAL                                              | 1                                             | 9.0606        | 5                                                | 2.1551           | 4.2042(0.4809-36.7533)  |
| PLEXOPATHY, NOS, SEE ALSO NEUROPATHY                                 | 1                                             | 8.2932        | 8                                                | 3.0066           | 2.7584(0.3402-22.3677)  |
| PLEXOPATHY, TRACTION POST-TRAUMATIC                                  | 0                                             | 0             | 1                                                | 0.2729           | 0(0-Inf)                |
| PLICA, KNEE (SUPRAPATELLAR)                                          | 0                                             | 0             | 48                                               | 12.0442          | 0(0-Inf)                |
| PLICA, SYNOVIAL                                                      | 0                                             | 0             | 9                                                | 2.6212           | 0(0-Inf)                |
| PMS (PREMENSTRUAL SYNDROME)                                          | 0                                             | 0             | 2                                                | 0.7961           | 0(0-Inf)                |
| PNEUMATOCELE                                                         | 0                                             | 0             | 1                                                | 1.0362           | 0(0-Inf)                |
| PNEUMATOSIS, CYSTOIDES INTESTINALIS (SEE ALSO<br>PNEUMOINTESTINALIS) | 0                                             | 0             | 1                                                | 0.234            | 0(0-Inf)                |
| PNEUMATURIA                                                          | 0                                             | 0             | 5                                                | 2.276            | 0(0-Inf)                |
| PNEUMOCEPHALUS                                                       | 0                                             | 0             | 2                                                | 1.7758           | 0(0-Inf)                |
| PNEUMOCYSTOSIS                                                       | 0                                             | 0             | 1                                                | 0.4049           | 0(0-Inf)                |
| PNEUMOINTESTINALIS (SEE ALSO PNEUMATOSIS)                            | 0                                             | 0             | 2                                                | 1.8977           | 0(0-Inf)                |
| PNEUMOMEDIASTINUM, NOS                                               | 0                                             | 0             | 6                                                | 2.0978           | 0(0-Inf)                |
| PNEUMONIA, ACUTE, NOS                                                | 0                                             | 0             | 40                                               | 23.5351          | 0(0-Inf)                |
| PNEUMONIA, ASPIRATION                                                | 20                                            | 371.4665      | 379                                              | 448.3621         | 0.8285(0.5281-1.2999)   |
| PNEUMONIA, ATYPICAL                                                  | 1                                             | 7.0916        | 47                                               | 13.1905          | 0.5376(0.0739-3.9091)   |
| PNEUMONIA, BACILLUS                                                  | 0                                             | 0             | 1                                                | 0.398            | 0(0-Inf)                |
| PNEUMONIA, BACTERIAL (PSEUDOMONAS)                                   | 3                                             | 28.9926       | 32                                               | 15.1962          | 1.9079(0.5808-6.2671)   |
| PNEUMONIA, BRANHAMELLA CATARRHALIS                                   | 1                                             | 24.8763       | 0                                                | 0                | 38514105062.5615(0-Inf) |
| PNEUMONIA, BRONCHIAL, SEE ALSO BRONCHOPNEUMONIA                      | 0                                             | 0             | 4                                                | 2.9176           | 0(0-Inf)                |
| PNEUMONIA, CHLAMYDIA                                                 | 0                                             | 0             | 1                                                | 0.8528           | 0(0-Inf)                |
| PNEUMONIA, CHRONIC, SEE ALSO FIBROSIS LUNG                           | 0                                             | 0             | 3                                                | 2.8213           | 0(0-Inf)                |
| PNEUMONIA, COCCIDIOMYCOSIS, CODE ALSO<br>COCCIDIOIDOMYCOSIS          | 0                                             | 0             | 2                                                | 0.7052           | 0(0-Inf)                |
| PNEUMONIA, CYTOMEGALIC-CODE ALSO VIRUS CYTOMEGALIC<br>INCLUSION      | 0                                             | 0             | 1                                                | 0.234            | 0(0-Inf)                |
| PNEUMONIA, DIPLOCOCCAL                                               | 0                                             | 0             | 1                                                | 0.234            | 0(0-Inf)                |
| PNEUMONIA, E. COLI                                                   | 0                                             | 0             | 3                                                | 0.9609           | 0(0-Inf)                |
| PNEUMONIA, EOSINOPHILIC                                              | 0                                             | 0             | 1                                                | 0.8878           | 0(0-Inf)                |
| PNEUMONIA, FRIEDLANDER'S BACILLUS                                    | 0                                             | 0             | 1                                                | 0.234            | 0(0-Inf)                |
| PNEUMONIA, FUNGAL                                                    | 0                                             | 0             | 1                                                | 0.3526           | 0(0-Inf)                |
| PNEUMONIA, HEMOPHILUS INFLUENZAE                                     | 4                                             | 31.8905       | 58                                               | 20.1107          | 1.5857(0.573-4.3884)    |
| PNEUMONIA, INFLUENZAL, CODE ALSO INFLUENZA                           | 2                                             | 16.36         | 5                                                | 1.82             | 8.9888(1.6979-47.5864)  |
| PNEUMONIA, INTERSTITIAL, (CHRONIC) SEE ALSO FIBROSIS, LUNG           | 0                                             | 0             | 4                                                | 0.9157           | 0(0-Inf)                |
| PNEUMONIA, INTERSTITIAL, CHRONIC, WITH FIBROSIS LUNG                 | 0                                             | 0             | 1                                                | 0.3526           | 0(0-Inf)                |

| Description                                                          | No. of Positive Cases with Disease Code | Case Rate* | No. of Positive Controls with Disease Code | Control Rate* | Relative Risk (95%CI)    |
|----------------------------------------------------------------------|-----------------------------------------|------------|--------------------------------------------|---------------|--------------------------|
| PNEUMONIA, INTERSTITIAL, LYMPHOID                                    | 0                                       | 0          | 1                                          | 0.4048        | 0(0-Inf)                 |
| PNEUMONIA, INTERSTITIAL, NOS                                         | 1                                       | 11.7361    | 18                                         | 11.3214       | 1.0366(0.1377-7.8058)    |
| PNEUMONIA, KLEBSIELLA                                                | 1                                       | 8.5789     | 13                                         | 5.1533        | 1.6647(0.2156-12.8568)   |
| PNEUMONIA, LEGIONNAIRES'                                             | 0                                       | 0          | 2                                          | 0.5475        | 0(0-Inf)                 |
| PNEUMONIA, LIPOID                                                    | 0                                       | 0          | 1                                          | 0.2354        | 0(0-Inf)                 |
| PNEUMONIA, LOBAR, NOS                                                | 1                                       | 8.5318     | 17                                         | 6.6374        | 1.2854(0.1698-9.7302)    |
| PNEUMONIA, LOBAR, STREPTOCOCCAL                                      | 0                                       | 0          | 1                                          | 0.2355        | 0(0-Inf)                 |
| PNEUMONIA, MORAXELLA                                                 | 1                                       | 10.5629    | 3                                          | 1.6556        | 6.3799(0.646-63.0058)    |
| PNEUMONIA, MYCOPLASMA                                                | 0                                       | 0          | 38                                         | 16.1043       | 0(0-Inf)                 |
| PNEUMONIA, NECROTIC                                                  | 0                                       | 0          | 1                                          | 0.8877        | 0(0-Inf)                 |
| PNEUMONIA, NOCARDIA                                                  | 0                                       | 0          | 1                                          | 0.8877        | 0(0-Inf)                 |
| PNEUMONIA, NOS                                                       | 160                                     | 1772.779   | 3137                                       | 1726.1491     | 1.027(0.8757-1.2044)     |
| PNEUMONIA, ORGANIZING                                                | 2                                       | 19.1421    | 38                                         | 17.8706       | 1.0712(0.2574-4.4572)    |
| PNEUMONIA, PATCHY, SEE ALSO BRONCHOPNEUMONIA                         | 0                                       | 0          | 3                                          | 0.6986        | 0(0-Inf)                 |
| PNEUMONIA, PNEUMOCOCCAL, ACUTE OR NOS                                | 4                                       | 30.7876    | 61                                         | 20.0202       | 1.5378(0.5567-4.248)     |
| PNEUMONIA, PNEUMOCYSTIS CARINII                                      | 0                                       | 0          | 4                                          | 1.3629        | 0(0-Inf)                 |
| PNEUMONIA, POST-OPERATIVE, CODE ALSO COMPLICATION SURGICAL PROCEDURE | 1                                       | 11.4126    | 9                                          | 5.4302        | 2.1017(0.2639-16.7367)   |
| PNEUMONIA, PRIMARY ATYPICAL                                          | 0                                       | 0          | 1                                          | 0.234         | 0(0-Inf)                 |
| PNEUMONIA, PROTEUS                                                   | 1                                       | 11.2105    | 0                                          | 0             | 7455366847.5626(0-Inf)   |
| PNEUMONIA, SPECIFIED ORGANISM, NEC                                   | 0                                       | 0          | 2                                          | 1.0782        | 0(0-Inf)                 |
| PNEUMONIA, STAPHYLOCOCCAL                                            | 0                                       | 0          | 23                                         | 19.3108       | 0(0-Inf)                 |
| PNEUMONIA, STREPTOCOCCAL                                             | 2                                       | 16.2604    | 44                                         | 15.914        | 1.0218(0.2467-4.2323)    |
| PNEUMONIA, VIRAL, NOS                                                | 3                                       | 20.9357    | 40                                         | 10.2091       | 2.0507(0.6301-6.6742)    |
| PNEUMONITIS, ACUTE                                                   | 0                                       | 0          | 21                                         | 8.1897        | 0(0-Inf)                 |
| PNEUMONITIS, ASPIRATION                                              | 1                                       | 13.5996    | 51                                         | 39.3285       | 0.3458(0.0477-2.5064)    |
| PNEUMONITIS, CHEMICAL                                                | 1                                       | 13.4488    | 1                                          | 0.7522        | 17.8793(1.0881-293.7781) |
| PNEUMONITIS, CHRONIC                                                 | 0                                       | 0          | 13                                         | 5.1678        | 0(0-Inf)                 |
| PNEUMONITIS, GRANULOMATOUS                                           | 0                                       | 0          | 1                                          | 0.398         | 0(0-Inf)                 |
| PNEUMONITIS, HYPERSENSITIVITY                                        | 0                                       | 0          | 11                                         | 3.058         | 0(0-Inf)                 |
| PNEUMONITIS, INTERSTITIAL LYMPHOCYTIC                                | 0                                       | 0          | 1                                          | 0.4048        | 0(0-Inf)                 |
| PNEUMONITIS, INTERSTITIAL, (CHRONIC) WITH FIBROSIS LUNG              | 1                                       | 8.6003     | 12                                         | 4.7929        | 1.7944(0.2312-13.9292)   |
| PNEUMONITIS, INTERSTITIAL, NOS                                       | 2                                       | 18.1851    | 25                                         | 10.8306       | 1.679(0.3951-7.1351)     |
| PNEUMONITIS, LINGULAR                                                | 3                                       | 21.1796    | 35                                         | 8.2539        | 2.566(0.7829-8.4099)     |
| PNEUMONITIS, LIPOID                                                  | 0                                       | 0          | 1                                          | 0.234         | 0(0-Inf)                 |
| PNEUMONITIS, NOS, SEE ALSO PNEUMONIA                                 | 59                                      | 460.235    | 1117                                       | 349.4831      | 1.3169(1.0125-1.7128)    |
| PNEUMONITIS, OBSTRUCTIVE                                             | 1                                       | 7.9303     | 15                                         | 5.2305        | 1.5162(0.1986-11.5741)   |
| PNEUMONITIS, RADIATION, CODE ALSO EFFECT ADVERSE RADIATION           | 0                                       | 0          | 11                                         | 7.9845        | 0(0-Inf)                 |
| PNEUMONITIS, SECONDARY                                               | 0                                       | 0          | 4                                          | 2.985         | 0(0-Inf)                 |

| Description                                            | No. of Positive Cases with Disease Code | Case Rate* | No. of Positive Controls with Disease Code | Control Rate* | Relative Risk (95%CI)  |
|--------------------------------------------------------|-----------------------------------------|------------|--------------------------------------------|---------------|------------------------|
| PNEUMONITIS, UREMIC                                    | 0                                       | 0          | 1                                          | 0.8529        | 0(0-Inf)               |
| PNEUMOPERICARDITIS, NOS                                | 0                                       | 0          | 1                                          | 0.4751        | 0(0-Inf)               |
| PNEUMOPERICARDITIS, TRAUMATIC                          | 0                                       | 0          | 1                                          | 0.398         | 0(0-Inf)               |
| PNEUMOPERITONEUM                                       | 1                                       | 12.7469    | 8                                          | 5.8887        | 2.1646(0.268-17.4847)  |
| PNEUMOTHORAX, DUE TO OPERATIVE INJURY OF CHEST WALL    | 0                                       | 0          | 14                                         | 8.8755        | 0(0-Inf)               |
| PNEUMOTHORAX, DUE TO TRAUMA                            | 0                                       | 0          | 5                                          | 2.0042        | 0(0-Inf)               |
| PNEUMOTHORAX, NOS                                      | 3                                       | 27.6543    | 67                                         | 29.6464       | 0.9328(0.2925-2.9743)  |
| PNEUMOTHORAX, SPONTANEOUS                              | 0                                       | 0          | 22                                         | 6.0212        | 0(0-Inf)               |
| PNEUMOTHORAX, TENSION                                  | 0                                       | 0          | 2                                          | 1.7753        | 0(0-Inf)               |
| PNEUMOTHORAX, TRAUMATIC                                | 0                                       | 0          | 52                                         | 13.7158       | 0(0-Inf)               |
| PNEUMOTHORAX, TRAUMATIC, LATE EFFECT                   | 0                                       | 0          | 3                                          | 1.3475        | 0(0-Inf)               |
| PODAGRA                                                | 7                                       | 55.496     | 180                                        | 64.0707       | 0.8662(0.4064-1.8462)  |
| POIKILODERMA, CIVATTE'S                                | 1                                       | 9.6526     | 43                                         | 10.3457       | 0.933(0.128-6.8032)    |
| POIKILODERMA, NOS                                      | 1                                       | 6.9397     | 10                                         | 2.4799        | 2.7984(0.3531-22.178)  |
| POIKILODERMATOMYOSITIS                                 | 0                                       | 0          | 2                                          | 0.4709        | 0(0-Inf)               |
| POISON IVY                                             | 1                                       | 9.0289     | 90                                         | 23.7449       | 0.3802(0.0529-2.7337)  |
| POISONING, CARBON MONOXIDE                             | 3                                       | 24.8153    | 24                                         | 6.197         | 4.0044(1.1949-13.4195) |
| POISONING, DRUG, NOS, SEE ALSO EFFECT, ADVERSE BY DRUG | 0                                       | 0          | 1                                          | 0.8877        | 0(0-Inf)               |
| POISONING, FOOD, NOS                                   | 0                                       | 0          | 9                                          | 2.4205        | 0(0-Inf)               |
| POLIOMYELITIS, ACUTE, BULBAR                           | 0                                       | 0          | 2                                          | 0.5837        | 0(0-Inf)               |
| POLIOMYELITIS, LATE EFFECT OF                          | 3                                       | 21.7771    | 112                                        | 27.0518       | 0.805(0.2551-2.5403)   |
| POLLAKIURIA                                            | 0                                       | 0          | 1                                          | 0.2729        | 0(0-Inf)               |
| POLLINOSIS                                             | 0                                       | 0          | 23                                         | 5.6982        | 0(0-Inf)               |
| POLLUTION, NOISE                                       | 0                                       | 0          | 2                                          | 0.5709        | 0(0-Inf)               |
| POLYANGIITIS                                           | 0                                       | 0          | 6                                          | 2.0358        | 0(0-Inf)               |
| POLYARTERITIS, NODOSA                                  | 0                                       | 0          | 7                                          | 1.6654        | 0(0-Inf)               |
| POLYARTERITIS, NOS                                     | 0                                       | 0          | 6                                          | 3.1069        | 0(0-Inf)               |
| POLYARTHRALGIA                                         | 3                                       | 21.0442    | 87                                         | 20.3467       | 1.0343(0.326-3.2812)   |
| POLYARTHRITIS, ACUTE                                   | 0                                       | 0          | 11                                         | 6.5104        | 0(0-Inf)               |
| POLYARTHRITIS, NOS (SEE ALSO ARTHRITIS)                | 6                                       | 45.787     | 197                                        | 62.9834       | 0.727(0.3221-1.6409)   |
| POLYARTHRITIS, SERONEGATIVE                            | 2                                       | 15.8456    | 47                                         | 16.1851       | 0.979(0.2368-4.0481)   |
| POLYARTHROPATHY (SEE ALSO POLYARTHRITIS)               | 0                                       | 0          | 9                                          | 3.1305        | 0(0-Inf)               |
| POLYCHONDRIITIS, NOS                                   | 0                                       | 0          | 8                                          | 1.7968        | 0(0-Inf)               |
| POLYCHONDRIITIS, RELAPSING                             | 0                                       | 0          | 9                                          | 2.1395        | 0(0-Inf)               |
| POLYCYSTIC, KIDNEY                                     | 0                                       | 0          | 17                                         | 4.4932        | 0(0-Inf)               |
| POLYCYSTIC, LIVER                                      | 0                                       | 0          | 7                                          | 1.662         | 0(0-Inf)               |
| POLYCYSTIC, OVARY                                      | 0                                       | 0          | 1                                          | 0.827         | 0(0-Inf)               |
| POLYCYTHEMIA, CHRONIC                                  | 0                                       | 0          | 1                                          | 0.2729        | 0(0-Inf)               |
| POLYCYTHEMIA, NOS                                      | 2                                       | 15.892     | 56                                         | 19.6618       | 0.8083(0.1966-3.3224)  |
| POLYCYTHEMIA, RUBRA                                    | 0                                       | 0          | 17                                         | 7.6871        | 0(0-Inf)               |

| Description                                                         | No. of Positive Cases with Disease Code | Case Rate* | No. of Positive Controls with Disease Code | Control Rate* | Relative Risk (95%CI)   |
|---------------------------------------------------------------------|-----------------------------------------|------------|--------------------------------------------|---------------|-------------------------|
| POLYCYTHEMIA, SECONDARY                                             | 1                                       | 7.5836     | 25                                         | 8.2077        | 0.924(0.1246-6.8528)    |
| POLYCYTHEMIA, VERA                                                  | 3                                       | 27.5868    | 38                                         | 16.7077       | 1.6511(0.5071-5.3763)   |
| POLYDIPSIA                                                          | 2                                       | 14.7297    | 49                                         | 14.5635       | 1.0114(0.2449-4.1778)   |
| POLYENDOCRINOPATHY (FAMILIAL)                                       | 0                                       | 0          | 1                                          | 0.234         | 0(0-Inf)                |
| POLYMENORRHEA                                                       | 0                                       | 0          | 23                                         | 15.9016       | 0(0-Inf)                |
| POLYMYALGIA, ARTERITICA                                             | 0                                       | 0          | 1                                          | 0.8528        | 0(0-Inf)                |
| POLYMYALGIA, NOS, SEE ALSO MYALGIA                                  | 3                                       | 36.3515    | 26                                         | 17.7774       | 2.0448(0.6153-6.7955)   |
| POLYMYALGIA, RHEUMATICA--PMR                                        | 22                                      | 224.1501   | 358                                        | 179.9735      | 1.2455(0.8085-1.9185)   |
| POLYMYOSITIS                                                        | 1                                       | 9.6831     | 9                                          | 4.4231        | 2.1892(0.2738-17.5015)  |
| POLYNEURITIS, NOS                                                   | 1                                       | 12.3512    | 1                                          | 0.7551        | 16.356(0.9863-271.2309) |
| POLYNEUROPATHY, DISTAL                                              | 0                                       | 0          | 2                                          | 0.432         | 0(0-Inf)                |
| POLYNEUROPATHY, NOS                                                 | 7                                       | 61.5029    | 55                                         | 22.6297       | 2.7178(1.2313-5.9988)   |
| POLYNEUROPATHY, SENSORY                                             | 0                                       | 0          | 12                                         | 5.0549        | 0(0-Inf)                |
| POLYOPIA                                                            | 0                                       | 0          | 2                                          | 0.4854        | 0(0-Inf)                |
| POLYP, ADENOMATOUS, NEC, CODE ALSO POLYP FOR SITES OTHER THAN COLON | 1                                       | 7.3412     | 19                                         | 5.7695        | 1.2724(0.1691-9.5734)   |
| POLYP, ADENOMATOUS, NOS, SEE ALSO ADENOMA                           | 2                                       | 19.1711    | 25                                         | 11.7303       | 1.6343(0.3848-6.9409)   |
| POLYP, CERVIX                                                       | 12                                      | 259.6055   | 582                                        | 294.785       | 0.8807(0.4967-1.5614)   |
| POLYP, CERVIX, NON-NEOPLASTIC                                       | 0                                       | 0          | 4                                          | 1.0402        | 0(0-Inf)                |
| POLYP, CHOANAL                                                      | 1                                       | 7.0766     | 5                                          | 1.1746        | 6.0249(0.6847-53.0144)  |
| POLYP, CHOLESTEROL                                                  | 1                                       | 9.0785     | 32                                         | 8.0939        | 1.1216(0.1525-8.2516)   |
| POLYP, COLORECTAL                                                   | 2                                       | 15.5371    | 62                                         | 21.1429       | 0.7349(0.1793-3.0126)   |
| POLYP, DENTAL                                                       | 0                                       | 0          | 1                                          | 0.2729        | 0(0-Inf)                |
| POLYP, EAR                                                          | 0                                       | 0          | 5                                          | 1.2369        | 0(0-Inf)                |
| POLYP, ENDOMETRIUM                                                  | 13                                      | 219.1018   | 551                                        | 249.7466      | 0.8773(0.5055-1.5224)   |
| POLYP, FUNDUS (UTERINE)                                             | 0                                       | 0          | 2                                          | 2.5434        | 0(0-Inf)                |
| POLYP, GALLBLADDER                                                  | 3                                       | 21.2594    | 36                                         | 8.3141        | 2.557(0.7811-8.3704)    |
| POLYP, GENITAL, FEMALE, NEC                                         | 0                                       | 0          | 2                                          | 0.5837        | 0(0-Inf)                |
| POLYP, GUM                                                          | 0                                       | 0          | 1                                          | 0.2729        | 0(0-Inf)                |
| POLYP, INTESTINE, LARGE                                             | 130                                     | 1168.743   | 3289                                       | 1281.6764     | 0.9119(0.7649-1.0871)   |
| POLYP, INTESTINE, SMALL (ILEUM)(JEJUNUM)(DUODENUM)                  | 1                                       | 7.6338     | 61                                         | 19.7527       | 0.3865(0.0534-2.7946)   |
| POLYP, LARYNX                                                       | 0                                       | 0          | 13                                         | 3.063         | 0(0-Inf)                |
| POLYP, LYMPHOID, BENIGN                                             | 0                                       | 0          | 1                                          | 0.2354        | 0(0-Inf)                |
| POLYP, MALIGNANT, CODE ALSO NEOPLASM, MALIGNANT BY SITE             | 0                                       | 0          | 44                                         | 15.8695       | 0(0-Inf)                |
| POLYP, MIDDLE EAR                                                   | 0                                       | 0          | 2                                          | 0.5069        | 0(0-Inf)                |
| POLYP, MYXOMATOUS/MYXOID, CODE ALSO POLYP BY SITE                   | 2                                       | 17.001     | 50                                         | 12.478        | 1.3625(0.33-5.6245)     |
| POLYP, NASAL CAVITY OR SEPTUM                                       | 6                                       | 43.4337    | 332                                        | 83.5676       | 0.5197(0.2316-1.1665)   |
| POLYP, NEC/NOS, CODE ALSO NEO BENIGN BY SITE                        | 12                                      | 91.4541    | 222                                        | 71.6327       | 1.2767(0.7127-2.2872)   |
| POLYP, OBSTRUCTING, CODE ALSO POLYP AND OBSTRUCTION BY SITE STATED  | 0                                       | 0          | 1                                          | 0.2729        | 0(0-Inf)                |

| Description                                                      | No. of Positive Cases with Disease Code | Case Rate* | No. of Positive Controls with Disease Code | Control Rate* | Relative Risk (95%CI)    |
|------------------------------------------------------------------|-----------------------------------------|------------|--------------------------------------------|---------------|--------------------------|
| POLYP, OVARY                                                     | 0                                       | 0          | 1                                          | 0.234         | 0(0-Inf)                 |
| POLYP, PROSTATE                                                  | 0                                       | 0          | 2                                          | 0.5475        | 0(0-Inf)                 |
| POLYP, RECTOSIGMOID                                              | 8                                       | 60.112     | 232                                        | 73.3959       | 0.819(0.4041-1.66)       |
| POLYP, RECTUM                                                    | 40                                      | 299.5505   | 1152                                       | 350.5363      | 0.8545(0.623-1.1721)     |
| POLYP, SIGMOID                                                   | 19                                      | 150.4464   | 800                                        | 279.5004      | 0.5383(0.3413-0.849)     |
| POLYP, SINUS                                                     | 0                                       | 0          | 23                                         | 6.1198        | 0(0-Inf)                 |
| POLYP, STOMACH                                                   | 15                                      | 121.4796   | 286                                        | 101.2193      | 1.2002(0.7128-2.0208)    |
| POLYP, UTERUS                                                    | 1                                       | 14.5418    | 18                                         | 7.8123        | 1.8614(0.2459-14.0909)   |
| POLYP, VAGINA                                                    | 2                                       | 28.3975    | 35                                         | 15.4276       | 1.8407(0.4393-7.7126)    |
| POLYP, VOCAL CORD                                                | 4                                       | 32.0342    | 117                                        | 27.9158       | 1.1475(0.4224-3.1177)    |
| POLYP, VULVA                                                     | 0                                       | 0          | 4                                          | 0.9363        | 0(0-Inf)                 |
| POLYPHAGIA                                                       | 0                                       | 0          | 6                                          | 1.3706        | 0(0-Inf)                 |
| POLYPHARMACY NOS (SEE ALSO OVER-TREATMENT)                       | 6                                       | 75.6336    | 59                                         | 42.4065       | 1.7835(0.7673-4.1455)    |
| POLYPOSIS, FAMILIAL (COLON)                                      | 0                                       | 0          | 8                                          | 2.7463        | 0(0-Inf)                 |
| POLYPOSIS, NASAL                                                 | 3                                       | 21.8327    | 92                                         | 27.8812       | 0.7831(0.2474-2.4788)    |
| POLYRADICULITIS                                                  | 1                                       | 7.0092     | 23                                         | 6.3973        | 1.0956(0.1471-8.1606)    |
| POLYRADICULONEUROPATHY, ACUTE                                    | 0                                       | 0          | 2                                          | 0.7896        | 0(0-Inf)                 |
| POLYRADICULONEUROPATHY, CHRONIC INFLAMMATORY DEMYELINATING--CIDP | 2                                       | 14.9368    | 8                                          | 2.5214        | 5.924(1.2355-28.404)     |
| POLYRADICULONEUROPATHY, NOS                                      | 3                                       | 29.8644    | 42                                         | 20.8684       | 1.4311(0.4417-4.6365)    |
| POLYRADICULONEUROPATHY, SENSORY/MOTOR                            | 1                                       | 21.0331    | 1                                          | 1.3162        | 15.9799(0.9817-260.1226) |
| POLYRADICULOPATHY                                                | 4                                       | 42.6486    | 58                                         | 31.7146       | 1.3448(0.4866-3.7165)    |
| POLYSEROSITIS, NOS (PERITONEAL)                                  | 0                                       | 0          | 1                                          | 0.8272        | 0(0-Inf)                 |
| POLYURIA                                                         | 2                                       | 15.4882    | 78                                         | 26.0409       | 0.5948(0.1458-2.4264)    |
| POMPHOLYX                                                        | 1                                       | 7.1537     | 3                                          | 0.8874        | 8.0618(0.8146-79.7857)   |
| POOR PERSONAL HYGIENE                                            | 0                                       | 0          | 8                                          | 4.316         | 0(0-Inf)                 |
| POOR POSTURE                                                     | 1                                       | 7.63       | 29                                         | 9.4878        | 0.8042(0.109-5.931)      |
| POPPING KNEE                                                     | 0                                       | 0          | 3                                          | 0.8018        | 0(0-Inf)                 |
| PORCELAIN GALLBLADDER                                            | 0                                       | 0          | 6                                          | 1.9488        | 0(0-Inf)                 |
| PORE OF WINER                                                    | 0                                       | 0          | 19                                         | 6.4161        | 0(0-Inf)                 |
| POROKERATOSIS, NOS                                               | 2                                       | 15.6404    | 53                                         | 17.8499       | 0.8762(0.2127-3.6093)    |
| POROMA (ECCRINE)                                                 | 0                                       | 0          | 13                                         | 3.7009        | 0(0-Inf)                 |
| PORPHYRIA, ACUTE                                                 | 0                                       | 0          | 2                                          | 0.4853        | 0(0-Inf)                 |
| PORPHYRIA, INTERMITTENT                                          | 0                                       | 0          | 3                                          | 0.741         | 0(0-Inf)                 |
| PORPHYRIA, NOS                                                   | 0                                       | 0          | 16                                         | 4.3291        | 0(0-Inf)                 |
| PORT WINE (CODE ALSO HEMANGIOMA, SKIN BY SITE)                   | 1                                       | 7.0378     | 10                                         | 2.2953        | 3.0661(0.3859-24.3596)   |
| POSTERIOR EMBRYOTOXON                                            | 0                                       | 0          | 1                                          | 0.3526        | 0(0-Inf)                 |
| POSTHITIS                                                        | 0                                       | 0          | 3                                          | 1.3881        | 0(0-Inf)                 |
| POST-ICTAL CONDITION NEC                                         | 0                                       | 0          | 5                                          | 2.0248        | 0(0-Inf)                 |
| POSTMENOPAUSAL, ENDOMETRIUM, NOS                                 | 0                                       | 0          | 7                                          | 1.5387        | 0(0-Inf)                 |

| Description                                              | No. of Positive Cases with Disease Code | Case Rate* | No. of Positive Controls with Disease Code | Control Rate* | Relative Risk (95%CI)   |
|----------------------------------------------------------|-----------------------------------------|------------|--------------------------------------------|---------------|-------------------------|
| POSTMENOPAUSAL, STATE                                    | 46                                      | 672.7097   | 2068                                       | 1028.8086     | 0.6539(0.4879-0.8763)   |
| POUCHITIS                                                | 0                                       | 0          | 2                                          | 0.432         | 0(0-Inf)                |
| PRECOCIOUS, PUBERTY, NOS                                 | 0                                       | 0          | 1                                          | 0.8529        | 0(0-Inf)                |
| PREECLAMPSIA, NOS                                        | 1                                       | 38.41      | 7                                          | 4.03          | 9.5311(1.169-77.7113)   |
| PRE-EXCITATION (HEART)                                   | 0                                       | 0          | 1                                          | 0.8878        | 0(0-Inf)                |
| PRE-GLAUCOMA                                             | 0                                       | 0          | 1                                          | 0.2354        | 0(0-Inf)                |
| PREGNANCY, ECTOPIC                                       | 0                                       | 0          | 4                                          | 2.745         | 0(0-Inf)                |
| PREGNANCY, MULTIPLE NEC/NOS                              | 0                                       | 0          | 2                                          | 1.6547        | 0(0-Inf)                |
| PREGNANCY, NOS--PREG                                     | 2                                       | 211.0438   | 208                                        | 322.375       | 0.6547(0.1626-2.6352)   |
| PREGNANCY, PROLONGED, WITH DELIVERY                      | 0                                       | 0          | 1                                          | 0.8276        | 0(0-Inf)                |
| PREGNANCY, TUBAL                                         | 0                                       | 0          | 3                                          | 1.9324        | 0(0-Inf)                |
| PREGNANCY, UNCONFIRMED                                   | 0                                       | 0          | 1                                          | 0.398         | 0(0-Inf)                |
| PRELEUKEMIA                                              | 0                                       | 0          | 1                                          | 0.3526        | 0(0-Inf)                |
| PREMATURE, BEATS, ATRIAL                                 | 0                                       | 0          | 40                                         | 10.2982       | 0(0-Inf)                |
| PREMATURE, CLOSURE, FORAMEN OVALE                        | 0                                       | 0          | 1                                          | 0.2354        | 0(0-Inf)                |
| PREMATURE, CONTRACTIONS, ATRIAL--APC                     | 11                                      | 79.2467    | 230                                        | 64.1842       | 1.2347(0.6728-2.266)    |
| PREMATURE, CONTRACTIONS, AURICULOVENTRICULAR             | 1                                       | 30.6487    | 0                                          | 0             | 14423664166.1437(0-Inf) |
| PREMATURE, CONTRACTIONS, NODAL                           | 0                                       | 0          | 17                                         | 4.2724        | 0(0-Inf)                |
| PREMATURE, CONTRACTIONS, NOS (HEART DX)                  | 1                                       | 10.2508    | 19                                         | 9.9624        | 1.029(0.1369-7.7323)    |
| PREMATURE, CONTRACTIONS, VENTRICULAR--PVC                | 28                                      | 204.8788   | 825                                        | 240.8303      | 0.8507(0.5832-1.241)    |
| PREMATURE, EJACULATION                                   | 0                                       | 0          | 16                                         | 10.8188       | 0(0-Inf)                |
| PREMATURE, LABOR, WITH DELIVERY                          | 0                                       | 0          | 2                                          | 1.6558        | 0(0-Inf)                |
| PRESBYASTASIA                                            | 0                                       | 0          | 1                                          | 0.2354        | 0(0-Inf)                |
| PRESBYCUSIS, FAMILIAL                                    | 0                                       | 0          | 2                                          | 0.7055        | 0(0-Inf)                |
| PRESBYCUSIS, NOS                                         | 78                                      | 898.4838   | 1426                                       | 798.1155      | 1.1258(0.8957-1.4149)   |
| PRESBYESOPHAGUS                                          | 3                                       | 46.1668    | 50                                         | 47.8117       | 0.9656(0.3005-3.1032)   |
| PRESBYLARYNX                                             | 1                                       | 10.3674    | 15                                         | 7.9851        | 1.2984(0.1703-9.9013)   |
| PRESBYOPIA--PRSB                                         | 325                                     | 3865.453   | 9171                                       | 3574.3304     | 1.0814(0.9678-1.2085)   |
| PRESBYPHONIA                                             | 2                                       | 28.3705    | 77                                         | 63.1956       | 0.4489(0.1101-1.8302)   |
| PRESENTATION, BREECH, COMPLICATING DELIVERY              | 0                                       | 0          | 5                                          | 3.0672        | 0(0-Inf)                |
| PRESSOR KIDNEY                                           | 0                                       | 0          | 1                                          | 0.4048        | 0(0-Inf)                |
| PRESSURE, INCREASED, INTRAOCULAR, BORDERLINE             | 3                                       | 20.9509    | 69                                         | 17.7604       | 1.1796(0.3698-3.7627)   |
| PRESSURE, INCREASED, INTRAOCULAR, NOS, SEE ALSO GLAUCOMA | 6                                       | 46.8702    | 181                                        | 60.8025       | 0.7709(0.3411-1.742)    |
| PRESSURE, INCREASED, VENOUS                              | 0                                       | 0          | 7                                          | 8.7089        | 0(0-Inf)                |
| PRESSURE, INTRACRANIAL, INCREASE                         | 0                                       | 0          | 6                                          | 1.3474        | 0(0-Inf)                |
| PRESSURE, PELVIC (FULLNESS) (FEMALE #)                   | 1                                       | 6.9635     | 62                                         | 14.0343       | 0.4962(0.0686-3.59)     |
| PRESSURE, PELVIC (SUPRAPUBIC) (FULLNESS) (MALE #)        | 1                                       | 10.7955    | 2                                          | 1.1278        | 9.572(0.8477-108.0855)  |
| PRE-SYNCOPE NOS                                          | 12                                      | 134.2658   | 382                                        | 226.1543      | 0.5937(0.3339-1.0557)   |
| PRIAPISM (MALE #)                                        | 0                                       | 0          | 6                                          | 3.2358        | 0(0-Inf)                |



| Description                                       | No. of Positive Cases with Disease Code | Case Rate* | No. of Positive Controls with Disease Code | Control Rate* | Relative Risk (95%CI)    |
|---------------------------------------------------|-----------------------------------------|------------|--------------------------------------------|---------------|--------------------------|
| PRICKLY HEAT                                      | 0                                       | 0          | 1                                          | 0.2354        | 0(0-Inf)                 |
| PROBLEM, ARTICULATION                             | 1                                       | 7.052      | 2                                          | 0.5607        | 12.5773(1.0964-144.2747) |
| PROBLEM, CONDITIONS (HOUSEHOLD)                   | 0                                       | 0          | 2                                          | 0.5709        | 0(0-Inf)                 |
| PROBLEM, ECONOMIC                                 | 0                                       | 0          | 1                                          | 0.2354        | 0(0-Inf)                 |
| PROBLEM, EMOTIONAL                                | 2                                       | 16.4119    | 8                                          | 2.9368        | 5.5883(1.1658-26.7875)   |
| PROBLEM, EMPLOYMENT (JOB DIFFICULTY)              | 0                                       | 0          | 27                                         | 6.3766        | 0(0-Inf)                 |
| PROBLEM, EYE, OTHER                               | 0                                       | 0          | 2                                          | 1.1974        | 0(0-Inf)                 |
| PROBLEM, FAMILY                                   | 2                                       | 14.3257    | 168                                        | 39.2211       | 0.3653(0.0905-1.4748)    |
| PROBLEM, FEEDING, ADULT                           | 0                                       | 0          | 5                                          | 2.7031        | 0(0-Inf)                 |
| PROBLEM, FEEDING, NOS                             | 0                                       | 0          | 2                                          | 0.5709        | 0(0-Inf)                 |
| PROBLEM, INTERPERSONAL                            | 3                                       | 20.8223    | 63                                         | 15.8248       | 1.3158(0.4116-4.2068)    |
| PROBLEM, LEARNING                                 | 0                                       | 0          | 2                                          | 0.5475        | 0(0-Inf)                 |
| PROBLEM, LEGAL                                    | 0                                       | 0          | 1                                          | 0.4048        | 0(0-Inf)                 |
| PROBLEM, MARITAL                                  | 16                                      | 148.3471   | 491                                        | 129.8124      | 1.1428(0.6937-1.8826)    |
| PROBLEM, NEC                                      | 0                                       | 0          | 27                                         | 7.4995        | 0(0-Inf)                 |
| PROBLEM, PARENT - CHILD                           | 1                                       | 7.7178     | 49                                         | 11.5325       | 0.6692(0.0921-4.8637)    |
| PROBLEM, PARTNER RELATIONSHIP                     | 4                                       | 28.1662    | 121                                        | 33.069        | 0.8517(0.3138-2.3116)    |
| PROBLEM, PSYCHIATRIC                              | 1                                       | 6.9458     | 14                                         | 3.5094        | 1.9792(0.2576-15.2073)   |
| PROBLEM, PSYCHOSOCIAL                             | 5                                       | 45.5471    | 97                                         | 42.0457       | 1.0833(0.4397-2.669)     |
| PROBLEM, READING                                  | 1                                       | 12.5097    | 9                                          | 6.2664        | 1.9963(0.2505-15.9064)   |
| PROBLEM, VOICE, POST-SURGICAL                     | 0                                       | 0          | 1                                          | 0.8879        | 0(0-Inf)                 |
| PROBLEM, WRITING                                  | 0                                       | 0          | 6                                          | 2.0983        | 0(0-Inf)                 |
| PROCIDENTIA, UTERINE, SEE ALSO DESCENSUS, UTERINE | 1                                       | 14.2258    | 78                                         | 42.5359       | 0.3344(0.0464-2.41)      |
| PROCTALGIA, FUGAX                                 | 2                                       | 14.9945    | 81                                         | 19.5002       | 0.7689(0.1885-3.1359)    |
| PROCTALGIA, NOS                                   | 0                                       | 0          | 20                                         | 6.6151        | 0(0-Inf)                 |
| PROCTITIS, DRUG-INDUCED                           | 0                                       | 0          | 1                                          | 0.3526        | 0(0-Inf)                 |
| PROCTITIS, IRRADIATION                            | 0                                       | 0          | 14                                         | 5.311         | 0(0-Inf)                 |
| PROCTITIS, NOS                                    | 3                                       | 21.0475    | 81                                         | 19.9924       | 1.0528(0.3315-3.3437)    |
| PROCTITIS, RADIATION                              | 1                                       | 13.7119    | 59                                         | 45.611        | 0.3006(0.0416-2.1726)    |
| PROCTITIS, ULCERATIVE                             | 3                                       | 23.1293    | 42                                         | 10.3672       | 2.231(0.6874-7.2404)     |
| PROCTOSIGMOIDITIS, CHRONIC ULCERATIVE             | 0                                       | 0          | 20                                         | 5.4051        | 0(0-Inf)                 |
| PROCTOSIGMOIDITIS, NOS                            | 1                                       | 7.0012     | 28                                         | 7.5844        | 0.9231(0.125-6.8184)     |
| PROCTOSPASM                                       | 1                                       | 11.409     | 4                                          | 1.0807        | 10.5567(1.1455-97.2857)  |
| PROGNATHISM, MANDIBULAR (LOWER JAW)               | 0                                       | 0          | 7                                          | 2.6661        | 0(0-Inf)                 |
| PROGNATHISM, MAXILLARY (UPPER JAW)                | 1                                       | 37.4229    | 14                                         | 9.102         | 4.1115(0.5378-31.434)    |
| PROLACTINOMA                                      | 0                                       | 0          | 1                                          | 0.8877        | 0(0-Inf)                 |
| PROLAPSE, ANAL                                    | 0                                       | 0          | 4                                          | 1.5795        | 0(0-Inf)                 |
| PROLAPSE, ANAL MUCOSAL                            | 0                                       | 0          | 13                                         | 3.1627        | 0(0-Inf)                 |
| PROLAPSE, BLADDER, CONGENITAL                     | 0                                       | 0          | 1                                          | 0.2354        | 0(0-Inf)                 |
| PROLAPSE, BLADDER, FEMALE, ACQUIRED               | 0                                       | 0          | 29                                         | 22.4483       | 0(0-Inf)                 |

| Description                                                      | No. of Positive Cases with Disease Code | Case Rate* | No. of Positive Controls with Disease Code | Control Rate* | Relative Risk (95%CI)    |
|------------------------------------------------------------------|-----------------------------------------|------------|--------------------------------------------|---------------|--------------------------|
| PROLAPSE, BLADDER, MALE, ACQUIRED                                | 0                                       | 0          | 1                                          | 0.2729        | 0(0-Inf)                 |
| PROLAPSE, CERVICAL STUMP, SEE ALSO DESCENSUS, CERVICAL STUMP     | 0                                       | 0          | 2                                          | 0.4709        | 0(0-Inf)                 |
| PROLAPSE, CERVIX, NOS                                            | 0                                       | 0          | 5                                          | 1.0845        | 0(0-Inf)                 |
| PROLAPSE, COLOSTOMY                                              | 0                                       | 0          | 3                                          | 1.9037        | 0(0-Inf)                 |
| PROLAPSE, EYE IMPLANT                                            | 0                                       | 0          | 1                                          | 0.234         | 0(0-Inf)                 |
| PROLAPSE, GENITAL ORGAN, FEMALE                                  | 1                                       | 14.2808    | 50                                         | 27.7371       | 0.5149(0.0709-3.7407)    |
| PROLAPSE, HEMORRHOIDS                                            | 4                                       | 28.3999    | 144                                        | 40.6805       | 0.6981(0.258-1.8892)     |
| PROLAPSE, INTESTINE                                              | 0                                       | 0          | 3                                          | 0.8018        | 0(0-Inf)                 |
| PROLAPSE, IRIS                                                   | 0                                       | 0          | 6                                          | 3.0238        | 0(0-Inf)                 |
| PROLAPSE, MEATUS URINARIUS                                       | 0                                       | 0          | 1                                          | 0.234         | 0(0-Inf)                 |
| PROLAPSE, MITRAL VALVE--MVP                                      | 27                                      | 198.1815   | 718                                        | 170.8151      | 1.1602(0.7891-1.7059)    |
| PROLAPSE, PERINEUM, FEMALE                                       | 0                                       | 0          | 1                                          | 0.4048        | 0(0-Inf)                 |
| PROLAPSE, RECTAL MUCOSAL                                         | 2                                       | 15.6837    | 18                                         | 4.3332        | 3.6195(0.8304-15.7767)   |
| PROLAPSE, RECTUM                                                 | 3                                       | 24.4941    | 54                                         | 19.6574       | 1.246(0.3878-4.0042)     |
| PROLAPSE, TRICUSPID VALVE                                        | 1                                       | 8.0749     | 2                                          | 0.7121        | 11.3394(0.9852-130.5119) |
| PROLAPSE, UMBILICAL CORD                                         | 0                                       | 0          | 1                                          | 0.8274        | 0(0-Inf)                 |
| PROLAPSE, URETER, NOS                                            | 0                                       | 0          | 2                                          | 1.1619        | 0(0-Inf)                 |
| PROLAPSE, URETHRA, NOS                                           | 3                                       | 41.5736    | 51                                         | 24.7932       | 1.6768(0.5201-5.4066)    |
| PROLAPSE, UTERINE, SEE ALSO DESCENSUS, UTERINE                   | 6                                       | 84.4192    | 185                                        | 95.1163       | 0.8875(0.3926-2.0062)    |
| PROLAPSE, UVEAL TRACT                                            | 0                                       | 0          | 1                                          | 2.4856        | 0(0-Inf)                 |
| PROLAPSE, VAGINA, ANTERIOR, CODE ALSO PROLAPSE, VAGINA BY GRADE  | 0                                       | 0          | 2                                          | 0.5909        | 0(0-Inf)                 |
| PROLAPSE, VAGINA, GR 1                                           | 0                                       | 0          | 1                                          | 0.4048        | 0(0-Inf)                 |
| PROLAPSE, VAGINA, GR 2                                           | 0                                       | 0          | 7                                          | 1.5381        | 0(0-Inf)                 |
| PROLAPSE, VAGINA, GR 3                                           | 0                                       | 0          | 11                                         | 6.0476        | 0(0-Inf)                 |
| PROLAPSE, VAGINA, GR 4                                           | 0                                       | 0          | 3                                          | 0.8116        | 0(0-Inf)                 |
| PROLAPSE, VAGINA, NOS                                            | 12                                      | 179.2138   | 177                                        | 105.1022      | 1.7051(0.9472-3.0695)    |
| PROLAPSE, VAGINA, POSTERIOR, CODE ALSO PROLAPSE, VAGINA BY GRADE | 0                                       | 0          | 1                                          | 0.2354        | 0(0-Inf)                 |
| PROLAPSE, VAGINA, RECURRENT                                      | 1                                       | 7.5164     | 8                                          | 2.5098        | 2.9949(0.3676-24.4015)   |
| PROLIFERATION, ENDOMETRIUM (EARLY/LATE)                          | 0                                       | 0          | 132                                        | 88.1376       | 0(0-Inf)                 |
| PROLIFERATION, PERIRETINAL                                       | 0                                       | 0          | 2                                          | 1.0788        | 0(0-Inf)                 |
| PROLONGED, BLEEDING TIME                                         | 1                                       | 7.375      | 6                                          | 1.338         | 5.512(0.6467-46.9823)    |
| PROMINENT, AURICLE, NOS                                          | 0                                       | 0          | 4                                          | 1.6682        | 0(0-Inf)                 |
| PROMINENT, BONE, SEE ALSO EXOSTOSIS                              | 0                                       | 0          | 3                                          | 2.8229        | 0(0-Inf)                 |
| PROMINENT, BRUNNER'S GLAND                                       | 0                                       | 0          | 3                                          | 1.2151        | 0(0-Inf)                 |
| PROMINENT, CAROTID                                               | 0                                       | 0          | 9                                          | 2.3108        | 0(0-Inf)                 |
| PROMINENT, CRICOPHARYNGEAL SPHINCTER                             | 1                                       | 8.9263     | 28                                         | 11.7642       | 0.7588(0.1028-5.6026)    |
| PROMINENT, EYE, SEE ALSO EXOPHTHALMOS                            | 0                                       | 0          | 1                                          | 0.2354        | 0(0-Inf)                 |

| Description                                             | No. of Positive Cases with Disease Code | Case Rate* | No. of Positive Controls with Disease Code | Control Rate* | Relative Risk (95%CI)   |
|---------------------------------------------------------|-----------------------------------------|------------|--------------------------------------------|---------------|-------------------------|
| PROMINENT, FRENUM, LIP                                  | 0                                       | 0          | 8                                          | 1.9194        | 0(0-Inf)                |
| PROMINENT, FRENUM, NOS                                  | 0                                       | 0          | 25                                         | 5.7213        | 0(0-Inf)                |
| PROMINENT, HILUM (LUNG)                                 | 0                                       | 0          | 5                                          | 2.0361        | 0(0-Inf)                |
| PROMINENT, HILUS, LUNG                                  | 0                                       | 0          | 3                                          | 0.9608        | 0(0-Inf)                |
| PROMINENT, ILEOCECAL VALVE                              | 0                                       | 0          | 13                                         | 4.0742        | 0(0-Inf)                |
| PROMINENT, VASCULAR, SEE ALSO DILATATION                | 0                                       | 0          | 29                                         | 9.0548        | 0(0-Inf)                |
| PRONATION, ANKLE                                        | 0                                       | 0          | 3                                          | 0.9165        | 0(0-Inf)                |
| PRONATION, FOOT                                         | 1                                       | 7.0665     | 89                                         | 20.4809       | 0.345(0.048-2.4818)     |
| PROPTOSIS, EYE                                          | 0                                       | 0          | 16                                         | 4.1106        | 0(0-Inf)                |
| PROSTATISM, BENIGN                                      | 0                                       | 0          | 8                                          | 3.8489        | 0(0-Inf)                |
| PROSTATISM, NOS                                         | 41                                      | 821.4589   | 848                                        | 818.2117      | 1.004(0.7334-1.3744)    |
| PROSTATITIS, ACUTE                                      | 3                                       | 43.4952    | 104                                        | 65.9361       | 0.6597(0.209-2.0823)    |
| PROSTATITIS, CHRONIC                                    | 15                                      | 123.6655   | 254                                        | 95.3439       | 1.297(0.7695-2.1862)    |
| PROSTATITIS, GRANULOMATOUS                              | 1                                       | 15.1711    | 29                                         | 19.8995       | 0.7624(0.1035-5.6157)   |
| PROSTATITIS, NONBACTERIAL                               | 0                                       | 0          | 2                                          | 0.6774        | 0(0-Inf)                |
| PROSTATITIS, NOS                                        | 9                                       | 133.3363   | 375                                        | 246.8633      | 0.5401(0.2786-1.047)    |
| PROSTATITIS, RECURRENT                                  | 1                                       | 14.5172    | 31                                         | 19.6331       | 0.7394(0.1006-5.4341)   |
| PROSTATOSIS                                             | 1                                       | 17.5023    | 13                                         | 7.4921        | 2.3361(0.3033-17.9956)  |
| PROSTHESIS ADJUSTMENT (REPAIR)(REMAKE)-DENTAL # DELETED | 0                                       | 0          | 23                                         | 6.6703        | 0(0-Inf)                |
| PROSTHESIS ADJUSTMENT-(REPAIR) (REMAKE)-DENTAL          | 8                                       | 61.8952    | 158                                        | 51.6921       | 1.1974(0.587-2.4425)    |
| PROTEINOSIS, ALVEOLAR                                   | 0                                       | 0          | 1                                          | 0.2729        | 0(0-Inf)                |
| PROTEINURIA, ASYMPTOMATIC                               | 0                                       | 0          | 2                                          | 0.6774        | 0(0-Inf)                |
| PROTEINURIA, BENICE-JONES, NEC                          | 1                                       | 30.6847    | 0                                          | 0             | 14439026360.8901(0-Inf) |
| PROTEINURIA, NOS                                        | 13                                      | 106.8055   | 180                                        | 66.1617       | 1.6143(0.9174-2.8406)   |
| PROTRUDED, ACETABULUM                                   | 0                                       | 0          | 5                                          | 1.5557        | 0(0-Inf)                |
| PROTRUDED, CERVICAL DISC                                | 0                                       | 0          | 40                                         | 9.619         | 0(0-Inf)                |
| PROTRUDED, DISC SEE HERNIA, DISC                        | 3                                       | 41.714     | 59                                         | 20.5817       | 2.0268(0.633-6.4897)    |
| PROTRUDED, EAR, CONGENITAL                              | 0                                       | 0          | 7                                          | 2.0122        | 0(0-Inf)                |
| PROTRUDED, HIP                                          | 0                                       | 0          | 4                                          | 1.6195        | 0(0-Inf)                |
| PROTRUDED, THORACIC DISC                                | 0                                       | 0          | 6                                          | 2.0979        | 0(0-Inf)                |
| PRURIGO, NODULARIS                                      | 4                                       | 28.7142    | 36                                         | 10.3509       | 2.7741(0.9803-7.85)     |
| PRURIGO, NOS                                            | 2                                       | 13.9441    | 44                                         | 11.4686       | 1.2158(0.2933-5.0397)   |
| PRURITUS, ANI                                           | 24                                      | 182.1855   | 644                                        | 163.8094      | 1.1122(0.7392-1.6734)   |
| PRURITUS, EAR                                           | 2                                       | 15.0643    | 105                                        | 32.609        | 0.462(0.1138-1.8756)    |
| PRURITUS, GENITAL ORGAN, NEC                            | 5                                       | 34.7543    | 100                                        | 24.2317       | 1.4342(0.5818-3.5358)   |
| PRURITUS, NOS                                           | 32                                      | 265.421    | 840                                        | 307.6018      | 0.8629(0.6057-1.2293)   |
| PRURITUS, PROCTO DIAGNOSIS, NOS                         | 0                                       | 0          | 1                                          | 0.2354        | 0(0-Inf)                |
| PRURITUS, SCROTUM                                       | 0                                       | 0          | 10                                         | 3.1048        | 0(0-Inf)                |
| PRURITUS, SENILE                                        | 0                                       | 0          | 4                                          | 3.8037        | 0(0-Inf)                |

| Description                                                                 | No. of Positive Cases with Disease Code | Case Rate* | No. of Positive Controls with Disease Code | Control Rate* | Relative Risk (95%CI)   |
|-----------------------------------------------------------------------------|-----------------------------------------|------------|--------------------------------------------|---------------|-------------------------|
| PRURITUS, VULVAE                                                            | 3                                       | 44.4229    | 141                                        | 61.5206       | 0.7221(0.2296-2.2714)   |
| PSAMMOCARCINOMA CODE ALSO NEOPLASM MALIGNANT BY SITE                        | 0                                       | 0          | 1                                          | 0.398         | 0(0-Inf)                |
| PSAMMOMA, BODIES (NOT BRAIN/MENINGES), CODE ALSO NEOPLASM MALIGNANT BY SITE | 0                                       | 0          | 1                                          | 0.234         | 0(0-Inf)                |
| PSEUDOARTHROSIS, LOWER EXTREMITY                                            | 0                                       | 0          | 3                                          | 1.2151        | 0(0-Inf)                |
| PSEUDOARTHROSIS, LOWER EXTREMITY, FOLLOWING FUSION                          | 0                                       | 0          | 3                                          | 0.6986        | 0(0-Inf)                |
| PSEUDOARTHROSIS, NOS                                                        | 0                                       | 0          | 2                                          | 0.4853        | 0(0-Inf)                |
| PSEUDOARTHROSIS, NOS, FOLLOWING FUSION                                      | 0                                       | 0          | 1                                          | 0.4048        | 0(0-Inf)                |
| PSEUDOARTHROSIS, SPINE                                                      | 0                                       | 0          | 13                                         | 3.6278        | 0(0-Inf)                |
| PSEUDOARTHROSIS, SPINE, FOLLOWING FUSION                                    | 0                                       | 0          | 8                                          | 1.9042        | 0(0-Inf)                |
| PSEUDOARTHROSIS, UPPER EXTREMITY                                            | 0                                       | 0          | 1                                          | 0.4751        | 0(0-Inf)                |
| PSEUDOARTHROSIS, UPPER EXTREMITY, FOLLOWING FUSION                          | 0                                       | 0          | 1                                          | 0.234         | 0(0-Inf)                |
| PSEUDOCLAUDICATION, NOS, SEE ALSO CLAUDICATION                              | 2                                       | 23.8744    | 85                                         | 55.0379       | 0.4338(0.1066-1.7657)   |
| PSEUDOCLAUDICATION, SPINAL CORD                                             | 5                                       | 51.1084    | 145                                        | 74.8457       | 0.6829(0.2795-1.6682)   |
| PSEUDOCYST, LUNG                                                            | 0                                       | 0          | 1                                          | 0.2729        | 0(0-Inf)                |
| PSEUDOCYST, PANCREAS                                                        | 0                                       | 0          | 18                                         | 4.6877        | 0(0-Inf)                |
| PSEUDODEMENTIA                                                              | 0                                       | 0          | 7                                          | 3.1682        | 0(0-Inf)                |
| PSEUDODIVERTICULUM (CODE ALSO DIVERTICULUM BY SITE)                         | 1                                       | 7.9733     | 6                                          | 2.0823        | 3.829(0.4515-32.4761)   |
| PSEUDO-ERYTHROMELALGIA                                                      | 0                                       | 0          | 1                                          | 0.3526        | 0(0-Inf)                |
| PSEUDOEXFOLIATION, LENS CAPSULE                                             | 1                                       | 9.6219     | 35                                         | 16.7912       | 0.573(0.0782-4.1979)    |
| PSEUDOEXFOLIATION, NOS (EYE)                                                | 21                                      | 225.782    | 411                                        | 224.3011      | 1.0066(0.6485-1.5624)   |
| PSEUDOFOLLICULITIS BARBAE                                                   | 1                                       | 7.1511     | 6                                          | 1.5885        | 4.5019(0.5341-37.9456)  |
| PSEUDOGOUT                                                                  | 9                                       | 103.315    | 233                                        | 142.3996      | 0.7255(0.3723-1.4139)   |
| PSEUDOHYPOPARATHYROIDISM                                                    | 0                                       | 0          | 1                                          | 0.3526        | 0(0-Inf)                |
| PSEUDOLYMPHOMA                                                              | 0                                       | 0          | 1                                          | 0.3526        | 0(0-Inf)                |
| PSEUDOMENINGOCELE                                                           | 0                                       | 0          | 3                                          | 0.7971        | 0(0-Inf)                |
| PSEUDOMONAS MALTOPHILIA                                                     | 0                                       | 0          | 2                                          | 0.4708        | 0(0-Inf)                |
| PSEUDOMYXOMA PERITONEUM                                                     | 1                                       | 6.9303     | 1                                          | 0.2545        | 27.2308(1.6048-462.069) |
| PSEUDO-OBSTRUCTION INTESTINE                                                | 3                                       | 29.6649    | 19                                         | 9.3583        | 3.1699(0.9295-10.8103)  |
| PSEUDOPHAKOS                                                                | 136                                     | 2074.603   | 2705                                       | 2150.5406     | 0.9647(0.8117-1.1464)   |
| PSEUDOPOLYP (CODE ALSO POLYP PART OF BODY SPECIFIED)                        | 3                                       | 21.5581    | 47                                         | 13.6525       | 1.5791(0.4891-5.0983)   |
| PSEUDOPTERYGIUM                                                             | 0                                       | 0          | 1                                          | 0.2354        | 0(0-Inf)                |
| PSEUDOSCLEROSIS                                                             | 0                                       | 0          | 1                                          | 0.8878        | 0(0-Inf)                |
| PSEUDOSEIZURE                                                               | 0                                       | 0          | 3                                          | 0.8018        | 0(0-Inf)                |
| PSEUDOSPONDYLOLISTHESIS                                                     | 0                                       | 0          | 3                                          | 0.7066        | 0(0-Inf)                |
| PSEUDOTUBERCULOSIS PASTEURELLA                                              | 0                                       | 0          | 1                                          | 2.4855        | 0(0-Inf)                |
| PSEUDOTUMOR, ORBIT                                                          | 0                                       | 0          | 5                                          | 1.2018        | 0(0-Inf)                |
| PSEUDOXANTHOMA ELASTICUM                                                    | 0                                       | 0          | 6                                          | 3.5928        | 0(0-Inf)                |
| PSORIASIS, GUTTATE                                                          | 1                                       | 6.9317     | 20                                         | 5.0041        | 1.3852(0.1844-10.4036)  |
| PSORIASIS, INVERSE (INVETERATA)                                             | 0                                       | 0          | 7                                          | 2.516         | 0(0-Inf)                |

| Description                                       | No. of Positive Cases with Disease Code | Case Rate* | No. of Positive Controls with Disease Code | Control Rate* | Relative Risk (95%CI)  |
|---------------------------------------------------|-----------------------------------------|------------|--------------------------------------------|---------------|------------------------|
| PSORIASIS, NOS--PSOR                              | 17                                      | 120.672    | 617                                        | 153.6967      | 0.7851(0.4844-1.2725)  |
| PSORIASIS, PUSTULAR                               | 1                                       | 7.0889     | 19                                         | 4.3506        | 1.6294(0.2161-12.2868) |
| PSORIASIS, VULGARIS                               | 7                                       | 50.0612    | 140                                        | 33.928        | 1.4755(0.6887-3.1614)  |
| PSYCHOGENIC DISTURBANCE NOS (SEE ALSO DISORDER)   | 0                                       | 0          | 1                                          | 0.234         | 0(0-Inf)               |
| PSYCHONEUROSIS, ANXIETY                           | 0                                       | 0          | 1                                          | 0.2729        | 0(0-Inf)               |
| PSYCHONEUROSIS, NOS                               | 2                                       | 23.872     | 33                                         | 9.1204        | 2.6174(0.6241-10.9772) |
| PSYCHONEUROSIS, OBSESSIONAL                       | 0                                       | 0          | 1                                          | 0.234         | 0(0-Inf)               |
| PSYCHOSIS, ACUTE, NOS                             | 0                                       | 0          | 13                                         | 3.0427        | 0(0-Inf)               |
| PSYCHOSIS, ACUTE, WITH DEGENERATIVE DISEASES, CNS | 0                                       | 0          | 1                                          | 0.8528        | 0(0-Inf)               |
| PSYCHOSIS, CHRONIC, NOS                           | 0                                       | 0          | 4                                          | 1.9332        | 0(0-Inf)               |
| PSYCHOSIS, NEC                                    | 2                                       | 15.4338    | 36                                         | 11.7907       | 1.309(0.3133-5.4689)   |
| PSYCHOSIS, NOS                                    | 5                                       | 47.6626    | 134                                        | 62.8977       | 0.7578(0.3097-1.8542)  |
| PSYCHOSIS, PARANOID, ACUTE                        | 0                                       | 0          | 3                                          | 0.7022        | 0(0-Inf)               |
| PSYCHOSIS, PARANOID, NEC/NOS                      | 1                                       | 13.1615    | 9                                          | 7.2128        | 1.8247(0.2292-14.5266) |
| PTERYGIUM, NAIL                                   | 0                                       | 0          | 2                                          | 0.7896        | 0(0-Inf)               |
| PTERYGIUM, NOS                                    | 3                                       | 20.9671    | 90                                         | 24.6951       | 0.849(0.268-2.6894)    |
| PTERYGIUM, RECURRENT                              | 0                                       | 0          | 2                                          | 0.5458        | 0(0-Inf)               |
| PTOSIS, BREAST                                    | 0                                       | 0          | 23                                         | 6.5396        | 0(0-Inf)               |
| PTOSIS, BROW                                      | 3                                       | 25.9722    | 98                                         | 39.2714       | 0.6614(0.2092-2.0908)  |
| PTOSIS, EYELID, ACQUIRED, SENILE                  | 0                                       | 0          | 2                                          | 1.7767        | 0(0-Inf)               |
| PTOSIS, EYELID, CONGENITAL                        | 1                                       | 7.2528     | 10                                         | 2.3827        | 3.0439(0.3839-24.1366) |
| PTOSIS, EYELID, NOS                               | 20                                      | 163.4571   | 510                                        | 181.5443      | 0.9004(0.5752-1.4093)  |
| PTOSIS, KIDNEY, NOS                               | 1                                       | 6.8959     | 0                                          | 0             | 12239850962.131(0-Inf) |
| PTOSIS, LYMPH GLAND/NODE                          | 0                                       | 0          | 9                                          | 3.9067        | 0(0-Inf)               |
| PTOSIS, MYOGENIC                                  | 0                                       | 0          | 2                                          | 1.1971        | 0(0-Inf)               |
| PUCKER (MACULAR)                                  | 1                                       | 7.4881     | 37                                         | 11.5643       | 0.6475(0.0885-4.7383)  |
| PULPITIS, ACUTE                                   | 3                                       | 23.1622    | 93                                         | 22.2697       | 1.0401(0.3284-3.2938)  |
| PULPITIS, CHRONIC                                 | 1                                       | 7.017      | 9                                          | 2.1969        | 3.194(0.3983-25.6125)  |
| PULPITIS, NOS                                     | 13                                      | 99.057     | 394                                        | 93.909        | 1.0548(0.6061-1.8357)  |
| PULSE, ALTERNATING                                | 0                                       | 0          | 1                                          | 1.9066        | 0(0-Inf)               |
| PULSE, RAPID                                      | 0                                       | 0          | 18                                         | 5.2008        | 0(0-Inf)               |
| PULSE, SLOW                                       | 0                                       | 0          | 3                                          | 3.9229        | 0(0-Inf)               |
| PUMP-BUMPS                                        | 0                                       | 0          | 1                                          | 0.2354        | 0(0-Inf)               |
| PURPURA, ANAPHYLACTOID                            | 0                                       | 0          | 3                                          | 1.0728        | 0(0-Inf)               |
| PURPURA, HENOCHE-SCHONLEIN                        | 0                                       | 0          | 2                                          | 0.5069        | 0(0-Inf)               |
| PURPURA, NONTHROMBOCYTOPENIC                      | 0                                       | 0          | 1                                          | 0.398         | 0(0-Inf)               |
| PURPURA, NOS                                      | 9                                       | 78.8676    | 122                                        | 49.5811       | 1.5907(0.8058-3.14)    |
| PURPURA, SCHAMBERG'S TYPE                         | 2                                       | 15.1615    | 39                                         | 12.4302       | 1.2197(0.2931-5.0764)  |
| PURPURA, SENILE                                   | 0                                       | 0          | 37                                         | 28.7826       | 0(0-Inf)               |
| PURPURA, SIMPLEX                                  | 3                                       | 21.2939    | 112                                        | 30.6607       | 0.6945(0.2201-2.1915)  |

| Description                                      | No. of Positive Cases with Disease Code | Case Rate* | No. of Positive Controls with Disease Code | Control Rate* | Relative Risk (95%CI)    |
|--------------------------------------------------|-----------------------------------------|------------|--------------------------------------------|---------------|--------------------------|
| PURPURA, STASIS                                  | 0                                       | 0          | 3                                          | 0.8018        | 0(0-Inf)                 |
| PURPURA, THROMBOCYTOPENIC (IDIOPATHIC), NOS--ITP | 2                                       | 15.337     | 55                                         | 17.9295       | 0.8554(0.2079-3.52)      |
| PURPURA, THROMBOTIC THROMBOCYTOPENIC             | 0                                       | 0          | 3                                          | 0.9772        | 0(0-Inf)                 |
| PUSTULE, CUTANEOUS                               | 0                                       | 0          | 9                                          | 2.366         | 0(0-Inf)                 |
| PUSTULE, NOS                                     | 3                                       | 21.0047    | 108                                        | 26.3726       | 0.7965(0.2522-2.5149)    |
| PUSTULE, SUBCORNEAL                              | 0                                       | 0          | 9                                          | 4.6933        | 0(0-Inf)                 |
| PYELECTASIS                                      | 0                                       | 0          | 1                                          | 0.8536        | 0(0-Inf)                 |
| PYELITIS, NOS, SEE ALSO PYELONEPHRITIS           | 0                                       | 0          | 1                                          | 0.8276        | 0(0-Inf)                 |
| PYELOCALIECTASIS                                 | 1                                       | 7.1363     | 20                                         | 5.6946        | 1.2532(0.167-9.4046)     |
| PYELONEPHRITIS, ACUTE                            | 1                                       | 6.9707     | 53                                         | 12.6815       | 0.5497(0.0758-3.9869)    |
| PYELONEPHRITIS, CHRONIC                          | 3                                       | 21.0705    | 22                                         | 5.2441        | 4.0179(1.1887-13.5816)   |
| PYELONEPHRITIS, NOS                              | 22                                      | 161.2156   | 351                                        | 100.889       | 1.5979(1.0366-2.4633)    |
| PYELONEPHRITIS, RECURRENT                        | 2                                       | 15.2386    | 10                                         | 3.2625        | 4.6708(1.008-21.6441)    |
| PYELONEPHRITIS, SUBACUTE                         | 0                                       | 0          | 1                                          | 0.4048        | 0(0-Inf)                 |
| PYELONEPHRITIS, XANTHOGRANULOMATOUS              | 0                                       | 0          | 1                                          | 0.2354        | 0(0-Inf)                 |
| PYELONEPHROSIS (SEE ALSO PYELONEPHRITIS)         | 0                                       | 0          | 1                                          | 0.888         | 0(0-Inf)                 |
| PYLOROSPASM                                      | 0                                       | 0          | 4                                          | 0.9237        | 0(0-Inf)                 |
| PYOCELE, TURBINATE                               | 0                                       | 0          | 2                                          | 0.7898        | 0(0-Inf)                 |
| PYODERMA, FACIALE                                | 0                                       | 0          | 5                                          | 1.2481        | 0(0-Inf)                 |
| PYODERMA, GANGRENOSUM                            | 0                                       | 0          | 2                                          | 1.1971        | 0(0-Inf)                 |
| PYODERMA, NOS                                    | 1                                       | 7.781      | 41                                         | 9.9339        | 0.7833(0.1073-5.7165)    |
| PYOMETRA                                         | 0                                       | 0          | 9                                          | 3.1463        | 0(0-Inf)                 |
| PYOMETRIUM                                       | 0                                       | 0          | 1                                          | 0.4049        | 0(0-Inf)                 |
| PYONEPHROSIS (SEE ALSO PYELONEPHRITIS)           | 1                                       | 9.5628     | 1                                          | 0.4931        | 19.3949(1.1515-326.6836) |
| PYORRHEA (ALVEOLAR)                              | 0                                       | 0          | 7                                          | 1.7378        | 0(0-Inf)                 |
| PYREXIA, NOS, SEE ALSO FEVER                     | 0                                       | 0          | 4                                          | 1.3219        | 0(0-Inf)                 |
| PYROSIS                                          | 5                                       | 35.5594    | 177                                        | 42.99         | 0.8272(0.3394-2.016)     |
| PYURIA (SEE ALSO INFECTION URINARY)              | 13                                      | 96.1524    | 254                                        | 75.1516       | 1.2794(0.7312-2.2388)    |
| QUADRANTANOPSIA                                  | 2                                       | 23.3494    | 22                                         | 13.694        | 1.7051(0.3987-7.2924)    |
| QUADRIPARALYSIS SEE ALSO QUADRIPLEGIA            | 0                                       | 0          | 6                                          | 1.7725        | 0(0-Inf)                 |
| QUADRIPLEGIA, NOS                                | 1                                       | 6.9287     | 27                                         | 6.8246        | 1.0153(0.1372-7.5136)    |
| QUADRIPLEGIA, SPASTIC, INFANTILE                 | 0                                       | 0          | 4                                          | 0.9237        | 0(0-Inf)                 |
| QUADRIPLEGIA, SPINAL                             | 1                                       | 8.3348     | 9                                          | 2.4124        | 3.4549(0.4321-27.6216)   |
| QUINSY                                           | 0                                       | 0          | 1                                          | 0.3526        | 0(0-Inf)                 |
| RADIATION IN AIR/FOOD/SOIL/WATER/ETC.            | 0                                       | 0          | 1                                          | 0.4048        | 0(0-Inf)                 |
| RADICULITIS, ARM                                 | 0                                       | 0          | 2                                          | 0.5708        | 0(0-Inf)                 |
| RADICULITIS, BRACHIAL                            | 0                                       | 0          | 1                                          | 0.398         | 0(0-Inf)                 |
| RADICULITIS, CERVICAL                            | 2                                       | 14.6345    | 40                                         | 9.8629        | 1.4838(0.3568-6.17)      |
| RADICULITIS, LEG                                 | 0                                       | 0          | 6                                          | 1.5037        | 0(0-Inf)                 |
| RADICULITIS, LUMBAR                              | 1                                       | 7.0621     | 68                                         | 18.609        | 0.3795(0.0526-2.7395)    |

| Description                                                 | No. of Positive Cases with Disease Code | Case Rate* | No. of Positive Controls with Disease Code | Control Rate* | Relative Risk (95%CI)  |
|-------------------------------------------------------------|-----------------------------------------|------------|--------------------------------------------|---------------|------------------------|
| RADICULITIS, NOS                                            | 0                                       | 0          | 30                                         | 9.5603        | 0(0-Inf)               |
| RADICULITIS, THORACIC                                       | 0                                       | 0          | 7                                          | 1.7407        | 0(0-Inf)               |
| RADICULOPATHY, CERVICAL--RADC                               | 30                                      | 218.4543   | 879                                        | 220.8677      | 0.9891(0.6867-1.4246)  |
| RADICULOPATHY, LUMBAR--RADL                                 | 49                                      | 364.3669   | 1561                                       | 463.0295      | 0.7869(0.5917-1.0465)  |
| RADICULOPATHY, NOS--RAD                                     | 22                                      | 158.8575   | 640                                        | 181.3144      | 0.8761(0.5722-1.3416)  |
| RADICULOPATHY, THORACIC--RADT                               | 1                                       | 7.6503     | 46                                         | 14.8974       | 0.5135(0.0706-3.7358)  |
| RADIODERMATITIS                                             | 0                                       | 0          | 3                                          | 0.746         | 0(0-Inf)               |
| RAEB (REFRACTORY ANEMIA/EXCESS BLASTS)                      | 0                                       | 0          | 1                                          | 2.4855        | 0(0-Inf)               |
| RALES                                                       | 3                                       | 32.4604    | 37                                         | 20.7598       | 1.5636(0.4799-5.0947)  |
| RANULA                                                      | 0                                       | 0          | 2                                          | 1.1972        | 0(0-Inf)               |
| RAPE, NOS                                                   | 0                                       | 0          | 1                                          | 0.8272        | 0(0-Inf)               |
| RAPID, BONE GROWTH                                          | 0                                       | 0          | 1                                          | 0.398         | 0(0-Inf)               |
| RAPID, EYE MOVEMENTS OF SLEEP-REM                           | 3                                       | 23.4718    | 127                                        | 43.6426       | 0.5378(0.1709-1.6929)  |
| RAPID, VENTRICULAR RESPONSE                                 | 28                                      | 363.9076   | 427                                        | 311.6936      | 1.1675(0.7957-1.7132)  |
| RAPS ABNORMAL                                               | 0                                       | 0          | 2                                          | 0.4854        | 0(0-Inf)               |
| RASH, DIAPER, MONILIAL                                      | 0                                       | 0          | 2                                          | 1.8992        | 0(0-Inf)               |
| RASH, DIAPER, NOS                                           | 0                                       | 0          | 1                                          | 0.4048        | 0(0-Inf)               |
| RASH, DRUG, NOS CODE ALSO ADVERSE EFFECT IF STATED          | 5                                       | 40.1846    | 152                                        | 53.7914       | 0.747(0.3059-1.8246)   |
| RASH, FOOD                                                  | 0                                       | 0          | 1                                          | 0.234         | 0(0-Inf)               |
| RASH, HEAT                                                  | 0                                       | 0          | 6                                          | 1.4006        | 0(0-Inf)               |
| RASH, NOS - SEE ALSO EXANTHEM                               | 65                                      | 530.8596   | 1791                                       | 646.0277      | 0.8217(0.6412-1.0532)  |
| RAYNAUD'S CONDITION NEC/NOS                                 | 2                                       | 15.9971    | 31                                         | 10.8638       | 1.4725(0.3501-6.1937)  |
| REACTION, ADJUSTMENT, ADOLESCENCE (TEEN YEARS)--RXAD        | 4                                       | 33.669     | 58                                         | 22.1966       | 1.5169(0.5481-4.1976)  |
| REACTION, ADJUSTMENT, ADULT LIFE                            | 0                                       | 0          | 1                                          | 0.2729        | 0(0-Inf)               |
| REACTION, ADJUSTMENT, ADULT LIFE--RXAL                      | 50                                      | 501.1318   | 1915                                       | 519.5863      | 0.9645(0.7279-1.2779)  |
| REACTION, ADJUSTMENT, CHILDHOOD                             | 0                                       | 0          | 3                                          | 0.9609        | 0(0-Inf)               |
| REACTION, ADJUSTMENT, LATE LIFE (AFTER RETIREMENT/AGE 65)   | 55                                      | 590.9436   | 1302                                       | 701.3636      | 0.8426(0.6429-1.1043)  |
| REACTION, ALLERGIC, NOS                                     | 13                                      | 91.1828    | 364                                        | 91.8664       | 0.9926(0.5699-1.7288)  |
| REACTION, ANAPHYLACTIC (CODE ALSO EFFECT ADVERSE IF STATED) | 1                                       | 7.7356     | 23                                         | 5.5301        | 1.3988(0.1876-10.4296) |
| REACTION, CONVERSION                                        | 1                                       | 10.0474    | 18                                         | 4.5613        | 2.2028(0.2914-16.6506) |
| REACTION, DEPRESSIVE                                        | 2                                       | 16.1914    | 20                                         | 7.1422        | 2.267(0.5249-9.7915)   |
| REACTION, DISSOCIATIVE                                      | 0                                       | 0          | 1                                          | 0.8528        | 0(0-Inf)               |
| REACTION, DUE TO EXTERNAL MEDICATION                        | 0                                       | 0          | 1                                          | 0.8528        | 0(0-Inf)               |
| REACTION, EMOTIONAL, CODE ALSO REACTION BY AGE              | 1                                       | 6.9379     | 6                                          | 1.4518        | 4.7788(0.5615-40.6731) |
| REACTION, FOREIGN BODY, BONE OR SOFT TISSUE                 | 4                                       | 29.4329    | 107                                        | 25.0672       | 1.1742(0.4314-3.1958)  |
| REACTION, FOREIGN BODY, SKIN                                | 3                                       | 22.8777    | 78                                         | 25.4748       | 0.8981(0.2826-2.8534)  |
| REACTION, GRAFT VERSUS HOST                                 | 0                                       | 0          | 1                                          | 0.3527        | 0(0-Inf)               |
| REACTION, GRIEF, CODE ALSO REACTION BY AGE                  | 17                                      | 146.505    | 582                                        | 229.9024      | 0.6372(0.393-1.0332)   |

| Description                                                                | No. of Positive Cases with Disease Code | Case Rate* | No. of Positive Controls with Disease Code | Control Rate* | Relative Risk (95%CI)  |
|----------------------------------------------------------------------------|-----------------------------------------|------------|--------------------------------------------|---------------|------------------------|
| REACTION, ID                                                               | 0                                       | 0          | 16                                         | 4.2159        | 0(0-Inf)               |
| REACTION, INSULIN                                                          | 2                                       | 14.7634    | 45                                         | 13.7319       | 1.0751(0.2597-4.4512)  |
| REACTION, LEUKEMOID                                                        | 0                                       | 0          | 2                                          | 3.0815        | 0(0-Inf)               |
| REACTION, LICHENOID                                                        | 0                                       | 0          | 19                                         | 5.8109        | 0(0-Inf)               |
| REACTION, PSYCHOPHYSIOLOGIC/PSYCHOSOMATIC/PSYCHOGENIC<br>SEE ALSO DISORDER | 4                                       | 30.3857    | 89                                         | 20.6277       | 1.4731(0.5388-4.0271)  |
| REACTION, PSYCHOTIC, DEPRESSIVE                                            | 0                                       | 0          | 4                                          | 1.3527        | 0(0-Inf)               |
| REACTION, PUPILLARY TONIC                                                  | 0                                       | 0          | 1                                          | 0.2354        | 0(0-Inf)               |
| REACTION, SERUM                                                            | 0                                       | 0          | 5                                          | 1.1303        | 0(0-Inf)               |
| REACTION, SITUATIONAL, CODE ALSO REACTION BY AGE                           | 3                                       | 21.5599    | 136                                        | 38.3256       | 0.5625(0.1788-1.7697)  |
| REACTION, TRANSFUSION                                                      | 0                                       | 0          | 8                                          | 5.3888        | 0(0-Inf)               |
| REACTION, VASOVAGAL                                                        | 4                                       | 27.9743    | 41                                         | 11.0049       | 2.542(0.9046-7.1433)   |
| REACTION, WITHDRAWING                                                      | 1                                       | 11.3275    | 3                                          | 1.9681        | 5.7556(0.5845-56.6733) |
| REACTIVE BLOOD PRESSURE                                                    | 0                                       | 0          | 1                                          | 0.4049        | 0(0-Inf)               |
| RECERTIFICATION FOR NURSING HOME/CARE                                      | 4                                       | 77.3178    | 141                                        | 181.978       | 0.4249(0.1572-1.1487)  |
| RECESSION, ANGLE CHAMBER                                                   | 0                                       | 0          | 7                                          | 1.8546        | 0(0-Inf)               |
| RECESSION, CHIN                                                            | 0                                       | 0          | 2                                          | 0.5837        | 0(0-Inf)               |
| RECESSION, GINGIVAL                                                        | 2                                       | 15.6273    | 132                                        | 30.7752       | 0.5078(0.1254-2.0555)  |
| RECHECK POST-OPERATIVE                                                     | 36                                      | 273.381    | 912                                        | 273.5193      | 0.9995(0.7157-1.3958)  |
| RECTOCELE, GR 1                                                            | 3                                       | 58.1286    | 67                                         | 31.4543       | 1.848(0.5787-5.9013)   |
| RECTOCELE, GR 2                                                            | 9                                       | 143.9133   | 388                                        | 172.7343      | 0.8331(0.4296-1.6158)  |
| RECTOCELE, GR 3                                                            | 3                                       | 41.7309    | 195                                        | 97.03         | 0.4301(0.1373-1.3474)  |
| RECTOCELE, GR 4                                                            | 2                                       | 30.3192    | 36                                         | 22.9883       | 1.3189(0.3155-5.5129)  |
| RECTOCELE, NOS                                                             | 8                                       | 113.1342   | 461                                        | 214.109       | 0.5284(0.2623-1.0643)  |
| RECTOCELE, P.O. GR 3                                                       | 0                                       | 0          | 1                                          | 0.405         | 0(0-Inf)               |
| RECTOCELE, P.O. GR 4                                                       | 0                                       | 0          | 1                                          | 0.234         | 0(0-Inf)               |
| RECTOCELE, RECURRENT                                                       | 0                                       | 0          | 4                                          | 0.8839        | 0(0-Inf)               |
| RECTOCELE, RECURRENT, GR 1                                                 | 0                                       | 0          | 1                                          | 0.398         | 0(0-Inf)               |
| RECURRENT (TUMORS) NEOPLASMS MALIGNANT OTHER THAN<br>CARCINOMA             | 5                                       | 48.7177    | 132                                        | 63.5424       | 0.7667(0.3134-1.8759)  |
| REDUCED BUT STABLE RENAL ALLOGRAFT FUNCTION, POST<br>TRANSPLANT            | 1                                       | 7.0223     | 6                                          | 1.4782        | 4.7505(0.5599-40.3038) |
| REDUNDANT, ABDOMINAL SKIN                                                  | 1                                       | 7.1328     | 8                                          | 2.2008        | 3.241(0.3978-26.4025)  |
| REDUNDANT, ANUS                                                            | 0                                       | 0          | 11                                         | 3.3174        | 0(0-Inf)               |
| REDUNDANT, FORESKIN                                                        | 0                                       | 0          | 9                                          | 3.176         | 0(0-Inf)               |
| REDUNDANT, GINGIVAL TISSUE                                                 | 0                                       | 0          | 17                                         | 4.092         | 0(0-Inf)               |
| REDUNDANT, INTESTINE, NOS                                                  | 1                                       | 7.9888     | 69                                         | 24.138        | 0.331(0.0459-2.3883)   |
| REDUNDANT, LABIA                                                           | 0                                       | 0          | 2                                          | 0.5837        | 0(0-Inf)               |
| REDUNDANT, MITRAL VALVE                                                    | 0                                       | 0          | 2                                          | 1.1615        | 0(0-Inf)               |



| Description                                                 | No. of Positive Cases with Disease Code | Case Rate* | No. of Positive Controls with Disease Code | Control Rate* | Relative Risk (95%CI)  |
|-------------------------------------------------------------|-----------------------------------------|------------|--------------------------------------------|---------------|------------------------|
| REDUNDANT, PANNICULUS                                       | 0                                       | 0          | 3                                          | 0.9639        | 0(0-Inf)               |
| REDUNDANT, PREPUCE                                          | 0                                       | 0          | 3                                          | 0.7972        | 0(0-Inf)               |
| REDUNDANT, RECTUM                                           | 0                                       | 0          | 8                                          | 2.1059        | 0(0-Inf)               |
| REDUNDANT, SKIN, EYELIDS                                    | 3                                       | 21.0027    | 136                                        | 32.3544       | 0.6491(0.2063-2.0425)  |
| REDUNDANT, SKIN, FACE                                       | 1                                       | 7.5344     | 50                                         | 10.9808       | 0.6861(0.0944-4.9865)  |
| REDUNDANT, SKIN, NOS                                        | 2                                       | 14.906     | 51                                         | 11.2844       | 1.3209(0.3199-5.4543)  |
| REDUNDANT, STOMACH                                          | 0                                       | 0          | 1                                          | 0.234         | 0(0-Inf)               |
| REDUNDANT, TUBEROSITY                                       | 0                                       | 0          | 2                                          | 0.4681        | 0(0-Inf)               |
| REDUNDANT, UVULA                                            | 0                                       | 0          | 1                                          | 0.8891        | 0(0-Inf)               |
| REDUPLICATION DYSAMNESIA                                    | 0                                       | 0          | 1                                          | 0.8534        | 0(0-Inf)               |
| RE-ENTRY DYSFUNCTION (CARDIAC)-SEE ALSO CARDIAC DYSFUNCTION | 0                                       | 0          | 1                                          | 0.2354        | 0(0-Inf)               |
| REFLUX, BILE                                                | 1                                       | 7.8946     | 37                                         | 12.6884       | 0.6222(0.085-4.5526)   |
| REFLUX, ESOPHAGEAL                                          | 48                                      | 372.1424   | 1530                                       | 497.8717      | 0.7475(0.5604-0.9969)  |
| REFLUX, GASTRIC                                             | 18                                      | 127.7581   | 377                                        | 94.8407       | 1.3471(0.838-2.1655)   |
| REFLUX, GASTROESOPHAGEAL                                    | 119                                     | 1073.326   | 3314                                       | 1356.438      | 0.7913(0.6587-0.9505)  |
| REFLUX, URETERAL                                            | 0                                       | 0          | 6                                          | 2.2975        | 0(0-Inf)               |
| REFLUX, VESICoureTERAL                                      | 0                                       | 0          | 18                                         | 4.3246        | 0(0-Inf)               |
| REFRACTION CORRECTION (EYE)                                 | 1                                       | 6.939      | 44                                         | 10.8638       | 0.6387(0.0877-4.6541)  |
| REFUSAL TREATMENT FOR REASONS OF RELIGION OR CONSCIENCE     | 1                                       | 11.2105    | 0                                          | 0             | 7455366847.5626(0-Inf) |
| REGURGITATION, AORTIC, SEE ALSO INSUFFICIENCY               | 11                                      | 125.9819   | 198                                        | 120.5391      | 1.0452(0.5686-1.9212)  |
| REGURGITATION, MITRAL, RHEUMATIC, SEE ALSO INSUFFICIENCY    | 1                                       | 7.2975     | 10                                         | 2.912         | 2.506(0.3162-19.8609)  |
| REGURGITATION, MITRAL, SEE ALSO INSUFFICIENCY               | 28                                      | 292.2135   | 694                                        | 361.3344      | 0.8087(0.5538-1.1809)  |
| REGURGITATION, NOS (VOMITING#)                              | 1                                       | 7.663      | 40                                         | 12.9755       | 0.5906(0.0809-4.3118)  |
| REGURGITATION, PULMONARY VALVE                              | 0                                       | 0          | 9                                          | 4.2075        | 0(0-Inf)               |
| REGURGITATION, TRICUSPID, SEE ALSO INSUFFICIENCY            | 5                                       | 57.14      | 155                                        | 96.0029       | 0.5952(0.2439-1.4524)  |
| REJECTION, CORNEAL GRAFT                                    | 0                                       | 0          | 7                                          | 2.8368        | 0(0-Inf)               |
| REJECTION, TRANSPLANTED ORGAN/GRAFT-CODE ALSO COMPLICATION  | 3                                       | 20.8061    | 20                                         | 5.1098        | 4.0718(1.1967-13.8538) |
| RELAXATION, ANAL SPHINCTER                                  | 0                                       | 0          | 27                                         | 7.7233        | 0(0-Inf)               |
| RELAXATION, BLADDER SPHINCTER                               | 0                                       | 0          | 11                                         | 5.0418        | 0(0-Inf)               |
| RELAXATION, CARDIOESOPHAGEAL                                | 0                                       | 0          | 6                                          | 1.7736        | 0(0-Inf)               |
| RELAXATION, EYELIDS                                         | 6                                       | 63.0719    | 84                                         | 45.0178       | 1.401(0.6102-3.2171)   |
| RELAXATION, FACIAL SKIN                                     | 2                                       | 14.6465    | 33                                         | 7.3419        | 1.9949(0.4751-8.3773)  |
| RELAXATION, INGUINAL RING                                   | 1                                       | 6.9442     | 16                                         | 4.2287        | 1.6421(0.2163-12.4666) |
| RELAXATION, LIGAMENT, NEC/NOS                               | 0                                       | 0          | 12                                         | 3.2228        | 0(0-Inf)               |
| RELAXATION, MUSCLE                                          | 0                                       | 0          | 7                                          | 2.3234        | 0(0-Inf)               |
| RELAXATION, PELVIC (FLOOR)                                  | 6                                       | 87.238     | 398                                        | 177.1749      | 0.4924(0.2196-1.104)   |
| RELAXATION, PERINEUM                                        | 0                                       | 0          | 3                                          | 0.6536        | 0(0-Inf)               |

| Description                                                                    | No. of Positive Cases with Disease Code | Case Rate* | No. of Positive Controls with Disease Code | Control Rate* | Relative Risk (95%CI)    |
|--------------------------------------------------------------------------------|-----------------------------------------|------------|--------------------------------------------|---------------|--------------------------|
| RELAXATION, RECTUM                                                             | 0                                       | 0          | 2                                          | 0.4854        | 0(0-Inf)                 |
| RELAXATION, URETHRA                                                            | 1                                       | 9.0497     | 3                                          | 0.6805        | 13.2986(1.3296-133.0132) |
| RELAXATION, UTERUS                                                             | 0                                       | 0          | 3                                          | 0.6549        | 0(0-Inf)                 |
| RELAXATION, VAGINA                                                             | 0                                       | 0          | 5                                          | 1.1156        | 0(0-Inf)                 |
| REMNANT, CYSTIC DUCT                                                           | 0                                       | 0          | 1                                          | 0.398         | 0(0-Inf)                 |
| REMNANT, FINGERNAIL, NOS                                                       | 0                                       | 0          | 6                                          | 1.5506        | 0(0-Inf)                 |
| REMNANT, MENISCUS, KNEE                                                        | 0                                       | 0          | 2                                          | 0.6775        | 0(0-Inf)                 |
| REMNANT, THYROID                                                               | 0                                       | 0          | 4                                          | 0.9421        | 0(0-Inf)                 |
| REMNANT, TOENAIL, NOS                                                          | 0                                       | 0          | 3                                          | 0.6549        | 0(0-Inf)                 |
| REMNANT, URACHUS                                                               | 0                                       | 0          | 1                                          | 0.8877        | 0(0-Inf)                 |
| REMOVAL, CATHETER (HICKMAN) (LONG TERM VENOUS ACCESS)                          | 0                                       | 0          | 14                                         | 5.1169        | 0(0-Inf)                 |
| REMOVAL, CATHETER (URINARY) (INDWELLING) (DOUBLE-J)                            | 5                                       | 43.9792    | 140                                        | 58.0174       | 0.758(0.3101-1.8528)     |
| REMOVAL, EXTERNAL FIXATION DEVICE                                              | 0                                       | 0          | 27                                         | 8.1771        | 0(0-Inf)                 |
| REMOVAL, FRACTURE PLATE                                                        | 2                                       | 14.7296    | 9                                          | 2.0619        | 7.1437(1.5104-33.7883)   |
| REMOVAL, INTERNAL FIXATION DEVICE                                              | 3                                       | 20.8759    | 73                                         | 17.7003       | 1.1794(0.3702-3.7575)    |
| REMOVAL, INTRAUTERINE DEVICE (IUD)                                             | 0                                       | 0          | 3                                          | 0.8034        | 0(0-Inf)                 |
| REMOVAL, KIRSCHNER WIRE                                                        | 1                                       | 6.9669     | 33                                         | 8.062         | 0.8642(0.1176-6.3501)    |
| REMOVAL, MYRINGOTOMY TUBES                                                     | 1                                       | 6.9473     | 13                                         | 3.3417        | 2.079(0.2688-16.0786)    |
| REMOVAL, PACEMAKER                                                             | 0                                       | 0          | 1                                          | 0.2354        | 0(0-Inf)                 |
| REMOVAL, PLASTER CAST                                                          | 13                                      | 93.5462    | 222                                        | 60.622        | 1.5431(0.8798-2.7066)    |
| REMOVAL, POST-OPERATIVE FOREIGN BODY (ORTHOPEDIC)                              | 5                                       | 34.989     | 119                                        | 28.6148       | 1.2228(0.4982-3.0014)    |
| REMOVAL, RING FROM FINGER (BY PHYSICIAN/MEDICAL PERSONNEL)                     | 0                                       | 0          | 8                                          | 1.9749        | 0(0-Inf)                 |
| REMOVAL, SPLINT                                                                | 0                                       | 0          | 2                                          | 1.1972        | 0(0-Inf)                 |
| REMOVAL, STEINMANN PIN                                                         | 0                                       | 0          | 2                                          | 1.8981        | 0(0-Inf)                 |
| REMOVAL, STERNAL WIRE                                                          | 0                                       | 0          | 2                                          | 0.5474        | 0(0-Inf)                 |
| REMOVAL, SUTURE                                                                | 46                                      | 416.9711   | 923                                        | 385.6086      | 1.0813(0.8035-1.4552)    |
| REMOVAL, THERAPEUTIC DEVICES (PO DRAINS, PACKS, TUBES, PESSARY, PORT, ETC) NEC | 1                                       | 9.2458     | 95                                         | 42.3093       | 0.2185(0.0304-1.5694)    |
| REMOVAL, TOTAL JOINT                                                           | 0                                       | 0          | 5                                          | 2.3437        | 0(0-Inf)                 |
| RESIDUAL URINE                                                                 | 9                                       | 89.6166    | 219                                        | 107.7716      | 0.8315(0.4263-1.6218)    |
| RESISTANCE TO INSULIN                                                          | 0                                       | 0          | 53                                         | 16.673        | 0(0-Inf)                 |
| RESORPTION, BONE                                                               | 0                                       | 0          | 5                                          | 1.3717        | 0(0-Inf)                 |
| RESORPTION, JAW (ANY PART)                                                     | 2                                       | 13.9562    | 17                                         | 4.4           | 3.1719(0.7238-13.9002)   |
| RESORPTION, PERIODONTAL                                                        | 0                                       | 0          | 2                                          | 1.1974        | 0(0-Inf)                 |
| RESORPTION, TOOTH                                                              | 3                                       | 21.6717    | 105                                        | 30.3014       | 0.7152(0.2264-2.2593)    |
| RESPIRATION, CHEYNE-STOKES, CAUSE SPECIFIED                                    | 0                                       | 0          | 4                                          | 3.5521        | 0(0-Inf)                 |
| RESPIRATION, CHEYNE-STOKES, NOS                                                | 1                                       | 18.1128    | 13                                         | 14.3356       | 1.2635(0.1646-9.6976)    |
| RESPIRATION, SIGHING                                                           | 0                                       | 0          | 1                                          | 0.4049        | 0(0-Inf)                 |
| REST (PANCREATIC) SEE ALSO ACCESSORY                                           | 0                                       | 0          | 5                                          | 1.3909        | 0(0-Inf)                 |

| Description                                          | No. of Positive Cases with Disease Code | Case Rate* | No. of Positive Controls with Disease Code | Control Rate* | Relative Risk (95%CI)   |
|------------------------------------------------------|-----------------------------------------|------------|--------------------------------------------|---------------|-------------------------|
| RESTENOSIS, CORONARY ARTERY                          | 2                                       | 17.8436    | 48                                         | 20.217        | 0.8826(0.2138-3.6443)   |
| RESTENOSIS, MITRAL                                   | 0                                       | 0          | 2                                          | 0.5069        | 0(0-Inf)                |
| RESTLESSNESS                                         | 2                                       | 34.3647    | 40                                         | 43.6543       | 0.7872(0.1898-3.2642)   |
| RESTORATION CONTINUITY (POST STERILIZATION)          | 0                                       | 0          | 3                                          | 0.9283        | 0(0-Inf)                |
| RESUSCITATION, CARDIAC                               | 0                                       | 0          | 9                                          | 3.3019        | 0(0-Inf)                |
| RETAINED, HORN, MEDIAL MENISCUS                      | 0                                       | 0          | 6                                          | 3.2364        | 0(0-Inf)                |
| RETAINED, NAIL MATRIX                                | 0                                       | 0          | 2                                          | 0.5069        | 0(0-Inf)                |
| RETAINED, POLYETHYLENE TUBE, EAR                     | 0                                       | 0          | 20                                         | 7.6674        | 0(0-Inf)                |
| RETAINED, RECTAL STUMP                               | 0                                       | 0          | 3                                          | 0.9164        | 0(0-Inf)                |
| RETAINED, ROOTS                                      | 24                                      | 190.6471   | 567                                        | 191.4872      | 0.9956(0.6609-1.4997)   |
| RETAINED, TOOTH                                      | 0                                       | 0          | 38                                         | 13.7043       | 0(0-Inf)                |
| RETAINED, TOOTH, DECIDUOUS                           | 0                                       | 0          | 13                                         | 3.2455        | 0(0-Inf)                |
| RETARDATION, DEVELOPMENT                             | 0                                       | 0          | 2                                          | 1.0783        | 0(0-Inf)                |
| RETARDATION, MENTAL, BORDERLINE IQ 68-85, NOS        | 0                                       | 0          | 3                                          | 0.8034        | 0(0-Inf)                |
| RETARDATION, MENTAL, MILD IQ 52-67, NOS              | 0                                       | 0          | 10                                         | 2.387         | 0(0-Inf)                |
| RETARDATION, MENTAL, MODERATE IQ 36-51, NOS          | 0                                       | 0          | 3                                          | 0.6537        | 0(0-Inf)                |
| RETARDATION, MENTAL, NOS                             | 1                                       | 8.4666     | 29                                         | 6.879         | 1.2308(0.1667-9.0901)   |
| RETARDATION, MENTAL, PROFOUND IQ UNDER 20, NOS       | 0                                       | 0          | 4                                          | 0.967         | 0(0-Inf)                |
| RETARDATION, MENTAL, SEVERE IQ 20-35, NOS            | 1                                       | 7.3906     | 6                                          | 1.3378        | 5.5244(0.648-47.0956)   |
| RETARDATION, PSYCHOMOTOR                             | 0                                       | 0          | 4                                          | 4.8272        | 0(0-Inf)                |
| RETENTION, ANTRUM, STOMACH                           | 0                                       | 0          | 1                                          | 0.2354        | 0(0-Inf)                |
| RETENTION, CARBON DIOXIDE                            | 1                                       | 12.579     | 22                                         | 15.5418       | 0.8094(0.1086-6.0297)   |
| RETENTION, ESOPHAGEAL                                | 4                                       | 45.0809    | 5                                          | 2.9704        | 15.1765(3.9984-57.6051) |
| RETENTION, FLUID                                     | 3                                       | 21.0333    | 120                                        | 31.6381       | 0.6648(0.2109-2.0957)   |
| RETENTION, FOREIGN BODY, BONE                        | 0                                       | 0          | 1                                          | 0.2354        | 0(0-Inf)                |
| RETENTION, FOREIGN BODY, MUSCLE                      | 0                                       | 0          | 1                                          | 0.2729        | 0(0-Inf)                |
| RETENTION, FOREIGN BODY, SKIN                        | 0                                       | 0          | 3                                          | 0.7022        | 0(0-Inf)                |
| RETENTION, FOREIGN BODY, SOFT TISSUE                 | 0                                       | 0          | 10                                         | 2.5615        | 0(0-Inf)                |
| RETENTION, GASTRIC                                   | 7                                       | 58.6552    | 152                                        | 57.4927       | 1.0202(0.4771-2.1815)   |
| RETENTION, SECRETIONS, POST-OPERATIVE                | 2                                       | 18.1075    | 32                                         | 13.7616       | 1.3158(0.3138-5.518)    |
| RETENTION, SECRETIONS, RESPIRATORY, NOS              | 2                                       | 22.262     | 23                                         | 13.3802       | 1.6638(0.3901-7.0963)   |
| RETENTION, SODIUM                                    | 0                                       | 0          | 2                                          | 1.0782        | 0(0-Inf)                |
| RETENTION, URINE                                     | 63                                      | 890.41     | 1111                                       | 854.4275      | 1.0421(0.808-1.344)     |
| RETICULOHISTIOCYTOMA NOS                             | 0                                       | 0          | 1                                          | 0.2729        | 0(0-Inf)                |
| RETICULOHISTIOCYTOSIS MULTICENTRIC                   | 0                                       | 0          | 1                                          | 0.2729        | 0(0-Inf)                |
| RETICULOSARCOMA CODE ALSO LYMPHOMA MALIGNANT BY SITE | 0                                       | 0          | 1                                          | 0.8527        | 0(0-Inf)                |
| RETICULOSIS, DERMAL                                  | 0                                       | 0          | 2                                          | 0.4854        | 0(0-Inf)                |
| RETICULOSIS, NOS                                     | 0                                       | 0          | 1                                          | 0.3526        | 0(0-Inf)                |
| RETINAL CAPILLARY DROPOUT                            | 0                                       | 0          | 2                                          | 1.1971        | 0(0-Inf)                |
| RETINITIS, DIABETIC                                  | 0                                       | 0          | 1                                          | 0.3526        | 0(0-Inf)                |

| Description                                          | No. of Positive Cases with Disease Code | Case Rate* | No. of Positive Controls with Disease Code | Control Rate* | Relative Risk (95%CI)   |
|------------------------------------------------------|-----------------------------------------|------------|--------------------------------------------|---------------|-------------------------|
| RETINITIS, DIABETIC, PROLIFERATIVE                   | 0                                       | 0          | 1                                          | 0.2729        | 0(0-Inf)                |
| RETINITIS, NOS                                       | 0                                       | 0          | 4                                          | 1.0352        | 0(0-Inf)                |
| RETINITIS, PIGMENTOSA                                | 0                                       | 0          | 9                                          | 2.0964        | 0(0-Inf)                |
| RETINOCHOROIDITIS DUE TO TOXOPLASMOSIS               | 0                                       | 0          | 1                                          | 0.3526        | 0(0-Inf)                |
| RETINOPATHY, BACKGROUND                              | 20                                      | 166.967    | 404                                        | 151.6415      | 1.1011(0.7018-1.7274)   |
| RETINOPATHY, CENTRAL SEROUS                          | 0                                       | 0          | 13                                         | 3.3544        | 0(0-Inf)                |
| RETINOPATHY, DIABETIC                                | 25                                      | 203.4711   | 502                                        | 180.1675      | 1.1293(0.7548-1.6896)   |
| RETINOPATHY, DIABETIC, PROLIFERATIVE                 | 1                                       | 6.9472     | 83                                         | 20.5201       | 0.3386(0.047-2.4368)    |
| RETINOPATHY, HYPERTENSIVE                            | 2                                       | 16.2335    | 133                                        | 47.9889       | 0.3383(0.0836-1.3687)   |
| RETINOPATHY, ISCHEMIC                                | 0                                       | 0          | 4                                          | 1.2652        | 0(0-Inf)                |
| RETINOPATHY, NOS                                     | 2                                       | 15.7241    | 84                                         | 29.1375       | 0.5397(0.1325-2.1978)   |
| RETINOPATHY, OF PREMATURITY                          | 0                                       | 0          | 1                                          | 0.2729        | 0(0-Inf)                |
| RETINOPATHY, RUBELLA                                 | 0                                       | 0          | 1                                          | 0.234         | 0(0-Inf)                |
| RETINOPATHY, SOLAR                                   | 0                                       | 0          | 1                                          | 0.3526        | 0(0-Inf)                |
| RETINOPATHY, TOXIC                                   | 0                                       | 0          | 1                                          | 0.234         | 0(0-Inf)                |
| RETINOPATHY, VENOUS STASIS                           | 0                                       | 0          | 10                                         | 5.9923        | 0(0-Inf)                |
| RETINOSCHISIS, NEC                                   | 0                                       | 0          | 9                                          | 2.2917        | 0(0-Inf)                |
| RETINOSCHISIS, NOS                                   | 1                                       | 7.1858     | 56                                         | 16.1035       | 0.4462(0.0616-3.2324)   |
| RETRACTION, ATTIC                                    | 0                                       | 0          | 2                                          | 1.7755        | 0(0-Inf)                |
| RETRACTION, EAR DRUM                                 | 0                                       | 0          | 2                                          | 0.5069        | 0(0-Inf)                |
| RETRACTION, EYELID, CONGENITAL                       | 0                                       | 0          | 3                                          | 1.5104        | 0(0-Inf)                |
| RETRACTION, EYELID, NOS                              | 0                                       | 0          | 31                                         | 9.6552        | 0(0-Inf)                |
| RETRACTION, NIPPLE, NOS                              | 0                                       | 0          | 9                                          | 2.1291        | 0(0-Inf)                |
| RETRACTION, PALMAR FASCIA                            | 0                                       | 0          | 1                                          | 0.405         | 0(0-Inf)                |
| RETRACTION, SUPRACLAVICULAR                          | 0                                       | 0          | 1                                          | 0.4751        | 0(0-Inf)                |
| RETRACTION, TESTICLE                                 | 0                                       | 0          | 1                                          | 0.3526        | 0(0-Inf)                |
| RETRACTION, TYMPANUM                                 | 1                                       | 6.9274     | 28                                         | 7.138         | 0.9705(0.1314-7.1705)   |
| RETRACTION, VITREOUS                                 | 0                                       | 0          | 6                                          | 1.4354        | 0(0-Inf)                |
| RETROCECAL, APPENDIX (EPIPLOIC)                      | 0                                       | 0          | 2                                          | 0.6309        | 0(0-Inf)                |
| RETROFLEXION OF UTERUS                               | 0                                       | 0          | 3                                          | 0.8115        | 0(0-Inf)                |
| RETROGNATHIC, MANDIBLE (LOWER JAW)                   | 1                                       | 13.9741    | 34                                         | 10.6733       | 1.3093(0.1785-9.6052)   |
| RETROGNATHIC, MAXILLA (UPPER JAW)                    | 0                                       | 0          | 2                                          | 0.5475        | 0(0-Inf)                |
| RETROGRADE EJACULATION                               | 0                                       | 0          | 5                                          | 1.7636        | 0(0-Inf)                |
| RETROSPONDYLOLISTHESIS                               | 0                                       | 0          | 11                                         | 4.6963        | 0(0-Inf)                |
| RETROVERSION, UTERUS, NOS                            | 6                                       | 347.9208   | 36                                         | 32.5949       | 10.6741(4.4815-25.4239) |
| RETRUSION, MANDIBLE                                  | 1                                       | 10.117     | 0                                          | 0             | 14212506990.644(0-Inf)  |
| RETURN TO WORK EVALUATION/EXAMINATION                | 1                                       | 7.8182     | 106                                        | 23.9062       | 0.327(0.0456-2.3472)    |
| RHABDOMYOLYSIS (IDIOPATHIC)                          | 0                                       | 0          | 1                                          | 0.8877        | 0(0-Inf)                |
| RHABDOMYOLYSIS (NOS/IDIOPATHIC)                      | 1                                       | 17.1569    | 25                                         | 26.0574       | 0.6584(0.089-4.8716)    |
| RHABDOMYOMA, NOS, CODE ALSO NEOPLASM, BENIGN BY SITE | 0                                       | 0          | 1                                          | 0.234         | 0(0-Inf)                |

| Description                                     | No. of Positive<br>Cases with<br>Disease Code | Case<br>Rate* | No. of Positive<br>Controls with<br>Disease Code | Control<br>Rate* | Relative Risk (95%CI)  |
|-------------------------------------------------|-----------------------------------------------|---------------|--------------------------------------------------|------------------|------------------------|
| RHEUMATISM, JOINT                               | 0                                             | 0             | 1                                                | 0.405            | 0(0-Inf)               |
| RHEUMATISM, MUSCULAR                            | 0                                             | 0             | 3                                                | 0.802            | 0(0-Inf)               |
| RHEUMATISM, NOS                                 | 0                                             | 0             | 27                                               | 6.4023           | 0(0-Inf)               |
| RHEUMATISM, PALINDROMIC                         | 0                                             | 0             | 5                                                | 1.4453           | 0(0-Inf)               |
| RHEUMATISM, POLYARTICULAR                       | 1                                             | 11.7365       | 0                                                | 0                | 8844771080.4455(0-Inf) |
| RHEUMATISM, PSYCHOGENIC, CODE ALSO RHEUMATISM   | 0                                             | 0             | 6                                                | 2.1398           | 0(0-Inf)               |
| RHEUMATOID, FACTOR, NEGATIVE                    | 0                                             | 0             | 3                                                | 1.5756           | 0(0-Inf)               |
| RHEUMATOID, FACTOR, POSITIVE                    | 0                                             | 0             | 26                                               | 6.3408           | 0(0-Inf)               |
| RHEUMATOID, LUNG                                | 1                                             | 8.4166        | 11                                               | 4.2139           | 1.9973(0.2551-15.6387) |
| RHINITIS, ACUTE                                 | 0                                             | 0             | 15                                               | 3.6257           | 0(0-Inf)               |
| RHINITIS, ALLERGIC, ANY CAUSE--ALRH             | 50                                            | 364.7624      | 1904                                             | 484.239          | 0.7533(0.5685-0.9981)  |
| RHINITIS, ATROPHIC                              | 1                                             | 7.017         | 21                                               | 5.4463           | 1.2884(0.1719-9.6579)  |
| RHINITIS, BACTERIAL                             | 0                                             | 0             | 2                                                | 0.4681           | 0(0-Inf)               |
| RHINITIS, INFECTIVE                             | 0                                             | 0             | 1                                                | 0.2354           | 0(0-Inf)               |
| RHINITIS, NOS                                   | 52                                            | 391.9803      | 1374                                             | 420.1676         | 0.9329(0.7067-1.2315)  |
| RHINITIS, PERENNIAL/SEASONAL                    | 4                                             | 30.2206       | 165                                              | 52.4895          | 0.5757(0.2132-1.555)   |
| RHINITIS, SICCA                                 | 0                                             | 0             | 7                                                | 1.6618           | 0(0-Inf)               |
| RHINITIS, VASOMOTOR,--VMR                       | 72                                            | 536.0102      | 2190                                             | 610.3947         | 0.8781(0.694-1.1112)   |
| RHINITIS, VIRAL                                 | 1                                             | 13.1048       | 22                                               | 6.4394           | 2.0351(0.2725-15.1991) |
| RHINOPHARYNGITIS, NOS, SEE ALSO NASOPHARYNGITIS | 0                                             | 0             | 2                                                | 0.5709           | 0(0-Inf)               |
| RHINOPHYMA                                      | 5                                             | 43.3423       | 62                                               | 25.5182          | 1.6985(0.6805-4.2391)  |
| RHINORRHEA, CEREBROSPINAL FLUID                 | 0                                             | 0             | 7                                                | 1.6559           | 0(0-Inf)               |
| RHINORRHEA, NOS                                 | 9                                             | 76.7402       | 140                                              | 54.2131          | 1.4155(0.7195-2.7848)  |
| RHINOSINUSITIS, ACUTE                           | 1                                             | 6.9351        | 108                                              | 27.8138          | 0.2493(0.0348-1.7888)  |
| RHINOSINUSITIS, CHRONIC                         | 0                                             | 0             | 113                                              | 33.4379          | 0(0-Inf)               |
| RHYTHM DISORDER, A-V NODAL                      | 0                                             | 0             | 1                                                | 0.8877           | 0(0-Inf)               |
| RHYTHM DISORDER, CARDIAC, NOS                   | 6                                             | 81.9607       | 72                                               | 55.7384          | 1.4705(0.6377-3.3908)  |
| RHYTHM DISORDER, ESCAPE                         | 0                                             | 0             | 17                                               | 13.6073          | 0(0-Inf)               |
| RHYTHM DISORDER, IDIOVENTRICULAR                | 0                                             | 0             | 6                                                | 4.1744           | 0(0-Inf)               |
| RHYTIDOSIS-SEE ALSO WRINKLES                    | 1                                             | 13.7907       | 37                                               | 17.2096          | 0.8013(0.1094-5.8712)  |
| RICKETS, LATE EFFECT OF                         | 0                                             | 0             | 1                                                | 0.398            | 0(0-Inf)               |
| RIDGING NAIL                                    | 0                                             | 0             | 6                                                | 1.6231           | 0(0-Inf)               |
| RIEDEL'S LOBE LIVER                             | 0                                             | 0             | 6                                                | 1.6244           | 0(0-Inf)               |
| RIGHT SIDED AORTIC ARCH                         | 0                                             | 0             | 4                                                | 0.9237           | 0(0-Inf)               |
| RIGID HABITUS                                   | 0                                             | 0             | 1                                                | 0.4048           | 0(0-Inf)               |
| RIGIDITY, MUSCLE                                | 2                                             | 30.3593       | 27                                               | 24.3012          | 1.2493(0.296-5.2724)   |
| RIGIDITY, NUCHAL                                | 0                                             | 0             | 2                                                | 0.4708           | 0(0-Inf)               |
| RIND (REVERSIBLE ISCHEMIC NEUROLOGIC DEFICIT)   | 0                                             | 0             | 19                                               | 12.1885          | 0(0-Inf)               |
| RING, LOWER ESOPHAGEAL                          | 9                                             | 77.0119       | 179                                              | 69.9512          | 1.1009(0.5625-2.1549)  |
| RING, RUST, CORNEA                              | 1                                             | 7.9624        | 37                                               | 10.1067          | 0.7878(0.1078-5.7593)  |

| Description                                | No. of Positive Cases with Disease Code | Case Rate* | No. of Positive Controls with Disease Code | Control Rate* | Relative Risk (95%CI)    |
|--------------------------------------------|-----------------------------------------|------------|--------------------------------------------|---------------|--------------------------|
| RING, SCHATZKI'S, (ESOPHAGEAL), CONGENITAL | 0                                       | 0          | 18                                         | 4.6624        | 0(0-Inf)                 |
| RING, SCHATZKI'S, (ESOPHAGEAL), NOS        | 14                                      | 130.8987   | 355                                        | 160.1465      | 0.8174(0.4786-1.396)     |
| RING, VASCULAR                             | 0                                       | 0          | 1                                          | 1.036         | 0(0-Inf)                 |
| RINGED SIDEROBLAST                         | 0                                       | 0          | 1                                          | 0.4048        | 0(0-Inf)                 |
| RINGWORM (SEE ALSO DERMATOPHYTOSIS)        | 1                                       | 7.3463     | 23                                         | 5.6284        | 1.3052(0.1752-9.7255)    |
| ROSACEA, GRANULOMATOUS                     | 0                                       | 0          | 13                                         | 4.0164        | 0(0-Inf)                 |
| ROSACEA, KERATITIS                         | 1                                       | 7.1919     | 0                                          | 0             | 12737439063.6173(0-Inf)  |
| ROSACEA, NOS                               | 26                                      | 186.1889   | 868                                        | 239.6483      | 0.7769(0.5255-1.1487)    |
| ROTAVIRUS                                  | 0                                       | 0          | 1                                          | 0.4048        | 0(0-Inf)                 |
| RUB (PRECORDIAL)                           | 0                                       | 0          | 12                                         | 9.0139        | 0(0-Inf)                 |
| RUBEOSIS IRIDIS                            | 0                                       | 0          | 25                                         | 8.4469        | 0(0-Inf)                 |
| RUDIMENTARY, LOBULE, EAR                   | 0                                       | 0          | 1                                          | 0.2354        | 0(0-Inf)                 |
| RUMINATION                                 | 1                                       | 10.5723    | 3                                          | 1.6558        | 6.3851(0.6465-63.0603)   |
| RUPTURE, ACHILLES TENDON                   | 3                                       | 21.2384    | 49                                         | 12.4034       | 1.7123(0.5313-5.5182)    |
| RUPTURE, ACHILLES TENDON, LATE EFFECT      | 0                                       | 0          | 5                                          | 1.34          | 0(0-Inf)                 |
| RUPTURE, AORTA, NONTRAUMATIC               | 0                                       | 0          | 2                                          | 1.1613        | 0(0-Inf)                 |
| RUPTURE, APPENDIX, NONTRAUMATIC            | 0                                       | 0          | 3                                          | 1.3866        | 0(0-Inf)                 |
| RUPTURE, ARTERY, NONTRAUMATIC              | 0                                       | 0          | 1                                          | 0.2729        | 0(0-Inf)                 |
| RUPTURE, BLOOD VESSEL, NONTRAUMATIC        | 0                                       | 0          | 8                                          | 1.8738        | 0(0-Inf)                 |
| RUPTURE, CARTILAGE, KNEE                   | 0                                       | 0          | 6                                          | 1.4245        | 0(0-Inf)                 |
| RUPTURE, CHORDAE TENDINEAE                 | 0                                       | 0          | 11                                         | 5.0873        | 0(0-Inf)                 |
| RUPTURE, CHOROID, NONTRAUMATIC             | 0                                       | 0          | 1                                          | 0.2729        | 0(0-Inf)                 |
| RUPTURE, CORPUS LUTEUM                     | 0                                       | 0          | 1                                          | 0.8275        | 0(0-Inf)                 |
| RUPTURE, DESCMET'S MEMBRANE                | 0                                       | 0          | 2                                          | 1.7762        | 0(0-Inf)                 |
| RUPTURE, DISC, NEC, SEE ALSO HERNIA, DISC  | 0                                       | 0          | 1                                          | 0.234         | 0(0-Inf)                 |
| RUPTURE, DIVERTICULUM, INTESTINE, NOS      | 0                                       | 0          | 1                                          | 0.3526        | 0(0-Inf)                 |
| RUPTURE, ESOPHAGUS, NONTRAUMATIC           | 0                                       | 0          | 4                                          | 2.3943        | 0(0-Inf)                 |
| RUPTURE, FALLOPIAN TUBE, NONTRAUMATIC      | 0                                       | 0          | 1                                          | 0.8276        | 0(0-Inf)                 |
| RUPTURE, GLOBE, NONTRAUMATIC               | 0                                       | 0          | 1                                          | 0.4049        | 0(0-Inf)                 |
| RUPTURE, GLOBE, TRAUMATIC                  | 0                                       | 0          | 3                                          | 1.5117        | 0(0-Inf)                 |
| RUPTURE, INTESTINE, NONTRAUMATIC           | 1                                       | 7.0471     | 2                                          | 0.5605        | 12.5719(1.0955-144.2749) |
| RUPTURE, KIDNEY, NONTRAUMATIC              | 0                                       | 0          | 1                                          | 0.2729        | 0(0-Inf)                 |
| RUPTURE, LIGAMENT, ACROMIOCLAVICULAR       | 0                                       | 0          | 3                                          | 1.4256        | 0(0-Inf)                 |
| RUPTURE, LIGAMENT, ANKLE                   | 2                                       | 19.3293    | 40                                         | 10.9027       | 1.7729(0.4263-7.373)     |
| RUPTURE, LIGAMENT, ANKLE, OLD              | 0                                       | 0          | 2                                          | 0.4681        | 0(0-Inf)                 |
| RUPTURE, LIGAMENT, CARPOMETACARPAL         | 0                                       | 0          | 1                                          | 0.2729        | 0(0-Inf)                 |
| RUPTURE, LIGAMENT, CHEST                   | 0                                       | 0          | 2                                          | 0.6774        | 0(0-Inf)                 |
| RUPTURE, LIGAMENT, CHONDROCOSTAL           | 1                                       | 9.139      | 2                                          | 0.5418        | 16.8678(1.4691-193.671)  |
| RUPTURE, LIGAMENT, COLLATERAL (LEG#)       | 2                                       | 18.9947    | 54                                         | 14.3295       | 1.3256(0.3219-5.4587)    |
| RUPTURE, LIGAMENT, COLLATERAL, OLD         | 0                                       | 0          | 7                                          | 1.6868        | 0(0-Inf)                 |

| Description                                                   | No. of Positive Cases with Disease Code | Case Rate* | No. of Positive Controls with Disease Code | Control Rate* | Relative Risk (95%CI)    |
|---------------------------------------------------------------|-----------------------------------------|------------|--------------------------------------------|---------------|--------------------------|
| RUPTURE, LIGAMENT, CRUCIATE                                   | 2                                       | 20.2537    | 63                                         | 17.5499       | 1.1541(0.2814-4.7322)    |
| RUPTURE, LIGAMENT, CRUCIATE, OLD                              | 0                                       | 0          | 15                                         | 3.9552        | 0(0-Inf)                 |
| RUPTURE, LIGAMENT, ELBOW                                      | 0                                       | 0          | 2                                          | 0.5474        | 0(0-Inf)                 |
| RUPTURE, LIGAMENT, FEMORAL, NOS                               | 0                                       | 0          | 1                                          | 0.234         | 0(0-Inf)                 |
| RUPTURE, LIGAMENT, FINGER                                     | 3                                       | 22.6052    | 32                                         | 7.9795        | 2.8329(0.8613-9.3173)    |
| RUPTURE, LIGAMENT, FOOT                                       | 1                                       | 9.2917     | 3                                          | 0.7853        | 11.8315(1.1882-117.8112) |
| RUPTURE, LIGAMENT, FOREARM                                    | 0                                       | 0          | 1                                          | 0.2354        | 0(0-Inf)                 |
| RUPTURE, LIGAMENT, HAND                                       | 0                                       | 0          | 2                                          | 0.5069        | 0(0-Inf)                 |
| RUPTURE, LIGAMENT, HIP                                        | 0                                       | 0          | 1                                          | 0.234         | 0(0-Inf)                 |
| RUPTURE, LIGAMENT, INTERPHALANGEAL, HAND                      | 0                                       | 0          | 1                                          | 0.398         | 0(0-Inf)                 |
| RUPTURE, LIGAMENT, KNEE                                       | 0                                       | 0          | 19                                         | 4.6367        | 0(0-Inf)                 |
| RUPTURE, LIGAMENT, KNEE, OLD                                  | 0                                       | 0          | 4                                          | 1.8405        | 0(0-Inf)                 |
| RUPTURE, LIGAMENT, METACARPOPHALANGEAL                        | 0                                       | 0          | 11                                         | 2.8863        | 0(0-Inf)                 |
| RUPTURE, LIGAMENT, NOS                                        | 0                                       | 0          | 1                                          | 0.2729        | 0(0-Inf)                 |
| RUPTURE, LIGAMENT, PATELLAR                                   | 0                                       | 0          | 1                                          | 0.234         | 0(0-Inf)                 |
| RUPTURE, LIGAMENT, RADIO-ULNAR, NOS                           | 0                                       | 0          | 2                                          | 0.5709        | 0(0-Inf)                 |
| RUPTURE, LIGAMENT, SHOULDER                                   | 2                                       | 13.8872    | 8                                          | 2.0231        | 6.8645(1.4292-32.9695)   |
| RUPTURE, LIGAMENT, SHOULDER, OLD                              | 0                                       | 0          | 6                                          | 1.4562        | 0(0-Inf)                 |
| RUPTURE, LIGAMENT, SPINE                                      | 0                                       | 0          | 6                                          | 1.5076        | 0(0-Inf)                 |
| RUPTURE, LIGAMENT, SPINE, OLD                                 | 0                                       | 0          | 2                                          | 0.4708        | 0(0-Inf)                 |
| RUPTURE, LIGAMENT, TEMPOROMANDIBULAR                          | 0                                       | 0          | 2                                          | 0.5837        | 0(0-Inf)                 |
| RUPTURE, LIGAMENT, TIBIOFIBULAR, DISTAL                       | 0                                       | 0          | 3                                          | 0.7799        | 0(0-Inf)                 |
| RUPTURE, LIGAMENT, TIBIOFIBULAR, NOS                          | 0                                       | 0          | 3                                          | 0.9285        | 0(0-Inf)                 |
| RUPTURE, LIGAMENT, TIBIOFIBULAR, PROXIMAL                     | 1                                       | 6.9404     | 1                                          | 0.2545        | 27.271(1.6072-462.7473)  |
| RUPTURE, LIGAMENT, TOE                                        | 0                                       | 0          | 1                                          | 0.234         | 0(0-Inf)                 |
| RUPTURE, LIGAMENT, VERTEBRA, DORSAL                           | 0                                       | 0          | 1                                          | 0.4751        | 0(0-Inf)                 |
| RUPTURE, LIGAMENT, VERTEBRA, LUMBAR                           | 0                                       | 0          | 1                                          | 0.3526        | 0(0-Inf)                 |
| RUPTURE, LIGAMENT, WRIST                                      | 0                                       | 0          | 27                                         | 7.0282        | 0(0-Inf)                 |
| RUPTURE, LIGAMENT, WRIST, OLD                                 | 1                                       | 7.0715     | 7                                          | 1.7337        | 4.0788(0.4929-33.7494)   |
| RUPTURE, MEMBRANES, PREMATURE (PRIOR TO LABOR), WITH DELIVERY | 0                                       | 0          | 5                                          | 2.2888        | 0(0-Inf)                 |
| RUPTURE, MENISCUS, KNEE                                       | 0                                       | 0          | 6                                          | 1.8167        | 0(0-Inf)                 |
| RUPTURE, MITRAL VALVE, CHORDAE                                | 0                                       | 0          | 22                                         | 12.7372       | 0(0-Inf)                 |
| RUPTURE, MUSCLE, ABDOMINAL                                    | 0                                       | 0          | 1                                          | 2.4885        | 0(0-Inf)                 |
| RUPTURE, MUSCLE, ANKLE                                        | 1                                       | 9.0337     | 16                                         | 4.182         | 2.1601(0.2838-16.4393)   |
| RUPTURE, MUSCLE, ANKLE, OLD                                   | 0                                       | 0          | 1                                          | 0.3527        | 0(0-Inf)                 |
| RUPTURE, MUSCLE, BRACHIAL                                     | 0                                       | 0          | 7                                          | 1.8056        | 0(0-Inf)                 |
| RUPTURE, MUSCLE, CALF                                         | 2                                       | 13.9392    | 20                                         | 5.1279        | 2.7183(0.63-11.7296)     |
| RUPTURE, MUSCLE, CHEST                                        | 0                                       | 0          | 3                                          | 0.8115        | 0(0-Inf)                 |
| RUPTURE, MUSCLE, ELBOW                                        | 1                                       | 6.8923     | 5                                          | 1.3473        | 5.1157(0.5877-44.5332)   |

| Description                                 | No. of Positive Cases with Disease Code | Case Rate* | No. of Positive Controls with Disease Code | Control Rate* | Relative Risk (95%CI)  |
|---------------------------------------------|-----------------------------------------|------------|--------------------------------------------|---------------|------------------------|
| RUPTURE, MUSCLE, FEMUR (FEMORIS)            | 0                                       | 0          | 2                                          | 0.6776        | 0(0-Inf)               |
| RUPTURE, MUSCLE, FIBULA                     | 0                                       | 0          | 2                                          | 1.0784        | 0(0-Inf)               |
| RUPTURE, MUSCLE, FINGER                     | 4                                       | 27.9978    | 106                                        | 26.4136       | 1.06(0.3895-2.8846)    |
| RUPTURE, MUSCLE, FINGER, OLD                | 1                                       | 9.2235     | 8                                          | 2.1875        | 4.2164(0.5193-34.2377) |
| RUPTURE, MUSCLE, FOOT                       | 1                                       | 9.5626     | 18                                         | 4.7041        | 2.0328(0.2691-15.3583) |
| RUPTURE, MUSCLE, FOOT, OLD                  | 0                                       | 0          | 1                                          | 0.234         | 0(0-Inf)               |
| RUPTURE, MUSCLE, FOREARM                    | 0                                       | 0          | 6                                          | 1.515         | 0(0-Inf)               |
| RUPTURE, MUSCLE, GASTROCNEMIUS              | 3                                       | 27.0703    | 69                                         | 19.0544       | 1.4207(0.4457-4.5282)  |
| RUPTURE, MUSCLE, GLUTEUS                    | 0                                       | 0          | 8                                          | 2.2112        | 0(0-Inf)               |
| RUPTURE, MUSCLE, HAMSTRING                  | 1                                       | 7.2496     | 19                                         | 4.618         | 1.5699(0.2085-11.8205) |
| RUPTURE, MUSCLE, HAND                       | 0                                       | 0          | 10                                         | 3.0459        | 0(0-Inf)               |
| RUPTURE, MUSCLE, HIP                        | 0                                       | 0          | 3                                          | 0.7885        | 0(0-Inf)               |
| RUPTURE, MUSCLE, INTERCOSTAL                | 0                                       | 0          | 2                                          | 0.8723        | 0(0-Inf)               |
| RUPTURE, MUSCLE, INTERPHALANGEAL (HAND#)    | 0                                       | 0          | 1                                          | 0.398         | 0(0-Inf)               |
| RUPTURE, MUSCLE, LATISSIMUS DORSI           | 0                                       | 0          | 1                                          | 0.3526        | 0(0-Inf)               |
| RUPTURE, MUSCLE, LOWER EXTREMITY, NOS       | 3                                       | 21.3146    | 37                                         | 10.4187       | 2.0458(0.6269-6.676)   |
| RUPTURE, MUSCLE, LOWER EXTREMITY, OLD       | 2                                       | 14.1538    | 4                                          | 1.0269        | 13.7829(2.4608-77.197) |
| RUPTURE, MUSCLE, NON-TRAUMATIC              | 0                                       | 0          | 19                                         | 6.635         | 0(0-Inf)               |
| RUPTURE, MUSCLE, NOS                        | 0                                       | 0          | 3                                          | 0.9608        | 0(0-Inf)               |
| RUPTURE, MUSCLE, PECTORAL                   | 0                                       | 0          | 1                                          | 0.3526        | 0(0-Inf)               |
| RUPTURE, MUSCLE, QUADRICEPS                 | 0                                       | 0          | 33                                         | 12.1497       | 0(0-Inf)               |
| RUPTURE, MUSCLE, ROTATOR CUFF               | 1                                       | 7.0222     | 10                                         | 2.7211        | 2.5807(0.3261-20.4241) |
| RUPTURE, MUSCLE, SCAPULAR                   | 0                                       | 0          | 7                                          | 2.1269        | 0(0-Inf)               |
| RUPTURE, MUSCLE, SHOULDER                   | 1                                       | 7.0374     | 64                                         | 17.9099       | 0.3929(0.0544-2.8377)  |
| RUPTURE, MUSCLE, SOLEUS                     | 0                                       | 0          | 3                                          | 1.0581        | 0(0-Inf)               |
| RUPTURE, MUSCLE, SPINE                      | 0                                       | 0          | 2                                          | 0.4854        | 0(0-Inf)               |
| RUPTURE, MUSCLE, STERNOCLEIDOMASTOID        | 0                                       | 0          | 1                                          | 0.398         | 0(0-Inf)               |
| RUPTURE, MUSCLE, THIGH                      | 1                                       | 6.9351     | 4                                          | 1.04          | 6.6687(0.7249-61.3447) |
| RUPTURE, MUSCLE, THUMB                      | 3                                       | 21.5038    | 30                                         | 7.4275        | 2.8952(0.8769-9.5588)  |
| RUPTURE, MUSCLE, TIBIA                      | 0                                       | 0          | 27                                         | 7.5001        | 0(0-Inf)               |
| RUPTURE, MUSCLE, TRICEPS (ARM)              | 1                                       | 6.9881     | 13                                         | 3.225         | 2.1668(0.2804-16.7464) |
| RUPTURE, MUSCLE, UPPER ARM (BICEPS)         | 1                                       | 8.4536     | 151                                        | 59.5405       | 0.142(0.0199-1.0153)   |
| RUPTURE, MUSCLE, UPPER EXTREMITY, NOS       | 1                                       | 7.8741     | 17                                         | 5.8332        | 1.3499(0.1783-10.222)  |
| RUPTURE, MUSCLE, UPPER EXTREMITY, OLD       | 1                                       | 6.937      | 5                                          | 1.2808        | 5.4163(0.6172-47.5278) |
| RUPTURE, MUSCLE, WRIST                      | 0                                       | 0          | 14                                         | 4.2572        | 0(0-Inf)               |
| RUPTURE, MUSCLE, WRIST, OLD                 | 0                                       | 0          | 1                                          | 0.3526        | 0(0-Inf)               |
| RUPTURE, MUSCLOTENDINOUS CUFF, NONTRAUMATIC | 0                                       | 0          | 2                                          | 0.571         | 0(0-Inf)               |
| RUPTURE, MYOCARDIUM, NONTRAUMATIC           | 0                                       | 0          | 1                                          | 0.3526        | 0(0-Inf)               |
| RUPTURE, OVARY                              | 0                                       | 0          | 1                                          | 0.234         | 0(0-Inf)               |
| RUPTURE, PANCREAS, NONTRAUMATIC             | 0                                       | 0          | 1                                          | 2.4861        | 0(0-Inf)               |



| Description                                             | No. of Positive Cases with Disease Code | Case Rate* | No. of Positive Controls with Disease Code | Control Rate* | Relative Risk (95%CI)    |
|---------------------------------------------------------|-----------------------------------------|------------|--------------------------------------------|---------------|--------------------------|
| RUPTURE, PAPILLARY MUSCLE                               | 0                                       | 0          | 4                                          | 1.8404        | 0(0-Inf)                 |
| RUPTURE, PAPILLARY MUSCLE, OLD                          | 0                                       | 0          | 1                                          | 2.4855        | 0(0-Inf)                 |
| RUPTURE, RETINA, NONTRAUMATIC                           | 0                                       | 0          | 1                                          | 0.3527        | 0(0-Inf)                 |
| RUPTURE, ROTATOR CUFF, DEGENERATIVE                     | 1                                       | 6.975      | 49                                         | 12.2443       | 0.5697(0.0784-4.1383)    |
| RUPTURE, ROTATOR CUFF, NONTRAUMATIC                     | 1                                       | 7.356      | 16                                         | 4.9396        | 1.4892(0.196-11.3147)    |
| RUPTURE, ROTATOR CUFF, NOS                              | 1                                       | 7.4889     | 18                                         | 5.6346        | 1.3291(0.1761-10.0329)   |
| RUPTURE, ROTATOR CUFF, TRAUMATIC, OLD/LATE EFFECT       | 2                                       | 14.2433    | 7                                          | 1.7057        | 8.3502(1.696-41.1121)    |
| RUPTURE, SCLERA, NONTRAUMATIC                           | 0                                       | 0          | 1                                          | 0.3526        | 0(0-Inf)                 |
| RUPTURE, SPLEEN, NONTRAUMATIC                           | 0                                       | 0          | 3                                          | 1.2105        | 0(0-Inf)                 |
| RUPTURE, STOMACH, NONTRAUMATIC                          | 0                                       | 0          | 2                                          | 1.1613        | 0(0-Inf)                 |
| RUPTURE, TENDON, NONTRAUMATIC                           | 1                                       | 6.9577     | 46                                         | 11.6706       | 0.5962(0.0819-4.3376)    |
| RUPTURE, TENDON, NOS, CODE ALSO RUPTURE, MUSCLE BY SITE | 5                                       | 35.416     | 260                                        | 73.7413       | 0.4803(0.198-1.165)      |
| RUPTURE, TUBE WITH PREGNANCY                            | 1                                       | 28.2337    | 0                                          | 0             | 54185058635.568(0-Inf)   |
| RUPTURE, TYMPANUM, NONTRAUMATIC                         | 0                                       | 0          | 20                                         | 6.2967        | 0(0-Inf)                 |
| RUPTURE, URETER, NONTRAUMATIC                           | 1                                       | 6.8832     | 0                                          | 0             | 12230274177.3502(0-Inf)  |
| RUPTURE, URETHRA, NONTRAUMATIC                          | 0                                       | 0          | 3                                          | 1.387         | 0(0-Inf)                 |
| RUPTURE, UTERUS, NONTRAUMATIC                           | 0                                       | 0          | 1                                          | 0.2354        | 0(0-Inf)                 |
| RUPTURE, VARICOSITY, LOWER EXTREMITY                    | 1                                       | 9.7893     | 9                                          | 2.1769        | 4.4969(0.5601-36.1033)   |
| RUPTURE, VARIX, LOWER EXTREMITY                         | 1                                       | 7.0694     | 9                                          | 2.0653        | 3.4229(0.4258-27.5188)   |
| RUPTURE, VENA CAVA                                      | 0                                       | 0          | 1                                          | 2.4855        | 0(0-Inf)                 |
| RUPTURE, VISCUS                                         | 0                                       | 0          | 6                                          | 2.7532        | 0(0-Inf)                 |
| SACCULATION, BLADDER                                    | 1                                       | 33.079     | 1                                          | 2.3022        | 14.3686(0.8898-232.0372) |
| SACCULATION, COLON (ANY PART)                           | 0                                       | 0          | 1                                          | 0.2354        | 0(0-Inf)                 |
| SACRALIZATION                                           | 0                                       | 0          | 8                                          | 3.9915        | 0(0-Inf)                 |
| SACROILIITIS                                            | 5                                       | 37.0763    | 80                                         | 24.1367       | 1.5361(0.6196-3.8081)    |
| SALICYLISM                                              | 0                                       | 0          | 3                                          | 1.2109        | 0(0-Inf)                 |
| SALMONELLOSIS, NOS                                      | 0                                       | 0          | 28                                         | 7.971         | 0(0-Inf)                 |
| SALPINGITIS, ACUTE                                      | 0                                       | 0          | 1                                          | 0.234         | 0(0-Inf)                 |
| SALPINGITIS, CHRONIC                                    | 0                                       | 0          | 7                                          | 1.9681        | 0(0-Inf)                 |
| SALPINGITIS, ISTHMICA NODOSA                            | 0                                       | 0          | 2                                          | 1.1378        | 0(0-Inf)                 |
| SALPINGITIS, NOS                                        | 0                                       | 0          | 2                                          | 0.432         | 0(0-Inf)                 |
| SALPINGITIS, SUBACUTE                                   | 0                                       | 0          | 1                                          | 0.234         | 0(0-Inf)                 |
| SARCOID, BOECK, NOS                                     | 0                                       | 0          | 1                                          | 0.4751        | 0(0-Inf)                 |
| SARCOID, BOECK, TRUNK                                   | 0                                       | 0          | 2                                          | 0.471         | 0(0-Inf)                 |
| SARCOID, CNS INVOLVEMENT                                | 0                                       | 0          | 4                                          | 0.952         | 0(0-Inf)                 |
| SARCOID, NOS                                            | 0                                       | 0          | 37                                         | 8.8552        | 0(0-Inf)                 |
| SARCOID, NOS, HEAD                                      | 0                                       | 0          | 4                                          | 0.9708        | 0(0-Inf)                 |
| SARCOID, NOS, NECK                                      | 0                                       | 0          | 2                                          | 0.5709        | 0(0-Inf)                 |
| SARCOID, NOS, TRUNK                                     | 0                                       | 0          | 11                                         | 2.6223        | 0(0-Inf)                 |
| SARCOID, NOS, UPPER EXTREMITY                           | 0                                       | 0          | 1                                          | 0.4751        | 0(0-Inf)                 |

| Description                                                 | No. of Positive Cases with Disease Code | Case Rate* | No. of Positive Controls with Disease Code | Control Rate* | Relative Risk (95%CI)   |
|-------------------------------------------------------------|-----------------------------------------|------------|--------------------------------------------|---------------|-------------------------|
| SARCOIDOSIS (SEE ALSO SARCOID FOR TYPE SPECIFIED)           | 3                                       | 24.7548    | 68                                         | 16.162        | 1.5317(0.4799-4.8889)   |
| SARCOMA, MULLERIAN, CODE ALSO NEOPLASM MALIGNANT BY SITE    | 0                                       | 0          | 1                                          | 1.9059        | 0(0-Inf)                |
| SARCOMA, NOS, CODE ALSO NEOPLASM, MALIGNANT BY SITE         | 0                                       | 0          | 24                                         | 8.1154        | 0(0-Inf)                |
| SARCOMA, OSTEOGENIC, CODE ALSO NEOPLASM, MALIGNANT BY SITE  | 0                                       | 0          | 1                                          | 0.2354        | 0(0-Inf)                |
| SARCOMA, SPINDLE CELL, CODE ALSO NEOPLASM MALIGNANT BY SITE | 0                                       | 0          | 3                                          | 1.5755        | 0(0-Inf)                |
| SATIETY                                                     | 1                                       | 11.0904    | 67                                         | 39.3258       | 0.282(0.0391-2.0347)    |
| SCABIES                                                     | 1                                       | 7.6854     | 69                                         | 16.7683       | 0.4583(0.0635-3.308)    |
| SCABS                                                       | 0                                       | 0          | 18                                         | 6.1167        | 0(0-Inf)                |
| SCALD (CODE ALSO BURN BY SITE)                              | 0                                       | 0          | 4                                          | 1.2619        | 0(0-Inf)                |
| SCALES                                                      | 3                                       | 23.6177    | 45                                         | 15.4256       | 1.5311(0.4734-4.9513)   |
| SCAR, ANAL--ASCR                                            | 5                                       | 37.6361    | 65                                         | 15.7333       | 2.3921(0.9584-5.9706)   |
| SCAR, BURN, LATE EFFECT                                     | 0                                       | 0          | 14                                         | 3.5634        | 0(0-Inf)                |
| SCAR, CHELOID, SEE ALSO KELOID                              | 0                                       | 0          | 1                                          | 0.2354        | 0(0-Inf)                |
| SCAR, CHORIORETINAL                                         | 6                                       | 42.9178    | 85                                         | 23.9313       | 1.7934(0.7804-4.1212)   |
| SCAR, CONJUNCTIVA                                           | 0                                       | 0          | 4                                          | 3.0045        | 0(0-Inf)                |
| SCAR, CORNEAL                                               | 9                                       | 67.4166    | 148                                        | 46.0783       | 1.4631(0.7444-2.8756)   |
| SCAR, CORNEAL, HERPETIC                                     | 0                                       | 0          | 8                                          | 2.4866        | 0(0-Inf)                |
| SCAR, CORNEAL, TRAUMATIC                                    | 0                                       | 0          | 1                                          | 0.8881        | 0(0-Inf)                |
| SCAR, DISCIFORM                                             | 4                                       | 65.3095    | 105                                        | 106.2232      | 0.6148(0.2262-1.671)    |
| SCAR, EYELID                                                | 0                                       | 0          | 7                                          | 1.6868        | 0(0-Inf)                |
| SCAR, FOVEAL                                                | 0                                       | 0          | 3                                          | 1.1482        | 0(0-Inf)                |
| SCAR, HEAD OR NECK                                          | 11                                      | 78.4074    | 222                                        | 61.2164       | 1.2808(0.6976-2.3517)   |
| SCAR, HYPERTROPHIC, SEE ALSO KELOID                         | 4                                       | 28.8238    | 95                                         | 27.4093       | 1.0516(0.3855-2.8687)   |
| SCAR, INTESTINE / COLON                                     | 2                                       | 18.5763    | 21                                         | 9.3804        | 1.9803(0.4607-8.5123)   |
| SCAR, KIDNEY                                                | 1                                       | 7.3134     | 8                                          | 2.4839        | 2.9443(0.3634-23.8574)  |
| SCAR, LARYNX                                                | 0                                       | 0          | 11                                         | 3.6068        | 0(0-Inf)                |
| SCAR, LOWER EXTREMITY                                       | 0                                       | 0          | 51                                         | 13.9086       | 0(0-Inf)                |
| SCAR, LUNG                                                  | 3                                       | 23.4443    | 34                                         | 11.5396       | 2.0316(0.6201-6.6564)   |
| SCAR, MACULA                                                | 1                                       | 7.5555     | 32                                         | 10.1003       | 0.748(0.1017-5.4998)    |
| SCAR, MACULAR, SEE ALSO CORNEAL                             | 2                                       | 15.5219    | 38                                         | 12.681        | 1.224(0.2938-5.1002)    |
| SCAR, MUSCLE                                                | 0                                       | 0          | 3                                          | 0.7798        | 0(0-Inf)                |
| SCAR, MYOCARDIAL, INFERIOR, OLD                             | 1                                       | 7.3447     | 2                                          | 0.6447        | 11.393(1.0043-129.2391) |
| SCAR, MYOCARDIAL, POSTERIOR, OLD                            | 0                                       | 0          | 1                                          | 0.3526        | 0(0-Inf)                |
| SCAR, MYOCARDIAL, SEE ALSO INFARCTION, MYOCARDIAL           | 1                                       | 11.3584    | 0                                          | 0             | 7489759116.7855(0-Inf)  |
| SCAR, NERVE (ROOT), POST-OPERATIVE                          | 1                                       | 7.1306     | 6                                          | 1.3533        | 5.2691(0.6179-44.9297)  |
| SCAR, NOS, SKIN (SEE ALSO CICATRIX)                         | 10                                      | 72.3886    | 177                                        | 50.3012       | 1.4391(0.759-2.7286)    |
| SCAR, PAINFUL (CODE ALSO SCAR BY SITE IF STATED)            | 0                                       | 0          | 20                                         | 4.5791        | 0(0-Inf)                |

| Description                                                                    | No. of Positive Cases with Disease Code | Case Rate* | No. of Positive Controls with Disease Code | Control Rate* | Relative Risk (95%CI)   |
|--------------------------------------------------------------------------------|-----------------------------------------|------------|--------------------------------------------|---------------|-------------------------|
| SCAR, PILONIDAL                                                                | 0                                       | 0          | 1                                          | 0.4751        | 0(0-Inf)                |
| SCAR, RECTAL                                                                   | 0                                       | 0          | 9                                          | 5.1894        | 0(0-Inf)                |
| SCAR, RETINA                                                                   | 1                                       | 8.0717     | 41                                         | 14.6476       | 0.5511(0.0755-4.0198)   |
| SCAR, RETINAL, PERIPHERAL                                                      | 0                                       | 0          | 1                                          | 0.2354        | 0(0-Inf)                |
| SCAR, TENDON                                                                   | 0                                       | 0          | 3                                          | 0.8017        | 0(0-Inf)                |
| SCAR, TRUNK                                                                    | 8                                       | 56.6449    | 180                                        | 48.589        | 1.1658(0.5727-2.373)    |
| SCAR, TYMPANUM                                                                 | 2                                       | 16.5953    | 12                                         | 4.4993        | 3.6884(0.8148-16.697)   |
| SCAR, UPPER EXTREMITY                                                          | 4                                       | 27.8096    | 72                                         | 18.6105       | 1.4943(0.5437-4.1069)   |
| SCARLATINA                                                                     | 0                                       | 0          | 1                                          | 0.234         | 0(0-Inf)                |
| SCHISTOSOMIASIS, NOS                                                           | 0                                       | 0          | 1                                          | 0.2729        | 0(0-Inf)                |
| SCHIZOPHRENIA, ACUTE                                                           | 0                                       | 0          | 3                                          | 1.3473        | 0(0-Inf)                |
| SCHIZOPHRENIA, CHRONIC                                                         | 0                                       | 0          | 48                                         | 11.2275       | 0(0-Inf)                |
| SCHIZOPHRENIA, NEC                                                             | 1                                       | 7.2562     | 10                                         | 2.2983        | 3.1572(0.3975-25.0744)  |
| SCHIZOPHRENIA, NOS                                                             | 1                                       | 6.9417     | 70                                         | 17.2991       | 0.4013(0.0556-2.8959)   |
| SCHIZOPHRENIA, PARANOID TYPE                                                   | 1                                       | 7.4852     | 38                                         | 9.0409        | 0.8279(0.1132-6.0566)   |
| SCHIZOPHRENIA, RESIDUAL TYPE                                                   | 1                                       | 7.0771     | 13                                         | 3.1129        | 2.2735(0.2939-17.5879)  |
| SCHIZOPHRENIA, SCHIZO-AFFECTIVE TYPE                                           | 1                                       | 10.374     | 25                                         | 6.4253        | 1.6146(0.2173-11.9942)  |
| SCHWANNOMA (SEE ALSO NEURILEMMOMA) CODE ALSO NEOPLASM BENIGN BY SITE IF STATED | 0                                       | 0          | 13                                         | 3.2052        | 0(0-Inf)                |
| SCIATICA, NOS                                                                  | 32                                      | 229.6972   | 653                                        | 172.7529      | 1.3296(0.9312-1.8986)   |
| SCIATICA, POST-FUSION                                                          | 0                                       | 0          | 2                                          | 0.4854        | 0(0-Inf)                |
| SCLEREDEMA                                                                     | 0                                       | 0          | 2                                          | 0.432         | 0(0-Inf)                |
| SCLERITIS, ANTERIOR                                                            | 0                                       | 0          | 3                                          | 1.148         | 0(0-Inf)                |
| SCLERITIS, NEC                                                                 | 0                                       | 0          | 6                                          | 1.6914        | 0(0-Inf)                |
| SCLERITIS, NOS                                                                 | 1                                       | 7.3414     | 46                                         | 10.9597       | 0.6699(0.092-4.875)     |
| SCLERITIS, POSTERIOR                                                           | 0                                       | 0          | 2                                          | 0.5837        | 0(0-Inf)                |
| SCLERITIS, WITH CORNEAL INVOLVEMENT                                            | 1                                       | 6.878      | 0                                          | 0             | 12222849134.7551(0-Inf) |
| SCLERODACTYLIA                                                                 | 0                                       | 0          | 4                                          | 0.9158        | 0(0-Inf)                |
| SCLERODERMA, NOS                                                               | 1                                       | 7.0539     | 31                                         | 7.072         | 0.9974(0.1353-7.3508)   |
| SCLEROSIS, AMYOTROPHIC LATERAL--ALS                                            | 0                                       | 0          | 14                                         | 5.7708        | 0(0-Inf)                |
| SCLEROSIS, AORTA                                                               | 0                                       | 0          | 23                                         | 10.343        | 0(0-Inf)                |
| SCLEROSIS, AORTIC VALVE                                                        | 18                                      | 162.0375   | 435                                        | 182.8663      | 0.8861(0.5523-1.4216)   |
| SCLEROSIS, ARTERIOLAR, EXTREMITY                                               | 0                                       | 0          | 2                                          | 1.1972        | 0(0-Inf)                |
| SCLEROSIS, ARTERIOLAR, KIDNEY                                                  | 1                                       | 6.9574     | 3                                          | 0.7411        | 9.3876(0.9418-93.5748)  |
| SCLEROSIS, ARTERY, NEC                                                         | 0                                       | 0          | 3                                          | 1.9779        | 0(0-Inf)                |
| SCLEROSIS, ARTERY, NOS                                                         | 0                                       | 0          | 3                                          | 1.5758        | 0(0-Inf)                |
| SCLEROSIS, BONE, ACQUIRED                                                      | 1                                       | 6.9243     | 27                                         | 6.9713        | 0.9933(0.1342-7.3496)   |
| SCLEROSIS, BONE, NOS                                                           | 1                                       | 8.2345     | 10                                         | 3.692         | 2.2304(0.2817-17.6593)  |
| SCLEROSIS, CEREBRAL (DIFFUSE)                                                  | 0                                       | 0          | 2                                          | 0.5837        | 0(0-Inf)                |
| SCLEROSIS, CORONARY ARTERY                                                     | 0                                       | 0          | 27                                         | 6.7522        | 0(0-Inf)                |

| Description                                      | No. of Positive Cases with Disease Code | Case Rate* | No. of Positive Controls with Disease Code | Control Rate* | Relative Risk (95%CI)    |
|--------------------------------------------------|-----------------------------------------|------------|--------------------------------------------|---------------|--------------------------|
| SCLEROSIS, DISSEMINATED                          | 0                                       | 0          | 1                                          | 0.8274        | 0(0-Inf)                 |
| SCLEROSIS, KIDNEY                                | 0                                       | 0          | 8                                          | 2.2529        | 0(0-Inf)                 |
| SCLEROSIS, LUNG                                  | 1                                       | 11.6776    | 0                                          | 0             | 8833658645.2658(0-Inf)   |
| SCLEROSIS, MACULAR                               | 0                                       | 0          | 1                                          | 0.2354        | 0(0-Inf)                 |
| SCLEROSIS, MITRAL VALVE                          | 0                                       | 0          | 21                                         | 6.8362        | 0(0-Inf)                 |
| SCLEROSIS, MONCKEBERG'S, NOS                     | 0                                       | 0          | 2                                          | 0.5709        | 0(0-Inf)                 |
| SCLEROSIS, MULTIPLE                              | 2                                       | 21.8116    | 89                                         | 24.395        | 0.8941(0.2196-3.6396)    |
| SCLEROSIS, MULTIPLE, IN REMISSION                | 0                                       | 0          | 12                                         | 3.1743        | 0(0-Inf)                 |
| SCLEROSIS, NUCLEAR (EYE#)                        | 14                                      | 115.9423   | 340                                        | 123.4002      | 0.9396(0.5497-1.606)     |
| SCLEROSIS, PRIMARY, LATERAL                      | 0                                       | 0          | 1                                          | 0.3526        | 0(0-Inf)                 |
| SCLEROSIS, RETINA                                | 1                                       | 7.6984     | 5                                          | 1.6517        | 4.6608(0.5324-40.802)    |
| SCLEROSIS, SACROILIAC JOINT                      | 0                                       | 0          | 3                                          | 1.2106        | 0(0-Inf)                 |
| SCLEROSIS, SPINAL CORD                           | 0                                       | 0          | 4                                          | 0.9751        | 0(0-Inf)                 |
| SCLEROSIS, SUBCORTICAL (BONE)                    | 0                                       | 0          | 2                                          | 0.4681        | 0(0-Inf)                 |
| SCLEROSIS, SYSTEMIC, PROGRESSIVE                 | 1                                       | 9.1926     | 1                                          | 0.4524        | 20.3177(1.2285-336.0143) |
| SCLEROSIS, TEMPORAL ARTERY                       | 0                                       | 0          | 3                                          | 2.8215        | 0(0-Inf)                 |
| SCLEROSIS, TUBEROUS                              | 0                                       | 0          | 2                                          | 0.4681        | 0(0-Inf)                 |
| SCOLIOSIS, CERVICAL                              | 0                                       | 0          | 3                                          | 0.802         | 0(0-Inf)                 |
| SCOLIOSIS, CONGENITAL                            | 0                                       | 0          | 2                                          | 0.4682        | 0(0-Inf)                 |
| SCOLIOSIS, DORSAL                                | 0                                       | 0          | 8                                          | 1.8054        | 0(0-Inf)                 |
| SCOLIOSIS, DORSOLUMBAR                           | 0                                       | 0          | 1                                          | 0.234         | 0(0-Inf)                 |
| SCOLIOSIS, IDIOPATHIC                            | 0                                       | 0          | 5                                          | 1.1528        | 0(0-Inf)                 |
| SCOLIOSIS, LUMBAR                                | 5                                       | 37.5592    | 112                                        | 34.0868       | 1.1019(0.4484-2.7074)    |
| SCOLIOSIS, NOS                                   | 11                                      | 81.2072    | 234                                        | 67.6077       | 1.2012(0.6546-2.2039)    |
| SCOLIOSIS, PROGRESSIVE, CODE ALSO BY SITE STATED | 0                                       | 0          | 4                                          | 0.9157        | 0(0-Inf)                 |
| SCOLIOSIS, THORACIC                              | 0                                       | 0          | 57                                         | 13.1843       | 0(0-Inf)                 |
| SCOLIOSIS, THORACOLUMBAR                         | 2                                       | 14.1769    | 108                                        | 29.3631       | 0.4828(0.1189-1.96)      |
| SCOTOMA, CENTRAL                                 | 0                                       | 0          | 15                                         | 5.2033        | 0(0-Inf)                 |
| SCOTOMA, NOS                                     | 4                                       | 28.6347    | 82                                         | 22.7766       | 1.2572(0.4591-3.443)     |
| SCOTOMA, OF BLIND SPOT                           | 0                                       | 0          | 1                                          | 0.2354        | 0(0-Inf)                 |
| SCRATCH (SEE ALSO INJURY SUPERFICIAL BY SITE)    | 0                                       | 0          | 16                                         | 4.723         | 0(0-Inf)                 |
| SCREENING, CANCER                                | 17                                      | 127.8026   | 583                                        | 183.5856      | 0.6961(0.4294-1.1287)    |
| SCREENING, CARDIOVASCULAR                        | 1                                       | 6.9239     | 76                                         | 19.8527       | 0.3488(0.0484-2.5129)    |
| SCREENING, DIABETES                              | 0                                       | 0          | 2                                          | 0.4854        | 0(0-Inf)                 |
| SCREENING, DRUG / ALCOHOL                        | 0                                       | 0          | 2                                          | 0.432         | 0(0-Inf)                 |
| SCREENING, HEARING AND/OR VISION                 | 1                                       | 7.4087     | 7                                          | 2.1127        | 3.5067(0.4229-29.0759)   |
| SCREENING, NEC                                   | 24                                      | 183.5714   | 1133                                       | 367.6509      | 0.4993(0.333-0.7486)     |
| SCREENING, VENEREAL DISEASE                      | 0                                       | 0          | 15                                         | 4.0724        | 0(0-Inf)                 |
| SCROFULA                                         | 0                                       | 0          | 1                                          | 0.234         | 0(0-Inf)                 |
| SCROTAL TONGUE                                   | 0                                       | 0          | 1                                          | 0.234         | 0(0-Inf)                 |

| Description                                                            | No. of Positive Cases with Disease Code | Case Rate* | No. of Positive Controls with Disease Code | Control Rate* | Relative Risk (95%CI)    |
|------------------------------------------------------------------------|-----------------------------------------|------------|--------------------------------------------|---------------|--------------------------|
| SEBORRHEA, CAPITIS (SCALP)                                             | 2                                       | 16.0902    | 77                                         | 27.6129       | 0.5827(0.1428-2.3773)    |
| SEBORRHEA, NOS                                                         | 16                                      | 116.4702   | 406                                        | 119.5848      | 0.974(0.5902-1.6073)     |
| SEBORRHIASIS/SEBOPSORIASIS                                             | 0                                       | 0          | 50                                         | 18.104        | 0(0-Inf)                 |
| SECOND OPINION NEC/NOS                                                 | 0                                       | 0          | 3                                          | 0.9165        | 0(0-Inf)                 |
| SECONDARY CLOSURE OF (POSTOP) WOUND                                    | 1                                       | 9.1079     | 4                                          | 1.7373        | 5.2427(0.5719-48.0603)   |
| SEDENTARY (LIFE STYLE)                                                 | 0                                       | 0          | 47                                         | 16.4907       | 0(0-Inf)                 |
| SEGMENTATION BONE (CONGENITAL)                                         | 0                                       | 0          | 1                                          | 0.4048        | 0(0-Inf)                 |
| SEIZURE, ABSENCE                                                       | 0                                       | 0          | 4                                          | 1.1698        | 0(0-Inf)                 |
| SEIZURE, AKINETIC                                                      | 0                                       | 0          | 1                                          | 0.2354        | 0(0-Inf)                 |
| SEIZURE, ALCOHOL WITHDRAWAL                                            | 0                                       | 0          | 6                                          | 1.5147        | 0(0-Inf)                 |
| SEIZURE, EPILEPTIC                                                     | 0                                       | 0          | 3                                          | 0.7175        | 0(0-Inf)                 |
| SEIZURE, FEBRILE                                                       | 0                                       | 0          | 1                                          | 2.4855        | 0(0-Inf)                 |
| SEIZURE, FOCAL                                                         | 0                                       | 0          | 27                                         | 7.4351        | 0(0-Inf)                 |
| SEIZURE, FOCAL MOTOR                                                   | 0                                       | 0          | 8                                          | 2.7456        | 0(0-Inf)                 |
| SEIZURE, GRAND MAL                                                     | 0                                       | 0          | 26                                         | 6.5664        | 0(0-Inf)                 |
| SEIZURE, HYSTERICAL                                                    | 0                                       | 0          | 1                                          | 0.8274        | 0(0-Inf)                 |
| SEIZURE, NOS, SEE ALSO EPILEPSY OR CONVULSION--SZ                      | 12                                      | 105.5718   | 275                                        | 112.8307      | 0.9357(0.5241-1.6705)    |
| SEIZURE, PSYCHOMOTOR                                                   | 0                                       | 0          | 4                                          | 1.142         | 0(0-Inf)                 |
| SEIZURE, SENSORY                                                       | 0                                       | 0          | 1                                          | 0.2354        | 0(0-Inf)                 |
| SEIZURE, SOMATOSENSORY                                                 | 0                                       | 0          | 2                                          | 0.5475        | 0(0-Inf)                 |
| SEIZURE, TEMPORAL LOBE                                                 | 2                                       | 14.0984    | 42                                         | 11.3489       | 1.2423(0.2991-5.1589)    |
| SEIZURE, TONIC(-CLONIC)                                                | 1                                       | 7.5258     | 38                                         | 12.0398       | 0.6251(0.0855-4.5699)    |
| SEIZURE, VISUALLY-INDUCED                                              | 0                                       | 0          | 3                                          | 0.8019        | 0(0-Inf)                 |
| SELF - INJURIOUS BEHAVIOR                                              | 0                                       | 0          | 4                                          | 1.968         | 0(0-Inf)                 |
| SELF-CATHETERIZATION                                                   | 0                                       | 0          | 35                                         | 25.4491       | 0(0-Inf)                 |
| SEMINOMA, NOS (TESTIS #)                                               | 0                                       | 0          | 5                                          | 1.6015        | 0(0-Inf)                 |
| SEMINOMA, SITE OTHER THAN TESTIS, CODE ALSO NEOPLASM MALIGNANT BY SITE | 0                                       | 0          | 3                                          | 1.4255        | 0(0-Inf)                 |
| SENESCENCE ( BRAIN #)                                                  | 1                                       | 16.3946    | 1                                          | 1.191         | 13.7656(0.8442-224.4742) |
| SENILE SKIN                                                            | 6                                       | 83.2621    | 78                                         | 65.2817       | 1.2754(0.5547-2.9328)    |
| SENILITY                                                               | 0                                       | 0          | 8                                          | 9.6651        | 0(0-Inf)                 |
| SENSITIVITY, BEE STING                                                 | 1                                       | 8.4243     | 19                                         | 4.6471        | 1.8128(0.2406-13.6574)   |
| SENSITIVITY, CAROTID SINUS                                             | 0                                       | 0          | 2                                          | 1.0782        | 0(0-Inf)                 |
| SENSITIVITY, COLD                                                      | 0                                       | 0          | 10                                         | 2.6262        | 0(0-Inf)                 |
| SENSITIVITY, CONTACT, SEE ALSO DERMATITIS, CONTACT                     | 0                                       | 0          | 17                                         | 4.1115        | 0(0-Inf)                 |
| SENSITIVITY, LIGHT                                                     | 0                                       | 0          | 15                                         | 3.8055        | 0(0-Inf)                 |
| SENSITIVITY, SULFONAMIDE                                               | 0                                       | 0          | 1                                          | 0.234         | 0(0-Inf)                 |
| SENSITIVITY, TEETH                                                     | 0                                       | 0          | 53                                         | 19.671        | 0(0-Inf)                 |
| SENSITIZATION (AUTOERYTHROCYTE)                                        | 0                                       | 0          | 2                                          | 0.5069        | 0(0-Inf)                 |
| SEPARATION, ACROMIOCLAVICULAR                                          | 0                                       | 0          | 32                                         | 8.8396        | 0(0-Inf)                 |

| Description                                                      | No. of Positive Cases with Disease Code | Case Rate* | No. of Positive Controls with Disease Code | Control Rate* | Relative Risk (95%CI)  |
|------------------------------------------------------------------|-----------------------------------------|------------|--------------------------------------------|---------------|------------------------|
| SEPARATION, ACROMIOCLAVICULAR (OLD) (CHRONIC)                    | 1                                       | 7.5971     | 7                                          | 2.3117        | 3.2864(0.3985-27.1035) |
| SEPARATION, CHONDRAL, CODE ALSO DISLOCATION, OLD/CHRONIC BY SITE | 0                                       | 0          | 21                                         | 5.3727        | 0(0-Inf)               |
| SEPARATION, VITREOUS                                             | 1                                       | 6.945      | 81                                         | 20.2729       | 0.3426(0.0476-2.4669)  |
| SEPSIS, DENTAL                                                   | 0                                       | 0          | 2                                          | 1.266         | 0(0-Inf)               |
| SEPSIS, JOINT, CODE ALSO INFECTION BY SITE                       | 7                                       | 63.82      | 61                                         | 26.2933       | 2.4272(1.1054-5.3296)  |
| SEPSIS, NOS, SEE ALSO SEPTICEMIA                                 | 17                                      | 204.7756   | 195                                        | 126.2884      | 1.6215(0.9859-2.6668)  |
| SEPSIS, RENAL                                                    | 0                                       | 0          | 1                                          | 0.4048        | 0(0-Inf)               |
| SEPSIS, URINARY (CODE ALSO UTI TYPE SPECIFIED)                   | 1                                       | 15.4963    | 9                                          | 8.258         | 1.8765(0.236-14.9188)  |
| SEPTICEMIA, BACTERIAL, NOS                                       | 0                                       | 0          | 1                                          | 0.3527        | 0(0-Inf)               |
| SEPTICEMIA, CANDIDA                                              | 0                                       | 0          | 5                                          | 2.0025        | 0(0-Inf)               |
| SEPTICEMIA, CITROBACTER (FREUNDII)                               | 0                                       | 0          | 2                                          | 5.0783        | 0(0-Inf)               |
| SEPTICEMIA, CLOSTRIDIUM                                          | 0                                       | 0          | 1                                          | 0.4048        | 0(0-Inf)               |
| SEPTICEMIA, ESCHERICHIA COLI                                     | 3                                       | 24.4806    | 16                                         | 5.8064        | 4.2161(1.2134-14.6493) |
| SEPTICEMIA, FUNGAL                                               | 0                                       | 0          | 2                                          | 3.0809        | 0(0-Inf)               |
| SEPTICEMIA, GRAM-NEGATIVE BACILLI, NEC                           | 0                                       | 0          | 2                                          | 0.4681        | 0(0-Inf)               |
| SEPTICEMIA, GRAM-NEGATIVE COCCI, NEC                             | 0                                       | 0          | 1                                          | 2.4926        | 0(0-Inf)               |
| SEPTICEMIA, GRAM-NEGATIVE, NOS                                   | 0                                       | 0          | 18                                         | 10.8345       | 0(0-Inf)               |
| SEPTICEMIA, HAEMOPHILUS                                          | 0                                       | 0          | 1                                          | 0.234         | 0(0-Inf)               |
| SEPTICEMIA, KLEBSIELLA (PNEUMONIAE)                              | 0                                       | 0          | 14                                         | 8.4669        | 0(0-Inf)               |
| SEPTICEMIA, NEC                                                  | 0                                       | 0          | 3                                          | 0.9165        | 0(0-Inf)               |
| SEPTICEMIA, NEISSERIA, EXCEPT GONOCOCCAL                         | 0                                       | 0          | 2                                          | 0.5069        | 0(0-Inf)               |
| SEPTICEMIA, NOS                                                  | 4                                       | 43.0521    | 30                                         | 16.5939       | 2.5945(0.9086-7.4086)  |
| SEPTICEMIA, PNEUMOCOCCAL                                         | 0                                       | 0          | 3                                          | 2.8214        | 0(0-Inf)               |
| SEPTICEMIA, PSEUDOMONAS AERUGINOSA                               | 1                                       | 10.0388    | 4                                          | 2.0067        | 5.0025(0.5477-45.6884) |
| SEPTICEMIA, SALMONELLA                                           | 0                                       | 0          | 1                                          | 0.8879        | 0(0-Inf)               |
| SEPTICEMIA, SERRATIA MARCESCENS                                  | 0                                       | 0          | 1                                          | 0.2354        | 0(0-Inf)               |
| SEPTICEMIA, STAPHYLOCOCCAL                                       | 2                                       | 16.7194    | 28                                         | 10.5879       | 1.5791(0.3738-6.6703)  |
| SEPTICEMIA, STREPTOCOCCAL                                        | 0                                       | 0          | 14                                         | 12.3258       | 0(0-Inf)               |
| SEPTUM, HYMEN                                                    | 0                                       | 0          | 1                                          | 0.234         | 0(0-Inf)               |
| SEPTUM, UTERUS                                                   | 0                                       | 0          | 5                                          | 1.1117        | 0(0-Inf)               |
| SEPTUM, VAGINA                                                   | 0                                       | 0          | 1                                          | 0.398         | 0(0-Inf)               |
| SEQUESTRATION LUNG/BRONCHOGENIC                                  | 0                                       | 0          | 1                                          | 0.398         | 0(0-Inf)               |
| SEQUESTRUM OF BONE                                               | 3                                       | 20.91      | 19                                         | 4.9553        | 4.2197(1.2336-14.434)  |
| SEROMA OF OPERATIVE WOUND                                        | 3                                       | 22.8599    | 89                                         | 28.4427       | 0.8037(0.2536-2.547)   |
| SEROSITIS                                                        | 0                                       | 0          | 29                                         | 7.2767        | 0(0-Inf)               |
| SERUM, SICKNESS                                                  | 0                                       | 0          | 2                                          | 0.432         | 0(0-Inf)               |
| SESAMOIDITIS                                                     | 0                                       | 0          | 38                                         | 8.979         | 0(0-Inf)               |
| SHAGGY AORTA                                                     | 0                                       | 0          | 1                                          | 0.2354        | 0(0-Inf)               |
| SHALLOW ANTERIOR CHAMBER                                         | 0                                       | 0          | 1                                          | 0.8528        | 0(0-Inf)               |

| Description                    | No. of Positive Cases with Disease Code | Case Rate* | No. of Positive Controls with Disease Code | Control Rate* | Relative Risk (95%CI)    |
|--------------------------------|-----------------------------------------|------------|--------------------------------------------|---------------|--------------------------|
| SHEATHING (VENOUS)(RETINAL)    | 0                                       | 0          | 5                                          | 1.1528        | 0(0-Inf)                 |
| SHINGLES                       | 12                                      | 105.3766   | 344                                        | 140.604       | 0.7495(0.4209-1.3344)    |
| SHOCK, CARDIOGENIC             | 1                                       | 9.472      | 46                                         | 21.2413       | 0.4459(0.0613-3.2422)    |
| SHOCK, ELECTRIC                | 0                                       | 0          | 6                                          | 1.4822        | 0(0-Inf)                 |
| SHOCK, HEMORRHAGIC, NOS        | 1                                       | 8.5118     | 7                                          | 2.7755        | 3.0667(0.3722-25.2716)   |
| SHOCK, HYPOVOLEMIC, NOS        | 0                                       | 0          | 6                                          | 7.8483        | 0(0-Inf)                 |
| SHOCK, HYPOVOLEMIC, TRAUMATIC  | 0                                       | 0          | 1                                          | 2.4855        | 0(0-Inf)                 |
| SHOCK, LIVER                   | 0                                       | 0          | 10                                         | 4.6859        | 0(0-Inf)                 |
| SHOCK, NOS                     | 1                                       | 18.1788    | 18                                         | 20.6276       | 0.8813(0.1173-6.6228)    |
| SHOCK, POSTOPERATIVE           | 0                                       | 0          | 1                                          | 0.8879        | 0(0-Inf)                 |
| SHOCK, SEPTIC                  | 4                                       | 38.5071    | 34                                         | 16.0388       | 2.4009(0.8471-6.805)     |
| SHORT, ACHILLES TENDON         | 0                                       | 0          | 1                                          | 0.234         | 0(0-Inf)                 |
| SHORT, ESOPHAGUS, ACQUIRED     | 0                                       | 0          | 14                                         | 4.2402        | 0(0-Inf)                 |
| SHORT, ESOPHAGUS, NOS          | 2                                       | 16.7241    | 36                                         | 13.6284       | 1.2272(0.2939-5.1233)    |
| SHORT, HIP, NOS                | 0                                       | 0          | 1                                          | 0.8542        | 0(0-Inf)                 |
| SHORT, LOWER EXTREMITY, NOS    | 0                                       | 0          | 4                                          | 0.9671        | 0(0-Inf)                 |
| SHORT, METATARSUS, NOS         | 0                                       | 0          | 3                                          | 0.9164        | 0(0-Inf)                 |
| SHORT, TENDON, NOS             | 0                                       | 0          | 2                                          | 0.5069        | 0(0-Inf)                 |
| SHORT, UPPER EXTREMITY, NOS    | 0                                       | 0          | 3                                          | 0.8018        | 0(0-Inf)                 |
| SHORT, URETHRA                 | 3                                       | 20.9872    | 38                                         | 11.0369       | 1.9015(0.5844-6.1868)    |
| SHORT, VAGINA                  | 0                                       | 0          | 3                                          | 0.7063        | 0(0-Inf)                 |
| SHORTNESS OF BREATH            | 49                                      | 548.8801   | 1266                                       | 745.6256      | 0.7361(0.553-0.9798)     |
| SHRINKAGE (VITREAL)            | 1                                       | 7.1161     | 1                                          | 0.219         | 32.5003(1.8929-558.0053) |
| SHUNT, INTRA-CARDIAC           | 0                                       | 0          | 22                                         | 10.4897       | 0(0-Inf)                 |
| SHUNT, LEFT TO RIGHT           | 0                                       | 0          | 8                                          | 3.7815        | 0(0-Inf)                 |
| SIALADENITIS, NOS              | 4                                       | 27.8751    | 78                                         | 20.1851       | 1.381(0.5035-3.7875)     |
| SIALADENITIS, PAROTID          | 0                                       | 0          | 24                                         | 5.8707        | 0(0-Inf)                 |
| SIALADENITIS, SALIVARY GLAND   | 0                                       | 0          | 5                                          | 1.4454        | 0(0-Inf)                 |
| SIALADENITIS, SUBMANDIBULAR    | 1                                       | 6.9388     | 48                                         | 12.0645       | 0.5751(0.0791-4.182)     |
| SIALADENITIS, SUBMAXILLARY     | 0                                       | 0          | 9                                          | 2.2479        | 0(0-Inf)                 |
| SIALOMETAPLASIA (NECROTIZING)  | 0                                       | 0          | 1                                          | 0.398         | 0(0-Inf)                 |
| SIALORRHEA, NOS                | 1                                       | 14.4114    | 3                                          | 2.4592        | 5.8602(0.6003-57.2037)   |
| SIALOSIS (NUTRITIONAL)         | 0                                       | 0          | 3                                          | 0.8018        | 0(0-Inf)                 |
| SICKNESS, AIR                  | 0                                       | 0          | 3                                          | 1.5755        | 0(0-Inf)                 |
| SICKNESS, MOTION               | 0                                       | 0          | 31                                         | 6.9591        | 0(0-Inf)                 |
| SIGMOIDITIS-SEE ALSO ENTERITIS | 1                                       | 8.1019     | 29                                         | 10.4157       | 0.7779(0.1055-5.7372)    |
| SIGN, BABINSKI                 | 0                                       | 0          | 9                                          | 6.2364        | 0(0-Inf)                 |
| SIGN, CORTICOSPINAL            | 0                                       | 0          | 5                                          | 2.0031        | 0(0-Inf)                 |
| SIGN, HOMAN'S                  | 0                                       | 0          | 1                                          | 0.234         | 0(0-Inf)                 |
| SIGN, LHERMITTE'S              | 0                                       | 0          | 1                                          | 0.2354        | 0(0-Inf)                 |

| Description                                       | No. of Positive Cases with Disease Code | Case Rate* | No. of Positive Controls with Disease Code | Control Rate* | Relative Risk (95%CI)  |
|---------------------------------------------------|-----------------------------------------|------------|--------------------------------------------|---------------|------------------------|
| SIGN, PYRAMIDAL                                   | 0                                       | 0          | 6                                          | 1.8811        | 0(0-Inf)               |
| SIGN, TINEL                                       | 0                                       | 0          | 1                                          | 2.493         | 0(0-Inf)               |
| SIGN, WHISNANT'S                                  | 0                                       | 0          | 1                                          | 0.8879        | 0(0-Inf)               |
| SILICONOMA                                        | 0                                       | 0          | 1                                          | 0.2354        | 0(0-Inf)               |
| SILICOSIS                                         | 0                                       | 0          | 1                                          | 0.3526        | 0(0-Inf)               |
| SINUS, RHYTHM                                     | 12                                      | 126.1818   | 286                                        | 153.5563      | 0.8217(0.4606-1.4659)  |
| SINUS, BREAST                                     | 0                                       | 0          | 1                                          | 0.4049        | 0(0-Inf)               |
| SINUS, PILONIDAL                                  | 1                                       | 10.2133    | 6                                          | 1.8271        | 5.5898(0.6618-47.2127) |
| SINUS, ROKITANSKY                                 | 0                                       | 0          | 1                                          | 0.3526        | 0(0-Inf)               |
| SINUS, SKIN, SEE ALSO FISTULA, SKIN               | 0                                       | 0          | 1                                          | 0.2729        | 0(0-Inf)               |
| SINUSITIS, ACUTE                                  | 20                                      | 146.8788   | 750                                        | 176.7729      | 0.8309(0.5324-1.2968)  |
| SINUSITIS, ALLERGIC                               | 1                                       | 7.0984     | 52                                         | 14.4206       | 0.4922(0.0678-3.5715)  |
| SINUSITIS, ANTRAL                                 | 1                                       | 9.8049     | 16                                         | 4.163         | 2.3553(0.3094-17.9291) |
| SINUSITIS, ANTRAL, ACUTE                          | 0                                       | 0          | 2                                          | 0.4681        | 0(0-Inf)               |
| SINUSITIS, ETHMOIDAL                              | 4                                       | 28.6451    | 120                                        | 28.8446       | 0.9931(0.3658-2.6964)  |
| SINUSITIS, ETHMOIDAL, ACUTE                       | 0                                       | 0          | 11                                         | 2.8516        | 0(0-Inf)               |
| SINUSITIS, FRONTAL                                | 5                                       | 45.1696    | 89                                         | 22.3402       | 2.0219(0.8181-4.9973)  |
| SINUSITIS, FRONTAL, ACUTE                         | 1                                       | 7.4988     | 10                                         | 2.4799        | 3.0239(0.382-23.9395)  |
| SINUSITIS, FUNGAL (ANY SINUS)                     | 0                                       | 0          | 20                                         | 7.132         | 0(0-Inf)               |
| SINUSITIS, MAXILLARY                              | 18                                      | 148.388    | 615                                        | 149.2687      | 0.9941(0.6214-1.5903)  |
| SINUSITIS, MAXILLARY, ACUTE                       | 2                                       | 15.6398    | 115                                        | 27.2229       | 0.5745(0.1417-2.3299)  |
| SINUSITIS, NOS                                    | 100                                     | 767.3197   | 3209                                       | 840.1958      | 0.9133(0.7481-1.1149)  |
| SITUS, INVERSUS                                   | 0                                       | 0          | 2                                          | 0.432         | 0(0-Inf)               |
| SIX LUMBAR VERTEBRA                               | 1                                       | 7.7314     | 10                                         | 2.4004        | 3.2209(0.4062-25.5384) |
| SKEWFOOT                                          | 0                                       | 0          | 2                                          | 0.4853        | 0(0-Inf)               |
| SKIER'S THUMB                                     | 0                                       | 0          | 3                                          | 1.058         | 0(0-Inf)               |
| SLAC (SCAPHOLUNATE ADVANCED COLLAPSE) (ARTHRITIS) | 0                                       | 0          | 29                                         | 12.9549       | 0(0-Inf)               |
| SLEEP, DISORDERED BREATHING                       | 6                                       | 50.7579    | 130                                        | 50.5548       | 1.004(0.4419-2.281)    |
| SLEEP, TALKING                                    | 0                                       | 0          | 1                                          | 0.3526        | 0(0-Inf)               |
| SLEEP, WALKING                                    | 0                                       | 0          | 3                                          | 1.1479        | 0(0-Inf)               |
| SLEEPINESS, CAUSE SPECIFIED                       | 1                                       | 10.3551    | 3                                          | 1.5744        | 6.5771(0.6689-64.6676) |
| SLEEPINESS, NOS                                   | 8                                       | 68.281     | 180                                        | 70.6861       | 0.966(0.4749-1.965)    |
| SLIPPED, DISC, NOS                                | 0                                       | 0          | 2                                          | 0.5475        | 0(0-Inf)               |
| SLIPPED, EPIPHYSIS, NONTRAUMATIC, UPPER FEMORAL   | 0                                       | 0          | 3                                          | 0.8711        | 0(0-Inf)               |
| SLIPPED, EPIPHYSIS, NOS                           | 0                                       | 0          | 1                                          | 0.2729        | 0(0-Inf)               |
| SLIPPED, LUMBAR DISC                              | 0                                       | 0          | 2                                          | 0.4708        | 0(0-Inf)               |
| SLIPPED, PATELLA                                  | 0                                       | 0          | 1                                          | 0.234         | 0(0-Inf)               |
| SLIPPED, RIB                                      | 0                                       | 0          | 1                                          | 0.8277        | 0(0-Inf)               |
| SLIPPED, TENDON                                   | 0                                       | 0          | 11                                         | 2.9764        | 0(0-Inf)               |
| SLIPPED, ULNAR NERVE                              | 0                                       | 0          | 2                                          | 0.4853        | 0(0-Inf)               |



| Description                                             | No. of Positive Cases with Disease Code | Case Rate* | No. of Positive Controls with Disease Code | Control Rate* | Relative Risk (95%CI)    |
|---------------------------------------------------------|-----------------------------------------|------------|--------------------------------------------|---------------|--------------------------|
| SLOUGHING, BLADDER                                      | 0                                       | 0          | 1                                          | 0.8877        | 0(0-Inf)                 |
| SLOUGHING, NOS                                          | 0                                       | 0          | 6                                          | 2.369         | 0(0-Inf)                 |
| SLOUGHING, RECTUM                                       | 0                                       | 0          | 1                                          | 0.8877        | 0(0-Inf)                 |
| SLOUGHING, SKIN GRAFT                                   | 0                                       | 0          | 1                                          | 0.4751        | 0(0-Inf)                 |
| SLOW, PULSE                                             | 0                                       | 0          | 12                                         | 11.3684       | 0(0-Inf)                 |
| SLOW, URINARY STREAM                                    | 1                                       | 10.4415    | 71                                         | 38.2544       | 0.2729(0.0379-1.9669)    |
| SLOW, VENTRICULAR RESPONSE                              | 3                                       | 58.5821    | 49                                         | 60.7977       | 0.9636(0.2998-3.097)     |
| SLUDGE GALLBLADDER-SEE ALSO CALCULUS/DEPOSIT            | 1                                       | 8.5647     | 27                                         | 10.6905       | 0.8012(0.1084-5.9225)    |
| SMALL, BLADDER                                          | 3                                       | 24.7436    | 44                                         | 16.2958       | 1.5184(0.4691-4.9147)    |
| SMALL, KIDNEY                                           | 0                                       | 0          | 14                                         | 3.4364        | 0(0-Inf)                 |
| SMOKER, CESSATION PROGRAM                               | 6                                       | 47.8134    | 284                                        | 69.2145       | 0.6908(0.3073-1.5528)    |
| SMOKER, CHANGES (PHARYNX)                               | 0                                       | 0          | 17                                         | 4.7154        | 0(0-Inf)                 |
| SMOKER, LARYNX (CHANGES)                                | 2                                       | 14.2387    | 34                                         | 8.1459        | 1.748(0.4172-7.3231)     |
| SMOKER, SECONDARY                                       | 0                                       | 0          | 2                                          | 0.7052        | 0(0-Inf)                 |
| SMOKER, SMOKING HABIT--QUITTING (PREV. MED. DX.)        | 0                                       | 0          | 23                                         | 6.125         | 0(0-Inf)                 |
| SNAPPING, FINGER                                        | 0                                       | 0          | 4                                          | 1.0712        | 0(0-Inf)                 |
| SNAPPING, HIP                                           | 1                                       | 7.2259     | 2                                          | 0.4642        | 15.5659(1.3431-180.4049) |
| SNAPPING, ILIOTIBIAL BAND                               | 0                                       | 0          | 3                                          | 0.9774        | 0(0-Inf)                 |
| SNAPPING, JAW                                           | 0                                       | 0          | 6                                          | 1.4006        | 0(0-Inf)                 |
| SNAPPING, JOINT, NEC                                    | 1                                       | 9.1129     | 13                                         | 3.2543        | 2.8003(0.3618-21.671)    |
| SNAPPING, KNEE                                          | 0                                       | 0          | 7                                          | 1.8254        | 0(0-Inf)                 |
| SNAPPING, TENDON, HIP                                   | 1                                       | 6.9483     | 2                                          | 0.496         | 14.0085(1.2094-162.2636) |
| SNAPPING, THUMB                                         | 0                                       | 0          | 4                                          | 0.9362        | 0(0-Inf)                 |
| SNEEZING                                                | 2                                       | 15.7114    | 15                                         | 5.067         | 3.1007(0.7008-13.7183)   |
| SNORING                                                 | 15                                      | 111.8141   | 659                                        | 207.671       | 0.5384(0.3225-0.8989)    |
| SOCIAL WORKER VISIT                                     | 1                                       | 13.2618    | 10                                         | 7.7257        | 1.7166(0.218-13.5172)    |
| SOLITARY, KIDNEY (ACQUIRED)                             | 4                                       | 36.143     | 61                                         | 26.1397       | 1.3827(0.5009-3.8167)    |
| SOLITARY, KIDNEY (CONGENITAL)                           | 1                                       | 8.5539     | 15                                         | 5.9458        | 1.4387(0.1886-10.9744)   |
| SOMATIZATION NOS-SEE ALSO DISORDER/DYSFUNCTION/REACTION | 8                                       | 56.2113    | 261                                        | 67.1417       | 0.8372(0.4135-1.6951)    |
| SOMNOLENCE                                              | 8                                       | 79.021     | 167                                        | 81.9731       | 0.964(0.4734-1.9632)     |
| SORE, DENTURE                                           | 7                                       | 70.8046    | 108                                        | 54.9542       | 1.2884(0.5983-2.7748)    |
| SORE, MOUTH                                             | 8                                       | 62.6654    | 94                                         | 31.2191       | 2.0073(0.9711-4.1491)    |
| SORE, PRESSURE, SEE ALSO ULCER, DECUBITUS               | 4                                       | 58.4287    | 89                                         | 76.5678       | 0.7631(0.2797-2.0816)    |
| SORE, THROAT                                            | 20                                      | 144.9602   | 720                                        | 207.6235      | 0.6982(0.4473-1.0898)    |
| SORE, THROAT, STREPTOCOCCAL                             | 0                                       | 0          | 10                                         | 3.931         | 0(0-Inf)                 |
| SORE, THROAT, VIRAL                                     | 1                                       | 9.889      | 18                                         | 4.8018        | 2.0594(0.2726-15.5591)   |
| SPASM, ACCOMMODATION                                    | 0                                       | 0          | 1                                          | 0.3526        | 0(0-Inf)                 |
| SPASM, ANAL                                             | 0                                       | 0          | 9                                          | 6.2835        | 0(0-Inf)                 |
| SPASM, ARTERIAL                                         | 0                                       | 0          | 4                                          | 0.9751        | 0(0-Inf)                 |

| Description                              | No. of Positive Cases with Disease Code | Case Rate* | No. of Positive Controls with Disease Code | Control Rate* | Relative Risk (95%CI)    |
|------------------------------------------|-----------------------------------------|------------|--------------------------------------------|---------------|--------------------------|
| SPASM, BLADDER                           | 4                                       | 34.7125    | 96                                         | 38.642        | 0.8983(0.3296-2.4487)    |
| SPASM, CARPOPEDAL                        | 0                                       | 0          | 2                                          | 0.7896        | 0(0-Inf)                 |
| SPASM, CEREBROVASCULAR                   | 0                                       | 0          | 3                                          | 1.3872        | 0(0-Inf)                 |
| SPASM, CORONARY, SEE ALSO ISCHEMIA       | 1                                       | 6.956      | 30                                         | 7.7104        | 0.9022(0.1224-6.6521)    |
| SPASM, CRICOPHARYNGEAL                   | 0                                       | 0          | 6                                          | 2.4445        | 0(0-Inf)                 |
| SPASM, ESOPHAGEAL                        | 16                                      | 113.9262   | 195                                        | 51.8476       | 2.1973(1.316-3.6689)     |
| SPASM, ESOPHAGEAL, DIFFUSE               | 1                                       | 7.1662     | 7                                          | 1.6077        | 4.4575(0.5364-37.0448)   |
| SPASM, EXTREMITY, LOWER                  | 2                                       | 15.3518    | 65                                         | 21.2337       | 0.723(0.1765-2.9619)     |
| SPASM, EXTREMITY, UPPER                  | 0                                       | 0          | 37                                         | 9.6311        | 0(0-Inf)                 |
| SPASM, FACIAL                            | 0                                       | 0          | 9                                          | 2.1131        | 0(0-Inf)                 |
| SPASM, HABIT                             | 0                                       | 0          | 1                                          | 0.234         | 0(0-Inf)                 |
| SPASM, HEMIFACIAL                        | 1                                       | 7.4301     | 33                                         | 10.0366       | 0.7403(0.1008-5.4388)    |
| SPASM, INTESTINE                         | 2                                       | 15.5841    | 46                                         | 10.3827       | 1.501(0.3624-6.217)      |
| SPASM, LARYNX                            | 1                                       | 6.949      | 22                                         | 5.4891        | 1.266(0.1694-9.4581)     |
| SPASM, MUSCLE, NOS                       | 33                                      | 242.9781   | 888                                        | 217.2772      | 1.1183(0.7891-1.5847)    |
| SPASM, OCULAR (EYE)                      | 0                                       | 0          | 2                                          | 0.432         | 0(0-Inf)                 |
| SPASM, PHARYNGEAL                        | 0                                       | 0          | 6                                          | 1.5024        | 0(0-Inf)                 |
| SPASM, SPHINCTER OF ODDI                 | 0                                       | 0          | 1                                          | 0.398         | 0(0-Inf)                 |
| SPASM, URETER                            | 0                                       | 0          | 1                                          | 0.2354        | 0(0-Inf)                 |
| SPASM, VAGINA (PSYCHOGENIC)              | 0                                       | 0          | 1                                          | 0.234         | 0(0-Inf)                 |
| SPEECH, DEAF                             | 1                                       | 11.7699    | 0                                          | 0             | 8856554313.2307(0-Inf)   |
| SPEECH, DEFECT                           | 0                                       | 0          | 6                                          | 3.0219        | 0(0-Inf)                 |
| SPEECH, IMPEDIMENT, NOS                  | 0                                       | 0          | 2                                          | 0.6309        | 0(0-Inf)                 |
| SPEECH, NASAL                            | 1                                       | 7.7773     | 0                                          | 0             | 17342027729.2669(0-Inf)  |
| SPEECH, PATHOLOGY, NOT OTHERWISE CODABLE | 1                                       | 7.4071     | 7                                          | 2.1129        | 3.5056(0.4228-29.0663)   |
| SPEECH, POST-LARYNGECTOMY                | 0                                       | 0          | 6                                          | 3.971         | 0(0-Inf)                 |
| SPEECH, PSEUDOBULBAR                     | 0                                       | 0          | 1                                          | 0.3526        | 0(0-Inf)                 |
| SPEECH, SLURRED                          | 6                                       | 81.5287    | 56                                         | 43.8059       | 1.8611(0.7992-4.3343)    |
| SPEECH, THERAPY                          | 0                                       | 0          | 4                                          | 2.9169        | 0(0-Inf)                 |
| SPEECH, VARIATIONS, DUE TO FAULTY HABIT  | 0                                       | 0          | 1                                          | 0.4049        | 0(0-Inf)                 |
| SPEECH, VOICE RECORDING                  | 0                                       | 0          | 1                                          | 0.2354        | 0(0-Inf)                 |
| SPELL, VASOVAGAL                         | 1                                       | 9.4813     | 19                                         | 8.7854        | 1.0792(0.1436-8.1131)    |
| SPELLS (INDETERMINATE)                   | 43                                      | 403.4916   | 1301                                       | 583.9137      | 0.691(0.5096-0.9369)     |
| SPERMATOCELE                             | 17                                      | 239.9316   | 245                                        | 135.7467      | 1.7675(1.0794-2.8941)    |
| SPHENOIDITIS (ACUTE)                     | 0                                       | 0          | 2                                          | 0.4709        | 0(0-Inf)                 |
| SPHEROCYTOSIS, HEREDITARY                | 1                                       | 10.8727    | 2                                          | 0.6592        | 16.4934(1.4539-187.1084) |
| SPICULE (TOOTH)                          | 3                                       | 20.8824    | 46                                         | 11.4757       | 1.8197(0.5627-5.8847)    |
| SPIDER BURSTS                            | 1                                       | 6.9676     | 64                                         | 14.5326       | 0.4794(0.0663-3.4667)    |
| SPINA BIFIDA, NOS                        | 0                                       | 0          | 2                                          | 1.2659        | 0(0-Inf)                 |
| SPINA BIFIDA, OCCULTA (CONGENITAL)       | 1                                       | 12.9288    | 11                                         | 3.5301        | 3.6624(0.4672-28.707)    |

| Description                                                                  | No. of Positive Cases with Disease Code | Case Rate* | No. of Positive Controls with Disease Code | Control Rate* | Relative Risk (95%CI)    |
|------------------------------------------------------------------------------|-----------------------------------------|------------|--------------------------------------------|---------------|--------------------------|
| SPINDLE (KRUKENBERG'S)                                                       | 1                                       | 7.9453     | 5                                          | 1.2693        | 6.2595(0.7146-54.8267)   |
| SPIRADENOMA                                                                  | 0                                       | 0          | 3                                          | 0.9165        | 0(0-Inf)                 |
| SPLASH, CHEMICAL, EYE                                                        | 0                                       | 0          | 14                                         | 4.4718        | 0(0-Inf)                 |
| SPLAY FOOT-SEE ALSO TALIPES VALGUS                                           | 0                                       | 0          | 10                                         | 2.2114        | 0(0-Inf)                 |
| SPLENITIS                                                                    | 1                                       | 6.8954     | 0                                          | 0             | 12245977123.2325(0-Inf)  |
| SPLENOMEGALY, NOS                                                            | 6                                       | 46.7324    | 62                                         | 21.0571       | 2.2193(0.9555-5.1548)    |
| SPLINTING, MASSETER (MASTICATORY) MUSCLE                                     | 0                                       | 0          | 1                                          | 0.2729        | 0(0-Inf)                 |
| SPLINTING, MUSCLE NEC/NOS                                                    | 1                                       | 11.6645    | 0                                          | 0             | 8824469075.642(0-Inf)    |
| SPLINTS (SHIN)                                                               | 1                                       | 7.0111     | 18                                         | 4.2732        | 1.6407(0.217-12.4068)    |
| SPLIT NAILS                                                                  | 0                                       | 0          | 11                                         | 3.0179        | 0(0-Inf)                 |
| SPONDYLITIS, ANKYLOSING, CODE ALSO SPONDYLITIS BY SITE                       | 1                                       | 7.5263     | 35                                         | 8.9141        | 0.8443(0.1152-6.1853)    |
| SPONDYLITIS, ANKYLOSING, HIP                                                 | 0                                       | 0          | 1                                          | 0.2729        | 0(0-Inf)                 |
| SPONDYLITIS, CERVICAL                                                        | 4                                       | 31.6297    | 78                                         | 26.7963       | 1.1804(0.4306-3.2357)    |
| SPONDYLITIS, LUMBAR                                                          | 0                                       | 0          | 17                                         | 4.6125        | 0(0-Inf)                 |
| SPONDYLITIS, NOS                                                             | 0                                       | 0          | 15                                         | 4.5441        | 0(0-Inf)                 |
| SPONDYLITIS, RHEUMATOID, CODE ALSO SPONDYLITIS, BY SITE                      | 2                                       | 25.3409    | 16                                         | 5.2928        | 4.7878(1.0892-21.045)    |
| SPONDYLITIS, SACRAL                                                          | 1                                       | 7.4819     | 8                                          | 2.469         | 3.0304(0.3725-24.6517)   |
| SPONDYLITIS, THORACIC                                                        | 0                                       | 0          | 5                                          | 1.6797        | 0(0-Inf)                 |
| SPONDYLOARTHROPATHY                                                          | 1                                       | 8.1025     | 10                                         | 3.5969        | 2.2526(0.2848-17.8182)   |
| SPONDYLOLISTHESIS, ACQUIRED, SEE ALSO DEFORMITY SPINE                        | 1                                       | 7.1922     | 48                                         | 13.8783       | 0.5182(0.0713-3.7663)    |
| SPONDYLOLISTHESIS, CERVICAL (CONGENITAL #)                                   | 0                                       | 0          | 17                                         | 6.5132        | 0(0-Inf)                 |
| SPONDYLOLISTHESIS, DEGENERATIVE, SEE ALSO DISEASE, DEGENERATIVE JOINT, SPINE | 0                                       | 0          | 11                                         | 5.9357        | 0(0-Inf)                 |
| SPONDYLOLISTHESIS, LUMBAR (CONGENITAL #)                                     | 4                                       | 27.8301    | 214                                        | 53.3407       | 0.5217(0.1937-1.4051)    |
| SPONDYLOLISTHESIS, NOS (CONGENITAL)                                          | 0                                       | 0          | 89                                         | 21.5862       | 0(0-Inf)                 |
| SPONDYLOLYSIS, ACQUIRED, SEE ALSO DEFORMITY                                  | 0                                       | 0          | 4                                          | 1.5793        | 0(0-Inf)                 |
| SPONDYLOLYSIS, CERVICAL (CONGENITAL #)                                       | 2                                       | 13.8324    | 12                                         | 3.1748        | 4.3569(0.9622-19.7285)   |
| SPONDYLOLYSIS, DEGENERATIVE, SEE ALSO DISEASE, DEGENERATIVE SPINE            | 0                                       | 0          | 1                                          | 0.3526        | 0(0-Inf)                 |
| SPONDYLOLYSIS, LUMBAR (CONGENITAL #)                                         | 1                                       | 7.6324     | 51                                         | 12.6258       | 0.6045(0.0833-4.3875)    |
| SPONDYLOLYSIS, NOS (CONGENITAL)                                              | 0                                       | 0          | 22                                         | 5.2971        | 0(0-Inf)                 |
| SPONDYLOSIS VERTEBRA NOS-SEE ALSO DISEASE DEGENERATIVE SPINE                 | 0                                       | 0          | 55                                         | 25.6552       | 0(0-Inf)                 |
| SPONGE KIDNEY (MEDULLARY)                                                    | 1                                       | 9.5078     | 27                                         | 7.4781        | 1.2714(0.1719-9.4058)    |
| SPONGIOSIS                                                                   | 0                                       | 0          | 33                                         | 11.4682       | 0(0-Inf)                 |
| SPOON NAIL                                                                   | 1                                       | 14.0315    | 1                                          | 0.8075        | 17.3774(1.0515-287.1763) |
| SPOROTRICHOSIS                                                               | 0                                       | 0          | 3                                          | 0.8712        | 0(0-Inf)                 |
| SPOT, COTTON-WOOL (RETINA)                                                   | 1                                       | 7.7301     | 10                                         | 3.3315        | 2.3203(0.2934-18.3497)   |
| SPOT, FORDYCE (ACQUIRED)                                                     | 0                                       | 0          | 10                                         | 3.0526        | 0(0-Inf)                 |
| SPOT, FUCHS                                                                  | 0                                       | 0          | 1                                          | 0.234         | 0(0-Inf)                 |

| Description                                    | No. of Positive Cases with Disease Code | Case Rate* | No. of Positive Controls with Disease Code | Control Rate* | Relative Risk (95%CI)  |
|------------------------------------------------|-----------------------------------------|------------|--------------------------------------------|---------------|------------------------|
| SPOT, ROTH                                     | 0                                       | 0          | 1                                          | 0.2729        | 0(0-Inf)               |
| SPOTTING, INTERMENSTRUAL-SEE ALSO METRORRHAGIA | 1                                       | 26.2537    | 98                                         | 54.6276       | 0.4806(0.0669-3.4508)  |
| SPRAIN, ACHILLES TENDON                        | 1                                       | 8.2119     | 20                                         | 5.1641        | 1.5902(0.212-11.9301)  |
| SPRAIN, ACROMIOCLAVICULAR                      | 1                                       | 8.1646     | 75                                         | 18.9083       | 0.4318(0.0599-3.1114)  |
| SPRAIN, ANKLE                                  | 60                                      | 486.6822   | 1785                                       | 444.5771      | 1.0947(0.8458-1.4169)  |
| SPRAIN, ANKLE, RECURRENT                       | 0                                       | 0          | 6                                          | 1.7724        | 0(0-Inf)               |
| SPRAIN, ARM                                    | 1                                       | 7.1573     | 89                                         | 21.3561       | 0.3351(0.0466-2.41)    |
| SPRAIN, BACK                                   | 20                                      | 155.076    | 461                                        | 111.3559      | 1.3926(0.8886-2.1824)  |
| SPRAIN, CALCANEOFIBULAR                        | 2                                       | 24.8472    | 19                                         | 5.5549        | 4.473(1.0312-19.4033)  |
| SPRAIN, CARPAL JOINT (WRIST#)                  | 0                                       | 0          | 8                                          | 2.6181        | 0(0-Inf)               |
| SPRAIN, CARPOMETACARPAL (HAND#)                | 0                                       | 0          | 15                                         | 3.7458        | 0(0-Inf)               |
| SPRAIN, CARTILAGE, COSTAL                      | 0                                       | 0          | 1                                          | 0.2354        | 0(0-Inf)               |
| SPRAIN, CERVICAL                               | 13                                      | 95.1247    | 660                                        | 159.3206      | 0.5971(0.3445-1.0347)  |
| SPRAIN, CHEST WALL                             | 5                                       | 38.0135    | 74                                         | 23.8262       | 1.5954(0.6424-3.9627)  |
| SPRAIN, CHONDROCOSTAL                          | 2                                       | 16.0394    | 23                                         | 5.5637        | 2.8828(0.6733-12.3427) |
| SPRAIN, CHONDROSTERNAL                         | 0                                       | 0          | 3                                          | 0.7798        | 0(0-Inf)               |
| SPRAIN, CLAVICLE                               | 0                                       | 0          | 5                                          | 2.22          | 0(0-Inf)               |
| SPRAIN, COCCYX                                 | 0                                       | 0          | 7                                          | 1.5623        | 0(0-Inf)               |
| SPRAIN, COLLAR BONE                            | 0                                       | 0          | 1                                          | 0.4751        | 0(0-Inf)               |
| SPRAIN, COLLATERAL LIGAMENT, KNEE              | 13                                      | 102.8397   | 325                                        | 79.6648       | 1.2909(0.7402-2.2512)  |
| SPRAIN, CORACOACROMIAL                         | 0                                       | 0          | 1                                          | 0.4049        | 0(0-Inf)               |
| SPRAIN, CORACOID                               | 0                                       | 0          | 3                                          | 1.3475        | 0(0-Inf)               |
| SPRAIN, CRUCIATE LIGAMENT, KNEE                | 0                                       | 0          | 5                                          | 1.1788        | 0(0-Inf)               |
| SPRAIN, DELTOID, ANKLE                         | 0                                       | 0          | 35                                         | 8.8651        | 0(0-Inf)               |
| SPRAIN, DELTOID, SHOULDER                      | 1                                       | 8.5479     | 33                                         | 8.1564        | 1.048(0.1426-7.7012)   |
| SPRAIN, DORSAL SPINE                           | 0                                       | 0          | 6                                          | 1.6487        | 0(0-Inf)               |
| SPRAIN, ELBOW                                  | 0                                       | 0          | 61                                         | 15.3291       | 0(0-Inf)               |
| SPRAIN, FEMUR, DISTAL END (KNEE#)              | 0                                       | 0          | 1                                          | 0.2354        | 0(0-Inf)               |
| SPRAIN, FEMUR, PROXIMAL END (HIP#)             | 0                                       | 0          | 1                                          | 0.2729        | 0(0-Inf)               |
| SPRAIN, FIBULA, DISTAL (ANKLE#)                | 0                                       | 0          | 3                                          | 0.7461        | 0(0-Inf)               |
| SPRAIN, FIBULA, PROXIMAL END (KNEE#)           | 0                                       | 0          | 1                                          | 0.2354        | 0(0-Inf)               |
| SPRAIN, FIBULOCALCANEAL                        | 0                                       | 0          | 4                                          | 2.1973        | 0(0-Inf)               |
| SPRAIN, FINGER                                 | 5                                       | 46.9945    | 212                                        | 55.4197       | 0.848(0.3487-2.0619)   |
| SPRAIN, FOOT                                   | 12                                      | 95.3654    | 341                                        | 80.1467       | 1.1899(0.6679-2.1197)  |
| SPRAIN, FOREARM                                | 2                                       | 15.9515    | 46                                         | 11.1263       | 1.4337(0.3463-5.9354)  |
| SPRAIN, GASTROCNEMIUS                          | 1                                       | 7.5702     | 47                                         | 14.9762       | 0.5055(0.0695-3.6752)  |
| SPRAIN, GLENOID                                | 0                                       | 0          | 1                                          | 0.4751        | 0(0-Inf)               |
| SPRAIN, HAMSTRING                              | 2                                       | 14.0942    | 79                                         | 21.253        | 0.6632(0.1625-2.7063)  |
| SPRAIN, HAND                                   | 2                                       | 14.2574    | 85                                         | 20.2769       | 0.7031(0.1725-2.8653)  |
| SPRAIN, HIP                                    | 7                                       | 48.9665    | 133                                        | 33.7659       | 1.4502(0.676-3.1108)   |

| Description                              | No. of Positive Cases with Disease Code | Case Rate* | No. of Positive Controls with Disease Code | Control Rate* | Relative Risk (95%CI)  |
|------------------------------------------|-----------------------------------------|------------|--------------------------------------------|---------------|------------------------|
| SPRAIN, HUMERUS                          | 0                                       | 0          | 2                                          | 0.5475        | 0(0-Inf)               |
| SPRAIN, INFRASPINATUS (UPPER EXTREMITY#) | 1                                       | 7.0818     | 4                                          | 1.1283        | 6.2766(0.6831-57.672)  |
| SPRAIN, INNOMINATE, SACRAL JUNCTION      | 0                                       | 0          | 1                                          | 0.234         | 0(0-Inf)               |
| SPRAIN, INTERPHALANGEAL, FINGER          | 3                                       | 31.2052    | 51                                         | 14.0094       | 2.2274(0.6917-7.1731)  |
| SPRAIN, INTERPHALANGEAL, TOE             | 0                                       | 0          | 4                                          | 1.4119        | 0(0-Inf)               |
| SPRAIN, ISCHIOCAPSULAR                   | 0                                       | 0          | 1                                          | 0.234         | 0(0-Inf)               |
| SPRAIN, KNEE                             | 29                                      | 209.7331   | 646                                        | 157.42        | 1.3323(0.9171-1.9355)  |
| SPRAIN, LATERAL COLLATERAL, KNEE         | 0                                       | 0          | 23                                         | 5.7378        | 0(0-Inf)               |
| SPRAIN, LATISSIMUS (DORSI)               | 0                                       | 0          | 1                                          | 0.234         | 0(0-Inf)               |
| SPRAIN, LEG                              | 5                                       | 39.1042    | 218                                        | 52.699        | 0.742(0.3053-1.8037)   |
| SPRAIN, LIGAMENTUM TERES                 | 5                                       | 43.9539    | 94                                         | 24.4084       | 1.8008(0.7299-4.4427)  |
| SPRAIN, LOW BACK                         | 25                                      | 220.6002   | 984                                        | 256.4457      | 0.8602(0.5779-1.2805)  |
| SPRAIN, LUMBOSACRAL                      | 13                                      | 140.9254   | 229                                        | 64.9277       | 2.1705(1.2383-3.8046)  |
| SPRAIN, MENISCUS, KNEE                   | 0                                       | 0          | 1                                          | 0.3526        | 0(0-Inf)               |
| SPRAIN, METACARPAL                       | 0                                       | 0          | 6                                          | 2.0921        | 0(0-Inf)               |
| SPRAIN, METACARPOPHALANGEAL              | 1                                       | 8.7774     | 70                                         | 17.8377       | 0.4921(0.0682-3.5506)  |
| SPRAIN, METATARSAL                       | 0                                       | 0          | 12                                         | 3.4413        | 0(0-Inf)               |
| SPRAIN, METATARSOPHALANGEAL              | 0                                       | 0          | 22                                         | 6.653         | 0(0-Inf)               |
| SPRAIN, MIDCARPAL                        | 0                                       | 0          | 1                                          | 0.2729        | 0(0-Inf)               |
| SPRAIN, MIDCARPAL JOINT                  | 0                                       | 0          | 1                                          | 0.398         | 0(0-Inf)               |
| SPRAIN, MIDTARSAL                        | 0                                       | 0          | 1                                          | 0.234         | 0(0-Inf)               |
| SPRAIN, MULTIPLE SITES                   | 0                                       | 0          | 3                                          | 0.8036        | 0(0-Inf)               |
| SPRAIN, NECK                             | 10                                      | 74.1132    | 302                                        | 71.6222       | 1.0348(0.5502-1.9463)  |
| SPRAIN, NOS                              | 10                                      | 90.3009    | 256                                        | 66.6296       | 1.3553(0.7191-2.5542)  |
| SPRAIN, PATELLA                          | 0                                       | 0          | 9                                          | 2.5795        | 0(0-Inf)               |
| SPRAIN, PELVIS                           | 1                                       | 6.9403     | 8                                          | 1.9975        | 3.4745(0.4266-28.3009) |
| SPRAIN, PHALANX, FINGER                  | 1                                       | 15.0125    | 5                                          | 1.8506        | 8.1121(0.929-70.8354)  |
| SPRAIN, POSTERIOR TIBIAL                 | 0                                       | 0          | 1                                          | 0.2354        | 0(0-Inf)               |
| SPRAIN, QUADRICEPS (FEMORIS)             | 0                                       | 0          | 16                                         | 4.9323        | 0(0-Inf)               |
| SPRAIN, RADIUS, DISTAL END               | 0                                       | 0          | 5                                          | 1.6985        | 0(0-Inf)               |
| SPRAIN, RADIUS, PROXIMAL END             | 0                                       | 0          | 1                                          | 0.2729        | 0(0-Inf)               |
| SPRAIN, RHOMBOID                         | 3                                       | 21.9638    | 51                                         | 15.1788       | 1.447(0.4494-4.6591)   |
| SPRAIN, RIB                              | 1                                       | 6.9549     | 27                                         | 6.7759        | 1.0264(0.1387-7.5932)  |
| SPRAIN, ROTATOR CUFF                     | 4                                       | 27.7533    | 162                                        | 42.0599       | 0.6599(0.2443-1.7826)  |
| SPRAIN, SACROCOCCYGEAL                   | 0                                       | 0          | 2                                          | 0.8723        | 0(0-Inf)               |
| SPRAIN, SACROILIAC JOINT REGION          | 6                                       | 42.0995    | 87                                         | 20.4944       | 2.0542(0.8939-4.7205)  |
| SPRAIN, SACRUM                           | 1                                       | 9.3378     | 11                                         | 2.7141        | 3.4404(0.4379-27.0313) |
| SPRAIN, SCAPULA                          | 3                                       | 29.2316    | 109                                        | 28.7995       | 1.015(0.3215-3.2044)   |
| SPRAIN, SHOULDER                         | 21                                      | 161.8717   | 498                                        | 119.8498      | 1.3506(0.8714-2.0933)  |
| SPRAIN, SPINE                            | 0                                       | 0          | 41                                         | 9.6666        | 0(0-Inf)               |

| Description                           | No. of Positive Cases with Disease Code | Case Rate* | No. of Positive Controls with Disease Code | Control Rate* | Relative Risk (95%CI)   |
|---------------------------------------|-----------------------------------------|------------|--------------------------------------------|---------------|-------------------------|
| SPRAIN, SPINE, CERVICAL               | 5                                       | 37.1143    | 94                                         | 22.089        | 1.6802(0.6807-4.1472)   |
| SPRAIN, SPINE, COCCYX                 | 0                                       | 0          | 1                                          | 0.398         | 0(0-Inf)                |
| SPRAIN, SPINE, DORSAL                 | 0                                       | 0          | 1                                          | 0.398         | 0(0-Inf)                |
| SPRAIN, SPINE, LUMBAR                 | 23                                      | 193.0678   | 628                                        | 157.0133      | 1.2296(0.8101-1.8665)   |
| SPRAIN, SPINE, LUMBOSACRAL            | 0                                       | 0          | 24                                         | 6.4445        | 0(0-Inf)                |
| SPRAIN, SPINE, SACRAL                 | 0                                       | 0          | 6                                          | 1.5038        | 0(0-Inf)                |
| SPRAIN, SPINE, SACROILIAC             | 2                                       | 13.9101    | 30                                         | 7.6365        | 1.8215(0.4321-7.6794)   |
| SPRAIN, SPINE, THORACIC               | 4                                       | 32.0568    | 90                                         | 21.6701       | 1.4793(0.5415-4.0416)   |
| SPRAIN, STERNOCLEIDOMASTOID           | 0                                       | 0          | 8                                          | 2.5173        | 0(0-Inf)                |
| SPRAIN, STERNUM                       | 0                                       | 0          | 5                                          | 1.3793        | 0(0-Inf)                |
| SPRAIN, SUPRASPINATUS                 | 3                                       | 20.862     | 17                                         | 4.3249        | 4.8237(1.3943-16.6882)  |
| SPRAIN, SYMPHYSIS, PUBIS              | 1                                       | 10.1094    | 0                                          | 0             | 14216316098.8207(0-Inf) |
| SPRAIN, TALOFIBULAR                   | 9                                       | 118.0901   | 290                                        | 90.4042       | 1.3062(0.6718-2.54)     |
| SPRAIN, TARSAL                        | 0                                       | 0          | 5                                          | 1.2481        | 0(0-Inf)                |
| SPRAIN, TARSOMETATARSAL               | 0                                       | 0          | 5                                          | 1.5959        | 0(0-Inf)                |
| SPRAIN, TEMPOROMANDIBULAR             | 0                                       | 0          | 6                                          | 1.3708        | 0(0-Inf)                |
| SPRAIN, TENSOR FASCIA LATA            | 0                                       | 0          | 1                                          | 0.234         | 0(0-Inf)                |
| SPRAIN, THIGH                         | 2                                       | 15.9313    | 31                                         | 10.7465       | 1.4825(0.3526-6.2333)   |
| SPRAIN, THIGH, PROXIMAL END           | 2                                       | 15.8932    | 11                                         | 2.5701        | 6.184(1.346-28.4115)    |
| SPRAIN, THORAX                        | 3                                       | 27.6401    | 135                                        | 34.5403       | 0.8002(0.2544-2.5174)   |
| SPRAIN, THUMB                         | 2                                       | 18.19      | 141                                        | 35.7283       | 0.5091(0.1259-2.0593)   |
| SPRAIN, TIBIA, DISTAL                 | 0                                       | 0          | 3                                          | 1.1482        | 0(0-Inf)                |
| SPRAIN, TIBIA, PROXIMAL END           | 0                                       | 0          | 1                                          | 0.4048        | 0(0-Inf)                |
| SPRAIN, TIBIAL, ANTERIOR              | 0                                       | 0          | 1                                          | 0.2729        | 0(0-Inf)                |
| SPRAIN, TIBIOFIBULAR JOINT, SUPERIOR  | 0                                       | 0          | 2                                          | 0.8723        | 0(0-Inf)                |
| SPRAIN, TIBIOFIBULAR, DISTAL (ANKLE#) | 0                                       | 0          | 6                                          | 1.4658        | 0(0-Inf)                |
| SPRAIN, TOE, NOS                      | 1                                       | 9.5584     | 56                                         | 14.0586       | 0.6799(0.0938-4.9268)   |
| SPRAIN, TRAPEZIUS                     | 3                                       | 21.6578    | 106                                        | 30.3966       | 0.7125(0.2256-2.2503)   |
| SPRAIN, ULNA, DISTAL END              | 0                                       | 0          | 7                                          | 1.6697        | 0(0-Inf)                |
| SPRAIN, ULNA, PROXIMAL END            | 0                                       | 0          | 1                                          | 0.2729        | 0(0-Inf)                |
| SPRAIN, WRIST                         | 18                                      | 130.9285   | 603                                        | 144.8235      | 0.9041(0.565-1.4465)    |
| SPRUE, CELIAC                         | 0                                       | 0          | 34                                         | 9.8589        | 0(0-Inf)                |
| SPRUE, NONTROPICAL                    | 0                                       | 0          | 6                                          | 1.4228        | 0(0-Inf)                |
| SPRUE, NOS                            | 0                                       | 0          | 25                                         | 7.2446        | 0(0-Inf)                |
| SPUR, BONE, CALCANEAL                 | 7                                       | 48.9259    | 175                                        | 42.7075       | 1.1456(0.5368-2.4448)   |
| SPUR, BONE, NOS                       | 2                                       | 13.8774    | 107                                        | 26.8126       | 0.5176(0.1275-2.1005)   |
| SPUR, LUNG                            | 0                                       | 0          | 1                                          | 2.4858        | 0(0-Inf)                |
| SPUR, NASAL                           | 0                                       | 0          | 23                                         | 5.8254        | 0(0-Inf)                |
| STAIN, BILE, STOMACH (STAINING)       | 0                                       | 0          | 5                                          | 2.276         | 0(0-Inf)                |
| STAIN, BLOOD, CORNEA                  | 0                                       | 0          | 6                                          | 1.4352        | 0(0-Inf)                |

| Description                                    | No. of Positive Cases with Disease Code | Case Rate* | No. of Positive Controls with Disease Code | Control Rate* | Relative Risk (95%CI)   |
|------------------------------------------------|-----------------------------------------|------------|--------------------------------------------|---------------|-------------------------|
| STAIN, METALS ON TEETH                         | 0                                       | 0          | 2                                          | 0.631         | 0(0-Inf)                |
| STAIN, ON TEETH                                | 0                                       | 0          | 3                                          | 0.6548        | 0(0-Inf)                |
| STAMMERING                                     | 0                                       | 0          | 1                                          | 0.4751        | 0(0-Inf)                |
| STAPHYLOMA, NOS                                | 0                                       | 0          | 4                                          | 1.8404        | 0(0-Inf)                |
| STAPHYLOMA, POSTERIOR                          | 0                                       | 0          | 1                                          | 0.234         | 0(0-Inf)                |
| STARVATION                                     | 0                                       | 0          | 2                                          | 0.8096        | 0(0-Inf)                |
| STASIS, BILE                                   | 1                                       | 7.6688     | 3                                          | 0.7651        | 10.0238(1.0111-99.369)  |
| STASIS, FOOT                                   | 0                                       | 0          | 3                                          | 1.148         | 0(0-Inf)                |
| STASIS, PIGMENTATION                           | 0                                       | 0          | 7                                          | 2.3227        | 0(0-Inf)                |
| STASIS, VENOUS                                 | 17                                      | 165.5738   | 226                                        | 106.747       | 1.5511(0.9455-2.5444)   |
| STATUS, AMPUTATION, LEG, NOS                   | 1                                       | 15.1328    | 4                                          | 3.5544        | 4.2575(0.4691-38.6415)  |
| STATUS, ABLATION CORONARY (ARTERY)             | 4                                       | 36.4868    | 160                                        | 69.6327       | 0.524(0.194-1.4154)     |
| STATUS, AMPUTATION, ANKLE                      | 1                                       | 7.1859     | 0                                          | 0             | 12730578968.7317(0-Inf) |
| STATUS, AMPUTATION, ARM ABOVE ELBOW            | 0                                       | 0          | 2                                          | 0.7052        | 0(0-Inf)                |
| STATUS, AMPUTATION, ARM BELOW ELBOW            | 0                                       | 0          | 3                                          | 0.8189        | 0(0-Inf)                |
| STATUS, AMPUTATION, FINGER(S), EXCLUDING THUMB | 0                                       | 0          | 36                                         | 14.9133       | 0(0-Inf)                |
| STATUS, AMPUTATION, FOOT                       | 1                                       | 8.8536     | 7                                          | 2.9086        | 3.044(0.3688-25.1256)   |
| STATUS, AMPUTATION, HAND                       | 0                                       | 0          | 1                                          | 0.3526        | 0(0-Inf)                |
| STATUS, AMPUTATION, LEG ABOVE KNEE             | 2                                       | 26.8097    | 27                                         | 20.2573       | 1.3235(0.3135-5.5878)   |
| STATUS, AMPUTATION, LEG BELOW KNEE             | 3                                       | 28.3907    | 51                                         | 23.5218       | 1.207(0.3753-3.8814)    |
| STATUS, AMPUTATION, LEG, BILATERAL             | 0                                       | 0          | 8                                          | 7.4504        | 0(0-Inf)                |
| STATUS, AMPUTATION, THUMB                      | 0                                       | 0          | 7                                          | 2.7539        | 0(0-Inf)                |
| STATUS, AMPUTATION, TOES                       | 3                                       | 31.9313    | 62                                         | 33.6957       | 0.9476(0.2967-3.0269)   |
| STATUS, ANASTOMOSIS ESOPHAGUS/CARDIA           | 0                                       | 0          | 2                                          | 0.432         | 0(0-Inf)                |
| STATUS, ANASTOMOSIS GASTRIC, NEC/NOS           | 0                                       | 0          | 4                                          | 3.7961        | 0(0-Inf)                |
| STATUS, ANASTOMOSIS URINARY                    | 1                                       | 17.1891    | 17                                         | 14.0244       | 1.2257(0.1623-9.2579)   |
| STATUS, ARTHRODESIS, ANKLE                     | 1                                       | 7.1754     | 39                                         | 11.0675       | 0.6483(0.0887-4.7383)   |
| STATUS, ARTHRODESIS, HIP                       | 0                                       | 0          | 6                                          | 1.5038        | 0(0-Inf)                |
| STATUS, ARTHRODESIS, KNEE                      | 0                                       | 0          | 3                                          | 0.9165        | 0(0-Inf)                |
| STATUS, ARTHRODESIS, NOS                       | 4                                       | 28.0011    | 108                                        | 27.8652       | 1.0049(0.3693-2.7346)   |
| STATUS, ARTHRODESIS, SHOULDER                  | 0                                       | 0          | 3                                          | 1.5112        | 0(0-Inf)                |
| STATUS, ARTHRODESIS, SPINE--SAS                | 2                                       | 14.7775    | 56                                         | 13.3048       | 1.1107(0.2699-4.5703)   |
| STATUS, ARTHRODESIS, WRIST                     | 2                                       | 14.7824    | 17                                         | 4.0197        | 3.6774(0.8391-16.1164)  |
| STATUS, ARTHROPLASTY, ANKLE                    | 0                                       | 0          | 3                                          | 0.8018        | 0(0-Inf)                |
| STATUS, ARTHROPLASTY, ELBOW                    | 2                                       | 15.7509    | 12                                         | 4.1007        | 3.841(0.8478-17.4029)   |
| STATUS, ARTHROPLASTY, FINGER                   | 0                                       | 0          | 34                                         | 7.8658        | 0(0-Inf)                |
| STATUS, ARTHROPLASTY, HIP--THA                 | 57                                      | 618.5452   | 994                                        | 534.4496      | 1.1573(0.8854-1.5128)   |
| STATUS, ARTHROPLASTY, KNEE--TKA                | 44                                      | 408.2307   | 963                                        | 410.538       | 0.9944(0.7345-1.3463)   |
| STATUS, ARTHROPLASTY, NEC                      | 2                                       | 16.789     | 63                                         | 23.9855       | 0.7(0.1707-2.8697)      |
| STATUS, ARTHROPLASTY, SHOULDER                 | 3                                       | 30.1016    | 87                                         | 43.8376       | 0.6867(0.2167-2.1756)   |

| Description                                                     | No. of Positive Cases with Disease Code | Case Rate* | No. of Positive Controls with Disease Code | Control Rate* | Relative Risk (95%CI)    |
|-----------------------------------------------------------------|-----------------------------------------|------------|--------------------------------------------|---------------|--------------------------|
| STATUS, ARTHROPLASTY, TEMPOROMANDIBULAR                         | 0                                       | 0          | 1                                          | 0.2354        | 0(0-Inf)                 |
| STATUS, ARTHROPLASTY, THUMB                                     | 0                                       | 0          | 50                                         | 11.3937       | 0(0-Inf)                 |
| STATUS, ARTHROPLASTY, TOE                                       | 1                                       | 7.5817     | 17                                         | 5.3765        | 1.4101(0.186-10.69)      |
| STATUS, ARTHROPLASTY, WRIST                                     | 0                                       | 0          | 17                                         | 4.0571        | 0(0-Inf)                 |
| STATUS, ARTIFICIAL EYE                                          | 3                                       | 27.0726    | 5                                          | 2.1758        | 12.4424(2.9194-53.0297)  |
| STATUS, ARTIFICIAL GENITOURINARY SPHINCTER (DEACTIVATION)       | 1                                       | 27.1262    | 14                                         | 21.2559       | 1.2762(0.167-9.7505)     |
| STATUS, ARTIFICIAL LENS                                         | 48                                      | 589.133    | 954                                        | 607.1921      | 0.9703(0.7255-1.2975)    |
| STATUS, ARTIFICIAL OPENING OF URINARY TRACT, NEC                | 0                                       | 0          | 2                                          | 0.7896        | 0(0-Inf)                 |
| STATUS, ASTHMATICUS                                             | 0                                       | 0          | 2                                          | 0.432         | 0(0-Inf)                 |
| STATUS, ATHERECTOMY, CORONARY ARTERY                            | 1                                       | 8.068      | 31                                         | 11.2469       | 0.7174(0.0976-5.2748)    |
| STATUS, AUTOTRANSPLANT, NEC                                     | 0                                       | 0          | 5                                          | 1.3365        | 0(0-Inf)                 |
| STATUS, BALLOON DILATATION, ARTERY, NEC/NOS                     | 0                                       | 0          | 5                                          | 2.0352        | 0(0-Inf)                 |
| STATUS, BALLOON DILATATION, BILIARY                             | 0                                       | 0          | 1                                          | 0.3526        | 0(0-Inf)                 |
| STATUS, BALLOON DILATATION, CAROTID ARTERY                      | 0                                       | 0          | 8                                          | 3.7799        | 0(0-Inf)                 |
| STATUS, BALLOON DILATATION, DUODENUM/SMALL BOWEL                | 0                                       | 0          | 1                                          | 0.234         | 0(0-Inf)                 |
| STATUS, BALLOON DILATATION, ESOPHAGEAL/GE                       | 2                                       | 19.1247    | 42                                         | 19.63         | 0.9743(0.2349-4.0401)    |
| STATUS, BALLOON DILATATION, MESENTERIC ARTERY                   | 0                                       | 0          | 2                                          | 1.1971        | 0(0-Inf)                 |
| STATUS, BALLOON DILATATION, PERIPHERAL ARTERY (ILIAC) (FEMORAL) | 2                                       | 18.1314    | 56                                         | 24.18         | 0.7499(0.1824-3.0819)    |
| STATUS, BALLOON DILATATION, PYLORUS/GASTRIC                     | 1                                       | 16.968     | 1                                          | 0.3244        | 52.3016(3.1569-866.4892) |
| STATUS, BALLOON DILATATION, RENAL ARTERY                        | 3                                       | 25.8953    | 51                                         | 20.2264       | 1.2803(0.3978-4.1202)    |
| STATUS, BALLOON DILATATION, SUBCLAVIAN ARTERY                   | 0                                       | 0          | 1                                          | 0.2354        | 0(0-Inf)                 |
| STATUS, BALLOON DILATATION, URETERAL/GENITOURINARY              | 0                                       | 0          | 6                                          | 4.0969        | 0(0-Inf)                 |
| STATUS, BALLOON INTRA-AORTIC PUMP                               | 0                                       | 0          | 57                                         | 24.368        | 0(0-Inf)                 |
| STATUS, BALLOON MITRAL VALVULOPLASTY/VALVOTOMY                  | 1                                       | 8.099      | 11                                         | 3.9634        | 2.0435(0.2609-16.0059)   |
| STATUS, BARIATRIC SURGERY                                       | 0                                       | 0          | 14                                         | 3.4198        | 0(0-Inf)                 |
| STATUS, BILIARY ANASTOMOSIS                                     | 1                                       | 9.3346     | 9                                          | 4.0618        | 2.2981(0.2876-18.3641)   |
| STATUS, BILIARY TUBE (CHANGE) (REMOVAL)                         | 0                                       | 0          | 31                                         | 23.8808       | 0(0-Inf)                 |
| STATUS, BILLROTH I OR II                                        | 4                                       | 37.8783    | 60                                         | 27.6109       | 1.3719(0.4968-3.7886)    |
| STATUS, BONE GRAFT                                              | 2                                       | 15.1917    | 93                                         | 29.6924       | 0.5116(0.1258-2.0812)    |
| STATUS, CANNULA                                                 | 2                                       | 21.8974    | 32                                         | 18.1988       | 1.2032(0.2872-5.0412)    |
| STATUS, CARDIOVERTER DEFIBRILLATOR (AUTOMATIC) (AICD)           | 2                                       | 22.548     | 131                                        | 78.0385       | 0.2889(0.0714-1.1687)    |
| STATUS, CATHETER (VENOUS) (HICKMAN) (PORTA-CATH)                | 2                                       | 15.3839    | 29                                         | 9.5548        | 1.6101(0.3817-6.791)     |
| STATUS, CATHETER URINARY (ANY)                                  | 11                                      | 133.9387   | 207                                        | 136.3022      | 0.9827(0.5351-1.8047)    |
| STATUS, CEREBRAL ARTERY BYPASS                                  | 0                                       | 0          | 5                                          | 1.4865        | 0(0-Inf)                 |
| STATUS, COLOSTOMY (HARTMANN)                                    | 14                                      | 137.7761   | 202                                        | 97.6812       | 1.4105(0.8189-2.4294)    |
| STATUS, CORONARY ARTERY BYPASS GRAFT--CABG                      | 45                                      | 441.3407   | 1234                                       | 589.4865      | 0.7487(0.5557-1.0087)    |
| STATUS, CYSTOSTOMY                                              | 0                                       | 0          | 16                                         | 6.4311        | 0(0-Inf)                 |
| STATUS, DEVICE, FUNCTIONING NEC                                 | 4                                       | 32.5713    | 61                                         | 21.8107       | 1.4934(0.5406-4.125)     |



| Description                                              | No. of Positive Cases with Disease Code | Case Rate* | No. of Positive Controls with Disease Code | Control Rate* | Relative Risk (95%CI)  |
|----------------------------------------------------------|-----------------------------------------|------------|--------------------------------------------|---------------|------------------------|
| STATUS, ENDARTERECTOMY                                   | 10                                      | 101.2069   | 275                                        | 139.6216      | 0.7249(0.3852-1.364)   |
| STATUS, ENDOTRACHEAL TUBE                                | 0                                       | 0          | 2                                          | 3.081         | 0(0-Inf)               |
| STATUS, ENTEROSTOMY                                      | 1                                       | 7.1535     | 3                                          | 0.8872        | 8.0631(0.8147-79.7958) |
| STATUS, EPILEPTICUS                                      | 2                                       | 18.7976    | 17                                         | 7.7795        | 2.4163(0.553-10.5575)  |
| STATUS, ESOPHAGOGASTROSTOMY                              | 0                                       | 0          | 1                                          | 0.3526        | 0(0-Inf)               |
| STATUS, ESOPHAGOJEJUNOSTOMY                              | 1                                       | 8.2137     | 6                                          | 2.2225        | 3.6956(0.437-31.2498)  |
| STATUS, EXTERNAL FIXATION DEVICE (ORTHO)                 | 3                                       | 24.1346    | 61                                         | 21.5757       | 1.1186(0.3495-3.5798)  |
| STATUS, FILTERING DEVICE (VENOUS)                        | 3                                       | 33.3623    | 53                                         | 30.9633       | 1.0775(0.3356-3.4594)  |
| STATUS, FUNDOPLICATION (IVOR - LEWIS)                    | 2                                       | 16.3399    | 74                                         | 27.1579       | 0.6017(0.1473-2.4568)  |
| STATUS, GASTROENTEROSTOMY                                | 4                                       | 28.5388    | 78                                         | 21.7921       | 1.3096(0.4776-3.5908)  |
| STATUS, GASTROSTOMY                                      | 0                                       | 0          | 7                                          | 3.1223        | 0(0-Inf)               |
| STATUS, GASTROSTOMY/FEEDING TUBE PLACEMENT/ REMOVAL      | 8                                       | 100.227    | 126                                        | 86.8686       | 1.1538(0.5635-2.3623)  |
| STATUS, HEARING DEVICE/COCHLEAR IMPLANT/SPEECH PROCESSOR | 5                                       | 54.0666    | 42                                         | 23.3678       | 2.3137(0.9109-5.8768)  |
| STATUS, ILEAL CONDUIT                                    | 3                                       | 34.3788    | 29                                         | 17.5908       | 1.9544(0.5923-6.4488)  |
| STATUS, ILEOSTOMY                                        | 8                                       | 59.062     | 105                                        | 31.8494       | 1.8544(0.9003-3.8197)  |
| STATUS, ILEOSTOMY-ILEAL CONDUIT                          | 1                                       | 8.8245     | 14                                         | 5.8183        | 1.5167(0.1979-11.6237) |
| STATUS, IMPLANT TMJ/DENTAL, NEC                          | 4                                       | 29.6496    | 142                                        | 43.2442       | 0.6856(0.2533-1.856)   |
| STATUS, IMPLANT, FUNCTIONING                             | 1                                       | 8.5346     | 14                                         | 5.4769        | 1.5583(0.2031-11.959)  |
| STATUS, INTESTINAL ANASTOMOSIS                           | 11                                      | 114.7743   | 221                                        | 117.3835      | 0.9778(0.5328-1.7943)  |
| STATUS, INTESTINAL BYPASS (FOR OBESITY)                  | 0                                       | 0          | 22                                         | 4.9521        | 0(0-Inf)               |
| STATUS, INTRAUTERINE DEVICE                              | 0                                       | 0          | 18                                         | 23.3622       | 0(0-Inf)               |
| STATUS, KERATOPLASTY                                     | 1                                       | 9.0293     | 32                                         | 13.7655       | 0.6559(0.0893-4.8189)  |
| STATUS, MUSCLE GRAFT                                     | 0                                       | 0          | 2                                          | 1.0783        | 0(0-Inf)               |
| STATUS, MYOCUTANEOUS FLAP                                | 3                                       | 23.7158    | 50                                         | 17.1487       | 1.383(0.4293-4.4549)   |
| STATUS, MYRINGOTOMY/ANY EAR TUBE NEC                     | 2                                       | 18.1041    | 56                                         | 24.06         | 0.7525(0.183-3.0932)   |
| STATUS, NEOBLADDER                                       | 0                                       | 0          | 5                                          | 1.3505        | 0(0-Inf)               |
| STATUS, NEPHROSTOMY                                      | 1                                       | 9.839      | 13                                         | 6.3519        | 1.549(0.2009-11.9412)  |
| STATUS, NERVE GRAFT                                      | 0                                       | 0          | 5                                          | 2.0026        | 0(0-Inf)               |
| STATUS, NERVE STIMULATOR                                 | 0                                       | 0          | 6                                          | 1.881         | 0(0-Inf)               |
| STATUS, OSSEOUS-INTEGRATED TITANIUM IMPLANTS             | 6                                       | 41.813     | 187                                        | 47.4918       | 0.8804(0.3897-1.9891)  |
| STATUS, OSTEOTOMY                                        | 7                                       | 48.9772    | 168                                        | 40.9522       | 1.196(0.5601-2.5539)   |
| STATUS, PACEMAKER                                        | 32                                      | 428.0993   | 612                                        | 458.9109      | 0.9329(0.6533-1.3321)  |
| STATUS, PESSARY                                          | 1                                       | 22.9707    | 19                                         | 25.4033       | 0.9042(0.1204-6.7885)  |
| STATUS, POST CATARACT EXTRACTION (FILTERING BLEB)        | 0                                       | 0          | 27                                         | 15.1337       | 0(0-Inf)               |
| STATUS, POST EYE SURGERY                                 | 47                                      | 500.5729   | 1078                                       | 574.1441      | 0.8719(0.6506-1.1684)  |
| STATUS, POST FUSION SPINE                                | 6                                       | 46.9182    | 149                                        | 50.082        | 0.9368(0.4133-2.1237)  |
| STATUS, POST GASTRIC STAPLING/BYPASS                     | 0                                       | 0          | 33                                         | 7.5262        | 0(0-Inf)               |
| STATUS, POST LAMINECTOMY                                 | 16                                      | 124.4779   | 474                                        | 158.6587      | 0.7846(0.4762-1.2927)  |
| STATUS, POST OPEN REDUCTION / INTERNAL FIXATION (ORIF)   | 26                                      | 279.5763   | 510                                        | 283.0881      | 0.9876(0.6652-1.4662)  |

| Description                                                                         | No. of Positive Cases with Disease Code | Case Rate* | No. of Positive Controls with Disease Code | Control Rate* | Relative Risk (95%CI)  |
|-------------------------------------------------------------------------------------|-----------------------------------------|------------|--------------------------------------------|---------------|------------------------|
| STATUS, POST PERCUTANEOUS MYOCARDIAL REVASCULARIZATION (PMR)                        | 0                                       | 0          | 1                                          | 0.3526        | 0(0-Inf)               |
| STATUS, POST REATTACHED EXTREMITY                                                   | 0                                       | 0          | 1                                          | 0.2729        | 0(0-Inf)               |
| STATUS, POST SURGERY, ELSEWHERE NEC                                                 | 9                                       | 69.2046    | 185                                        | 60.2029       | 1.1495(0.5874-2.2494)  |
| STATUS, POST TRANSMYOCARDIAL REVASCULARIZATION (TMR)                                | 0                                       | 0          | 1                                          | 0.2354        | 0(0-Inf)               |
| STATUS, POST-GASTRECTOMY (PARTIAL), NOS                                             | 6                                       | 50.9222    | 86                                         | 33.2172       | 1.533(0.6677-3.5195)   |
| STATUS, POST-GASTRECTOMY (TOTAL)                                                    | 1                                       | 10.247     | 13                                         | 6.7775        | 1.5119(0.1961-11.6546) |
| STATUS, POST-OPERATIVE HEART SURGERY, CONGENITAL                                    | 0                                       | 0          | 34                                         | 8.6945        | 0(0-Inf)               |
| STATUS, POST-OPERATIVE HEART SURGERY, NEC                                           | 6                                       | 57.2192    | 226                                        | 105.2008      | 0.5439(0.2415-1.225)   |
| STATUS, PROSTHESIS, AORTIC GRAFT                                                    | 5                                       | 53.95      | 83                                         | 45.8848       | 1.1758(0.4757-2.9063)  |
| STATUS, PROSTHESIS, AORTIC HEART VALVE                                              | 10                                      | 109.6969   | 266                                        | 150.534       | 0.7287(0.3871-1.3717)  |
| STATUS, PROSTHESIS, BREAST                                                          | 3                                       | 52.5882    | 113                                        | 50.8751       | 1.0337(0.3275-3.2624)  |
| STATUS, PROSTHESIS, EAR                                                             | 0                                       | 0          | 1                                          | 0.2729        | 0(0-Inf)               |
| STATUS, PROSTHESIS, EYE (ARTIFICIAL)                                                | 1                                       | 10.8426    | 9                                          | 5.0484        | 2.1477(0.2695-17.1172) |
| STATUS, PROSTHESIS, EYE FITTING                                                     | 1                                       | 6.9416     | 11                                         | 2.7898        | 2.4882(0.3173-19.5093) |
| STATUS, PROSTHESIS, HEART VALVE, NOS                                                | 2                                       | 22.0177    | 67                                         | 38.3147       | 0.5747(0.1405-2.3502)  |
| STATUS, PROSTHESIS, JOINT, SEE ALSO STATUS, ARTHROPLASTY                            | 0                                       | 0          | 1                                          | 0.4048        | 0(0-Inf)               |
| STATUS, PROSTHESIS, LARYNX                                                          | 0                                       | 0          | 3                                          | 1.5107        | 0(0-Inf)               |
| STATUS, PROSTHESIS, MITRAL HEART VALVE                                              | 5                                       | 39.8119    | 108                                        | 37.5092       | 1.0614(0.4318-2.6091)  |
| STATUS, PROSTHESIS, PENILE                                                          | 1                                       | 17.6883    | 46                                         | 39.6419       | 0.4462(0.0614-3.242)   |
| STATUS, PROSTHESIS, TRICUSPID HEART VALVE                                           | 0                                       | 0          | 10                                         | 3.1114        | 0(0-Inf)               |
| STATUS, PUMP (THERAPEUTIC), NEC/NOS                                                 | 1                                       | 7.3806     | 3                                          | 0.9144        | 8.0712(0.812-80.2303)  |
| STATUS, REPLACEMENT, HEART                                                          | 0                                       | 0          | 1                                          | 0.3526        | 0(0-Inf)               |
| STATUS, REPLACEMENT, LIMB(S)                                                        | 0                                       | 0          | 4                                          | 3.5536        | 0(0-Inf)               |
| STATUS, ROUX-EN-Y (BILIARY)                                                         | 0                                       | 0          | 3                                          | 1.5755        | 0(0-Inf)               |
| STATUS, ROUX-EN-Y (G.I.)                                                            | 0                                       | 0          | 22                                         | 6.2455        | 0(0-Inf)               |
| STATUS, SHUNT, ARTERIAL VENOUS, FOR DIALYSIS                                        | 0                                       | 0          | 4                                          | 2.9185        | 0(0-Inf)               |
| STATUS, SHUNT, VASCULAR (MESOCAVAL) (SPLENORENAL) (TIPS)                            | 0                                       | 0          | 10                                         | 2.6503        | 0(0-Inf)               |
| STATUS, SHUNT, VENTRICULAR, FOR DRAINAGE                                            | 1                                       | 8.0477     | 27                                         | 9.5893        | 0.8392(0.1135-6.2079)  |
| STATUS, SKIN GRAFT                                                                  | 3                                       | 28.6085    | 81                                         | 37.7081       | 0.7587(0.2391-2.4076)  |
| STATUS, STREPTOKINASE CORONARY INFUSION (T-PA)(TIMI)                                | 1                                       | 6.9317     | 82                                         | 22.1966       | 0.3123(0.0434-2.2473)  |
| STATUS, STREPTOKINASE INTRAVENOUS / INTRA-ARTERIAL INFUSION (T-PA)(TIMI)            | 0                                       | 0          | 15                                         | 4.036         | 0(0-Inf)               |
| STATUS, STREPTOKINASE PULMONARY ARTERY INFUSION (T-PA)(TIMI)                        | 0                                       | 0          | 1                                          | 0.234         | 0(0-Inf)               |
| STATUS, TENDON GRAFT                                                                | 0                                       | 0          | 20                                         | 4.902         | 0(0-Inf)               |
| STATUS, THERAPEUTIC DEVICE, NEC (STENT/TUBE/DRAIN/ETC)/ TISSUE EXPANDER/FILLER PORT | 7                                       | 72.8898    | 130                                        | 68.6939       | 1.0611(0.4949-2.2748)  |

| Description                                                | No. of Positive Cases with Disease Code | Case Rate* | No. of Positive Controls with Disease Code | Control Rate* | Relative Risk (95%CI)  |
|------------------------------------------------------------|-----------------------------------------|------------|--------------------------------------------|---------------|------------------------|
| STATUS, THORACOSTOMY (ANY CHEST DRAINAGE TUBE)             | 1                                       | 9.0284     | 10                                         | 4.3052        | 2.0971(0.2657-16.5546) |
| STATUS, THYROID, INDETERMINATE                             | 3                                       | 21.2063    | 98                                         | 26.3883       | 0.8036(0.254-2.5426)   |
| STATUS, TRACHEOSTOMY                                       | 2                                       | 17.626     | 49                                         | 20.2957       | 0.8685(0.2105-3.583)   |
| STATUS, TRANSLUMINAL CORONARY ANGIOPLASTY--PTCA            | 36                                      | 311.1515   | 1197                                       | 480.5908      | 0.6474(0.4645-0.9025)  |
| STATUS, TRANSPLANT, BONE MARROW                            | 0                                       | 0          | 6                                          | 1.7844        | 0(0-Inf)               |
| STATUS, TRANSPLANT, CORNEA                                 | 2                                       | 15.9693    | 46                                         | 16.0666       | 0.9939(0.2402-4.1129)  |
| STATUS, TRANSPLANT, HEART                                  | 0                                       | 0          | 8                                          | 2.0704        | 0(0-Inf)               |
| STATUS, TRANSPLANT, HEART VALVE                            | 1                                       | 17.3671    | 5                                          | 5.2869        | 3.2849(0.3799-28.4042) |
| STATUS, TRANSPLANT, KIDNEY                                 | 5                                       | 34.6501    | 38                                         | 9.8007        | 3.5355(1.3815-9.0477)  |
| STATUS, TRANSPLANT, LIVER                                  | 2                                       | 13.9386    | 10                                         | 2.5676        | 5.4286(1.1668-25.2562) |
| STATUS, TRANSPLANT, LUNG                                   | 0                                       | 0          | 3                                          | 0.7174        | 0(0-Inf)               |
| STATUS, TRANSPLANT, ORGAN, NEC                             | 0                                       | 0          | 5                                          | 1.4861        | 0(0-Inf)               |
| STATUS, TRANSPLANT, PANCREAS                               | 0                                       | 0          | 1                                          | 0.4048        | 0(0-Inf)               |
| STATUS, TRANSPLANT, PERIPHERAL BLOOD STEM                  | 0                                       | 0          | 10                                         | 2.5446        | 0(0-Inf)               |
| STATUS, URETEROSTOMY                                       | 2                                       | 14.164     | 14                                         | 3.8065        | 3.721(0.8336-16.6098)  |
| STATUS, VASCULAR GRAFTS                                    | 12                                      | 117.3378   | 224                                        | 107.7283      | 1.0892(0.6084-1.9501)  |
| STEATOCYSTOMA, MULTIPLEX                                   | 0                                       | 0          | 4                                          | 1.1678        | 0(0-Inf)               |
| STEATOCYSTOMA, NOS                                         | 0                                       | 0          | 8                                          | 2.0619        | 0(0-Inf)               |
| STEATOHEPATITIS                                            | 1                                       | 7.0163     | 123                                        | 32.8678       | 0.2135(0.0298-1.5287)  |
| STEATORRHEA, IDIOPATHIC                                    | 0                                       | 0          | 1                                          | 0.8878        | 0(0-Inf)               |
| STEATORRHEA, NOS                                           | 1                                       | 7.2261     | 16                                         | 4.6083        | 1.568(0.2061-11.9328)  |
| STEATOSIS (METABOLIC DISEASE #) SEE ALSO FATTY/FAT BY SITE | 0                                       | 0          | 6                                          | 1.4004        | 0(0-Inf)               |
| STEINSTRASSE                                               | 0                                       | 0          | 1                                          | 0.3526        | 0(0-Inf)               |
| STENOSIS, AMPULLA OF VATER                                 | 0                                       | 0          | 3                                          | 2.0949        | 0(0-Inf)               |
| STENOSIS, ANUS, NOS                                        | 1                                       | 8.4193     | 38                                         | 14.5913       | 0.577(0.079-4.2168)    |
| STENOSIS, AORTA (CONGENITAL #)                             | 6                                       | 94.3023    | 134                                        | 126.0807      | 0.748(0.3297-1.6968)   |
| STENOSIS, AORTA, ARTERIOSCLEROTIC                          | 0                                       | 0          | 2                                          | 0.4854        | 0(0-Inf)               |
| STENOSIS, AORTA, CALCIFIED                                 | 0                                       | 0          | 2                                          | 2.9851        | 0(0-Inf)               |
| STENOSIS, AORTIC CALCIFIC                                  | 2                                       | 21.7805    | 50                                         | 28.3883       | 0.7672(0.1861-3.1626)  |
| STENOSIS, AORTIC NOS--AS                                   | 22                                      | 275.8876   | 581                                        | 398.1291      | 0.693(0.4524-1.0615)   |
| STENOSIS, AORTIC, CALCIFIC, CLASS 1                        | 0                                       | 0          | 1                                          | 0.8877        | 0(0-Inf)               |
| STENOSIS, AORTIC, CALCIFIC, CLASS 2                        | 0                                       | 0          | 1                                          | 0.3526        | 0(0-Inf)               |
| STENOSIS, AORTIC, CALCIFIC, CLASS 3                        | 1                                       | 7.4806     | 10                                         | 3.1445        | 2.3789(0.3007-18.8215) |
| STENOSIS, AORTIC, CALCIFIC, CLASS 4                        | 0                                       | 0          | 3                                          | 0.9611        | 0(0-Inf)               |
| STENOSIS, AORTIC, CALCIFIC, MILD                           | 2                                       | 23.4373    | 24                                         | 15.0851       | 1.5537(0.3652-6.609)   |
| STENOSIS, AORTIC, CALCIFIC, MODERATE                       | 1                                       | 15.7186    | 18                                         | 16.8017       | 0.9355(0.1244-7.0345)  |
| STENOSIS, AORTIC, CALCIFIC, SEVERE                         | 2                                       | 28.7212    | 23                                         | 18.9445       | 1.5161(0.3559-6.4589)  |
| STENOSIS, AORTIC, CLASS 1                                  | 0                                       | 0          | 7                                          | 1.9433        | 0(0-Inf)               |
| STENOSIS, AORTIC, CLASS 2                                  | 0                                       | 0          | 3                                          | 0.9166        | 0(0-Inf)               |

| Description                                                                  | No. of Positive Cases with Disease Code | Case Rate* | No. of Positive Controls with Disease Code | Control Rate* | Relative Risk (95%CI)  |
|------------------------------------------------------------------------------|-----------------------------------------|------------|--------------------------------------------|---------------|------------------------|
| STENOSIS, AORTIC, CLASS 3                                                    | 0                                       | 0          | 13                                         | 4.8825        | 0(0-Inf)               |
| STENOSIS, AORTIC, CLASS 4                                                    | 0                                       | 0          | 6                                          | 1.9225        | 0(0-Inf)               |
| STENOSIS, AORTIC, CONGENITAL                                                 | 0                                       | 0          | 2                                          | 0.9503        | 0(0-Inf)               |
| STENOSIS, AORTIC, MILD                                                       | 14                                      | 156.0448   | 292                                        | 170.2476      | 0.9166(0.5354-1.569)   |
| STENOSIS, AORTIC, MODERATE                                                   | 11                                      | 150.0556   | 147                                        | 113.3167      | 1.3242(0.7163-2.4481)  |
| STENOSIS, AORTIC, RHEUMATIC                                                  | 1                                       | 7.2562     | 14                                         | 3.3017        | 2.1977(0.2857-16.904)  |
| STENOSIS, AORTIC, SEVERE                                                     | 5                                       | 75.2135    | 192                                        | 170.1688      | 0.442(0.1817-1.075)    |
| STENOSIS, AORTIC, SUBVALVULAR, HYPERTROPHIC                                  | 0                                       | 0          | 2                                          | 0.5908        | 0(0-Inf)               |
| STENOSIS, AQUEDUCT OF SYLVIVUS, NOS                                          | 0                                       | 0          | 4                                          | 1.5029        | 0(0-Inf)               |
| STENOSIS, ARTERY, NEC                                                        | 0                                       | 0          | 3                                          | 1.2104        | 0(0-Inf)               |
| STENOSIS, ARTERY, NOS                                                        | 0                                       | 0          | 2                                          | 1.776         | 0(0-Inf)               |
| STENOSIS, AUDITORY CANAL                                                     | 0                                       | 0          | 1                                          | 0.8536        | 0(0-Inf)               |
| STENOSIS, BASILAR ARTERY                                                     | 0                                       | 0          | 26                                         | 14.1395       | 0(0-Inf)               |
| STENOSIS, BILE DUCT, NEC                                                     | 1                                       | 7.881      | 9                                          | 3.0707        | 2.5665(0.3202-20.5723) |
| STENOSIS, BLADDER NECK                                                       | 0                                       | 0          | 7                                          | 7.2178        | 0(0-Inf)               |
| STENOSIS, BRAIN                                                              | 0                                       | 0          | 4                                          | 2.3014        | 0(0-Inf)               |
| STENOSIS, BRONCHUS                                                           | 0                                       | 0          | 3                                          | 0.9165        | 0(0-Inf)               |
| STENOSIS, CARDIA, NOS                                                        | 0                                       | 0          | 3                                          | 0.9165        | 0(0-Inf)               |
| STENOSIS, CAROTID ARTERY                                                     | 14                                      | 137.0746   | 610                                        | 297.0894      | 0.4614(0.2714-0.7842)  |
| STENOSIS, CAROTID ARTERY, BILATERAL                                          | 2                                       | 22.5311    | 107                                        | 63.5075       | 0.3548(0.0875-1.4389)  |
| STENOSIS, CELIAC ARTERY                                                      | 0                                       | 0          | 12                                         | 4.8902        | 0(0-Inf)               |
| STENOSIS, CEREBRAL ARTERY, MIDDLE                                            | 1                                       | 7.6415     | 7                                          | 2.2557        | 3.3876(0.4092-28.042)  |
| STENOSIS, CEREBRAL ARTERY, NOS                                               | 0                                       | 0          | 9                                          | 4.5349        | 0(0-Inf)               |
| STENOSIS, CERVICAL (FEMALE GENITAL #)                                        | 2                                       | 14.3499    | 86                                         | 19.0162       | 0.7546(0.1851-3.0762)  |
| STENOSIS, COMMON BILE DUCT                                                   | 0                                       | 0          | 3                                          | 3.9308        | 0(0-Inf)               |
| STENOSIS, COMMON HEPATIC DUCT                                                | 0                                       | 0          | 4                                          | 4.78          | 0(0-Inf)               |
| STENOSIS, CORONARY ARTERY                                                    | 4                                       | 35.348     | 121                                        | 50.8177       | 0.6956(0.2565-1.8866)  |
| STENOSIS, DUODENUM, NOS                                                      | 2                                       | 16.1426    | 17                                         | 6.0535        | 2.6666(0.6098-11.6612) |
| STENOSIS, ENDOCERVICAL                                                       | 0                                       | 0          | 1                                          | 0.234         | 0(0-Inf)               |
| STENOSIS, ESOPHAGUS, NOS                                                     | 2                                       | 14.6816    | 15                                         | 4.5025        | 3.2608(0.7367-14.4325) |
| STENOSIS, FALLOPIAN TUBE                                                     | 0                                       | 0          | 1                                          | 0.398         | 0(0-Inf)               |
| STENOSIS, FEMORAL ARTERY (ATHEROMATOUS)                                      | 0                                       | 0          | 22                                         | 8.2652        | 0(0-Inf)               |
| STENOSIS, GALLBLADDER                                                        | 0                                       | 0          | 2                                          | 0.7896        | 0(0-Inf)               |
| STENOSIS, GLOTTIS                                                            | 0                                       | 0          | 3                                          | 0.7063        | 0(0-Inf)               |
| STENOSIS, HEART VALVE PROSTHESIS, CODE ALSO STATUS #                         | 1                                       | 11.7167    | 9                                          | 5.6261        | 2.0826(0.2614-16.5944) |
| STENOSIS, HEPATIC ARTERY                                                     | 0                                       | 0          | 2                                          | 0.432         | 0(0-Inf)               |
| STENOSIS, HOMOGRAFT (HEART VALVE), CODE ALSO STENOSIS, VALVE, BY SITE STATED | 0                                       | 0          | 1                                          | 0.4048        | 0(0-Inf)               |
| STENOSIS, ILIAC ARTERY                                                       | 0                                       | 0          | 17                                         | 5.0154        | 0(0-Inf)               |
| STENOSIS, INTESTINE, NOS                                                     | 0                                       | 0          | 7                                          | 2.3463        | 0(0-Inf)               |

| Description                                          | No. of Positive Cases with Disease Code | Case Rate* | No. of Positive Controls with Disease Code | Control Rate* | Relative Risk (95%CI)    |
|------------------------------------------------------|-----------------------------------------|------------|--------------------------------------------|---------------|--------------------------|
| STENOSIS, INTROITAL                                  | 0                                       | 0          | 8                                          | 2.3652        | 0(0-Inf)                 |
| STENOSIS, LACRIMAL DUCT                              | 0                                       | 0          | 4                                          | 1.2656        | 0(0-Inf)                 |
| STENOSIS, LARYNX, NOS                                | 0                                       | 0          | 1                                          | 0.4049        | 0(0-Inf)                 |
| STENOSIS, MEATAL                                     | 1                                       | 8.1333     | 44                                         | 16.3638       | 0.497(0.0683-3.6167)     |
| STENOSIS, MITRAL, CLASS 1                            | 0                                       | 0          | 2                                          | 0.432         | 0(0-Inf)                 |
| STENOSIS, MITRAL, CLASS 2                            | 0                                       | 0          | 6                                          | 1.7336        | 0(0-Inf)                 |
| STENOSIS, MITRAL, CLASS 3                            | 0                                       | 0          | 3                                          | 1.0185        | 0(0-Inf)                 |
| STENOSIS, MITRAL, MILD                               | 0                                       | 0          | 34                                         | 13.5977       | 0(0-Inf)                 |
| STENOSIS, MITRAL, MINIMAL                            | 0                                       | 0          | 2                                          | 1.0785        | 0(0-Inf)                 |
| STENOSIS, MITRAL, MODERATE                           | 1                                       | 7.4518     | 21                                         | 6.3918        | 1.1658(0.1557-8.7321)    |
| STENOSIS, MITRAL, RHEUMATIC, CLASS 1                 | 0                                       | 0          | 2                                          | 0.5838        | 0(0-Inf)                 |
| STENOSIS, MITRAL, RHEUMATIC, CLASS 2                 | 1                                       | 15.7839    | 2                                          | 0.7649        | 20.6348(1.8067-235.6727) |
| STENOSIS, MITRAL, RHEUMATIC, CLASS 3                 | 0                                       | 0          | 5                                          | 1.1528        | 0(0-Inf)                 |
| STENOSIS, MITRAL, RHEUMATIC, CLASS 4                 | 0                                       | 0          | 1                                          | 0.398         | 0(0-Inf)                 |
| STENOSIS, MITRAL, RHEUMATIC, MILD                    | 0                                       | 0          | 10                                         | 2.3581        | 0(0-Inf)                 |
| STENOSIS, MITRAL, RHEUMATIC, MODERATE                | 0                                       | 0          | 11                                         | 2.976         | 0(0-Inf)                 |
| STENOSIS, MITRAL, RHEUMATIC, NOS                     | 1                                       | 7.3408     | 22                                         | 4.9492        | 1.4832(0.1983-11.0949)   |
| STENOSIS, MITRAL, RHEUMATIC, SEVERE                  | 1                                       | 7.1316     | 8                                          | 2.2009        | 3.2403(0.3977-26.3977)   |
| STENOSIS, MITRAL, SEVERE                             | 1                                       | 14.9692    | 10                                         | 6.2051        | 2.4124(0.304-19.1418)    |
| STENOSIS, MITRAL--MS                                 | 5                                       | 38.782     | 79                                         | 26.02         | 1.4905(0.6012-3.6953)    |
| STENOSIS, NARES, NOS                                 | 0                                       | 0          | 1                                          | 0.2729        | 0(0-Inf)                 |
| STENOSIS, PULMONARY ARTERY, CONGENITAL               | 0                                       | 0          | 2                                          | 0.8724        | 0(0-Inf)                 |
| STENOSIS, PULMONARY VALVE, CONGENITAL                | 0                                       | 0          | 2                                          | 0.7053        | 0(0-Inf)                 |
| STENOSIS, PULMONARY VALVE, NOS                       | 0                                       | 0          | 6                                          | 1.5423        | 0(0-Inf)                 |
| STENOSIS, PULMONARY, NOS                             | 0                                       | 0          | 8                                          | 3.6809        | 0(0-Inf)                 |
| STENOSIS, PYLORUS                                    | 0                                       | 0          | 29                                         | 8.6687        | 0(0-Inf)                 |
| STENOSIS, RECTAL                                     | 1                                       | 10.7406    | 12                                         | 6.6485        | 1.6155(0.2084-12.5227)   |
| STENOSIS, RENAL ARTERY                               | 5                                       | 46.9884    | 171                                        | 77.8209       | 0.6038(0.2477-1.4716)    |
| STENOSIS, RENAL ARTERY, ATHEROMATOUS                 | 1                                       | 7.6436     | 7                                          | 2.256         | 3.3881(0.4092-28.0506)   |
| STENOSIS, SPHINCTER OF ODDI                          | 0                                       | 0          | 1                                          | 0.398         | 0(0-Inf)                 |
| STENOSIS, SPINAL (CORD)                              | 37                                      | 370.4059   | 900                                        | 437.5071      | 0.8466(0.609-1.1771)     |
| STENOSIS, SUBAORTIC                                  | 0                                       | 0          | 4                                          | 1.363         | 0(0-Inf)                 |
| STENOSIS, SUBAORTIC, HYPERTROPHIC (IDIOPATHIC)--IHSS | 1                                       | 7.5927     | 14                                         | 4.443         | 1.7089(0.2223-13.1367)   |
| STENOSIS, SUBCLAVIAN ARTERY                          | 3                                       | 23.7748    | 70                                         | 24.0868       | 0.987(0.3097-3.1456)     |
| STENOSIS, SUBGLOTTIC                                 | 0                                       | 0          | 6                                          | 1.4227        | 0(0-Inf)                 |
| STENOSIS, SUBVALVULAR, AORTIC, CONGENITAL            | 0                                       | 0          | 2                                          | 1.1972        | 0(0-Inf)                 |
| STENOSIS, TEAR DUCT                                  | 0                                       | 0          | 1                                          | 0.234         | 0(0-Inf)                 |
| STENOSIS, TEMPORAL ARTERY                            | 0                                       | 0          | 1                                          | 0.8528        | 0(0-Inf)                 |
| STENOSIS, TRACHEA, NOS                               | 0                                       | 0          | 6                                          | 2.4453        | 0(0-Inf)                 |
| STENOSIS, URETER                                     | 0                                       | 0          | 5                                          | 2.7728        | 0(0-Inf)                 |

| Description                                               | No. of Positive Cases with Disease Code | Case Rate* | No. of Positive Controls with Disease Code | Control Rate* | Relative Risk (95%CI)  |
|-----------------------------------------------------------|-----------------------------------------|------------|--------------------------------------------|---------------|------------------------|
| STENOSIS, URETHRAL                                        | 4                                       | 31.1131    | 50                                         | 16.9457       | 1.8361(0.6599-5.1082)  |
| STENOSIS, VAGINA                                          | 1                                       | 14.0622    | 19                                         | 9.99          | 1.4076(0.1867-10.6126) |
| STENOSIS, VASCULAR GRAFT OR SHUNT                         | 0                                       | 0          | 26                                         | 12.1247       | 0(0-Inf)               |
| STENOSIS, VENA CAVA, NOS                                  | 0                                       | 0          | 1                                          | 1.9067        | 0(0-Inf)               |
| STENOSIS, VERTEBRAL ARTERY                                | 3                                       | 26.1455    | 32                                         | 13.0301       | 2.0065(0.6109-6.5904)  |
| STERILITY, MALE (IF DUE TO STERILIZATION SEE RESTORATION) | 0                                       | 0          | 1                                          | 0.2729        | 0(0-Inf)               |
| STERILIZATION, NOS                                        | 0                                       | 0          | 4                                          | 2.7998        | 0(0-Inf)               |
| STERILIZATION, VOLUNTARY                                  | 11                                      | 356.3941   | 645                                        | 408.2805      | 0.8729(0.4808-1.5849)  |
| STICKY EYE                                                | 0                                       | 0          | 1                                          | 1.9093        | 0(0-Inf)               |
| STIFFNESS, ANKLE                                          | 0                                       | 0          | 10                                         | 2.8237        | 0(0-Inf)               |
| STIFFNESS, BACK                                           | 0                                       | 0          | 20                                         | 5.7916        | 0(0-Inf)               |
| STIFFNESS, FINGERS                                        | 1                                       | 7.0374     | 26                                         | 7.2237        | 0.9742(0.1315-7.2182)  |
| STIFFNESS, JOINT, NOS                                     | 4                                       | 29.1496    | 124                                        | 36.2689       | 0.8037(0.2962-2.1808)  |
| STIFFNESS, KNEE                                           | 2                                       | 15.1192    | 35                                         | 11.0602       | 1.367(0.3268-5.7174)   |
| STIFFNESS, MUSCLE                                         | 3                                       | 25.7135    | 54                                         | 21.2115       | 1.2122(0.3776-3.8922)  |
| STIFFNESS, NECK                                           | 3                                       | 22.1611    | 92                                         | 27.7242       | 0.7993(0.2524-2.5314)  |
| STIFFNESS, NECK, MECHANICAL                               | 0                                       | 0          | 1                                          | 0.4751        | 0(0-Inf)               |
| STIFFNESS, SHOULDER                                       | 1                                       | 7.5111     | 32                                         | 9.967         | 0.7536(0.1025-5.5414)  |
| STOMA (SEE ALSO STATUS)                                   | 1                                       | 8.8434     | 3                                          | 1.2598        | 7.0195(0.7119-69.2104) |
| STOMACHACHE                                               | 1                                       | 7.93       | 10                                         | 3.4461        | 2.3011(0.2906-18.2241) |
| STOMATITIS, ANGULAR                                       | 0                                       | 0          | 7                                          | 1.8253        | 0(0-Inf)               |
| STOMATITIS, APHTHOUS                                      | 7                                       | 63.2064    | 99                                         | 25.0775       | 2.5204(1.166-5.448)    |
| STOMATITIS, HERPETIC                                      | 2                                       | 13.9796    | 20                                         | 4.8474        | 2.8839(0.6669-12.4702) |
| STOMATITIS, MONILIAL                                      | 0                                       | 0          | 4                                          | 1.0354        | 0(0-Inf)               |
| STOMATITIS, NOS                                           | 3                                       | 22.5584    | 83                                         | 25.7959       | 0.8745(0.2755-2.7758)  |
| STOMATITIS, ULCERATING                                    | 0                                       | 0          | 1                                          | 0.234         | 0(0-Inf)               |
| STOMATITIS, VIRAL                                         | 0                                       | 0          | 15                                         | 4.0195        | 0(0-Inf)               |
| STONE, COMMON DUCT                                        | 3                                       | 25.3868    | 82                                         | 31.6044       | 0.8033(0.2531-2.5493)  |
| STONE, KIDNEY, SEE ALSO CALCULUS, RENAL                   | 6                                       | 43.8055    | 220                                        | 67.3253       | 0.6507(0.2887-1.4662)  |
| STONE, PROSTATIC                                          | 0                                       | 0          | 4                                          | 1.72          | 0(0-Inf)               |
| STONE, RENAL, SEE ALSO CALCULUS, RENAL                    | 6                                       | 42.5046    | 217                                        | 61.7013       | 0.6889(0.3056-1.5528)  |
| STONE, URETERAL                                           | 7                                       | 50.2693    | 184                                        | 55.2406       | 0.91(0.4271-1.939)     |
| STONE, URINARY, SEE ALSO CALCULUS, URINARY                | 0                                       | 0          | 10                                         | 2.9312        | 0(0-Inf)               |
| STRABISMUS, ALTERNATING                                   | 0                                       | 0          | 1                                          | 0.2729        | 0(0-Inf)               |
| STRABISMUS, CONGENITAL                                    | 0                                       | 0          | 2                                          | 0.5911        | 0(0-Inf)               |
| STRABISMUS, CONGENITAL, DIVERGENT                         | 0                                       | 0          | 1                                          | 0.8893        | 0(0-Inf)               |
| STRABISMUS, CONVERGENCE, SEE ALSO ESOPHORIA               | 0                                       | 0          | 3                                          | 0.741         | 0(0-Inf)               |
| STRABISMUS, DIVERGENT, SEE ALSO EXOTROPIA                 | 1                                       | 16.1664    | 10                                         | 3.6632        | 4.4132(0.5582-34.8919) |
| STRABISMUS, INTERMITTENT                                  | 0                                       | 0          | 1                                          | 0.8532        | 0(0-Inf)               |
| STRABISMUS, MECHANICAL, NOS                               | 0                                       | 0          | 1                                          | 0.3526        | 0(0-Inf)               |

| Description                                                   | No. of Positive Cases with Disease Code | Case Rate* | No. of Positive Controls with Disease Code | Control Rate* | Relative Risk (95%CI)    |
|---------------------------------------------------------------|-----------------------------------------|------------|--------------------------------------------|---------------|--------------------------|
| STRABISMUS, NOS                                               | 0                                       | 0          | 48                                         | 13.9118       | 0(0-Inf)                 |
| STRABISMUS, POST-OPERATIVE                                    | 0                                       | 0          | 2                                          | 0.7896        | 0(0-Inf)                 |
| STRABISMUS, SPECIFIED TYPE, NOS                               | 0                                       | 0          | 1                                          | 0.4048        | 0(0-Inf)                 |
| STRAIN, EYE                                                   | 0                                       | 0          | 12                                         | 3.0048        | 0(0-Inf)                 |
| STRAIN, NOS, SEE ALSO SPRAIN, BY SITE                         | 19                                      | 133.6253   | 658                                        | 171.2714      | 0.7802(0.4939-1.2324)    |
| STRAIN, VENTRICULAR                                           | 0                                       | 0          | 1                                          | 0.4049        | 0(0-Inf)                 |
| STREAK, ANGIOID                                               | 0                                       | 0          | 5                                          | 1.2653        | 0(0-Inf)                 |
| STRESS, NOS                                                   | 23                                      | 166.4109   | 928                                        | 261.9677      | 0.6352(0.4196-0.9616)    |
| STRESS, POST TRAUMATIC                                        | 0                                       | 0          | 3                                          | 0.9772        | 0(0-Inf)                 |
| STRETCHING INJURY NERVE-CODE ALSO INJURY NERVE BY SITE STATED | 0                                       | 0          | 2                                          | 0.5709        | 0(0-Inf)                 |
| STRIA HAAB'S                                                  | 0                                       | 0          | 1                                          | 0.4048        | 0(0-Inf)                 |
| STRICTURE, ANAL                                               | 2                                       | 15.0471    | 15                                         | 4.6976        | 3.2031(0.7238-14.176)    |
| STRICTURE, AUDITORY CANAL, EXTERNAL, ACQUIRED                 | 1                                       | 6.9566     | 3                                          | 0.6762        | 10.2882(1.0239-103.3735) |
| STRICTURE, BRONCHUS                                           | 1                                       | 7.0679     | 9                                          | 2.4215        | 2.9188(0.3638-23.4214)   |
| STRICTURE, CERVIX, NOS                                        | 1                                       | 7.7783     | 0                                          | 0             | 17339444770.5909(0-Inf)  |
| STRICTURE, COLON                                              | 1                                       | 7.7225     | 21                                         | 6.8968        | 1.1197(0.1496-8.3831)    |
| STRICTURE, COMMON DUCT                                        | 0                                       | 0          | 11                                         | 3.6853        | 0(0-Inf)                 |
| STRICTURE, ESOPHAGEAL, BENIGN                                 | 0                                       | 0          | 9                                          | 3.5856        | 0(0-Inf)                 |
| STRICTURE, ESOPHAGEAL, LYE BURN                               | 0                                       | 0          | 1                                          | 0.234         | 0(0-Inf)                 |
| STRICTURE, ESOPHAGEAL, NOS                                    | 9                                       | 73.3994    | 324                                        | 118.7555      | 0.6181(0.3183-1.2001)    |
| STRICTURE, ESOPHAGEAL, POST-RADIATION                         | 0                                       | 0          | 3                                          | 0.8114        | 0(0-Inf)                 |
| STRICTURE, ESOPHAGOGASTRIC JUNCTION                           | 4                                       | 34.693     | 72                                         | 28.9414       | 1.1987(0.4365-3.2922)    |
| STRICTURE, FOSSA NAVICULARIS (FEMALE #)                       | 0                                       | 0          | 3                                          | 1.9014        | 0(0-Inf)                 |
| STRICTURE, LACRIMAL APPARATUS, DUCT                           | 0                                       | 0          | 1                                          | 0.4051        | 0(0-Inf)                 |
| STRICTURE, MEATAL                                             | 0                                       | 0          | 9                                          | 5.2842        | 0(0-Inf)                 |
| STRICTURE, MITRAL VALVE, SEE ALSO STENOSIS                    | 0                                       | 0          | 1                                          | 0.8275        | 0(0-Inf)                 |
| STRICTURE, NASOPHARYNX                                        | 0                                       | 0          | 1                                          | 0.2354        | 0(0-Inf)                 |
| STRICTURE, NOSE                                               | 1                                       | 10.1238    | 0                                          | 0             | 14223010268.8795(0-Inf)  |
| STRICTURE, PEPTIC                                             | 1                                       | 9.5847     | 51                                         | 23.9567       | 0.4001(0.0552-2.9017)    |
| STRICTURE, PUNCTUM LACRIMALE                                  | 2                                       | 14.601     | 16                                         | 4.7314        | 3.086(0.7014-13.5785)    |
| STRICTURE, PYLORUS                                            | 1                                       | 11.9863    | 5                                          | 3.3001        | 3.6321(0.4175-31.5967)   |
| STRICTURE, RECTAL                                             | 0                                       | 0          | 11                                         | 3.5053        | 0(0-Inf)                 |
| STRICTURE, SIGMOID                                            | 3                                       | 26.1291    | 23                                         | 9.1931        | 2.8422(0.8458-9.551)     |
| STRICTURE, SMALL INTESTINE                                    | 1                                       | 7.7845     | 14                                         | 4.7025        | 1.6554(0.2156-12.7088)   |
| STRICTURE, URETERAL                                           | 1                                       | 8.6863     | 23                                         | 9.3364        | 0.9304(0.125-6.9224)     |
| STRICTURE, URETEROVESICAL                                     | 0                                       | 0          | 1                                          | 0.888         | 0(0-Inf)                 |
| STRICTURE, URETHRAL                                           | 15                                      | 138.7085   | 257                                        | 114.0015      | 1.2167(0.722-2.0505)     |
| STRICTURE, URETHRAL, DUE TO INFECTION                         | 0                                       | 0          | 1                                          | 0.8877        | 0(0-Inf)                 |
| STRICTURE, URETHRAL, POST-TRAUMATIC                           | 0                                       | 0          | 1                                          | 1.036         | 0(0-Inf)                 |

| Description                                               | No. of Positive<br>Cases with<br>Disease Code | Case<br>Rate* | No. of Positive<br>Controls with<br>Disease Code | Control<br>Rate* | Relative Risk (95%CI)   |
|-----------------------------------------------------------|-----------------------------------------------|---------------|--------------------------------------------------|------------------|-------------------------|
| STRICTURE, URETHRAL, RECURRENT                            | 0                                             | 0             | 18                                               | 9.5265           | 0(0-Inf)                |
| STRICTURE, URINARY                                        | 0                                             | 0             | 4                                                | 3.5514           | 0(0-Inf)                |
| STRICTURE, VESICAL NECK                                   | 0                                             | 0             | 6                                                | 6.5315           | 0(0-Inf)                |
| STRIDOR, CAUSE SPECIFIED                                  | 0                                             | 0             | 1                                                | 0.8528           | 0(0-Inf)                |
| STRIDOR, NOS                                              | 1                                             | 8.0547        | 12                                               | 4.2674           | 1.8875(0.2425-14.6899)  |
| STROKE, HEAT                                              | 0                                             | 0             | 2                                                | 0.5908           | 0(0-Inf)                |
| STROKE, NOS - SEE ALSO INFARCTION                         | 28                                            | 383.9265      | 600                                              | 471.9842         | 0.8134(0.5564-1.1891)   |
| STROKE, OLD, NOS - SEE ALSO INFARCTION                    | 34                                            | 435.6163      | 579                                              | 410.9293         | 1.0601(0.7494-1.4995)   |
| STROKE, RESIDUAL                                          | 22                                            | 297.0752      | 319                                              | 244.5438         | 1.2148(0.7877-1.8735)   |
| STROKE, WITH PARALYSIS                                    | 3                                             | 36.9533       | 22                                               | 14.9598          | 2.4702(0.7345-8.3078)   |
| STRONGYLOIDIASIS                                          | 0                                             | 0             | 2                                                | 0.5458           | 0(0-Inf)                |
| STRUMA, OVARIUM, NOS                                      | 0                                             | 0             | 3                                                | 0.9639           | 0(0-Inf)                |
| STUMP, APPENDIX, INVERTED                                 | 0                                             | 0             | 8                                                | 2.0551           | 0(0-Inf)                |
| STUMP, CERVICAL                                           | 0                                             | 0             | 2                                                | 0.4709           | 0(0-Inf)                |
| STUMP, URETERAL                                           | 0                                             | 0             | 1                                                | 0.2729           | 0(0-Inf)                |
| STUNNED MYOCARDIUM                                        | 0                                             | 0             | 3                                                | 1.5755           | 0(0-Inf)                |
| STUPOR                                                    | 0                                             | 0             | 3                                                | 2.0482           | 0(0-Inf)                |
| STUTTERING                                                | 1                                             | 6.8733        | 9                                                | 2.5085           | 2.74(0.3436-21.8505)    |
| STY (SEE ALSO HORDEOLUM)                                  | 7                                             | 48.9707       | 209                                              | 54.5037          | 0.8985(0.4223-1.9118)   |
| SUBEPENDYMOMA, BENIGN (NOS), CODE ALSO BY SITE            | 0                                             | 0             | 1                                                | 0.8879           | 0(0-Inf)                |
| SUBINVOLUTION, UTERINE                                    | 1                                             | 45.2607       | 39                                               | 30.7729          | 1.4708(0.2017-10.7246)  |
| SUBINVOLUTION, UTERINE, GR 2                              | 0                                             | 0             | 1                                                | 0.234            | 0(0-Inf)                |
| SUBINVOLUTION, UTERINE, GR 3                              | 0                                             | 0             | 1                                                | 0.398            | 0(0-Inf)                |
| SUBINVOLUTION, UTERUS, PUERPERAL                          | 0                                             | 0             | 1                                                | 0.398            | 0(0-Inf)                |
| SUBLUXATION, LENS                                         | 0                                             | 0             | 3                                                | 1.576            | 0(0-Inf)                |
| SUBLUXATION, NOS, SEE ALSO DISLOCATION                    | 0                                             | 0             | 3                                                | 0.7175           | 0(0-Inf)                |
| SUBLUXATION, SPINE (CHRONIC), SEE ALSO DISLOCATION        | 1                                             | 8.2662        | 27                                               | 10.0749          | 0.8205(0.1109-6.0713)   |
| SUICIDE, GESTURE, CODE ALSO ADVERSE EFFECT DRUG IF STATED | 0                                             | 0             | 48                                               | 12.6972          | 0(0-Inf)                |
| SUICIDE, TENDENCY                                         | 1                                             | 8.1211        | 23                                               | 8.3532           | 0.9722(0.1306-7.2393)   |
| SUNBURN-CODE ALSO BURN BY SITE STATED                     | 3                                             | 22.7301       | 71                                               | 17.0685          | 1.3317(0.4178-4.2442)   |
| SUPER ERUPTED TOOTH                                       | 0                                             | 0             | 9                                                | 2.8826           | 0(0-Inf)                |
| SUPERFLUOUS HAIR                                          | 0                                             | 0             | 6                                                | 1.5318           | 0(0-Inf)                |
| SUPERNUMERARY, SPINAL VERTEBRA                            | 0                                             | 0             | 1                                                | 0.234            | 0(0-Inf)                |
| SUPERNUMERARY, TEETH                                      | 0                                             | 0             | 11                                               | 4.2658           | 0(0-Inf)                |
| SUPPRESSION, BINOCULAR VISION                             | 0                                             | 0             | 1                                                | 0.2354           | 0(0-Inf)                |
| SUPPRESSION, URINE                                        | 0                                             | 0             | 1                                                | 0.2354           | 0(0-Inf)                |
| SUPRAGLOTTITIS                                            | 2                                             | 22.9799       | 2                                                | 1.2155           | 18.905(2.5963-137.6565) |
| SUSPICIOUS, FOR CAP (PATH PROVEN MALIGNANCY PROSTATE)     | 11                                            | 215.2104      | 360                                              | 357.0645         | 0.6027(0.3305-1.099)    |
| SUSPICIOUS, PROSTATE (NO MALIGNANCY FOUND)                | 20                                            | 348.8506      | 529                                              | 443.8873         | 0.7859(0.5025-1.2291)   |



| Description                                                                        | No. of Positive Cases with Disease Code | Case Rate* | No. of Positive Controls with Disease Code | Control Rate* | Relative Risk (95%CI)  |
|------------------------------------------------------------------------------------|-----------------------------------------|------------|--------------------------------------------|---------------|------------------------|
| SWEATING, EXCESSIVE-SEE ALSO DEFECTIVE/ABNORMAL                                    | 6                                       | 53.4281    | 148                                        | 61.7028       | 0.8659(0.382-1.9627)   |
| SWEATING, NIGHT                                                                    | 3                                       | 25.3902    | 123                                        | 47.494        | 0.5346(0.1698-1.6836)  |
| SWELLING, ABDOMINAL                                                                | 1                                       | 10.4197    | 20                                         | 10.7665       | 0.9678(0.1292-7.2517)  |
| SWELLING, ANKLE-SEE ALSO EDEMA                                                     | 9                                       | 80.9077    | 311                                        | 133.1991      | 0.6074(0.3127-1.18)    |
| SWELLING, ANUS                                                                     | 0                                       | 0          | 3                                          | 0.8456        | 0(0-Inf)               |
| SWELLING, BREAST                                                                   | 0                                       | 0          | 14                                         | 3.8115        | 0(0-Inf)               |
| SWELLING, CHEEK (INTERNAL)                                                         | 0                                       | 0          | 15                                         | 4.6149        | 0(0-Inf)               |
| SWELLING, CHEST                                                                    | 1                                       | 6.9639     | 6                                          | 1.3888        | 5.0142(0.5882-42.7439) |
| SWELLING, CYCLIC                                                                   | 0                                       | 0          | 5                                          | 1.5444        | 0(0-Inf)               |
| SWELLING, EAR                                                                      | 0                                       | 0          | 9                                          | 2.1131        | 0(0-Inf)               |
| SWELLING, EXTREMITY, LOWER                                                         | 55                                      | 492.7775   | 1269                                       | 526.0025      | 0.9368(0.7147-1.2281)  |
| SWELLING, EXTREMITY, NOS                                                           | 0                                       | 0          | 7                                          | 1.8366        | 0(0-Inf)               |
| SWELLING, EXTREMITY, UPPER                                                         | 27                                      | 199.5545   | 581                                        | 171.0169      | 1.1669(0.7922-1.7187)  |
| SWELLING, EYE                                                                      | 1                                       | 8.249      | 19                                         | 7.0228        | 1.1746(0.1561-8.8388)  |
| SWELLING, EYELID                                                                   | 1                                       | 8.079      | 31                                         | 11.0401       | 0.7318(0.0994-5.3852)  |
| SWELLING, GENITAL ORGAN, FEMALE, NOS                                               | 0                                       | 0          | 7                                          | 2.8342        | 0(0-Inf)               |
| SWELLING, JOINT, NEC                                                               | 1                                       | 7.1114     | 51                                         | 12.3543       | 0.5756(0.0793-4.1784)  |
| SWELLING, MOUTH, STRUCTURE OF                                                      | 4                                       | 28.1909    | 54                                         | 14.3747       | 1.9611(0.7062-5.4458)  |
| SWELLING, MUSCLE                                                                   | 0                                       | 0          | 3                                          | 0.8019        | 0(0-Inf)               |
| SWELLING, NOSE OR SINUS                                                            | 1                                       | 6.957      | 12                                         | 2.8869        | 2.4098(0.3092-18.7846) |
| SWELLING, PAROTID                                                                  | 0                                       | 0          | 20                                         | 5.9649        | 0(0-Inf)               |
| SWELLING, PENIS                                                                    | 0                                       | 0          | 4                                          | 4.5984        | 0(0-Inf)               |
| SWELLING, PERIORBITAL, NOS                                                         | 0                                       | 0          | 17                                         | 5.1811        | 0(0-Inf)               |
| SWELLING, PERIORBITAL, TRAUMATIC                                                   | 0                                       | 0          | 2                                          | 0.4709        | 0(0-Inf)               |
| SWELLING, SCROTUM                                                                  | 0                                       | 0          | 19                                         | 28.8141       | 0(0-Inf)               |
| SWELLING, SUBMANDIBULAR                                                            | 1                                       | 8.4591     | 37                                         | 14.4355       | 0.586(0.0801-4.2849)   |
| SWELLING, TESTICLE                                                                 | 0                                       | 0          | 8                                          | 3.4384        | 0(0-Inf)               |
| SWELLING, THROAT                                                                   | 0                                       | 0          | 3                                          | 0.6986        | 0(0-Inf)               |
| SWELLING, TRAUMATIC-SEE ALSO INJURY BY SITE                                        | 0                                       | 0          | 2                                          | 1.1619        | 0(0-Inf)               |
| SWIMMER'S, SHOULDER                                                                | 0                                       | 0          | 1                                          | 0.234         | 0(0-Inf)               |
| SYMBLEPHARON                                                                       | 0                                       | 0          | 7                                          | 1.8976        | 0(0-Inf)               |
| SYMPATHOGONIOMA CODE ALSO NEOPLASM MALIGNANT BY SITE                               | 0                                       | 0          | 1                                          | 0.398         | 0(0-Inf)               |
| SYMPHALANGIA                                                                       | 0                                       | 0          | 1                                          | 0.398         | 0(0-Inf)               |
| SYMPTOMS, ABDOMEN, NOS                                                             | 8                                       | 63.5225    | 214                                        | 73.9482       | 0.859(0.4233-1.7433)   |
| SYMPTOMS, BONE                                                                     | 0                                       | 0          | 8                                          | 2.9691        | 0(0-Inf)               |
| SYMPTOMS, BREAST, NOS                                                              | 2                                       | 14.8798    | 77                                         | 23.5448       | 0.632(0.1548-2.5807)   |
| SYMPTOMS, CARDIAC, NEC                                                             | 2                                       | 17.4803    | 55                                         | 22.3371       | 0.7826(0.1903-3.2185)  |
| SYMPTOMS, CHEST, NEC                                                               | 21                                      | 162.6131   | 595                                        | 196.2217      | 0.8287(0.5357-1.2821)  |
| SYMPTOMS, DRUG WITHDRAWAL (NON-PSYCHOTIC), CODE ALSO EFFECT ADVERSE DRUG IF STATED | 1                                       | 7.3058     | 17                                         | 5.0064        | 1.4593(0.1925-11.0641) |

| Description                                         | No. of Positive Cases with Disease Code | Case Rate* | No. of Positive Controls with Disease Code | Control Rate* | Relative Risk (95%CI)  |
|-----------------------------------------------------|-----------------------------------------|------------|--------------------------------------------|---------------|------------------------|
| SYMPTOMS, EAR, NEC                                  | 15                                      | 114.3731   | 255                                        | 81.1103       | 1.4101(0.8359-2.3788)  |
| SYMPTOMS, ENDOCRINE                                 | 0                                       | 0          | 2                                          | 0.4709        | 0(0-Inf)               |
| SYMPTOMS, EXTREMITY, NEC                            | 24                                      | 192.8367   | 655                                        | 230.8285      | 0.8354(0.5553-1.2568)  |
| SYMPTOMS, EYE, NEC                                  | 10                                      | 82.6266    | 401                                        | 148.797       | 0.5553(0.2961-1.0412)  |
| SYMPTOMS, GASTROINTESTINAL TRACT, NOS               | 13                                      | 105.116    | 336                                        | 119.9662      | 0.8762(0.5027-1.5272)  |
| SYMPTOMS, GASTROINTESTINAL TRACT, UPPER, NOS        | 1                                       | 6.9628     | 40                                         | 9.7343        | 0.7153(0.0979-5.2252)  |
| SYMPTOMS, GENITAL ORGANS, FEMALE, NOS               | 0                                       | 0          | 103                                        | 25.5263       | 0(0-Inf)               |
| SYMPTOMS, GENITAL ORGANS, MALE, NOS                 | 7                                       | 64.456     | 169                                        | 76.7048       | 0.8403(0.394-1.7921)   |
| SYMPTOMS, HAIR, NEC                                 | 0                                       | 0          | 10                                         | 2.9352        | 0(0-Inf)               |
| SYMPTOMS, JOINTS, NEC                               | 0                                       | 0          | 85                                         | 22.3365       | 0(0-Inf)               |
| SYMPTOMS, LARYNX, NEC                               | 2                                       | 14.685     | 8                                          | 2.4054        | 6.1049(1.2714-29.3134) |
| SYMPTOMS, MENOPAUSAL VASOMOTOR                      | 0                                       | 0          | 104                                        | 45.0614       | 0(0-Inf)               |
| SYMPTOMS, METABOLISM, NOS                           | 0                                       | 0          | 1                                          | 0.888         | 0(0-Inf)               |
| SYMPTOMS, MOUTH, NOS                                | 4                                       | 30.163     | 53                                         | 16.5721       | 1.8201(0.6551-5.0572)  |
| SYMPTOMS, MUSCULOSKELETAL, NOS                      | 3                                       | 21.4461    | 166                                        | 46.6023       | 0.4602(0.1467-1.4438)  |
| SYMPTOMS, NAILS, NOS                                | 3                                       | 24.1158    | 166                                        | 58.7443       | 0.4105(0.1309-1.2879)  |
| SYMPTOMS, NEC                                       | 39                                      | 350.8871   | 1115                                       | 469.8777      | 0.7468(0.5423-1.0284)  |
| SYMPTOMS, NEUROLOGIC, NOS--NNDX                     | 18                                      | 127.8783   | 443                                        | 108.1342      | 1.1826(0.737-1.8976)   |
| SYMPTOMS, NOSE, NEC                                 | 1                                       | 7.691      | 64                                         | 20.9304       | 0.3675(0.0509-2.655)   |
| SYMPTOMS, PERIMENOPAUSAL                            | 7                                       | 141.7779   | 327                                        | 157.8412      | 0.8982(0.4242-1.9018)  |
| SYMPTOMS, PERITONEUM, NEC                           | 0                                       | 0          | 2                                          | 1.7055        | 0(0-Inf)               |
| SYMPTOMS, POST-OPERATIVE NEC                        | 47                                      | 446.6844   | 1427                                       | 662.2393      | 0.6745(0.5041-0.9025)  |
| SYMPTOMS, PSYCHIATRIC,NOS-NPDX                      | 5                                       | 46.7753    | 84                                         | 37.8713       | 1.2351(0.4994-3.0544)  |
| SYMPTOMS, PSYCHOGENIC, NOS                          | 4                                       | 37.4593    | 61                                         | 15.5018       | 2.4164(0.8742-6.6798)  |
| SYMPTOMS, RADICULAR-SEE ALSO RADICULOPATHY          | 1                                       | 7.5478     | 79                                         | 24.8022       | 0.3043(0.0423-2.1918)  |
| SYMPTOMS, RESPIRATORY SYSTEM DYSFUNCTION, NEC       | 2                                       | 14.7972    | 79                                         | 19.7919       | 0.7476(0.1833-3.0499)  |
| SYMPTOMS, RESPIRATORY SYSTEM, NOS                   | 12                                      | 105.5911   | 255                                        | 104.3325      | 1.0121(0.5663-1.8087)  |
| SYMPTOMS, SENSATION, NEC (SMELL, TASTE. ETC #)      | 2                                       | 14.8265    | 75                                         | 22.7755       | 0.651(0.1594-2.6591)   |
| SYMPTOMS, SENSORY (INDETERMINATE)(NERVOUS SYSTEM #) | 1                                       | 8.5943     | 119                                        | 47.1809       | 0.1822(0.0254-1.3053)  |
| SYMPTOMS, SINUS, NEC                                | 6                                       | 43.5845    | 123                                        | 35.5062       | 1.2275(0.5392-2.7943)  |
| SYMPTOMS, SKIN, NOS                                 | 29                                      | 243.6594   | 563                                        | 212.2278      | 1.1481(0.7895-1.6697)  |
| SYMPTOMS, SUBCUTANEOUS TISSUE, NOS                  | 0                                       | 0          | 11                                         | 2.6933        | 0(0-Inf)               |
| SYMPTOMS, THROAT, NOS                               | 6                                       | 43.6388    | 199                                        | 57.7568       | 0.7556(0.3348-1.7053)  |
| SYMPTOMS, THYROID                                   | 3                                       | 22.1524    | 41                                         | 12.2446       | 1.8092(0.5566-5.8806)  |
| SYMPTOMS, TONGUE (BITING)                           | 2                                       | 17.5506    | 40                                         | 16.3764       | 1.0717(0.2579-4.4542)  |
| SYMPTOMS, TONSIL, NEC                               | 0                                       | 0          | 11                                         | 3.0086        | 0(0-Inf)               |
| SYMPTOMS, URINARY SYSTEM, NOS                       | 42                                      | 386.1324   | 912                                        | 395.1873      | 0.9771(0.7165-1.3324)  |
| SYMPTOMS, VASCULAR, NEC                             | 0                                       | 0          | 27                                         | 9.5425        | 0(0-Inf)               |
| SYMPTOMS, VISUAL, EPISODIC                          | 0                                       | 0          | 3                                          | 0.8875        | 0(0-Inf)               |
| SYMPTOMS, VISUAL, NOS                               | 0                                       | 0          | 244                                        | 90.9573       | 0(0-Inf)               |

| Description                                                  | No. of Positive Cases with Disease Code | Case Rate* | No. of Positive Controls with Disease Code | Control Rate* | Relative Risk (95%CI)    |
|--------------------------------------------------------------|-----------------------------------------|------------|--------------------------------------------|---------------|--------------------------|
| SYNCHYSIS (SCINTILLANS)                                      | 0                                       | 0          | 1                                          | 0.2354        | 0(0-Inf)                 |
| SYNCOPE, CARDIOGENIC                                         | 15                                      | 161.23     | 166                                        | 90.1658       | 1.7882(1.0518-3.0401)    |
| SYNCOPE, COUGH                                               | 1                                       | 13.7266    | 11                                         | 6.1116        | 2.246(0.2875-17.5467)    |
| SYNCOPE, HEAT                                                | 0                                       | 0          | 2                                          | 0.5476        | 0(0-Inf)                 |
| SYNCOPE, NOS                                                 | 61                                      | 635.7945   | 1295                                       | 664.2202      | 0.9572(0.7399-1.2383)    |
| SYNCOPE, ORTHOSTATIC                                         | 0                                       | 0          | 36                                         | 17.5299       | 0(0-Inf)                 |
| SYNCOPE, TUSSIVE                                             | 0                                       | 0          | 9                                          | 3.2692        | 0(0-Inf)                 |
| SYNCOPE, VASOVAGAL                                           | 16                                      | 121.8398   | 397                                        | 125.6619      | 0.9696(0.5874-1.6005)    |
| SYNDACTYLY                                                   | 0                                       | 0          | 1                                          | 0.2729        | 0(0-Inf)                 |
| SYNDESMOSIS TIBIOFIBULAR                                     | 1                                       | 7.0805     | 5                                          | 1.247         | 5.6782(0.6483-49.7306)   |
| SYNDROME, ADIE                                               | 0                                       | 0          | 4                                          | 0.9237        | 0(0-Inf)                 |
| SYNDROME, ADRENOGENITAL, NOS                                 | 0                                       | 0          | 1                                          | 0.234         | 0(0-Inf)                 |
| SYNDROME, AFFERENT LOOP                                      | 0                                       | 0          | 6                                          | 1.7127        | 0(0-Inf)                 |
| SYNDROME, ALCOHOL WITHDRAWAL                                 | 2                                       | 14.4737    | 70                                         | 20.9022       | 0.6924(0.1694-2.8307)    |
| SYNDROME, ALIEN HAND                                         | 0                                       | 0          | 1                                          | 0.8878        | 0(0-Inf)                 |
| SYNDROME, AMNESTIC, NOS                                      | 0                                       | 0          | 12                                         | 5.2455        | 0(0-Inf)                 |
| SYNDROME, ANGINAL                                            | 0                                       | 0          | 4                                          | 1.0918        | 0(0-Inf)                 |
| SYNDROME, ANTERIOR INTEROSSEUS NERVE                         | 0                                       | 0          | 3                                          | 1.0731        | 0(0-Inf)                 |
| SYNDROME, ANTERIOR, TIBIAL (KNEE/LEG#)                       | 1                                       | 14.019     | 2                                          | 0.5757        | 24.3502(2.1338-277.8749) |
| SYNDROME, ANTI PHOSPHOLIPID ANTIBODY                         | 0                                       | 0          | 18                                         | 5.0268        | 0(0-Inf)                 |
| SYNDROME, ANTICARDIOLIPIN                                    | 0                                       | 0          | 8                                          | 2.0529        | 0(0-Inf)                 |
| SYNDROME, ANTON'S                                            | 0                                       | 0          | 1                                          | 2.4855        | 0(0-Inf)                 |
| SYNDROME, AORTIC ARCH                                        | 0                                       | 0          | 2                                          | 0.7896        | 0(0-Inf)                 |
| SYNDROME, ARNOLD-CHIARI                                      | 0                                       | 0          | 1                                          | 0.398         | 0(0-Inf)                 |
| SYNDROME, ARTHRITIS/DERMATITIS                               | 0                                       | 0          | 1                                          | 0.4048        | 0(0-Inf)                 |
| SYNDROME, ASHERMAN'S                                         | 0                                       | 0          | 1                                          | 0.8277        | 0(0-Inf)                 |
| SYNDROME, ASYMMETRIC CORTICAL DEGENERATION (ACDS)            | 0                                       | 0          | 1                                          | 0.8528        | 0(0-Inf)                 |
| SYNDROME, ATTACHMENT PAIN (BACK)                             | 2                                       | 16.534     | 17                                         | 3.8846        | 4.2563(0.9705-18.6669)   |
| SYNDROME, AXENFELD'S                                         | 0                                       | 0          | 2                                          | 0.4708        | 0(0-Inf)                 |
| SYNDROME, BACTERIAL OVERGROWTH                               | 1                                       | 7.417      | 7                                          | 2.1131        | 3.5099(0.4234-29.0994)   |
| SYNDROME, BARLOW'S (MITRAL VALVE PROLAPSE)                   | 0                                       | 0          | 4                                          | 0.8815        | 0(0-Inf)                 |
| SYNDROME, BARLOW'S (MOELLER)                                 | 0                                       | 0          | 2                                          | 0.432         | 0(0-Inf)                 |
| SYNDROME, BARRETT'S (ESOPHAGUS)                              | 14                                      | 120.2416   | 238                                        | 93.4546       | 1.2866(0.7492-2.2096)    |
| SYNDROME, BASAL GANGLION                                     | 0                                       | 0          | 1                                          | 0.2354        | 0(0-Inf)                 |
| SYNDROME, BASILAR ARTERY                                     | 0                                       | 0          | 2                                          | 0.7052        | 0(0-Inf)                 |
| SYNDROME, BATTERED ADULT (SPOUSE) (FOLLOW-UP/COUNSELING/ETC) | 0                                       | 0          | 2                                          | 0.5908        | 0(0-Inf)                 |
| SYNDROME, BINSWANGER'S                                       | 0                                       | 0          | 1                                          | 0.4048        | 0(0-Inf)                 |
| SYNDROME, BLACK HEEL                                         | 0                                       | 0          | 1                                          | 0.2729        | 0(0-Inf)                 |
| SYNDROME, BLIGHTED OVUM                                      | 0                                       | 0          | 1                                          | 0.398         | 0(0-Inf)                 |

| Description                                                  | No. of Positive Cases with Disease Code | Case Rate* | No. of Positive Controls with Disease Code | Control Rate* | Relative Risk (95%CI)  |
|--------------------------------------------------------------|-----------------------------------------|------------|--------------------------------------------|---------------|------------------------|
| SYNDROME, BLUE EAR                                           | 0                                       | 0          | 1                                          | 0.8878        | 0(0-Inf)               |
| SYNDROME, BLUE RUBBER BLEB NEVUS                             | 0                                       | 0          | 1                                          | 0.3526        | 0(0-Inf)               |
| SYNDROME, BLUE TOES                                          | 1                                       | 11.8099    | 12                                         | 7.5697        | 1.5601(0.2014-12.0838) |
| SYNDROME, BORDERLINE (PERSONALITY)                           | 0                                       | 0          | 4                                          | 0.9158        | 0(0-Inf)               |
| SYNDROME, BRACHIAL PLEXUS                                    | 0                                       | 0          | 1                                          | 0.3526        | 0(0-Inf)               |
| SYNDROME, BRAIN, ACUTE, NOS                                  | 0                                       | 0          | 2                                          | 0.5908        | 0(0-Inf)               |
| SYNDROME, BRAIN, NOS                                         | 0                                       | 0          | 6                                          | 2.0983        | 0(0-Inf)               |
| SYNDROME, BRAIN, ORGANIC, ACUTE, C SYSTEMIC INTOXICATION     | 0                                       | 0          | 1                                          | 0.4751        | 0(0-Inf)               |
| SYNDROME, BRAIN, ORGANIC, ACUTE, NOS                         | 0                                       | 0          | 2                                          | 0.6309        | 0(0-Inf)               |
| SYNDROME, BRAIN, ORGANIC, CHRONIC, C BRAIN TRAUMA            | 0                                       | 0          | 2                                          | 0.6309        | 0(0-Inf)               |
| SYNDROME, BRAIN, ORGANIC, CHRONIC, C PHYSICAL CONDITION, NOS | 1                                       | 10.1223    | 0                                          | 0             | 14224843720.269(0-Inf) |
| SYNDROME, BRAIN, ORGANIC, CHRONIC, NOS--CBS                  | 0                                       | 0          | 86                                         | 44.895        | 0(0-Inf)               |
| SYNDROME, BRAIN, ORGANIC, NOS--OBS                           | 3                                       | 29.2364    | 62                                         | 29.7543       | 0.9826(0.3075-3.1402)  |
| SYNDROME, BRIQUET'S                                          | 0                                       | 0          | 1                                          | 0.2354        | 0(0-Inf)               |
| SYNDROME, BROWN-MCLEAN                                       | 0                                       | 0          | 1                                          | 0.8533        | 0(0-Inf)               |
| SYNDROME, BROWN'S (TENDON SHEATH) NOS                        | 0                                       | 0          | 5                                          | 1.2651        | 0(0-Inf)               |
| SYNDROME, BROWN-SEQUARD                                      | 0                                       | 0          | 1                                          | 0.2729        | 0(0-Inf)               |
| SYNDROME, BULBAR                                             | 0                                       | 0          | 3                                          | 2.0478        | 0(0-Inf)               |
| SYNDROME, BURNING FEET (DIETARY DEFICIENCY#)                 | 0                                       | 0          | 7                                          | 1.9431        | 0(0-Inf)               |
| SYNDROME, CAPGRAS' (REDUPLICATION DYSAMNESIA)                | 0                                       | 0          | 2                                          | 0.8098        | 0(0-Inf)               |
| SYNDROME, CARCINOID (CODE ALSO BY SITE IF STATED)            | 0                                       | 0          | 4                                          | 1.1816        | 0(0-Inf)               |
| SYNDROME, CAROTID SINUS                                      | 0                                       | 0          | 1                                          | 0.8877        | 0(0-Inf)               |
| SYNDROME, CARPAL TUNNEL, BILATERAL--CTSB                     | 26                                      | 184.4301   | 744                                        | 191.7818      | 0.9617(0.6497-1.4235)  |
| SYNDROME, CARPAL TUNNEL--CTS                                 | 62                                      | 456.5116   | 1669                                       | 440.6155      | 1.0361(0.8034-1.3361)  |
| SYNDROME, CAUDA EQUINA                                       | 0                                       | 0          | 20                                         | 8.0679        | 0(0-Inf)               |
| SYNDROME, CAVERNOUS SINUS                                    | 0                                       | 0          | 1                                          | 0.2354        | 0(0-Inf)               |
| SYNDROME, CENTRAL CORD, CURRENT INJURY                       | 0                                       | 0          | 1                                          | 0.2729        | 0(0-Inf)               |
| SYNDROME, CENTRAL CORD, NON-TRAUMATIC                        | 0                                       | 0          | 1                                          | 0.4751        | 0(0-Inf)               |
| SYNDROME, CENTRAL CORD, POST-TRAUMATIC                       | 0                                       | 0          | 5                                          | 1.2694        | 0(0-Inf)               |
| SYNDROME, CEREBELLAR ARTERY                                  | 0                                       | 0          | 2                                          | 2.9785        | 0(0-Inf)               |
| SYNDROME, CERVICAL DISC                                      | 0                                       | 0          | 10                                         | 2.5138        | 0(0-Inf)               |
| SYNDROME, CERVICAL RIB                                       | 0                                       | 0          | 2                                          | 1.1379        | 0(0-Inf)               |
| SYNDROME, CERVICAL ROOT                                      | 0                                       | 0          | 2                                          | 0.5458        | 0(0-Inf)               |
| SYNDROME, CERVICAL SPINE                                     | 0                                       | 0          | 2                                          | 0.5709        | 0(0-Inf)               |
| SYNDROME, CERVICAL, NOS                                      | 0                                       | 0          | 4                                          | 2.4033        | 0(0-Inf)               |
| SYNDROME, CHANDLER'S (EYE#)                                  | 0                                       | 0          | 1                                          | 0.234         | 0(0-Inf)               |
| SYNDROME, CHEST WALL                                         | 0                                       | 0          | 2                                          | 0.5908        | 0(0-Inf)               |
| SYNDROME, CHIARI-FROMMEL                                     | 0                                       | 0          | 2                                          | 1.6553        | 0(0-Inf)               |

| Description                                                                      | No. of Positive Cases with Disease Code | Case Rate* | No. of Positive Controls with Disease Code | Control Rate* | Relative Risk (95%CI)  |
|----------------------------------------------------------------------------------|-----------------------------------------|------------|--------------------------------------------|---------------|------------------------|
| SYNDROME, CHURG-STRAUSS                                                          | 0                                       | 0          | 1                                          | 0.234         | 0(0-Inf)               |
| SYNDROME, CLAUDE'S                                                               | 0                                       | 0          | 1                                          | 0.3526        | 0(0-Inf)               |
| SYNDROME, CLICK (HEART)                                                          | 2                                       | 21.9737    | 81                                         | 21.2704       | 1.0331(0.2533-4.2138)  |
| SYNDROME, CLICKING EAR                                                           | 0                                       | 0          | 3                                          | 1.2105        | 0(0-Inf)               |
| SYNDROME, CLUMSY HAND                                                            | 2                                       | 21.6207    | 15                                         | 8.4126        | 2.57(0.5825-11.3382)   |
| SYNDROME, COMPARTMENT, ANTERIOR (KNEE/LEG#)                                      | 0                                       | 0          | 10                                         | 2.4677        | 0(0-Inf)               |
| SYNDROME, COMPARTMENT, DORSAL (JOINT#)                                           | 0                                       | 0          | 1                                          | 0.2729        | 0(0-Inf)               |
| SYNDROME, COMPARTMENT, LOWER EXTREMITY (TRAUMATIC)                               | 1                                       | 9.1692     | 3                                          | 1.3158        | 6.9684(0.7046-68.9154) |
| SYNDROME, COMPARTMENT, NOS                                                       | 0                                       | 0          | 20                                         | 7.9031        | 0(0-Inf)               |
| SYNDROME, COMPARTMENT, POSTERIOR (JOINT#)                                        | 0                                       | 0          | 1                                          | 0.234         | 0(0-Inf)               |
| SYNDROME, COMPARTMENT, UPPER EXTREMITY (TRAUMATIC)                               | 0                                       | 0          | 1                                          | 0.234         | 0(0-Inf)               |
| SYNDROME, CONCUSSION (LATE EFFECT)                                               | 0                                       | 0          | 17                                         | 4.4636        | 0(0-Inf)               |
| SYNDROME, CONTACT OVERWEAR                                                       | 0                                       | 0          | 1                                          | 0.8276        | 0(0-Inf)               |
| SYNDROME, CONUS MEDULLARIS                                                       | 0                                       | 0          | 1                                          | 1.0366        | 0(0-Inf)               |
| SYNDROME, CORONARY (ARTERY) STEAL                                                | 0                                       | 0          | 1                                          | 0.2354        | 0(0-Inf)               |
| SYNDROME, COSTEN'S                                                               | 0                                       | 0          | 1                                          | 0.398         | 0(0-Inf)               |
| SYNDROME, CREST                                                                  | 0                                       | 0          | 16                                         | 4.2838        | 0(0-Inf)               |
| SYNDROME, CRST                                                                   | 0                                       | 0          | 6                                          | 1.3099        | 0(0-Inf)               |
| SYNDROME, CUBITAL TUNNEL (ULNAR TUNNEL)                                          | 0                                       | 0          | 51                                         | 12.9084       | 0(0-Inf)               |
| SYNDROME, CUSHINGOID DUE TO STEROIDS                                             | 0                                       | 0          | 4                                          | 1.6244        | 0(0-Inf)               |
| SYNDROME, CUSHING'S                                                              | 0                                       | 0          | 11                                         | 2.5359        | 0(0-Inf)               |
| SYNDROME, DE QUERVAIN'S                                                          | 1                                       | 7.1779     | 67                                         | 15.2329       | 0.4712(0.0653-3.4028)  |
| SYNDROME, DEAFFERENTATION                                                        | 0                                       | 0          | 1                                          | 2.4859        | 0(0-Inf)               |
| SYNDROME, DESCENDING PERINEUM (FEMALE)                                           | 0                                       | 0          | 2                                          | 0.432         | 0(0-Inf)               |
| SYNDROME, DIABETIC HAND                                                          | 0                                       | 0          | 2                                          | 0.4854        | 0(0-Inf)               |
| SYNDROME, DISH                                                                   | 1                                       | 10.0372    | 8                                          | 4.0636        | 2.47(0.3058-19.9493)   |
| SYNDROME, DISUSE                                                                 | 0                                       | 0          | 3                                          | 1.9763        | 0(0-Inf)               |
| SYNDROME, DRESSLER'S                                                             | 0                                       | 0          | 10                                         | 4.2693        | 0(0-Inf)               |
| SYNDROME, DROPPED SOCKET                                                         | 0                                       | 0          | 2                                          | 0.5909        | 0(0-Inf)               |
| SYNDROME, DRUG WITHDRAWAL (NON-PSYCHOTIC#), CODE ALSO EFFECT ADVERSE DRUG STATED | 0                                       | 0          | 22                                         | 7.6151        | 0(0-Inf)               |
| SYNDROME, DRUG WITHDRAWAL (PSYCHOTIC#), CODE ALSO EFFECT ADVERSE DRUG STATED     | 0                                       | 0          | 6                                          | 1.3973        | 0(0-Inf)               |
| SYNDROME, DRY EYE                                                                | 26                                      | 214.2826   | 764                                        | 278.9511      | 0.7682(0.5191-1.1367)  |
| SYNDROME, DUANE'S (ACQUIRED)                                                     | 0                                       | 0          | 1                                          | 0.234         | 0(0-Inf)               |
| SYNDROME, DUANE'S, NOS                                                           | 0                                       | 0          | 2                                          | 0.5837        | 0(0-Inf)               |
| SYNDROME, DUMPING                                                                | 1                                       | 8.169      | 25                                         | 9.1474        | 0.893(0.1204-6.6247)   |
| SYNDROME, DUMPING, POSTGASTRECTOMY                                               | 1                                       | 7.3049     | 17                                         | 3.9988        | 1.8268(0.2408-13.8589) |
| SYNDROME, DYSCONTROL                                                             | 1                                       | 14.8825    | 3                                          | 2.5784        | 5.772(0.5903-56.4342)  |
| SYNDROME, DYSMYELOPOIETIC                                                        | 0                                       | 0          | 1                                          | 0.3526        | 0(0-Inf)               |

| Description                                 | No. of Positive Cases with Disease Code | Case Rate* | No. of Positive Controls with Disease Code | Control Rate* | Relative Risk (95%CI)  |
|---------------------------------------------|-----------------------------------------|------------|--------------------------------------------|---------------|------------------------|
| SYNDROME, DYSPLASTIC NEVUS                  | 0                                       | 0          | 2                                          | 0.8722        | 0(0-Inf)               |
| SYNDROME, EAGLE'S                           | 0                                       | 0          | 2                                          | 0.432         | 0(0-Inf)               |
| SYNDROME, EATON-LAMBERT                     | 0                                       | 0          | 1                                          | 0.234         | 0(0-Inf)               |
| SYNDROME, EFFERENT LOOP                     | 0                                       | 0          | 5                                          | 1.6797        | 0(0-Inf)               |
| SYNDROME, EFFORT                            | 0                                       | 0          | 1                                          | 0.4048        | 0(0-Inf)               |
| SYNDROME, EHLERS-DANLOS                     | 0                                       | 0          | 1                                          | 0.398         | 0(0-Inf)               |
| SYNDROME, EISENMENGER'S                     | 0                                       | 0          | 1                                          | 0.2729        | 0(0-Inf)               |
| SYNDROME, ENTRAPMENT (NERVE)                | 2                                       | 13.9887    | 11                                         | 2.8113        | 4.9759(1.0828-22.8671) |
| SYNDROME, EPSTEIN-BARR, VIRAL               | 0                                       | 0          | 5                                          | 1.1788        | 0(0-Inf)               |
| SYNDROME, EUTHYROID SICK                    | 0                                       | 0          | 7                                          | 5.7621        | 0(0-Inf)               |
| SYNDROME, EXFOLIATION (EYE)                 | 5                                       | 52.2607    | 91                                         | 49.2747       | 1.0606(0.4299-2.6163)  |
| SYNDROME, EXPLODING HEAD                    | 0                                       | 0          | 4                                          | 1.1699        | 0(0-Inf)               |
| SYNDROME, EXTENSOR COMPARTMENT (WRIST)      | 0                                       | 0          | 7                                          | 2.0567        | 0(0-Inf)               |
| SYNDROME, EXTENSOR COMPARTMENT, NOS         | 1                                       | 12.015     | 19                                         | 5.9779        | 2.0099(0.2672-15.1214) |
| SYNDROME, EXTENSOR ORIGIN                   | 0                                       | 0          | 15                                         | 5.1473        | 0(0-Inf)               |
| SYNDROME, EXTRAPYRAMIDAL (MOVEMENT)         | 0                                       | 0          | 75                                         | 49.6658       | 0(0-Inf)               |
| SYNDROME, FACET                             | 3                                       | 20.9109    | 83                                         | 21.2654       | 0.9833(0.3097-3.1221)  |
| SYNDROME, FAILED BACK                       | 0                                       | 0          | 2                                          | 0.7896        | 0(0-Inf)               |
| SYNDROME, FAMILIAL CANCER                   | 0                                       | 0          | 7                                          | 1.9888        | 0(0-Inf)               |
| SYNDROME, FANCONI (RICKETS#)                | 0                                       | 0          | 1                                          | 0.8878        | 0(0-Inf)               |
| SYNDROME, FANCONI'S (ANEMIA)(PANMYELOPATHY) | 0                                       | 0          | 1                                          | 0.8878        | 0(0-Inf)               |
| SYNDROME, FATIGUE (CHRONIC)                 | 0                                       | 0          | 9                                          | 2.7447        | 0(0-Inf)               |
| SYNDROME, FELTY'S                           | 0                                       | 0          | 3                                          | 0.7063        | 0(0-Inf)               |
| SYNDROME, FIBRILLATION-FLUTTER              | 0                                       | 0          | 1                                          | 1.9083        | 0(0-Inf)               |
| SYNDROME, FIBROSITIC, SEE ALSO FIBROSITIS   | 0                                       | 0          | 1                                          | 0.3526        | 0(0-Inf)               |
| SYNDROME, FLAT BACK                         | 0                                       | 0          | 4                                          | 1.1698        | 0(0-Inf)               |
| SYNDROME, FLECKED RETINA                    | 0                                       | 0          | 1                                          | 0.3527        | 0(0-Inf)               |
| SYNDROME, FLEXOR ORIGIN, ELBOW              | 1                                       | 22.3248    | 6                                          | 2.5823        | 8.6454(1.0256-72.875)  |
| SYNDROME, FLEXOR ORIGIN, NOS                | 0                                       | 0          | 3                                          | 1.6181        | 0(0-Inf)               |
| SYNDROME, FLOPPY EYELID                     | 0                                       | 0          | 6                                          | 2.0361        | 0(0-Inf)               |
| SYNDROME, FLOPPY VALVE (MITRAL)             | 0                                       | 0          | 27                                         | 10.5933       | 0(0-Inf)               |
| SYNDROME, FLU                               | 0                                       | 0          | 3                                          | 0.7063        | 0(0-Inf)               |
| SYNDROME, FREY'S                            | 0                                       | 0          | 10                                         | 2.7664        | 0(0-Inf)               |
| SYNDROME, FRONTAL LOBE, NOS                 | 0                                       | 0          | 3                                          | 1.5108        | 0(0-Inf)               |
| SYNDROME, FUNCTIONAL BLADDER                | 0                                       | 0          | 1                                          | 0.2729        | 0(0-Inf)               |
| SYNDROME, GAISBOCK'S                        | 0                                       | 0          | 1                                          | 0.4751        | 0(0-Inf)               |
| SYNDROME, GERSTMANN'S                       | 0                                       | 0          | 1                                          | 0.4048        | 0(0-Inf)               |
| SYNDROME, GILBERT'S                         | 1                                       | 8.0389     | 41                                         | 10.9062       | 0.7371(0.1011-5.3751)  |
| SYNDROME, GREEN NAIL                        | 0                                       | 0          | 2                                          | 0.5709        | 0(0-Inf)               |
| SYNDROME, GUILLAIN-BARRE                    | 2                                       | 14.3607    | 19                                         | 5.4752        | 2.6229(0.605-11.3715)  |

| Description                                 | No. of Positive Cases with Disease Code | Case Rate* | No. of Positive Controls with Disease Code | Control Rate* | Relative Risk (95%CI)   |
|---------------------------------------------|-----------------------------------------|------------|--------------------------------------------|---------------|-------------------------|
| SYNDROME, GUYON'S                           | 0                                       | 0          | 5                                          | 1.1788        | 0(0-Inf)                |
| SYNDROME, HAMATE HAMMER                     | 0                                       | 0          | 1                                          | 0.234         | 0(0-Inf)                |
| SYNDROME, HARADA'S                          | 1                                       | 22.5201    | 0                                          | 0             | 139234156982.691(0-Inf) |
| SYNDROME, HEAD, TRAUMATIC                   | 0                                       | 0          | 1                                          | 1.0362        | 0(0-Inf)                |
| SYNDROME, HEEL PAD                          | 1                                       | 6.9514     | 19                                         | 4.48          | 1.5517(0.2058-11.6997)  |
| SYNDROME, HEMIPARAPLEGIC                    | 0                                       | 0          | 1                                          | 2.4855        | 0(0-Inf)                |
| SYNDROME, HEMOLYTIC UREMIC                  | 0                                       | 0          | 1                                          | 0.2729        | 0(0-Inf)                |
| SYNDROME, HEPATORENAL                       | 0                                       | 0          | 4                                          | 0.967         | 0(0-Inf)                |
| SYNDROME, HISTOPLASMOSIS, OCULAR (POHS)     | 0                                       | 0          | 6                                          | 1.604         | 0(0-Inf)                |
| SYNDROME, HOLIDAY HEART                     | 0                                       | 0          | 2                                          | 0.9502        | 0(0-Inf)                |
| SYNDROME, HORNER'S                          | 1                                       | 6.9841     | 34                                         | 8.4194        | 0.8295(0.113-6.0874)    |
| SYNDROME, HYOID TIP (PAIN)                  | 0                                       | 0          | 2                                          | 0.4681        | 0(0-Inf)                |
| SYNDROME, HYPERKINETIC HEART, NEC           | 0                                       | 0          | 2                                          | 0.5838        | 0(0-Inf)                |
| SYNDROME, HYPERPERFUSION                    | 0                                       | 0          | 1                                          | 0.8528        | 0(0-Inf)                |
| SYNDROME, HYPERSYMPATHETIC                  | 1                                       | 30.5806    | 0                                          | 0             | 14394612754.4099(0-Inf) |
| SYNDROME, HYPERVENTILATION, CAUSE SPECIFIED | 0                                       | 0          | 2                                          | 1.0784        | 0(0-Inf)                |
| SYNDROME, HYPERVENTILATION, NOS             | 6                                       | 60.9369    | 87                                         | 22.9641       | 2.6536(1.1553-6.0951)   |
| SYNDROME, HYPERVISCOSITY                    | 0                                       | 0          | 1                                          | 0.8877        | 0(0-Inf)                |
| SYNDROME, HYPOVENTILATION, CAUSE SPECIFIED  | 0                                       | 0          | 24                                         | 7.2407        | 0(0-Inf)                |
| SYNDROME, HYPOVENTILATION, NOS              | 1                                       | 7.638      | 14                                         | 4.6036        | 1.6591(0.2162-12.7305)  |
| SYNDROME, ILIAC-CREST                       | 1                                       | 7.1967     | 0                                          | 0             | 12741532230.6053(0-Inf) |
| SYNDROME, ILIOTIBIAL BAND                   | 3                                       | 21.3793    | 143                                        | 39.3868       | 0.5428(0.1726-1.7066)   |
| SYNDROME, IMPACTION, SEE ALSO IMPINGEMENT   | 0                                       | 0          | 2                                          | 0.4708        | 0(0-Inf)                |
| SYNDROME, IMPINGEMENT, ELBOW                | 0                                       | 0          | 16                                         | 4.4212        | 0(0-Inf)                |
| SYNDROME, IMPINGEMENT, LOWER EXTREMITY      | 2                                       | 14.3519    | 58                                         | 16.3036       | 0.8803(0.2142-3.6181)   |
| SYNDROME, IMPINGEMENT, NEC                  | 0                                       | 0          | 48                                         | 12.672        | 0(0-Inf)                |
| SYNDROME, IMPINGEMENT, SHOULDER             | 27                                      | 191.7652   | 723                                        | 186.6524      | 1.0274(0.6989-1.5102)   |
| SYNDROME, IMPINGEMENT, SUBACROMIAL          | 2                                       | 13.8729    | 124                                        | 31.4467       | 0.4412(0.1089-1.7869)   |
| SYNDROME, IMPINGEMENT, UPPER EXTREMITY, NOS | 0                                       | 0          | 31                                         | 8.6612        | 0(0-Inf)                |
| SYNDROME, IMPINGEMENT, WRIST                | 1                                       | 6.9881     | 13                                         | 3.4341        | 2.0349(0.2632-15.7354)  |
| SYNDROME, INFLUENZA, ACUTE                  | 5                                       | 48.5946    | 145                                        | 37.4952       | 1.296(0.5301-3.1686)    |
| SYNDROME, INFLUENZA-LIKE                    | 12                                      | 84.0631    | 227                                        | 56.2795       | 1.4937(0.8338-2.6758)   |
| SYNDROME, INTEROSSEOUS                      | 0                                       | 0          | 4                                          | 1.1513        | 0(0-Inf)                |
| SYNDROME, INTERSECTION                      | 0                                       | 0          | 14                                         | 3.1275        | 0(0-Inf)                |
| SYNDROME, INTERSPINOUS LIGAMENT             | 0                                       | 0          | 4                                          | 1.3089        | 0(0-Inf)                |
| SYNDROME, INTESTINAL, GAS                   | 0                                       | 0          | 1                                          | 0.4049        | 0(0-Inf)                |
| SYNDROME, IRIDOCORNEAL-ENDOTHELIAL (ICE)    | 0                                       | 0          | 3                                          | 0.6536        | 0(0-Inf)                |
| SYNDROME, IRIS-CHAFE (CONTACT LENS PROBLEM) | 0                                       | 0          | 1                                          | 0.8882        | 0(0-Inf)                |
| SYNDROME, IRRITABLE BOWEL--IBS              | 53                                      | 400.6785   | 1616                                       | 401.863       | 0.9971(0.7578-1.3119)   |
| SYNDROME, IRVINE-GASS                       | 0                                       | 0          | 1                                          | 0.2729        | 0(0-Inf)                |

| Description                              | No. of Positive Cases with Disease Code | Case Rate* | No. of Positive Controls with Disease Code | Control Rate* | Relative Risk (95%CI)   |
|------------------------------------------|-----------------------------------------|------------|--------------------------------------------|---------------|-------------------------|
| SYNDROME, ISCHEMIC BOWEL                 | 0                                       | 0          | 8                                          | 5.2786        | 0(0-Inf)                |
| SYNDROME, ISSAC'S                        | 0                                       | 0          | 1                                          | 0.2354        | 0(0-Inf)                |
| SYNDROME, JOUBERT'S                      | 0                                       | 0          | 1                                          | 0.2728        | 0(0-Inf)                |
| SYNDROME, KLINEFELTER'S                  | 0                                       | 0          | 5                                          | 1.6015        | 0(0-Inf)                |
| SYNDROME, KLIPPEL-FEIL                   | 0                                       | 0          | 1                                          | 0.2729        | 0(0-Inf)                |
| SYNDROME, LARGE GRANULAR LYMPHOCYTE      | 0                                       | 0          | 2                                          | 1.898         | 0(0-Inf)                |
| SYNDROME, LATERAL COMPRESSION            | 0                                       | 0          | 1                                          | 0.4751        | 0(0-Inf)                |
| SYNDROME, LATERAL CUTANEOUS NERVE        | 0                                       | 0          | 3                                          | 0.7021        | 0(0-Inf)                |
| SYNDROME, LATERAL MEDULLARY              | 0                                       | 0          | 1                                          | 0.8878        | 0(0-Inf)                |
| SYNDROME, LATERAL RECESS                 | 0                                       | 0          | 73                                         | 27.5032       | 0(0-Inf)                |
| SYNDROME, LENNOX (GASTAUT)               | 0                                       | 0          | 1                                          | 0.398         | 0(0-Inf)                |
| SYNDROME, LERICHE'S                      | 0                                       | 0          | 2                                          | 1.0786        | 0(0-Inf)                |
| SYNDROME, LEVATOR ANI                    | 0                                       | 0          | 1                                          | 0.3526        | 0(0-Inf)                |
| SYNDROME, LEVATOR SCAPULA                | 0                                       | 0          | 1                                          | 0.2729        | 0(0-Inf)                |
| SYNDROME, LINBERG (LINBURG)              | 1                                       | 25.7465    | 1                                          | 0.431         | 59.7381(3.662-974.5139) |
| SYNDROME, LOFGREN'S                      | 0                                       | 0          | 1                                          | 0.398         | 0(0-Inf)                |
| SYNDROME, LOIN-HEMATURIA                 | 0                                       | 0          | 3                                          | 0.7886        | 0(0-Inf)                |
| SYNDROME, LOW SPINAL FLUID PRESSURE      | 0                                       | 0          | 1                                          | 0.234         | 0(0-Inf)                |
| SYNDROME, LOWN-GANONG-LEVINE             | 0                                       | 0          | 1                                          | 0.2354        | 0(0-Inf)                |
| SYNDROME, LYNCH II                       | 0                                       | 0          | 1                                          | 0.234         | 0(0-Inf)                |
| SYNDROME, MALABSORPTION                  | 1                                       | 6.9698     | 5                                          | 1.2842        | 5.4272(0.6173-47.7136)  |
| SYNDROME, MALALIGNMENT (LOWER EXTREMITY) | 3                                       | 20.8687    | 33                                         | 8.4459        | 2.4709(0.7518-8.1204)   |
| SYNDROME, MALLORY-WEISS                  | 4                                       | 32.4357    | 44                                         | 15.8968       | 2.0404(0.7292-5.7092)   |
| SYNDROME, MARFANOID HYPERMOBILITY        | 0                                       | 0          | 1                                          | 0.4751        | 0(0-Inf)                |
| SYNDROME, MARFAN'S                       | 0                                       | 0          | 5                                          | 1.3402        | 0(0-Inf)                |
| SYNDROME, MASSETER MUSCLE                | 0                                       | 0          | 1                                          | 0.234         | 0(0-Inf)                |
| SYNDROME, MECHANICAL BACK                | 1                                       | 7.158      | 24                                         | 6.7783        | 1.056(0.1419-7.8562)    |
| SYNDROME, MEDIAL COMPARTMENT (KNEE)      | 0                                       | 0          | 14                                         | 3.6342        | 0(0-Inf)                |
| SYNDROME, MEIGS'S                        | 0                                       | 0          | 5                                          | 2.0027        | 0(0-Inf)                |
| SYNDROME, MEIGS' (OVARY #)               | 0                                       | 0          | 2                                          | 0.432         | 0(0-Inf)                |
| SYNDROME, MENIERE'S                      | 2                                       | 14.5543    | 19                                         | 5.6973        | 2.5546(0.5897-11.0672)  |
| SYNDROME, MENOPAUSAL                     | 10                                      | 187.5268   | 675                                        | 321.1002      | 0.584(0.3125-1.0914)    |
| SYNDROME, MENSTRUATION                   | 1                                       | 52.7163    | 15                                         | 13.1606       | 4.0056(0.5271-30.4391)  |
| SYNDROME, MIDDLE LOBE                    | 2                                       | 14.8105    | 9                                          | 2.7072        | 5.4707(1.1575-25.8569)  |
| SYNDROME, MILK ALKALI                    | 0                                       | 0          | 1                                          | 0.8877        | 0(0-Inf)                |
| SYNDROME, MILLER FISHER'S                | 1                                       | 6.8785     | 0                                          | 0             | 12223745435.022(0-Inf)  |
| SYNDROME, MILWAUKEE SHOULDER             | 0                                       | 0          | 1                                          | 0.888         | 0(0-Inf)                |
| SYNDROME, MONDER'S (MONDOR'S)            | 0                                       | 0          | 4                                          | 0.9158        | 0(0-Inf)                |
| SYNDROME, MONOFIXATION                   | 0                                       | 0          | 2                                          | 0.4854        | 0(0-Inf)                |
| SYNDROME, MORNING GLORY                  | 0                                       | 0          | 1                                          | 0.4049        | 0(0-Inf)                |



| Description                                                                | No. of Positive Cases with Disease Code | Case Rate* | No. of Positive Controls with Disease Code | Control Rate* | Relative Risk (95%CI)  |
|----------------------------------------------------------------------------|-----------------------------------------|------------|--------------------------------------------|---------------|------------------------|
| SYNDROME, MORTON'S, PLANTAR NEUROMA                                        | 0                                       | 0          | 1                                          | 0.398         | 0(0-Inf)               |
| SYNDROME, MOUNIER-KUHN                                                     | 0                                       | 0          | 1                                          | 0.4048        | 0(0-Inf)               |
| SYNDROME, MUCOUS FISH(ING)                                                 | 0                                       | 0          | 2                                          | 0.4853        | 0(0-Inf)               |
| SYNDROME, MUIR-TORRES                                                      | 0                                       | 0          | 3                                          | 3.7642        | 0(0-Inf)               |
| SYNDROME, MYASTHENIC                                                       | 0                                       | 0          | 2                                          | 0.4708        | 0(0-Inf)               |
| SYNDROME, MYELODYSPLASTIC (MYELOPROLIFERATIVE)                             | 6                                       | 78.4491    | 62                                         | 45.1276       | 1.7384(0.7496-4.0314)  |
| SYNDROME, MYOFASCIAL                                                       | 3                                       | 20.9003    | 148                                        | 35.2646       | 0.5927(0.1886-1.8627)  |
| SYNDROME, NEPHROTIC, DIABETIC                                              | 0                                       | 0          | 7                                          | 1.8251        | 0(0-Inf)               |
| SYNDROME, NEPHROTIC, NOS                                                   | 6                                       | 52.4652    | 51                                         | 20.7327       | 2.5306(1.0806-5.9261)  |
| SYNDROME, NUMB CHIN /LIP                                                   | 0                                       | 0          | 1                                          | 0.234         | 0(0-Inf)               |
| SYNDROME, OCCUPATIONAL (STRESS)                                            | 0                                       | 0          | 5                                          | 1.2092        | 0(0-Inf)               |
| SYNDROME, OGILVIE                                                          | 1                                       | 10.2187    | 7                                          | 3.6269        | 2.8175(0.3417-23.2302) |
| SYNDROME, OSLER WEBER RENDU                                                | 0                                       | 0          | 5                                          | 1.2019        | 0(0-Inf)               |
| SYNDROME, OUTLET, THORACIC                                                 | 1                                       | 9.7009     | 52                                         | 14.0195       | 0.692(0.0954-5.0206)   |
| SYNDROME, OVARIAN REMNANT                                                  | 0                                       | 0          | 1                                          | 0.2354        | 0(0-Inf)               |
| SYNDROME, OVERLAP (CONNECTIVE TISSUE)                                      | 1                                       | 7.8261     | 5                                          | 1.6845        | 4.646(0.5299-40.7317)  |
| SYNDROME, OVERLAP, NOS (TOE)                                               | 0                                       | 0          | 2                                          | 1.1972        | 0(0-Inf)               |
| SYNDROME, OVERUSE (DUE TO PHYSICAL ACTIVITY) CODE ALSO<br>CONDITION STATED | 0                                       | 0          | 3                                          | 0.7885        | 0(0-Inf)               |
| SYNDROME, OVERUSE (FATIGUE#)                                               | 0                                       | 0          | 6                                          | 2.3323        | 0(0-Inf)               |
| SYNDROME, OVERUSE BACK                                                     | 0                                       | 0          | 15                                         | 3.4485        | 0(0-Inf)               |
| SYNDROME, OVERUSE LOWER EXTREMITY                                          | 5                                       | 35.195     | 100                                        | 23.9678       | 1.4684(0.5959-3.6186)  |
| SYNDROME, OVERUSE NECK                                                     | 0                                       | 0          | 3                                          | 0.9165        | 0(0-Inf)               |
| SYNDROME, OVERUSE NOS                                                      | 3                                       | 21.2628    | 45                                         | 10.668        | 1.9931(0.6155-6.4538)  |
| SYNDROME, OVERUSE TRUNK                                                    | 0                                       | 0          | 4                                          | 0.9236        | 0(0-Inf)               |
| SYNDROME, OVERUSE UPPER EXTREMITY                                          | 7                                       | 51.765     | 170                                        | 39.6826       | 1.3045(0.6109-2.7853)  |
| SYNDROME, PACEMAKER                                                        | 0                                       | 0          | 10                                         | 4.8631        | 0(0-Inf)               |
| SYNDROME, PAIN AMPLIFICATION                                               | 0                                       | 0          | 1                                          | 0.234         | 0(0-Inf)               |
| SYNDROME, PAINFUL ARC (SHOULDER)                                           | 0                                       | 0          | 1                                          | 0.8879        | 0(0-Inf)               |
| SYNDROME, PAINFUL FEET-MOVING TOES                                         | 0                                       | 0          | 1                                          | 0.2354        | 0(0-Inf)               |
| SYNDROME, PARINAUD'S                                                       | 0                                       | 0          | 1                                          | 0.398         | 0(0-Inf)               |
| SYNDROME, PARSONAGE-TURNER                                                 | 0                                       | 0          | 9                                          | 2.7004        | 0(0-Inf)               |
| SYNDROME, PATELLAR (PAIN)                                                  | 0                                       | 0          | 8                                          | 1.9775        | 0(0-Inf)               |
| SYNDROME, PATELLAR COMPRESSION (INJURY#)                                   | 0                                       | 0          | 1                                          | 0.398         | 0(0-Inf)               |
| SYNDROME, PATELLAR COMPRESSION (JOINT DISEASE#)                            | 0                                       | 0          | 1                                          | 0.4751        | 0(0-Inf)               |
| SYNDROME, PATELLOFEMORAL (PAIN)                                            | 4                                       | 27.7957    | 276                                        | 67.6984       | 0.4106(0.1528-1.1031)  |
| SYNDROME, PATULOUS EUSTACHIAN TUBE                                         | 0                                       | 0          | 9                                          | 2.9127        | 0(0-Inf)               |
| SYNDROME, PELVIC CONGESTION-FIBROSIS                                       | 0                                       | 0          | 5                                          | 2.6434        | 0(0-Inf)               |
| SYNDROME, PERICAPSULAR, EXTREMITY, UPPER                                   | 1                                       | 12.8226    | 11                                         | 3.2497        | 3.9458(0.503-30.952)   |
| SYNDROME, PERINEAL                                                         | 0                                       | 0          | 1                                          | 0.2354        | 0(0-Inf)               |

| Description                                                  | No. of Positive Cases with Disease Code | Case Rate* | No. of Positive Controls with Disease Code | Control Rate* | Relative Risk (95%CI)  |
|--------------------------------------------------------------|-----------------------------------------|------------|--------------------------------------------|---------------|------------------------|
| SYNDROME, PERINEOPLASTIC/PARANEOPLASTIC                      | 0                                       | 0          | 1                                          | 0.398         | 0(0-Inf)               |
| SYNDROME, PEUTZ-JEGHERS                                      | 0                                       | 0          | 1                                          | 0.2729        | 0(0-Inf)               |
| SYNDROME, PICK'S                                             | 0                                       | 0          | 2                                          | 0.8096        | 0(0-Inf)               |
| SYNDROME, PICKWICKIAN                                        | 0                                       | 0          | 6                                          | 1.4821        | 0(0-Inf)               |
| SYNDROME, PIGMENT DISPERSION (EYE)                           | 0                                       | 0          | 50                                         | 13.0838       | 0(0-Inf)               |
| SYNDROME, PIGMENT DISPERSION (SKIN)                          | 0                                       | 0          | 12                                         | 3.7055        | 0(0-Inf)               |
| SYNDROME, PILLAR                                             | 0                                       | 0          | 1                                          | 0.234         | 0(0-Inf)               |
| SYNDROME, PLUMMER-VINSON                                     | 0                                       | 0          | 2                                          | 0.81          | 0(0-Inf)               |
| SYNDROME, PLURIGLANDULAR/POLYGLANDULAR                       | 0                                       | 0          | 1                                          | 0.398         | 0(0-Inf)               |
| SYNDROME, POLYMYALGIA                                        | 0                                       | 0          | 5                                          | 2.7033        | 0(0-Inf)               |
| SYNDROME, POST THORACOTOMY                                   | 1                                       | 7.6764     | 40                                         | 13.1661       | 0.583(0.0799-4.2558)   |
| SYNDROME, POST TRAUMATIC                                     | 3                                       | 27.0836    | 24                                         | 6.2952        | 4.3023(1.2832-14.4246) |
| SYNDROME, POST TRAUMATIC STRESS                              | 0                                       | 0          | 7                                          | 1.9653        | 0(0-Inf)               |
| SYNDROME, POSTCARDIOTOMY                                     | 0                                       | 0          | 18                                         | 6.2058        | 0(0-Inf)               |
| SYNDROME, POSTCHOLECYSTECTOMY                                | 0                                       | 0          | 16                                         | 3.5956        | 0(0-Inf)               |
| SYNDROME, POST-CONTUSION, BRAIN NOS                          | 0                                       | 0          | 2                                          | 0.5457        | 0(0-Inf)               |
| SYNDROME, POSTERIOR POLYMORPHOUS                             | 0                                       | 0          | 2                                          | 1.1619        | 0(0-Inf)               |
| SYNDROME, POSTGASTRECTOMY (DUMPING)                          | 2                                       | 13.8859    | 13                                         | 3.2814        | 4.2316(0.9412-19.0248) |
| SYNDROME, POSTHERPETIC, (NEURALGIA), CODE ALSO HERPES ZOSTER | 0                                       | 0          | 1                                          | 0.3526        | 0(0-Inf)               |
| SYNDROME, POSTINFARCTION                                     | 0                                       | 0          | 2                                          | 0.8099        | 0(0-Inf)               |
| SYNDROME, POSTLAMINECTOMY                                    | 9                                       | 63.0039    | 153                                        | 40.1115       | 1.5707(0.7996-3.0855)  |
| SYNDROME, POST-LUMBAR SYMPATHECTOMY                          | 0                                       | 0          | 1                                          | 0.234         | 0(0-Inf)               |
| SYNDROME, POSTMENOPAUSAL                                     | 1                                       | 15.075     | 68                                         | 29.4775       | 0.5114(0.0708-3.6921)  |
| SYNDROME, POST-PACEMAKER                                     | 0                                       | 0          | 1                                          | 0.8528        | 0(0-Inf)               |
| SYNDROME, POSTPERICARDIOTOMY                                 | 0                                       | 0          | 21                                         | 6.3206        | 0(0-Inf)               |
| SYNDROME, POSTPHLEBITIC                                      | 4                                       | 32.4128    | 56                                         | 20.0978       | 1.6128(0.5822-4.4673)  |
| SYNDROME, POST-SYMPATHECTOMY                                 | 0                                       | 0          | 1                                          | 0.398         | 0(0-Inf)               |
| SYNDROME, POSTURAL ORTHOSTATIC TACHYCARDIA (POTS)            | 0                                       | 0          | 3                                          | 1.2108        | 0(0-Inf)               |
| SYNDROME, POSTVAGOTOMY                                       | 2                                       | 13.8587    | 8                                          | 2.0812        | 6.6591(1.3884-31.9378) |
| SYNDROME, POST-VIRAL (FATIGUE#)                              | 1                                       | 7.0436     | 66                                         | 15.5347       | 0.4534(0.0628-3.2748)  |
| SYNDROME, PRECORDIAL CATCH                                   | 0                                       | 0          | 1                                          | 2.4862        | 0(0-Inf)               |
| SYNDROME, PRE-EXCITATION                                     | 0                                       | 0          | 1                                          | 0.398         | 0(0-Inf)               |
| SYNDROME, PREMENSTRUAL--PMS                                  | 0                                       | 0          | 56                                         | 42.165        | 0(0-Inf)               |
| SYNDROME, PROLONGED Q. T. (FAMILIAL)                         | 0                                       | 0          | 24                                         | 13.5011       | 0(0-Inf)               |
| SYNDROME, PRONATOR                                           | 0                                       | 0          | 12                                         | 3.8249        | 0(0-Inf)               |
| SYNDROME, PSEUDOClaudication (SPINAL CORD)                   | 0                                       | 0          | 8                                          | 3.5419        | 0(0-Inf)               |
| SYNDROME, PYRIFORMIS                                         | 2                                       | 14.214     | 81                                         | 22.1969       | 0.6404(0.157-2.6121)   |
| SYNDROME, RADIAL TUNNEL                                      | 1                                       | 9.1956     | 7                                          | 1.7693        | 5.1974(0.6266-43.1086) |
| SYNDROME, RAEDER'S                                           | 0                                       | 0          | 1                                          | 0.4751        | 0(0-Inf)               |

| Description                                             | No. of Positive Cases with Disease Code | Case Rate* | No. of Positive Controls with Disease Code | Control Rate* | Relative Risk (95%CI)    |
|---------------------------------------------------------|-----------------------------------------|------------|--------------------------------------------|---------------|--------------------------|
| SYNDROME, RAMSAY HUNT                                   | 0                                       | 0          | 10                                         | 3.3124        | 0(0-Inf)                 |
| SYNDROME, RAYNAUD'S                                     | 0                                       | 0          | 43                                         | 10.5973       | 0(0-Inf)                 |
| SYNDROME, REITER'S                                      | 1                                       | 19.4343    | 8                                          | 3.8971        | 4.9868(0.6174-40.2823)   |
| SYNDROME, REPETITIVE (TRAUMA)-SEE ALSO OVERUSE SYNDROME | 0                                       | 0          | 1                                          | 0.2729        | 0(0-Inf)                 |
| SYNDROME, RESPIRATORY DISTRESS, CAUSE SPECIFIED         | 0                                       | 0          | 2                                          | 0.5458        | 0(0-Inf)                 |
| SYNDROME, RESPIRATORY DISTRESS, NEWBORN                 | 0                                       | 0          | 34                                         | 34.0733       | 0(0-Inf)                 |
| SYNDROME, RESPIRATORY DISTRESS, NOS--RDS (ADULT)        | 1                                       | 10.1094    | 38                                         | 19.2497       | 0.5252(0.0719-3.8356)    |
| SYNDROME, RESPIRATORY, OCCUPATIONAL                     | 0                                       | 0          | 1                                          | 2.4863        | 0(0-Inf)                 |
| SYNDROME, RESTLESS ARM                                  | 0                                       | 0          | 1                                          | 0.234         | 0(0-Inf)                 |
| SYNDROME, RESTLESS LEG                                  | 28                                      | 231.9855   | 799                                        | 293.9382      | 0.7892(0.5409-1.1515)    |
| SYNDROME, RETT'S                                        | 0                                       | 0          | 1                                          | 0.4048        | 0(0-Inf)                 |
| SYNDROME, RHOMBOID INSERTION                            | 0                                       | 0          | 2                                          | 0.432         | 0(0-Inf)                 |
| SYNDROME, RIB-TIP                                       | 0                                       | 0          | 1                                          | 2.4859        | 0(0-Inf)                 |
| SYNDROME, RICHTER'S--CODE ALSO LYMPHOMA, HISTIOCYTIC    | 0                                       | 0          | 1                                          | 0.4048        | 0(0-Inf)                 |
| SYNDROME, ROMBERG'S                                     | 0                                       | 0          | 2                                          | 0.7896        | 0(0-Inf)                 |
| SYNDROME, ROTATOR CUFF (DEGENERATIVE)                   | 17                                      | 153.5003   | 367                                        | 155.0096      | 0.9903(0.6081-1.6125)    |
| SYNDROME, RS3PE                                         | 0                                       | 0          | 1                                          | 0.2354        | 0(0-Inf)                 |
| SYNDROME, RUMINATION                                    | 0                                       | 0          | 2                                          | 0.5709        | 0(0-Inf)                 |
| SYNDROME, SALT-WASTING                                  | 0                                       | 0          | 2                                          | 1.7754        | 0(0-Inf)                 |
| SYNDROME, SALZMANN (EYE)                                | 0                                       | 0          | 2                                          | 0.8096        | 0(0-Inf)                 |
| SYNDROME, SCALDED SKIN                                  | 0                                       | 0          | 1                                          | 0.8527        | 0(0-Inf)                 |
| SYNDROME, SCALENUS ANTICUS, ANTERIOR                    | 0                                       | 0          | 1                                          | 0.398         | 0(0-Inf)                 |
| SYNDROME, SCAPHOID IMPACTION, WRIST (FRACTURE#)         | 0                                       | 0          | 1                                          | 0.398         | 0(0-Inf)                 |
| SYNDROME, SCHMIDT'S (ENDOCRINE)                         | 0                                       | 0          | 1                                          | 0.3526        | 0(0-Inf)                 |
| SYNDROME, SCIATICA                                      | 0                                       | 0          | 2                                          | 0.4681        | 0(0-Inf)                 |
| SYNDROME, SEZARY'S                                      | 0                                       | 0          | 2                                          | 0.4854        | 0(0-Inf)                 |
| SYNDROME, SHAKING LEG                                   | 0                                       | 0          | 2                                          | 0.8097        | 0(0-Inf)                 |
| SYNDROME, SHORT BOWEL                                   | 0                                       | 0          | 13                                         | 3.1739        | 0(0-Inf)                 |
| SYNDROME, SHOULDER GIRDLE                               | 0                                       | 0          | 1                                          | 0.2354        | 0(0-Inf)                 |
| SYNDROME, SHOULDER-HAND                                 | 0                                       | 0          | 13                                         | 3.9354        | 0(0-Inf)                 |
| SYNDROME, SHY-DRAGER                                    | 0                                       | 0          | 2                                          | 2.9786        | 0(0-Inf)                 |
| SYNDROME, SICCA                                         | 4                                       | 34.4489    | 108                                        | 42.9038       | 0.8029(0.2952-2.1838)    |
| SYNDROME, SICK SINUS                                    | 4                                       | 53.7088    | 124                                        | 95.8975       | 0.5601(0.2066-1.5179)    |
| SYNDROME, SINUS TARSI                                   | 1                                       | 12.7297    | 3                                          | 0.8153        | 15.6132(1.5758-154.7001) |
| SYNDROME, SJOGREN'S                                     | 3                                       | 21.6708    | 56                                         | 15.93         | 1.3604(0.4236-4.369)     |
| SYNDROME, SMALL STOMACH (POST-OP)                       | 0                                       | 0          | 1                                          | 0.8527        | 0(0-Inf)                 |
| SYNDROME, SNEDDON'S                                     | 0                                       | 0          | 1                                          | 2.4878        | 0(0-Inf)                 |
| SYNDROME, SPINAL FLUID                                  | 0                                       | 0          | 1                                          | 0.2354        | 0(0-Inf)                 |

| Description                                           | No. of Positive Cases with Disease Code | Case Rate* | No. of Positive Controls with Disease Code | Control Rate* | Relative Risk (95%CI)    |
|-------------------------------------------------------|-----------------------------------------|------------|--------------------------------------------|---------------|--------------------------|
| SYNDROME, SPLENIC FLEXURE                             | 0                                       | 0          | 16                                         | 4.0402        | 0(0-Inf)                 |
| SYNDROME, STEIN-LEVENTHAL                             | 0                                       | 0          | 1                                          | 0.234         | 0(0-Inf)                 |
| SYNDROME, STEVENS-JOHNSON                             | 0                                       | 0          | 4                                          | 0.952         | 0(0-Inf)                 |
| SYNDROME, STICKLER                                    | 0                                       | 0          | 1                                          | 1.0364        | 0(0-Inf)                 |
| SYNDROME, STIFF-MAN                                   | 0                                       | 0          | 1                                          | 0.234         | 0(0-Inf)                 |
| SYNDROME, STRAIGHT BACK                               | 0                                       | 0          | 2                                          | 0.5838        | 0(0-Inf)                 |
| SYNDROME, STRAINED VOICE                              | 0                                       | 0          | 2                                          | 0.8097        | 0(0-Inf)                 |
| SYNDROME, STRESS, BACK                                | 0                                       | 0          | 1                                          | 0.4048        | 0(0-Inf)                 |
| SYNDROME, STRESS, LOWER EXTREMITY                     | 0                                       | 0          | 34                                         | 8.0642        | 0(0-Inf)                 |
| SYNDROME, STRESS, NOS (OVERUSE#)                      | 0                                       | 0          | 3                                          | 0.6985        | 0(0-Inf)                 |
| SYNDROME, STRESS, UPPER EXTREMITY                     | 0                                       | 0          | 3                                          | 0.6986        | 0(0-Inf)                 |
| SYNDROME, STROKE, SLOW, NOS                           | 0                                       | 0          | 1                                          | 0.2354        | 0(0-Inf)                 |
| SYNDROME, STURGE-WEBER                                | 0                                       | 0          | 2                                          | 0.5908        | 0(0-Inf)                 |
| SYNDROME, SUBCLAVIAN STEAL                            | 1                                       | 10.6552    | 12                                         | 6.5632        | 1.6235(0.2095-12.5819)   |
| SYNDROME, SUNDOWNER                                   | 1                                       | 22.8239    | 13                                         | 20.855        | 1.0944(0.1428-8.3902)    |
| SYNDROME, SUPERIOR OBLIQUE TENDON SHEATH              | 0                                       | 0          | 1                                          | 0.4048        | 0(0-Inf)                 |
| SYNDROME, SUPERIOR VENA CAVA                          | 0                                       | 0          | 4                                          | 1.5792        | 0(0-Inf)                 |
| SYNDROME, SUPRASPINATUS                               | 1                                       | 11.4434    | 14                                         | 4.0385        | 2.8336(0.3688-21.7731)   |
| SYNDROME, SWEET'S                                     | 1                                       | 7.3857     | 3                                          | 0.9146        | 8.0756(0.8124-80.2713)   |
| SYNDROME, TACHYBRADYCARDIA                            | 7                                       | 94.5168    | 65                                         | 50.1896       | 1.8832(0.8608-4.1201)    |
| SYNDROME, TARSAL TUNNEL                               | 0                                       | 0          | 8                                          | 1.9344        | 0(0-Inf)                 |
| SYNDROME, TEMPOROMANDIBULAR JOINT                     | 2                                       | 13.8983    | 112                                        | 26.7703       | 0.5192(0.128-2.1065)     |
| SYNDROME, TENSOR FASCIA LATA                          | 0                                       | 0          | 2                                          | 0.4708        | 0(0-Inf)                 |
| SYNDROME, TERRIEN'S                                   | 0                                       | 0          | 1                                          | 0.234         | 0(0-Inf)                 |
| SYNDROME, TERSON'S                                    | 0                                       | 0          | 1                                          | 0.234         | 0(0-Inf)                 |
| SYNDROME, THALAMIC PAIN                               | 0                                       | 0          | 4                                          | 1.1818        | 0(0-Inf)                 |
| SYNDROME, THORACIC OUTLET COMPRESSION                 | 0                                       | 0          | 7                                          | 2.1012        | 0(0-Inf)                 |
| SYNDROME, THROMBOSIS (THROMBOTIC)                     | 0                                       | 0          | 1                                          | 0.4048        | 0(0-Inf)                 |
| SYNDROME, TIBIAL POSTERIOR                            | 0                                       | 0          | 2                                          | 0.4708        | 0(0-Inf)                 |
| SYNDROME, TIETZE'S                                    | 0                                       | 0          | 29                                         | 7.7012        | 0(0-Inf)                 |
| SYNDROME, TOXIC SHOCK                                 | 0                                       | 0          | 2                                          | 0.5838        | 0(0-Inf)                 |
| SYNDROME, TRACTION                                    | 0                                       | 0          | 3                                          | 1.1479        | 0(0-Inf)                 |
| SYNDROME, TRAPEZIUS                                   | 0                                       | 0          | 3                                          | 0.6548        | 0(0-Inf)                 |
| SYNDROME, TREACHER-COLLINS                            | 0                                       | 0          | 1                                          | 0.3526        | 0(0-Inf)                 |
| SYNDROME, TROUSSEAU'S                                 | 0                                       | 0          | 2                                          | 0.7896        | 0(0-Inf)                 |
| SYNDROME, TUMOR LYSIS (CODE ALSO EFFECT ADVERSE DRUG) | 1                                       | 7.1562     | 1                                          | 0.3094        | 23.1309(1.3934-383.9922) |
| SYNDROME, TURNER                                      | 1                                       | 7.7813     | 0                                          | 0             | 17349493289.3458(0-Inf)  |
| SYNDROME, TWO-FOOT-ONE HAND                           | 0                                       | 0          | 12                                         | 6.3808        | 0(0-Inf)                 |
| SYNDROME, TWO-HAND-ONE-FOOT                           | 0                                       | 0          | 1                                          | 0.2354        | 0(0-Inf)                 |
| SYNDROME, UHTHOFF'S                                   | 0                                       | 0          | 2                                          | 0.4681        | 0(0-Inf)                 |

| Description                                                     | No. of Positive Cases with Disease Code | Case Rate* | No. of Positive Controls with Disease Code | Control Rate* | Relative Risk (95%CI)    |
|-----------------------------------------------------------------|-----------------------------------------|------------|--------------------------------------------|---------------|--------------------------|
| SYNDROME, ULNAR-HAND                                            | 0                                       | 0          | 3                                          | 0.8018        | 0(0-Inf)                 |
| SYNDROME, UPPER AIRWAY RESISTANCE                               | 0                                       | 0          | 50                                         | 15.2546       | 0(0-Inf)                 |
| SYNDROME, USHER'S (RETINITIS PIGMENTOSA)                        | 0                                       | 0          | 1                                          | 0.8877        | 0(0-Inf)                 |
| SYNDROME, VASOVAGAL                                             | 2                                       | 14.0076    | 11                                         | 2.7754        | 5.047(1.1024-23.1059)    |
| SYNDROME, VENA CAVA                                             | 0                                       | 0          | 1                                          | 0.3526        | 0(0-Inf)                 |
| SYNDROME, VITREORETINOPATHY, (FAMILIAL) (EXUDATIVE)             | 0                                       | 0          | 7                                          | 3.0561        | 0(0-Inf)                 |
| SYNDROME, VITREOUS TRACTION                                     | 2                                       | 13.8921    | 10                                         | 2.4948        | 5.5684(1.1977-25.8885)   |
| SYNDROME, VOGT-KOYANAGI (EYE#)                                  | 1                                       | 22.4464    | 0                                          | 0             | 13885552305.178(0-Inf)   |
| SYNDROME, VOGT-KOYANAGI-HARADA (EYE#)                           | 1                                       | 11.4283    | 0                                          | 0             | 7488867505.8236(0-Inf)   |
| SYNDROME, WALLENBERG'S                                          | 1                                       | 9.2254     | 1                                          | 0.4532        | 20.3579(1.2317-336.4837) |
| SYNDROME, WARTENBERG'S                                          | 0                                       | 0          | 5                                          | 1.1873        | 0(0-Inf)                 |
| SYNDROME, WEGENER'S                                             | 1                                       | 7.4694     | 4                                          | 1.2606        | 5.9252(0.6455-54.3882)   |
| SYNDROME, WERNICKE-KORSAKOFF (ALCOHOLIC)                        | 0                                       | 0          | 1                                          | 0.8879        | 0(0-Inf)                 |
| SYNDROME, WERNICKE'S ALCOHOLIC                                  | 0                                       | 0          | 1                                          | 0.2729        | 0(0-Inf)                 |
| SYNDROME, WOLFF-PARKINSON-WHITE                                 | 0                                       | 0          | 29                                         | 7.7996        | 0(0-Inf)                 |
| SYNDROME, X (ANGINA#)                                           | 0                                       | 0          | 9                                          | 2.1528        | 0(0-Inf)                 |
| SYNDROME, X (CHROMOSOME#)                                       | 0                                       | 0          | 1                                          | 0.234         | 0(0-Inf)                 |
| SYNDROME, YELLOW NAIL                                           | 0                                       | 0          | 1                                          | 0.405         | 0(0-Inf)                 |
| SYNDROME, ZOLLINGER-ELLISON                                     | 0                                       | 0          | 2                                          | 0.4853        | 0(0-Inf)                 |
| SYNECHIA, ANTERIOR                                              | 0                                       | 0          | 1                                          | 0.234         | 0(0-Inf)                 |
| SYNECHIA, NASAL                                                 | 0                                       | 0          | 1                                          | 0.4048        | 0(0-Inf)                 |
| SYNECHIA, NOS (EYE#)-SEE ALSO ADHESION                          | 2                                       | 14.5654    | 12                                         | 3.5551        | 4.097(0.9039-18.5705)    |
| SYNECHIA, POSTERIOR                                             | 4                                       | 40.581     | 35                                         | 17.8373       | 2.2751(0.8038-6.4395)    |
| SYNERESIS (VITREOUS)                                            | 0                                       | 0          | 18                                         | 4.429         | 0(0-Inf)                 |
| SYNKINESIA (FACIAL)                                             | 0                                       | 0          | 2                                          | 0.8098        | 0(0-Inf)                 |
| SYNOSTOSIS, TIBIA-FIBULA (CONGENITAL#)                          | 0                                       | 0          | 1                                          | 0.4751        | 0(0-Inf)                 |
| SYNOVITIS, ANKLE                                                | 0                                       | 0          | 51                                         | 12.1215       | 0(0-Inf)                 |
| SYNOVITIS, ELBOW                                                | 0                                       | 0          | 17                                         | 4.2833        | 0(0-Inf)                 |
| SYNOVITIS, FINGER                                               | 4                                       | 31.6735    | 153                                        | 35.8181       | 0.8843(0.3269-2.3919)    |
| SYNOVITIS, FOOT                                                 | 1                                       | 7.4389     | 90                                         | 20.6733       | 0.3598(0.0501-2.5869)    |
| SYNOVITIS, HAND                                                 | 1                                       | 6.9527     | 87                                         | 22.1172       | 0.3144(0.0437-2.2612)    |
| SYNOVITIS, HIP                                                  | 6                                       | 42.261     | 51                                         | 13.4063       | 3.1523(1.3435-7.3966)    |
| SYNOVITIS, KNEE                                                 | 17                                      | 120.1518   | 432                                        | 110.9345      | 1.0831(0.6661-1.761)     |
| SYNOVITIS, NOS                                                  | 5                                       | 35.4731    | 104                                        | 28.333        | 1.252(0.5086-3.0817)     |
| SYNOVITIS, PIGMENTED VILLONODULAR (CODE ALSO SYNOVITIS BY SITE) | 0                                       | 0          | 7                                          | 1.7938        | 0(0-Inf)                 |
| SYNOVITIS, RHEUMATOID, CODE ALSO BY SITE STATED                 | 0                                       | 0          | 9                                          | 2.6967        | 0(0-Inf)                 |
| SYNOVITIS, SHOULDER                                             | 2                                       | 14.1637    | 46                                         | 12.6939       | 1.1158(0.2696-4.6182)    |
| SYNOVITIS, SILICONE, CODE ALSO BY SITE IF STATED                | 0                                       | 0          | 1                                          | 0.4048        | 0(0-Inf)                 |
| SYNOVITIS, SPINE                                                | 0                                       | 0          | 1                                          | 0.234         | 0(0-Inf)                 |

| Description                                            | No. of Positive Cases with Disease Code | Case Rate* | No. of Positive Controls with Disease Code | Control Rate* | Relative Risk (95%CI)   |
|--------------------------------------------------------|-----------------------------------------|------------|--------------------------------------------|---------------|-------------------------|
| SYNOVITIS, TOE                                         | 0                                       | 0          | 40                                         | 9.3075        | 0(0-Inf)                |
| SYNOVITIS, WRIST                                       | 5                                       | 34.8566    | 151                                        | 37.07         | 0.9403(0.3848-2.2977)   |
| SYPHILIS, LATE CONGENITAL, LATENT                      | 0                                       | 0          | 1                                          | 0.2354        | 0(0-Inf)                |
| SYPHILIS, LATE CONGENITAL, NOS                         | 0                                       | 0          | 1                                          | 1.0369        | 0(0-Inf)                |
| SYPHILIS, LATE, LATENT                                 | 0                                       | 0          | 3                                          | 0.6549        | 0(0-Inf)                |
| SYPHILIS, LATE, NOS                                    | 0                                       | 0          | 1                                          | 0.2729        | 0(0-Inf)                |
| SYPHILIS, LATENT, NOS                                  | 0                                       | 0          | 2                                          | 0.4709        | 0(0-Inf)                |
| SYPHILIS, NOS                                          | 0                                       | 0          | 2                                          | 0.5709        | 0(0-Inf)                |
| SYPHILIS, SKIN                                         | 0                                       | 0          | 1                                          | 0.2729        | 0(0-Inf)                |
| SYRINGADENOMA, NOS, CODE ALSO NEOPLASM, BENIGN BY SITE | 0                                       | 0          | 1                                          | 0.8878        | 0(0-Inf)                |
| SYRINGOCYSTADENOMA                                     | 0                                       | 0          | 4                                          | 1.0274        | 0(0-Inf)                |
| SYRINGOMA                                              | 2                                       | 14.2491    | 35                                         | 8.072         | 1.7653(0.4216-7.3917)   |
| SYRINGOMYELIA, CERVICAL                                | 0                                       | 0          | 3                                          | 0.7175        | 0(0-Inf)                |
| SYRINGOMYELIA, NOS                                     | 0                                       | 0          | 2                                          | 0.432         | 0(0-Inf)                |
| SYRINGOMYELIA, THORACIC                                | 0                                       | 0          | 2                                          | 0.4853        | 0(0-Inf)                |
| SYRINX, SPINAL, NOS                                    | 0                                       | 0          | 5                                          | 1.5553        | 0(0-Inf)                |
| SYRINX, THORACIC, ACQUIRED                             | 0                                       | 0          | 1                                          | 0.2729        | 0(0-Inf)                |
| TACHYARRHYTHMIA ( SEE ALSO TACHYCARDIA)                | 2                                       | 21.7835    | 61                                         | 34.58         | 0.6299(0.1537-2.5826)   |
| TACHYCARDIA, ATRIAL                                    | 12                                      | 125.0848   | 147                                        | 77.6496       | 1.6109(0.8921-2.9087)   |
| TACHYCARDIA, AURICULAR                                 | 0                                       | 0          | 2                                          | 1.8638        | 0(0-Inf)                |
| TACHYCARDIA, AV NODAL (RE-ENTRY)                       | 1                                       | 8.1024     | 28                                         | 10.0457       | 0.8066(0.1092-5.9576)   |
| TACHYCARDIA, NOS                                       | 18                                      | 158.7999   | 552                                        | 227.3306      | 0.6985(0.4364-1.1182)   |
| TACHYCARDIA, PAROXYSMAL                                | 8                                       | 56.5617    | 215                                        | 51.1503       | 1.1058(0.5447-2.2448)   |
| TACHYCARDIA, PAROXYSMAL SUPRAVENTRICULAR--PSVT         | 17                                      | 147.5145   | 426                                        | 166.8966      | 0.8839(0.5436-1.4371)   |
| TACHYCARDIA, PAROXYSMAL WITH SINUS BRADYCARDIA         | 0                                       | 0          | 1                                          | 0.889         | 0(0-Inf)                |
| TACHYCARDIA, PAROXYSMAL, ATRIAL--PAT                   | 11                                      | 77.6726    | 162                                        | 41.5896       | 1.8676(1.0108-3.4508)   |
| TACHYCARDIA, PAROXYSMAL, NODAL                         | 0                                       | 0          | 1                                          | 0.8881        | 0(0-Inf)                |
| TACHYCARDIA, PAROXYSMAL, SINUS                         | 0                                       | 0          | 1                                          | 0.8878        | 0(0-Inf)                |
| TACHYCARDIA, SINOAURICULAR                             | 0                                       | 0          | 1                                          | 0.405         | 0(0-Inf)                |
| TACHYCARDIA, SINUS                                     | 5                                       | 35.3194    | 134                                        | 36.0333       | 0.9802(0.4003-2.4)      |
| TACHYCARDIA, SUPRAVENTRICULAR                          | 24                                      | 179.7281   | 407                                        | 120.884       | 1.4868(0.9833-2.2482)   |
| TACHYCARDIA, VENTRICULAR                               | 15                                      | 142.3426   | 291                                        | 134.7528      | 1.0563(0.6277-1.7775)   |
| TACHYPNEA, CAUSE SPECIFIED                             | 0                                       | 0          | 3                                          | 3.9225        | 0(0-Inf)                |
| TACHYPNEA, NOS                                         | 1                                       | 15.4965    | 26                                         | 24.9682       | 0.6206(0.084-4.5863)    |
| TAG, ANAL--ATAG                                        | 7                                       | 49.1865    | 198                                        | 48.5815       | 1.0125(0.4754-2.1561)   |
| TAG, CUTANEOUS                                         | 3                                       | 26.8731    | 84                                         | 20.6904       | 1.2988(0.4092-4.1228)   |
| TAG, EPIPLOIC                                          | 0                                       | 0          | 5                                          | 1.7688        | 0(0-Inf)                |
| TAG, EPITHELIAL                                        | 3                                       | 22.9422    | 6                                          | 1.4983        | 15.3122(3.7398-62.6946) |
| TAG, FIBROEPITHELIAL, SKIN                             | 4                                       | 36.2644    | 72                                         | 18.2024       | 1.9923(0.7248-5.4765)   |

| Description                                                         | No. of Positive Cases with Disease Code | Case Rate* | No. of Positive Controls with Disease Code | Control Rate* | Relative Risk (95%CI)   |
|---------------------------------------------------------------------|-----------------------------------------|------------|--------------------------------------------|---------------|-------------------------|
| TAG, FIBROEPITHELIAL, VAGINA                                        | 0                                       | 0          | 8                                          | 1.7395        | 0(0-Inf)                |
| TAG, PERIANAL                                                       | 0                                       | 0          | 10                                         | 2.602         | 0(0-Inf)                |
| TAG, RECTAL                                                         | 0                                       | 0          | 6                                          | 1.4657        | 0(0-Inf)                |
| TAG, SENTINEL                                                       | 0                                       | 0          | 1                                          | 0.398         | 0(0-Inf)                |
| TAG, SKIN                                                           | 63                                      | 465.339    | 2155                                       | 557.0955      | 0.8353(0.6498-1.0738)   |
| TAG, TONSIL                                                         | 1                                       | 7.4311     | 7                                          | 1.6826        | 4.4163(0.5328-36.6081)  |
| TAG, URETHRA                                                        | 4                                       | 27.8549    | 58                                         | 14.2719       | 1.9517(0.7045-5.4069)   |
| TAG, VULVA                                                          | 0                                       | 0          | 8                                          | 1.8086        | 0(0-Inf)                |
| TALIPES, ACQUIRED                                                   | 0                                       | 0          | 1                                          | 0.398         | 0(0-Inf)                |
| TALIPES, CAVUS                                                      | 0                                       | 0          | 1                                          | 0.888         | 0(0-Inf)                |
| TALIPES, PLANOVALGUS                                                | 0                                       | 0          | 35                                         | 12.6491       | 0(0-Inf)                |
| TALIPES, PLANUS, NOS                                                | 0                                       | 0          | 2                                          | 0.432         | 0(0-Inf)                |
| TALIPES, VALGUS                                                     | 1                                       | 8.5839     | 13                                         | 5.1546        | 1.6653(0.2156-12.8606)  |
| TALIPES, VARUS                                                      | 0                                       | 0          | 1                                          | 0.8879        | 0(0-Inf)                |
| TALON NOIR                                                          | 0                                       | 0          | 1                                          | 0.2729        | 0(0-Inf)                |
| TAMPONADE, CARDIAC                                                  | 1                                       | 10.0452    | 19                                         | 9.5697        | 1.0497(0.1398-7.8834)   |
| TAMPONADE, PERICARDIAL                                              | 1                                       | 8.8345     | 15                                         | 6.2469        | 1.4142(0.1854-10.7866)  |
| TARSAL BOSSU                                                        | 1                                       | 10.5597    | 8                                          | 2.0226        | 5.2208(0.6415-42.4906)  |
| TARTAR (TEETH)                                                      | 0                                       | 0          | 2                                          | 0.5837        | 0(0-Inf)                |
| TATTOO, DENTAL (AMALGAM)                                            | 1                                       | 7.2755     | 16                                         | 4.7265        | 1.5393(0.2023-11.7109)  |
| TATTOO, NOS (SKIN)                                                  | 1                                       | 7.7        | 20                                         | 5.1379        | 1.4987(0.1999-11.2365)  |
| TEAR, ACETABULAR LABRUM (LIP)(HIP#)                                 | 0                                       | 0          | 1                                          | 0.3526        | 0(0-Inf)                |
| TEAR, ANAL (NONTRAUMATIC)                                           | 1                                       | 8.4839     | 2                                          | 0.5671        | 14.961(1.3177-169.8623) |
| TEAR, ANAL SPHINCTER (NONTRAUMATIC)-SEE ALSO PERINEUM WITH DELIVERY | 0                                       | 0          | 1                                          | 0.2354        | 0(0-Inf)                |
| TEAR, CAPSULE, JOINT, CODE ALSO RUPTURE LIGAMENT BY SITE            | 1                                       | 7.6012     | 13                                         | 3.1405        | 2.4204(0.313-18.7166)   |
| TEAR, CARTILAGE, NOS, CODE ALSO RUPTURE, LIGAMENT BY SITE           | 0                                       | 0          | 22                                         | 5.2475        | 0(0-Inf)                |
| TEAR, CHOROID                                                       | 0                                       | 0          | 1                                          | 0.4751        | 0(0-Inf)                |
| TEAR, GLENOIDALE LABRUM (SHOULDER INJURY#)                          | 0                                       | 0          | 6                                          | 1.8809        | 0(0-Inf)                |
| TEAR, HORSESHOE, RETINA                                             | 2                                       | 14.0328    | 132                                        | 35.7897       | 0.3921(0.0969-1.5868)   |
| TEAR, INTERNAL ORGAN, SEE ALSO INJURY, INTERNAL BY SITE             | 0                                       | 0          | 1                                          | 1.9072        | 0(0-Inf)                |
| TEAR, LIGAMENT, SEE ALSO RUPTURE, LIGAMENT BY SITE                  | 0                                       | 0          | 3                                          | 0.741         | 0(0-Inf)                |
| TEAR, MENISCUS, BUCKET HANDLE                                       | 2                                       | 23.3118    | 37                                         | 11.6826       | 1.9954(0.4786-8.3203)   |
| TEAR, MENISCUS, DEGENERATIVE-SEE ALSO DERANGEMENT                   | 13                                      | 95.1637    | 432                                        | 128.3527      | 0.7414(0.4265-1.2889)   |
| TEAR, MENISCUS, HORIZONTAL                                          | 0                                       | 0          | 15                                         | 3.7117        | 0(0-Inf)                |
| TEAR, MENISCUS, KNEE, OLD                                           | 4                                       | 29.9002    | 161                                        | 38.9234       | 0.7682(0.2843-2.0759)   |
| TEAR, MENISCUS, NOS                                                 | 13                                      | 93.7813    | 572                                        | 142.7395      | 0.657(0.3788-1.1396)    |
| TEAR, MENISCUS, PARROT'S BEAK                                       | 0                                       | 0          | 3                                          | 1.0729        | 0(0-Inf)                |
| TEAR, MENISCUS, PERIPHERAL DETACHMENT                               | 0                                       | 0          | 1                                          | 0.234         | 0(0-Inf)                |

| Description                                              | No. of Positive Cases with Disease Code | Case Rate* | No. of Positive Controls with Disease Code | Control Rate* | Relative Risk (95%CI)  |
|----------------------------------------------------------|-----------------------------------------|------------|--------------------------------------------|---------------|------------------------|
| TEAR, MENISCUS, TRAUMATIC, OLD/LATE EFFECT               | 0                                       | 0          | 23                                         | 5.677         | 0(0-Inf)               |
| TEAR, MUSCLE, SEE ALSO RUPTURE, MUSCLE BY SITE           | 0                                       | 0          | 4                                          | 1.0588        | 0(0-Inf)               |
| TEAR, RETINAL                                            | 4                                       | 28.0092    | 151                                        | 39.9929       | 0.7004(0.259-1.8941)   |
| TEAR, ROTATOR CUFF, (NONTRAUMATIC), NOS                  | 30                                      | 254.0664   | 833                                        | 317.0107      | 0.8014(0.5563-1.1545)  |
| TEAR, ROTATOR CUFF, TRAUMATIC                            | 9                                       | 63.3133    | 163                                        | 44.1183       | 1.4351(0.7318-2.8141)  |
| TEAR, ROTATOR CUFF, TRAUMATIC OLD/LATE EFFECT            | 5                                       | 37.3077    | 82                                         | 25.6964       | 1.4519(0.5865-3.5938)  |
| TEAR, TENDON, CODE ALSO RUPTURE, MUSCLE BY SITE          | 2                                       | 13.9437    | 94                                         | 25.2121       | 0.5531(0.136-2.249)    |
| TELANGIECTASIA, CONGENITAL                               | 0                                       | 0          | 1                                          | 0.398         | 0(0-Inf)               |
| TELANGIECTASIA, HEAD OR NECK                             | 7                                       | 48.7277    | 209                                        | 51.506        | 0.9461(0.4446-2.0132)  |
| TELANGIECTASIA, HEMORRHAGIC, HEREDITARY                  | 0                                       | 0          | 4                                          | 0.9237        | 0(0-Inf)               |
| TELANGIECTASIA, HEMORRHAGIC, NOS                         | 0                                       | 0          | 5                                          | 1.1414        | 0(0-Inf)               |
| TELANGIECTASIA, HEREDITARY                               | 0                                       | 0          | 4                                          | 0.9158        | 0(0-Inf)               |
| TELANGIECTASIA, LOWER EXTREMITY                          | 0                                       | 0          | 37                                         | 8.832         | 0(0-Inf)               |
| TELANGIECTASIA, NOS                                      | 12                                      | 84.4139    | 451                                        | 109.8591      | 0.7684(0.4326-1.365)   |
| TELANGIECTASIA, RETINA                                   | 0                                       | 0          | 7                                          | 1.9653        | 0(0-Inf)               |
| TELANGIECTASIA, TRUNK                                    | 0                                       | 0          | 26                                         | 11.8154       | 0(0-Inf)               |
| TELANGIECTASIA, UPPER EXTREMITY                          | 0                                       | 0          | 5                                          | 1.526         | 0(0-Inf)               |
| TELOGEN EFFLUVIUM                                        | 1                                       | 13.8801    | 28                                         | 13.9658       | 0.9939(0.1343-7.3536)  |
| TEMPER TANTRUM                                           | 0                                       | 0          | 1                                          | 0.2729        | 0(0-Inf)               |
| TENDENCY, BLEEDING                                       | 0                                       | 0          | 1                                          | 0.2354        | 0(0-Inf)               |
| TENDENCY, BRUISING                                       | 3                                       | 23.0348    | 150                                        | 48.6936       | 0.4731(0.1506-1.4861)  |
| TENDENCY, SUICIDAL                                       | 0                                       | 0          | 19                                         | 9.2347        | 0(0-Inf)               |
| TENDERNESS, ABDOMINAL                                    | 1                                       | 7.2754     | 33                                         | 9.578         | 0.7596(0.1034-5.5817)  |
| TENDERNESS, LIVER                                        | 0                                       | 0          | 3                                          | 0.871         | 0(0-Inf)               |
| TENDERNESS, TROCHANTERIC                                 | 3                                       | 26.5465    | 43                                         | 17.8772       | 1.4849(0.4583-4.8112)  |
| TENDINITIS / TENDONITIS (SEE TENOSYNOVITIS)              | 8                                       | 55.7603    | 299                                        | 74.1435       | 0.7521(0.372-1.5202)   |
| TENDONOPATHY (TENDINOPATHY)                              | 5                                       | 40.9279    | 299                                        | 109.6768      | 0.3732(0.1541-0.9039)  |
| TENESMUS                                                 | 1                                       | 6.9548     | 8                                          | 2.0739        | 3.3535(0.4122-27.2855) |
| TENNIS ELBOW (OTHER JOINTS CODE SYNDROME STRESS BY SITE) | 2                                       | 24.8185    | 240                                        | 74.6357       | 0.3325(0.0826-1.3385)  |
| TENONITIS ORBIT                                          | 0                                       | 0          | 1                                          | 0.234         | 0(0-Inf)               |
| TENOSYNOVITIS, ACHILLES                                  | 11                                      | 78.8845    | 216                                        | 60.5516       | 1.3028(0.7092-2.3932)  |
| TENOSYNOVITIS, ADDUCTOR                                  | 4                                       | 32.0902    | 49                                         | 17.1647       | 1.8695(0.6709-5.2098)  |
| TENOSYNOVITIS, ANKLE                                     | 15                                      | 113.3986   | 310                                        | 73.1679       | 1.5498(0.9212-2.6075)  |
| TENOSYNOVITIS, ANTERIOR TIBIAL                           | 1                                       | 7.4497     | 27                                         | 8.2555        | 0.9024(0.1219-6.6786)  |
| TENOSYNOVITIS, BICIPITAL/BICEPS                          | 43                                      | 318.7763   | 1243                                       | 311.6782      | 1.0228(0.754-1.3874)   |
| TENOSYNOVITIS, BUTTOCK                                   | 3                                       | 20.8539    | 78                                         | 19.1895       | 1.0867(0.3417-3.4561)  |
| TENOSYNOVITIS, CALCAREOUS (CODE ALSO BY SITE)            | 0                                       | 0          | 1                                          | 0.2354        | 0(0-Inf)               |
| TENOSYNOVITIS, CALCIFIC (CODE ALSO BY SITE)              | 9                                       | 67.1206    | 181                                        | 43.2553       | 1.5517(0.7925-3.0385)  |
| TENOSYNOVITIS, CREPITANS (CODE ALSO BY SITE)             | 0                                       | 0          | 2                                          | 1.1975        | 0(0-Inf)               |



| Description                                      | No. of Positive Cases with Disease Code | Case Rate* | No. of Positive Controls with Disease Code | Control Rate* | Relative Risk (95%CI)   |
|--------------------------------------------------|-----------------------------------------|------------|--------------------------------------------|---------------|-------------------------|
| TENOSYNOVITIS, DE QUERVAIN'S                     | 6                                       | 42.0257    | 261                                        | 61.0984       | 0.6878(0.3057-1.5479)   |
| TENOSYNOVITIS, DEGENERATIVE (CODE ALSO BY SITE)  | 2                                       | 15.2962    | 45                                         | 10.573        | 1.4467(0.3491-5.9951)   |
| TENOSYNOVITIS, DELTOID                           | 0                                       | 0          | 16                                         | 4.3676        | 0(0-Inf)                |
| TENOSYNOVITIS, ELBOW                             | 3                                       | 25.6068    | 101                                        | 25.9687       | 0.9861(0.312-3.1168)    |
| TENOSYNOVITIS, FINGER                            | 15                                      | 108.3867   | 467                                        | 129.9227      | 0.8342(0.4983-1.3968)   |
| TENOSYNOVITIS, FLEXOR CARPI RADIALIS             | 1                                       | 7.0918     | 40                                         | 10.8677       | 0.6526(0.0893-4.7667)   |
| TENOSYNOVITIS, FLEXOR CARPI ULNARIS              | 0                                       | 0          | 19                                         | 4.557         | 0(0-Inf)                |
| TENOSYNOVITIS, FOOT                              | 3                                       | 21.1378    | 231                                        | 54.841        | 0.3854(0.1232-1.2055)   |
| TENOSYNOVITIS, HAMSTRING                         | 1                                       | 6.9367     | 21                                         | 5.2435        | 1.3229(0.1765-9.9176)   |
| TENOSYNOVITIS, HAND                              | 8                                       | 55.898     | 169                                        | 41.9744       | 1.3317(0.6535-2.7137)   |
| TENOSYNOVITIS, HIP                               | 8                                       | 56.15      | 182                                        | 45.6253       | 1.2307(0.6047-2.5047)   |
| TENOSYNOVITIS, ILIAC CREST                       | 0                                       | 0          | 2                                          | 4.9725        | 0(0-Inf)                |
| TENOSYNOVITIS, ILIOPSOAS                         | 1                                       | 8.0729     | 2                                          | 0.7121        | 11.3373(0.985-130.4897) |
| TENOSYNOVITIS, KNEE                              | 4                                       | 28.9951    | 248                                        | 59.3319       | 0.4887(0.1817-1.3142)   |
| TENOSYNOVITIS, LOWER EXTREMITY NEC               | 9                                       | 65.1035    | 120                                        | 33.9675       | 1.9166(0.9699-3.7874)   |
| TENOSYNOVITIS, NOS                               | 9                                       | 63.7999    | 222                                        | 52.9416       | 1.2051(0.6174-2.3521)   |
| TENOSYNOVITIS, PERONEAL                          | 2                                       | 14.9231    | 90                                         | 20.6102       | 0.7241(0.1778-2.9483)   |
| TENOSYNOVITIS, POSTERIOR TIBIAL                  | 4                                       | 28.1143    | 149                                        | 39.0785       | 0.7194(0.2659-1.9466)   |
| TENOSYNOVITIS, PURULENT (CODE ALSO BY SITE)      | 0                                       | 0          | 3                                          | 1.3868        | 0(0-Inf)                |
| TENOSYNOVITIS, RHEUMATOID (CODE ALSO BY SITE)    | 1                                       | 8.2252     | 4                                          | 0.877         | 9.3792(1.0127-86.8632)  |
| TENOSYNOVITIS, ROTATOR CUFF                      | 56                                      | 470.7507   | 1869                                       | 699.1538      | 0.6733(0.5159-0.8788)   |
| TENOSYNOVITIS, SEPTIC (CODE ALSO BY SITE STATED) | 0                                       | 0          | 8                                          | 2.4463        | 0(0-Inf)                |
| TENOSYNOVITIS, SHOULDER                          | 41                                      | 305.7566   | 1312                                       | 331.5754      | 0.9221(0.6752-1.2593)   |
| TENOSYNOVITIS, SHOULDER, ADHESIVE                | 0                                       | 0          | 2                                          | 0.5475        | 0(0-Inf)                |
| TENOSYNOVITIS, SPINE, CERVICAL                   | 0                                       | 0          | 3                                          | 0.7175        | 0(0-Inf)                |
| TENOSYNOVITIS, SPINE, LUMBAR                     | 0                                       | 0          | 2                                          | 0.8102        | 0(0-Inf)                |
| TENOSYNOVITIS, SPINE, NOS                        | 0                                       | 0          | 5                                          | 1.2018        | 0(0-Inf)                |
| TENOSYNOVITIS, SPINE, SACRAL                     | 0                                       | 0          | 2                                          | 0.5908        | 0(0-Inf)                |
| TENOSYNOVITIS, SPINE, THORACIC                   | 0                                       | 0          | 1                                          | 0.234         | 0(0-Inf)                |
| TENOSYNOVITIS, STENOSANS (CODE ALSO BY SITE)     | 0                                       | 0          | 1                                          | 0.234         | 0(0-Inf)                |
| TENOSYNOVITIS, STENOSING (CODE ALSO BY SITE)     | 9                                       | 65.6765    | 395                                        | 115.1019      | 0.5706(0.2943-1.1061)   |
| TENOSYNOVITIS, SUBACROMIAL                       | 0                                       | 0          | 11                                         | 4.6942        | 0(0-Inf)                |
| TENOSYNOVITIS, SUPPURATIVE (CODE ALSO BY SITE)   | 0                                       | 0          | 1                                          | 0.234         | 0(0-Inf)                |
| TENOSYNOVITIS, SUPRASPINATUS                     | 2                                       | 14.3512    | 128                                        | 36.6573       | 0.3915(0.0967-1.585)    |
| TENOSYNOVITIS, THUMB                             | 7                                       | 49.1915    | 249                                        | 59.1977       | 0.831(0.3913-1.7645)    |
| TENOSYNOVITIS, TOE                               | 0                                       | 0          | 21                                         | 4.7903        | 0(0-Inf)                |
| TENOSYNOVITIS, TRAUMATIC (CODE ALSO BY SITE)     | 2                                       | 15.4638    | 30                                         | 7.131         | 2.1685(0.5144-9.1426)   |
| TENOSYNOVITIS, TRICEPS                           | 0                                       | 0          | 3                                          | 0.8115        | 0(0-Inf)                |
| TENOSYNOVITIS, UPPER EXTREMITY NEC               | 3                                       | 20.8445    | 73                                         | 17.9675       | 1.1601(0.3642-3.6957)   |
| TENOSYNOVITIS, VASTUS LATERALIS                  | 0                                       | 0          | 1                                          | 0.2354        | 0(0-Inf)                |

| Description                                          | No. of Positive Cases with Disease Code | Case Rate* | No. of Positive Controls with Disease Code | Control Rate* | Relative Risk (95%CI)    |
|------------------------------------------------------|-----------------------------------------|------------|--------------------------------------------|---------------|--------------------------|
| TENOSYNOVITIS, WRIST NEC                             | 1                                       | 6.9703     | 81                                         | 19.2531       | 0.362(0.0503-2.6072)     |
| TENOSYNOVITIS, WRIST NOS                             | 15                                      | 111.6572   | 353                                        | 82.2705       | 1.3572(0.808-2.2796)     |
| TENSION, CHECK (EYE EXAM)                            | 1                                       | 18.5229    | 8                                          | 9.1231        | 2.0303(0.2524-16.3308)   |
| TENSION, INTRAOCULAR, BORDERLINE                     | 0                                       | 0          | 47                                         | 11.467        | 0(0-Inf)                 |
| TENSION, MUSCLE                                      | 1                                       | 7.0826     | 46                                         | 10.6736       | 0.6636(0.0911-4.8307)    |
| TENSION, NERVOUS--TN                                 | 41                                      | 470.7097   | 1050                                       | 298.3902      | 1.5775(1.1535-2.1573)    |
| TENSION, PREMENSTRUAL                                | 0                                       | 0          | 71                                         | 73.4082       | 0(0-Inf)                 |
| TERATOCARCINOMA CODE ALSO NEOPLASM MALIGNANT BY SITE | 0                                       | 0          | 1                                          | 2.486         | 0(0-Inf)                 |
| TERATOMA, OVARY                                      | 0                                       | 0          | 17                                         | 8.9459        | 0(0-Inf)                 |
| TEST, ALLERGY                                        | 0                                       | 0          | 52                                         | 11.957        | 0(0-Inf)                 |
| TEST, BASAL METABOLIC RATE                           | 0                                       | 0          | 1                                          | 0.234         | 0(0-Inf)                 |
| TEST, BLOOD                                          | 124                                     | 976.0153   | 3280                                       | 955.9986      | 1.0209(0.8529-1.2221)    |
| TEST, BLOOD DONOR, ABNORMAL                          | 3                                       | 21.51      | 158                                        | 38.6779       | 0.5561(0.1771-1.7459)    |
| TEST, CHALLENGE-DELIBERATE                           | 0                                       | 0          | 15                                         | 5.8938        | 0(0-Inf)                 |
| TEST, COOMBS' (POSITIVE)                             | 1                                       | 7.457      | 8                                          | 1.9469        | 3.8303(0.4711-31.1427)   |
| TEST, GENETICS (MAIL IN)                             | 0                                       | 0          | 3                                          | 1.902         | 0(0-Inf)                 |
| TEST, GLUCOSE TOLERANCE                              | 0                                       | 0          | 7                                          | 2.2774        | 0(0-Inf)                 |
| TEST, HEPATITIS B ANTIGEN POSITIVE                   | 0                                       | 0          | 1                                          | 0.3526        | 0(0-Inf)                 |
| TEST, HYPERSENSITIVITY                               | 0                                       | 0          | 46                                         | 12.0563       | 0(0-Inf)                 |
| TEST, LABORATORY, NEGATIVE                           | 42                                      | 303.0918   | 1121                                       | 282.7555      | 1.0719(0.787-1.46)       |
| TEST, LABORATORY, NOS                                | 397                                     | 4583.054   | 11952                                      | 6558.0855     | 0.6988(0.6322-0.7725)    |
| TEST, LABORATORY, POSITIVE                           | 7                                       | 61.9057    | 127                                        | 52.7907       | 1.1727(0.5466-2.5159)    |
| TEST, MANTOUX                                        | 0                                       | 0          | 3                                          | 0.7022        | 0(0-Inf)                 |
| TEST, METHACHOLINE CHALLENGE (POSITIVE OR ABNORMAL)  | 0                                       | 0          | 10                                         | 2.7438        | 0(0-Inf)                 |
| TEST, PPD                                            | 0                                       | 0          | 4                                          | 2.4126        | 0(0-Inf)                 |
| TEST, PREGNANCY-SEE ALSO EXAM                        | 0                                       | 0          | 1                                          | 0.234         | 0(0-Inf)                 |
| TEST, SCHICK                                         | 0                                       | 0          | 1                                          | 6.5341        | 0(0-Inf)                 |
| TEST, SEROLOGY (SYPHILITIC)                          | 1                                       | 7.028      | 1                                          | 0.265         | 26.5217(1.5972-440.3848) |
| TEST, SKIN, NEC                                      | 0                                       | 0          | 25                                         | 5.652         | 0(0-Inf)                 |
| TEST, SPECIAL, NEC                                   | 2                                       | 23.2366    | 26                                         | 8.2167        | 2.828(0.6666-11.9965)    |
| TEST, SYPHILITIC                                     | 0                                       | 0          | 1                                          | 0.2354        | 0(0-Inf)                 |
| TEST, TINE                                           | 0                                       | 0          | 2                                          | 0.7961        | 0(0-Inf)                 |
| TEST, TUBERCULIN                                     | 2                                       | 15.102     | 33                                         | 7.6975        | 1.9619(0.4674-8.2355)    |
| TETANY, NOS                                          | 0                                       | 0          | 2                                          | 1.1975        | 0(0-Inf)                 |
| TETHERED SPINAL CORD                                 | 0                                       | 0          | 1                                          | 0.2354        | 0(0-Inf)                 |
| TETRALOGY OF FALLOT                                  | 0                                       | 0          | 1                                          | 0.2729        | 0(0-Inf)                 |
| TETRAPLEGIA (SEE ALSO QUADRIPLEGIA)                  | 0                                       | 0          | 7                                          | 1.6653        | 0(0-Inf)                 |
| TETRAPLOID                                           | 0                                       | 0          | 4                                          | 2.7547        | 0(0-Inf)                 |
| THALASSEMIA, ALPHA                                   | 0                                       | 0          | 1                                          | 0.2354        | 0(0-Inf)                 |
| THALASSEMIA, BETA MINOR                              | 0                                       | 0          | 6                                          | 1.6494        | 0(0-Inf)                 |

| Description                                                                | No. of Positive Cases with Disease Code | Case Rate* | No. of Positive Controls with Disease Code | Control Rate* | Relative Risk (95%CI)  |
|----------------------------------------------------------------------------|-----------------------------------------|------------|--------------------------------------------|---------------|------------------------|
| THALASSEMIA, BETA TRAIT                                                    | 0                                       | 0          | 3                                          | 0.7175        | 0(0-Inf)               |
| THALASSEMIA, BETA, NOS                                                     | 0                                       | 0          | 1                                          | 0.234         | 0(0-Inf)               |
| THALASSEMIA, NOS                                                           | 0                                       | 0          | 3                                          | 0.8018        | 0(0-Inf)               |
| THERAPY, ALLERGY                                                           | 6                                       | 126.6937   | 158                                        | 69.3312       | 1.8274(0.8071-4.1376)  |
| THERAPY, ANTI-COAGULANT                                                    | 3                                       | 31.6804    | 27                                         | 14.5986       | 2.1701(0.6546-7.1938)  |
| THERAPY, ANTI-DIARRHEAL                                                    | 0                                       | 0          | 1                                          | 0.4048        | 0(0-Inf)               |
| THERAPY, ANTI-HORMONAL                                                     | 0                                       | 0          | 8                                          | 4.4687        | 0(0-Inf)               |
| THERAPY, BIOFEEDBACK                                                       | 1                                       | 16.8803    | 10                                         | 3.5578        | 4.7446(0.6003-37.5002) |
| THERAPY, BLOOD TRANSFUSION                                                 | 5                                       | 59.3882    | 92                                         | 59.562        | 0.9971(0.4044-2.4582)  |
| THERAPY, CHEMOTHERAPY                                                      | 24                                      | 172.0276   | 485                                        | 135.4258      | 1.2703(0.8418-1.9168)  |
| THERAPY, COBALT                                                            | 0                                       | 0          | 31                                         | 7.9659        | 0(0-Inf)               |
| THERAPY, COLLAGEN INJECTION                                                | 0                                       | 0          | 12                                         | 5.5325        | 0(0-Inf)               |
| THERAPY, CORTICOSTEROID, INJECTABLE (COMPOUND F)                           | 180                                     | 1618.273   | 4855                                       | 1462.5812     | 1.1064(0.9531-1.2845)  |
| THERAPY, CPAP                                                              | 4                                       | 32.6341    | 151                                        | 56.1792       | 0.5809(0.2149-1.5701)  |
| THERAPY, DIET                                                              | 24                                      | 203.487    | 1128                                       | 277.996       | 0.732(0.4882-1.0975)   |
| THERAPY, DIURETIC                                                          | 1                                       | 7.3091     | 6                                          | 1.756         | 4.1623(0.4893-35.4036) |
| THERAPY, ELECTRIC SHOCK                                                    | 1                                       | 9.0014     | 35                                         | 14.9222       | 0.6032(0.0823-4.4195)  |
| THERAPY, ERYTHROPOIETIN                                                    | 4                                       | 41.3799    | 33                                         | 17.3139       | 2.39(0.8418-6.7852)    |
| THERAPY, FOLIC ACID                                                        | 1                                       | 11.2423    | 0                                          | 0             | 7470763441.3135(0-Inf) |
| THERAPY, HOME PARENTERAL NUTRITION-HPN OR CPN                              | 0                                       | 0          | 7                                          | 4.4916        | 0(0-Inf)               |
| THERAPY, HORMONAL                                                          | 18                                      | 134.6682   | 591                                        | 179.5524      | 0.75(0.4687-1.2001)    |
| THERAPY, IMMUNOTHERAPY (BCG) (INTERFERON)                                  | 3                                       | 22.9053    | 79                                         | 25.9545       | 0.8825(0.2778-2.8033)  |
| THERAPY, INJECTION, DEPO-PROVERA                                           | 0                                       | 0          | 4                                          | 1.6201        | 0(0-Inf)               |
| THERAPY, INSULIN, NOT OTHERWISE CODED                                      | 23                                      | 210.7598   | 535                                        | 233.6331      | 0.9021(0.5937-1.3708)  |
| THERAPY, IRIIDIUM                                                          | 0                                       | 0          | 7                                          | 2.5177        | 0(0-Inf)               |
| THERAPY, LINAC / C-LINAC                                                   | 18                                      | 134.4315   | 575                                        | 178.5497      | 0.7529(0.4705-1.2049)  |
| THERAPY, MECHANICAL VENTILATION, NOS--RXM                                  | 14                                      | 120.2518   | 244                                        | 95.6319       | 1.2574(0.7324-2.1588)  |
| THERAPY, MECHANICAL, VENTILATION, PROLONGED--RXMP                          | 3                                       | 23.4477    | 45                                         | 15.128        | 1.55(0.4792-5.0133)    |
| THERAPY, NEC                                                               | 11                                      | 92.2539    | 288                                        | 109.8929      | 0.8395(0.4591-1.5351)  |
| THERAPY, NOS                                                               | 5                                       | 39.1407    | 119                                        | 40.1239       | 0.9755(0.3976-2.3933)  |
| THERAPY, ORTHODONTIC, COMPLETED, NOS                                       | 3                                       | 46.4233    | 98                                         | 31.9752       | 1.4519(0.4591-4.591)   |
| THERAPY, ORTHODONTICS                                                      | 3                                       | 22.7434    | 48                                         | 10.8959       | 2.0873(0.6461-6.7438)  |
| THERAPY, PHLEBOTOMY                                                        | 0                                       | 0          | 8                                          | 4.4729        | 0(0-Inf)               |
| THERAPY, PHYSICAL MEDICINE AND REHABILITATION (PHYSIATRICALS)(PHYSIATRIST) | 384                                     | 4952.109   | 9607                                       | 3987.8343     | 1.2418(1.121-1.3756)   |
| THERAPY, PROPHYLACTIC (PROPHYLAXIS)                                        | 11                                      | 112.2094   | 476                                        | 246.2057      | 0.4558(0.2505-0.8292)  |
| THERAPY, PSYCHOTHERAPY (IPC)                                               | 11                                      | 123.2045   | 554                                        | 158.1701      | 0.7789(0.4285-1.4161)  |
| THERAPY, RADIATION                                                         | 20                                      | 157.1923   | 434                                        | 148.6569      | 1.0574(0.6745-1.6578)  |
| THERAPY, RADIATION, ELECTRON                                               | 1                                       | 6.9261     | 113                                        | 26.8381       | 0.2581(0.036-1.8512)   |

| Description                                    | No. of Positive Cases with Disease Code | Case Rate* | No. of Positive Controls with Disease Code | Control Rate* | Relative Risk (95%CI)  |
|------------------------------------------------|-----------------------------------------|------------|--------------------------------------------|---------------|------------------------|
| THERAPY, RADIOACTIVE GOLD                      | 0                                       | 0          | 2                                          | 0.8723        | 0(0-Inf)               |
| THERAPY, RADIOACTIVE IODINE                    | 3                                       | 21.301     | 143                                        | 33.1789       | 0.642(0.2042-2.0187)   |
| THERAPY, RADIOACTIVE IODINE SEEDS (I 125)      | 0                                       | 0          | 4                                          | 1.0273        | 0(0-Inf)               |
| THERAPY, RADIOACTIVE PHOSPHORUS (P32)          | 0                                       | 0          | 6                                          | 2.767         | 0(0-Inf)               |
| THERAPY, RADIUM                                | 0                                       | 0          | 8                                          | 1.9049        | 0(0-Inf)               |
| THERAPY, RUBRAMIN (VITAMIN B 12)               | 0                                       | 0          | 17                                         | 11.6937       | 0(0-Inf)               |
| THERAPY, SCLEROTHERAPY                         | 5                                       | 35.0131    | 110                                        | 24.9406       | 1.4039(0.5707-3.4533)  |
| THERAPY, SPEECH                                | 0                                       | 0          | 21                                         | 9.3253        | 0(0-Inf)               |
| THERAPY, STOMAL                                | 1                                       | 9.8946     | 40                                         | 19.6833       | 0.5027(0.0689-3.6669)  |
| THERAPY, STREPTOKINASE, SEE ALSO STATUS        | 0                                       | 0          | 1                                          | 0.2729        | 0(0-Inf)               |
| THERAPY, THIOTEPA                              | 2                                       | 16.4007    | 15                                         | 5.5419        | 2.9594(0.6702-13.0686) |
| THERAPY, VARICOSE VEIN INJECTION               | 7                                       | 88.4281    | 139                                        | 38.0589       | 2.3235(1.0846-4.9773)  |
| THERAPY, VEIN                                  | 7                                       | 105.8658   | 169                                        | 54.5426       | 1.941(0.9095-4.1424)   |
| THERAPY, VITAMIN                               | 0                                       | 0          | 19                                         | 9.4635        | 0(0-Inf)               |
| THICKENING, BREAST                             | 1                                       | 6.9123     | 25                                         | 5.7899        | 1.1939(0.1605-8.8781)  |
| THICKENING, HEART, SEE ALSO ENDOCARDITIS       | 0                                       | 0          | 1                                          | 0.4048        | 0(0-Inf)               |
| THICKENING, LARYNX                             | 0                                       | 0          | 4                                          | 1.0302        | 0(0-Inf)               |
| THICKENING, LUNG, PLEURAL                      | 1                                       | 7.9182     | 50                                         | 17.6782       | 0.4479(0.0617-3.2491)  |
| THICKENING, NAIL                               | 0                                       | 0          | 39                                         | 12.4533       | 0(0-Inf)               |
| THICKENING, SINUS, SEE ALSO SINUSITIS          | 0                                       | 0          | 4                                          | 1.3219        | 0(0-Inf)               |
| THICKENING, SKIN                               | 0                                       | 0          | 11                                         | 3.6072        | 0(0-Inf)               |
| THICKENING, TONGUE                             | 0                                       | 0          | 1                                          | 0.888         | 0(0-Inf)               |
| THICKENING, VOCAL CORD                         | 0                                       | 0          | 2                                          | 0.5475        | 0(0-Inf)               |
| THINNING CORNEA-SEE ALSO OPACITY               | 0                                       | 0          | 6                                          | 3.5931        | 0(0-Inf)               |
| THROAT CLEARING (HABIT)                        | 4                                       | 29.4934    | 110                                        | 33.6514       | 0.8764(0.3224-2.3828)  |
| THROMBOANGIITIS, OBLITERANS                    | 0                                       | 0          | 1                                          | 0.3526        | 0(0-Inf)               |
| THROMBOASTHENIA                                | 0                                       | 0          | 1                                          | 0.4048        | 0(0-Inf)               |
| THROMBOCYTHEMIA (HEMORRHAGIC)                  | 1                                       | 8.0779     | 18                                         | 6.4028        | 1.2616(0.1671-9.5259)  |
| THROMBOCYTOPENIA, CHRONIC                      | 3                                       | 30.9649    | 50                                         | 26.1608       | 1.1836(0.3679-3.8078)  |
| THROMBOCYTOPENIA, IDIOPATHIC                   | 0                                       | 0          | 17                                         | 4.8261        | 0(0-Inf)               |
| THROMBOCYTOPENIA, NOS                          | 32                                      | 334.4545   | 519                                        | 273.5254      | 1.2228(0.8547-1.7493)  |
| THROMBOCYTOSIS                                 | 4                                       | 30.4276    | 89                                         | 28.3522       | 1.0732(0.3928-2.9324)  |
| THROMBOEMBOLISM, NOS, SEE ALSO EMBOLISM        | 3                                       | 26.8031    | 18                                         | 7.5651        | 3.543(1.0333-12.1488)  |
| THROMBOEMBOLISM, PULMONARY                     | 0                                       | 0          | 11                                         | 3.4791        | 0(0-Inf)               |
| THROMBOEMBOLISM, PULMONARY, OLD                | 0                                       | 0          | 3                                          | 2.0941        | 0(0-Inf)               |
| THROMBOPATHY                                   | 0                                       | 0          | 9                                          | 6.556         | 0(0-Inf)               |
| THROMBOPHLEBITIS, COMPLICATION, CATHETER       | 0                                       | 0          | 1                                          | 0.4751        | 0(0-Inf)               |
| THROMBOPHLEBITIS, DEEP, RECURRENT              | 0                                       | 0          | 4                                          | 1.1121        | 0(0-Inf)               |
| THROMBOPHLEBITIS, LEG, NOS, SEE ALSO PHLEBITIS | 2                                       | 14.4858    | 74                                         | 21.4851       | 0.6742(0.165-2.7543)   |
| THROMBOPHLEBITIS, LEG, SUPERFICIAL VESSELS     | 13                                      | 91.1328    | 273                                        | 68.4195       | 1.332(0.7619-2.3287)   |

| Description                                                | No. of Positive Cases with Disease Code | Case Rate* | No. of Positive Controls with Disease Code | Control Rate* | Relative Risk (95%CI)   |
|------------------------------------------------------------|-----------------------------------------|------------|--------------------------------------------|---------------|-------------------------|
| THROMBOPHLEBITIS, MIGRATORY                                | 1                                       | 6.8777     | 0                                          | 0             | 12222490529.1718(0-Inf) |
| THROMBOPHLEBITIS, RECURRENT, NOS                           | 0                                       | 0          | 6                                          | 1.9218        | 0(0-Inf)                |
| THROMBOPHLEBITIS, SAPHENOUS                                | 0                                       | 0          | 12                                         | 3.0835        | 0(0-Inf)                |
| THROMBOPHLEBITIS, SUPERFICIAL, RECURRENT                   | 1                                       | 7.586      | 8                                          | 1.9069        | 3.9781(0.4886-32.3898)  |
| THROMBOSIS, AORTA, ABDOMINAL                               | 3                                       | 30.7974    | 102                                        | 53.3147       | 0.5777(0.183-1.8239)    |
| THROMBOSIS, AORTA, NOS                                     | 0                                       | 0          | 8                                          | 2.5902        | 0(0-Inf)                |
| THROMBOSIS, AORTA, THORACIC                                | 0                                       | 0          | 5                                          | 2.0352        | 0(0-Inf)                |
| THROMBOSIS, ARTERY, LOWER EXTREMITY                        | 0                                       | 0          | 2                                          | 0.7053        | 0(0-Inf)                |
| THROMBOSIS, ARTERY, NOS                                    | 0                                       | 0          | 9                                          | 3.9071        | 0(0-Inf)                |
| THROMBOSIS, ARTERY, UPPER EXTREMITY                        | 1                                       | 8.1141     | 3                                          | 1.0813        | 7.5042(0.7569-74.4008)  |
| THROMBOSIS, ATRIUM                                         | 0                                       | 0          | 27                                         | 18.879        | 0(0-Inf)                |
| THROMBOSIS, AXILLARY ARTERY                                | 0                                       | 0          | 1                                          | 0.2354        | 0(0-Inf)                |
| THROMBOSIS, AXILLARY VEIN                                  | 0                                       | 0          | 3                                          | 2.8212        | 0(0-Inf)                |
| THROMBOSIS, BASILAR ARTERY                                 | 0                                       | 0          | 1                                          | 0.8878        | 0(0-Inf)                |
| THROMBOSIS, BRACHIAL ARTERY                                | 0                                       | 0          | 5                                          | 2.0031        | 0(0-Inf)                |
| THROMBOSIS, BRAIN                                          | 0                                       | 0          | 1                                          | 0.3526        | 0(0-Inf)                |
| THROMBOSIS, CAPILLARY                                      | 0                                       | 0          | 4                                          | 1.0139        | 0(0-Inf)                |
| THROMBOSIS, CAROTID ARTERY                                 | 1                                       | 7.4187     | 19                                         | 5.9874        | 1.2391(0.1648-9.3132)   |
| THROMBOSIS, CEREBRAL                                       | 0                                       | 0          | 7                                          | 2.4592        | 0(0-Inf)                |
| THROMBOSIS, CEREBRAL ARTERY, MIDDLE                        | 0                                       | 0          | 1                                          | 0.4751        | 0(0-Inf)                |
| THROMBOSIS, CEREBRAL, OLD                                  | 0                                       | 0          | 1                                          | 0.398         | 0(0-Inf)                |
| THROMBOSIS, CORONARY, ACUTE                                | 0                                       | 0          | 33                                         | 12.5874       | 0(0-Inf)                |
| THROMBOSIS, CORONARY, OLD, SEE ALSO INFARCTION, MYOCARDIAL | 1                                       | 8.3502     | 3                                          | 1.1876        | 7.0313(0.7159-69.0545)  |
| THROMBOSIS, DEEP VENOUS-DVT, (CODE ALSO BY SITE IF STATED) | 30                                      | 330.4822   | 581                                        | 329.4512      | 1.0031(0.6943-1.4493)   |
| THROMBOSIS, DIGITAL ARTERY, FOOT                           | 0                                       | 0          | 1                                          | 0.4751        | 0(0-Inf)                |
| THROMBOSIS, DIGITAL ARTERY, HAND                           | 0                                       | 0          | 5                                          | 1.2803        | 0(0-Inf)                |
| THROMBOSIS, DUE TO INTERNAL PROSTHETIC DEVICE              | 0                                       | 0          | 10                                         | 3.6233        | 0(0-Inf)                |
| THROMBOSIS, EXTREMITY, LOWER (ARTERY)                      | 0                                       | 0          | 7                                          | 2.7936        | 0(0-Inf)                |
| THROMBOSIS, EXTREMITY, LOWER (VEIN)                        | 20                                      | 195.3369   | 364                                        | 173.0171      | 1.129(0.7188-1.7733)    |
| THROMBOSIS, EXTREMITY, UPPER (ARTERY)                      | 0                                       | 0          | 3                                          | 3.8496        | 0(0-Inf)                |
| THROMBOSIS, EXTREMITY, UPPER (VEIN)                        | 2                                       | 14.324     | 51                                         | 14.543        | 0.9849(0.2388-4.0621)   |
| THROMBOSIS, EYE                                            | 0                                       | 0          | 1                                          | 0.888         | 0(0-Inf)                |
| THROMBOSIS, FEMORAL ARTERY                                 | 1                                       | 8.7538     | 32                                         | 13.0834       | 0.6691(0.0911-4.9156)   |
| THROMBOSIS, FEMORAL, NOS (VEIN)                            | 3                                       | 31.3335    | 27                                         | 14.3823       | 2.1786(0.6568-7.2269)   |
| THROMBOSIS, FEMORAL, POST-CATHETERIZATION                  | 0                                       | 0          | 1                                          | 0.2354        | 0(0-Inf)                |
| THROMBOSIS, GENITAL ORGAN, MALE, NEC                       | 0                                       | 0          | 1                                          | 0.4751        | 0(0-Inf)                |
| THROMBOSIS, HEART, NOS                                     | 1                                       | 10.1207    | 14                                         | 7.1485        | 1.4158(0.1847-10.851)   |
| THROMBOSIS, HEMORRHOIDS, EXTERNAL                          | 4                                       | 30.1863    | 215                                        | 53.8102       | 0.561(0.2084-1.5104)    |

| Description                                           | No. of Positive Cases with Disease Code | Case Rate* | No. of Positive Controls with Disease Code | Control Rate* | Relative Risk (95%CI)   |
|-------------------------------------------------------|-----------------------------------------|------------|--------------------------------------------|---------------|-------------------------|
| THROMBOSIS, HEMORRHOIDS, INTERNAL                     | 0                                       | 0          | 25                                         | 6.242         | 0(0-Inf)                |
| THROMBOSIS, HEMORRHOIDS, NOS                          | 10                                      | 82.4072    | 243                                        | 62.1339       | 1.3263(0.7033-2.501)    |
| THROMBOSIS, HEPATIC, NOS                              | 0                                       | 0          | 1                                          | 0.2354        | 0(0-Inf)                |
| THROMBOSIS, ILIAC ARTERY                              | 0                                       | 0          | 14                                         | 4.8544        | 0(0-Inf)                |
| THROMBOSIS, ILIAC, NOS (VEIN)                         | 1                                       | 7.4885     | 6                                          | 1.8681        | 4.0087(0.4728-33.9887)  |
| THROMBOSIS, INTESTINE                                 | 0                                       | 0          | 3                                          | 2.0493        | 0(0-Inf)                |
| THROMBOSIS, JUGULAR                                   | 0                                       | 0          | 5                                          | 1.5259        | 0(0-Inf)                |
| THROMBOSIS, MESENTERIC ARTERY                         | 0                                       | 0          | 4                                          | 3.7171        | 0(0-Inf)                |
| THROMBOSIS, MESENTERIC VEIN                           | 1                                       | 8.6638     | 11                                         | 4.4307        | 1.9554(0.2499-15.3017)  |
| THROMBOSIS, MURAL (HEART#)                            | 1                                       | 7.5247     | 18                                         | 5.8218        | 1.2925(0.1714-9.7449)   |
| THROMBOSIS, PENIS                                     | 0                                       | 0          | 4                                          | 1.1904        | 0(0-Inf)                |
| THROMBOSIS, PERONEAL ARTERY                           | 0                                       | 0          | 4                                          | 3.7254        | 0(0-Inf)                |
| THROMBOSIS, PLATELET                                  | 0                                       | 0          | 1                                          | 0.3526        | 0(0-Inf)                |
| THROMBOSIS, POPLITEAL ARTERY                          | 0                                       | 0          | 26                                         | 10.9399       | 0(0-Inf)                |
| THROMBOSIS, PORTAL VEIN, NOS                          | 1                                       | 7.8786     | 10                                         | 3.4151        | 2.307(0.2914-18.2624)   |
| THROMBOSIS, PULMONARY ARTERY                          | 0                                       | 0          | 2                                          | 1.0785        | 0(0-Inf)                |
| THROMBOSIS, RADIAL ARTERY                             | 0                                       | 0          | 2                                          | 0.7896        | 0(0-Inf)                |
| THROMBOSIS, RECURRENT                                 | 2                                       | 19.1225    | 61                                         | 28.5483       | 0.6698(0.1634-2.7464)   |
| THROMBOSIS, RENAL                                     | 0                                       | 0          | 1                                          | 0.2354        | 0(0-Inf)                |
| THROMBOSIS, RENAL ARTERY                              | 0                                       | 0          | 4                                          | 1.2654        | 0(0-Inf)                |
| THROMBOSIS, RENAL VEIN                                | 0                                       | 0          | 8                                          | 3.0876        | 0(0-Inf)                |
| THROMBOSIS, RETINAL ARTERY                            | 1                                       | 6.8883     | 0                                          | 0             | 12235616744.5952(0-Inf) |
| THROMBOSIS, RETINAL VEIN                              | 0                                       | 0          | 3                                          | 2.5584        | 0(0-Inf)                |
| THROMBOSIS, RETINAL VEIN, CENTRAL                     | 0                                       | 0          | 1                                          | 0.8878        | 0(0-Inf)                |
| THROMBOSIS, SINUS, CEREBRAL, (INFECTIOUS OR PYOGENIC) | 0                                       | 0          | 3                                          | 0.7175        | 0(0-Inf)                |
| THROMBOSIS, SINUS, NON-PYOGENIC ORIGIN, NOS           | 0                                       | 0          | 1                                          | 0.3526        | 0(0-Inf)                |
| THROMBOSIS, SPLEEN                                    | 0                                       | 0          | 1                                          | 0.398         | 0(0-Inf)                |
| THROMBOSIS, SPLENIC ARTERY                            | 0                                       | 0          | 1                                          | 0.3526        | 0(0-Inf)                |
| THROMBOSIS, SPLENIC VEIN                              | 0                                       | 0          | 5                                          | 2.0027        | 0(0-Inf)                |
| THROMBOSIS, SUBCLAVIAN VEIN                           | 0                                       | 0          | 16                                         | 7.6482        | 0(0-Inf)                |
| THROMBOSIS, TIBIAL ARTERY                             | 0                                       | 0          | 4                                          | 1.9302        | 0(0-Inf)                |
| THROMBOSIS, TUMOR, CODE ALSO THROMBOSIS BY SITE       | 0                                       | 0          | 4                                          | 3.725         | 0(0-Inf)                |
| THROMBOSIS, ULNAR ARTERY                              | 0                                       | 0          | 2                                          | 0.7052        | 0(0-Inf)                |
| THROMBOSIS, VARICOSITY, LOWER EXTREMITY               | 0                                       | 0          | 5                                          | 1.7349        | 0(0-Inf)                |
| THROMBOSIS, VARIX, LOWER EXTREMITY                    | 0                                       | 0          | 5                                          | 1.1945        | 0(0-Inf)                |
| THROMBOSIS, VASCULAR GRAFT OR SHUNT                   | 2                                       | 20.4738    | 27                                         | 13.9949       | 1.4629(0.3462-6.182)    |
| THROMBOSIS, VASCULAR, LOWER EXTREMITY                 | 0                                       | 0          | 3                                          | 0.9166        | 0(0-Inf)                |
| THROMBOSIS, VASCULAR, NOS                             | 0                                       | 0          | 12                                         | 3.1937        | 0(0-Inf)                |
| THROMBOSIS, VASCULAR, UPPER EXTREMITY                 | 0                                       | 0          | 9                                          | 2.2986        | 0(0-Inf)                |
| THROMBOSIS, VEIN NEC/NOS, SEE ALSO EMBOLISM           | 2                                       | 15.8394    | 27                                         | 9.3011        | 1.703(0.4022-7.2109)    |

| Description                                                | No. of Positive Cases with Disease Code | Case Rate* | No. of Positive Controls with Disease Code | Control Rate* | Relative Risk (95%CI)    |
|------------------------------------------------------------|-----------------------------------------|------------|--------------------------------------------|---------------|--------------------------|
| THROMBOSIS, VEIN, CHEST                                    | 0                                       | 0          | 1                                          | 0.4751        | 0(0-Inf)                 |
| THROMBOSIS, VEIN, INNOMINATE                               | 0                                       | 0          | 1                                          | 0.2354        | 0(0-Inf)                 |
| THROMBOSIS, VENA CAVA                                      | 0                                       | 0          | 5                                          | 2.7035        | 0(0-Inf)                 |
| THROMBOSIS, VENOUS, NOS (SYSTEMIC)                         | 0                                       | 0          | 23                                         | 10.9019       | 0(0-Inf)                 |
| THROMBOSIS, VENOUS, OVARIAN REMNANT                        | 0                                       | 0          | 1                                          | 0.2354        | 0(0-Inf)                 |
| THROMBOSIS, VERTEBRAL ARTERY                               | 1                                       | 6.9414     | 1                                          | 0.2544        | 27.2802(1.6073-463.0237) |
| THROMBUS OF ATRIUM-SEE ALSO THROMBOSIS                     | 0                                       | 0          | 17                                         | 9.5002        | 0(0-Inf)                 |
| THRUSH                                                     | 8                                       | 73.0968    | 165                                        | 72.0236       | 1.0149(0.4981-2.0678)    |
| THRUST TONGUE                                              | 0                                       | 0          | 1                                          | 0.4048        | 0(0-Inf)                 |
| THYMOMA, NOS                                               | 0                                       | 0          | 8                                          | 2.8818        | 0(0-Inf)                 |
| THYROIDITIS, ACUTE                                         | 0                                       | 0          | 8                                          | 1.9194        | 0(0-Inf)                 |
| THYROIDITIS, AUTOIMMUNE                                    | 0                                       | 0          | 15                                         | 3.7147        | 0(0-Inf)                 |
| THYROIDITIS, CHRONIC                                       | 0                                       | 0          | 8                                          | 2.6129        | 0(0-Inf)                 |
| THYROIDITIS, DE QUERVAIN'S                                 | 1                                       | 7.786      | 0                                          | 0             | 17358449344.9516(0-Inf)  |
| THYROIDITIS, EUTHYROID                                     | 0                                       | 0          | 39                                         | 10.3053       | 0(0-Inf)                 |
| THYROIDITIS, GRANULOMATOUS                                 | 2                                       | 21.1236    | 5                                          | 1.3788        | 15.3201(2.8922-81.1502)  |
| THYROIDITIS, HASHIMOTO'S, EUTHYROID                        | 1                                       | 6.9335     | 25                                         | 6.0364        | 1.1486(0.1546-8.5345)    |
| THYROIDITIS, HASHIMOTO'S--THYH                             | 10                                      | 76.4179    | 381                                        | 87.0104       | 0.8783(0.468-1.6481)     |
| THYROIDITIS, LYMPHOCYTIC                                   | 0                                       | 0          | 20                                         | 4.5797        | 0(0-Inf)                 |
| THYROIDITIS, NOS--THY                                      | 2                                       | 14.8188    | 41                                         | 9.3376        | 1.587(0.3816-6.6007)     |
| THYROIDITIS, SUBACUTE                                      | 2                                       | 16.412     | 29                                         | 6.6188        | 2.4796(0.5867-10.479)    |
| THYROTOXICOSIS, EXOGENOUS                                  | 0                                       | 0          | 4                                          | 0.9157        | 0(0-Inf)                 |
| THYROTOXICOSIS, NOS                                        | 0                                       | 0          | 52                                         | 13.1682       | 0(0-Inf)                 |
| THYROTOXICOSIS, T3                                         | 0                                       | 0          | 2                                          | 0.8098        | 0(0-Inf)                 |
| TIBIA VARA                                                 | 0                                       | 0          | 1                                          | 0.3526        | 0(0-Inf)                 |
| TIC, DOULOUREUX, NOS                                       | 0                                       | 0          | 17                                         | 6.357         | 0(0-Inf)                 |
| TIC, DOULOUREUX, SECOND DIVISION                           | 0                                       | 0          | 4                                          | 1.6258        | 0(0-Inf)                 |
| TIC, DOULOUREUX, THIRD DIVISION                            | 0                                       | 0          | 2                                          | 0.8101        | 0(0-Inf)                 |
| TIC, NOS                                                   | 2                                       | 14.161     | 23                                         | 6.3831        | 2.2185(0.5185-9.4915)    |
| TICK BITE OR EMBEDDED CODE ALSO INJURY SUPERFICIAL BY SITE | 1                                       | 8.1707     | 189                                        | 69.8054       | 0.1171(0.0164-0.8358)    |
| TIGHT, ACHILLES TENDON                                     | 0                                       | 0          | 5                                          | 1.2369        | 0(0-Inf)                 |
| TIGHT, CAST/SPLINT/IMMOBILIZER                             | 1                                       | 10.3348    | 9                                          | 4.8202        | 2.1441(0.2685-17.1223)   |
| TIGHT, HAMSTRING                                           | 0                                       | 0          | 10                                         | 3.0984        | 0(0-Inf)                 |
| TIGHT, HIPS                                                | 0                                       | 0          | 4                                          | 1.0273        | 0(0-Inf)                 |
| TIGHT, MUSCLE                                              | 3                                       | 25.905     | 47                                         | 18.7421       | 1.3822(0.4283-4.4605)    |
| TILT, PELVIC                                               | 0                                       | 0          | 2                                          | 1.1619        | 0(0-Inf)                 |
| TINEA, AMIANTACEA                                          | 1                                       | 8.1239     | 3                                          | 1.0816        | 7.5112(0.7576-74.4684)   |
| TINEA, BARBAE                                              | 0                                       | 0          | 2                                          | 1.7759        | 0(0-Inf)                 |
| TINEA, CAPITIS                                             | 1                                       | 9.8572     | 13                                         | 6.3898        | 1.5426(0.2001-11.8922)   |

| Description                         | No. of Positive Cases with Disease Code | Case Rate* | No. of Positive Controls with Disease Code | Control Rate* | Relative Risk (95%CI)  |
|-------------------------------------|-----------------------------------------|------------|--------------------------------------------|---------------|------------------------|
| TINEA, CIRCINATA                    | 0                                       | 0          | 3                                          | 1.7276        | 0(0-Inf)               |
| TINEA, CORPORIS                     | 17                                      | 123.0018   | 429                                        | 124.407       | 0.9887(0.6081-1.6075)  |
| TINEA, CRURIS                       | 19                                      | 137.8795   | 548                                        | 169.0376      | 0.8157(0.5158-1.29)    |
| TINEA, FINGERNAIL                   | 0                                       | 0          | 6                                          | 2.7664        | 0(0-Inf)               |
| TINEA, FOOT                         | 0                                       | 0          | 21                                         | 5.4249        | 0(0-Inf)               |
| TINEA, HAND                         | 0                                       | 0          | 6                                          | 1.7424        | 0(0-Inf)               |
| TINEA, INGUINALIS                   | 0                                       | 0          | 1                                          | 0.888         | 0(0-Inf)               |
| TINEA, INTERTRIGINOUS               | 0                                       | 0          | 4                                          | 1.9295        | 0(0-Inf)               |
| TINEA, MANUUM                       | 0                                       | 0          | 49                                         | 18.3129       | 0(0-Inf)               |
| TINEA, NOS-SEE ALSO DERMATOPHYTOSIS | 5                                       | 36.9479    | 262                                        | 81.012        | 0.4561(0.188-1.1062)   |
| TINEA, PEDIS                        | 50                                      | 370.8402   | 1178                                       | 343.9534      | 1.0782(0.8118-1.432)   |
| TINEA, RUBRUM                       | 0                                       | 0          | 2                                          | 1.8979        | 0(0-Inf)               |
| TINEA, TOENAIL                      | 1                                       | 7.7702     | 20                                         | 6.666         | 1.1656(0.1553-8.7475)  |
| TINEA, UNGUIUM                      | 3                                       | 21.3871    | 132                                        | 37.7369       | 0.5667(0.1801-1.7832)  |
| TINEA, VERSICOLOR                   | 4                                       | 33.4985    | 127                                        | 33.0037       | 1.015(0.3743-2.7523)   |
| TINGLING                            | 9                                       | 68.2796    | 253                                        | 80.5258       | 0.8479(0.4354-1.6514)  |
| TINNITUS                            | 36                                      | 261.7921   | 1139                                       | 322.0466      | 0.8129(0.5829-1.1337)  |
| TIREDNESS-SEE ALSO ASTHENIA         | 2                                       | 19.0916    | 40                                         | 18.8306       | 1.0139(0.244-4.2134)   |
| TOBACCO USE                         | 8                                       | 57.8069    | 333                                        | 97.0434       | 0.5957(0.2951-1.2025)  |
| TONIC PUPIL                         | 0                                       | 0          | 1                                          | 0.4048        | 0(0-Inf)               |
| TONSILLITIS, ACUTE                  | 1                                       | 13.5968    | 21                                         | 7.1578        | 1.8996(0.2539-14.2125) |
| TONSILLITIS, BACTERIAL              | 0                                       | 0          | 1                                          | 0.2729        | 0(0-Inf)               |
| TONSILLITIS, CHRONIC                | 0                                       | 0          | 15                                         | 3.9442        | 0(0-Inf)               |
| TONSILLITIS, FOLLICULAR             | 0                                       | 0          | 2                                          | 1.6559        | 0(0-Inf)               |
| TONSILLITIS, NOS                    | 3                                       | 31.0336    | 123                                        | 33.5848       | 0.924(0.2933-2.911)    |
| TONSILLITIS, RECURRENT              | 0                                       | 0          | 2                                          | 0.4853        | 0(0-Inf)               |
| TONSILLITIS, STREPTOCOCCAL          | 0                                       | 0          | 33                                         | 10.4573       | 0(0-Inf)               |
| TONSILLITIS, VIRAL                  | 0                                       | 0          | 3                                          | 0.7021        | 0(0-Inf)               |
| TONSILLOPHARYNGITIS, ACUTE          | 0                                       | 0          | 13                                         | 5.6383        | 0(0-Inf)               |
| TONSILLOPHARYNGITIS, CHRONIC        | 0                                       | 0          | 1                                          | 0.3526        | 0(0-Inf)               |
| TOOTHACHE                           | 3                                       | 25.7712    | 77                                         | 30.4646       | 0.8459(0.2662-2.6887)  |
| TOPHUS (TOPHI)                      | 0                                       | 0          | 8                                          | 6.4429        | 0(0-Inf)               |
| TORSADES DE POINTES                 | 0                                       | 0          | 5                                          | 3.9051        | 0(0-Inf)               |
| TORSION, AORTA, ABDOMINAL           | 0                                       | 0          | 2                                          | 1.1973        | 0(0-Inf)               |
| TORSION, AORTA, NEC                 | 0                                       | 0          | 2                                          | 0.6309        | 0(0-Inf)               |
| TORSION, AORTA, THORACIC            | 0                                       | 0          | 1                                          | 0.8882        | 0(0-Inf)               |
| TORSION, APPENDIX, TESTIS           | 0                                       | 0          | 2                                          | 0.5458        | 0(0-Inf)               |
| TORSION, CAROTID                    | 0                                       | 0          | 5                                          | 3.2669        | 0(0-Inf)               |
| TORSION, FALLOPIAN TUBE             | 0                                       | 0          | 6                                          | 1.3432        | 0(0-Inf)               |
| TORSION, GALLBLADDER                | 0                                       | 0          | 1                                          | 0.8528        | 0(0-Inf)               |



| Description                                                    | No. of Positive Cases with Disease Code | Case Rate* | No. of Positive Controls with Disease Code | Control Rate* | Relative Risk (95%CI)   |
|----------------------------------------------------------------|-----------------------------------------|------------|--------------------------------------------|---------------|-------------------------|
| TORSION, INTESTINE-SEE ALSO VOLVULUS                           | 1                                       | 7.9412     | 15                                         | 5.1848        | 1.5316(0.2004-11.7045)  |
| TORSION, OVARY                                                 | 0                                       | 0          | 17                                         | 7.8266        | 0(0-Inf)                |
| TORSION, TESTICLE                                              | 0                                       | 0          | 1                                          | 0.2729        | 0(0-Inf)                |
| TORSION, UTERUS                                                | 0                                       | 0          | 2                                          | 0.5837        | 0(0-Inf)                |
| TORTICOLLIS, CONGENITAL                                        | 0                                       | 0          | 2                                          | 0.4854        | 0(0-Inf)                |
| TORTICOLLIS, NOS                                               | 3                                       | 20.8906    | 49                                         | 11.9091       | 1.7542(0.5436-5.6609)   |
| TORTICOLLIS, SPASMODIC                                         | 0                                       | 0          | 19                                         | 4.7235        | 0(0-Inf)                |
| TORTUOUS, ARTERY                                               | 2                                       | 19.0877    | 14                                         | 6.5025        | 2.9354(0.6603-13.0499)  |
| TORTUOUS, RETINAL VESSEL                                       | 0                                       | 0          | 2                                          | 0.4853        | 0(0-Inf)                |
| TORTUOUS, URETER                                               | 1                                       | 11.694     | 0                                          | 0             | 8836614368.2466(0-Inf)  |
| TORTUOUS, URETHRA                                              | 0                                       | 0          | 4                                          | 1.8403        | 0(0-Inf)                |
| TORTUOUS, VEIN                                                 | 0                                       | 0          | 8                                          | 2.1429        | 0(0-Inf)                |
| TORUS, MANDIBULARIS                                            | 3                                       | 21.0956    | 91                                         | 22.0219       | 0.9579(0.3024-3.035)    |
| TORUS, MAXILLARY                                               | 0                                       | 0          | 6                                          | 2.2093        | 0(0-Inf)                |
| TORUS, PALATINUS                                               | 4                                       | 28.0997    | 75                                         | 17.7712       | 1.5812(0.5758-4.3422)   |
| TOUCH (CORNEAL VITREOUS)                                       | 0                                       | 0          | 2                                          | 0.7054        | 0(0-Inf)                |
| TOXEMIA, INTESTINAL                                            | 1                                       | 13.5384    | 0                                          | 0             | 20071733239.3566(0-Inf) |
| TOXEMIA, PREECLAMPTIC                                          | 0                                       | 0          | 1                                          | 0.8272        | 0(0-Inf)                |
| TOXEMIA, PREGNANCY                                             | 0                                       | 0          | 1                                          | 0.8271        | 0(0-Inf)                |
| TOXICITY, DRUG INDUCED-CODE ALSO EFFECT ADVERSE BY DRUG STATED | 5                                       | 48.9209    | 162                                        | 78.5343       | 0.6229(0.2554-1.5192)   |
| TOXICITY, NOS                                                  | 1                                       | 7.3457     | 7                                          | 2.0898        | 3.5151(0.4243-29.1186)  |
| TOXICITY, PULMONARY                                            | 0                                       | 0          | 5                                          | 3.9043        | 0(0-Inf)                |
| TOXOPLASMOSIS, NOS                                             | 0                                       | 0          | 2                                          | 0.5709        | 0(0-Inf)                |
| TRABECULATION OF BLADDER                                       | 42                                      | 494.7386   | 561                                        | 332.002       | 1.4902(1.0882-2.0407)   |
| TRACHEITIS, BACTERIAL                                          | 0                                       | 0          | 1                                          | 0.398         | 0(0-Inf)                |
| TRACHEITIS, CHEMICAL                                           | 0                                       | 0          | 1                                          | 0.234         | 0(0-Inf)                |
| TRACHEITIS, NOS                                                | 2                                       | 14.7969    | 64                                         | 15.1456       | 0.977(0.2383-4.0062)    |
| TRACHEITIS, RADIATION, CODE ALSO EFFECT ADVERSE                | 0                                       | 0          | 1                                          | 0.3526        | 0(0-Inf)                |
| TRACHEITIS, VIRAL                                              | 0                                       | 0          | 21                                         | 5.8736        | 0(0-Inf)                |
| TRACHEITIS, VIRAL, ACUTE                                       | 0                                       | 0          | 1                                          | 0.234         | 0(0-Inf)                |
| TRACHEITIS, WITH LARYNGITIS                                    | 0                                       | 0          | 3                                          | 0.741         | 0(0-Inf)                |
| TRACHEOBRONCHITIS, ACUTE OR SUBACUTE                           | 2                                       | 13.8674    | 26                                         | 6.5408        | 2.1201(0.4993-9.0022)   |
| TRACHEOBRONCHITIS, CHRONIC                                     | 0                                       | 0          | 1                                          | 0.2354        | 0(0-Inf)                |
| TRACHEOBRONCHITIS, NOS                                         | 12                                      | 88.4399    | 256                                        | 60.4058       | 1.4641(0.8188-2.6179)   |
| TRACHEOBRONCHITIS, VIRAL                                       | 0                                       | 0          | 11                                         | 3.5576        | 0(0-Inf)                |
| TRACHEOBRONCHOMEGALY                                           | 0                                       | 0          | 1                                          | 0.4048        | 0(0-Inf)                |
| TRACHEOMALACIA                                                 | 0                                       | 0          | 3                                          | 2.0478        | 0(0-Inf)                |
| TRACHEOPATHIA OSTEOPLASTICA                                    | 0                                       | 0          | 5                                          | 1.7342        | 0(0-Inf)                |
| TRACHEOPHARYNGITIS (ACUTE)                                     | 0                                       | 0          | 3                                          | 0.964         | 0(0-Inf)                |

| Description                                                         | No. of Positive Cases with Disease Code | Case Rate* | No. of Positive Controls with Disease Code | Control Rate* | Relative Risk (95%CI)   |
|---------------------------------------------------------------------|-----------------------------------------|------------|--------------------------------------------|---------------|-------------------------|
| TRAIT, HEMOGLOBIN E                                                 | 0                                       | 0          | 2                                          | 0.4853        | 0(0-Inf)                |
| TRAIT, SICKLE CELL                                                  | 0                                       | 0          | 1                                          | 0.2354        | 0(0-Inf)                |
| TRAIT, THALASSEMIA BETA                                             | 0                                       | 0          | 4                                          | 0.9157        | 0(0-Inf)                |
| TRANSILLUMINATION (POSITIVE)                                        | 1                                       | 6.8934     | 0                                          | 0             | 12238167163.8057(0-Inf) |
| TRANSITIONAL VERTEBRA                                               | 0                                       | 0          | 9                                          | 2.2042        | 0(0-Inf)                |
| TRAPPED, LUNG                                                       | 0                                       | 0          | 5                                          | 3.9036        | 0(0-Inf)                |
| TRAUMA, EYE                                                         | 0                                       | 0          | 22                                         | 5.4854        | 0(0-Inf)                |
| TRAUMA, EYE, LATE EFFECT                                            | 0                                       | 0          | 8                                          | 3.8428        | 0(0-Inf)                |
| TRAUMA, GLOBE                                                       | 0                                       | 0          | 2                                          | 0.5069        | 0(0-Inf)                |
| TRAUMA, NOS, SEE ALSO INJURY BY SITE                                | 4                                       | 35.9119    | 56                                         | 23.7308       | 1.5133(0.5464-4.1915)   |
| TRAUMA, ORBIT, LATE EFFECT                                          | 0                                       | 0          | 2                                          | 0.6775        | 0(0-Inf)                |
| TREMOR, ESSENTIAL                                                   | 30                                      | 269.7783   | 561                                        | 229.8586      | 1.1737(0.8119-1.6966)   |
| TREMOR, FAMILIAL                                                    | 5                                       | 41.5825    | 117                                        | 43.5147       | 0.9556(0.3895-2.3446)   |
| TREMOR, HEREDITARY                                                  | 0                                       | 0          | 2                                          | 1.0782        | 0(0-Inf)                |
| TREMOR, INTENTION                                                   | 4                                       | 39.0594    | 55                                         | 26.4252       | 1.4781(0.5335-4.0949)   |
| TREMOR, INTENTION, FAMILIAL                                         | 0                                       | 0          | 1                                          | 0.4048        | 0(0-Inf)                |
| TREMOR, NOS                                                         | 26                                      | 266.3213   | 562                                        | 288.2273      | 0.924(0.623-1.3705)     |
| TREMOR, PARKINSON'S                                                 | 2                                       | 27.7675    | 19                                         | 14.9165       | 1.8615(0.4313-8.0342)   |
| TREMOR, REST                                                        | 0                                       | 0          | 36                                         | 23.8575       | 0(0-Inf)                |
| TREMOR, RUBRAL                                                      | 0                                       | 0          | 1                                          | 0.3526        | 0(0-Inf)                |
| TREMOR, SENILE                                                      | 0                                       | 0          | 8                                          | 3.4865        | 0(0-Inf)                |
| TREMOR, VOICE                                                       | 5                                       | 40.1331    | 45                                         | 15.6537       | 2.5638(1.0109-6.5023)   |
| TREMULOUS FEELING                                                   | 0                                       | 0          | 14                                         | 4.4669        | 0(0-Inf)                |
| TRICHIASIS, EYELID                                                  | 4                                       | 30.8061    | 69                                         | 22.5558       | 1.3658(0.4965-3.7573)   |
| TRICHIASIS, NOS                                                     | 7                                       | 57.074     | 154                                        | 55.7186       | 1.0243(0.4791-2.1899)   |
| TRICHOEPITHELIOMA, MALIGNANT, CODE ALSO NEOPLASM, MALIGNANT BY SITE | 2                                       | 18.1682    | 12                                         | 5.2037        | 3.4914(0.7727-15.7763)  |
| TRICHOEPITHELIOMA, NOS, CODE ALSO NEOPLASM, BENIGN BY SITE          | 1                                       | 6.9692     | 36                                         | 9.1514        | 0.7615(0.1039-5.5797)   |
| TRICHOFOLLICULOMA                                                   | 0                                       | 0          | 7                                          | 2.795         | 0(0-Inf)                |
| TRICHOLEMMOMA CODE ALSO NEO BENIGN BY SITE                          | 2                                       | 16.2801    | 27                                         | 9.873         | 1.649(0.3898-6.9752)    |
| TRICHOMONIASIS, CERVIX                                              | 0                                       | 0          | 3                                          | 0.6548        | 0(0-Inf)                |
| TRICHOMONIASIS, NOS                                                 | 0                                       | 0          | 9                                          | 2.1184        | 0(0-Inf)                |
| TRICHOMONIASIS, URETHRA                                             | 0                                       | 0          | 1                                          | 1.0372        | 0(0-Inf)                |
| TRICHOMONIASIS, VAGINA                                              | 0                                       | 0          | 7                                          | 2.3173        | 0(0-Inf)                |
| TRICHOPHYTOSIS-SEE ALSO DERMATOPHYTOSIS                             | 0                                       | 0          | 10                                         | 2.4968        | 0(0-Inf)                |
| TRICHORRHEXIS NODOSA                                                | 0                                       | 0          | 1                                          | 0.398         | 0(0-Inf)                |
| TRICHOSTASIS SPINULOSA                                              | 1                                       | 7.7379     | 11                                         | 3.6903        | 2.0968(0.2677-16.4231)  |
| TRICHOTILLOMANIA                                                    | 0                                       | 0          | 4                                          | 0.9419        | 0(0-Inf)                |
| TRICHURIASIS/TRICHIURA/TRICHURIS                                    | 0                                       | 0          | 1                                          | 0.234         | 0(0-Inf)                |

| Description                                                    | No. of Positive Cases with Disease Code | Case Rate* | No. of Positive Controls with Disease Code | Control Rate* | Relative Risk (95%CI)    |
|----------------------------------------------------------------|-----------------------------------------|------------|--------------------------------------------|---------------|--------------------------|
| TRICUSPID AORTIC VALVE (ANOMALY)                               | 1                                       | 10.2871    | 33                                         | 17.1763       | 0.5989(0.0816-4.3935)    |
| TRIGEMINY                                                      | 0                                       | 0          | 9                                          | 2.7231        | 0(0-Inf)                 |
| TRIGGER FINGER, NOS                                            | 23                                      | 168.3049   | 883                                        | 248.4741      | 0.6774(0.4474-1.0256)    |
| TRIGLYCERIDEMIA                                                | 0                                       | 0          | 14                                         | 3.2724        | 0(0-Inf)                 |
| TRIGONITIS, CHRONIC                                            | 3                                       | 21.2295    | 123                                        | 32.7742       | 0.6478(0.2055-2.0415)    |
| TRIGONITIS, NOS                                                | 8                                       | 56.1862    | 170                                        | 39.6689       | 1.4164(0.6949-2.8871)    |
| TRIGONITIS, RECURRENT                                          | 0                                       | 0          | 7                                          | 1.6491        | 0(0-Inf)                 |
| TRIGONITIS, URETHRAL, SEE ALSO URETHROTRIGONITIS               | 0                                       | 0          | 16                                         | 3.538         | 0(0-Inf)                 |
| TRISMUS                                                        | 1                                       | 7.1256     | 11                                         | 2.4943        | 2.8567(0.3632-22.4712)   |
| TUBE CHECK (EAR)                                               | 1                                       | 8.9541     | 7                                          | 2.9555        | 3.0296(0.3668-25.0218)   |
| TUBERCULOSIS, BONE OR JOINT, NEC                               | 1                                       | 11.2225    | 0                                          | 0             | 7462645582.467(0-Inf)    |
| TUBERCULOSIS, BONE OR JOINT, NOS                               | 1                                       | 11.219     | 0                                          | 0             | 7460537103.5546(0-Inf)   |
| TUBERCULOSIS, EYE                                              | 0                                       | 0          | 1                                          | 0.2729        | 0(0-Inf)                 |
| TUBERCULOSIS, HIP                                              | 0                                       | 0          | 1                                          | 0.2354        | 0(0-Inf)                 |
| TUBERCULOSIS, INACTIVE, NOS                                    | 0                                       | 0          | 9                                          | 2.7993        | 0(0-Inf)                 |
| TUBERCULOSIS, KIDNEY                                           | 0                                       | 0          | 2                                          | 1.2662        | 0(0-Inf)                 |
| TUBERCULOSIS, LATE EFFECT ON BONES AND JOINTS, NEC             | 0                                       | 0          | 1                                          | 0.2729        | 0(0-Inf)                 |
| TUBERCULOSIS, LATE EFFECT ON CENTRAL NERVOUS SYSTEM            | 0                                       | 0          | 1                                          | 0.2729        | 0(0-Inf)                 |
| TUBERCULOSIS, LATE EFFECT ON HIP                               | 0                                       | 0          | 1                                          | 0.234         | 0(0-Inf)                 |
| TUBERCULOSIS, LATE EFFECT ON ORGANS, NEC                       | 0                                       | 0          | 1                                          | 0.8877        | 0(0-Inf)                 |
| TUBERCULOSIS, LATE EFFECT ON RESPIRATORY SYSTEM                | 0                                       | 0          | 1                                          | 0.4048        | 0(0-Inf)                 |
| TUBERCULOSIS, MENINGES                                         | 0                                       | 0          | 1                                          | 0.2729        | 0(0-Inf)                 |
| TUBERCULOSIS, NOS                                              | 1                                       | 30.5686    | 0                                          | 0             | 14389488524.7536(0-Inf)  |
| TUBERCULOSIS, ORGAN, NEC                                       | 2                                       | 15.4125    | 2                                          | 0.6587        | 23.3971(3.1714-172.6136) |
| TUBERCULOSIS, PLEURA                                           | 0                                       | 0          | 1                                          | 2.4923        | 0(0-Inf)                 |
| TUBERCULOSIS, PULMONARY, ACTIVE, STAGE UNSPECIFIED             | 0                                       | 0          | 2                                          | 0.8097        | 0(0-Inf)                 |
| TUBERCULOSIS, PULMONARY, INACTIVE                              | 1                                       | 7.0916     | 15                                         | 4.0735        | 1.7409(0.2273-13.3318)   |
| TUBERCULOSIS, PULMONARY, NOS                                   | 1                                       | 8.9818     | 14                                         | 5.959         | 1.5073(0.1966-11.5568)   |
| TUBERCULOSIS, RECTUM                                           | 1                                       | 30.5701    | 0                                          | 0             | 14390128532.9803(0-Inf)  |
| TUBERCULOSIS, SPINE                                            | 0                                       | 0          | 1                                          | 0.2729        | 0(0-Inf)                 |
| TUBOTYMPANITIS                                                 | 0                                       | 0          | 2                                          | 0.6309        | 0(0-Inf)                 |
| TUMOR, ACRAL ARTERIOVENOUS (HEMANGIOMA)                        | 0                                       | 0          | 26                                         | 6.7538        | 0(0-Inf)                 |
| TUMOR, ADENOMATOID, NOS/BENIGN (CODE ALSO NEO. BENIGN BY SITE) | 0                                       | 0          | 5                                          | 1.2092        | 0(0-Inf)                 |
| TUMOR, BENIGN, SEE ALSO NEOPLASM, BENIGN BY SITE               | 0                                       | 0          | 4                                          | 0.9522        | 0(0-Inf)                 |
| TUMOR, BLADDER (MALIGNANT)                                     | 8                                       | 111.8178   | 175                                        | 138.0577      | 0.8099(0.3983-1.6472)    |
| TUMOR, BRENNER (OVARY BENIGN#)                                 | 0                                       | 0          | 12                                         | 5.6535        | 0(0-Inf)                 |
| TUMOR, CARCINOID, NOS, CODE ALSO NEOPLASM MALIGNANT BY SITE    | 0                                       | 0          | 30                                         | 11.2827       | 0(0-Inf)                 |
| TUMOR, CYSTIC, NOS, CODE ALSO NEOPLASM, BENIGN BY SITE         | 0                                       | 0          | 2                                          | 1.7084        | 0(0-Inf)                 |

| Description                                                                | No. of Positive Cases with Disease Code | Case Rate* | No. of Positive Controls with Disease Code | Control Rate* | Relative Risk (95%CI) |
|----------------------------------------------------------------------------|-----------------------------------------|------------|--------------------------------------------|---------------|-----------------------|
| TUMOR, DERMOID, NOS, CODE ALSO NEOPLASM, BENIGN BY SITE                    | 0                                       | 0          | 1                                          | 0.234         | 0(0-Inf)              |
| TUMOR, DESMOID, NOS, CODE ALSO NEOPLASM, BENIGN BY SITE                    | 0                                       | 0          | 4                                          | 1.0352        | 0(0-Inf)              |
| TUMOR, EPIDERMOID, NOS, CODE ALSO NEOPLASM, BENIGN BY SITE                 | 0                                       | 0          | 1                                          | 0.3526        | 0(0-Inf)              |
| TUMOR, EPITHELIAL, NOS, CODE ALSO NEOPLASM, BENIGN BY SITE                 | 0                                       | 0          | 3                                          | 0.9608        | 0(0-Inf)              |
| TUMOR, FIBROUS, NOS, CODE ALSO NEOPLASM, BENIGN BY SITE                    | 0                                       | 0          | 3                                          | 0.8873        | 0(0-Inf)              |
| TUMOR, GERM CELL (MALE-MALIGNANT)-SEE ALSO SEMINOMA/DYSGERMINOMA (TESTIS#) | 0                                       | 0          | 1                                          | 0.4751        | 0(0-Inf)              |
| TUMOR, GIANT CELL, NOS, CODE ALSO NEOPLASM, BENIGN BY SITE                 | 0                                       | 0          | 8                                          | 1.9716        | 0(0-Inf)              |
| TUMOR, GIANT CELL, TENDON SHEATH                                           | 1                                       | 7.1945     | 32                                         | 7.5604        | 0.9516(0.1293-7.0011) |
| TUMOR, GLOMUS, NOS, CODE ALSO NEO BENIGN BY SITE                           | 0                                       | 0          | 8                                          | 1.8477        | 0(0-Inf)              |
| TUMOR, GLOMUS, SKIN                                                        | 0                                       | 0          | 3                                          | 0.6986        | 0(0-Inf)              |
| TUMOR, GRANULAR CELL, CODE ALSO NEO BENIGN BY SITE                         | 0                                       | 0          | 1                                          | 0.234         | 0(0-Inf)              |
| TUMOR, GRANULOSA CELL, MALIGNANT (OVARY #)                                 | 0                                       | 0          | 1                                          | 0.398         | 0(0-Inf)              |
| TUMOR, GRANULOSA CELL, NOS (OVARY #)                                       | 0                                       | 0          | 3                                          | 0.7022        | 0(0-Inf)              |
| TUMOR, HURTHLE CELL                                                        | 0                                       | 0          | 4                                          | 1.1822        | 0(0-Inf)              |
| TUMOR, ISLET CELL, CODE ALSO NEOPLASM MALIGNANT BY SITE                    | 0                                       | 0          | 3                                          | 0.9164        | 0(0-Inf)              |
| TUMOR, ISLET CELL, PANCREAS, MALIGNANT                                     | 0                                       | 0          | 6                                          | 2.0977        | 0(0-Inf)              |
| TUMOR, MALIGNANT, SEE ALSO NEOPLASM, MALIGNANT BY SITE                     | 0                                       | 0          | 3                                          | 5.3031        | 0(0-Inf)              |
| TUMOR, MERKEL CELL, CODE ALSO NEOPLASM MALIGNANT BY SITE                   | 0                                       | 0          | 5                                          | 3.904         | 0(0-Inf)              |
| TUMOR, MIXED, BENIGN, CODE ALSO NEOPLASM, BENIGN BY SITE                   | 0                                       | 0          | 31                                         | 7.3614        | 0(0-Inf)              |
| TUMOR, MIXED, MESENCHYMAL, CODE ALSO NEOPLASM MALIGNANT BY SITE            | 0                                       | 0          | 1                                          | 0.234         | 0(0-Inf)              |
| TUMOR, MIXED, MESODERMAL, CODE ALSO NEOPLASM MALIGNANT BY SITE             | 0                                       | 0          | 1                                          | 0.2354        | 0(0-Inf)              |
| TUMOR, MIXED, NOS, CODE ALSO NEOPLASM, MALIGNANT BY SITE                   | 0                                       | 0          | 13                                         | 2.9597        | 0(0-Inf)              |
| TUMOR, MULLERIAN (MIXED) CODE ALSO NEOPLASM MALIGNANT BY SITE              | 0                                       | 0          | 3                                          | 0.6548        | 0(0-Inf)              |
| TUMOR, NERVE SHEATH, SEE ALSO NEURILEMMOMA                                 | 0                                       | 0          | 5                                          | 1.7337        | 0(0-Inf)              |
| TUMOR, NEUROENDOCRINE, MALIGNANT, CODE ALSO NEOPLASM MALIGNANT BY SITE     | 0                                       | 0          | 3                                          | 3.7595        | 0(0-Inf)              |
| TUMOR, NOS, SEE ALSO NEOPLASM, NOS BY SITE                                 | 2                                       | 16.9641    | 27                                         | 10.5242       | 1.6119(0.381-6.8192)  |
| TUMOR, PANCOAST'S, NOS (MALIGNANT)                                         | 0                                       | 0          | 6                                          | 1.5768        | 0(0-Inf)              |
| TUMOR, PAPILLARY, MALIGNANT, CODE ALSO NEOPLASM MALIGNANT BY SITE          | 4                                       | 48.9479    | 64                                         | 42.3773       | 1.155(0.4196-3.1799)  |

| Description                                               | No. of Positive Cases with Disease Code | Case Rate* | No. of Positive Controls with Disease Code | Control Rate* | Relative Risk (95%CI)    |
|-----------------------------------------------------------|-----------------------------------------|------------|--------------------------------------------|---------------|--------------------------|
| TUMOR, PAPILLARY, NOS, CODE ALSO NEOPLASM, BENIGN BY SITE | 1                                       | 11.4836    | 17                                         | 10.3489       | 1.1096(0.1469-8.3836)    |
| TUMOR, SCHWANN CELL, NOS                                  | 0                                       | 0          | 2                                          | 0.6774        | 0(0-Inf)                 |
| TUMOR, SEBACEOUS                                          | 0                                       | 0          | 2                                          | 1.2662        | 0(0-Inf)                 |
| TUMOR, SUPERIOR SULCUS, MALIGNANT                         | 0                                       | 0          | 3                                          | 0.7884        | 0(0-Inf)                 |
| TUMOR, THECA CELL, NOS (OVARY)                            | 0                                       | 0          | 2                                          | 0.5909        | 0(0-Inf)                 |
| TUMOR, VASCULAR, CODE ALSO NEOPLASM BENIGN BY SITE        | 0                                       | 0          | 1                                          | 0.2729        | 0(0-Inf)                 |
| TUMOR, WARTHIN'S, PAROTID GLAND                           | 1                                       | 7.3149     | 23                                         | 7.0788        | 1.0333(0.1388-7.6934)    |
| TUMOR, WARTHIN'S, SALIVARY GLAND, NEC                     | 0                                       | 0          | 2                                          | 0.5709        | 0(0-Inf)                 |
| TUMOR, WILMS' (MALIGNANT)                                 | 0                                       | 0          | 1                                          | 0.234         | 0(0-Inf)                 |
| TWIST INJURY SEE ALSO SPRAIN BY SITE                      | 0                                       | 0          | 2                                          | 0.5474        | 0(0-Inf)                 |
| TWISTED OVARIAN PEDICLE                                   | 0                                       | 0          | 2                                          | 1.138         | 0(0-Inf)                 |
| TWITCH-EYE(LID)                                           | 1                                       | 7.0367     | 8                                          | 1.889         | 3.725(0.4571-30.357)     |
| TWITCH-MUSCLE                                             | 1                                       | 8.5799     | 15                                         | 5.9261        | 1.4478(0.1896-11.0567)   |
| TWO-CHAMBERED VENTRICLE                                   | 0                                       | 0          | 1                                          | 0.3526        | 0(0-Inf)                 |
| TYLOMA                                                    | 1                                       | 14.6849    | 2                                          | 1.6917        | 8.6805(0.77-97.8605)     |
| TYMPANOSCLEROSIS                                          | 3                                       | 22.5906    | 11                                         | 2.6856        | 8.4116(2.3057-30.6868)   |
| TYPHLITIS (SEE ALSO APPENDICITIS)                         | 0                                       | 0          | 1                                          | 0.8528        | 0(0-Inf)                 |
| ULCER, ALA (NOSE)                                         | 0                                       | 0          | 1                                          | 2.4855        | 0(0-Inf)                 |
| ULCER, ALVEOLAR PROCESS                                   | 0                                       | 0          | 3                                          | 0.6986        | 0(0-Inf)                 |
| ULCER, AMPUTATION STUMP, CODE ALSO BY SITE                | 1                                       | 16.9087    | 7                                          | 7.1165        | 2.376(0.29-19.4639)      |
| ULCER, ANAL                                               | 1                                       | 8.8615     | 37                                         | 9.1264        | 0.971(0.1326-7.1101)     |
| ULCER, ANASTOMOTIC                                        | 4                                       | 28.2288    | 22                                         | 5.896         | 4.7878(1.6295-14.0674)   |
| ULCER, ANASTOMOTIC, GASTRIC                               | 0                                       | 0          | 11                                         | 3.134         | 0(0-Inf)                 |
| ULCER, ANTRAL (STOMACH#)                                  | 19                                      | 155.2407   | 355                                        | 126.4939      | 1.2273(0.7723-1.9503)    |
| ULCER, ANTRAL, BENIGN                                     | 4                                       | 27.8076    | 35                                         | 8.5772        | 3.242(1.1422-9.2023)     |
| ULCER, APHTHOUS (MOUTH#)                                  | 11                                      | 76.7809    | 288                                        | 72.5495       | 1.0583(0.5785-1.9362)    |
| ULCER, ARTERIAL, SEE ALSO ISCHEMIC                        | 0                                       | 0          | 3                                          | 2.0939        | 0(0-Inf)                 |
| ULCER, ARTERY                                             | 4                                       | 35.8939    | 42                                         | 17.8493       | 2.0109(0.7174-5.6366)    |
| ULCER, BARRETT'S                                          | 1                                       | 9.2319     | 1                                          | 0.4541        | 20.3311(1.2309-335.8254) |
| ULCER, BILE DUCT                                          | 0                                       | 0          | 1                                          | 0.8529        | 0(0-Inf)                 |
| ULCER, BLADDER, NOS                                       | 3                                       | 24.3629    | 19                                         | 6.861         | 3.5509(1.0403-12.1202)   |
| ULCER, BLEEDING (PEPTIC#), CODE ALSO BY SITE STATED       | 1                                       | 8.7706     | 53                                         | 21.7644       | 0.403(0.0556-2.921)      |
| ULCER, BONE                                               | 0                                       | 0          | 6                                          | 2.7535        | 0(0-Inf)                 |
| ULCER, BREAST                                             | 0                                       | 0          | 7                                          | 1.6486        | 0(0-Inf)                 |
| ULCER, BUCCAL                                             | 1                                       | 6.9492     | 28                                         | 7.1412        | 0.9731(0.1316-7.1932)    |
| ULCER, CAMERON                                            | 0                                       | 0          | 14                                         | 11.6277       | 0(0-Inf)                 |
| ULCER, CARDIA                                             | 3                                       | 36.0834    | 42                                         | 26.8672       | 1.343(0.4149-4.3469)     |
| ULCER, CARDIOESOPHAGEAL                                   | 2                                       | 14.9112    | 22                                         | 6.8588        | 2.174(0.507-9.3214)      |
| ULCER, CECUM                                              | 1                                       | 8.5559     | 26                                         | 10.2237       | 0.8369(0.113-6.1978)     |

| Description                                   | No. of Positive Cases with Disease Code | Case Rate* | No. of Positive Controls with Disease Code | Control Rate* | Relative Risk (95%CI)   |
|-----------------------------------------------|-----------------------------------------|------------|--------------------------------------------|---------------|-------------------------|
| ULCER, CERVIX                                 | 0                                       | 0          | 18                                         | 8.7685        | 0(0-Inf)                |
| ULCER, COLON                                  | 3                                       | 26.3862    | 107                                        | 44.0236       | 0.5994(0.1899-1.8918)   |
| ULCER, CONJUNCTIVA                            | 0                                       | 0          | 1                                          | 0.8877        | 0(0-Inf)                |
| ULCER, CORNEA, DENDRITIC (HERPETIC#)          | 1                                       | 11.2482    | 0                                          | 0             | 7460627792.7495(0-Inf)  |
| ULCER, CORNEA, MARGINAL                       | 0                                       | 0          | 11                                         | 2.6608        | 0(0-Inf)                |
| ULCER, CORNEA, NOS                            | 0                                       | 0          | 85                                         | 20.8901       | 0(0-Inf)                |
| ULCER, CORNEA, PERFORATING                    | 0                                       | 0          | 1                                          | 2.4855        | 0(0-Inf)                |
| ULCER, CORNEAL PERFORATED                     | 0                                       | 0          | 2                                          | 0.8096        | 0(0-Inf)                |
| ULCER, DECUBITUS, LOWER EXTREMITY             | 16                                      | 239.6973   | 250                                        | 224.621       | 1.0671(0.643-1.7711)    |
| ULCER, DECUBITUS, NOS                         | 11                                      | 168.4065   | 162                                        | 149.6147      | 1.1256(0.6103-2.076)    |
| ULCER, DECUBITUS, TRUNK                       | 21                                      | 334.8187   | 238                                        | 233.2034      | 1.4357(0.9178-2.246)    |
| ULCER, DECUBITUS, UPPER EXTREMITY             | 1                                       | 15.8661    | 12                                         | 11.844        | 1.3396(0.1733-10.3578)  |
| ULCER, DIABETIC, CODE ALSO BY SITE            | 7                                       | 66.1962    | 74                                         | 33.9146       | 1.9518(0.896-4.2521)    |
| ULCER, DIEULAFOY'S                            | 0                                       | 0          | 6                                          | 2.4441        | 0(0-Inf)                |
| ULCER, DUODENAL, ACTIVE                       | 2                                       | 16.2063    | 47                                         | 11.3634       | 1.4262(0.3447-5.9006)   |
| ULCER, DUODENAL, ACUTE                        | 0                                       | 0          | 3                                          | 0.6549        | 0(0-Inf)                |
| ULCER, DUODENAL, ASYMPTOMATIC                 | 0                                       | 0          | 2                                          | 0.4681        | 0(0-Inf)                |
| ULCER, DUODENAL, BULB                         | 7                                       | 72.2456    | 120                                        | 62.5226       | 1.1555(0.538-2.4817)    |
| ULCER, DUODENAL, CHRONIC                      | 0                                       | 0          | 25                                         | 6.6917        | 0(0-Inf)                |
| ULCER, DUODENAL, NOS--DU                      | 24                                      | 174.8173   | 518                                        | 152.853       | 1.1437(0.7586-1.7243)   |
| ULCER, DUODENAL, OBSTRUCTING                  | 0                                       | 0          | 2                                          | 0.507         | 0(0-Inf)                |
| ULCER, DUODENAL, PENETRATING                  | 0                                       | 0          | 14                                         | 4.19          | 0(0-Inf)                |
| ULCER, DUODENAL, PERFORATING                  | 0                                       | 0          | 25                                         | 10.1106       | 0(0-Inf)                |
| ULCER, DUODENAL, PERFORATING, WITH HEMORRHAGE | 0                                       | 0          | 2                                          | 1.1972        | 0(0-Inf)                |
| ULCER, DUODENAL, POST-BULBAR                  | 1                                       | 7.8894     | 33                                         | 11.374        | 0.6936(0.0945-5.0926)   |
| ULCER, DUODENAL, WITH BLEEDING, CHRONIC       | 0                                       | 0          | 1                                          | 0.8276        | 0(0-Inf)                |
| ULCER, DUODENAL, WITH BLEEDING, NOS           | 7                                       | 64.7023    | 121                                        | 54.1133       | 1.1957(0.5568-2.5676)   |
| ULCER, DUODENAL, WITH BLEEDING, POST-BULBAR   | 0                                       | 0          | 12                                         | 6.2856        | 0(0-Inf)                |
| ULCER, DUODENAL, WITH CRATER                  | 0                                       | 0          | 7                                          | 1.7552        | 0(0-Inf)                |
| ULCER, DUODENAL, WITH HEMORRHAGE, NOS         | 2                                       | 13.8551    | 23                                         | 6.2462        | 2.2182(0.5193-9.4752)   |
| ULCER, DUODENAL, WITH OBSTRUCTION             | 1                                       | 7.0082     | 3                                          | 0.8043        | 8.7138(0.875-86.7776)   |
| ULCER, DUODENUM, STRESS                       | 0                                       | 0          | 1                                          | 0.234         | 0(0-Inf)                |
| ULCER, EAR CANAL                              | 0                                       | 0          | 7                                          | 3.5116        | 0(0-Inf)                |
| ULCER, EPIGLOTTIS                             | 0                                       | 0          | 1                                          | 0.8877        | 0(0-Inf)                |
| ULCER, ESOPHAGUS                              | 10                                      | 84.0964    | 227                                        | 86.4487       | 0.9728(0.5155-1.8357)   |
| ULCER, ESOPHAGUS, VARICOSE                    | 1                                       | 6.8854     | 0                                          | 0             | 12232695508.0237(0-Inf) |
| ULCER, EXTREMITY, LOWER, NOS                  | 55                                      | 686.0086   | 900                                        | 603.6655      | 1.1364(0.8649-1.4931)   |
| ULCER, EXTREMITY, LOWER, VARICOSE             | 1                                       | 7.0757     | 7                                          | 1.9349        | 3.6569(0.4417-30.2766)  |
| ULCER, EXTREMITY, UPPER, NOS                  | 7                                       | 69.2428    | 97                                         | 47.5106       | 1.4574(0.6749-3.1475)   |
| ULCER, EYE, LID REGION, NEC                   | 0                                       | 0          | 4                                          | 1.6249        | 0(0-Inf)                |

| Description                                      | No. of Positive Cases with Disease Code | Case Rate* | No. of Positive Controls with Disease Code | Control Rate* | Relative Risk (95%CI)  |
|--------------------------------------------------|-----------------------------------------|------------|--------------------------------------------|---------------|------------------------|
| ULCER, EYE, NOS                                  | 0                                       | 0          | 32                                         | 7.6741        | 0(0-Inf)               |
| ULCER, FACTITIAL, CODE ALSO BY SITE IF STATED    | 0                                       | 0          | 4                                          | 0.9751        | 0(0-Inf)               |
| ULCER, GALLBLADDER                               | 0                                       | 0          | 13                                         | 3.2424        | 0(0-Inf)               |
| ULCER, GANGRENOUS, CODE ALSO GANGRENE BY SITE    | 1                                       | 11.3739    | 14                                         | 8.4552        | 1.3452(0.1757-10.3005) |
| ULCER, GASTRIC, BENIGN                           | 4                                       | 30.4607    | 43                                         | 9.9473        | 3.0622(1.091-8.5953)   |
| ULCER, GASTRIC, BENIGN GIANT                     | 0                                       | 0          | 4                                          | 1.363         | 0(0-Inf)               |
| ULCER, GASTRIC, BLEEDING                         | 3                                       | 28.8012    | 77                                         | 36.2193       | 0.7952(0.2503-2.5267)  |
| ULCER, GASTRIC, MULTIPLE                         | 0                                       | 0          | 38                                         | 13.9001       | 0(0-Inf)               |
| ULCER, GASTRIC, NOS                              | 22                                      | 194.5441   | 361                                        | 147.054       | 1.3229(0.8588-2.0379)  |
| ULCER, GASTRIC, PENETRATING                      | 0                                       | 0          | 3                                          | 0.8115        | 0(0-Inf)               |
| ULCER, GASTRIC, PERFORATING                      | 0                                       | 0          | 10                                         | 2.5398        | 0(0-Inf)               |
| ULCER, GASTRIC, WITH HEMORRHAGE                  | 0                                       | 0          | 5                                          | 1.5654        | 0(0-Inf)               |
| ULCER, GASTROJEJUNAL                             | 0                                       | 0          | 1                                          | 0.3527        | 0(0-Inf)               |
| ULCER, GENITAL ORGAN, FEMALE, NEC                | 0                                       | 0          | 10                                         | 2.355         | 0(0-Inf)               |
| ULCER, GENITAL ORGAN, MALE                       | 0                                       | 0          | 4                                          | 1.7187        | 0(0-Inf)               |
| ULCER, GINGIVA                                   | 0                                       | 0          | 28                                         | 7.5634        | 0(0-Inf)               |
| ULCER, GUM                                       | 1                                       | 6.9779     | 14                                         | 3.671         | 1.9008(0.2472-14.6139) |
| ULCER, ILEUM                                     | 1                                       | 7.5651     | 47                                         | 14.9777       | 0.5051(0.0695-3.6724)  |
| ULCER, INTESTINE                                 | 1                                       | 9.5121     | 37                                         | 17.1233       | 0.5555(0.076-4.0616)   |
| ULCER, INTESTINE, PERFORATING                    | 0                                       | 0          | 1                                          | 0.2729        | 0(0-Inf)               |
| ULCER, ISCHEMIC, LOWER EXTREMITY                 | 6                                       | 81.0726    | 123                                        | 93.5544       | 0.8666(0.3813-1.9696)  |
| ULCER, ISCHEMIC, NOS                             | 2                                       | 26.4491    | 14                                         | 10.2765       | 2.5738(0.5809-11.4026) |
| ULCER, ISCHEMIC, TRUNK                           | 0                                       | 0          | 1                                          | 6.4841        | 0(0-Inf)               |
| ULCER, ISCHEMIC, UPPER EXTREMITY                 | 0                                       | 0          | 2                                          | 0.7897        | 0(0-Inf)               |
| ULCER, JEJUNAL                                   | 0                                       | 0          | 7                                          | 1.9823        | 0(0-Inf)               |
| ULCER, JEJUNAL, BLEEDING                         | 0                                       | 0          | 1                                          | 0.234         | 0(0-Inf)               |
| ULCER, JEJUNAL, PERFORATING                      | 0                                       | 0          | 2                                          | 0.5474        | 0(0-Inf)               |
| ULCER, LABIA, MAJOR                              | 0                                       | 0          | 2                                          | 0.8097        | 0(0-Inf)               |
| ULCER, LABIA, NOS                                | 0                                       | 0          | 8                                          | 2.2112        | 0(0-Inf)               |
| ULCER, LARYNX                                    | 0                                       | 0          | 1                                          | 0.4751        | 0(0-Inf)               |
| ULCER, LIP                                       | 4                                       | 33.7018    | 68                                         | 26.2663       | 1.2831(0.4665-3.5289)  |
| ULCER, MARGINAL                                  | 0                                       | 0          | 1                                          | 0.2729        | 0(0-Inf)               |
| ULCER, MOUTH                                     | 5                                       | 37.8793    | 96                                         | 30.2631       | 1.2517(0.5076-3.0862)  |
| ULCER, NEUROTROPHIC, CODE ALSO BY SITE IF STATED | 4                                       | 36.5825    | 72                                         | 31.5525       | 1.1594(0.4224-3.1824)  |
| ULCER, NOSE                                      | 4                                       | 28.297     | 77                                         | 20.68         | 1.3683(0.4987-3.7543)  |
| ULCER, ORAL MUCOSA                               | 5                                       | 36.6579    | 52                                         | 15.5964       | 2.3504(0.9335-5.9182)  |
| ULCER, PALATE, HARD                              | 1                                       | 7.5013     | 20                                         | 6.181         | 1.2136(0.1616-9.1136)  |
| ULCER, PALATE, NOS                               | 0                                       | 0          | 14                                         | 3.4796        | 0(0-Inf)               |
| ULCER, PALATE, SOFT                              | 1                                       | 7.2289     | 6                                          | 1.7989        | 4.0186(0.4754-33.971)  |
| ULCER, PENILE                                    | 3                                       | 48.2582    | 21                                         | 15.6781       | 3.0781(0.912-10.3887)  |

| Description                                      | No. of Positive Cases with Disease Code | Case Rate* | No. of Positive Controls with Disease Code | Control Rate* | Relative Risk (95%CI)   |
|--------------------------------------------------|-----------------------------------------|------------|--------------------------------------------|---------------|-------------------------|
| ULCER, PEPTIC, BLEEDING                          | 1                                       | 8.4888     | 11                                         | 4.2656        | 1.9901(0.2541-15.5884)  |
| ULCER, PEPTIC, NOS--PUD                          | 21                                      | 167.1244   | 513                                        | 177.0623      | 0.9439(0.6093-1.4621)   |
| ULCER, PEPTIC, PERFORATING                       | 0                                       | 0          | 2                                          | 0.6775        | 0(0-Inf)                |
| ULCER, PERIANAL                                  | 1                                       | 8.7561     | 14                                         | 5.7107        | 1.5333(0.1999-11.7608)  |
| ULCER, PERINEUM                                  | 0                                       | 0          | 11                                         | 6.8868        | 0(0-Inf)                |
| ULCER, PHARYNX                                   | 1                                       | 7.8123     | 6                                          | 1.4346        | 5.4457(0.6407-46.2843)  |
| ULCER, PREPYLORIC, BENIGN                        | 1                                       | 7.3683     | 11                                         | 2.5995        | 2.8345(0.3608-22.2677)  |
| ULCER, PREPYLORIC, NOS                           | 6                                       | 47.2212    | 90                                         | 30.7031       | 1.538(0.6706-3.5271)    |
| ULCER, PRESSURE, SEE ALSO DECUBITUS              | 8                                       | 143.7873   | 89                                         | 103.5812      | 1.3882(0.6722-2.8668)   |
| ULCER, PYLORIC, BENIGN                           | 0                                       | 0          | 1                                          | 0.234         | 0(0-Inf)                |
| ULCER, PYLORIC, CHANNEL                          | 4                                       | 32.0589    | 96                                         | 33.988        | 0.9432(0.346-2.5716)    |
| ULCER, PYLORIC, NOS                              | 3                                       | 21.7582    | 23                                         | 6.608         | 3.2927(0.9782-11.0831)  |
| ULCER, PYLORODUODENAL                            | 1                                       | 6.9553     | 6                                          | 1.5223        | 4.5688(0.537-38.869)    |
| ULCER, RECTOSIGMOID                              | 0                                       | 0          | 7                                          | 2.7938        | 0(0-Inf)                |
| ULCER, RECTUM                                    | 5                                       | 45.6161    | 60                                         | 26.1588       | 1.7438(0.6972-4.3616)   |
| ULCER, SCROTUM                                   | 0                                       | 0          | 4                                          | 5.9565        | 0(0-Inf)                |
| ULCER, SIGMOID                                   | 2                                       | 17.951     | 27                                         | 11.4548       | 1.5671(0.3703-6.6323)   |
| ULCER, SKIN, NOS                                 | 24                                      | 246.7329   | 495                                        | 255.8648      | 0.9643(0.6395-1.4541)   |
| ULCER, SKIN, PRESSURE, SEE ALSO ULCER, DECUBITUS | 0                                       | 0          | 4                                          | 1.1698        | 0(0-Inf)                |
| ULCER, STASIS, ANKLE                             | 1                                       | 8.2474     | 31                                         | 11.4722       | 0.7189(0.0977-5.2896)   |
| ULCER, STASIS, FOOT                              | 0                                       | 0          | 3                                          | 1.511         | 0(0-Inf)                |
| ULCER, STASIS, LEG                               | 5                                       | 52.0999    | 81                                         | 43.1954       | 1.2061(0.4874-2.985)    |
| ULCER, STASIS, NOS                               | 4                                       | 40.8678    | 79                                         | 40.7388       | 1.0032(0.3664-2.7469)   |
| ULCER, STERCORAL                                 | 0                                       | 0          | 1                                          | 0.4049        | 0(0-Inf)                |
| ULCER, STOMACH                                   | 4                                       | 33.7496    | 69                                         | 26.444        | 1.2763(0.4641-3.51)     |
| ULCER, STOMACH, MALIGNANT                        | 0                                       | 0          | 4                                          | 1.968         | 0(0-Inf)                |
| ULCER, STOMACH, PENETRATING                      | 1                                       | 79.9291    | 0                                          | 0             | 118089898915.933(0-Inf) |
| ULCER, STOMACH, STRESS                           | 0                                       | 0          | 1                                          | 0.8877        | 0(0-Inf)                |
| ULCER, STOMACH, WITH HEMORRHAGE                  | 0                                       | 0          | 3                                          | 2.0948        | 0(0-Inf)                |
| ULCER, STOMAL, SEE ALSO ULCER, GASTROJEJUNAL     | 0                                       | 0          | 13                                         | 3.6566        | 0(0-Inf)                |
| ULCER, TESTIS                                    | 0                                       | 0          | 1                                          | 2.4856        | 0(0-Inf)                |
| ULCER, TONGUE                                    | 1                                       | 7.4581     | 67                                         | 20.6319       | 0.3615(0.0501-2.6101)   |
| ULCER, TONSIL                                    | 0                                       | 0          | 5                                          | 1.2369        | 0(0-Inf)                |
| ULCER, TRACHEA                                   | 0                                       | 0          | 2                                          | 1.1972        | 0(0-Inf)                |
| ULCER, TRAUMATIC, CODE ALSO BY SITE IF STATED    | 10                                      | 90.8887    | 183                                        | 78.0929       | 1.1639(0.6146-2.2041)   |
| ULCER, TROPHIC, CODE ALSO BY SITE IF STATED      | 0                                       | 0          | 2                                          | 0.432         | 0(0-Inf)                |
| ULCER, TRUNK, NOS                                | 17                                      | 216.3648   | 208                                        | 147.6391      | 1.4655(0.8923-2.4069)   |
| ULCER, UMBILICUS                                 | 0                                       | 0          | 5                                          | 2.0351        | 0(0-Inf)                |
| ULCER, URETHRA                                   | 0                                       | 0          | 2                                          | 0.5708        | 0(0-Inf)                |
| ULCER, UTERUS                                    | 0                                       | 0          | 1                                          | 0.398         | 0(0-Inf)                |



| Description                             | No. of Positive Cases with Disease Code | Case Rate* | No. of Positive Controls with Disease Code | Control Rate* | Relative Risk (95%CI)  |
|-----------------------------------------|-----------------------------------------|------------|--------------------------------------------|---------------|------------------------|
| ULCER, VAGINAL                          | 1                                       | 13.8306    | 39                                         | 17.9153       | 0.772(0.1055-5.6474)   |
| ULCER, VALVE, HEART                     | 0                                       | 0          | 1                                          | 0.234         | 0(0-Inf)               |
| ULCER, VENOUS, SEE ALSO STASIS          | 2                                       | 25.9232    | 35                                         | 25.3592       | 1.0222(0.245-4.265)    |
| ULCER, VOCAL CORD                       | 0                                       | 0          | 12                                         | 3.3758        | 0(0-Inf)               |
| ULCER, VULVA                            | 0                                       | 0          | 20                                         | 9.769         | 0(0-Inf)               |
| ULERYTHEMA OPHRYOGENES                  | 0                                       | 0          | 1                                          | 0.8877        | 0(0-Inf)               |
| ULNAR, PLUS VARIANCE                    | 0                                       | 0          | 1                                          | 0.8528        | 0(0-Inf)               |
| UNCONSCIOUS-SEE ALSO DISORDER           | 0                                       | 0          | 11                                         | 4.1546        | 0(0-Inf)               |
| UNCONTROLLABLE CRYING                   | 0                                       | 0          | 8                                          | 5.9689        | 0(0-Inf)               |
| UNDERWEIGHT                             | 0                                       | 0          | 25                                         | 10.4871       | 0(0-Inf)               |
| UNDESCENDED TESTICLE                    | 1                                       | 15.4556    | 15                                         | 8.1269        | 1.9018(0.2496-14.4931) |
| UNEQUAL PUPILS                          | 0                                       | 0          | 3                                          | 0.8457        | 0(0-Inf)               |
| UNERUPTED TOOTH                         | 1                                       | 12.5552    | 9                                          | 2.6648        | 4.7115(0.5881-37.7484) |
| UNEXTRACTED DENTAL ROOT                 | 0                                       | 0          | 2                                          | 0.6309        | 0(0-Inf)               |
| UNHEALED WOUND, NOS (SEE ALSO ULCER)    | 1                                       | 20.5752    | 4                                          | 5.3381        | 3.8544(0.4265-34.8309) |
| UNHEALED WOUND, POST OPERATIVE          | 9                                       | 79.6428    | 119                                        | 49.2799       | 1.6161(0.8183-3.192)   |
| UNINHIBITED BLADDER-SEE ALSO NEUROGENIC | 0                                       | 0          | 11                                         | 6.5042        | 0(0-Inf)               |
| UNSTABLE, BLADDER                       | 1                                       | 10.592     | 34                                         | 18.446        | 0.5742(0.0784-4.2079)  |
| UNSTABLE, DETRUSOR                      | 12                                      | 122.5794   | 175                                        | 89.911        | 1.3633(0.758-2.4521)   |
| UNSTABLE, JOINT, NOS                    | 0                                       | 0          | 5                                          | 1.2019        | 0(0-Inf)               |
| UNSTABLE, KNEE                          | 1                                       | 7.024      | 6                                          | 1.4785        | 4.7509(0.56-40.3046)   |
| UNSTABLE, SPINE                         | 0                                       | 0          | 4                                          | 1.012         | 0(0-Inf)               |
| UNSTEADINESS (ORTHOSTATIC)              | 15                                      | 169.2815   | 287                                        | 169.6379      | 0.9979(0.593-1.6792)   |
| UNSTEADY GAIT                           | 42                                      | 654.53     | 822                                        | 771.2427      | 0.8487(0.622-1.1579)   |
| UPSET, GASTROINTESTINAL/GI              | 1                                       | 8.9516     | 24                                         | 10.1601       | 0.8811(0.1185-6.548)   |
| UPSET, INTESTINAL/INTESTINE             | 0                                       | 0          | 1                                          | 0.853         | 0(0-Inf)               |
| UPSET, STOMACH/GASTRIC                  | 0                                       | 0          | 27                                         | 16.0804       | 0(0-Inf)               |
| UREMIA, NOS                             | 1                                       | 13.4028    | 34                                         | 25.733        | 0.5208(0.0711-3.8144)  |
| URETERECTASIS                           | 0                                       | 0          | 14                                         | 4.7906        | 0(0-Inf)               |
| URETERITIS                              | 2                                       | 18.3946    | 10                                         | 4.4076        | 4.1734(0.9029-19.2908) |
| URETEROCELE, ACQUIRED                   | 0                                       | 0          | 7                                          | 1.9845        | 0(0-Inf)               |
| URETEROCELE, NOS                        | 0                                       | 0          | 10                                         | 2.7648        | 0(0-Inf)               |
| URETEROLITHIASIS                        | 6                                       | 41.5535    | 80                                         | 21.243        | 1.9561(0.8501-4.5009)  |
| URETHRITIS, ACUTE                       | 0                                       | 0          | 3                                          | 0.7461        | 0(0-Inf)               |
| URETHRITIS, CHRONIC                     | 0                                       | 0          | 30                                         | 7.7143        | 0(0-Inf)               |
| URETHRITIS, GRANULAR                    | 0                                       | 0          | 6                                          | 1.2967        | 0(0-Inf)               |
| URETHRITIS, NOS                         | 13                                      | 108.0888   | 317                                        | 79.0931       | 1.3666(0.7834-2.3841)  |
| URETHROCELE, FEMALE, GR 1               | 0                                       | 0          | 3                                          | 0.7022        | 0(0-Inf)               |
| URETHROCELE, FEMALE, GR 2               | 0                                       | 0          | 2                                          | 0.5837        | 0(0-Inf)               |
| URETHROCELE, FEMALE, GR 4               | 0                                       | 0          | 1                                          | 0.234         | 0(0-Inf)               |

| Description                                                  | No. of Positive Cases with Disease Code | Case Rate* | No. of Positive Controls with Disease Code | Control Rate* | Relative Risk (95%CI)   |
|--------------------------------------------------------------|-----------------------------------------|------------|--------------------------------------------|---------------|-------------------------|
| URETHROCELE, FEMALE, NOS                                     | 0                                       | 0          | 17                                         | 7.3526        | 0(0-Inf)                |
| URETHROCYSTOCELE, GR 1                                       | 0                                       | 0          | 5                                          | 1.2606        | 0(0-Inf)                |
| URETHROCYSTOCELE, GR 2                                       | 0                                       | 0          | 7                                          | 1.5159        | 0(0-Inf)                |
| URETHROCYSTOCELE, GR 3                                       | 0                                       | 0          | 5                                          | 1.2716        | 0(0-Inf)                |
| URETHROCYSTOCELE, NOS                                        | 2                                       | 35.0777    | 34                                         | 15.2665       | 2.2977(0.548-9.6334)    |
| URETHROLITHIASIS-SEE ALSO CALCULUS                           | 0                                       | 0          | 5                                          | 1.2652        | 0(0-Inf)                |
| URETHROTRIGONITIS, CHRONIC                                   | 0                                       | 0          | 22                                         | 11.8444       | 0(0-Inf)                |
| URETHROTRIGONITIS, NOS                                       | 2                                       | 15.0778    | 34                                         | 7.453         | 2.0231(0.4823-8.4851)   |
| URETHROTRIGONITIS, RECURRENT                                 | 0                                       | 0          | 5                                          | 1.0846        | 0(0-Inf)                |
| URGENCY (URINARY)                                            | 33                                      | 311.0895   | 795                                        | 361.4554      | 0.8607(0.607-1.2202)    |
| URGENCY, HYPERTENSIVE                                        | 2                                       | 21.4237    | 63                                         | 36.7943       | 0.5823(0.1421-2.3855)   |
| URICOSURIA                                                   | 0                                       | 0          | 1                                          | 0.3526        | 0(0-Inf)                |
| URINOMA, NEC                                                 | 0                                       | 0          | 1                                          | 0.3526        | 0(0-Inf)                |
| URINOMA, URETER                                              | 1                                       | 6.8832     | 0                                          | 0             | 12230274177.3502(0-Inf) |
| UROPATHY, OBSTRUCTIVE                                        | 4                                       | 48.3293    | 123                                        | 80.7139       | 0.5988(0.2209-1.6229)   |
| UROSEPSIS (CODE ALSO URINARY TRACT INFECTION TYPE SPECIFIED) | 21                                      | 302.3952   | 234                                        | 196.1132      | 1.5419(0.9852-2.4134)   |
| URTICARIA, ACUTE                                             | 0                                       | 0          | 123                                        | 28.7698       | 0(0-Inf)                |
| URTICARIA, ALLERGIC                                          | 3                                       | 21.08      | 85                                         | 20.1901       | 1.0441(0.329-3.3136)    |
| URTICARIA, CHOLINERGIC                                       | 0                                       | 0          | 7                                          | 1.6965        | 0(0-Inf)                |
| URTICARIA, CHRONIC                                           | 2                                       | 14.3445    | 104                                        | 24.0178       | 0.5972(0.147-2.4261)    |
| URTICARIA, COLD (FAMILIAL)                                   | 0                                       | 0          | 10                                         | 2.4332        | 0(0-Inf)                |
| URTICARIA, GIANT                                             | 0                                       | 0          | 1                                          | 0.2354        | 0(0-Inf)                |
| URTICARIA, MEDICAMENTOSA, DUE TO DRUG APPLIED TO SKIN        | 0                                       | 0          | 13                                         | 3.1607        | 0(0-Inf)                |
| URTICARIA, NOS                                               | 18                                      | 128.2564   | 831                                        | 202.4798      | 0.6334(0.3968-1.0113)   |
| URTICARIA, PAPULAR                                           | 1                                       | 7.661      | 24                                         | 5.4863        | 1.3964(0.1875-10.3985)  |
| URTICARIA, PIGMENTOSA                                        | 0                                       | 0          | 5                                          | 1.2653        | 0(0-Inf)                |
| URTICARIA, SOLAR                                             | 0                                       | 0          | 3                                          | 0.8018        | 0(0-Inf)                |
| UVEITIS, ANTERIOR                                            | 4                                       | 28.5607    | 59                                         | 16.3642       | 1.7453(0.6307-4.8295)   |
| UVEITIS, FUCHS                                               | 0                                       | 0          | 5                                          | 1.3911        | 0(0-Inf)                |
| UVEITIS, GRANULOMATOUS                                       | 0                                       | 0          | 2                                          | 0.7896        | 0(0-Inf)                |
| UVEITIS, HETEROCHROMIC                                       | 0                                       | 0          | 4                                          | 1.0306        | 0(0-Inf)                |
| UVEITIS, INACTIVE                                            | 0                                       | 0          | 1                                          | 0.2729        | 0(0-Inf)                |
| UVEITIS, NOS                                                 | 3                                       | 21.0224    | 72                                         | 18.8702       | 1.1141(0.3497-3.5494)   |
| UVEITIS, OLD                                                 | 0                                       | 0          | 9                                          | 2.5382        | 0(0-Inf)                |
| UVEITIS, POSTERIOR                                           | 2                                       | 14.3751    | 6                                          | 1.4082        | 10.208(2.0039-51.9998)  |
| UVULITIS                                                     | 0                                       | 0          | 6                                          | 1.5424        | 0(0-Inf)                |
| VACCINATION, BCG                                             | 0                                       | 0          | 5                                          | 1.2651        | 0(0-Inf)                |
| VACCINATION, DIPHTHERIA ALONE--VDIP                          | 1                                       | 7.5215     | 72                                         | 17.2352       | 0.4364(0.0605-3.1475)   |

| Description                                                         | No. of Positive Cases with Disease Code | Case Rate* | No. of Positive Controls with Disease Code | Control Rate* | Relative Risk (95%CI)  |
|---------------------------------------------------------------------|-----------------------------------------|------------|--------------------------------------------|---------------|------------------------|
| VACCINATION, DTP (DIPHtheria-TETANUS -PERTUSSIS ANTIGEN COMP)--VDPT | 0                                       | 0          | 2                                          | 0.5069        | 0(0-Inf)               |
| VACCINATION, FLU, NOS                                               | 2                                       | 17.1335    | 59                                         | 23.2498       | 0.7369(0.1795-3.0253)  |
| VACCINATION, GAMMA GLOBULIN                                         | 0                                       | 0          | 11                                         | 4.1374        | 0(0-Inf)               |
| VACCINATION, HEPATITIS                                              | 0                                       | 0          | 21                                         | 5.091         | 0(0-Inf)               |
| VACCINATION, HIB                                                    | 0                                       | 0          | 1                                          | 0.2354        | 0(0-Inf)               |
| VACCINATION, INFLUENZA--VIFL                                        | 6                                       | 47.1041    | 83                                         | 27.8235       | 1.693(0.7363-3.8924)   |
| VACCINATION, MANTOUX (TEST)                                         | 0                                       | 0          | 1                                          | 2.4858        | 0(0-Inf)               |
| VACCINATION, NEC / NOS                                              | 14                                      | 105.5308   | 633                                        | 199.6         | 0.5287(0.3111-0.8987)  |
| VACCINATION, POLIOMYELITIS--VOPV                                    | 0                                       | 0          | 3                                          | 0.6986        | 0(0-Inf)               |
| VACCINATION, PROPHYLACTIC IMMUNE SERA                               | 2                                       | 15.0647    | 12                                         | 2.9798        | 5.0556(1.1153-22.9165) |
| VACCINATION, RABIES                                                 | 0                                       | 0          | 14                                         | 3.4459        | 0(0-Inf)               |
| VACCINATION, TETANUS TOXOID--VTET                                   | 2                                       | 14.825     | 148                                        | 35.3197       | 0.4197(0.1038-1.6968)  |
| VACCINATION, TYPHOID                                                | 0                                       | 0          | 1                                          | 0.2729        | 0(0-Inf)               |
| VACCINATION, TYPHUS                                                 | 0                                       | 0          | 1                                          | 0.2729        | 0(0-Inf)               |
| VACCINATION, YELLOW FEVER                                           | 0                                       | 0          | 2                                          | 0.432         | 0(0-Inf)               |
| VAGINISMUS                                                          | 0                                       | 0          | 5                                          | 1.1118        | 0(0-Inf)               |
| VAGINITIS, ACUTE                                                    | 0                                       | 0          | 3                                          | 0.7064        | 0(0-Inf)               |
| VAGINITIS, ATROPHIC                                                 | 32                                      | 238.5297   | 1536                                       | 423.4502      | 0.5633(0.3966-0.8)     |
| VAGINITIS, CANDIDAL                                                 | 0                                       | 0          | 90                                         | 43.893        | 0(0-Inf)               |
| VAGINITIS, CHEMICAL                                                 | 0                                       | 0          | 3                                          | 0.6548        | 0(0-Inf)               |
| VAGINITIS, CHRONIC                                                  | 1                                       | 13.9415    | 19                                         | 8.5205        | 1.6362(0.2169-12.3413) |
| VAGINITIS, FUNGAL                                                   | 1                                       | 13.776     | 13                                         | 6.1798        | 2.2292(0.2876-17.2814) |
| VAGINITIS, GARDNERELLA                                              | 0                                       | 0          | 29                                         | 14.3801       | 0(0-Inf)               |
| VAGINITIS, HEMOPHILUS                                               | 6                                       | 236.502    | 227                                        | 164.5056      | 1.4377(0.6385-3.2371)  |
| VAGINITIS, MONILIA                                                  | 15                                      | 455.4155   | 738                                        | 467.5354      | 0.9741(0.5838-1.6252)  |
| VAGINITIS, NOS                                                      | 12                                      | 109.3044   | 649                                        | 153.4397      | 0.7124(0.4021-1.2621)  |
| VAGINITIS, POST-MENOPAUSAL                                          | 0                                       | 0          | 7                                          | 1.5345        | 0(0-Inf)               |
| VAGINITIS, RECURRENT                                                | 2                                       | 29.0848    | 33                                         | 14.3593       | 2.0255(0.4822-8.509)   |
| VAGINITIS, TRICHOMONAL                                              | 4                                       | 160.925    | 101                                        | 74.0013       | 2.1746(0.7993-5.9165)  |
| VAGINITIS, UREAPLASMA                                               | 0                                       | 0          | 1                                          | 0.234         | 0(0-Inf)               |
| VAGINITIS, YEAST                                                    | 6                                       | 84.6075    | 258                                        | 136.8431      | 0.6183(0.2747-1.3915)  |
| VAGINOSIS-SEE ALSO VAGINITIS                                        | 0                                       | 0          | 99                                         | 46.1631       | 0(0-Inf)               |
| VAGOTONIA                                                           | 0                                       | 0          | 3                                          | 0.9167        | 0(0-Inf)               |
| VALGUS, FOOT, CONGENITAL                                            | 0                                       | 0          | 13                                         | 3.3464        | 0(0-Inf)               |
| VALGUS, GENU, NOS (KNEE)                                            | 2                                       | 15.9161    | 59                                         | 20.5847       | 0.7732(0.1882-3.1763)  |
| VALGUS, HALLUX, NOS                                                 | 0                                       | 0          | 16                                         | 3.6123        | 0(0-Inf)               |
| VARICELLA, HERPETIC, SEE ALSO HERPES                                | 0                                       | 0          | 3                                          | 1.9773        | 0(0-Inf)               |
| VARICELLA, NOS                                                      | 1                                       | 8.2972     | 8                                          | 3.0065        | 2.7597(0.3403-22.3782) |
| VARICELLA, ZOSTER                                                   | 2                                       | 14.9193    | 47                                         | 14.3224       | 1.0417(0.2518-4.3088)  |

| Description                                                    | No. of Positive Cases with Disease Code | Case Rate* | No. of Positive Controls with Disease Code | Control Rate* | Relative Risk (95%CI)    |
|----------------------------------------------------------------|-----------------------------------------|------------|--------------------------------------------|---------------|--------------------------|
| VARICOCELE, NOS                                                | 3                                       | 22.1353    | 139                                        | 37.361        | 0.5925(0.1885-1.8619)    |
| VARICOCELE, PERINEUM                                           | 0                                       | 0          | 1                                          | 0.8542        | 0(0-Inf)                 |
| VARICOCELE, SCROTUM                                            | 0                                       | 0          | 4                                          | 1.5896        | 0(0-Inf)                 |
| VARICOSE, VEIN, NEC, SEE ALSO VARIX                            | 3                                       | 23.2064    | 184                                        | 60.445        | 0.3839(0.1225-1.2032)    |
| VARICOSE, VEINS, LOWER EXTREMITY--VV (USE FOR NOS)             | 62                                      | 482.8068   | 1682                                       | 417.3829      | 1.1567(0.897-1.4917)     |
| VARICOSITIES (NOS) SEE ALSO VARICOSE/ VARIX                    | 3                                       | 22.8332    | 158                                        | 50.2659       | 0.4542(0.1447-1.4259)    |
| VARIX, ANUS, SEE ALSO HEMORRHOIDS                              | 1                                       | 9.9224     | 1                                          | 0.4941        | 20.0814(1.2004-335.9493) |
| VARIX, BLADDER                                                 | 1                                       | 11.4644    | 2                                          | 1.2096        | 9.4778(0.8357-107.4902)  |
| VARIX, BLEEDING, NEC / NOS (CODE ALSO VARIX BY SITE IF STATED) | 1                                       | 8.8762     | 27                                         | 11.3034       | 0.7853(0.1062-5.8044)    |
| VARIX, COLON (SIGMOID)                                         | 0                                       | 0          | 2                                          | 0.5475        | 0(0-Inf)                 |
| VARIX, ESOPHAGEAL                                              | 7                                       | 53.374     | 66                                         | 21.3361       | 2.5016(1.142-5.4796)     |
| VARIX, ESOPHAGEAL BLEEDING                                     | 3                                       | 21.0414    | 8                                          | 2.1707        | 9.6934(2.5179-37.3181)   |
| VARIX, LABIA                                                   | 0                                       | 0          | 7                                          | 1.6021        | 0(0-Inf)                 |
| VARIX, LOWER EXTREMITY                                         | 0                                       | 0          | 12                                         | 2.938         | 0(0-Inf)                 |
| VARIX, PERINEUM                                                | 1                                       | 7.2216     | 0                                          | 0             | 12746788512.6407(0-Inf)  |
| VARIX, PHARYNX                                                 | 0                                       | 0          | 1                                          | 0.4751        | 0(0-Inf)                 |
| VARIX, RETINAL                                                 | 0                                       | 0          | 1                                          | 0.2354        | 0(0-Inf)                 |
| VARIX, SCROTUM                                                 | 0                                       | 0          | 3                                          | 1.0578        | 0(0-Inf)                 |
| VARIX, SPECIFIED SITE, NEC                                     | 5                                       | 36.0183    | 85                                         | 24.5008       | 1.4701(0.5943-3.6368)    |
| VARIX, SPLEEN                                                  | 0                                       | 0          | 1                                          | 0.2354        | 0(0-Inf)                 |
| VARIX, STOMAL                                                  | 0                                       | 0          | 1                                          | 0.234         | 0(0-Inf)                 |
| VARIX, VULVA                                                   | 0                                       | 0          | 1                                          | 0.234         | 0(0-Inf)                 |
| VARUS, COXA, NOS (HIP)                                         | 0                                       | 0          | 1                                          | 0.2354        | 0(0-Inf)                 |
| VARUS, FOOT (CONGENITAL)                                       | 0                                       | 0          | 5                                          | 1.2092        | 0(0-Inf)                 |
| VARUS, GENU, NOS (KNEE)                                        | 1                                       | 7.5613     | 44                                         | 14.0719       | 0.5373(0.0738-3.9126)    |
| VARUS, HALLUX, NOS (BIG TOE)                                   | 0                                       | 0          | 5                                          | 1.1414        | 0(0-Inf)                 |
| VASCULAR REACTOR                                               | 0                                       | 0          | 2                                          | 0.7052        | 0(0-Inf)                 |
| VASCULARIZATION, CORNEA                                        | 0                                       | 0          | 4                                          | 1.3631        | 0(0-Inf)                 |
| VASCULARIZATION, CORNEA, DEEP                                  | 0                                       | 0          | 1                                          | 0.2729        | 0(0-Inf)                 |
| VASCULARIZATION, CORNEA, LOCALIZED                             | 0                                       | 0          | 1                                          | 0.8877        | 0(0-Inf)                 |
| VASCULITIS, ALLERGIC                                           | 0                                       | 0          | 3                                          | 1.2701        | 0(0-Inf)                 |
| VASCULITIS, CNS                                                | 0                                       | 0          | 3                                          | 0.9165        | 0(0-Inf)                 |
| VASCULITIS, GRANULOMATOUS                                      | 1                                       | 7.7864     | 2                                          | 0.6823        | 11.4119(0.9973-130.5827) |
| VASCULITIS, HYPOCOMPLEMENTEMIC                                 | 0                                       | 0          | 2                                          | 1.1616        | 0(0-Inf)                 |
| VASCULITIS, LEUKOCYTOCLASTIC                                   | 0                                       | 0          | 12                                         | 3.6544        | 0(0-Inf)                 |
| VASCULITIS, LIVEDOID                                           | 0                                       | 0          | 6                                          | 1.9224        | 0(0-Inf)                 |
| VASCULITIS, LYMPHATIC                                          | 2                                       | 14.1028    | 7                                          | 1.6829        | 8.3803(1.6998-41.3165)   |
| VASCULITIS, NECROTIZING                                        | 1                                       | 6.9454     | 19                                         | 4.7721        | 1.4554(0.1931-10.9717)   |
| VASCULITIS, NODULAR                                            | 0                                       | 0          | 2                                          | 0.6774        | 0(0-Inf)                 |

| Description                                         | No. of Positive Cases with Disease Code | Case Rate* | No. of Positive Controls with Disease Code | Control Rate* | Relative Risk (95%CI)  |
|-----------------------------------------------------|-----------------------------------------|------------|--------------------------------------------|---------------|------------------------|
| VASCULITIS, NOS                                     | 6                                       | 42.1809    | 76                                         | 19.9854       | 2.1106(0.9146-4.8704)  |
| VASCULITIS, RETINAL                                 | 0                                       | 0          | 2                                          | 0.5838        | 0(0-Inf)               |
| VASCULITIS, SYSTEMIC                                | 1                                       | 7.8107     | 10                                         | 3.3767        | 2.3131(0.2923-18.3035) |
| VASCULITIS, URTICARIAL                              | 1                                       | 6.9349     | 23                                         | 5.7167        | 1.2131(0.1626-9.0506)  |
| VASCULOPATHY- HYPERSENSITIVE                        | 0                                       | 0          | 3                                          | 0.9165        | 0(0-Inf)               |
| VASODEPRESSOR (SYNCOPE) (PRE-SYNCOPE)               | 5                                       | 49.479     | 79                                         | 38.8328       | 1.2742(0.5144-3.1558)  |
| VASODILATION                                        | 0                                       | 0          | 4                                          | 1.9684        | 0(0-Inf)               |
| VASOSPASM, NOS                                      | 2                                       | 13.9786    | 54                                         | 12.9301       | 1.0811(0.2624-4.4533)  |
| VEGETATIVE STATE (CNS)                              | 0                                       | 0          | 1                                          | 0.8528        | 0(0-Inf)               |
| VENOUS, HUM                                         | 0                                       | 0          | 1                                          | 0.4751        | 0(0-Inf)               |
| VENOUS, LAKE (DERM DIAG)                            | 2                                       | 17.7115    | 76                                         | 31.7131       | 0.5585(0.1369-2.2791)  |
| VENOUS, LAKE, LIP                                   | 1                                       | 7.9238     | 18                                         | 6.2437        | 1.2691(0.1682-9.5771)  |
| VENOUS, LAKE, NOS                                   | 3                                       | 21.0161    | 24                                         | 6.3289        | 3.3207(0.99-11.1387)   |
| VENOUS, STARS, NOS                                  | 0                                       | 0          | 1                                          | 0.2354        | 0(0-Inf)               |
| VENOUS, STASIS                                      | 2                                       | 24.293     | 61                                         | 40.6496       | 0.5976(0.1458-2.4495)  |
| VERRUCA, NOS (LESION)                               | 49                                      | 375.8344   | 1241                                       | 308.1772      | 1.2195(0.9158-1.624)   |
| VERRUCA, PLANTAR                                    | 4                                       | 28.6307    | 116                                        | 32.9634       | 0.8686(0.3198-2.3593)  |
| VERTEBRA PLANA                                      | 0                                       | 0          | 1                                          | 0.4048        | 0(0-Inf)               |
| VERTICILLATE CORNEA                                 | 0                                       | 0          | 10                                         | 7.4275        | 0(0-Inf)               |
| VERTIGO, BENIGN PAROXYSMAL -- BPV                   | 15                                      | 136.0824   | 354                                        | 151.8211      | 0.8963(0.5339-1.5047)  |
| VERTIGO, LABYRINTHINE                               | 5                                       | 35.2796    | 56                                         | 15.0425       | 2.3453(0.934-5.889)    |
| VERTIGO, NOS                                        | 59                                      | 490.8935   | 1420                                       | 508.0208      | 0.9663(0.7442-1.2547)  |
| VERTIGO, POSITIONAL                                 | 64                                      | 511.3205   | 1664                                       | 551.883       | 0.9265(0.7213-1.1901)  |
| VERTIGO, POSTURAL                                   | 10                                      | 70.4549    | 145                                        | 35.1517       | 2.0043(1.0521-3.8182)  |
| VESICLE-SEE ALSO ERUPTION (SKIN #)                  | 1                                       | 9.5288     | 10                                         | 4.731         | 2.0141(0.2556-15.868)  |
| VESICULITIS, SEMINAL                                | 0                                       | 0          | 2                                          | 0.6775        | 0(0-Inf)               |
| VESTIBULITIS, EAR                                   | 1                                       | 7.2363     | 23                                         | 6.6053        | 1.0955(0.1469-8.1673)  |
| VESTIBULITIS, NOSE                                  | 8                                       | 57.3931    | 146                                        | 34.6698       | 1.6554(0.8099-3.3836)  |
| VILLOUS (TUBULAR) ADENOMA CODE ALSO ADENOMA BY SITE | 9                                       | 68.6282    | 225                                        | 72.6588       | 0.9445(0.4842-1.8424)  |
| VIREMIA                                             | 2                                       | 14.9641    | 27                                         | 6.248         | 2.395(0.5646-10.1601)  |
| VITILIGO, NOS                                       | 4                                       | 28.2655    | 107                                        | 25.7719       | 1.0968(0.403-2.985)    |
| VITREITIS                                           | 0                                       | 0          | 7                                          | 1.662         | 0(0-Inf)               |
| VOLVULUS, CECUM                                     | 0                                       | 0          | 12                                         | 3.1143        | 0(0-Inf)               |
| VOLVULUS, COLON                                     | 3                                       | 27.2478    | 26                                         | 11.2914       | 2.4131(0.7246-8.0361)  |
| VOLVULUS, SIGMOID                                   | 1                                       | 9.4406     | 14                                         | 6.4384        | 1.4663(0.1912-11.242)  |
| VOLVULUS, SMALL INTESTINE                           | 1                                       | 8.7552     | 22                                         | 8.9789        | 0.9751(0.1307-7.2765)  |
| VOLVULUS, STOMACH, SEE ALSO MALPOSITION             | 0                                       | 0          | 6                                          | 3.9549        | 0(0-Inf)               |
| VOMITING, ALLERGIC                                  | 0                                       | 0          | 7                                          | 1.9656        | 0(0-Inf)               |
| VOMITING, CYCLICAL                                  | 0                                       | 0          | 2                                          | 1.2662        | 0(0-Inf)               |
| VOMITING, FUNCTIONAL                                | 0                                       | 0          | 4                                          | 0.8642        | 0(0-Inf)               |

| Description                         | No. of Positive Cases with Disease Code | Case Rate* | No. of Positive Controls with Disease Code | Control Rate* | Relative Risk (95%CI)   |
|-------------------------------------|-----------------------------------------|------------|--------------------------------------------|---------------|-------------------------|
| VOMITING, NOS                       | 44                                      | 446.073    | 881                                        | 445.9143      | 1.0004(0.7384-1.3552)   |
| VON BRUNN'S CELLS (NEST)            | 0                                       | 0          | 1                                          | 0.3527        | 0(0-Inf)                |
| VULNERABLE, ADULT                   | 0                                       | 0          | 13                                         | 13.0886       | 0(0-Inf)                |
| VULVITIS, ATROPHIC                  | 0                                       | 0          | 19                                         | 12.1377       | 0(0-Inf)                |
| VULVITIS, CHRONIC                   | 0                                       | 0          | 8                                          | 2.9812        | 0(0-Inf)                |
| VULVITIS, NOS                       | 6                                       | 88.1431    | 131                                        | 57.3558       | 1.5368(0.6755-3.496)    |
| VULVITIS, RECURRENT                 | 0                                       | 0          | 4                                          | 0.8841        | 0(0-Inf)                |
| VULVOVAGINITIS, ATROPHIC            | 0                                       | 0          | 47                                         | 26.7298       | 0(0-Inf)                |
| VULVOVAGINITIS, CHRONIC             | 0                                       | 0          | 4                                          | 1.04          | 0(0-Inf)                |
| VULVOVAGINITIS, MONILIAL            | 3                                       | 48.0919    | 147                                        | 64.6231       | 0.7442(0.2367-2.3393)   |
| VULVOVAGINITIS, NOS                 | 3                                       | 22.4542    | 70                                         | 15.2384       | 1.4735(0.4618-4.7016)   |
| VULVOVAGINITIS, RECURRENT           | 0                                       | 0          | 3                                          | 0.9776        | 0(0-Inf)                |
| VULVOVAGINITIS, YEAST               | 0                                       | 0          | 20                                         | 13.3175       | 0(0-Inf)                |
| WALDENSTROM'S HYPERGLOBULINEMIA     | 2                                       | 16.292     | 0                                          | 0             | 20330010794.5885(0-Inf) |
| WANDERING, PACEMAKER                | 2                                       | 17.4234    | 16                                         | 6.4641        | 2.6954(0.6132-11.8484)  |
| WART, INFECTIOUS                    | 0                                       | 0          | 2                                          | 0.5475        | 0(0-Inf)                |
| WART, NOS                           | 30                                      | 230.655    | 855                                        | 208.052       | 1.1086(0.7695-1.5972)   |
| WART, PLANTAR                       | 15                                      | 119.4509   | 365                                        | 89.4014       | 1.3361(0.7959-2.243)    |
| WART, SEBORRHEIC                    | 0                                       | 0          | 2                                          | 0.7965        | 0(0-Inf)                |
| WART, VENEREAL                      | 0                                       | 0          | 6                                          | 1.5422        | 0(0-Inf)                |
| WART, VIRAL                         | 1                                       | 6.9667     | 9                                          | 2.4628        | 2.8287(0.3537-22.6224)  |
| WASTING, GENERALIZED                | 0                                       | 0          | 2                                          | 2.5428        | 0(0-Inf)                |
| WASTING, MUSCLE                     | 0                                       | 0          | 9                                          | 2.7983        | 0(0-Inf)                |
| WASTING, POTASSIUM (RENAL)          | 0                                       | 0          | 1                                          | 0.8528        | 0(0-Inf)                |
| WATER BRASH                         | 0                                       | 0          | 1                                          | 0.8534        | 0(0-Inf)                |
| WATER LOADING                       | 0                                       | 0          | 2                                          | 0.7898        | 0(0-Inf)                |
| WATERMELON, STOMACH                 | 0                                       | 0          | 11                                         | 7.4717        | 0(0-Inf)                |
| WEAK, ANAL SPHINCTER                | 1                                       | 11.8787    | 7                                          | 4.4861        | 2.6479(0.3219-21.7817)  |
| WEAK, BLADDER SPHINCTER             | 0                                       | 0          | 2                                          | 0.4709        | 0(0-Inf)                |
| WEAK, VOCAL CORD                    | 3                                       | 29.2851    | 59                                         | 28.4561       | 1.0291(0.3215-3.294)    |
| WEAKNESS, EYE MUSCLE                | 0                                       | 0          | 6                                          | 1.881         | 0(0-Inf)                |
| WEAKNESS, HYPOPHARYNX               | 0                                       | 0          | 3                                          | 2.8217        | 0(0-Inf)                |
| WEAKNESS, MUSCULAR                  | 49                                      | 484.7165   | 905                                        | 435.399       | 1.1133(0.8343-1.4854)   |
| WEAKNESS, NERVE, SEE ALSO PARALYSIS | 0                                       | 0          | 7                                          | 4.3354        | 0(0-Inf)                |
| WEAKNESS, NOS (GENERALIZED)         | 62                                      | 811.4913   | 1043                                       | 740.0409      | 1.0965(0.8481-1.4177)   |
| WEAKNESS, RESPIRATORY (MUSCLE)      | 0                                       | 0          | 9                                          | 3.9068        | 0(0-Inf)                |
| WEAKNESS, UPPER EXTREMITY           | 12                                      | 111.9605   | 246                                        | 110.2324      | 1.0157(0.5681-1.816)    |
| WEB, CANTHUS                        | 0                                       | 0          | 1                                          | 0.4049        | 0(0-Inf)                |
| WEB, ESOPHAGUS, CONGENITAL          | 0                                       | 0          | 4                                          | 1.012         | 0(0-Inf)                |
| WEB, ESOPHAGUS, NOS                 | 0                                       | 0          | 14                                         | 8.9449        | 0(0-Inf)                |

| Description                                              | No. of Positive Cases with Disease Code | Case Rate* | No. of Positive Controls with Disease Code | Control Rate* | Relative Risk (95%CI)    |
|----------------------------------------------------------|-----------------------------------------|------------|--------------------------------------------|---------------|--------------------------|
| WEB, FINGERS                                             | 0                                       | 0          | 2                                          | 0.6309        | 0(0-Inf)                 |
| WEB, LARYNX, CONGENITAL                                  | 0                                       | 0          | 2                                          | 1.0782        | 0(0-Inf)                 |
| WEB, NECK                                                | 0                                       | 0          | 1                                          | 0.3526        | 0(0-Inf)                 |
| WEB, TOES                                                | 1                                       | 6.9639     | 1                                          | 0.2539        | 27.4273(1.5981-470.7233) |
| WEDGING (VERTEBRAE)                                      | 2                                       | 14.3733    | 36                                         | 10.1773       | 1.4123(0.338-5.9013)     |
| WEIGHT, GAIN                                             | 17                                      | 135.013    | 608                                        | 210.3971      | 0.6417(0.3959-1.0402)    |
| WEIGHT, TRAINING PROGRAM                                 | 0                                       | 0          | 1                                          | 0.234         | 0(0-Inf)                 |
| WEN (CODE ALSO CYST BY SITE)                             | 3                                       | 21.7069    | 20                                         | 4.7097        | 4.609(1.3527-15.7039)    |
| WHEEZING                                                 | 6                                       | 59.2552    | 201                                        | 98.1578       | 0.6037(0.2676-1.3616)    |
| WHIPLASH INJURY                                          | 0                                       | 0          | 22                                         | 5.3168        | 0(0-Inf)                 |
| WHITE, NAIL OF TERRY                                     | 0                                       | 0          | 1                                          | 0.3526        | 0(0-Inf)                 |
| WHITLOW, HERPETIC                                        | 0                                       | 0          | 2                                          | 0.8101        | 0(0-Inf)                 |
| WIDENING (MEDIASTINAL)                                   | 0                                       | 0          | 1                                          | 0.8531        | 0(0-Inf)                 |
| WINDOW, AORTOPULMONARY                                   | 0                                       | 0          | 2                                          | 1.7754        | 0(0-Inf)                 |
| WINGED SCAPULA                                           | 0                                       | 0          | 7                                          | 1.7144        | 0(0-Inf)                 |
| WOUND, GUNSHOT, INTRACRANIAL                             | 0                                       | 0          | 2                                          | 1.7753        | 0(0-Inf)                 |
| WOUND, OPEN (INTENTIONAL FOR IRRIGATION/DEBRIDEMENT/ETC) | 1                                       | 9.3622     | 54                                         | 24.5183       | 0.3818(0.0527-2.7661)    |
| WOUND, OPEN, ABDOMEN, NEC                                | 2                                       | 14.8682    | 11                                         | 3.4441        | 4.317(0.9434-19.7556)    |
| WOUND, OPEN, ABDOMEN, NEC, COMPLICATED                   | 0                                       | 0          | 3                                          | 0.9165        | 0(0-Inf)                 |
| WOUND, OPEN, ANKLE                                       | 0                                       | 0          | 40                                         | 9.8336        | 0(0-Inf)                 |
| WOUND, OPEN, ANKLE, COMPLICATED                          | 0                                       | 0          | 6                                          | 1.6178        | 0(0-Inf)                 |
| WOUND, OPEN, ARM                                         | 7                                       | 52.9575    | 67                                         | 21.3988       | 2.4748(1.1304-5.418)     |
| WOUND, OPEN, ARM, COMPLICATED                            | 0                                       | 0          | 13                                         | 3.105         | 0(0-Inf)                 |
| WOUND, OPEN, ARM, LATE EFFECT                            | 0                                       | 0          | 1                                          | 0.3526        | 0(0-Inf)                 |
| WOUND, OPEN, AUDITORY CANAL                              | 0                                       | 0          | 16                                         | 4.3688        | 0(0-Inf)                 |
| WOUND, OPEN, AURICLE, EAR                                | 0                                       | 0          | 2                                          | 1.7757        | 0(0-Inf)                 |
| WOUND, OPEN, AXILLA                                      | 0                                       | 0          | 3                                          | 0.7799        | 0(0-Inf)                 |
| WOUND, OPEN, AXILLA, COMPLICATED                         | 0                                       | 0          | 1                                          | 0.234         | 0(0-Inf)                 |
| WOUND, OPEN, BACK                                        | 0                                       | 0          | 2                                          | 0.7897        | 0(0-Inf)                 |
| WOUND, OPEN, BACK, COMPLICATED                           | 0                                       | 0          | 2                                          | 0.6309        | 0(0-Inf)                 |
| WOUND, OPEN, BUTTOCK                                     | 3                                       | 21.5493    | 10                                         | 2.7863        | 7.734(2.0848-28.6914)    |
| WOUND, OPEN, BUTTOCK, COMPLICATED                        | 0                                       | 0          | 2                                          | 0.4853        | 0(0-Inf)                 |
| WOUND, OPEN, CANALICULUS SEE ALSO EYE                    | 0                                       | 0          | 1                                          | 2.4859        | 0(0-Inf)                 |
| WOUND, OPEN, CHEEK                                       | 0                                       | 0          | 28                                         | 6.9111        | 0(0-Inf)                 |
| WOUND, OPEN, CHEEK, COMPLICATED                          | 0                                       | 0          | 3                                          | 0.7176        | 0(0-Inf)                 |
| WOUND, OPEN, CHEST WALL                                  | 0                                       | 0          | 11                                         | 2.8792        | 0(0-Inf)                 |
| WOUND, OPEN, CHEST WALL, COMPLICATED                     | 0                                       | 0          | 3                                          | 0.7461        | 0(0-Inf)                 |
| WOUND, OPEN, CORNEA                                      | 0                                       | 0          | 13                                         | 4.221         | 0(0-Inf)                 |

| Description                                                                  | No. of Positive Cases with Disease Code | Case Rate* | No. of Positive Controls with Disease Code | Control Rate* | Relative Risk (95%CI)  |
|------------------------------------------------------------------------------|-----------------------------------------|------------|--------------------------------------------|---------------|------------------------|
| WOUND, OPEN, DELAY HEALING, UPPER EXT CODE ALSO SITE, COMPLICATED            | 0                                       | 0          | 1                                          | 0.8886        | 0(0-Inf)               |
| WOUND, OPEN, DELAYED TREATMENT, LOWER EXTREMITY, CODE ALSO SITE, COMPLICATED | 0                                       | 0          | 1                                          | 0.2354        | 0(0-Inf)               |
| WOUND, OPEN, EAR                                                             | 1                                       | 6.9471     | 82                                         | 20.5305       | 0.3384(0.047-2.4349)   |
| WOUND, OPEN, EAR, COMPLICATED                                                | 0                                       | 0          | 1                                          | 2.4856        | 0(0-Inf)               |
| WOUND, OPEN, ELBOW                                                           | 8                                       | 60.5551    | 119                                        | 38.1117       | 1.5889(0.7742-3.261)   |
| WOUND, OPEN, ELBOW, COMPLICATED                                              | 1                                       | 7.3831     | 8                                          | 2.0836        | 3.5434(0.4375-28.6965) |
| WOUND, OPEN, ELBOW, LATE EFFECT                                              | 0                                       | 0          | 1                                          | 1.036         | 0(0-Inf)               |
| WOUND, OPEN, EPIGASTRIC REGION                                               | 0                                       | 0          | 1                                          | 2.4855        | 0(0-Inf)               |
| WOUND, OPEN, EYE                                                             | 3                                       | 21.1636    | 51                                         | 12.8931       | 1.6415(0.51-5.2832)    |
| WOUND, OPEN, EYEBALL, LATE EFFECT                                            | 0                                       | 0          | 1                                          | 0.3526        | 0(0-Inf)               |
| WOUND, OPEN, EYEBROW                                                         | 11                                      | 77.7274    | 207                                        | 55.376        | 1.4036(0.7636-2.5801)  |
| WOUND, OPEN, EYEBROW, LATE EFFECT                                            | 0                                       | 0          | 1                                          | 0.2354        | 0(0-Inf)               |
| WOUND, OPEN, EYELID                                                          | 2                                       | 13.8848    | 54                                         | 14.36         | 0.9669(0.2349-3.9804)  |
| WOUND, OPEN, FACE, LATE EFFECT                                               | 0                                       | 0          | 1                                          | 0.2354        | 0(0-Inf)               |
| WOUND, OPEN, FACE, NEC                                                       | 3                                       | 20.9327    | 75                                         | 18.5965       | 1.1256(0.3537-3.5819)  |
| WOUND, OPEN, FACE, NEC, COMPLICATED                                          | 0                                       | 0          | 4                                          | 1.53          | 0(0-Inf)               |
| WOUND, OPEN, FINGER(S)                                                       | 59                                      | 504.2172   | 1612                                       | 429.5896      | 1.1737(0.9046-1.523)   |
| WOUND, OPEN, FINGER, COMPLICATED                                             | 11                                      | 88.6317    | 307                                        | 77.1666       | 1.1486(0.6284-2.0992)  |
| WOUND, OPEN, FINGER, LATE EFFECT                                             | 0                                       | 0          | 7                                          | 2.0189        | 0(0-Inf)               |
| WOUND, OPEN, FOOT                                                            | 5                                       | 42.4533    | 289                                        | 75.3387       | 0.5635(0.2325-1.3657)  |
| WOUND, OPEN, FOOT, COMPLICATED                                               | 4                                       | 29.092     | 104                                        | 25.1539       | 1.1566(0.4248-3.149)   |
| WOUND, OPEN, FOOT, LATE EFFECT                                               | 0                                       | 0          | 2                                          | 0.5709        | 0(0-Inf)               |
| WOUND, OPEN, FOREARM                                                         | 9                                       | 62.5543    | 269                                        | 71.079        | 0.8801(0.4522-1.7127)  |
| WOUND, OPEN, FOREARM, COMPLICATED                                            | 0                                       | 0          | 26                                         | 6.8114        | 0(0-Inf)               |
| WOUND, OPEN, FOREARM, LATE EFFECT                                            | 0                                       | 0          | 1                                          | 2.4858        | 0(0-Inf)               |
| WOUND, OPEN, FOREHEAD                                                        | 12                                      | 87.6612    | 350                                        | 103.6175      | 0.846(0.4752-1.5062)   |
| WOUND, OPEN, FOREHEAD, COMPLICATED                                           | 0                                       | 0          | 1                                          | 1.0361        | 0(0-Inf)               |
| WOUND, OPEN, FOREHEAD, LATE EFFECT                                           | 0                                       | 0          | 1                                          | 2.4881        | 0(0-Inf)               |
| WOUND, OPEN, FOREIGN BODY, LOWER EXTREMITY, CODE ALSO SITE, COMPLICATED      | 0                                       | 0          | 2                                          | 0.7897        | 0(0-Inf)               |
| WOUND, OPEN, FOREIGN BODY, UPPER EXTREMITY, CODE ALSO BY SITE, COMPLICATED   | 0                                       | 0          | 5                                          | 1.3913        | 0(0-Inf)               |
| WOUND, OPEN, GUM                                                             | 0                                       | 0          | 7                                          | 2.5161        | 0(0-Inf)               |
| WOUND, OPEN, HAND                                                            | 39                                      | 296.3762   | 777                                        | 198.0627      | 1.4964(1.0837-2.0663)  |
| WOUND, OPEN, HAND, COMPLICATED                                               | 5                                       | 37.748     | 124                                        | 30.5074       | 1.2373(0.5047-3.0336)  |
| WOUND, OPEN, HAND, LATE EFFECT                                               | 0                                       | 0          | 8                                          | 2.4455        | 0(0-Inf)               |
| WOUND, OPEN, HEAD                                                            | 7                                       | 73.443     | 189                                        | 101.4469      | 0.724(0.3399-1.5417)   |
| WOUND, OPEN, HIP                                                             | 0                                       | 0          | 2                                          | 0.8725        | 0(0-Inf)               |



| Description                                                            | No. of Positive Cases with Disease Code | Case Rate* | No. of Positive Controls with Disease Code | Control Rate* | Relative Risk (95%CI)  |
|------------------------------------------------------------------------|-----------------------------------------|------------|--------------------------------------------|---------------|------------------------|
| WOUND, OPEN, HIP, COMPLICATED                                          | 0                                       | 0          | 1                                          | 0.4751        | 0(0-Inf)               |
| WOUND, OPEN, INFECTED, HEAD, CODE ALSO BY SITE, COMPLICATED            | 0                                       | 0          | 2                                          | 0.4709        | 0(0-Inf)               |
| WOUND, OPEN, INFECTED, LOWER EXTREMITY, CODE ALSO BY SITE, COMPLICATED | 3                                       | 20.8697    | 61                                         | 15.1349       | 1.3789(0.4307-4.415)   |
| WOUND, OPEN, INFECTED, UPPER EXTREMITY, CODE ALSO BY SITE, COMPLICATED | 6                                       | 43.1579    | 123                                        | 29.648        | 1.4557(0.6396-3.3132)  |
| WOUND, OPEN, INGUINAL REGION                                           | 0                                       | 0          | 1                                          | 0.234         | 0(0-Inf)               |
| WOUND, OPEN, IRIS                                                      | 0                                       | 0          | 2                                          | 0.5458        | 0(0-Inf)               |
| WOUND, OPEN, JAW                                                       | 0                                       | 0          | 1                                          | 0.398         | 0(0-Inf)               |
| WOUND, OPEN, KNEE                                                      | 3                                       | 22.5982    | 112                                        | 27.8717       | 0.8108(0.257-2.558)    |
| WOUND, OPEN, KNEE, COMPLICATED                                         | 0                                       | 0          | 14                                         | 3.3319        | 0(0-Inf)               |
| WOUND, OPEN, LEG                                                       | 13                                      | 92.4197    | 268                                        | 73.5586       | 1.2564(0.7186-2.1966)  |
| WOUND, OPEN, LEG, COMPLICATED                                          | 1                                       | 6.9642     | 43                                         | 10.6281       | 0.6553(0.0899-4.7761)  |
| WOUND, OPEN, LEG, LATE EFFECT                                          | 0                                       | 0          | 4                                          | 0.9158        | 0(0-Inf)               |
| WOUND, OPEN, LIP                                                       | 4                                       | 27.8019    | 173                                        | 43.7773       | 0.6351(0.2353-1.7144)  |
| WOUND, OPEN, LIP, COMPLICATED                                          | 0                                       | 0          | 3                                          | 0.7885        | 0(0-Inf)               |
| WOUND, OPEN, LOWER EXTREMITY                                           | 1                                       | 12.3027    | 58                                         | 39.5945       | 0.3107(0.043-2.247)    |
| WOUND, OPEN, LOWER EXTREMITY, COMPLICATED                              | 0                                       | 0          | 7                                          | 2.5761        | 0(0-Inf)               |
| WOUND, OPEN, LOWER EXTREMITY, LATE EFFECT                              | 0                                       | 0          | 1                                          | 0.2729        | 0(0-Inf)               |
| WOUND, OPEN, LOWER LEG                                                 | 1                                       | 6.9395     | 49                                         | 12.4495       | 0.5574(0.0767-4.0502)  |
| WOUND, OPEN, LOWER LEG, COMPLICATED                                    | 0                                       | 0          | 7                                          | 1.5623        | 0(0-Inf)               |
| WOUND, OPEN, LUMBAR REGION                                             | 0                                       | 0          | 1                                          | 0.4751        | 0(0-Inf)               |
| WOUND, OPEN, MOUTH                                                     | 0                                       | 0          | 16                                         | 3.9211        | 0(0-Inf)               |
| WOUND, OPEN, MULTIPLE SITES                                            | 3                                       | 21.9341    | 24                                         | 7.223         | 3.0367(0.9063-10.1753) |
| WOUND, OPEN, MULTIPLE SITES, COMPLICATED                               | 0                                       | 0          | 4                                          | 1.2654        | 0(0-Inf)               |
| WOUND, OPEN, NECK                                                      | 0                                       | 0          | 5                                          | 2.4564        | 0(0-Inf)               |
| WOUND, OPEN, NOS, (SITE NOT STATED)                                    | 19                                      | 168.2228   | 408                                        | 168.1028      | 1.0007(0.6309-1.5874)  |
| WOUND, OPEN, NOS, INFECTED (SITE NOT STATED)                           | 1                                       | 7.6079     | 55                                         | 17.5597       | 0.4333(0.0598-3.1385)  |
| WOUND, OPEN, NOSE                                                      | 5                                       | 35.2856    | 104                                        | 28.6949       | 1.2297(0.4998-3.0255)  |
| WOUND, OPEN, PENIS                                                     | 0                                       | 0          | 8                                          | 2.2835        | 0(0-Inf)               |
| WOUND, OPEN, PERINEUM                                                  | 0                                       | 0          | 1                                          | 0.4048        | 0(0-Inf)               |
| WOUND, OPEN, PHARYNX                                                   | 0                                       | 0          | 2                                          | 0.4854        | 0(0-Inf)               |
| WOUND, OPEN, PINNA                                                     | 0                                       | 0          | 4                                          | 1.412         | 0(0-Inf)               |
| WOUND, OPEN, RETINA                                                    | 0                                       | 0          | 2                                          | 0.9504        | 0(0-Inf)               |
| WOUND, OPEN, SACROILIAC REGION                                         | 0                                       | 0          | 1                                          | 0.8532        | 0(0-Inf)               |
| WOUND, OPEN, SCALP                                                     | 1                                       | 7.2174     | 25                                         | 7.4861        | 0.9641(0.13-7.152)     |
| WOUND, OPEN, SCALP, COMPLICATED                                        | 0                                       | 0          | 2                                          | 1.266         | 0(0-Inf)               |
| WOUND, OPEN, SCROTUM                                                   | 0                                       | 0          | 4                                          | 1.4106        | 0(0-Inf)               |
| WOUND, OPEN, SHOULDER                                                  | 1                                       | 7.0193     | 13                                         | 3.246         | 2.1624(0.2799-16.7043) |

| Description                                           | No. of Positive<br>Cases with<br>Disease Code | Case<br>Rate* | No. of Positive<br>Controls with<br>Disease Code | Control<br>Rate* | Relative Risk (95%CI)  |
|-------------------------------------------------------|-----------------------------------------------|---------------|--------------------------------------------------|------------------|------------------------|
| WOUND, OPEN, SHOULDER, LATE EFFECT                    | 0                                             | 0             | 1                                                | 0.234            | 0(0-Inf)               |
| WOUND, OPEN, SKIN, COMPLICATED                        | 0                                             | 0             | 4                                                | 2.1584           | 0(0-Inf)               |
| WOUND, OPEN, SKIN, NEC                                | 11                                            | 175.2788      | 74                                               | 72.2638          | 2.4255(1.2842-4.5813)  |
| WOUND, OPEN, SUBCUTANEOUS, NEC                        | 0                                             | 0             | 1                                                | 0.234            | 0(0-Inf)               |
| WOUND, OPEN, SUPRAORBITAL (REGION)-SEE ALSO FACE, NEC | 2                                             | 21.9507       | 14                                               | 8.0124           | 2.7396(0.617-12.164)   |
| WOUND, OPEN, TESTIS                                   | 0                                             | 0             | 1                                                | 0.888            | 0(0-Inf)               |
| WOUND, OPEN, THIGH                                    | 1                                             | 7.8001        | 73                                               | 18.9545          | 0.4115(0.0571-2.9661)  |
| WOUND, OPEN, THIGH, COMPLICATED                       | 0                                             | 0             | 21                                               | 6.9406           | 0(0-Inf)               |
| WOUND, OPEN, THIGH, LATE EFFECT                       | 0                                             | 0             | 1                                                | 0.2729           | 0(0-Inf)               |
| WOUND, OPEN, THUMB                                    | 25                                            | 200.1682      | 614                                              | 158.1428         | 1.2657(0.8475-1.8903)  |
| WOUND, OPEN, THUMB, COMPLICATED                       | 7                                             | 53.6134       | 104                                              | 25.8454          | 2.0744(0.9616-4.4749)  |
| WOUND, OPEN, THUMB, LATE EFFECT                       | 0                                             | 0             | 4                                                | 1.142            | 0(0-Inf)               |
| WOUND, OPEN, TOE                                      | 3                                             | 21.1957       | 114                                              | 27.7423          | 0.764(0.2422-2.41)     |
| WOUND, OPEN, TOE, COMPLICATED                         | 1                                             | 7.9559        | 23                                               | 5.637            | 1.4114(0.1893-10.5222) |
| WOUND, OPEN, TONGUE                                   | 1                                             | 6.9074        | 20                                               | 5.3609           | 1.2885(0.1719-9.6584)  |
| WOUND, OPEN, TRUNK, NEC                               | 0                                             | 0             | 2                                                | 2.5449           | 0(0-Inf)               |
| WOUND, OPEN, TRUNK, NOS                               | 0                                             | 0             | 2                                                | 3.081            | 0(0-Inf)               |
| WOUND, OPEN, TYMPANIC MEMBRANE                        | 0                                             | 0             | 4                                                | 1.3086           | 0(0-Inf)               |
| WOUND, OPEN, UPPER ARM                                | 0                                             | 0             | 4                                                | 1.2656           | 0(0-Inf)               |
| WOUND, OPEN, UPPER ARM, COMPLICATED                   | 0                                             | 0             | 1                                                | 0.3526           | 0(0-Inf)               |
| WOUND, OPEN, UPPER EXTREMITY                          | 0                                             | 0             | 9                                                | 2.3098           | 0(0-Inf)               |
| WOUND, OPEN, UPPER EXTREMITY, COMPLICATED             | 0                                             | 0             | 2                                                | 0.5709           | 0(0-Inf)               |
| WOUND, OPEN, UPPER EXTREMITY, LATE EFFECT             | 0                                             | 0             | 1                                                | 0.2354           | 0(0-Inf)               |
| WOUND, OPEN, UPPER LEG                                | 0                                             | 0             | 1                                                | 0.3526           | 0(0-Inf)               |
| WOUND, OPEN, UPPER LEG, COMPLICATED                   | 0                                             | 0             | 1                                                | 0.4751           | 0(0-Inf)               |
| WOUND, OPEN, VAGINA                                   | 0                                             | 0             | 3                                                | 0.7064           | 0(0-Inf)               |
| WOUND, OPEN, WRIST                                    | 8                                             | 67.1413       | 123                                              | 31.9531          | 2.1012(1.0246-4.3094)  |
| WOUND, OPEN, WRIST, COMPLICATED                       | 0                                             | 0             | 10                                               | 2.8776           | 0(0-Inf)               |
| WOUND, OPEN, WRIST, LATE EFFECT                       | 0                                             | 0             | 1                                                | 0.2729           | 0(0-Inf)               |
| WOUND, UNHEALED (POST-OP)                             | 2                                             | 17.2753       | 77                                               | 30.7715          | 0.5614(0.1376-2.291)   |
| WRINKLES, LENS                                        | 0                                             | 0             | 1                                                | 0.2354           | 0(0-Inf)               |
| WRINKLES, MACULA (RETINA)                             | 0                                             | 0             | 3                                                | 1.5108           | 0(0-Inf)               |
| WRINKLES, NOS (SKIN)                                  | 4                                             | 28.6499       | 114                                              | 25.1219          | 1.1404(0.4193-3.1016)  |
| WRY NECK (SEE ALSO TORTICOLLIS)                       | 1                                             | 8.9376        | 38                                               | 9.4689           | 0.9439(0.129-6.9054)   |
| XANTHELASMA, EYELID                                   | 3                                             | 22.1869       | 26                                               | 6.2737           | 3.5365(1.0602-11.796)  |
| XANTHELASMA, NOS                                      | 2                                             | 13.9501       | 48                                               | 11.6776          | 1.1946(0.2889-4.9395)  |
| XANTHOGRANULOMA                                       | 1                                             | 7.281         | 7                                                | 1.6403           | 4.439(0.5348-36.8432)  |
| XANTHOMA, HEAD                                        | 1                                             | 7.2022        | 6                                                | 1.721            | 4.1848(0.4931-35.5175) |
| XANTHOMA, NOS                                         | 0                                             | 0             | 8                                                | 1.9283           | 0(0-Inf)               |
| XANTHOMA, SITE NEC                                    | 0                                             | 0             | 7                                                | 2.2359           | 0(0-Inf)               |

| Description                          | No. of Positive Cases with Disease Code | Case Rate* | No. of Positive Controls with Disease Code | Control Rate* | Relative Risk (95%CI) |
|--------------------------------------|-----------------------------------------|------------|--------------------------------------------|---------------|-----------------------|
| XANTHOMA, TRUNK                      | 0                                       | 0          | 2                                          | 0.4854        | 0(0-Inf)              |
| XANTHOMA, UPPER EXTREMITY            | 0                                       | 0          | 10                                         | 3.2028        | 0(0-Inf)              |
| XERODERMA, ACQUIRED                  | 1                                       | 6.968      | 68                                         | 17.8305       | 0.3908(0.0541-2.821)  |
| XEROPHTHALMIA (VITAMIN A DEFICIENCY) | 0                                       | 0          | 8                                          | 3.159         | 0(0-Inf)              |
| XEROSIS, NOS                         | 30                                      | 271.0494   | 758                                        | 317.147       | 0.8546(0.5929-1.2321) |
| XEROSTOMIA                           | 3                                       | 29.5751    | 91                                         | 45.0277       | 0.6568(0.2075-2.0794) |
| XIPHODYNIA                           | 0                                       | 0          | 2                                          | 0.6309        | 0(0-Inf)              |
| ZOON'S                               | 0                                       | 0          | 3                                          | 1.0578        | 0(0-Inf)              |
